# Supplementary material
Source: PubMed Central journal article supplement (PMC6858555)

**Supplementary Data Set: Regional association plots of 183 genome-wide significant loci from trans-ethnic meta-analysis.**

Regional association plots are shown for all genome-wide significant loci from trans-ethnic meta-analysis (n=457,690). The y-axis shows  $-\log_{10}$ (two-sided nominal p-value) from the meta-analysis using inverse variance weighted fixed effect method. Correlation ( $r^2$ ) with the index SNP was estimated based on the 1000 Genomes EUR reference samples. Plots were generated using the stand-alone version 1.3 of LocusZoom (Pruim, R.J. *et al. Bioinformatics* 26, 2336-7, 2010). Genetic positions refer to GRCh37/hg19 coordinates. Zoomed in versions of pages 19, 21, 52, 54, 57, 69, 71, 93, 115, and 119 are appended at the end of the document.

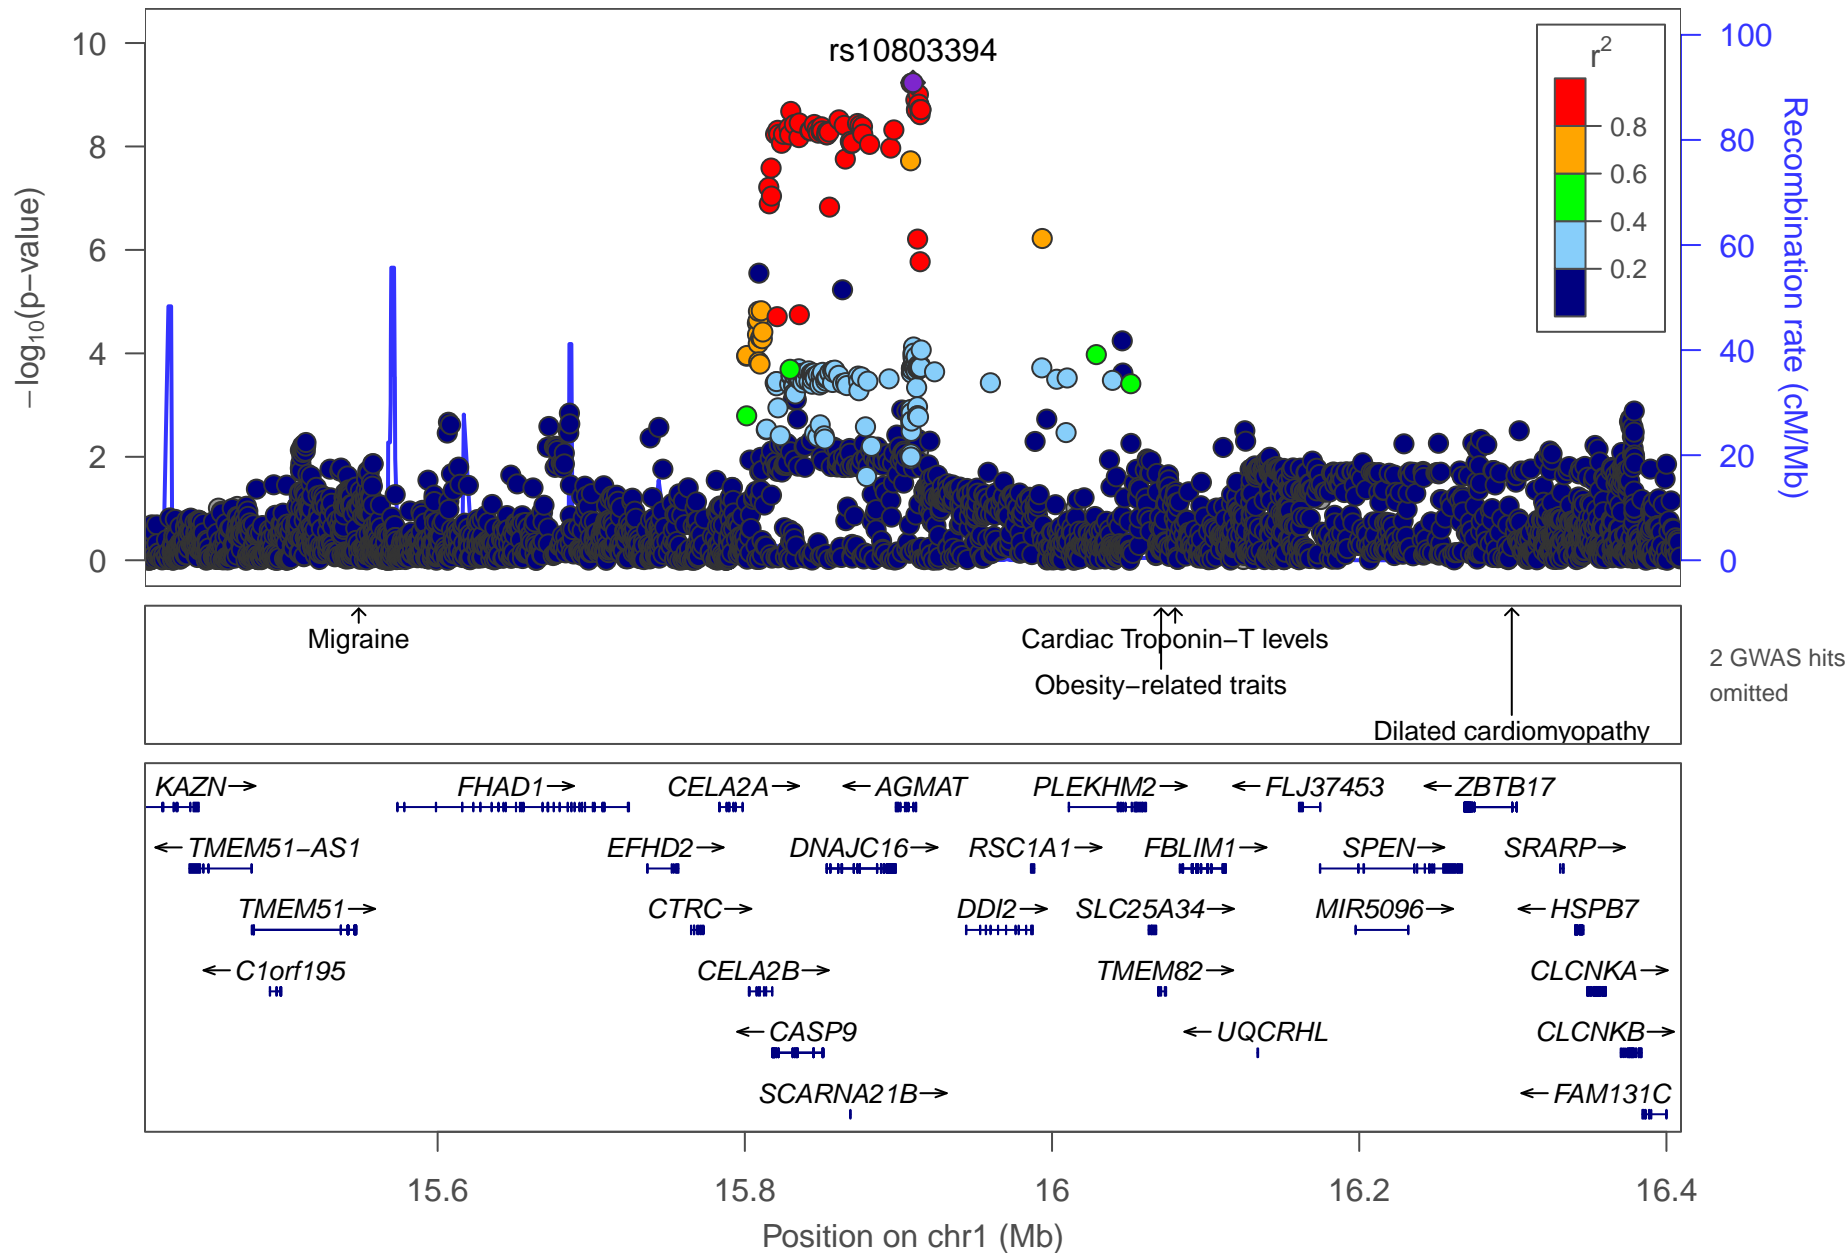

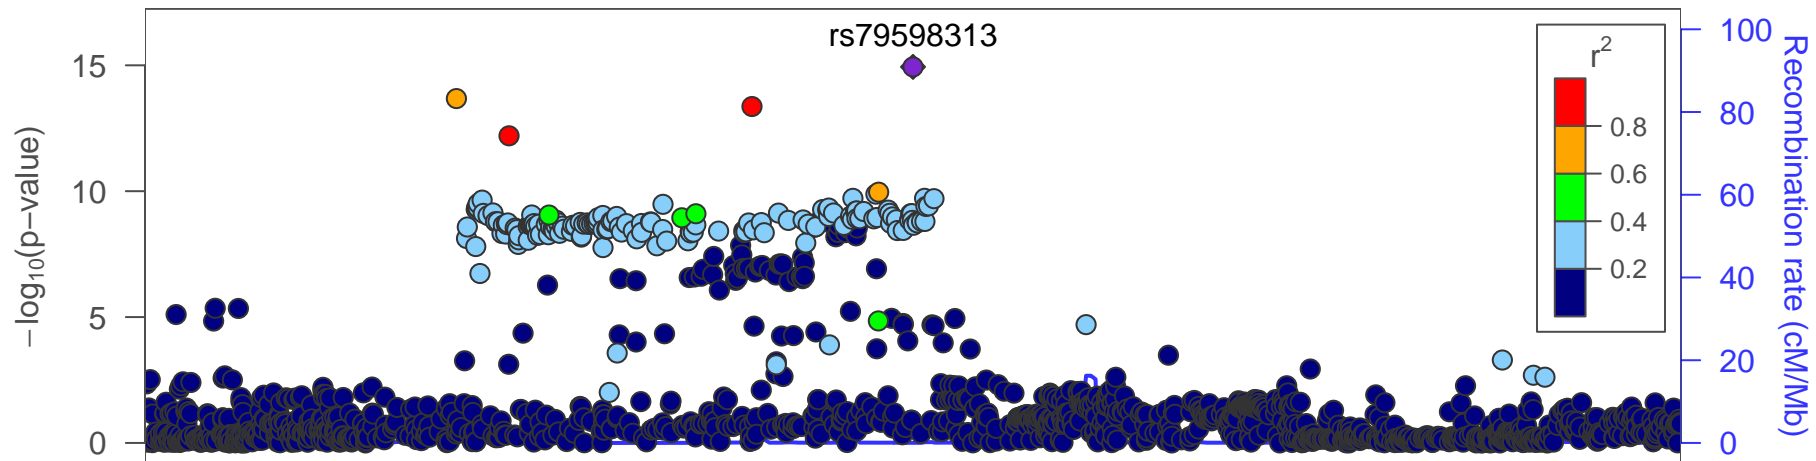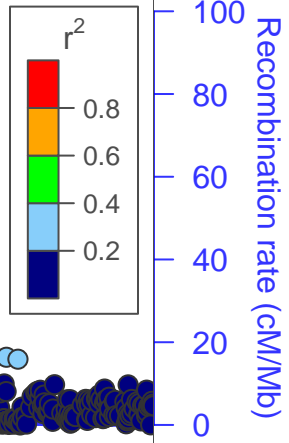

HDL cholesterol  
 LDL cholesterol  
 Triglycerides

Estradiol plasma levels (br)

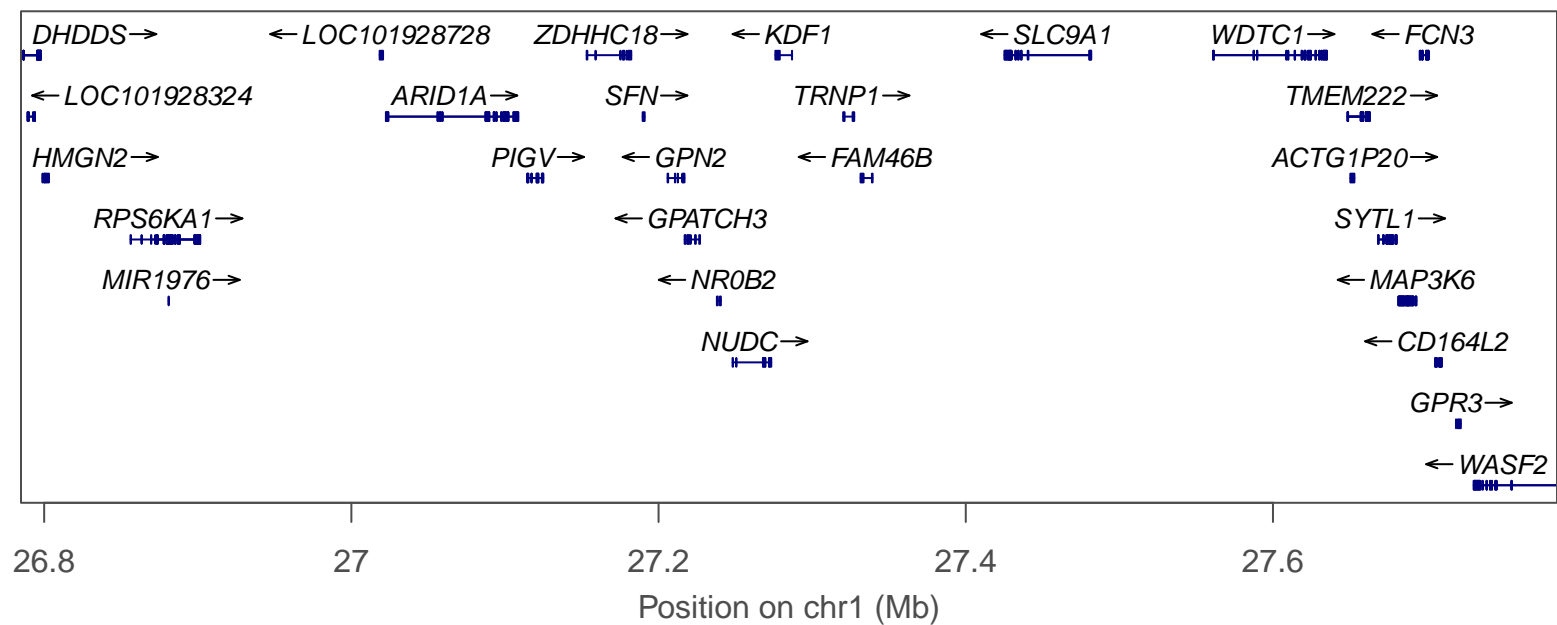

26.8

27

27.2

27.4

27.6

Position on chr1 (Mb)

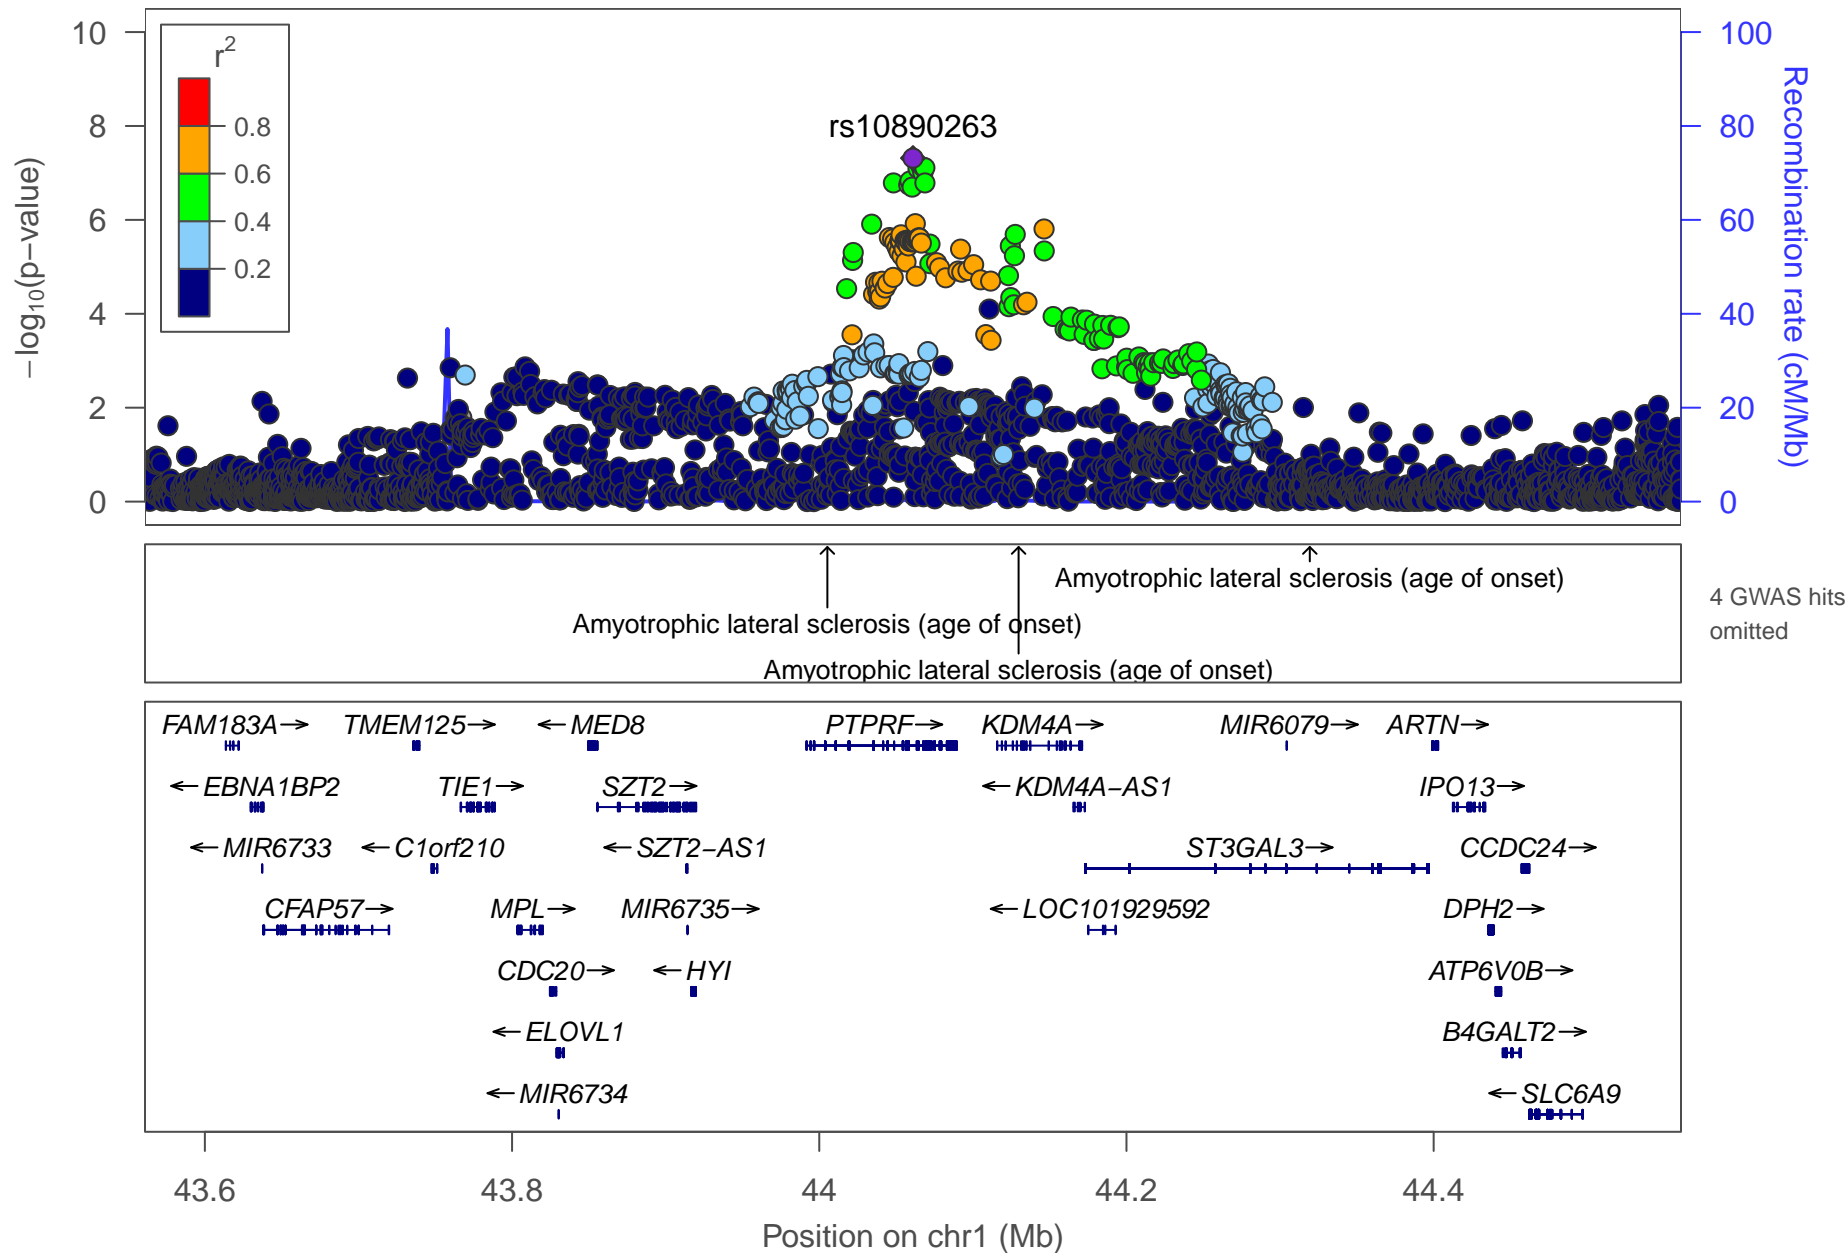

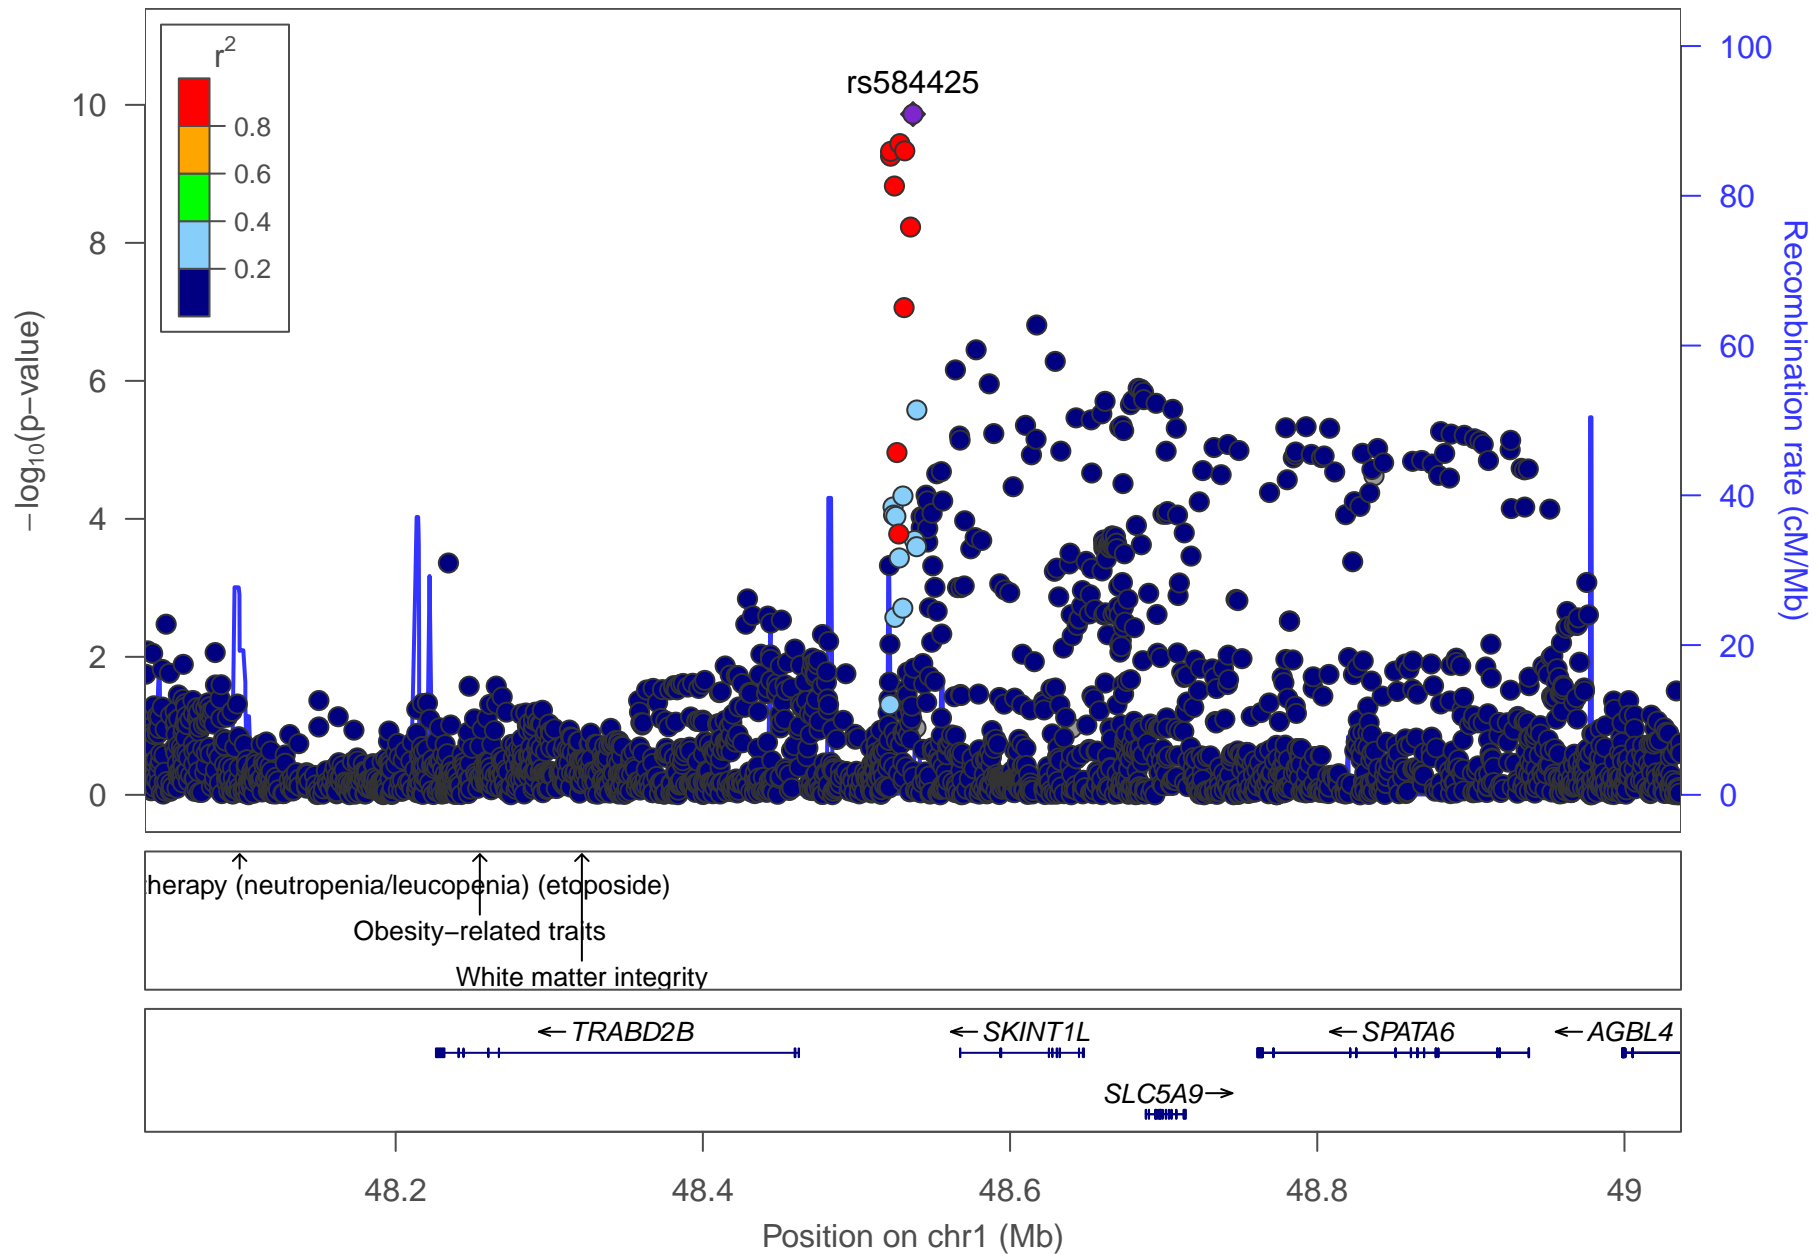

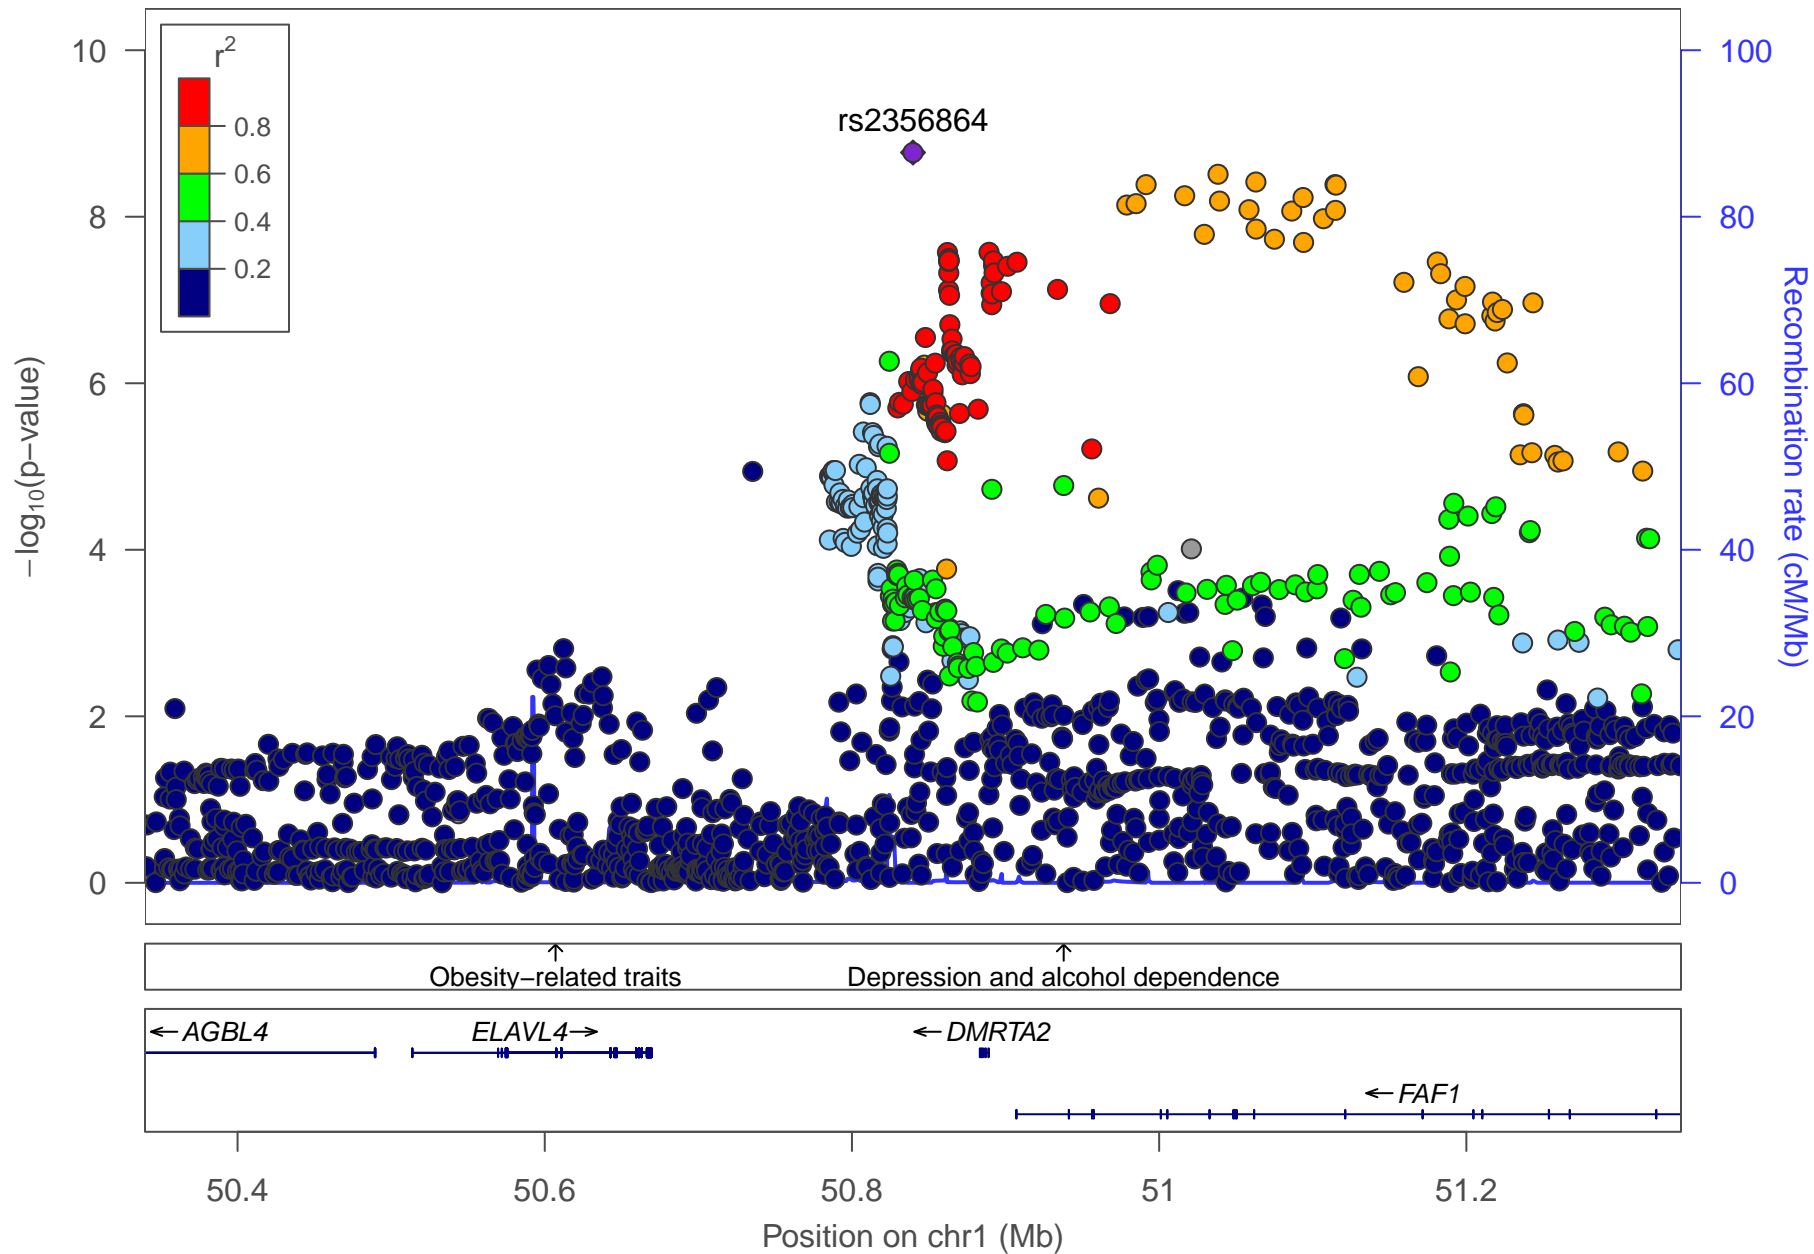

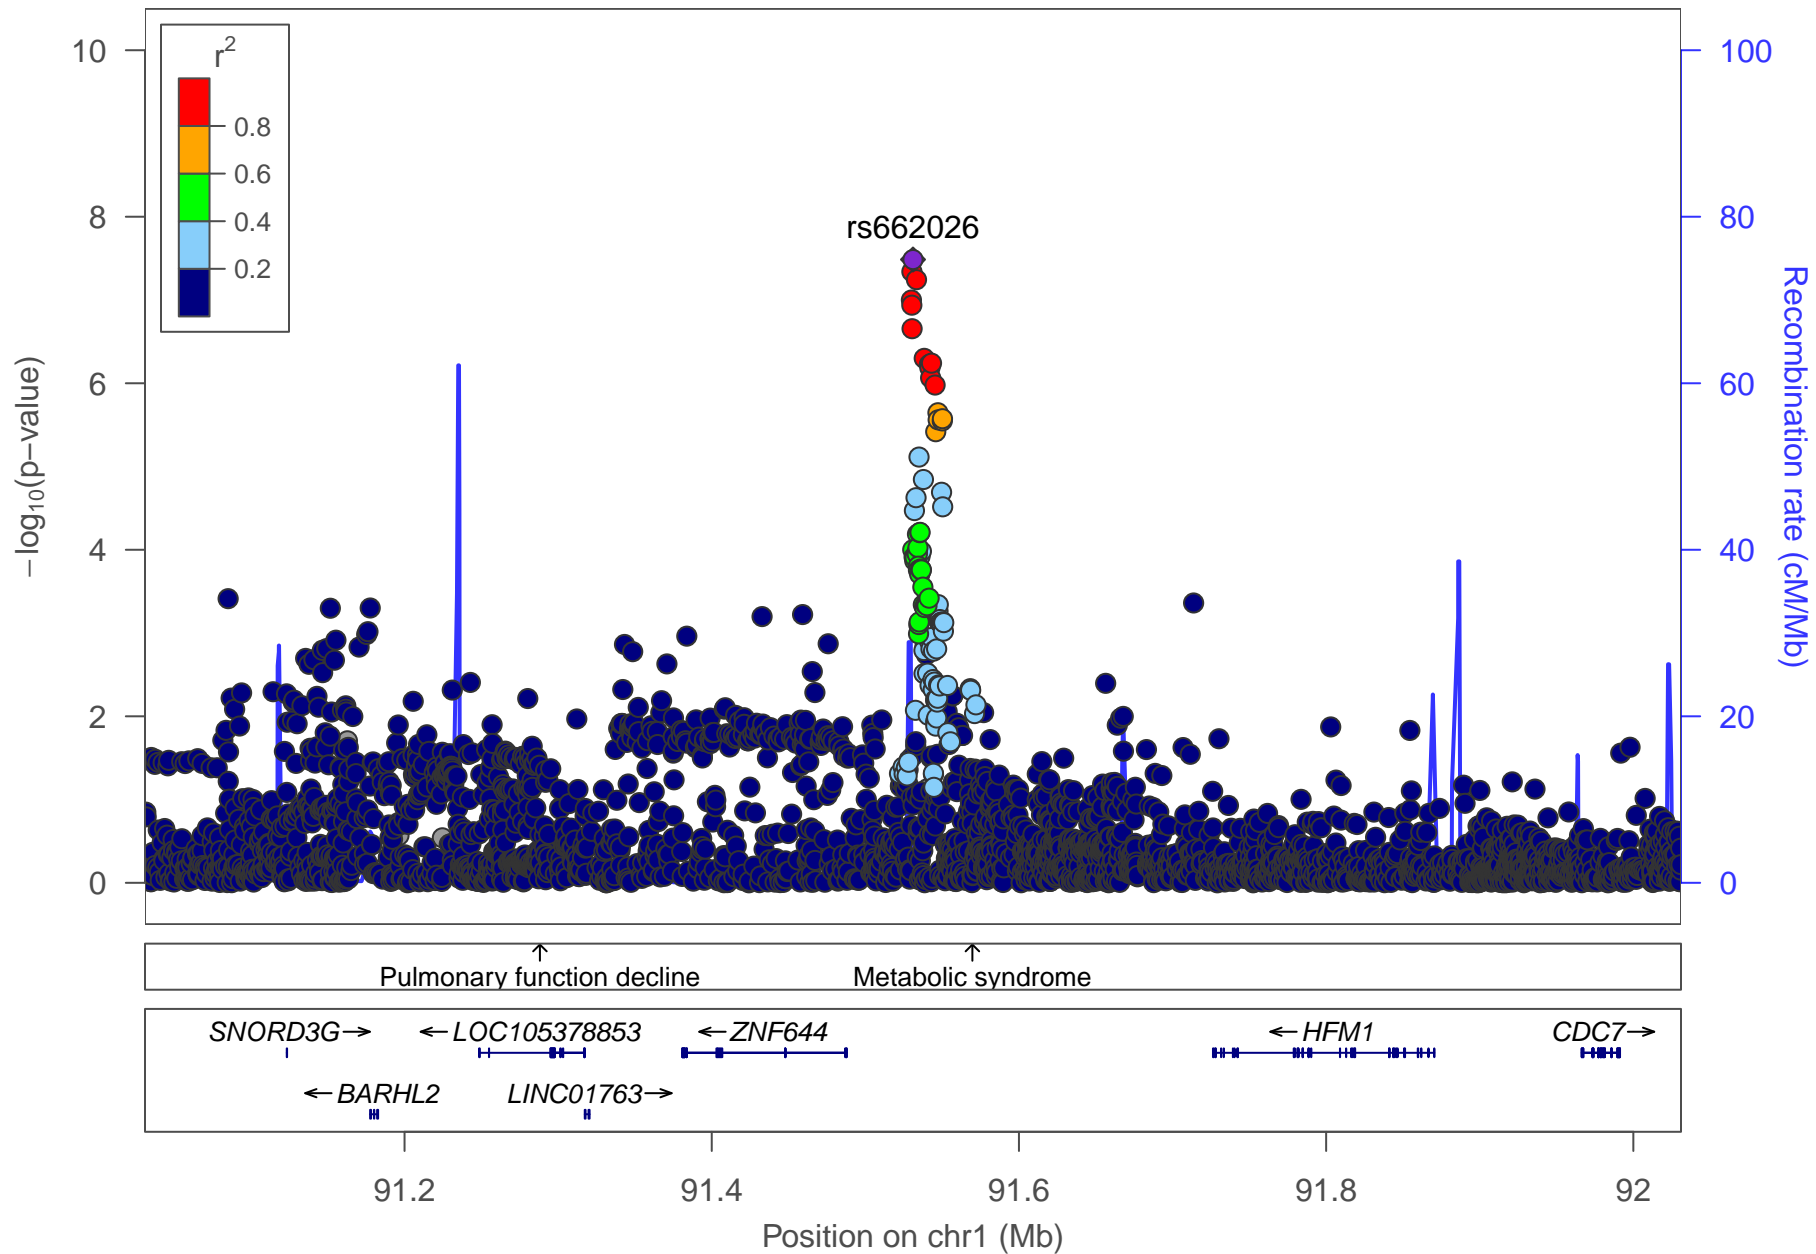

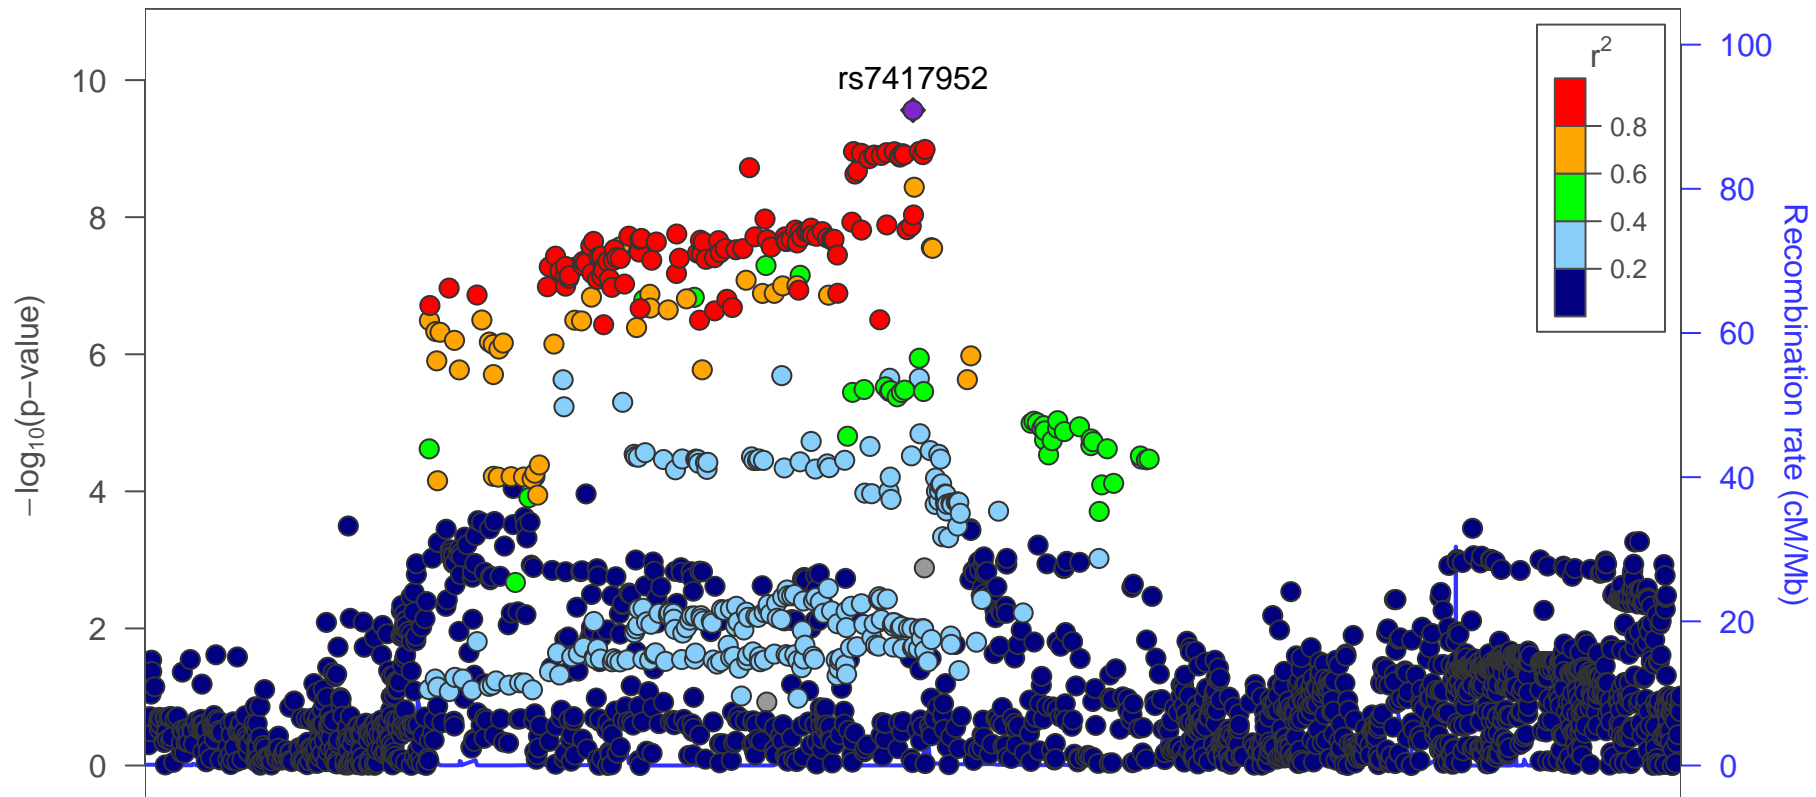

↑  
border and schizophrenia

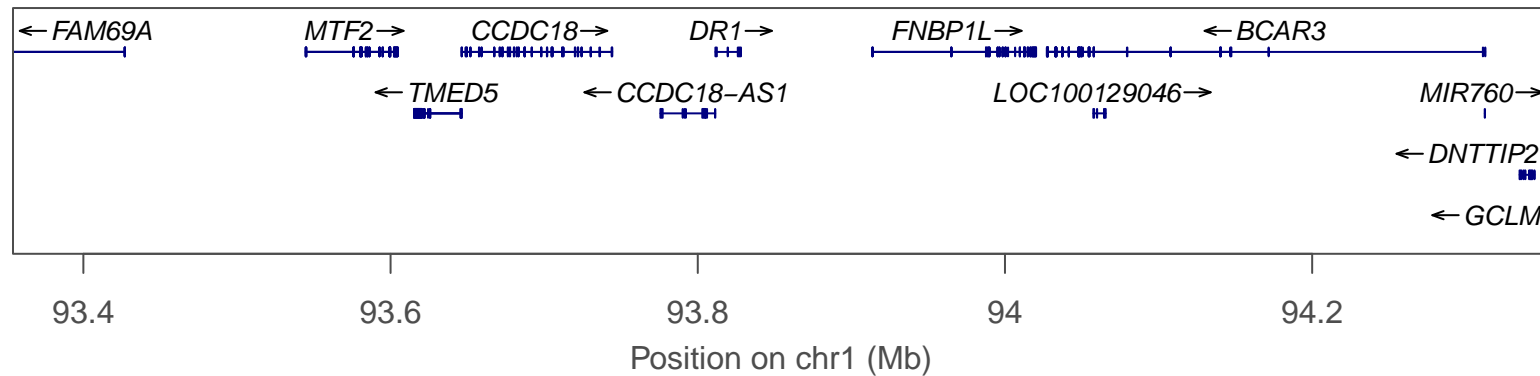



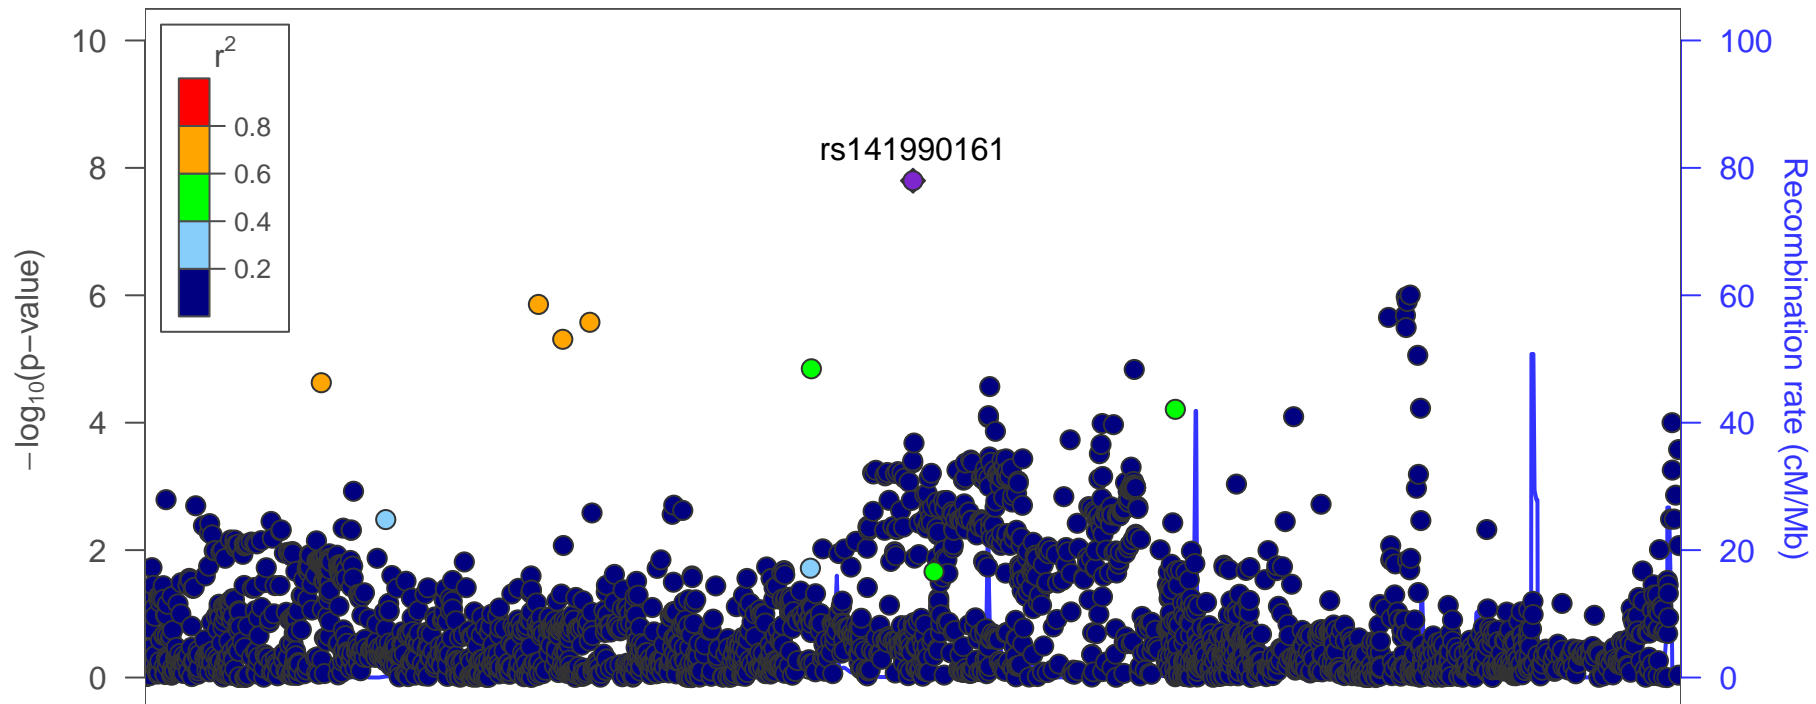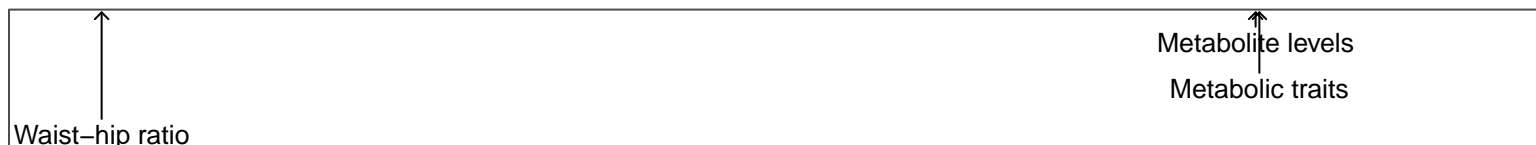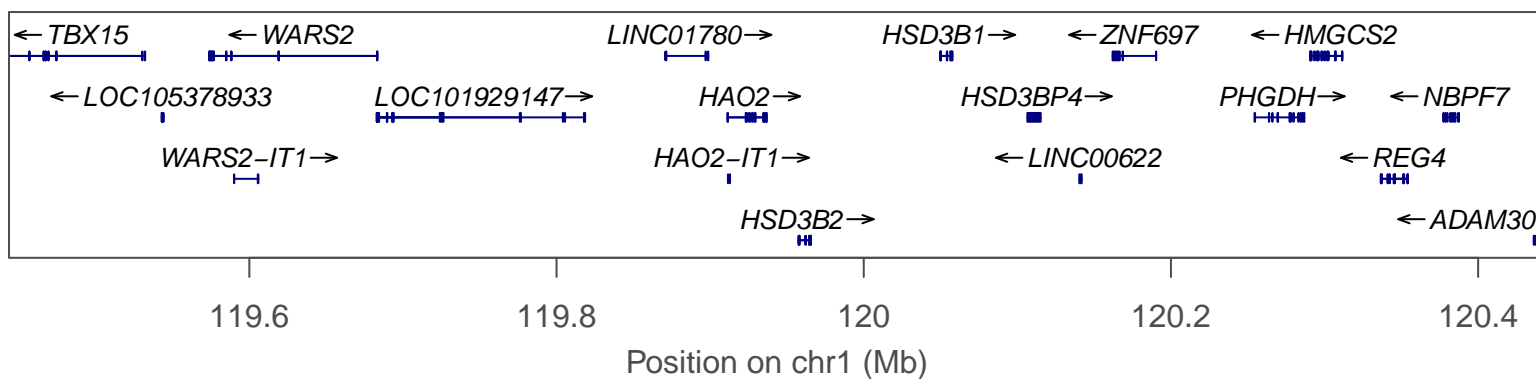

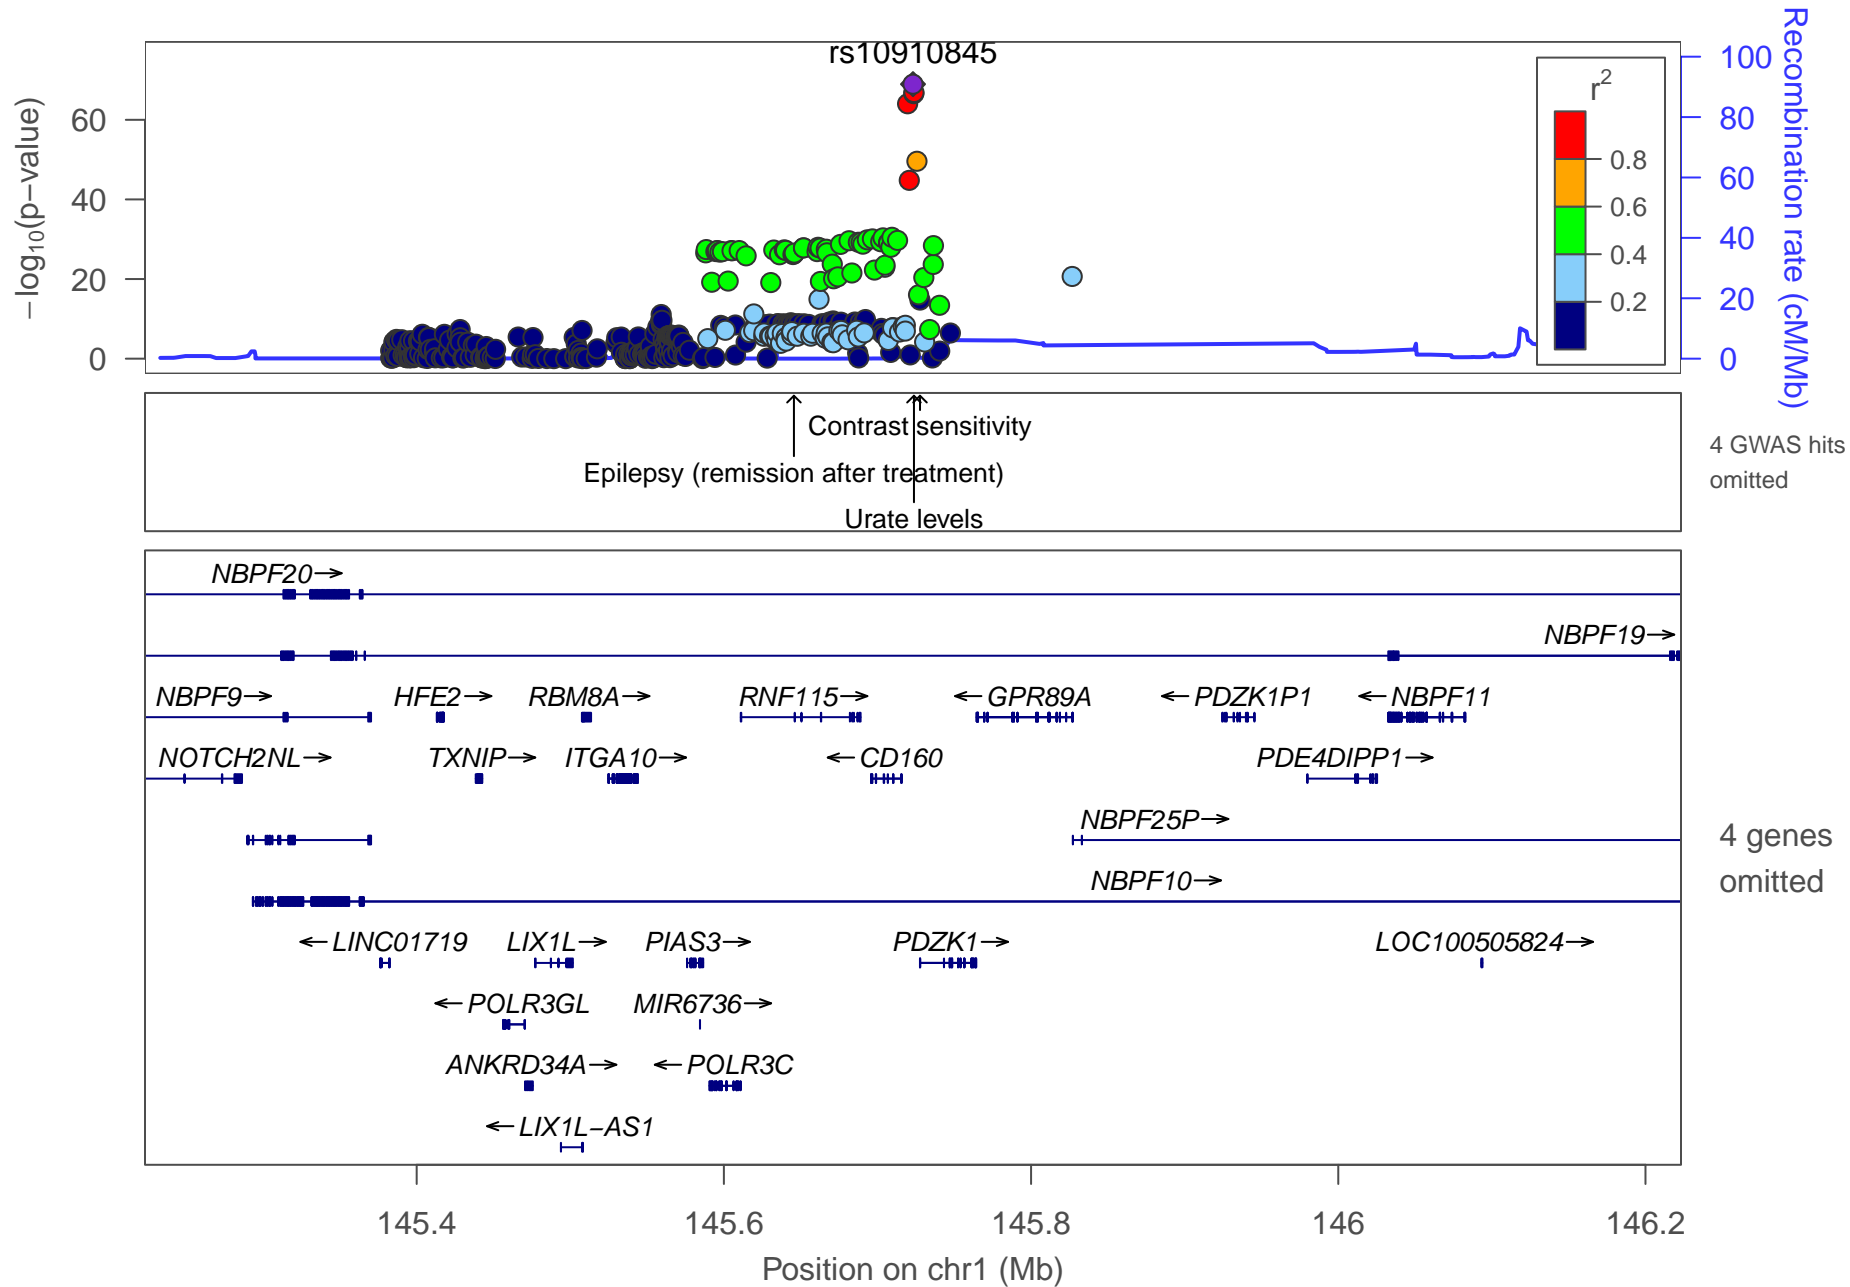

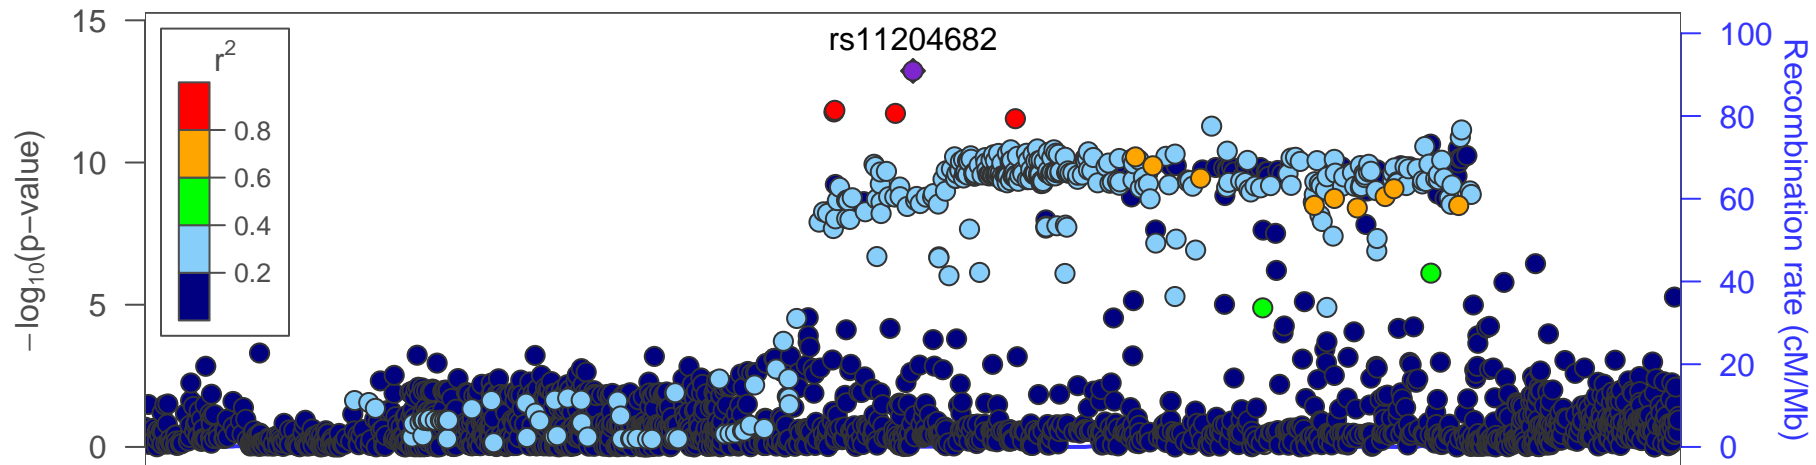

Illicit drug use ↑  
 Fat body mass ↑  
 LDL cholesterol ↑  
 Rhegmatogenous retinal detachment ↑  
 4 GWAS hits omitted  
 bit-hyperactivity disorder, bipolar disorder, major depressive disorder, and schizophrenia (combined)

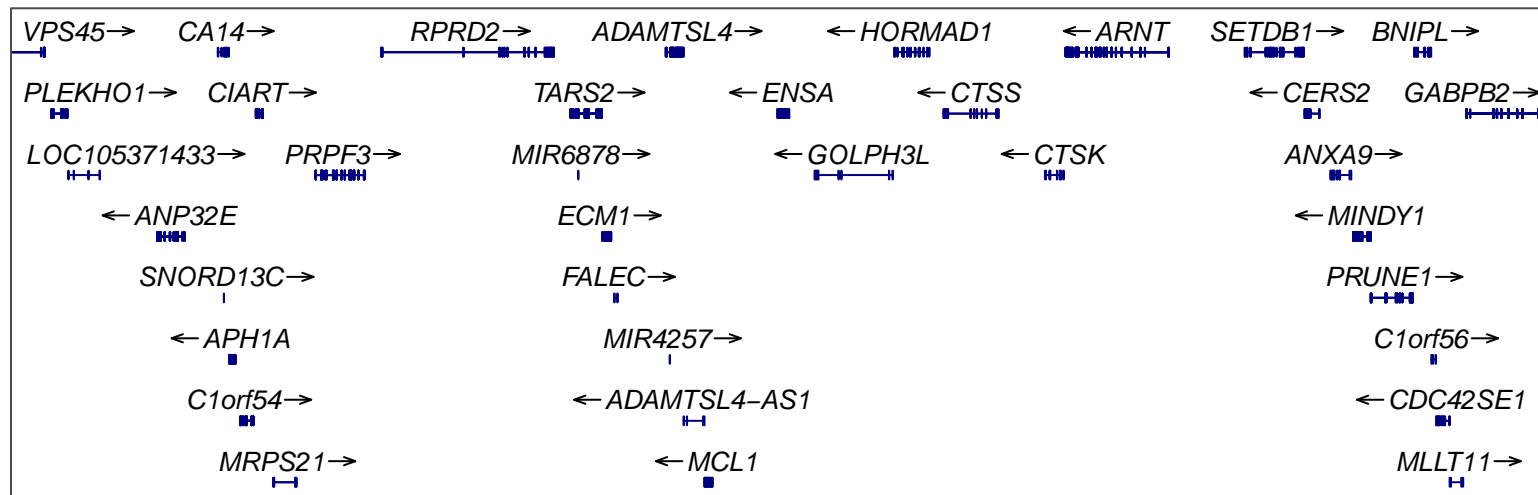

150.2                      150.4                      150.6                      150.8                      151

Position on chr1 (Mb)

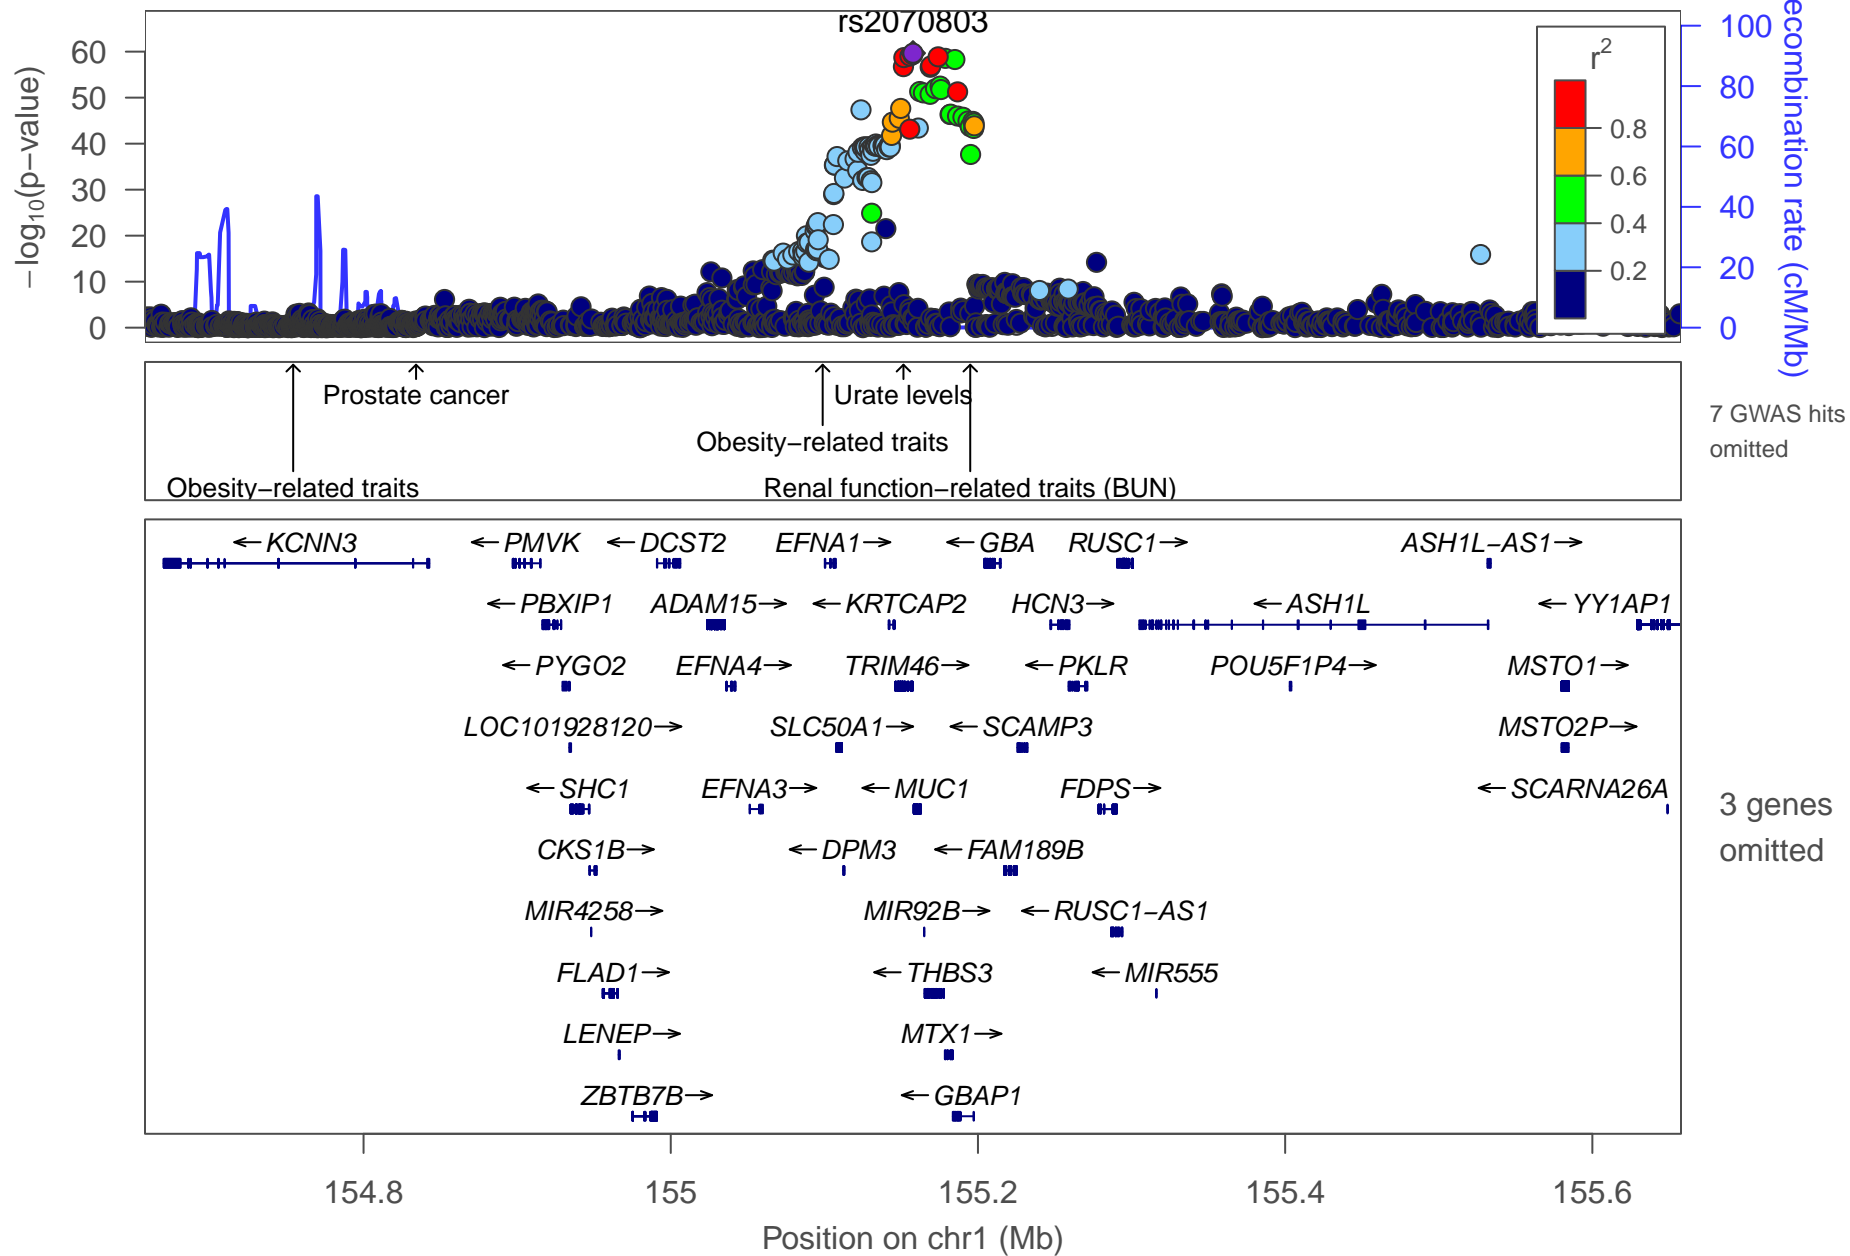

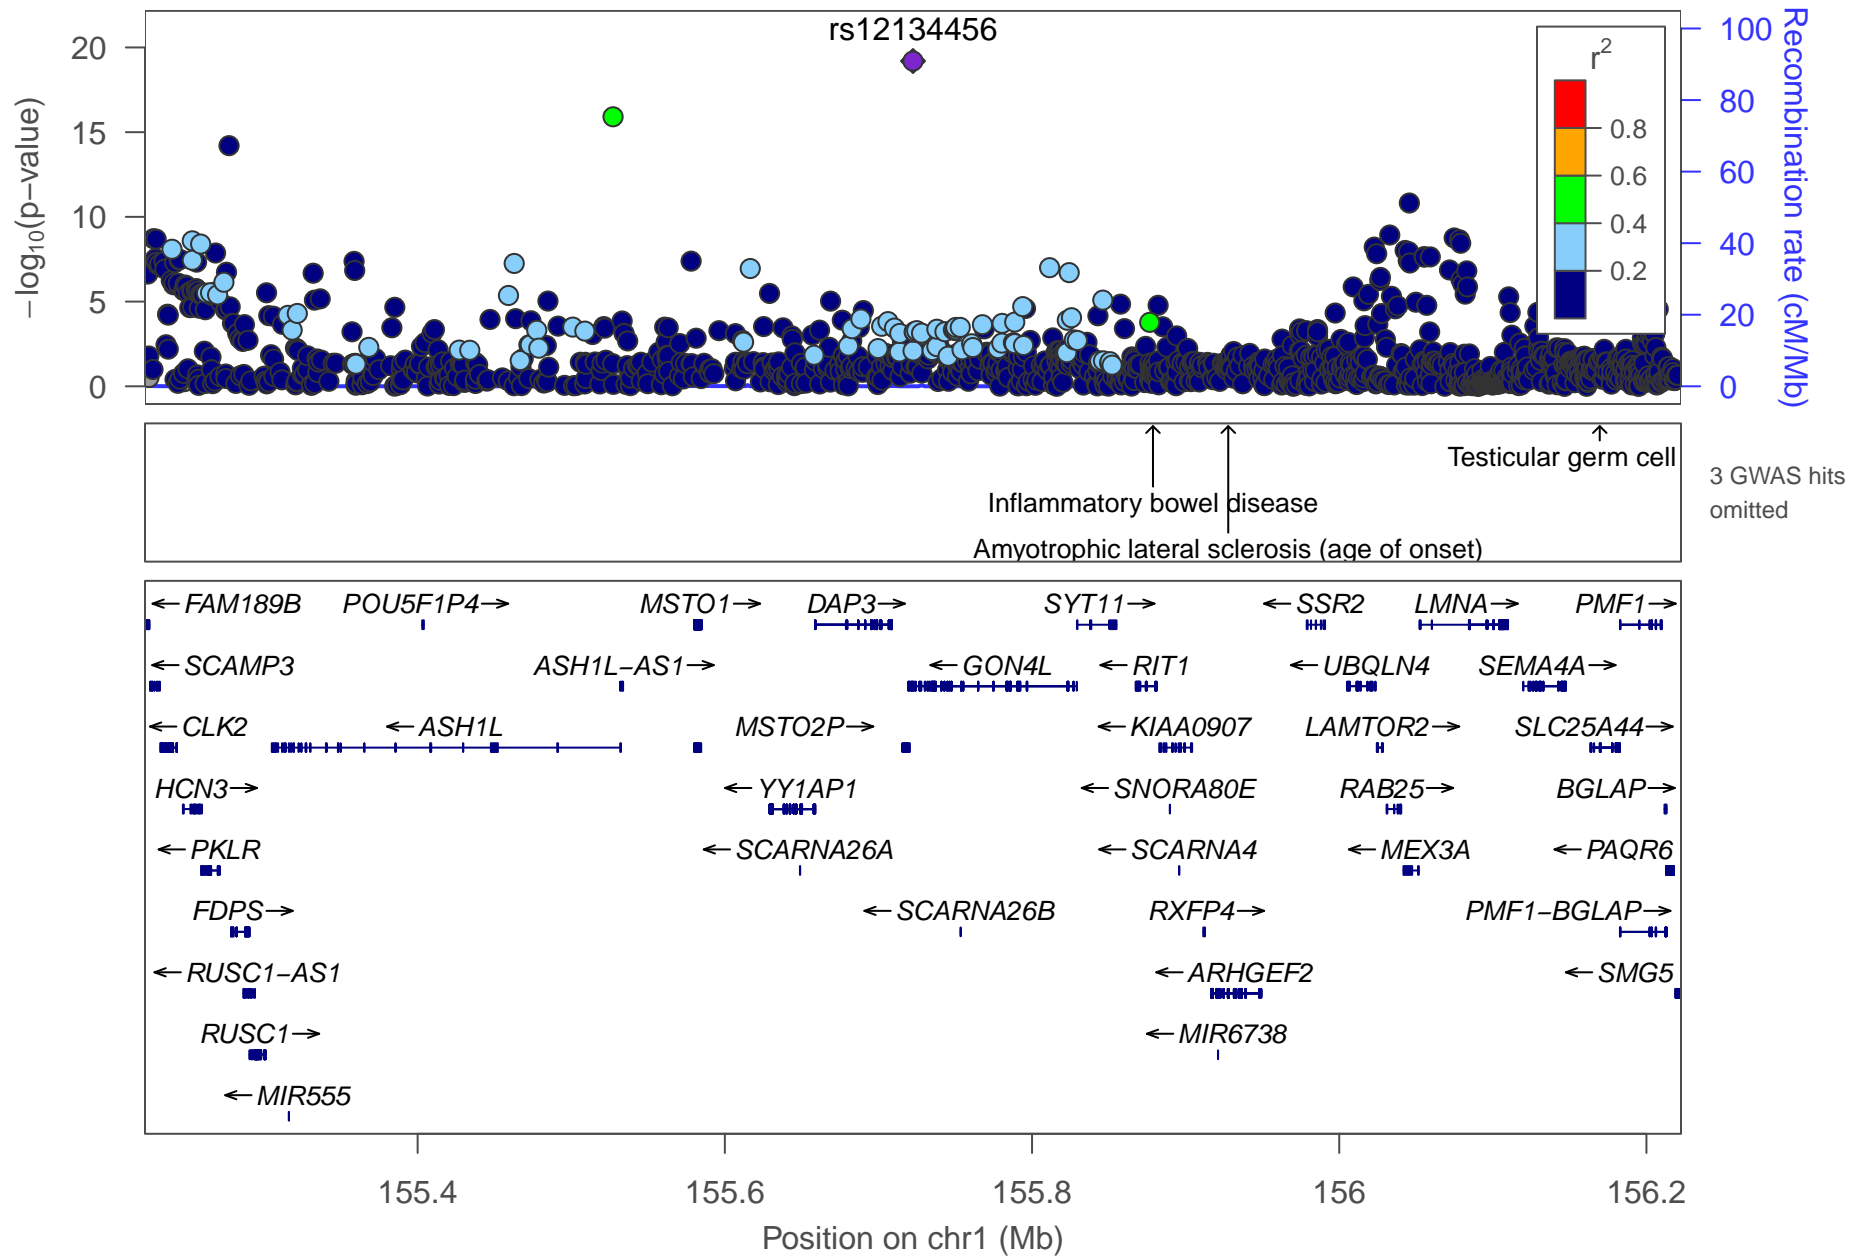

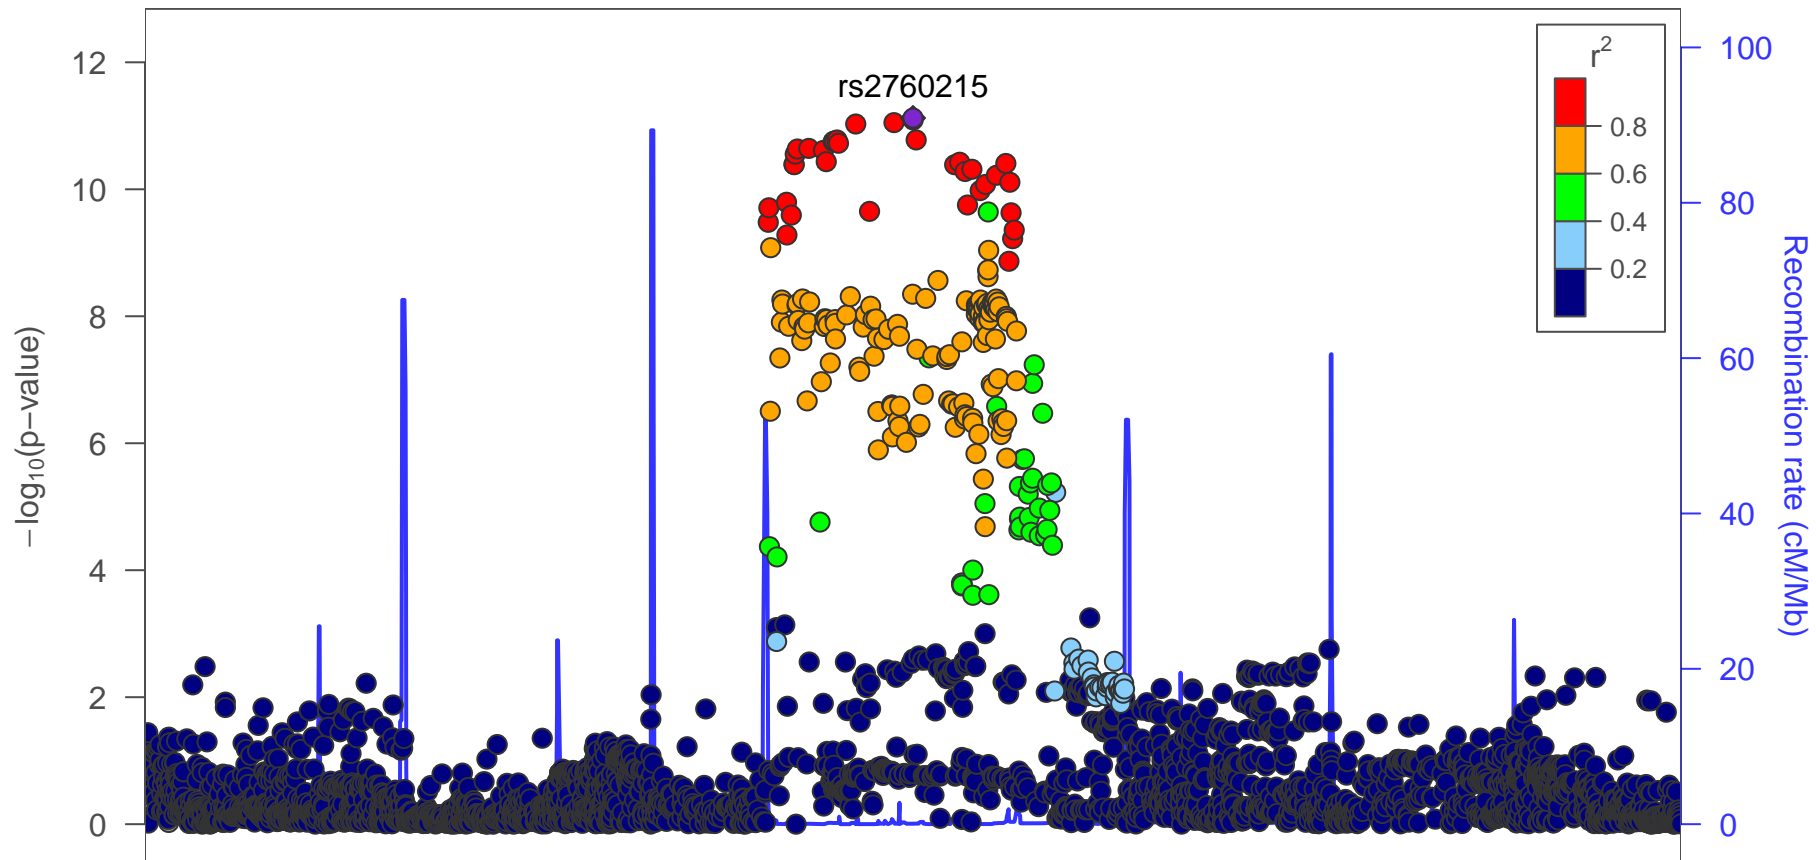

↑ Sex hormone-binding globulin levels

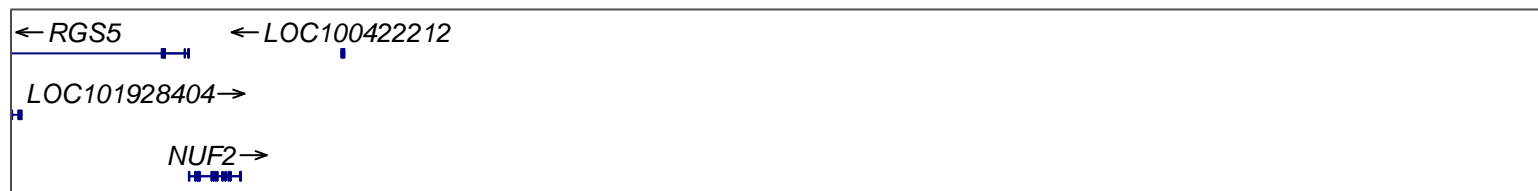

163.2                      163.4                      163.6                      163.8                      164  
 Position on chr1 (Mb)

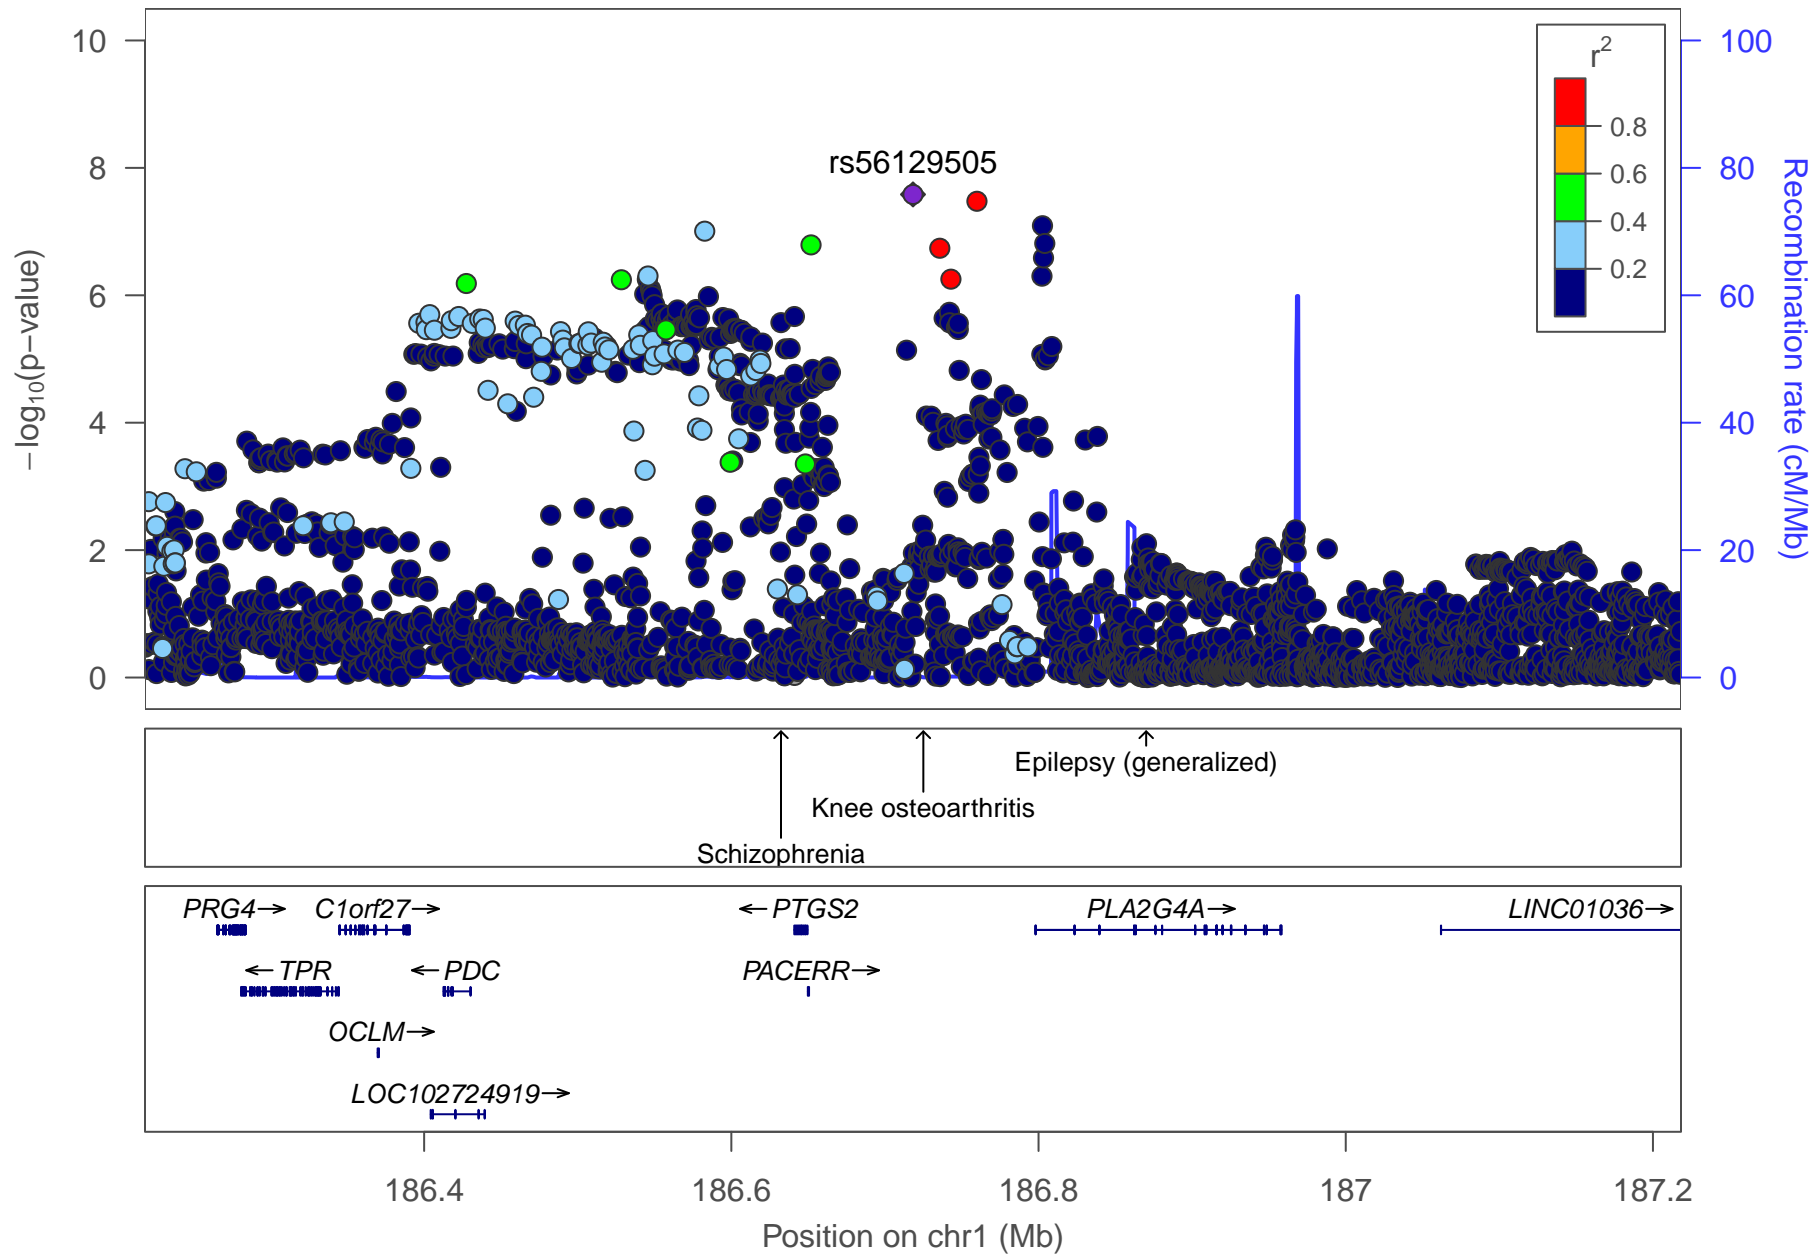

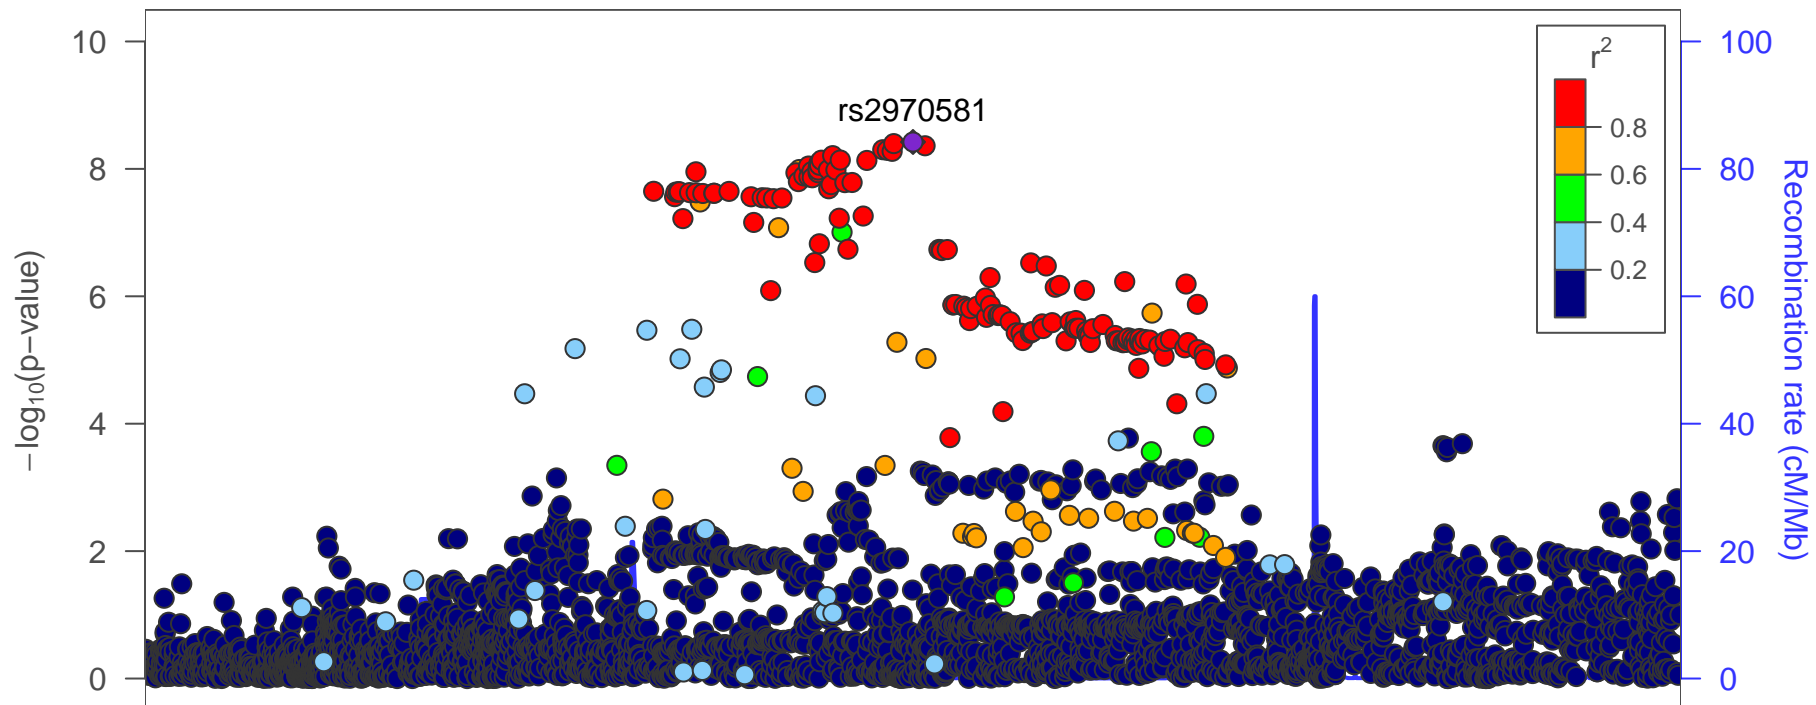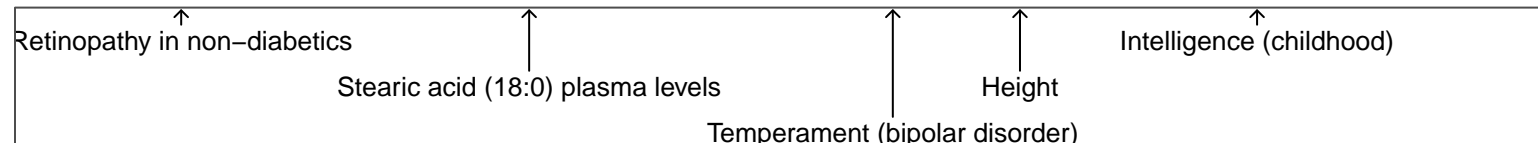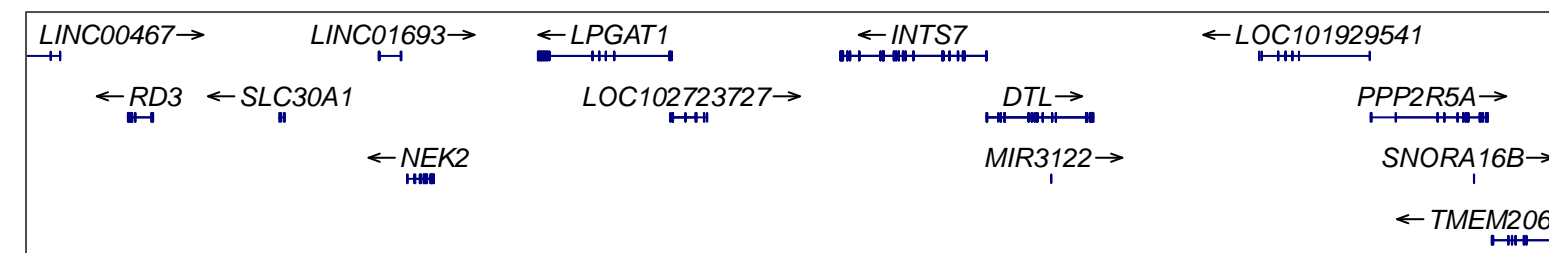

211.6

211.8

212

212.2

212.4

Position on chr1 (Mb)



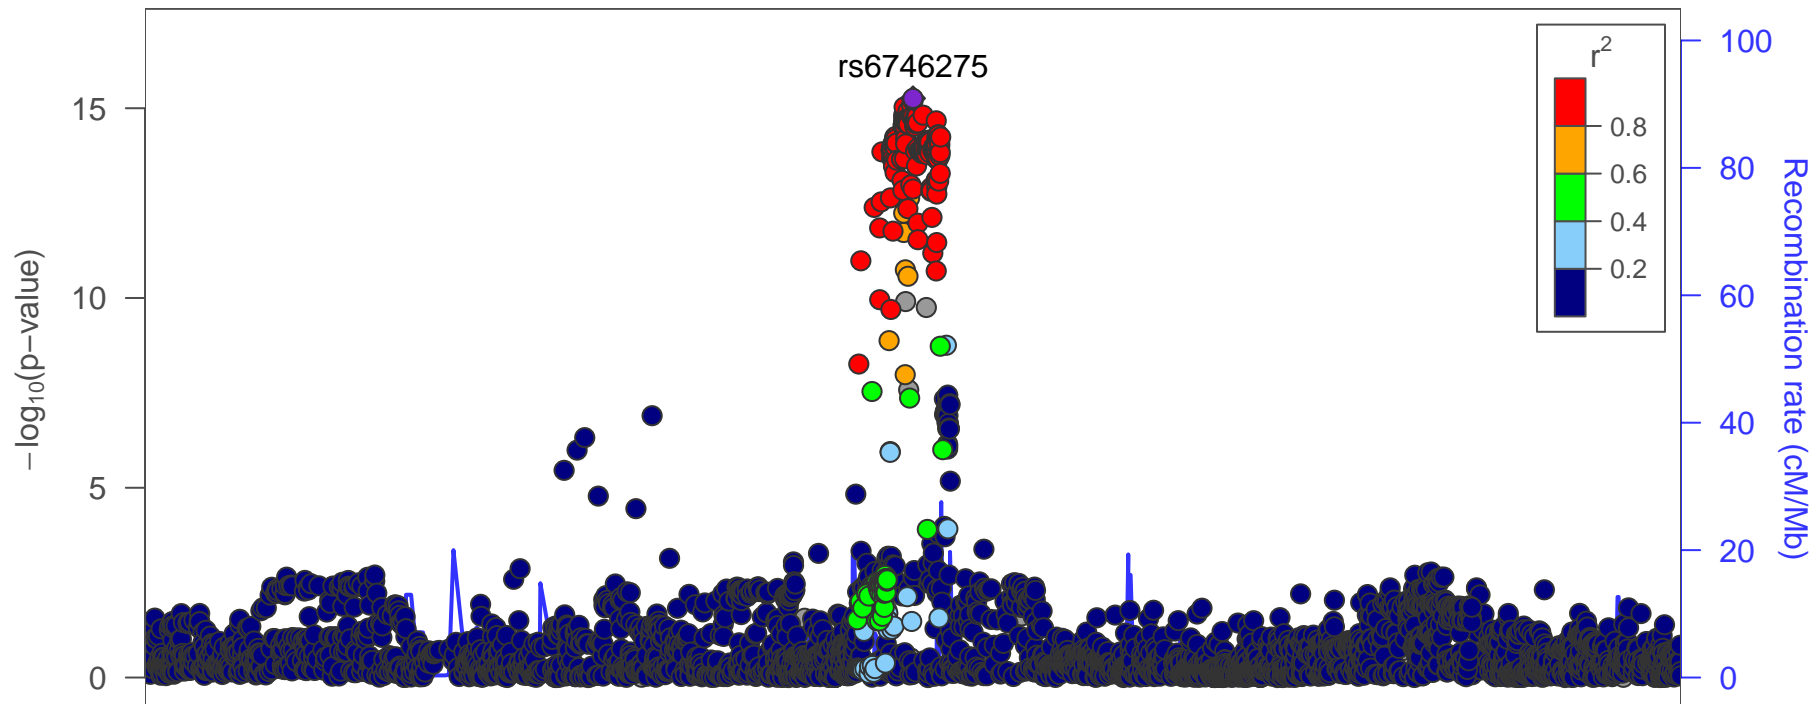

Body mass index  
 Body mass index  
 Adverse response to chemotherapy (neutropenia/leucopenia) (doxorubicin)

13 GWAS hits omitted

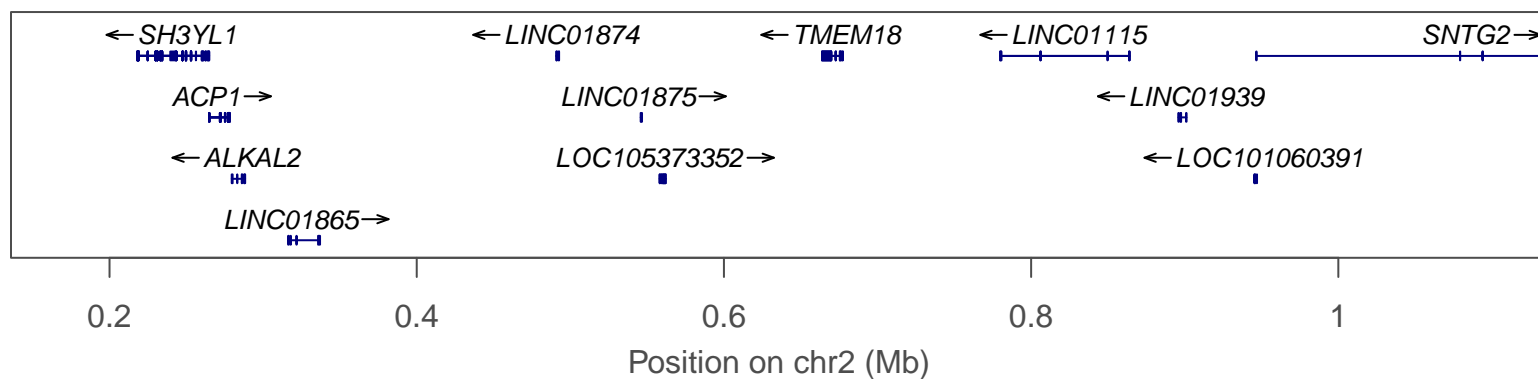

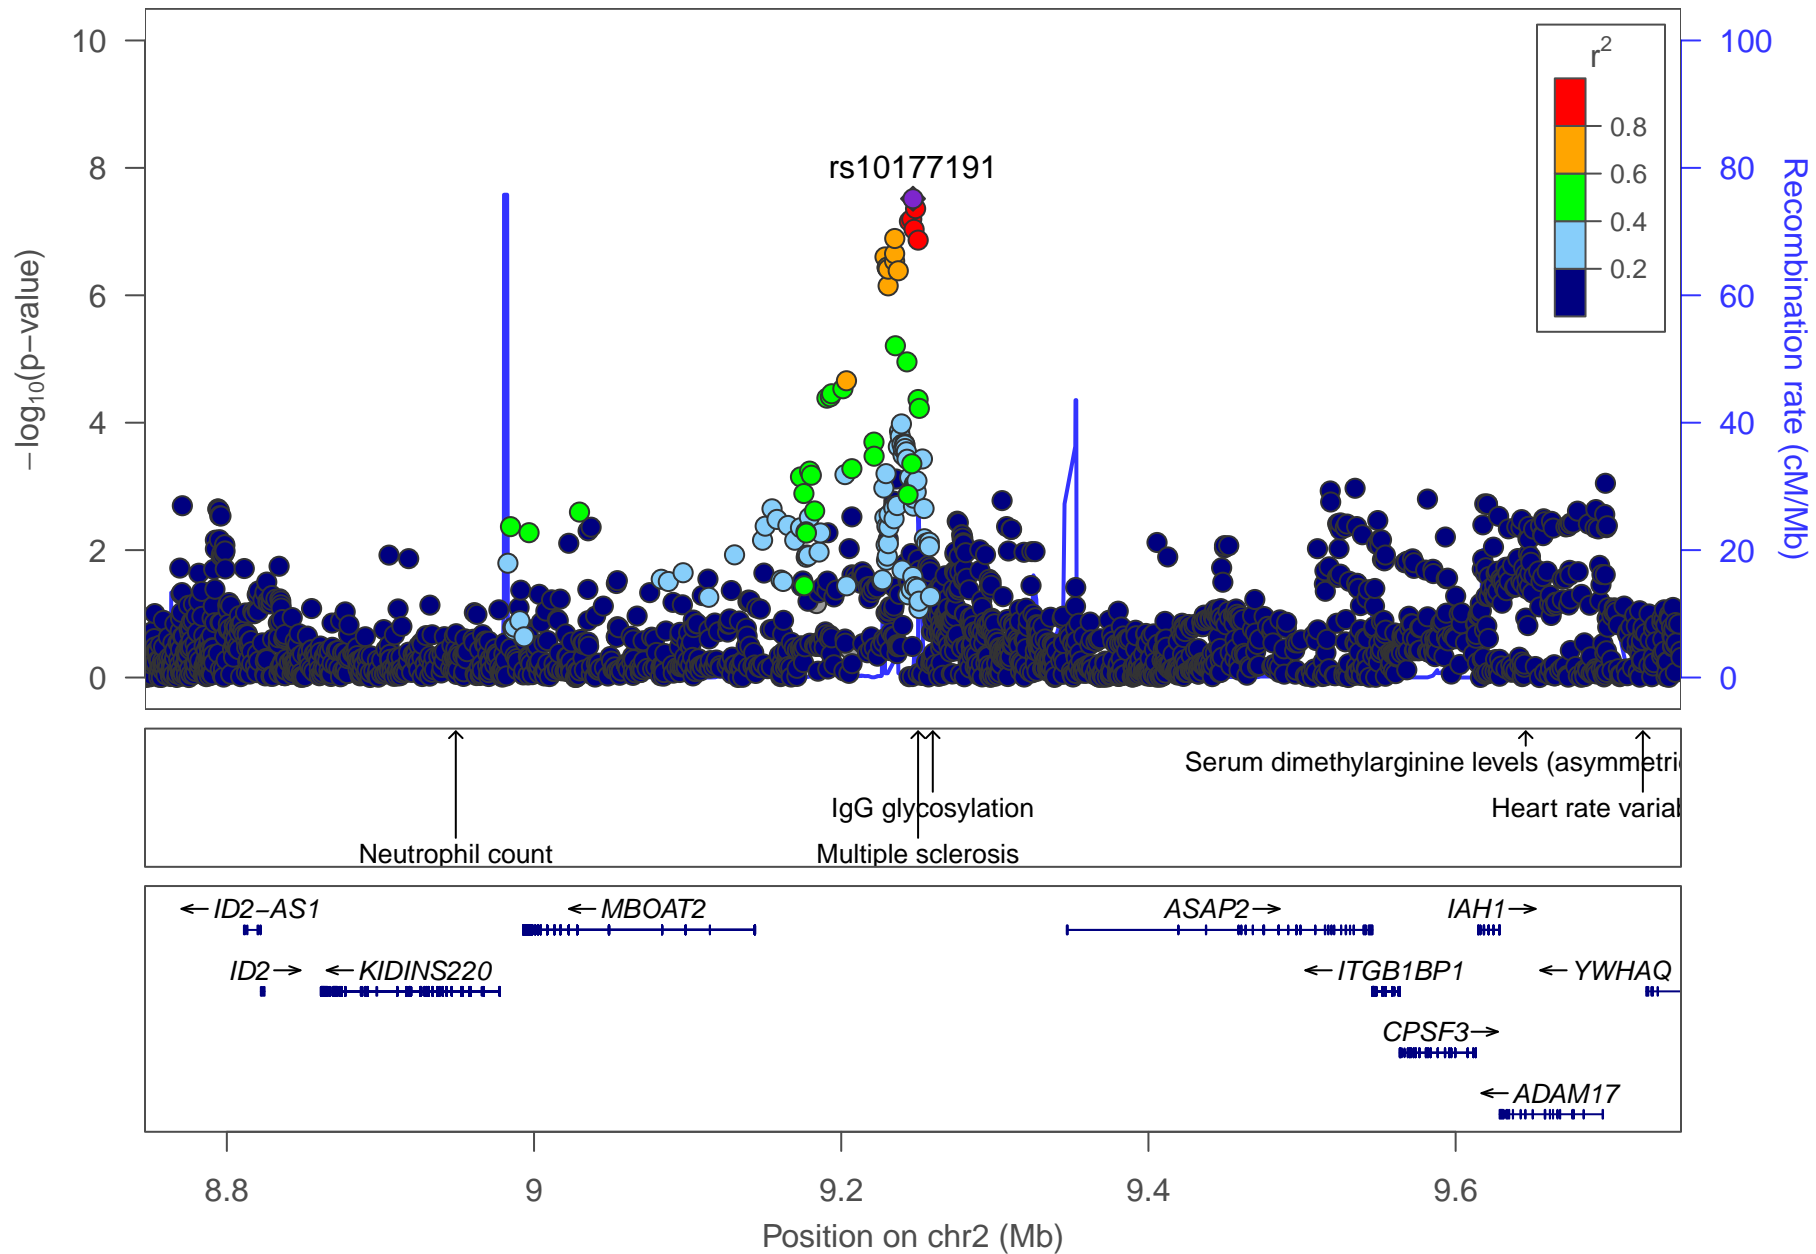

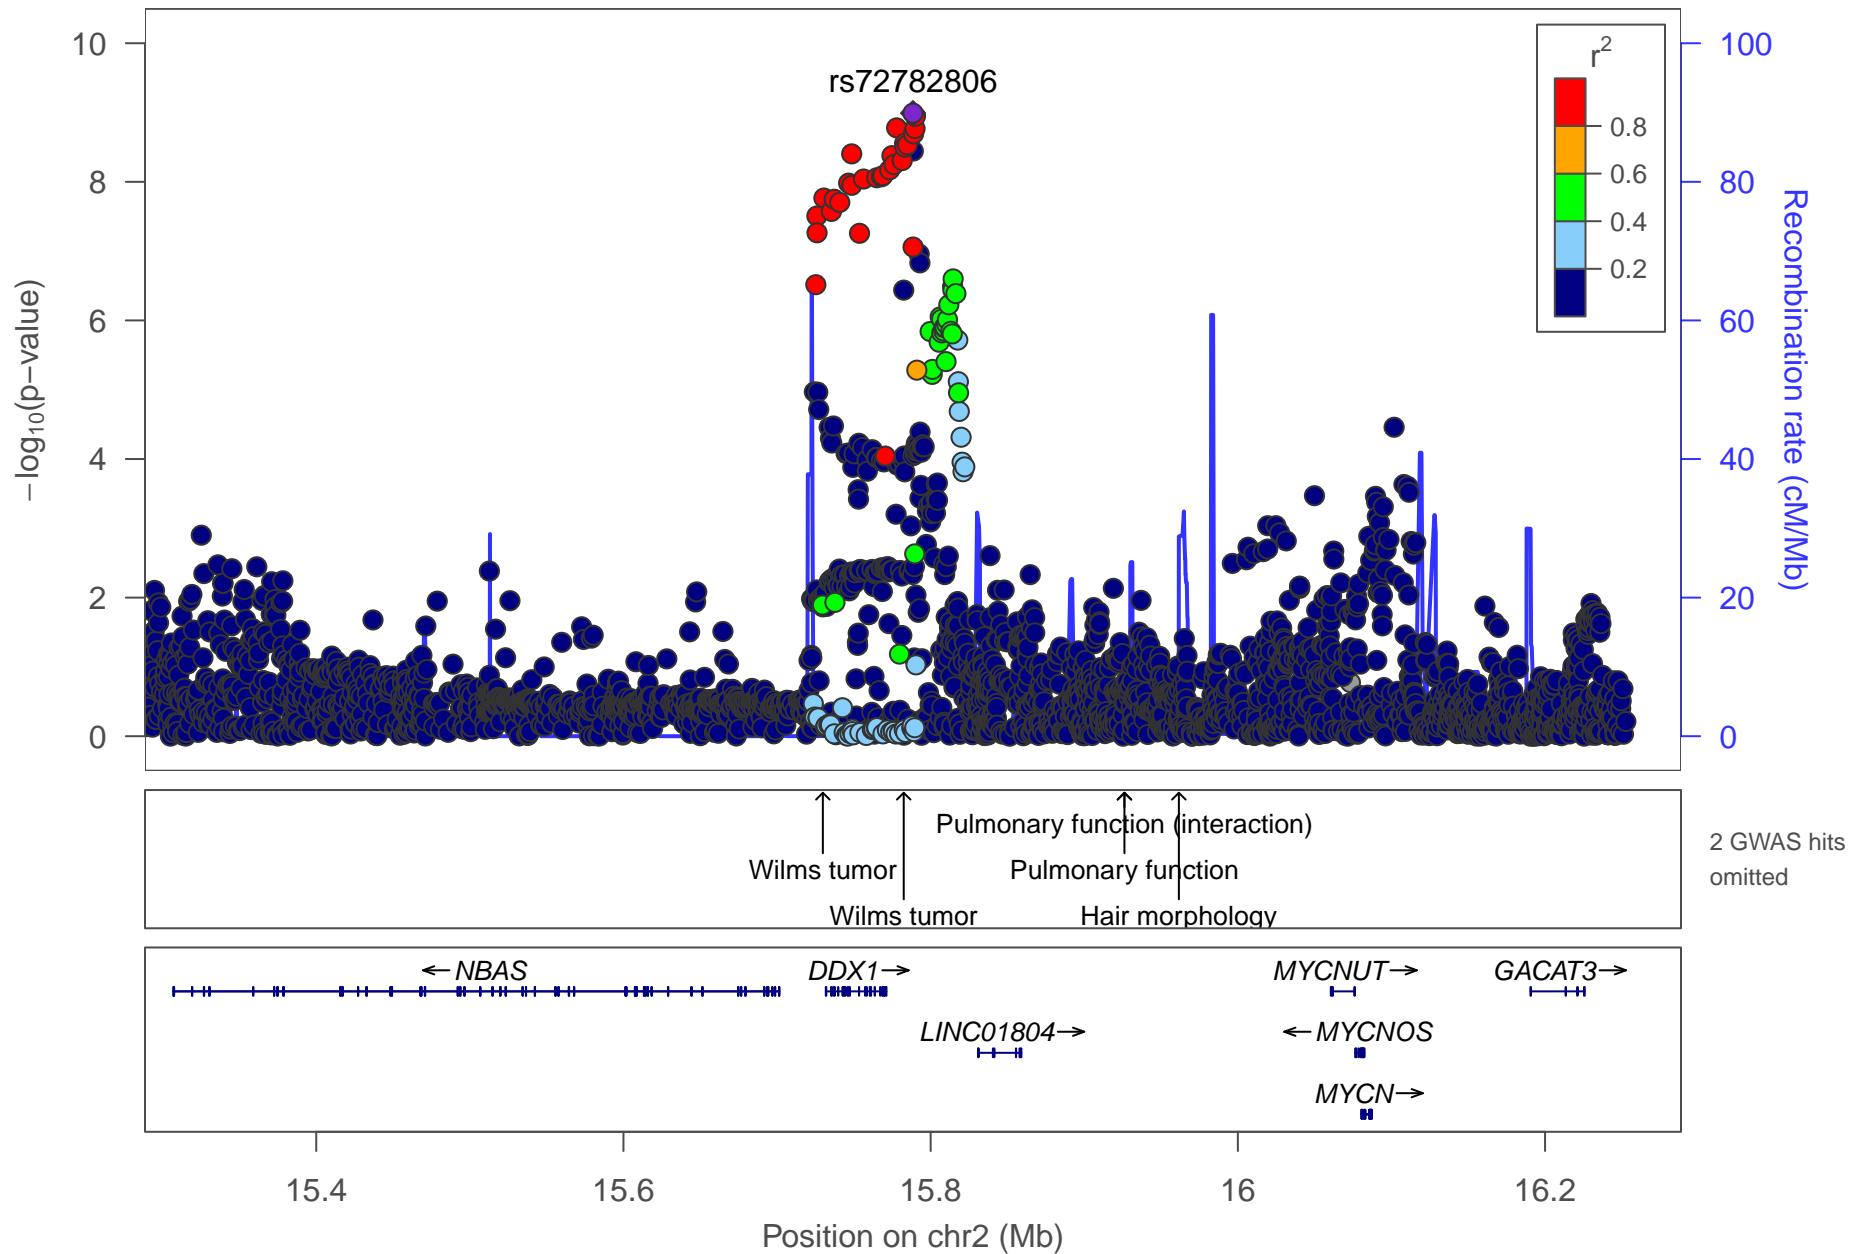

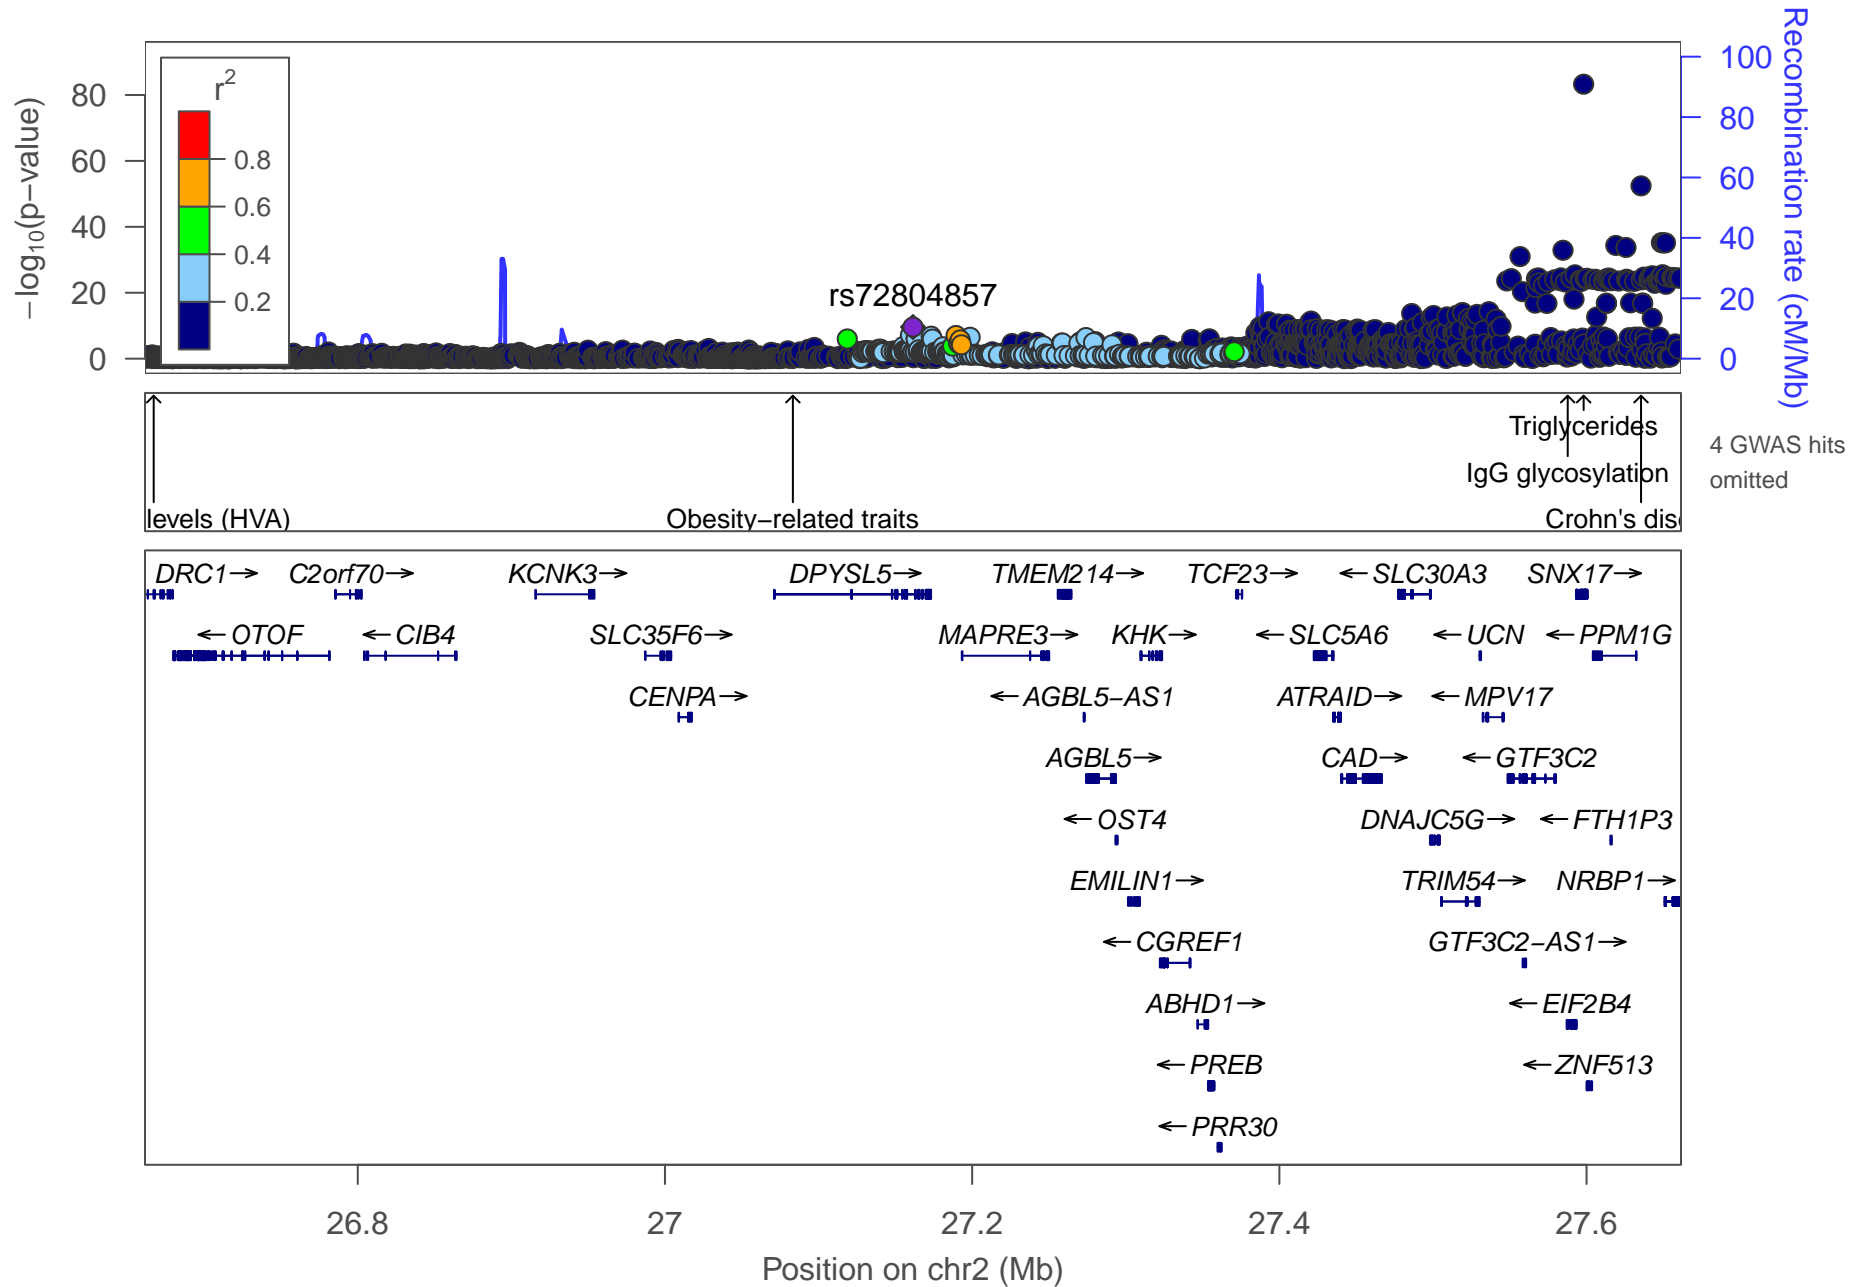

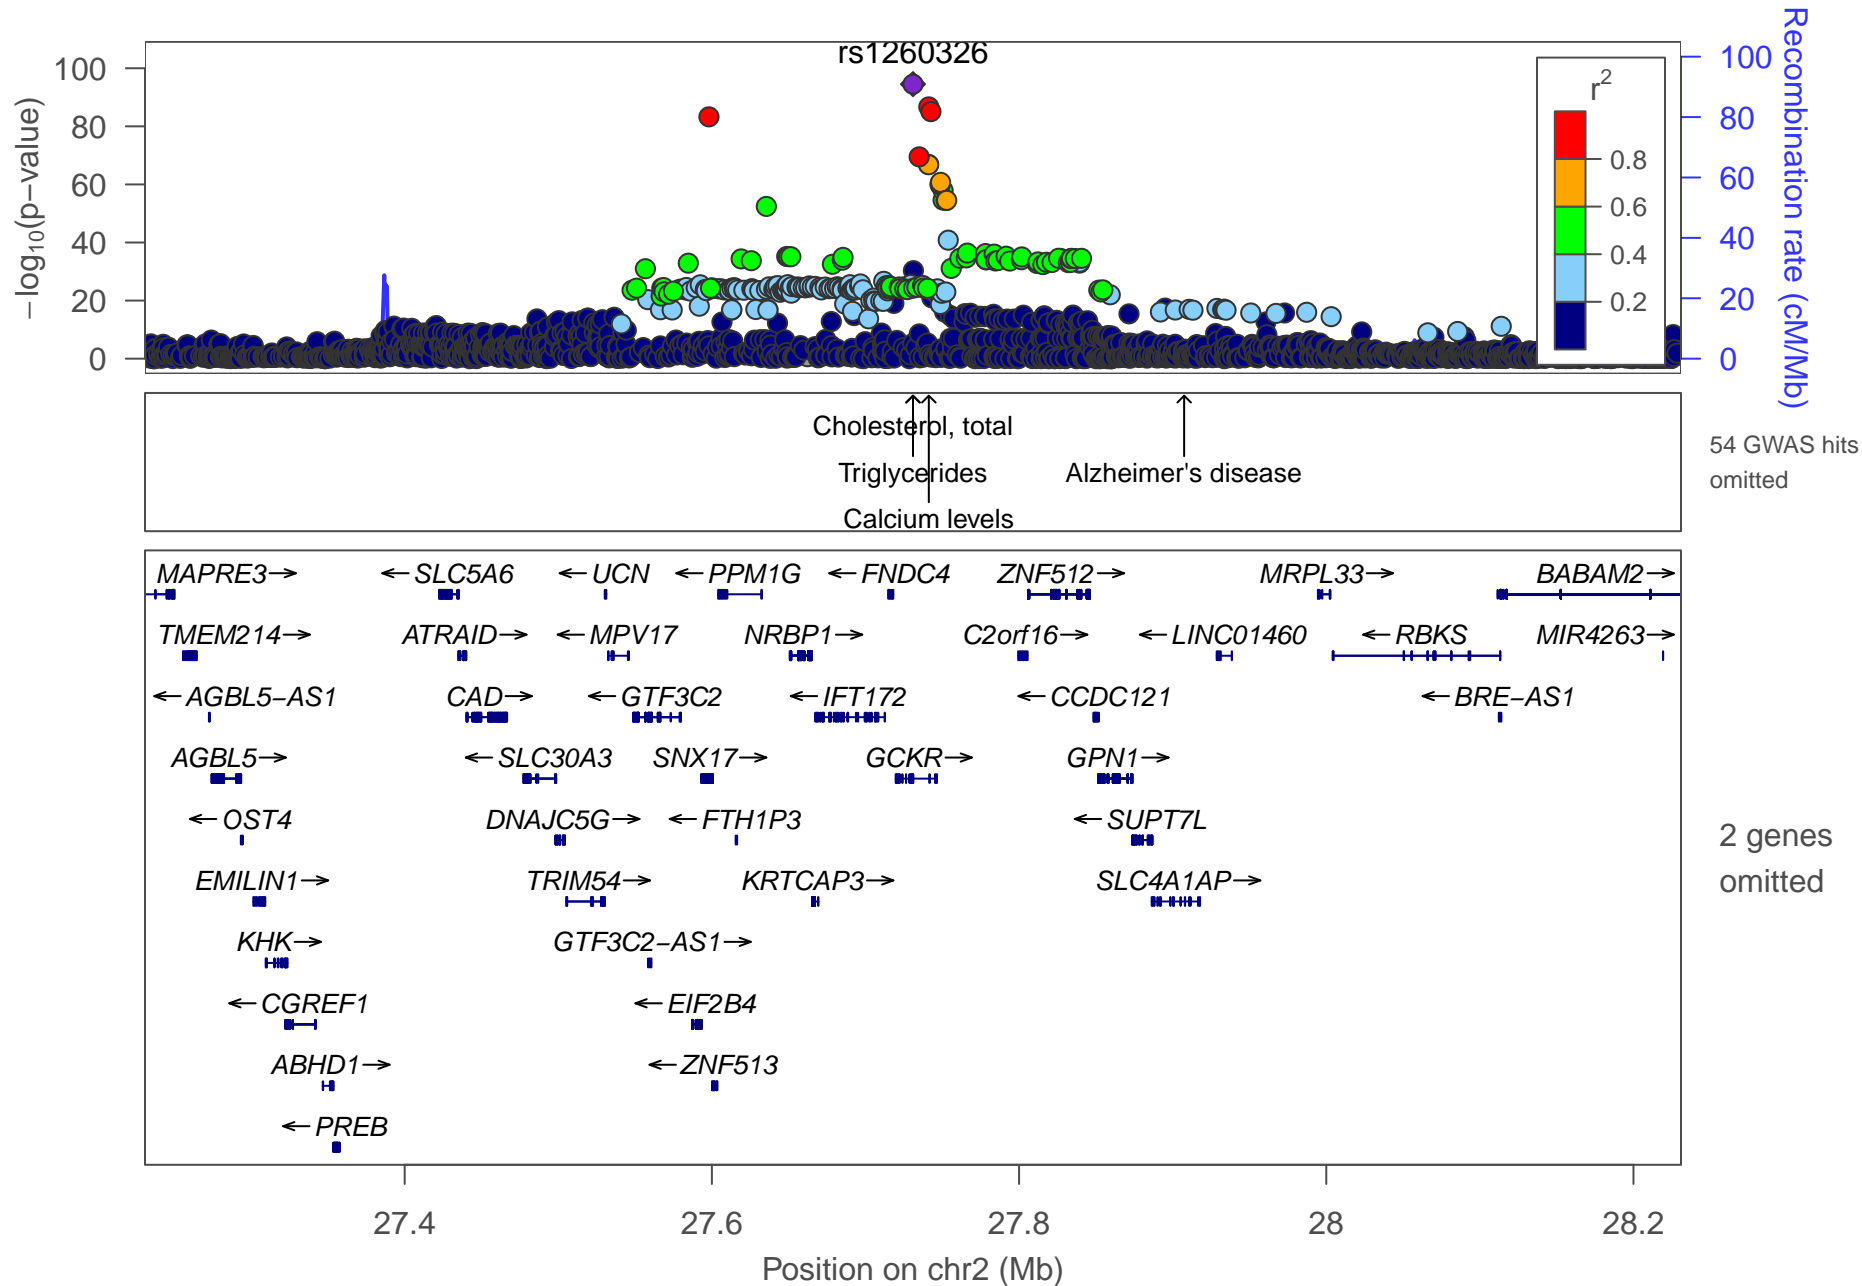

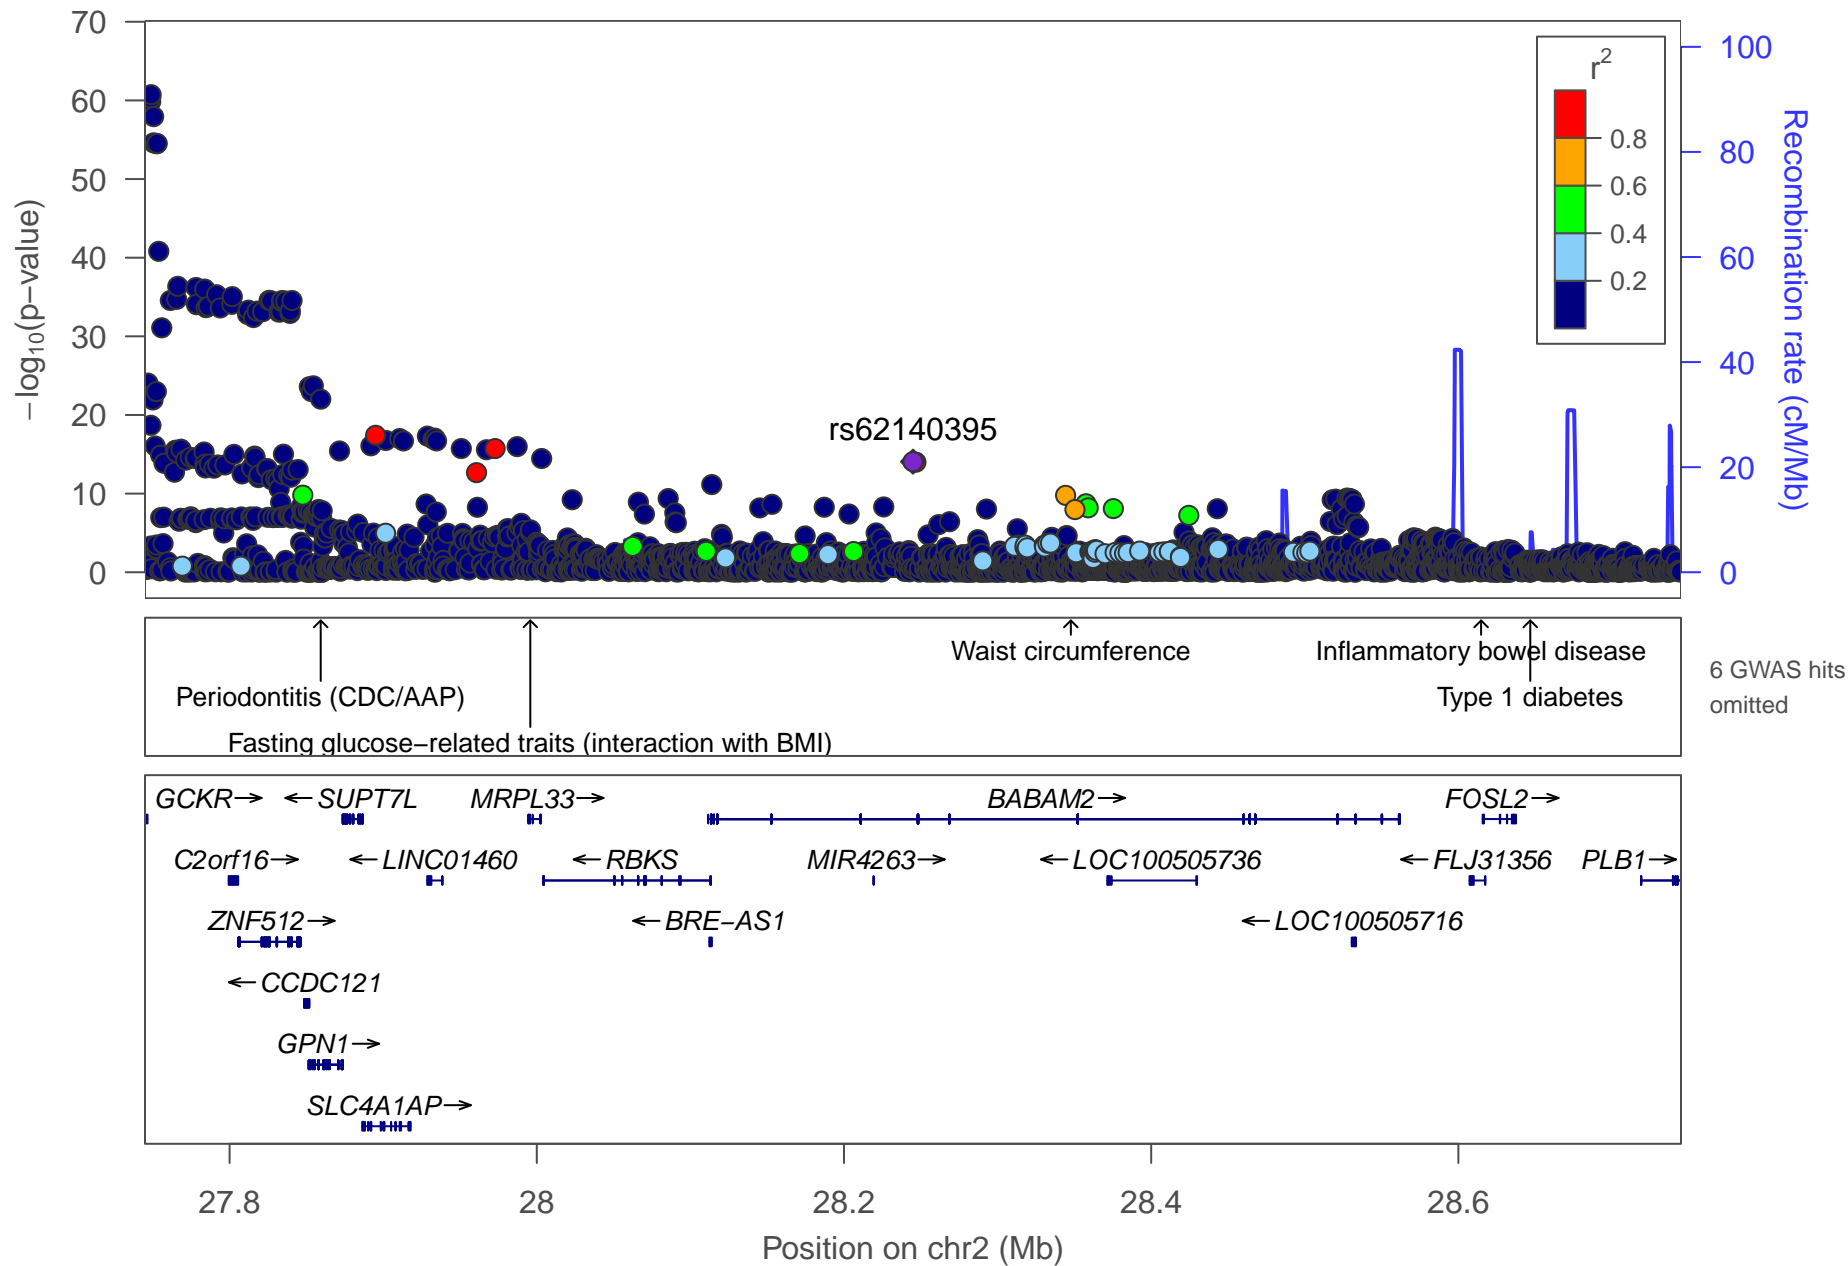

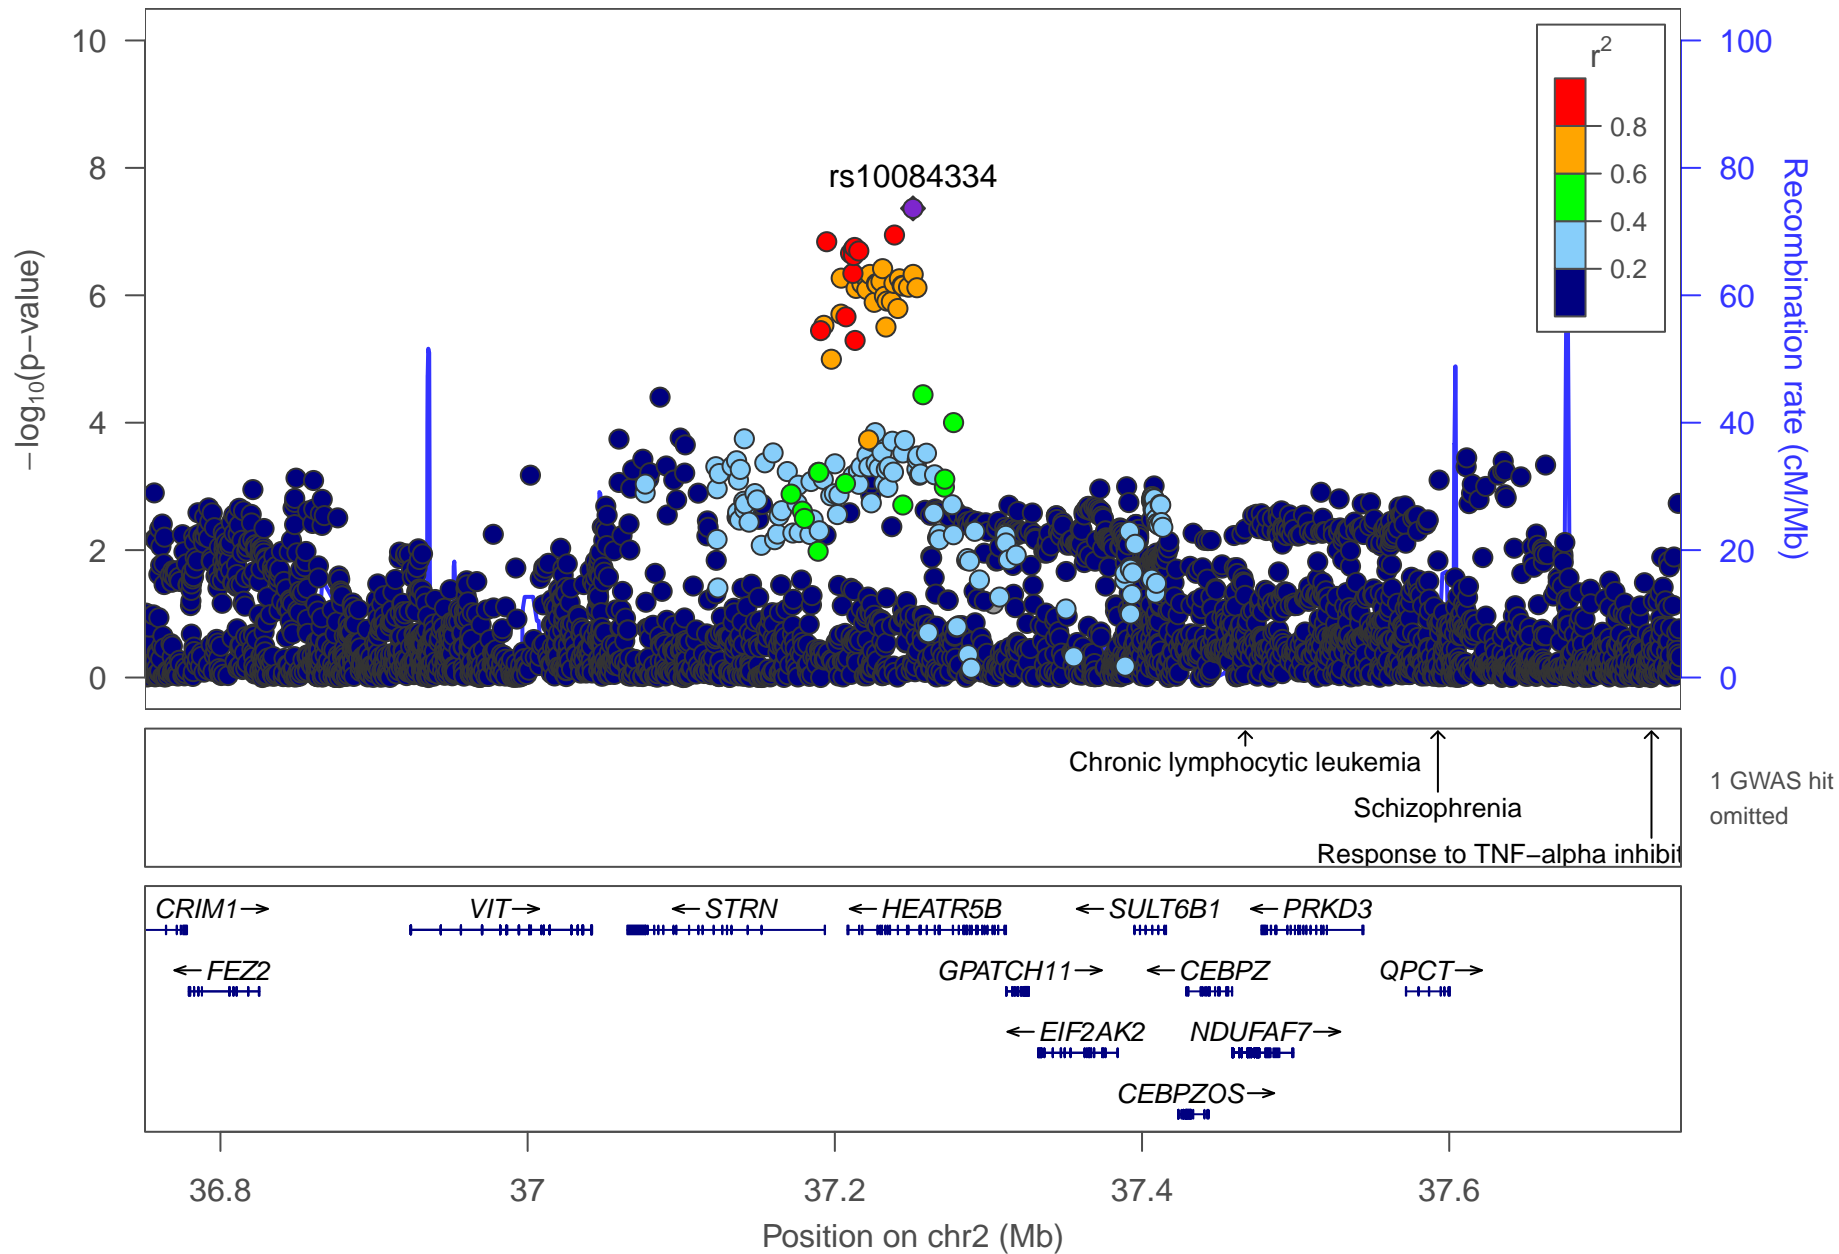

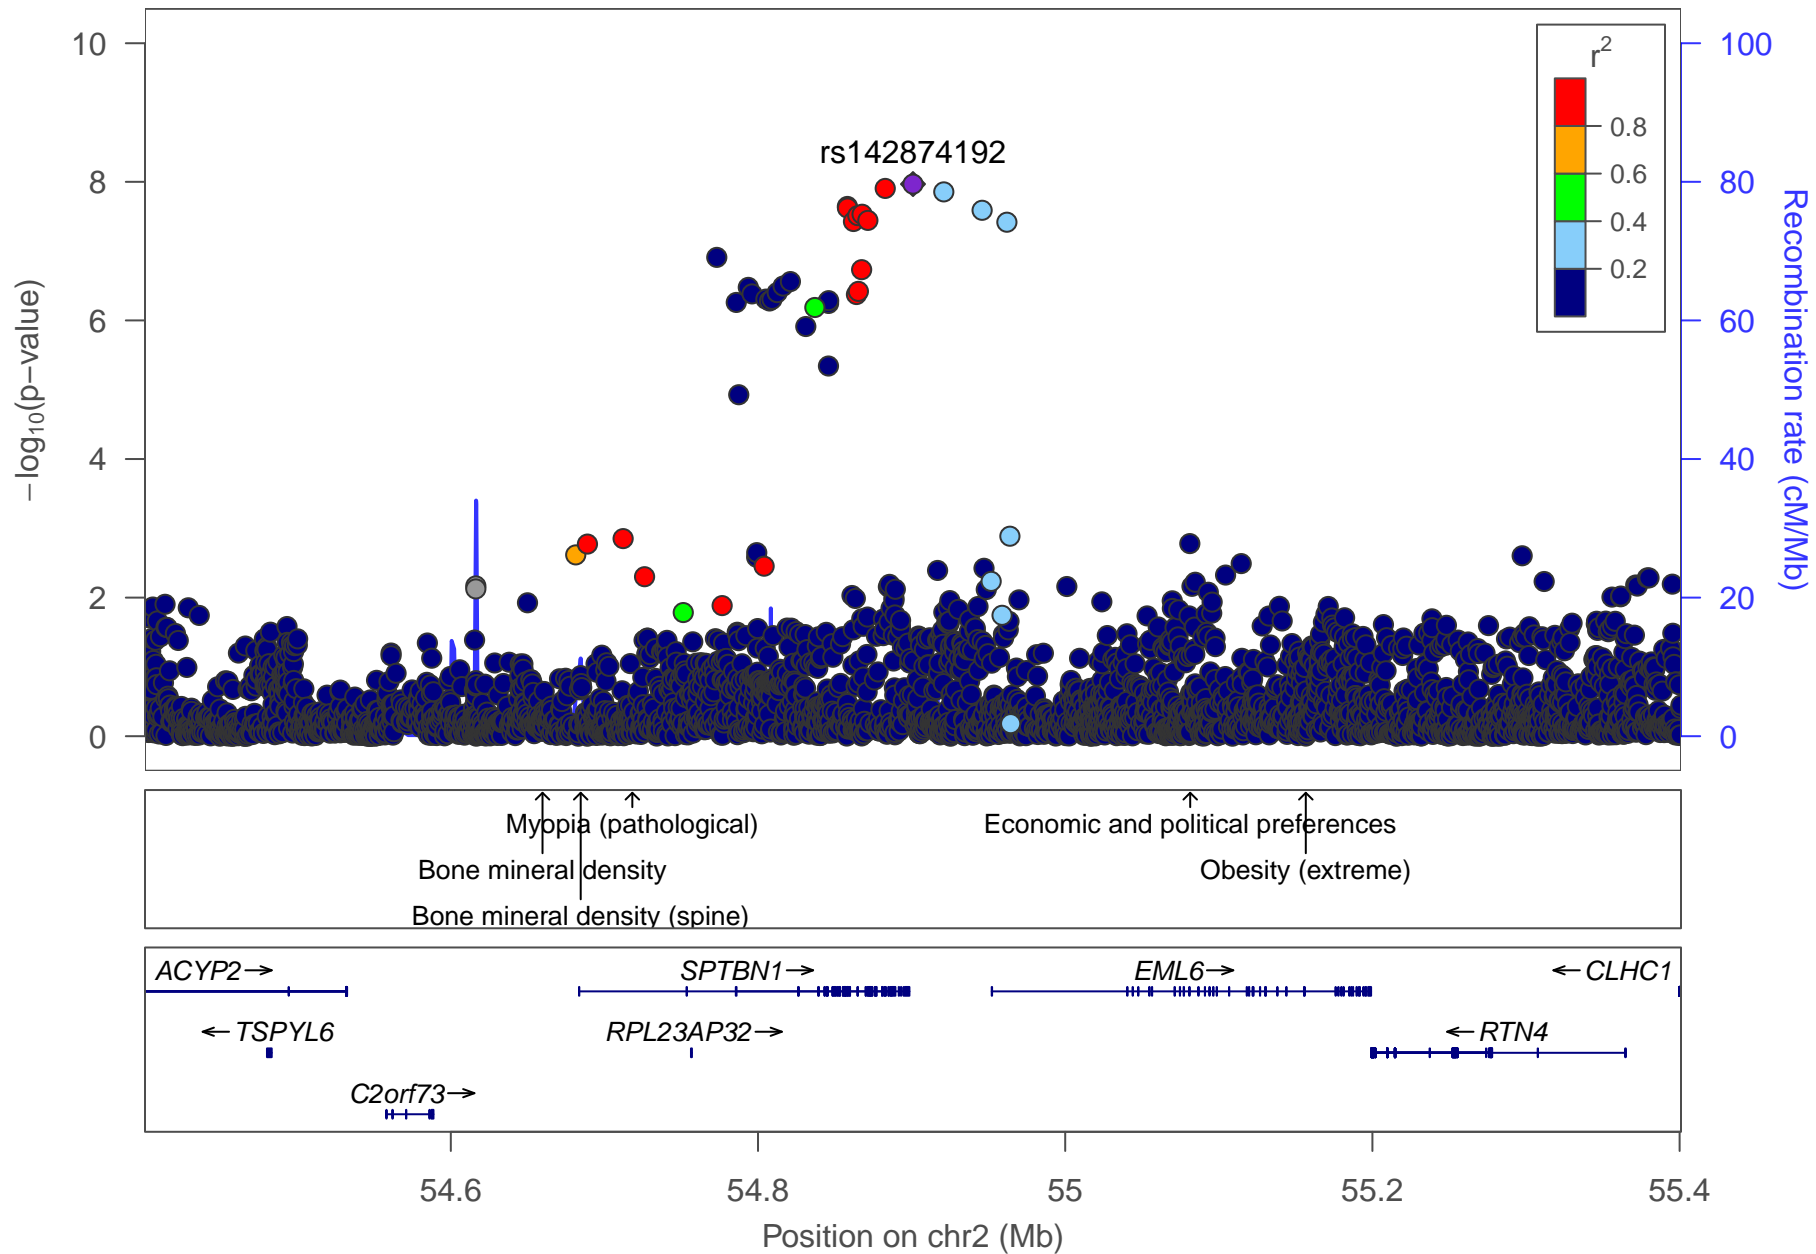



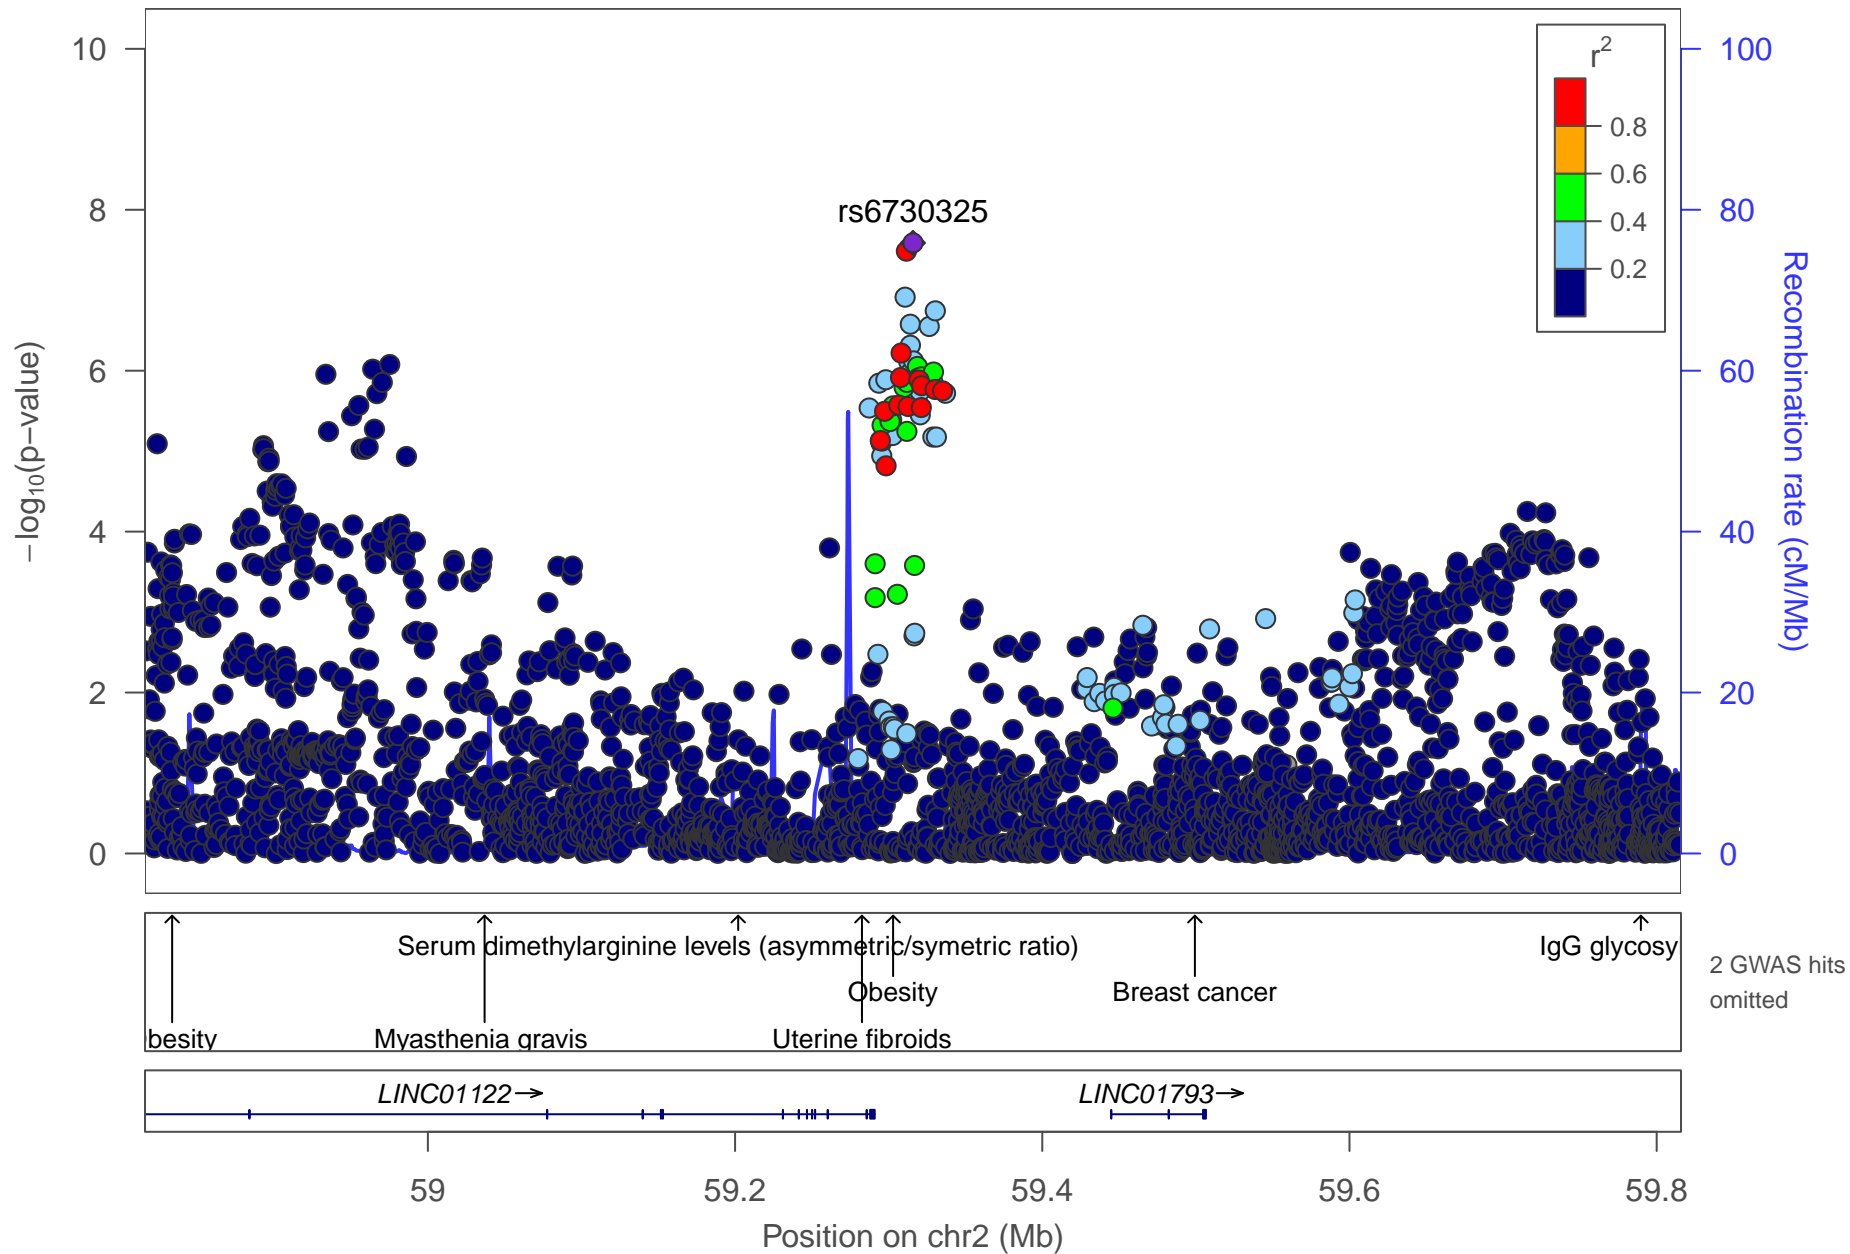

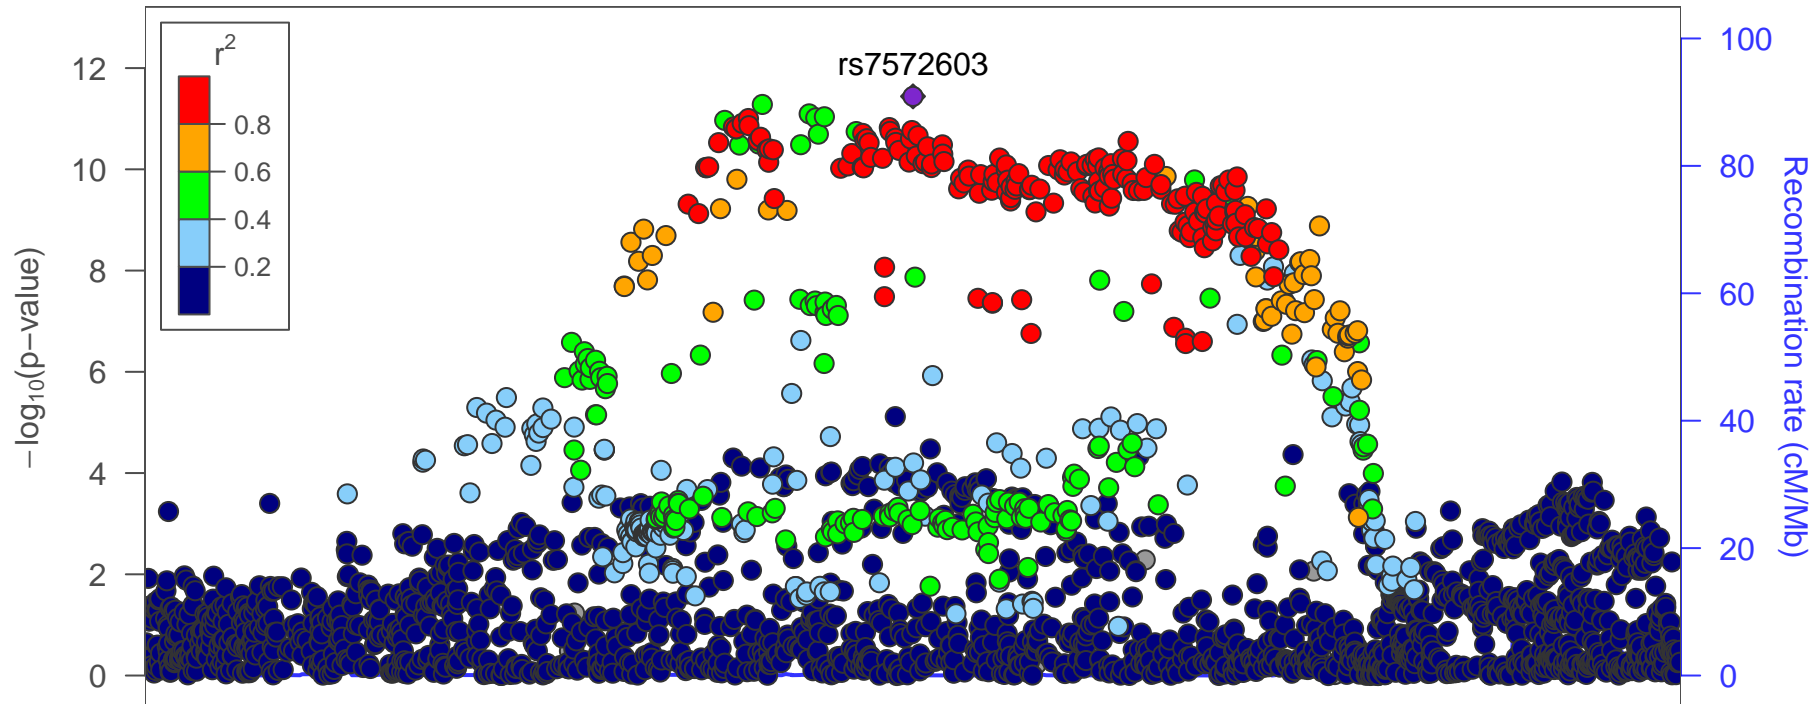

↑ s lymphoma  
 ↑ Inflammatory bowel disease  
 Homeostasis model assessment of beta-cell function (HOMA- $\beta$ )  
 ↑ Tuberculosis

12 GWAS hits omitted

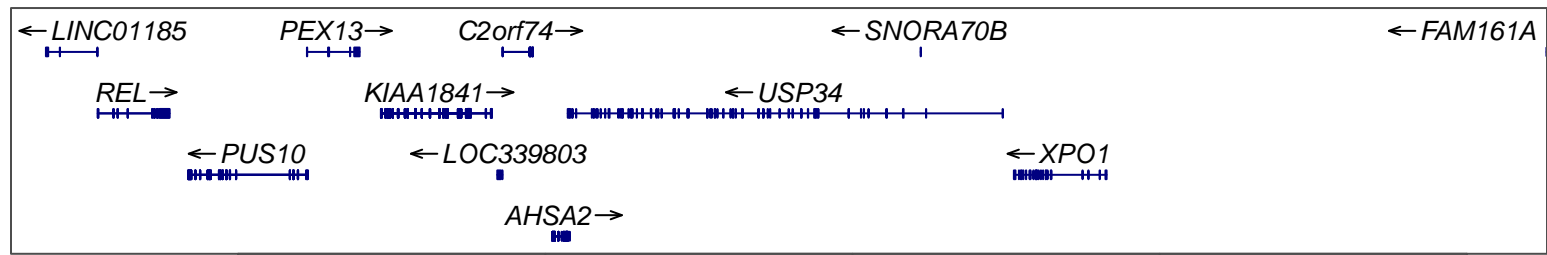

61.2                      61.4                      61.6                      61.8                      62  
 Position on chr2 (Mb)

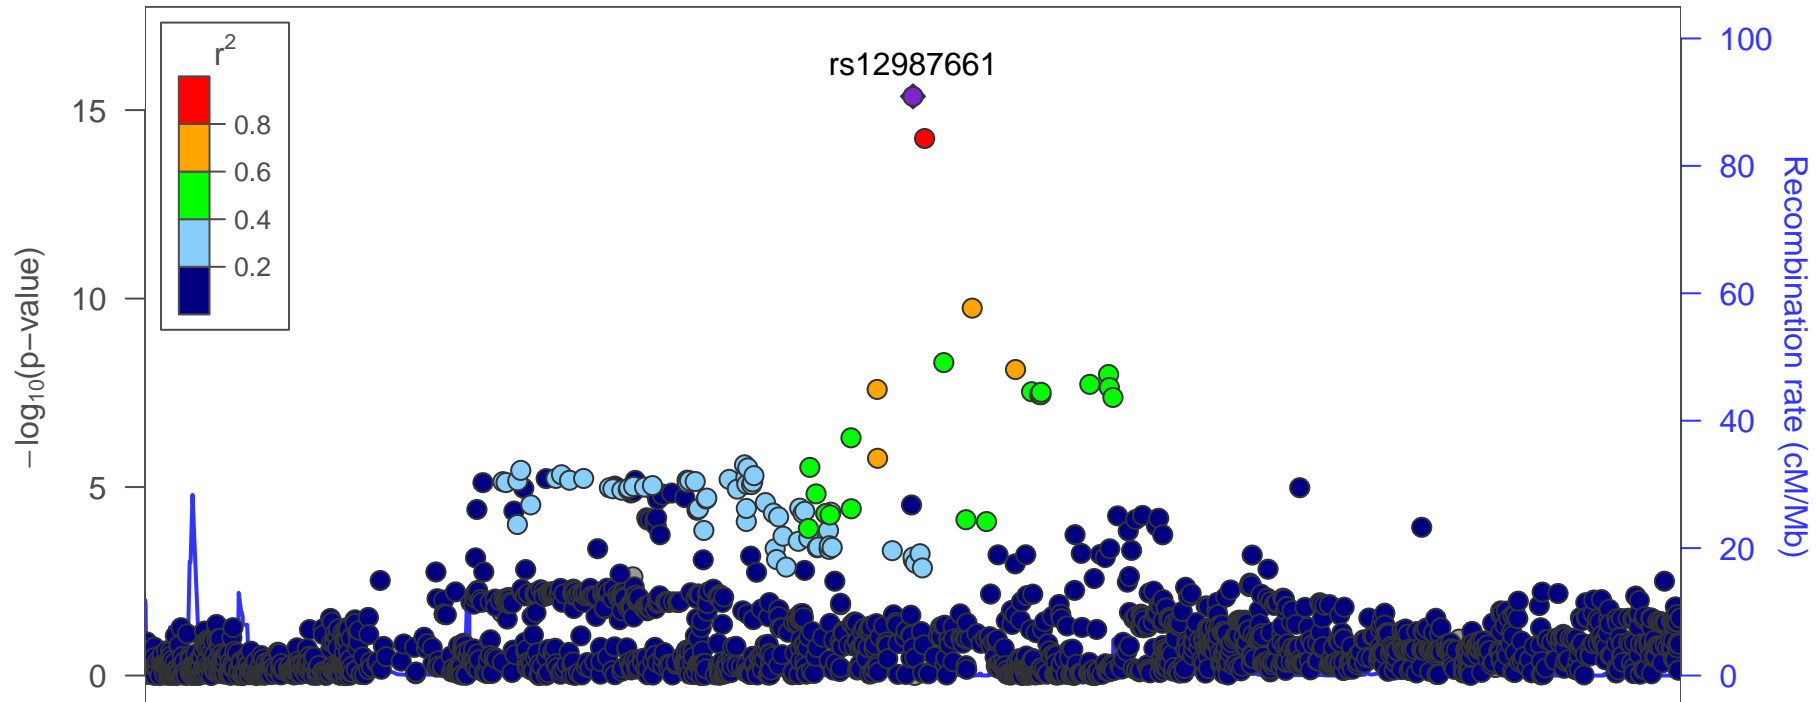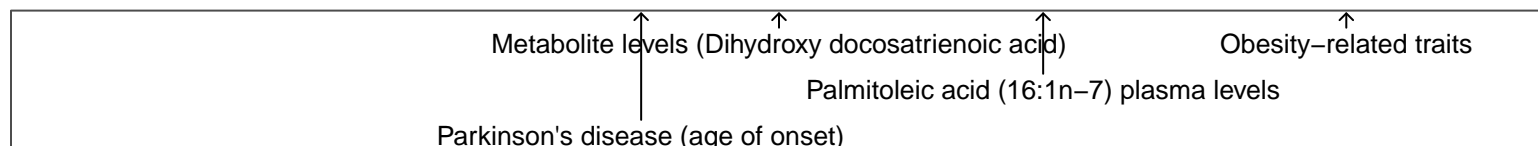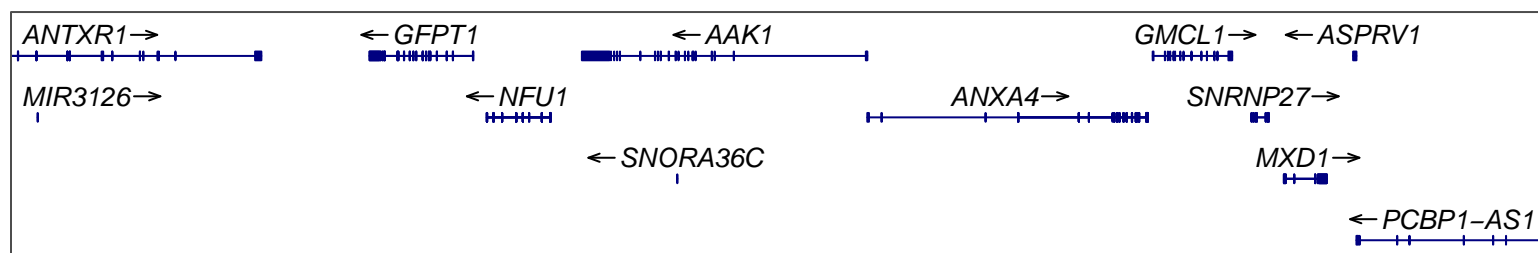

69.4                      69.6                      69.8                      70                      70.2

Position on chr2 (Mb)

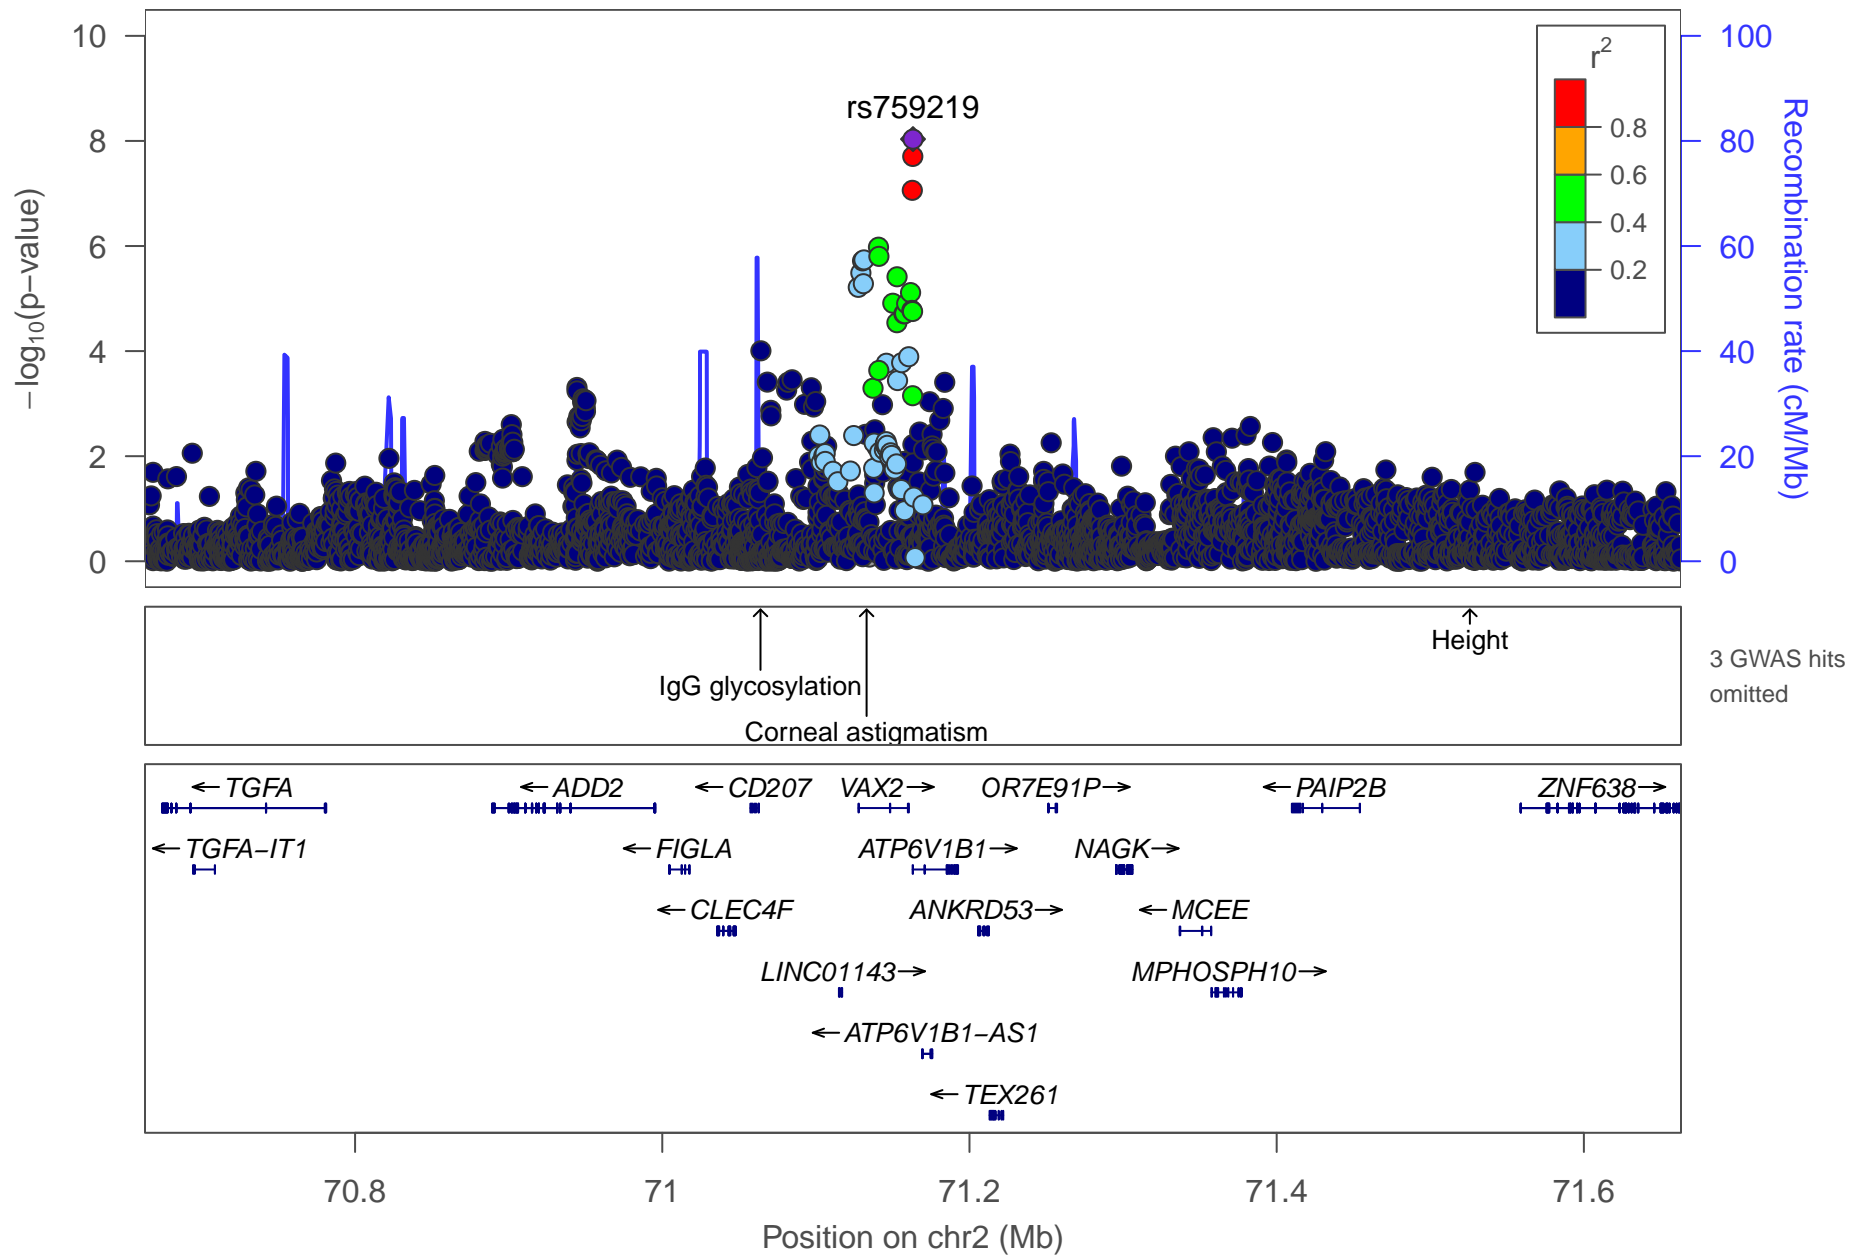

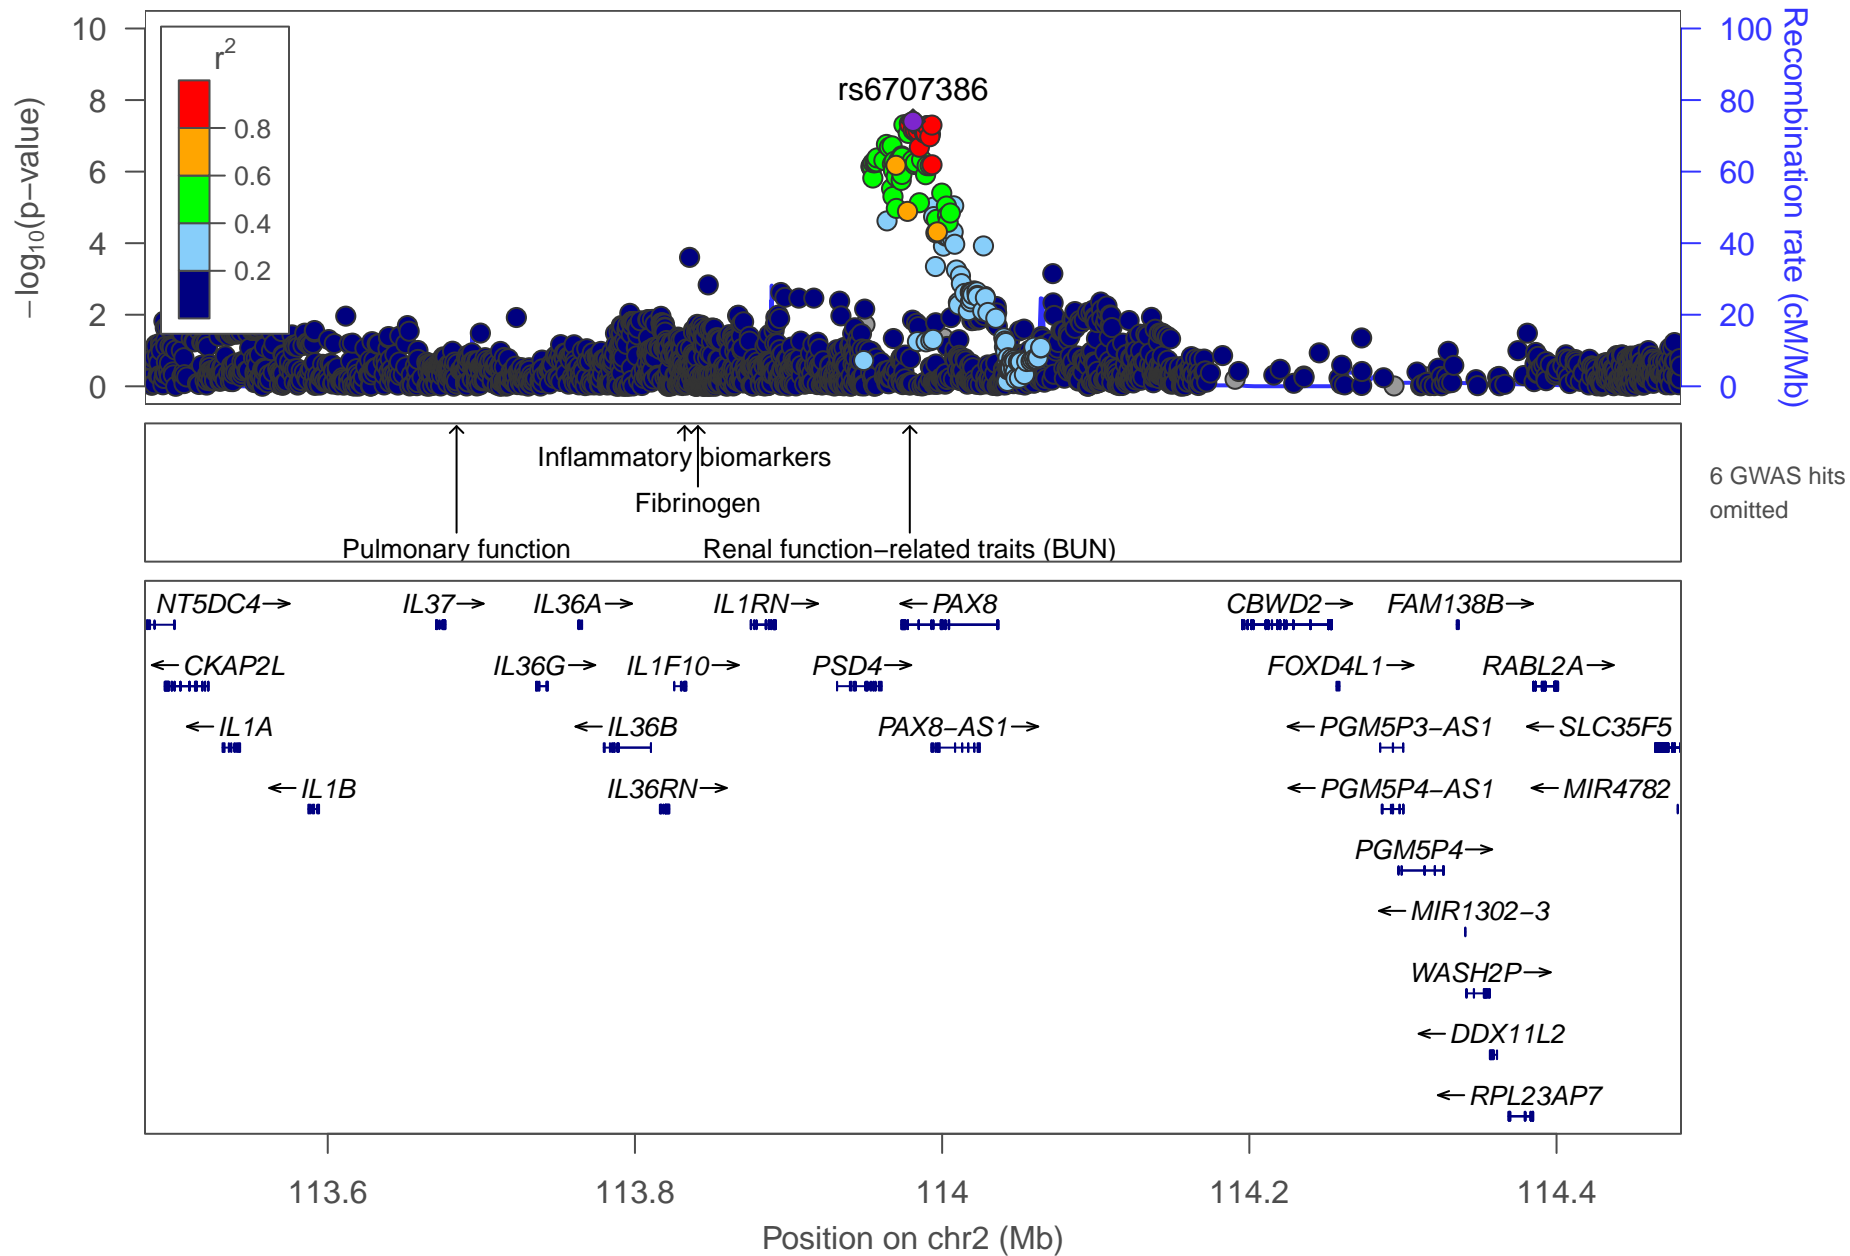

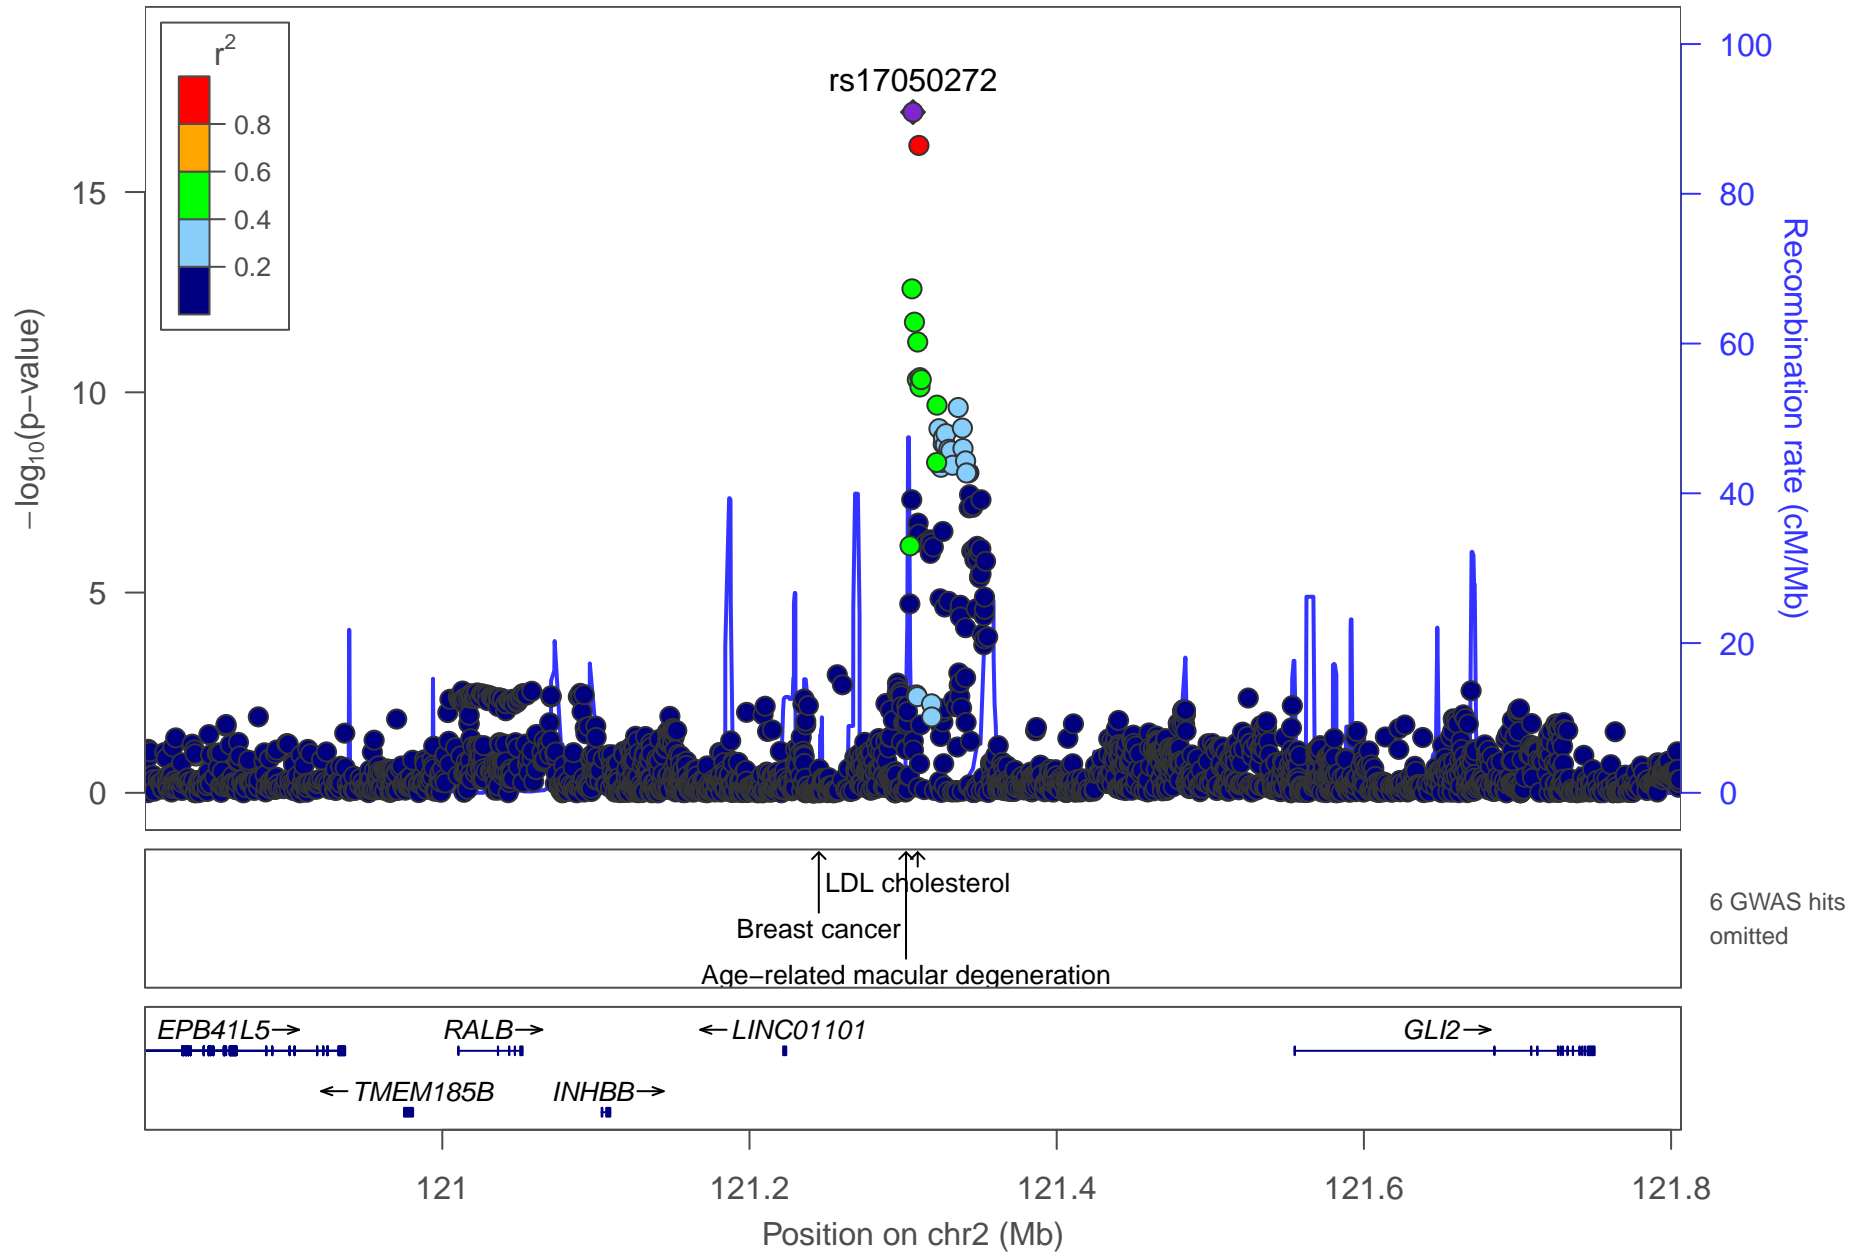

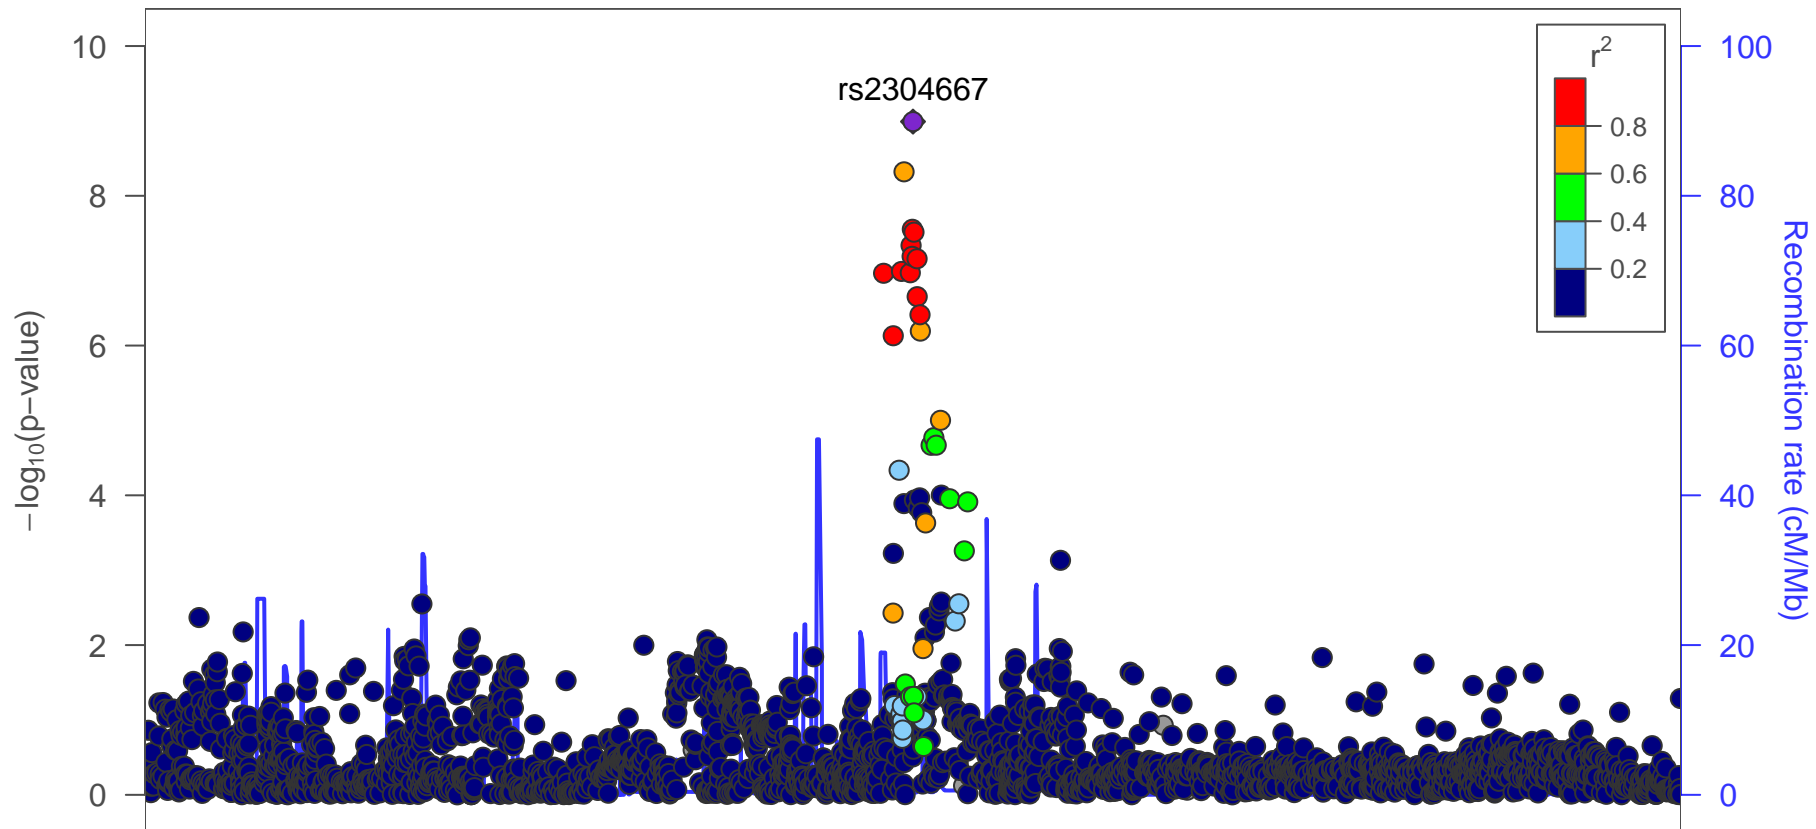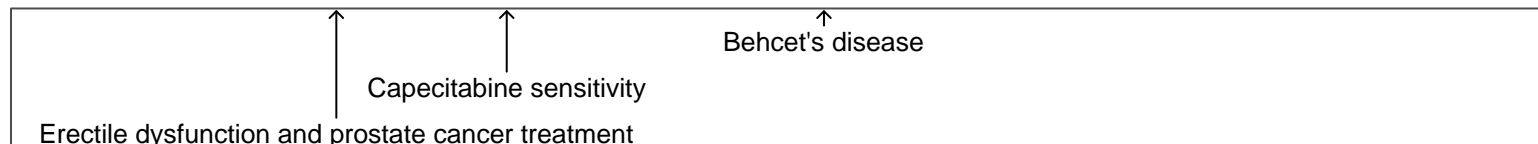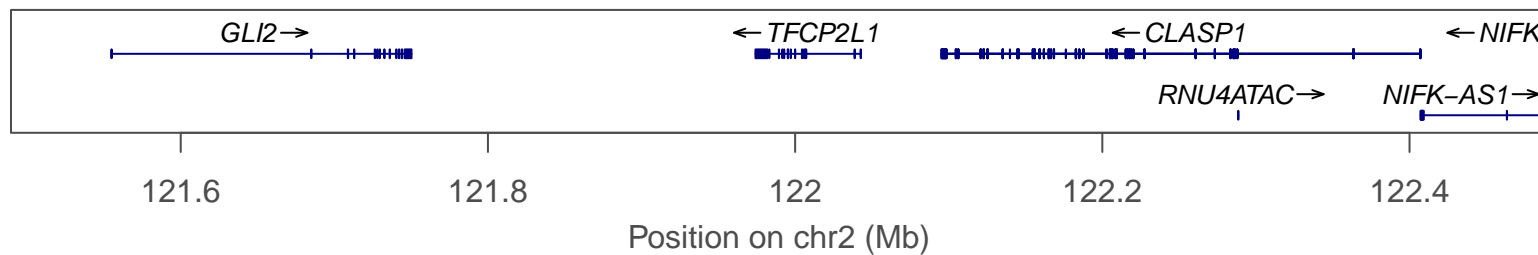

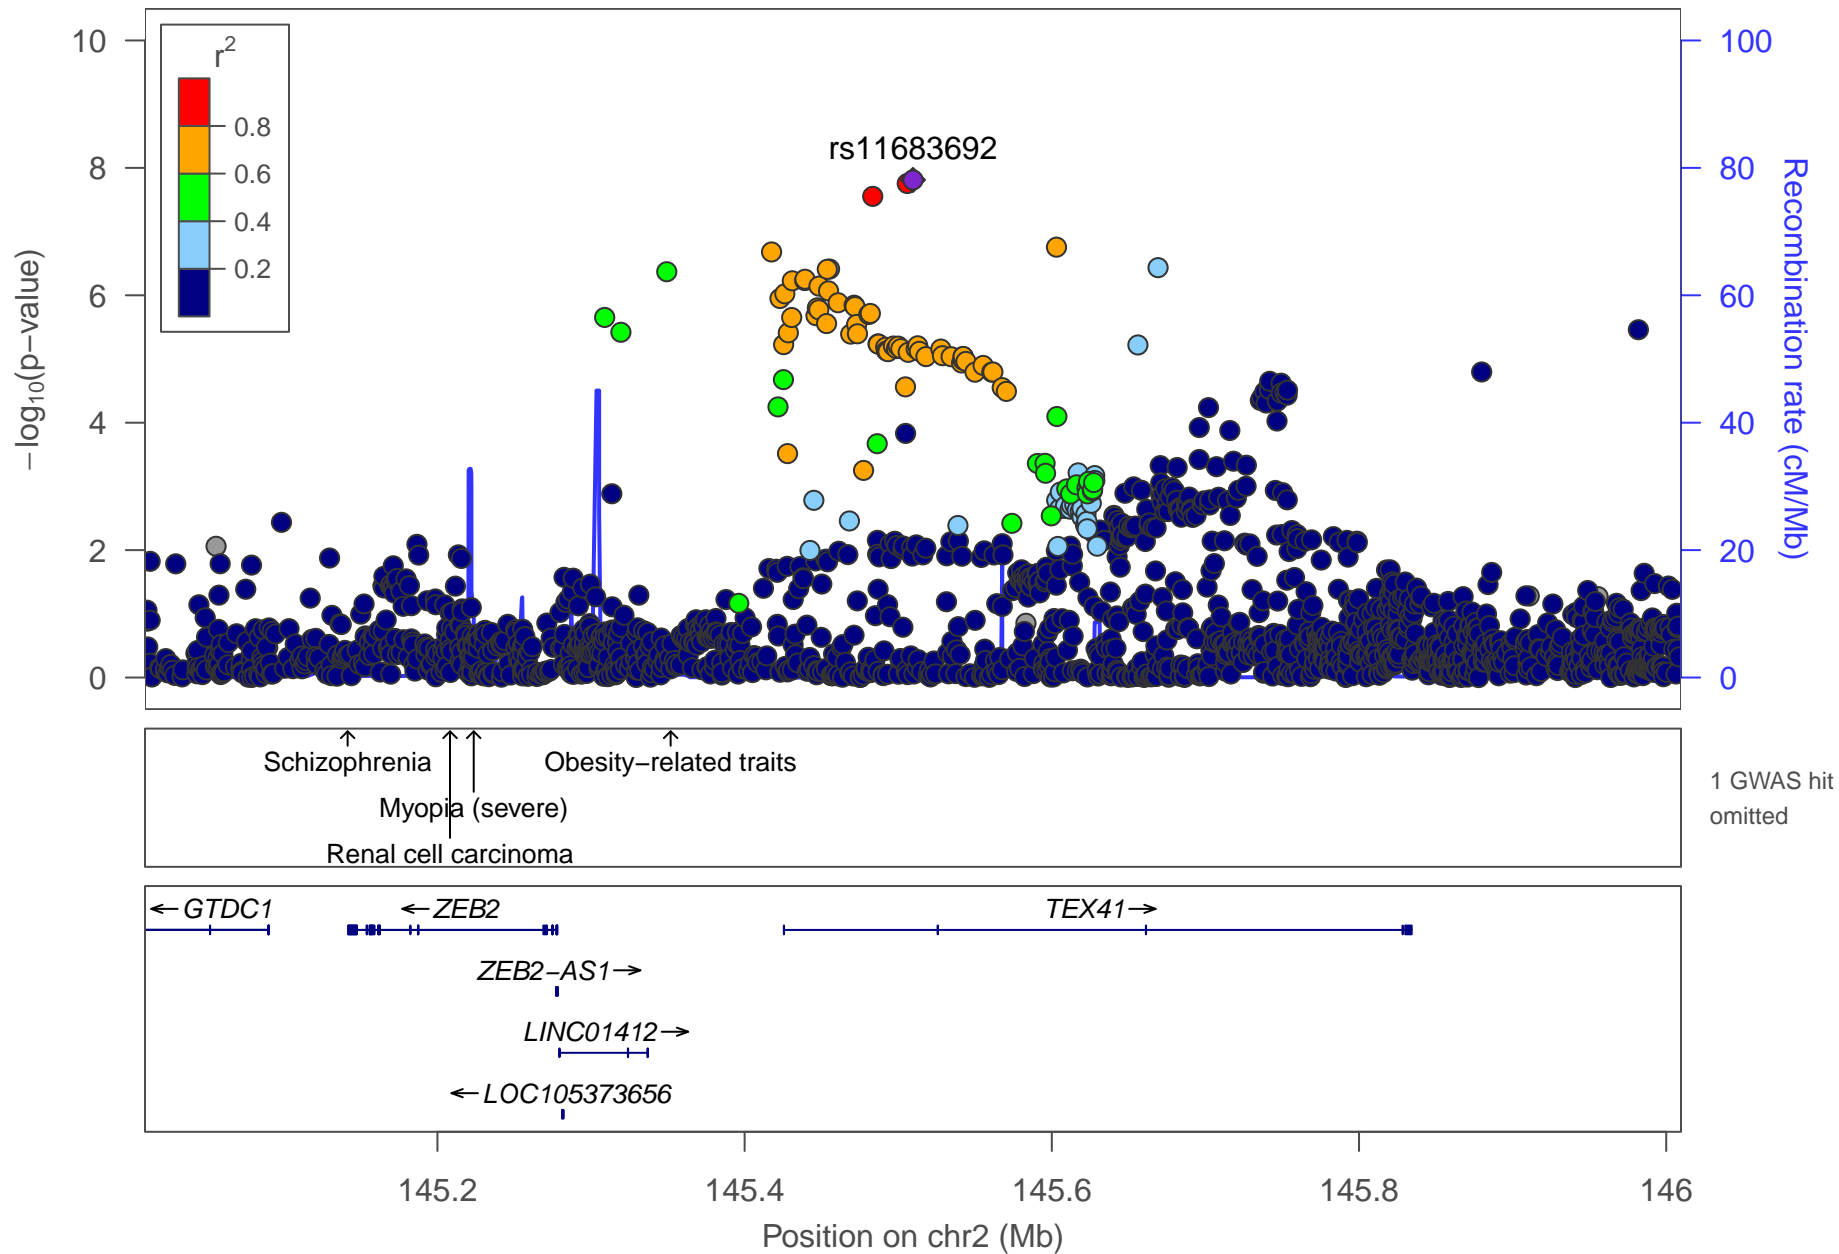



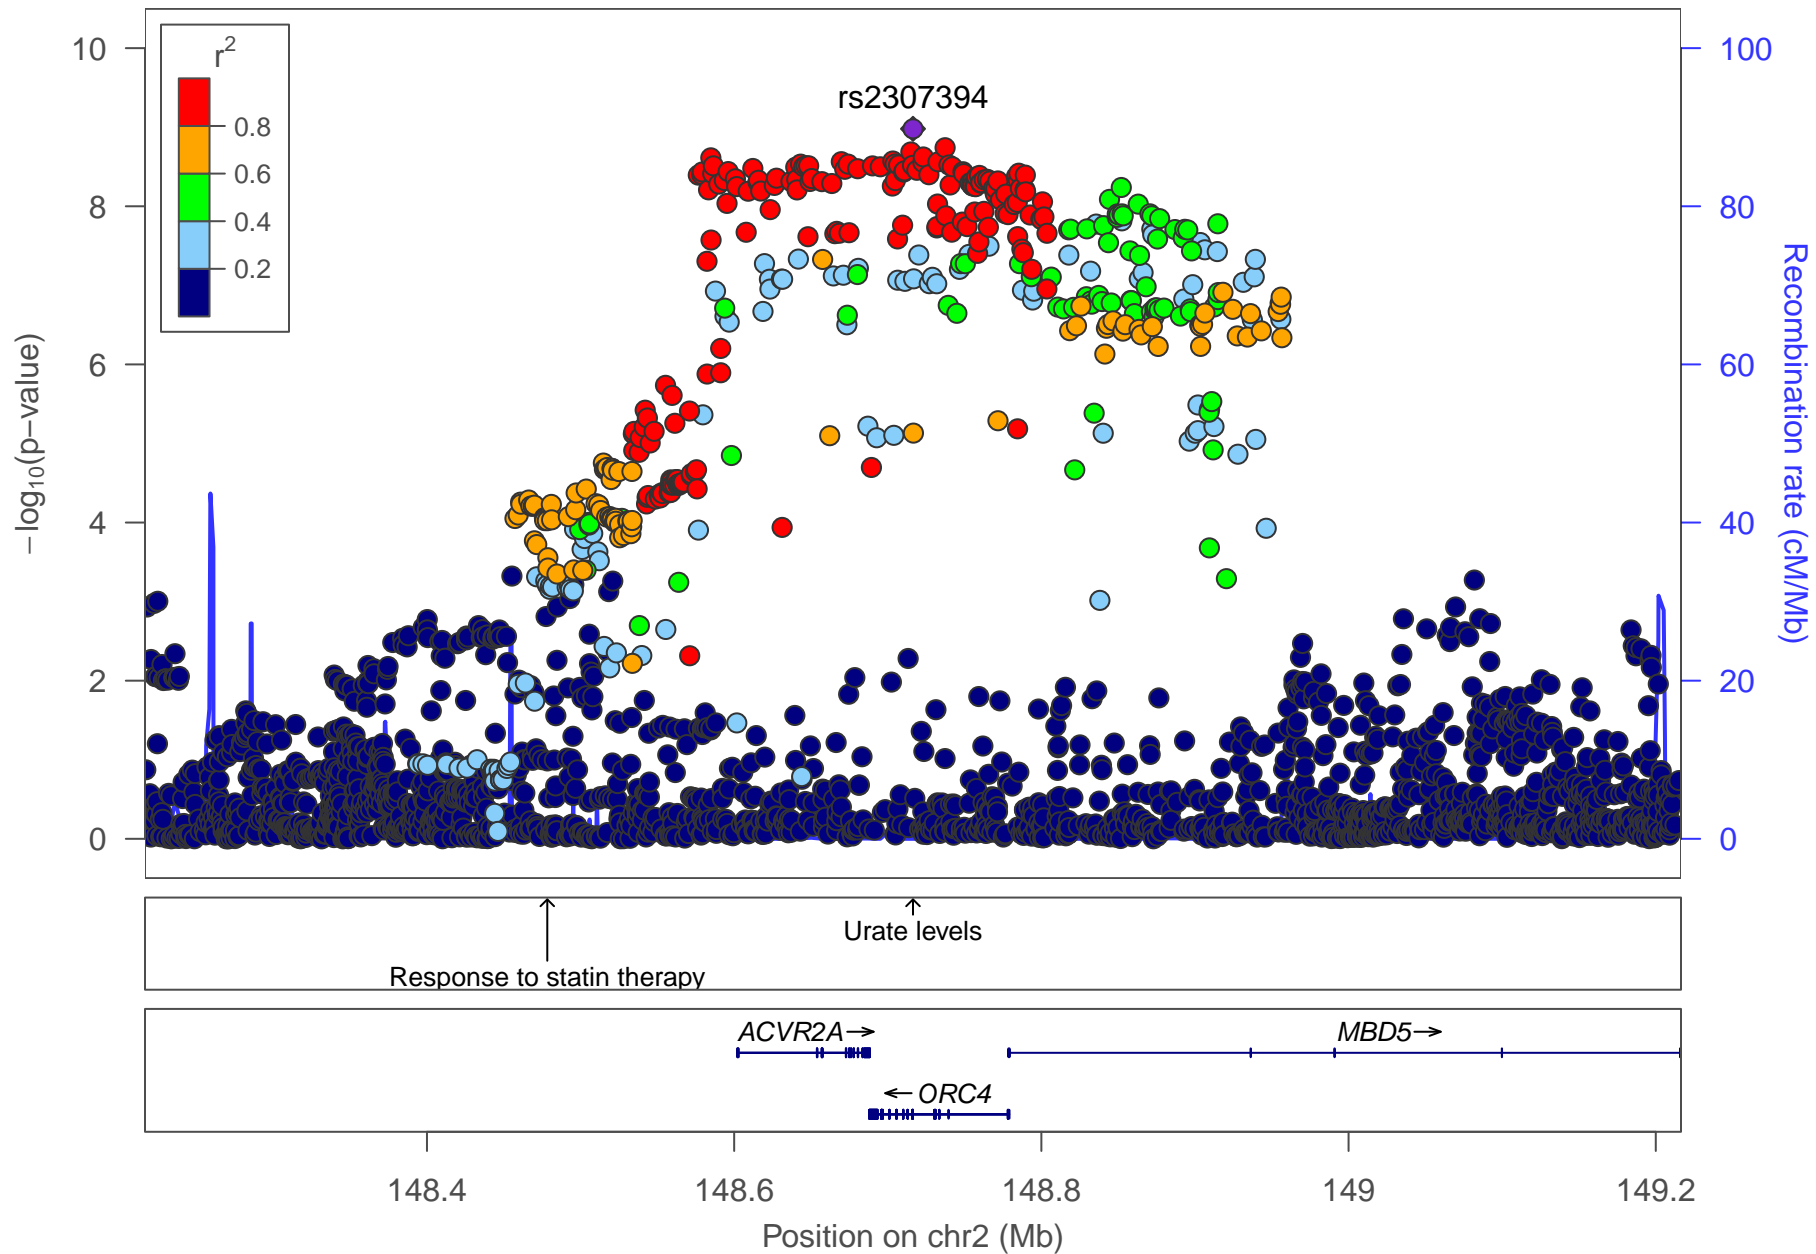

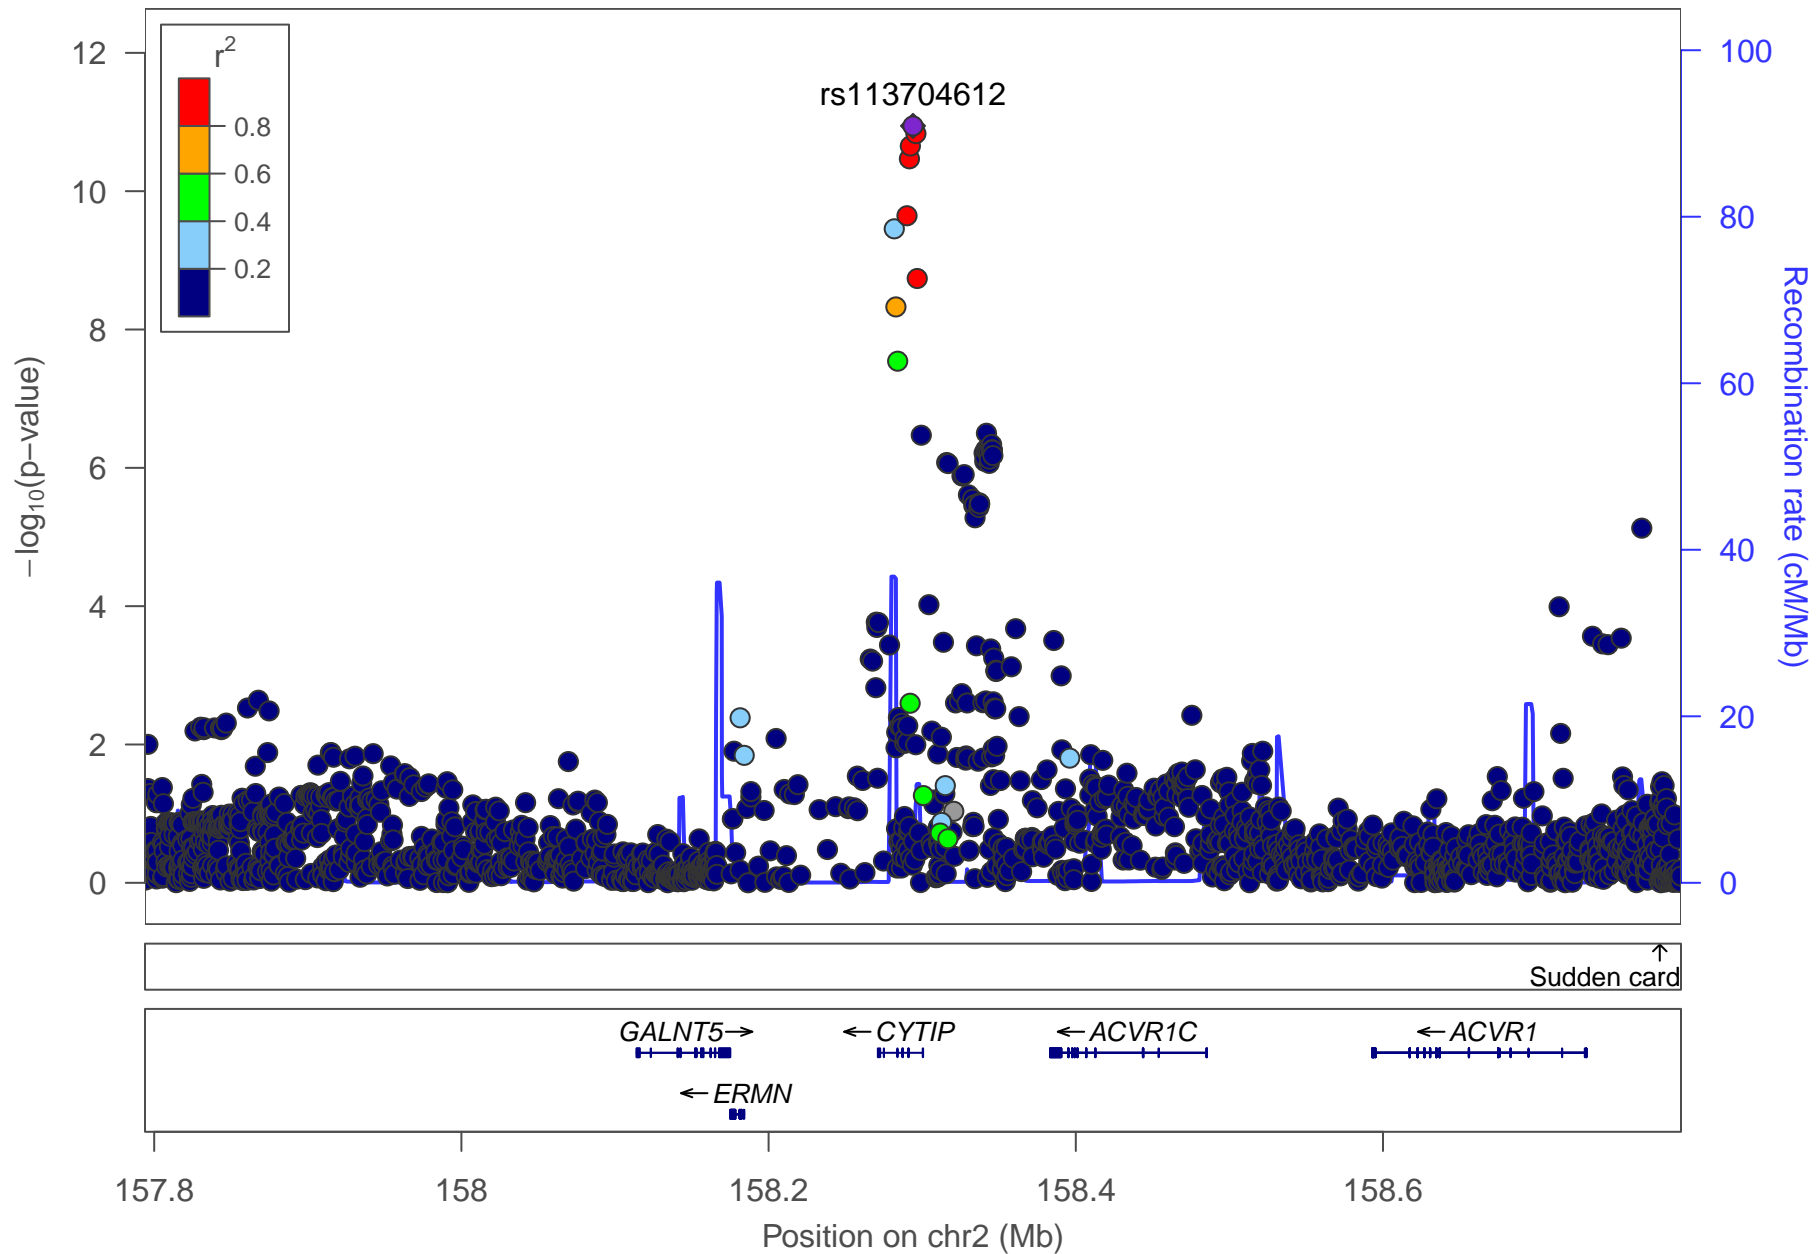

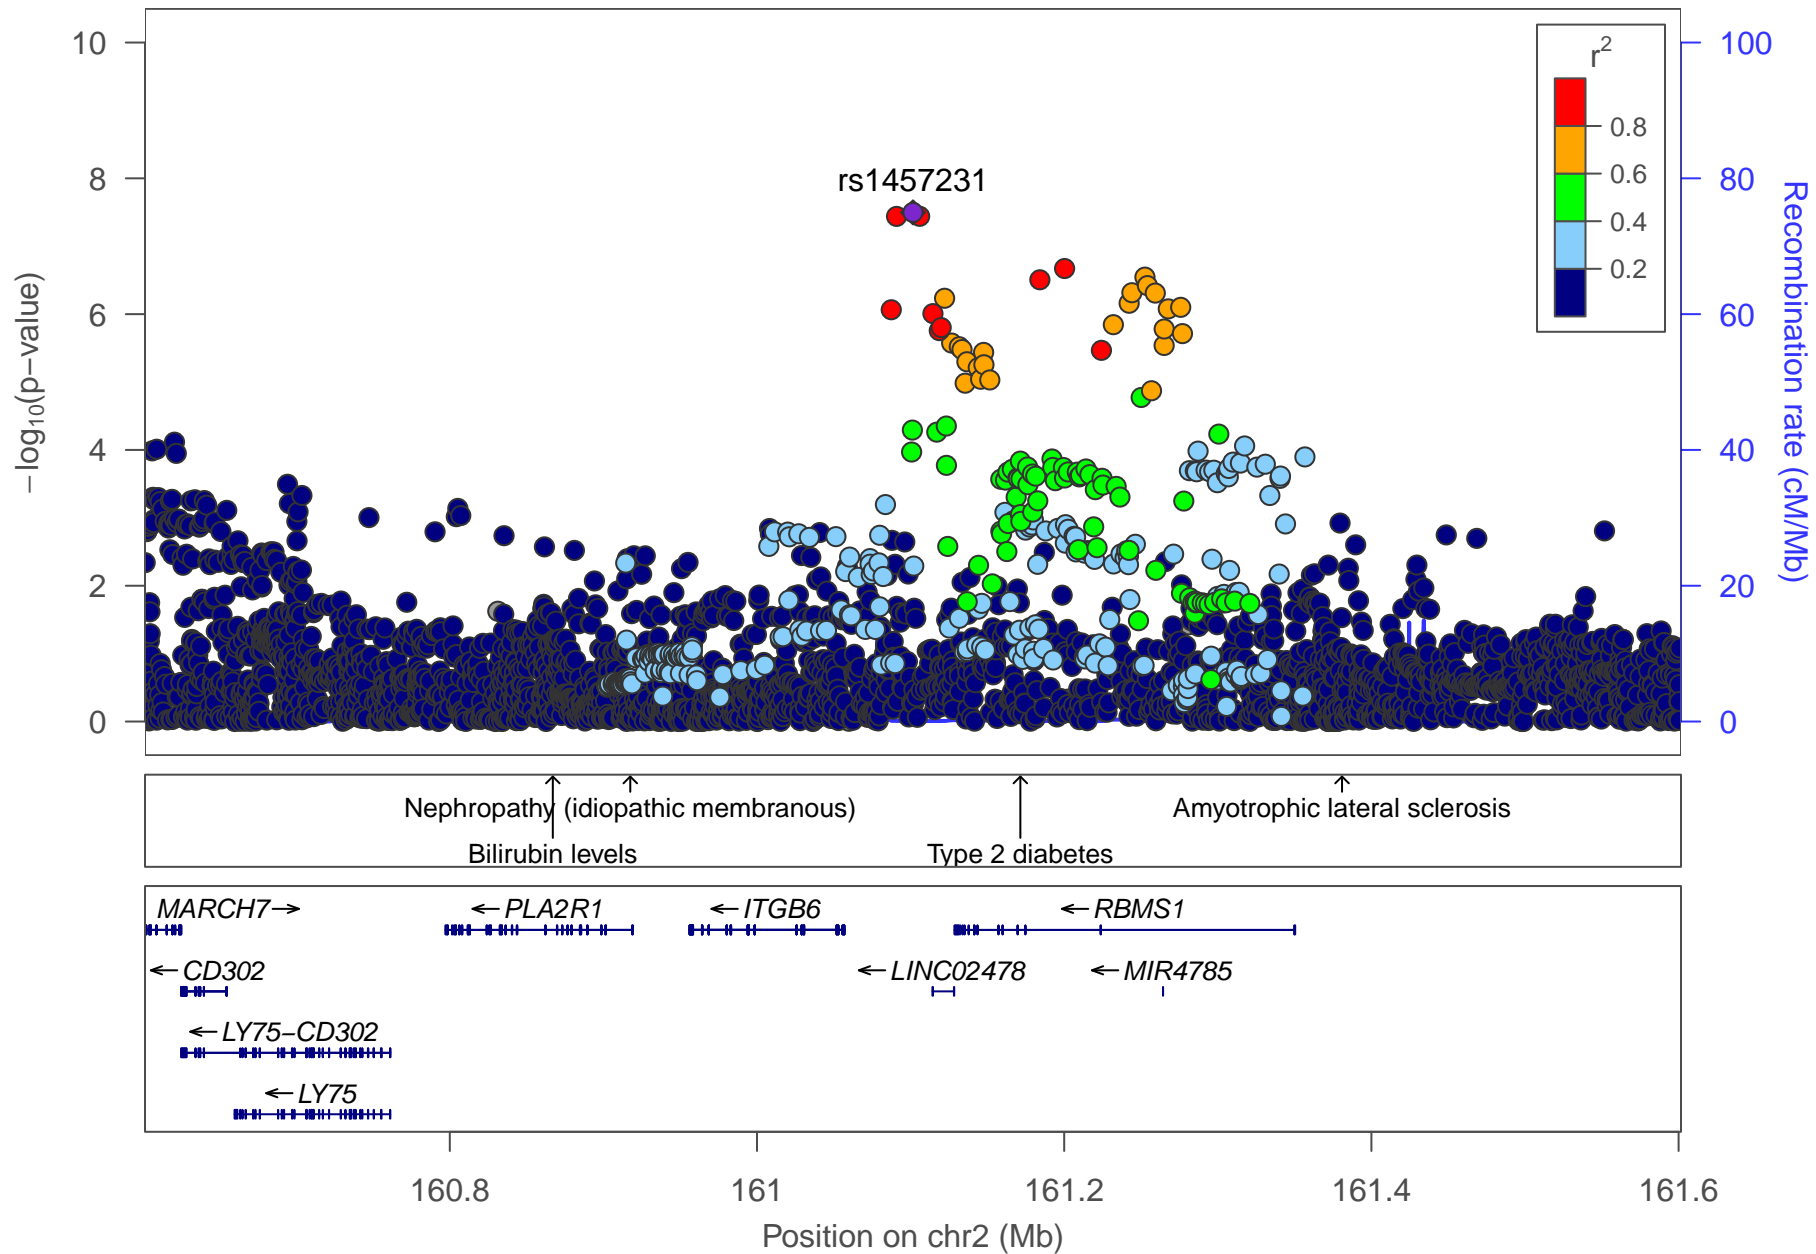

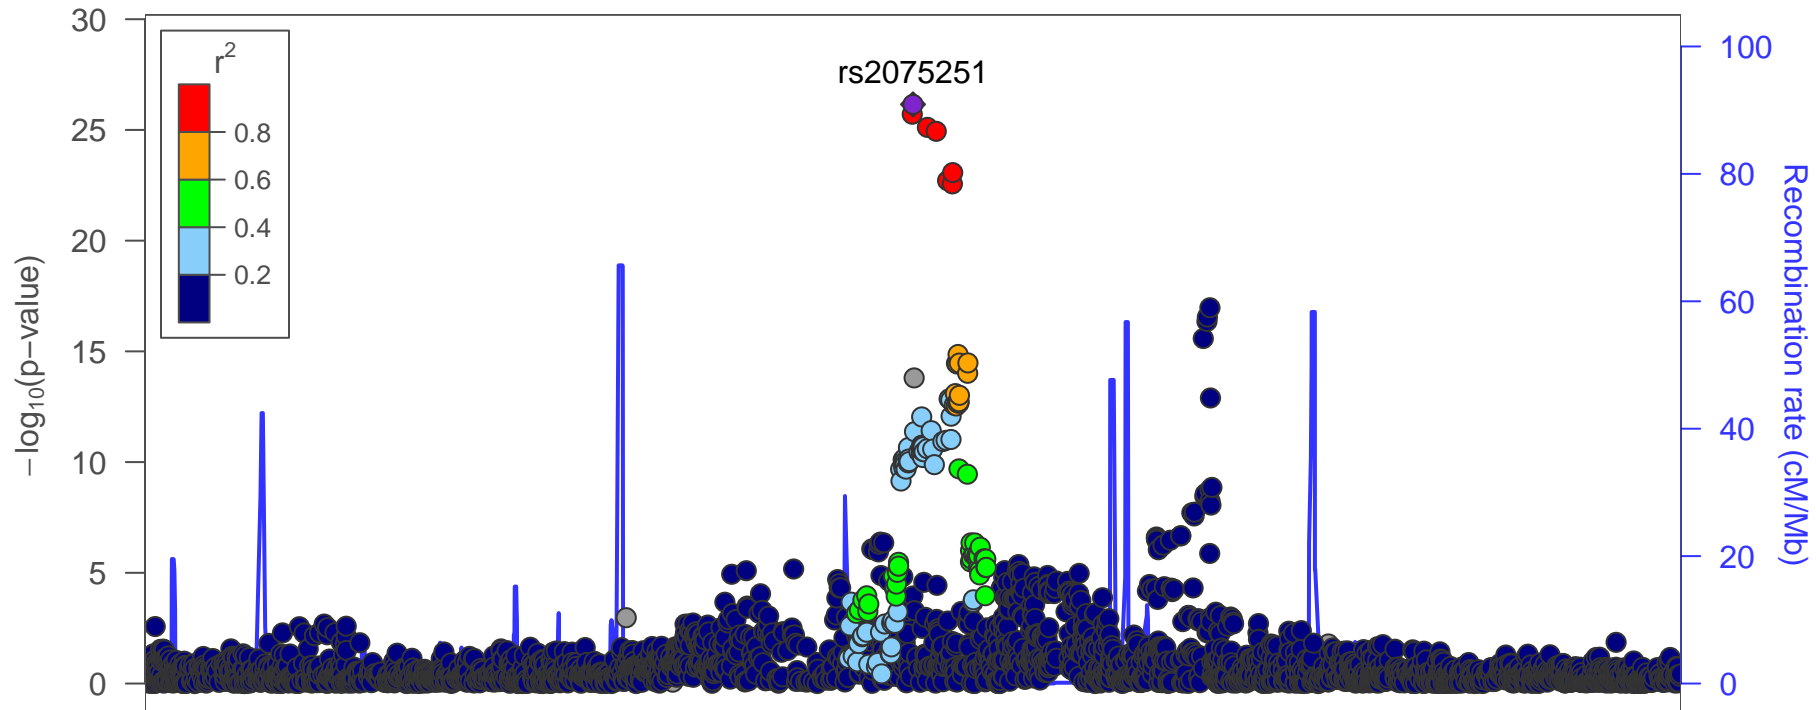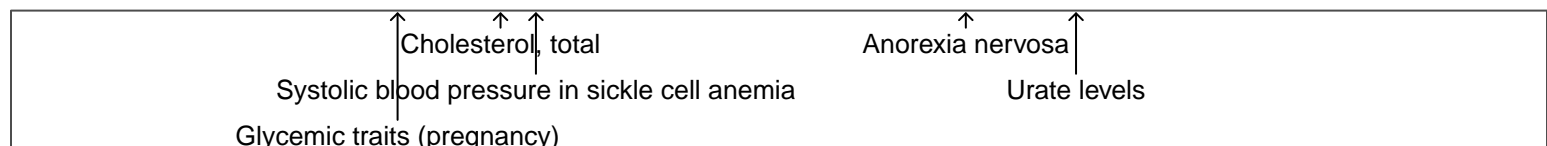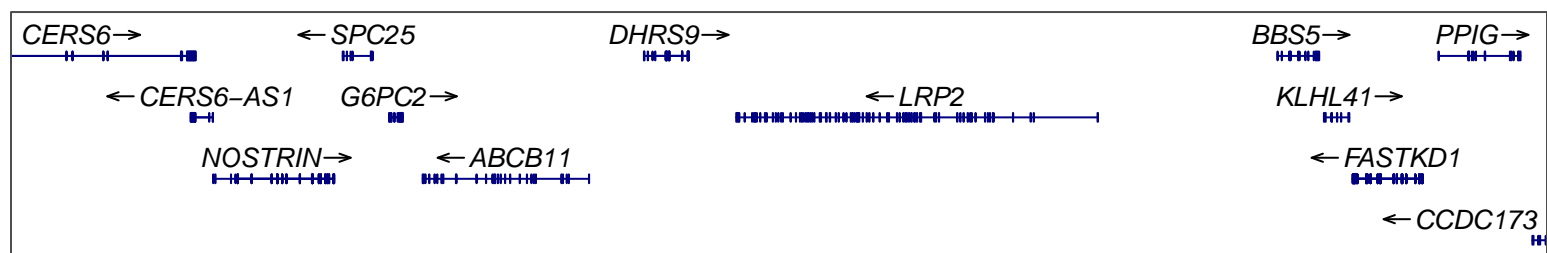

169.6                      169.8                      170                      170.2                      170.4

Position on chr2 (Mb)

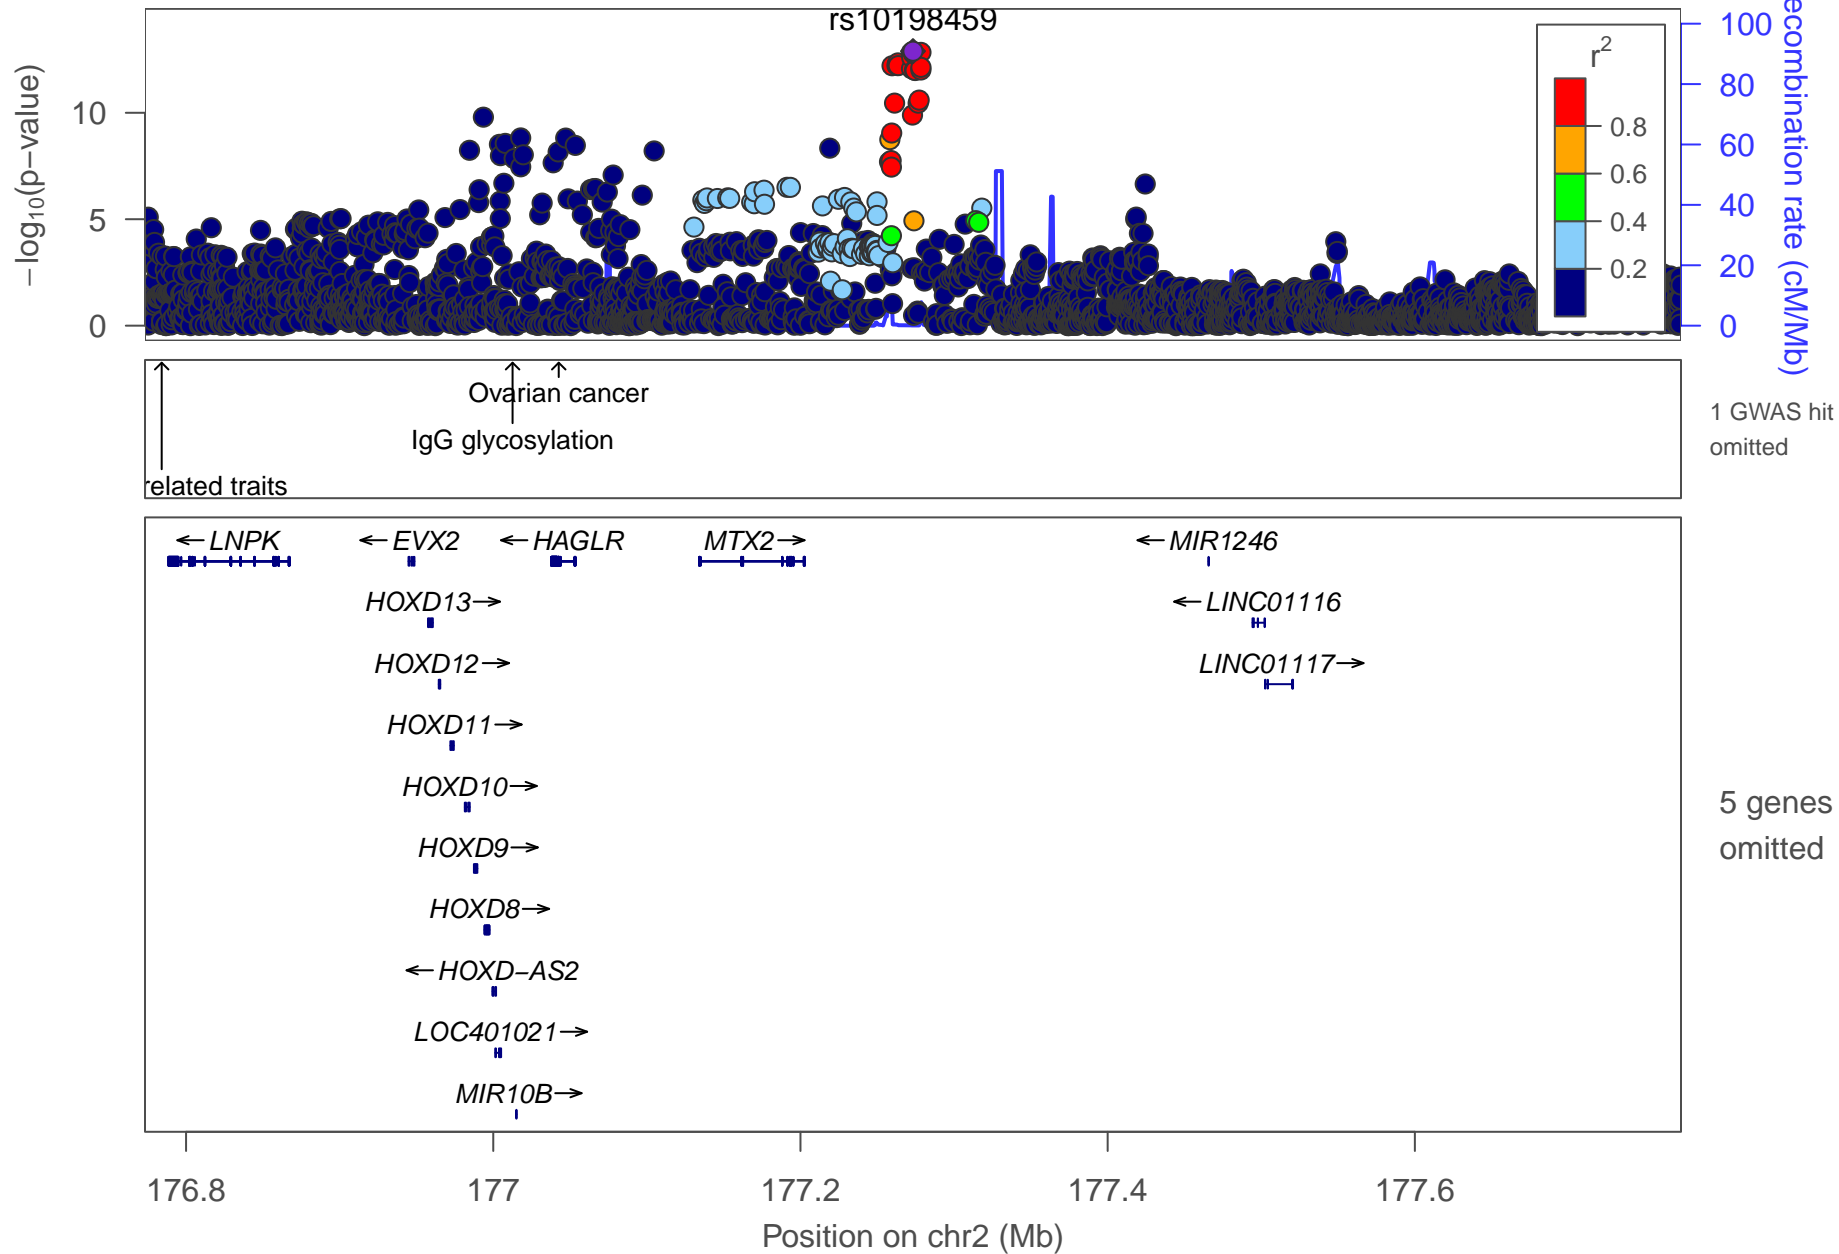

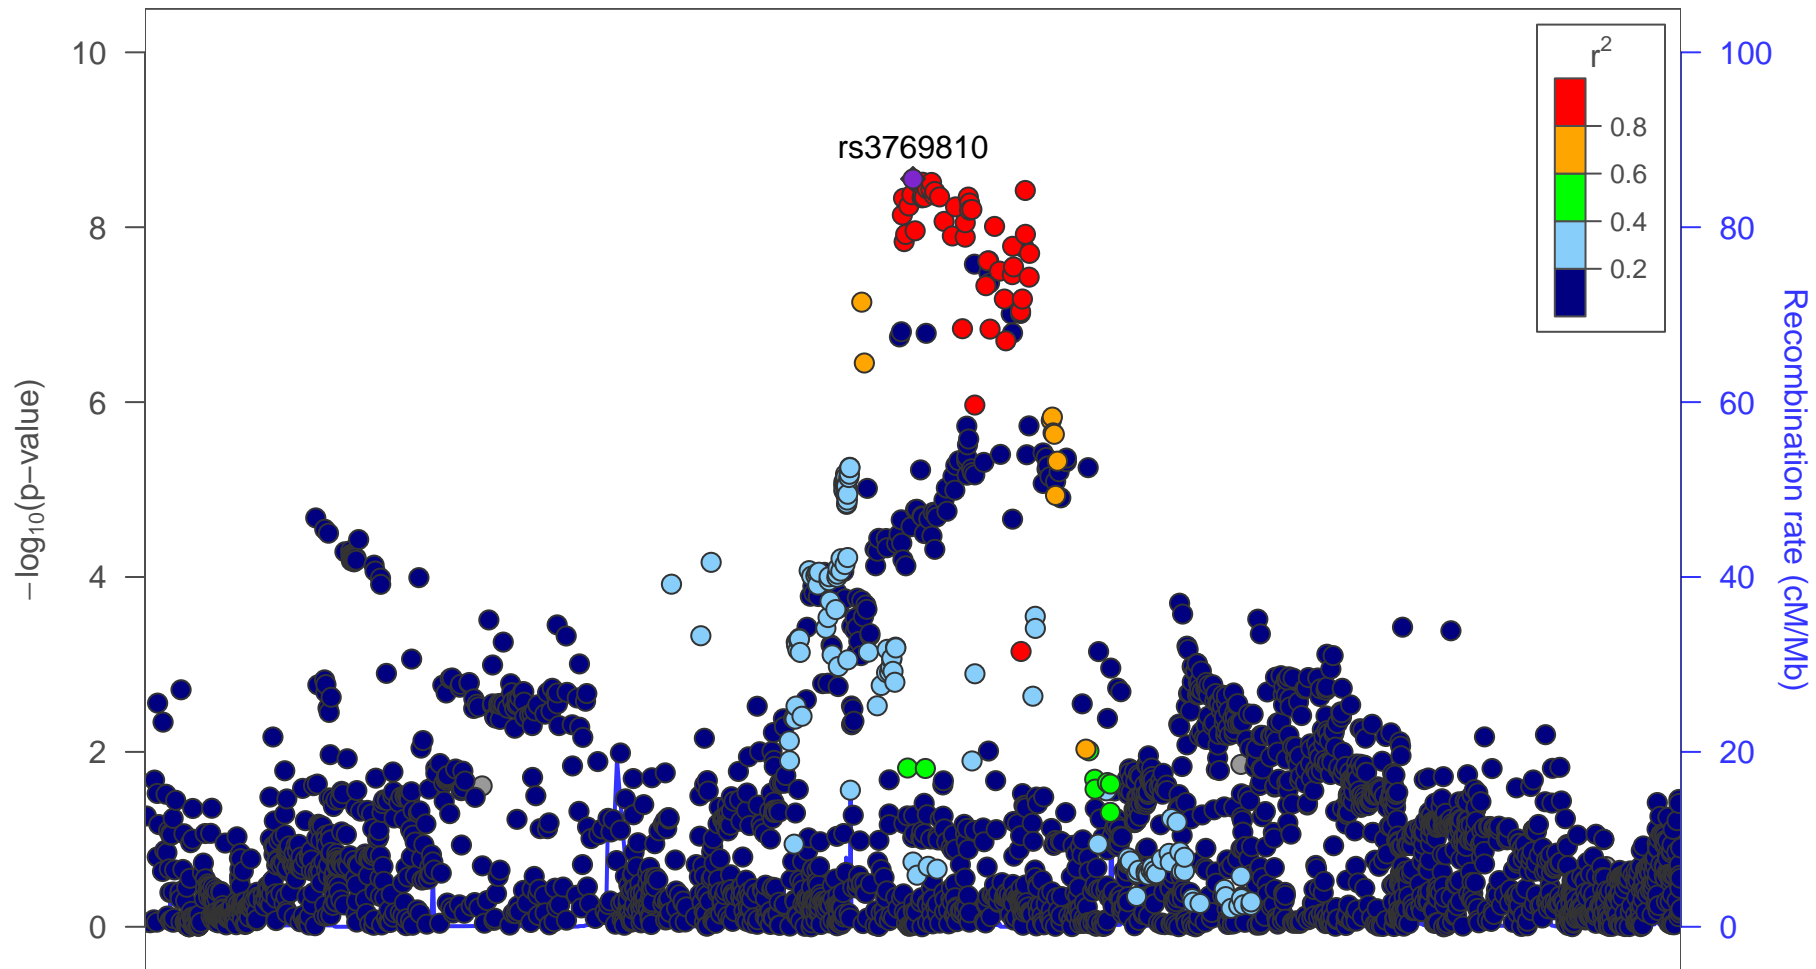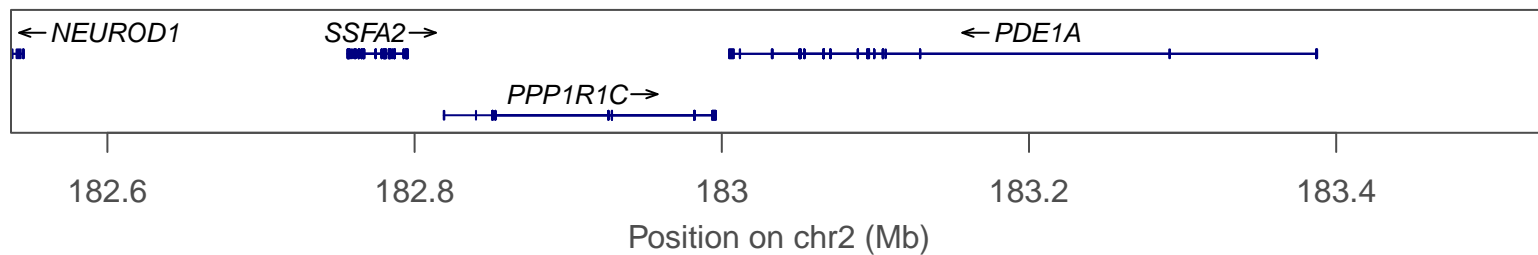

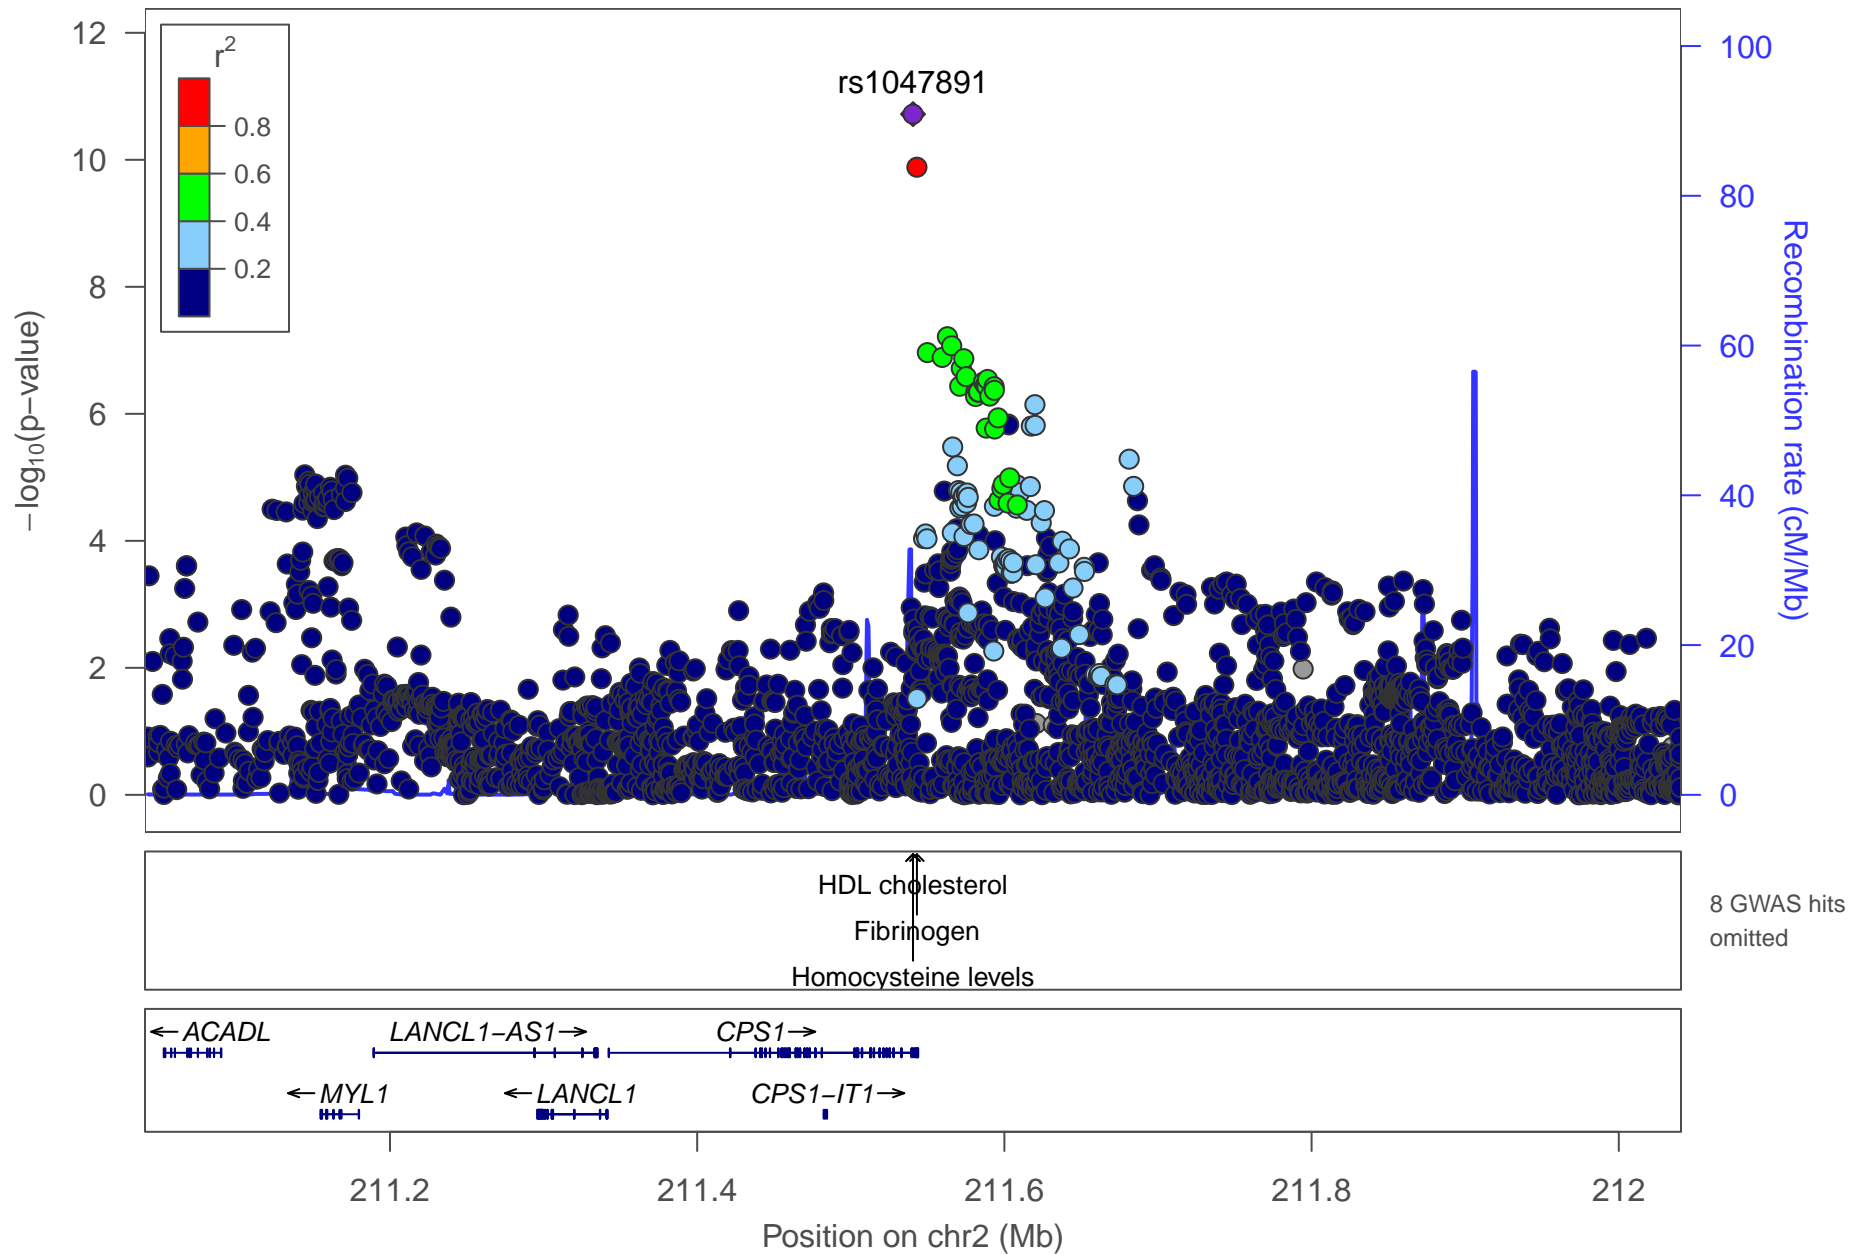

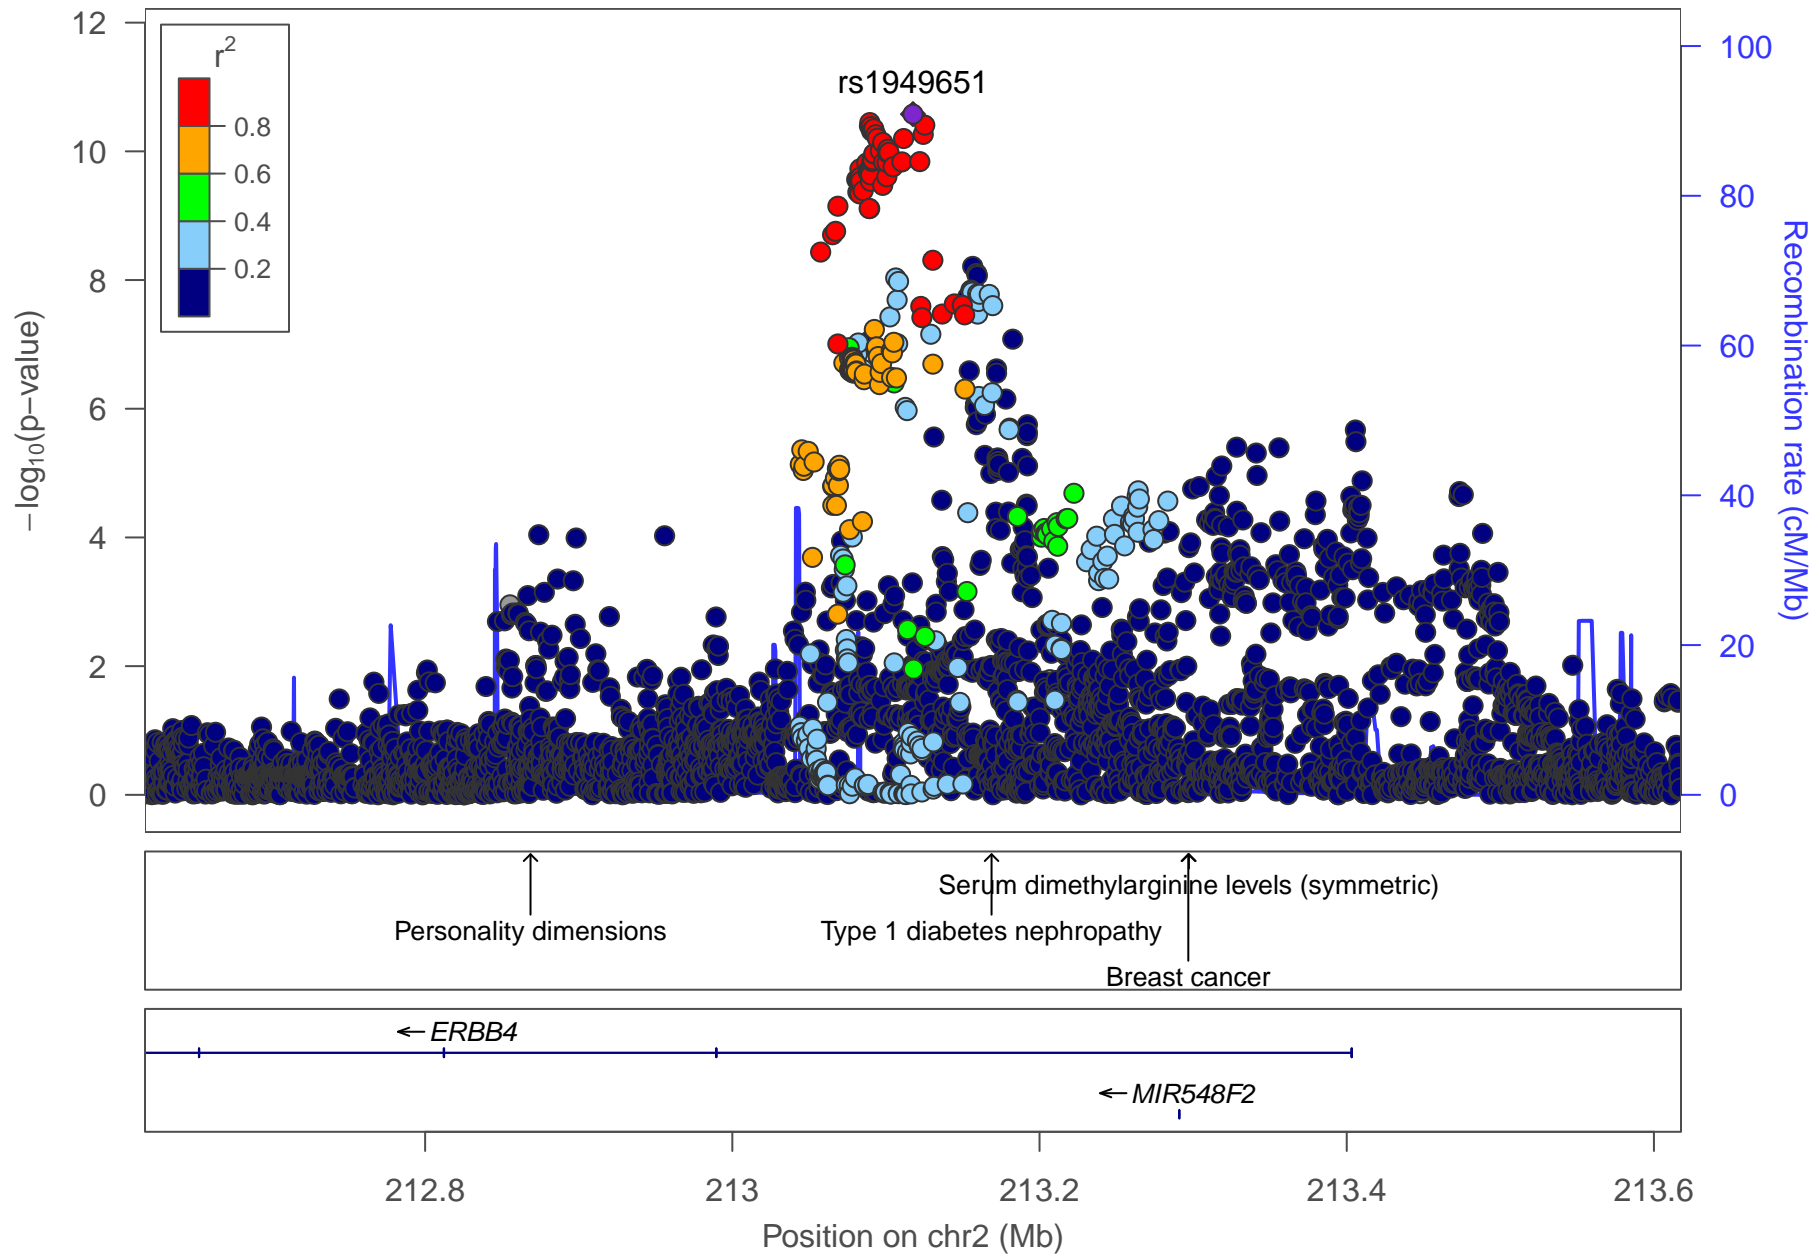



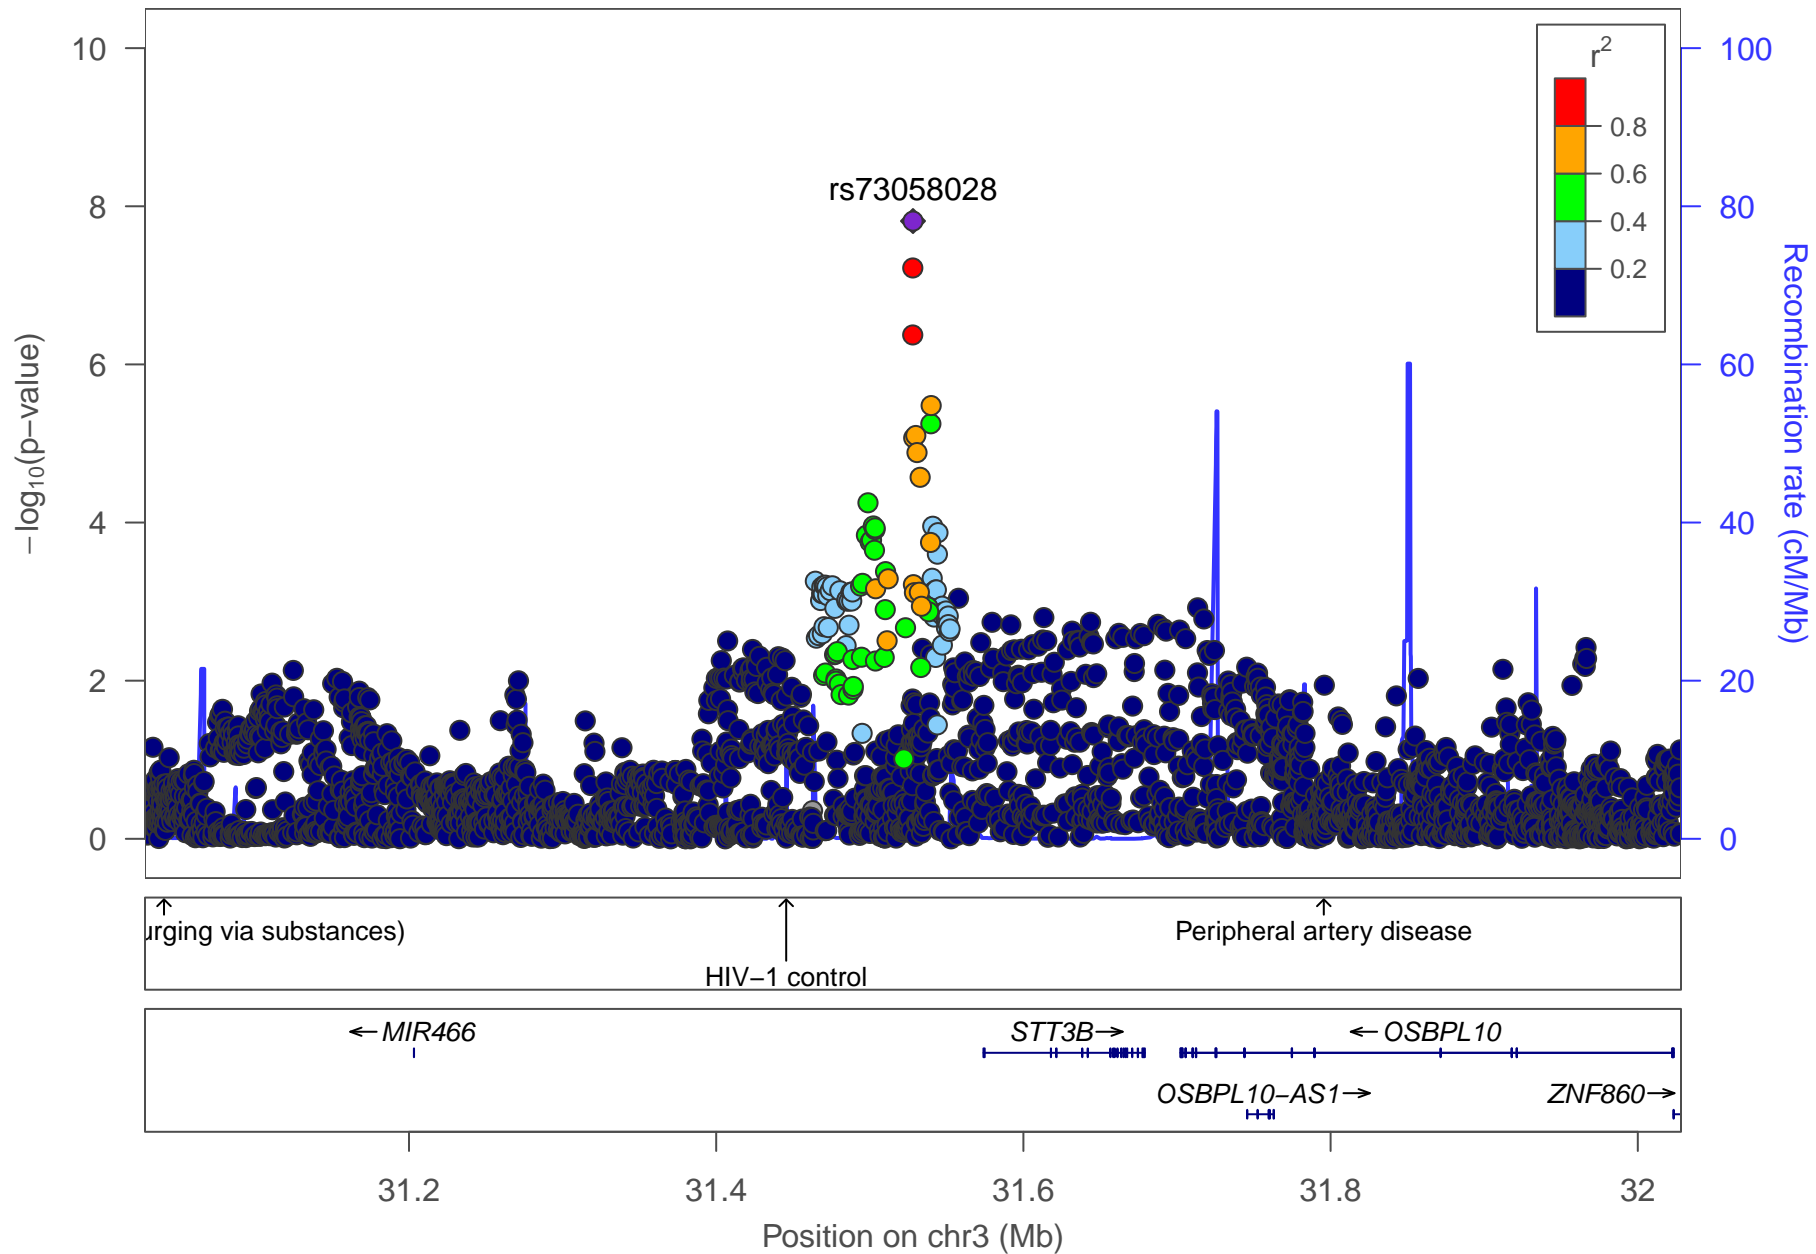

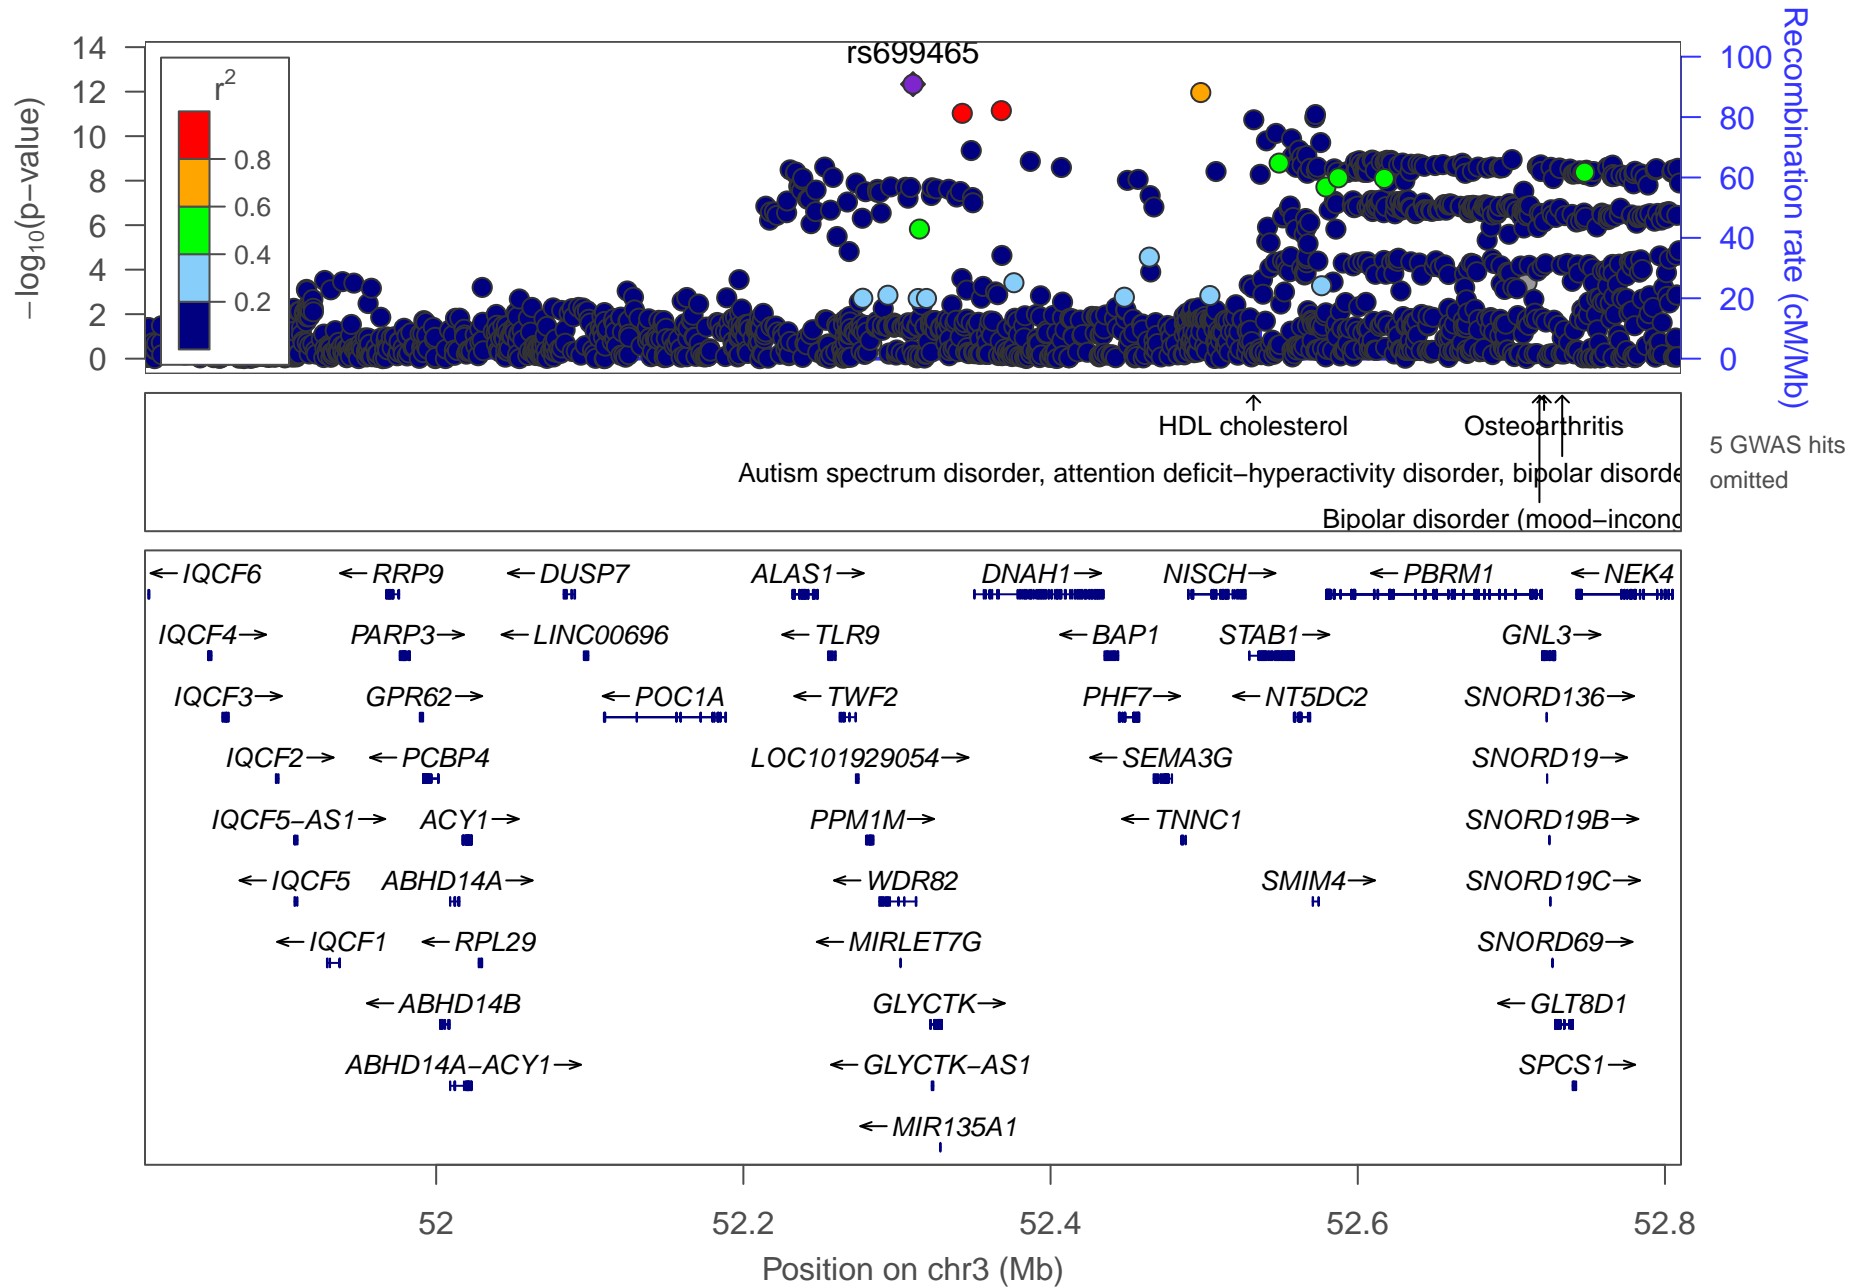

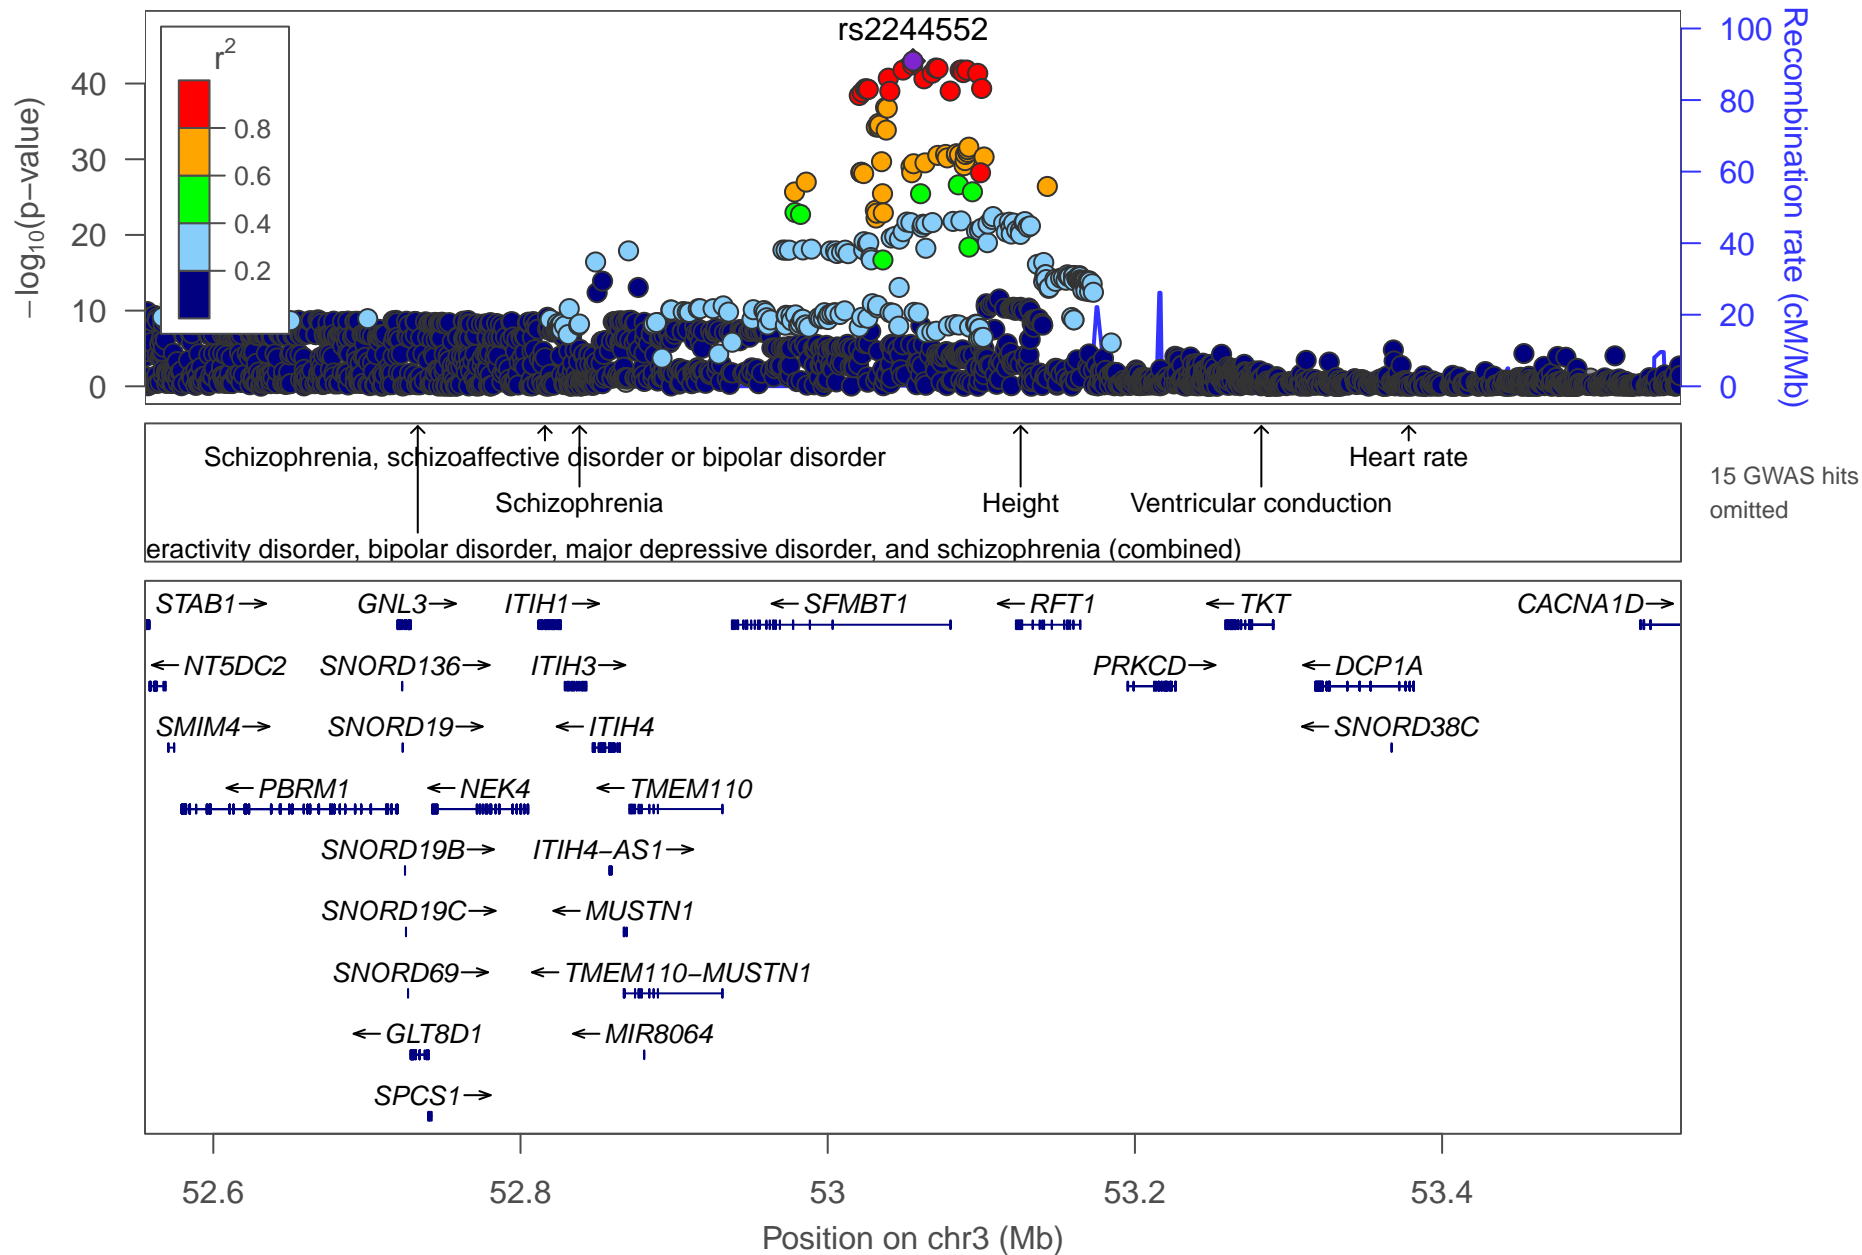

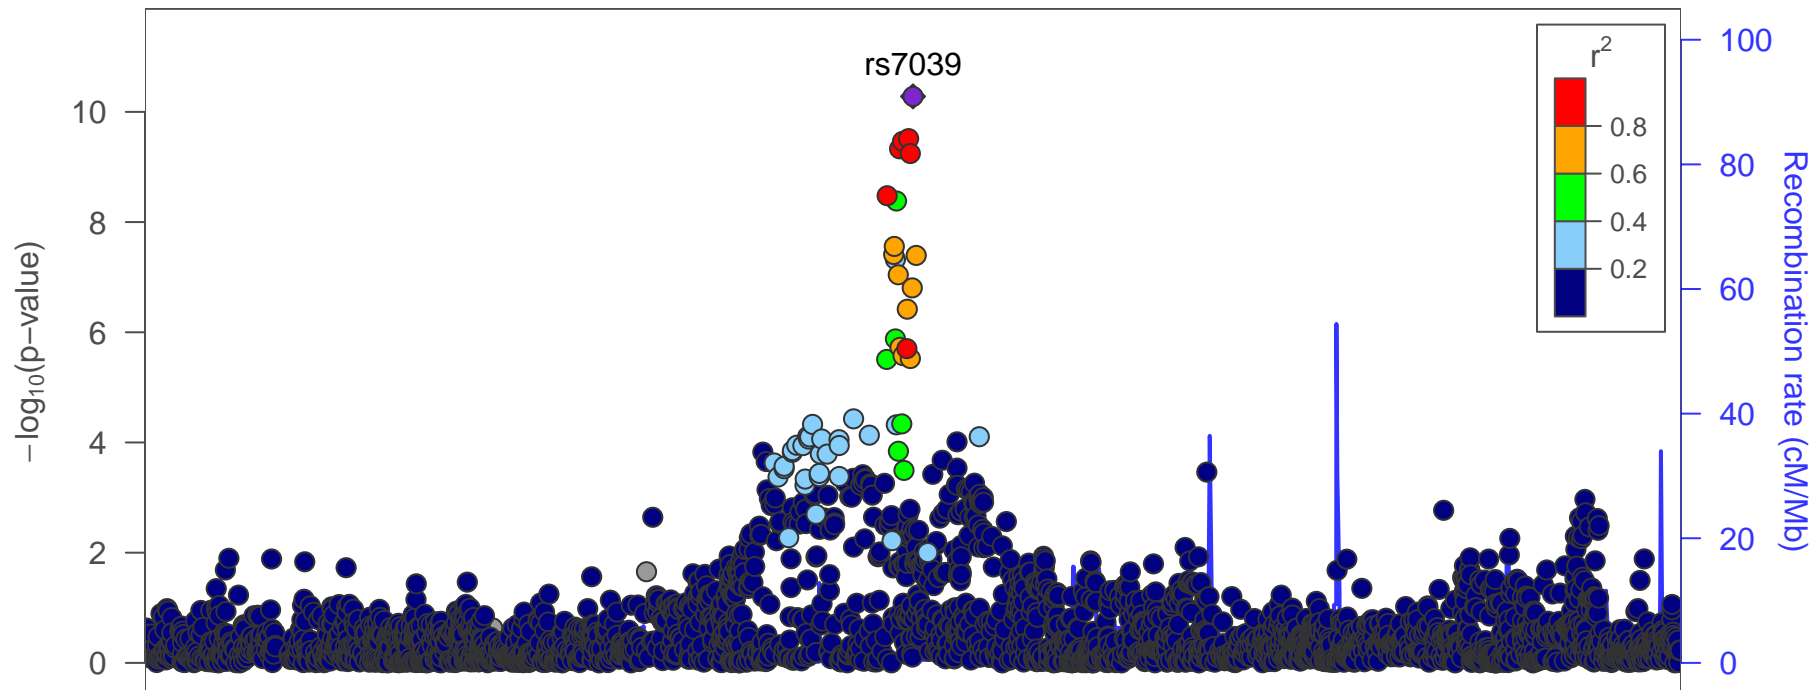

Alzheimer's disease (late onset)      Hip geometry

Celiac disease

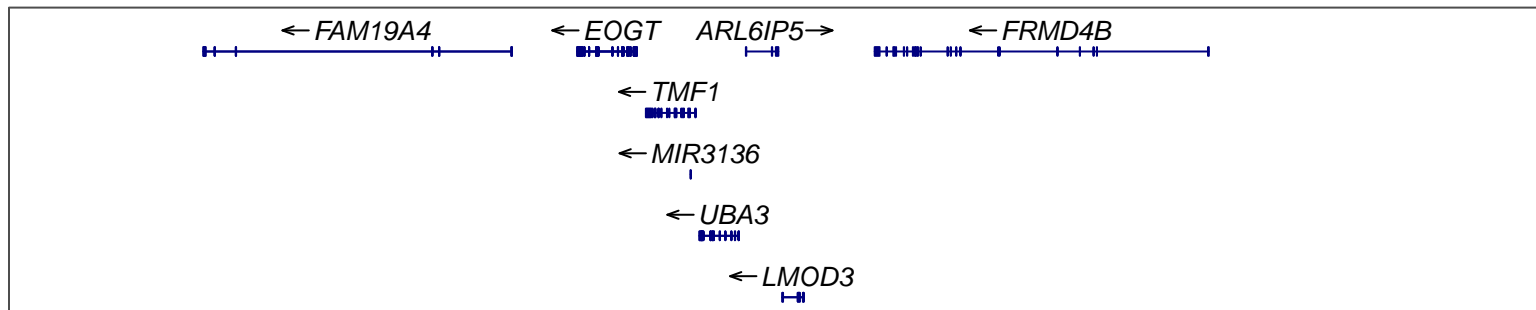

68.8      69      69.2      69.4      69.6

Position on chr3 (Mb)

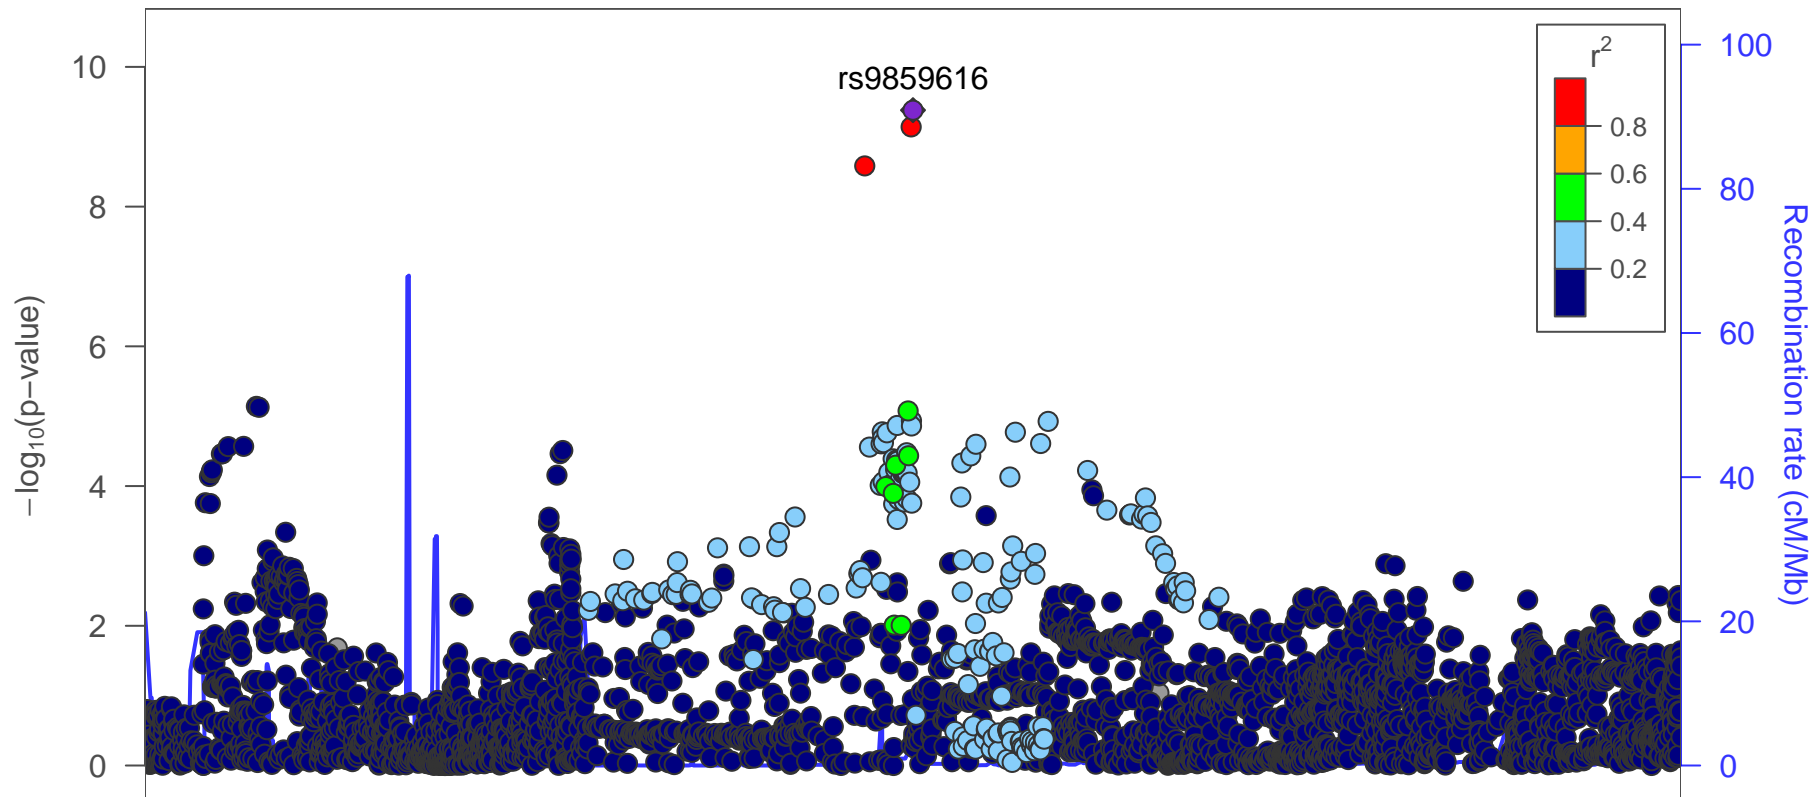

Metabolite levels (HVA/5- ↑)

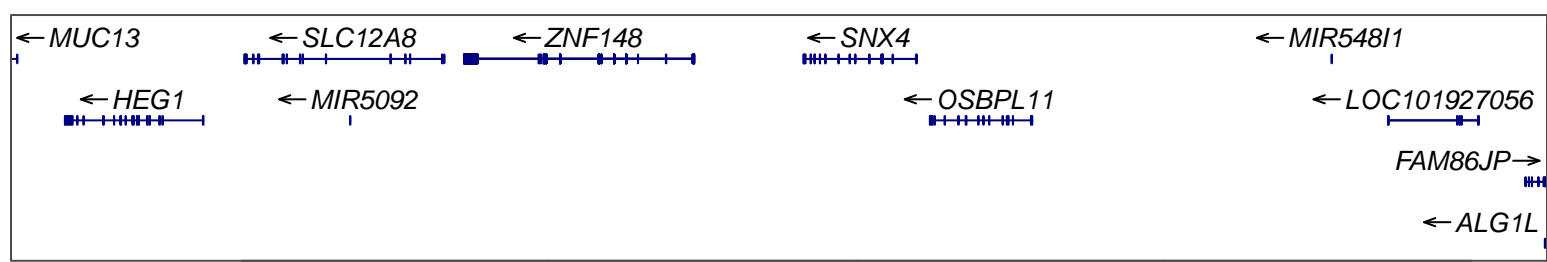

124.8                      125                      125.2                      125.4                      125.6

Position on chr3 (Mb)

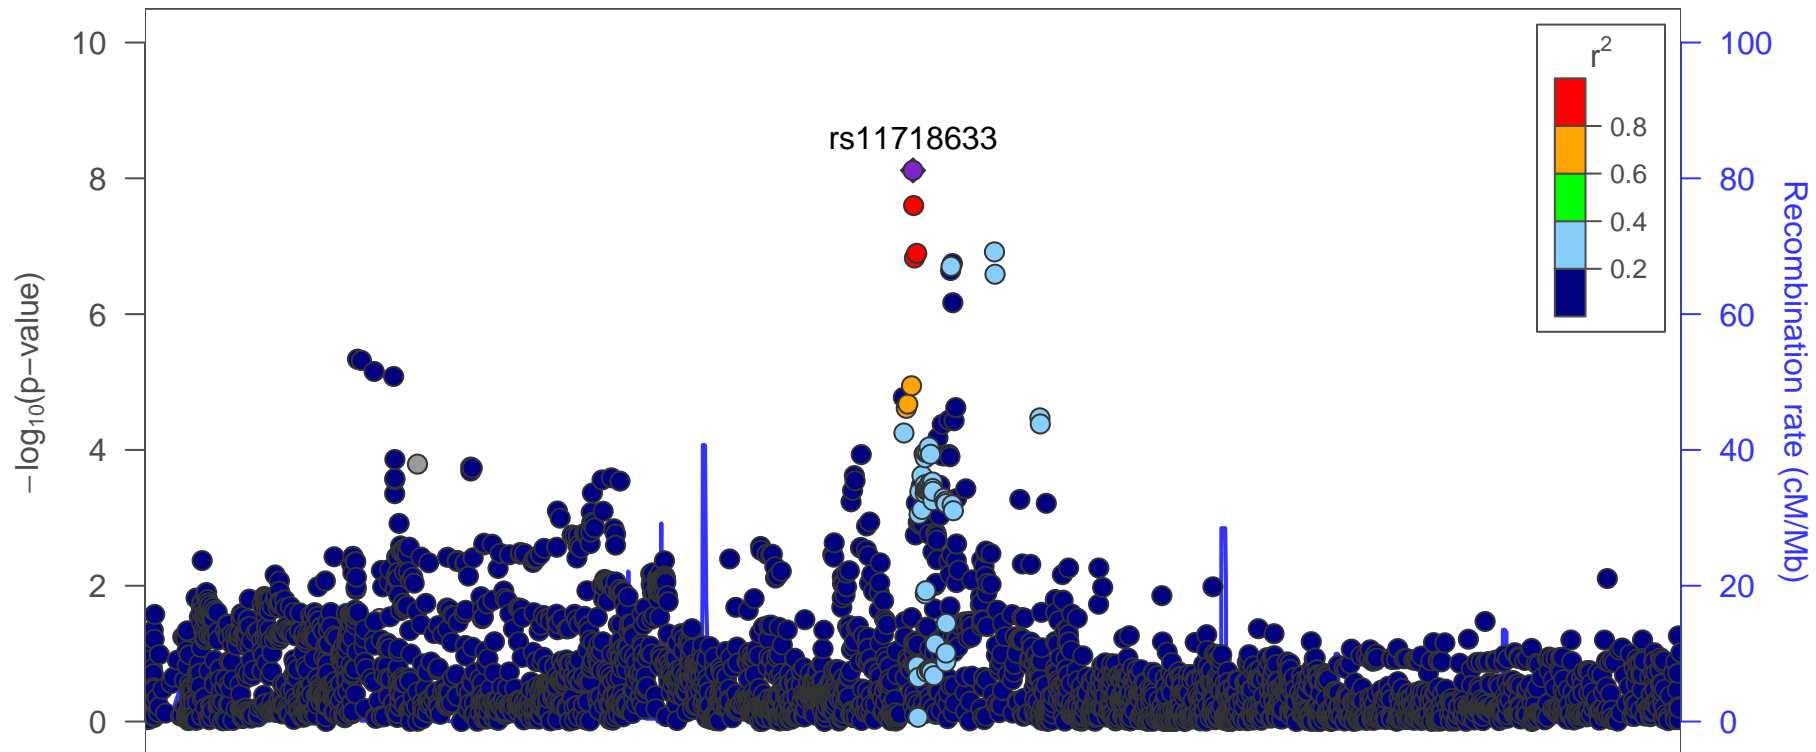

ite levels (HVA/5-HIAA ratio)      ↑ Metabolite levels

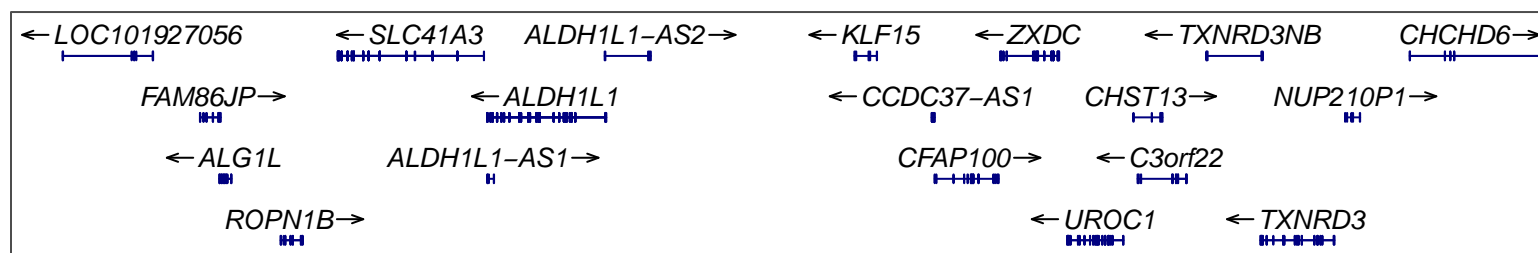

125.6      125.8      126      126.2      126.4

Position on chr3 (Mb)

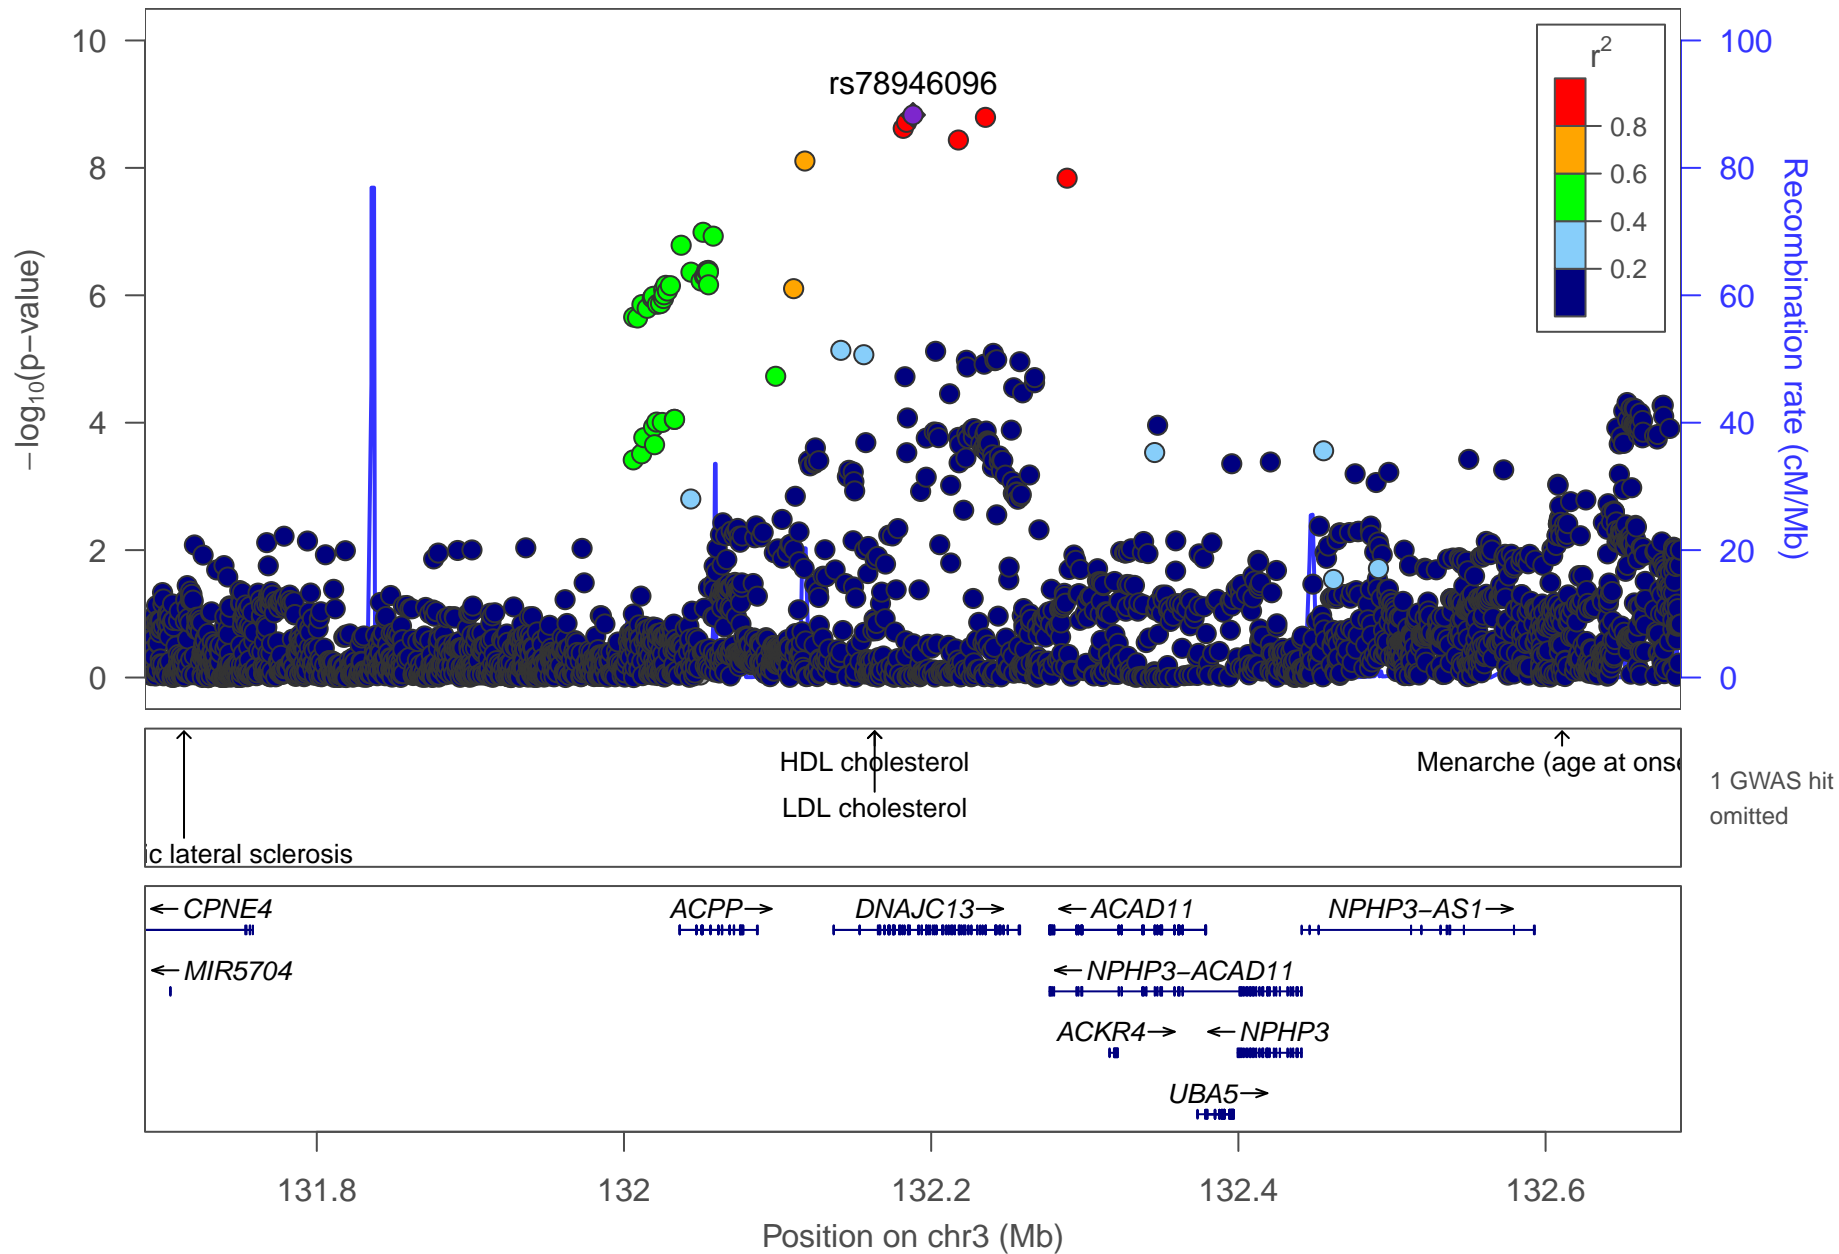

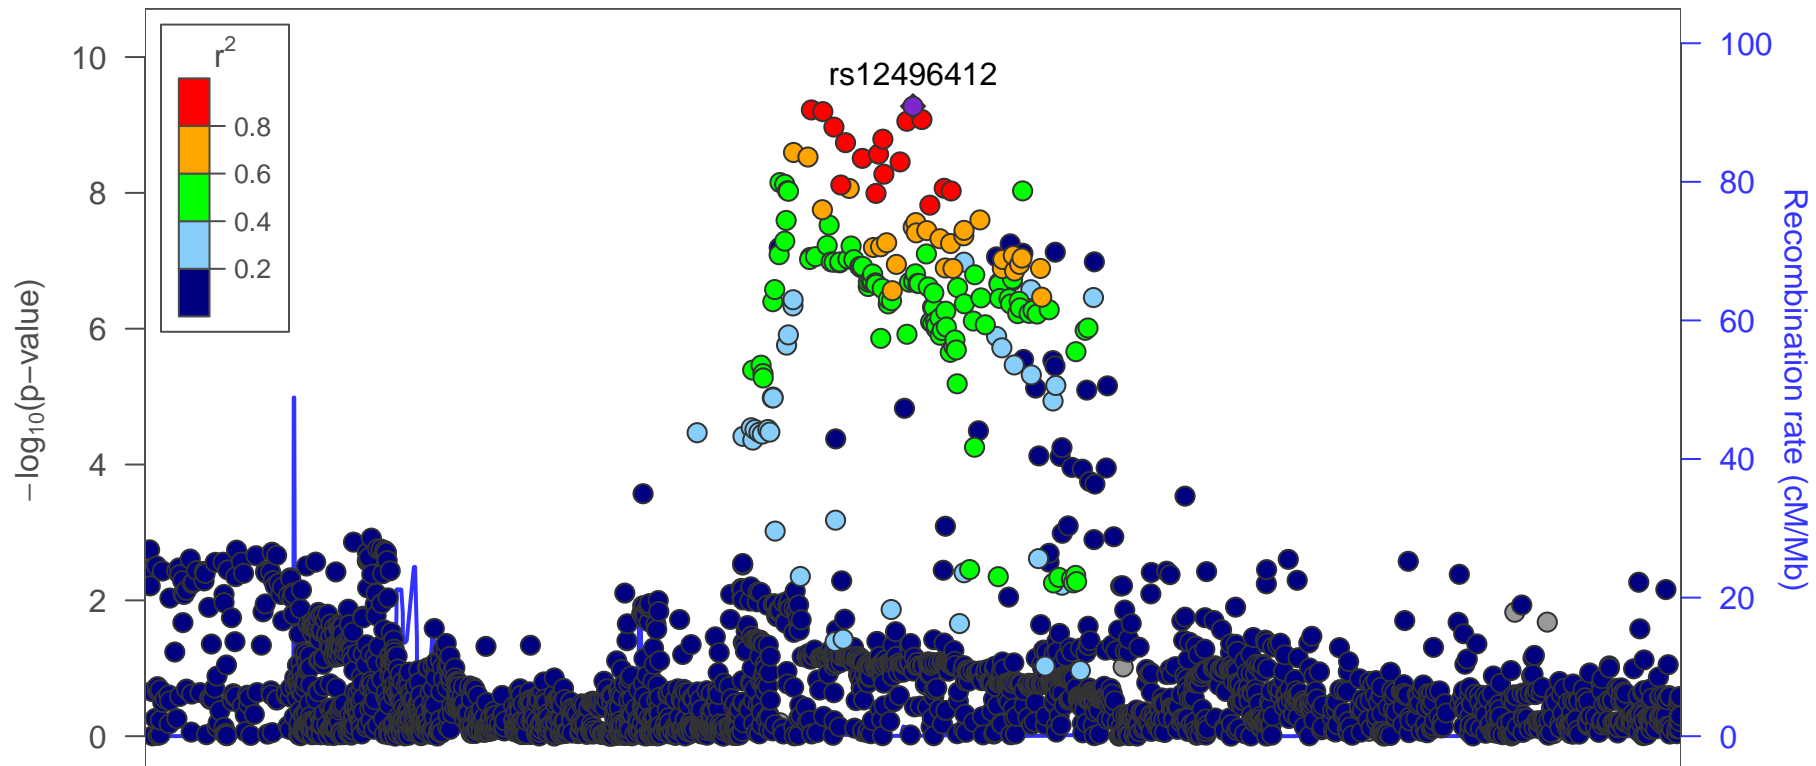

↑ Coronary artery calcification  
 ↑ Hepatitis C induced liver fibrosis  
 ↑ Chronic kidney disease  
 ↑ Food cell traits

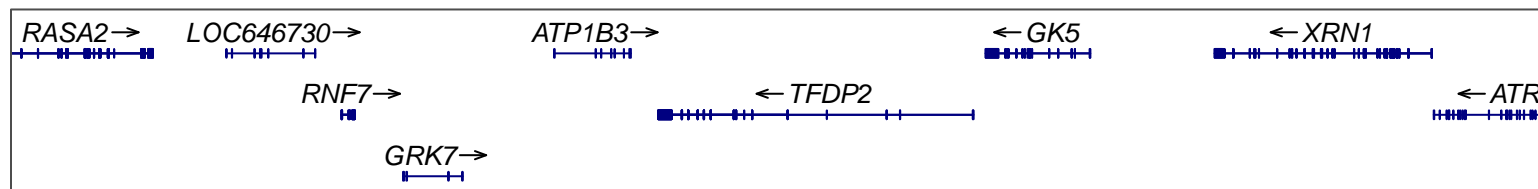

141.4                      141.6                      141.8                      142                      142.2  
 Position on chr3 (Mb)



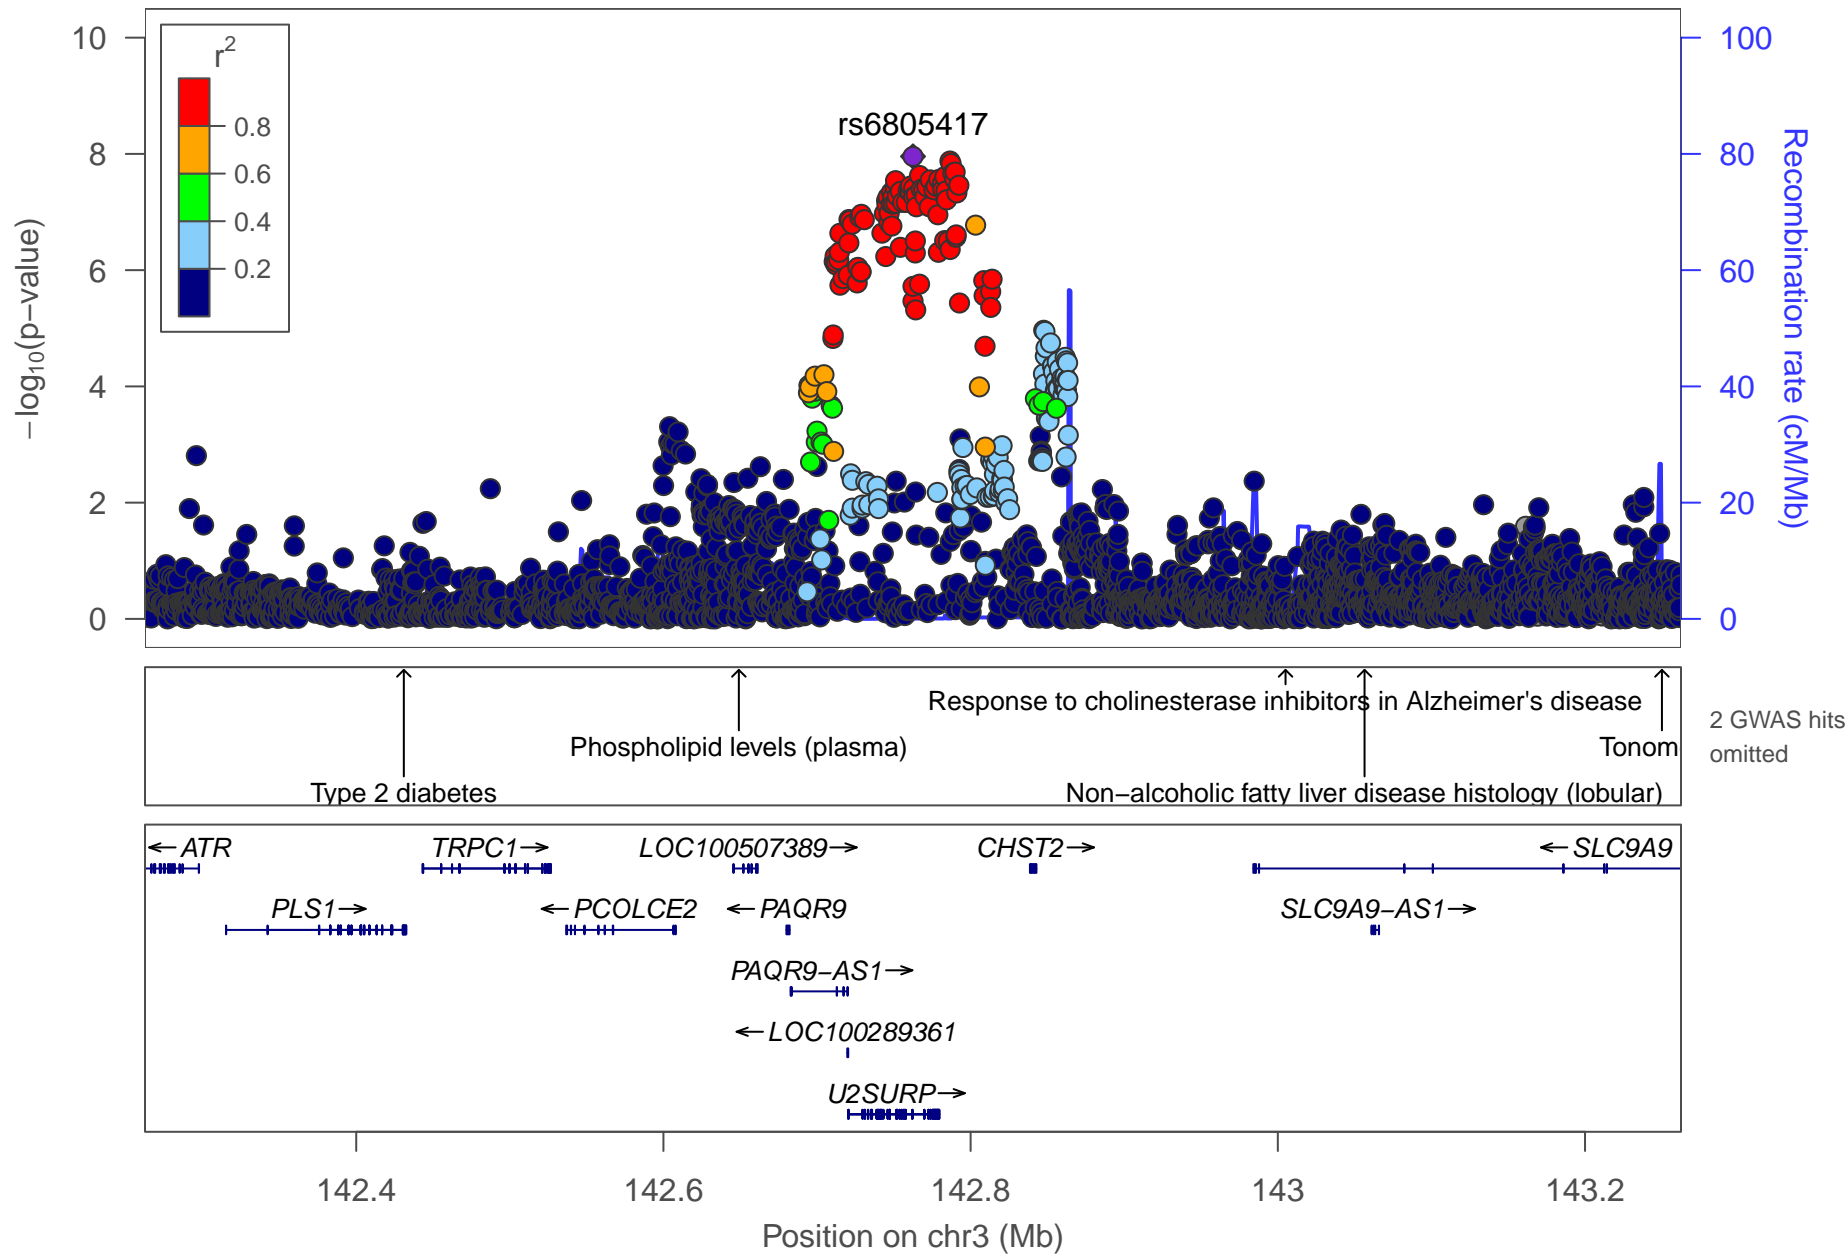

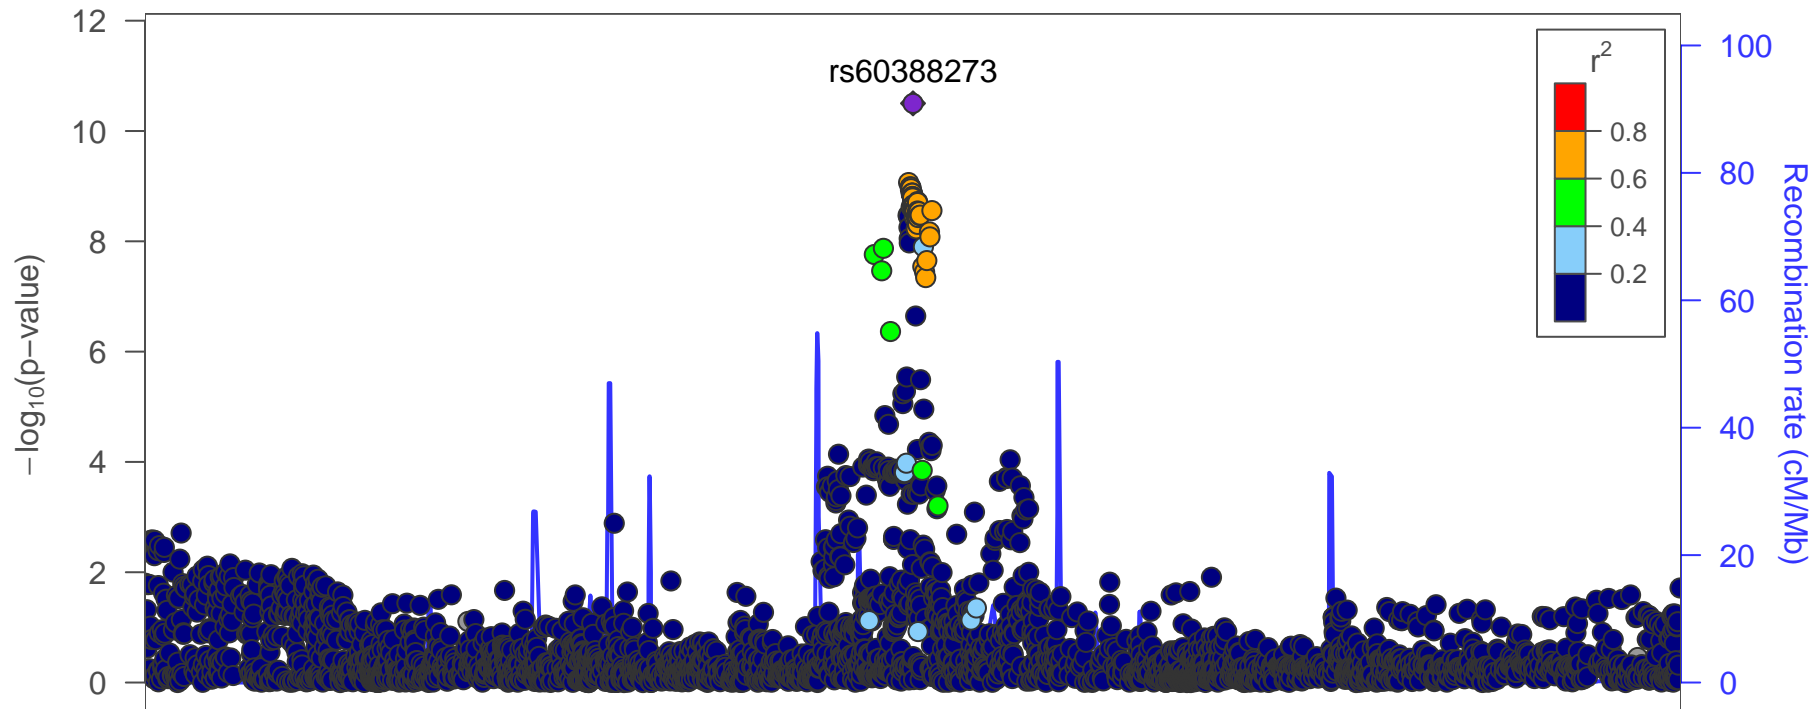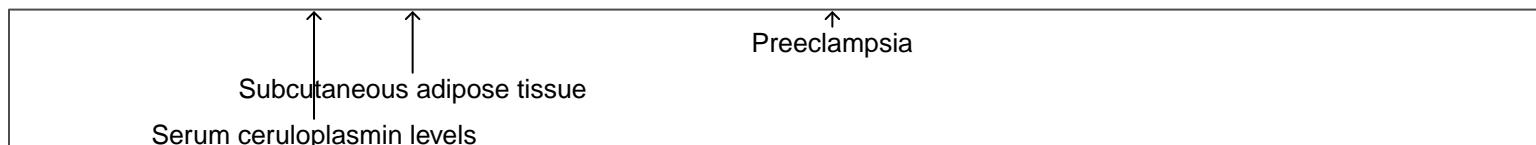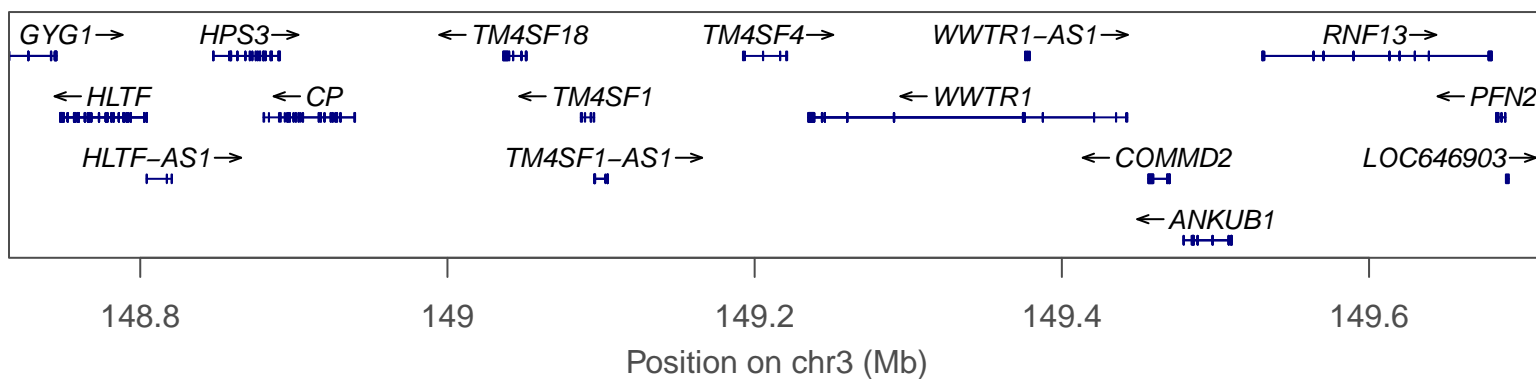

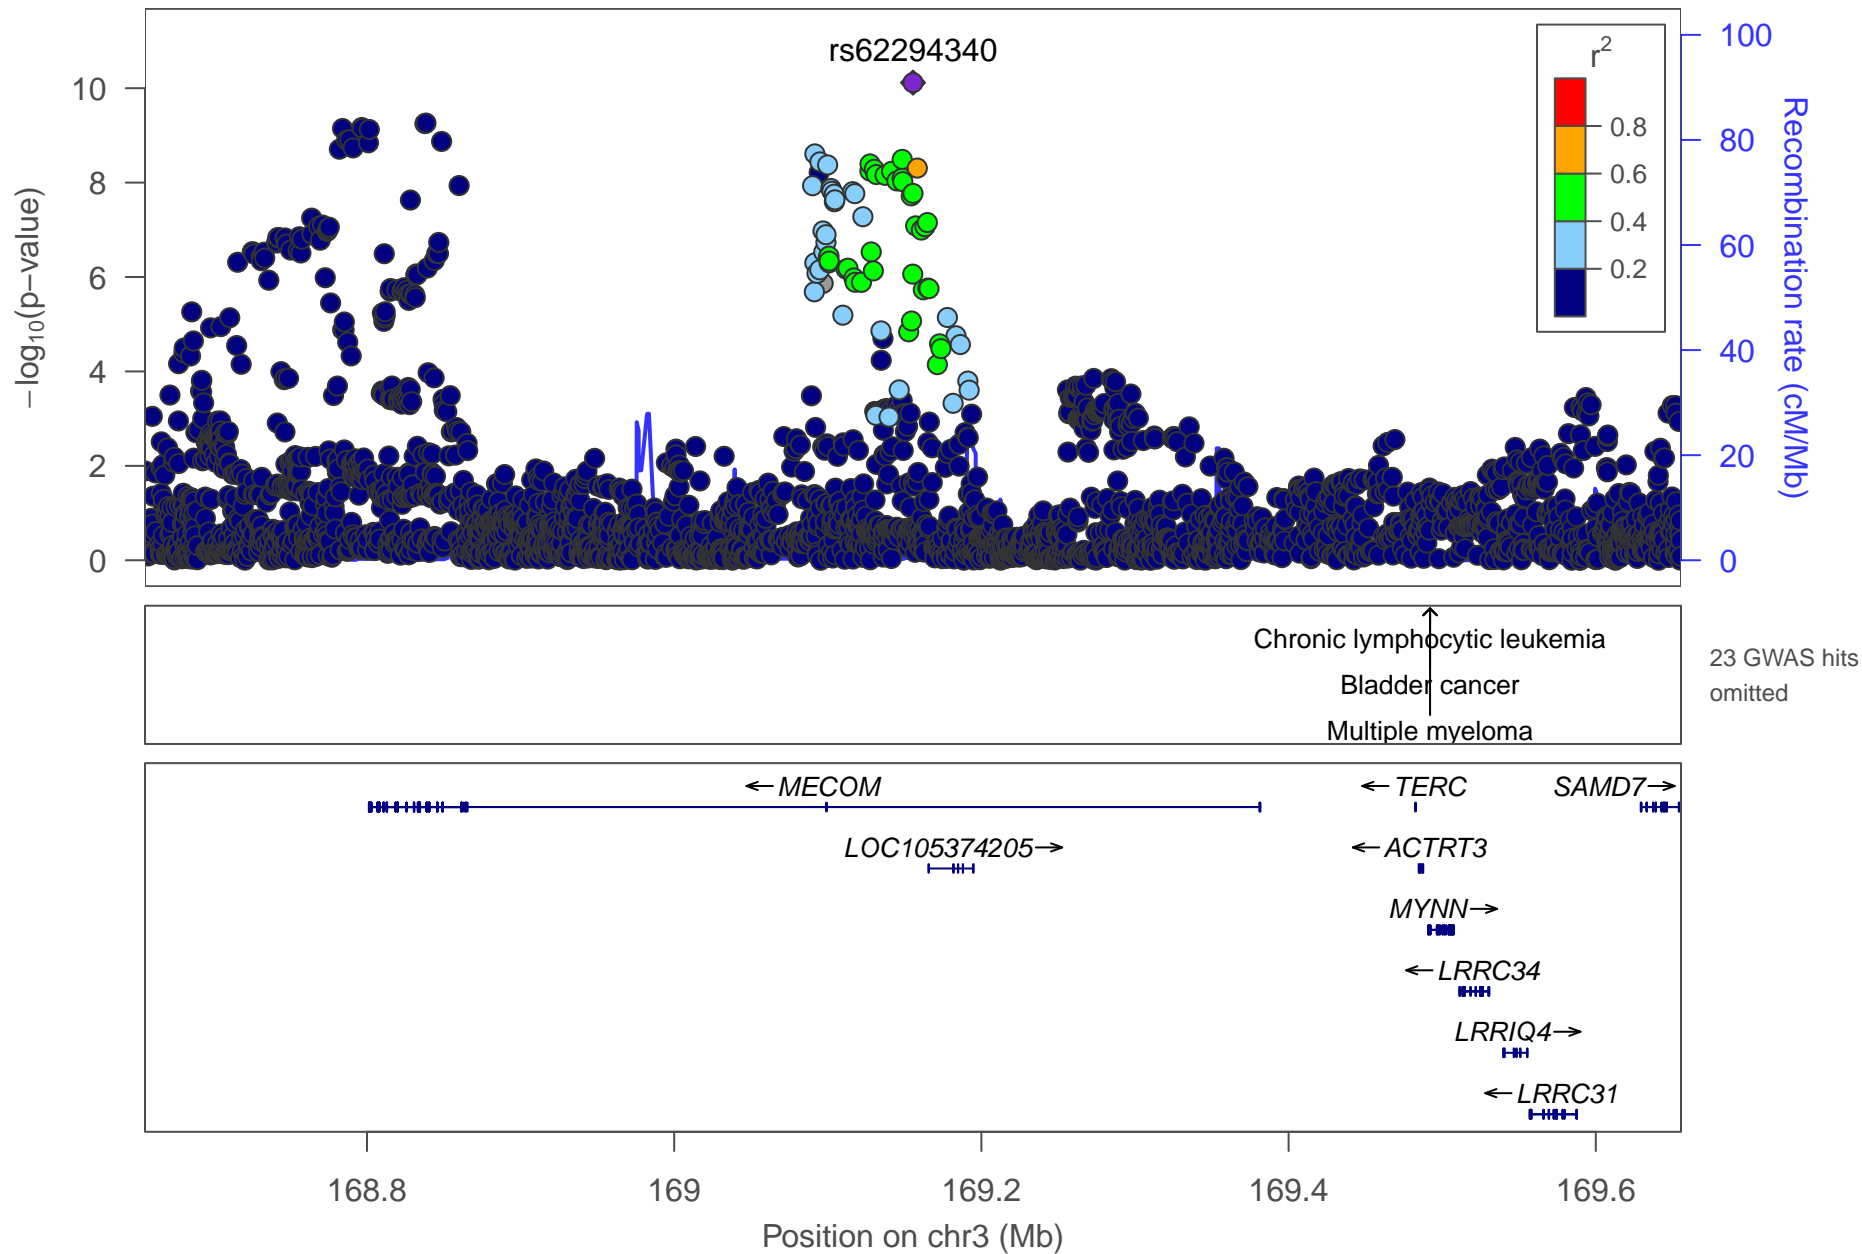

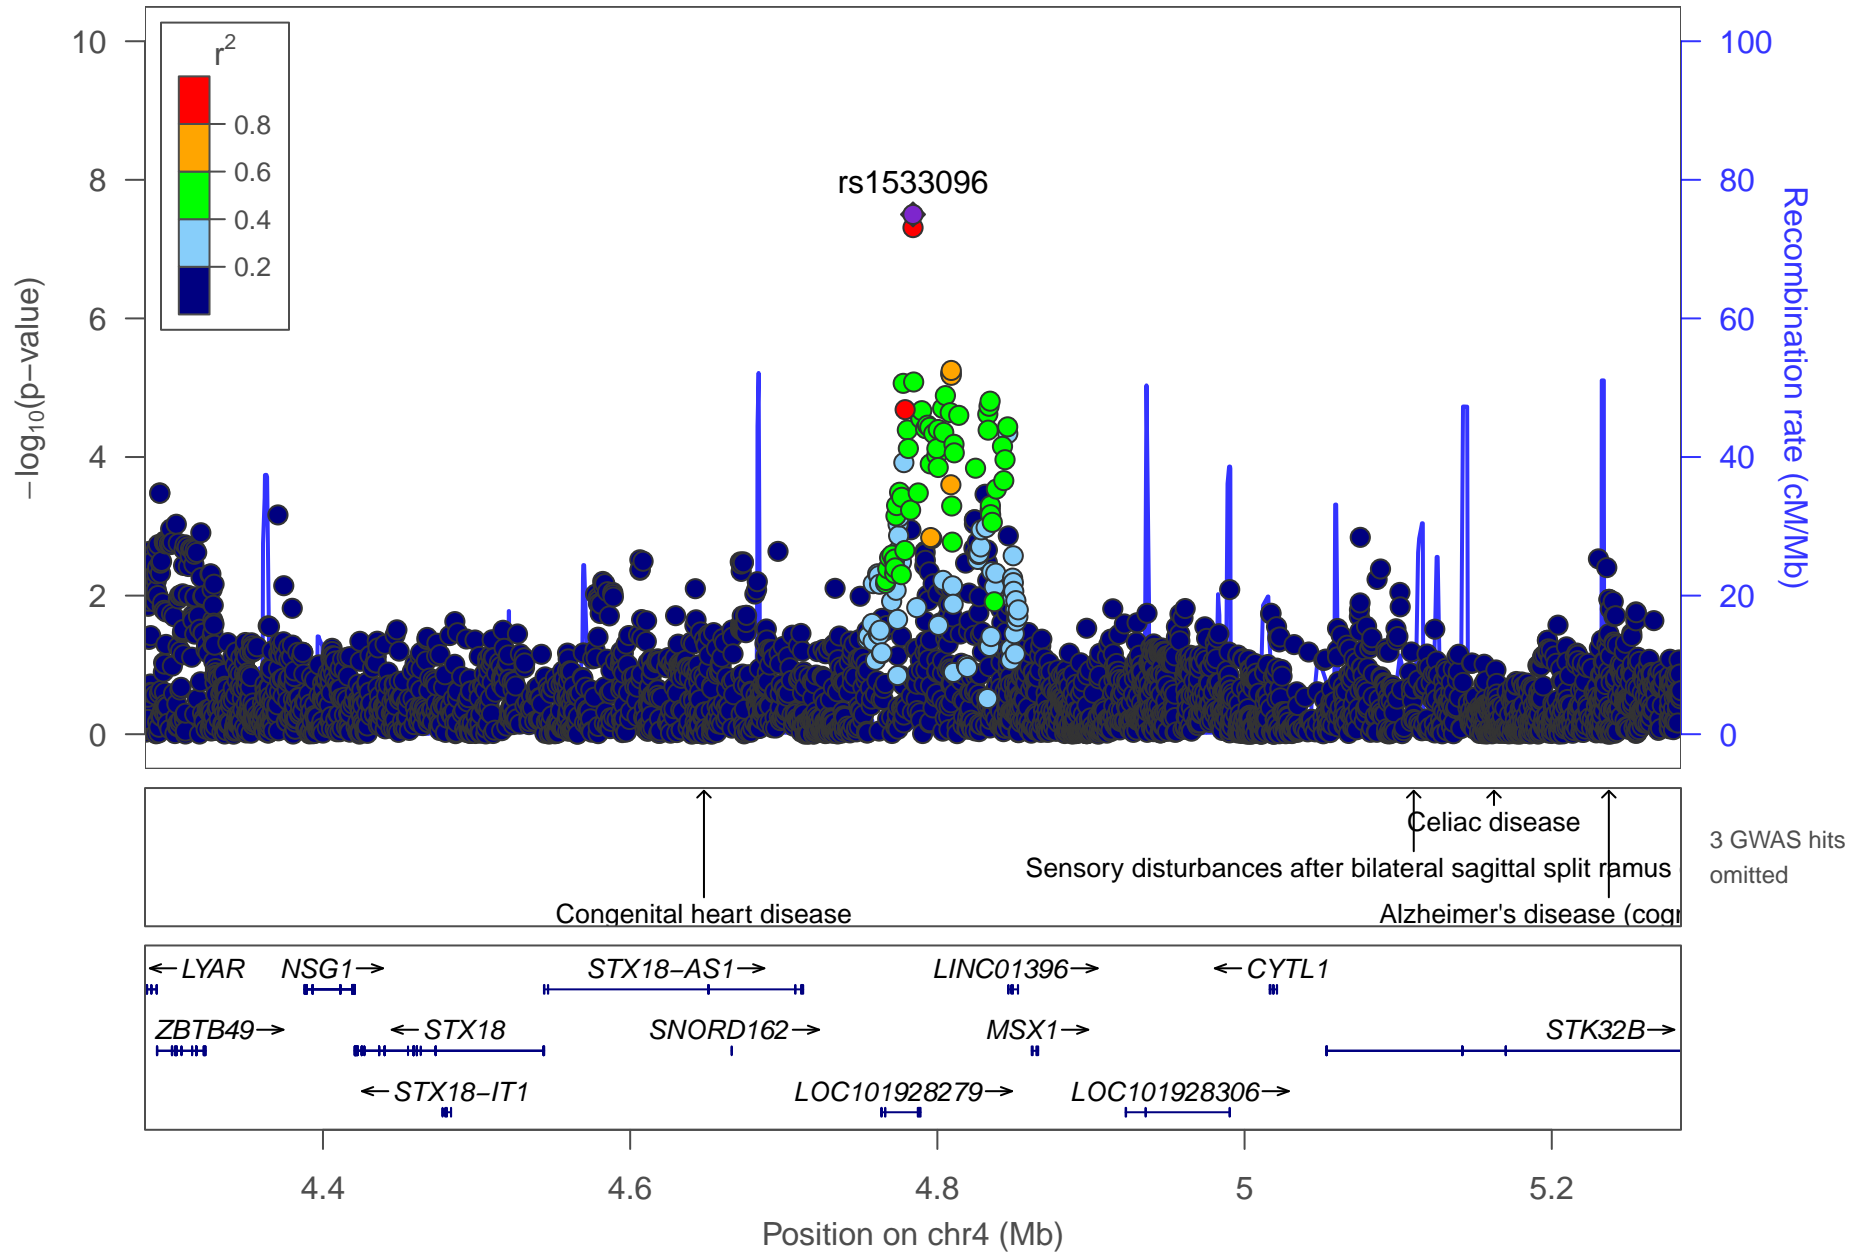

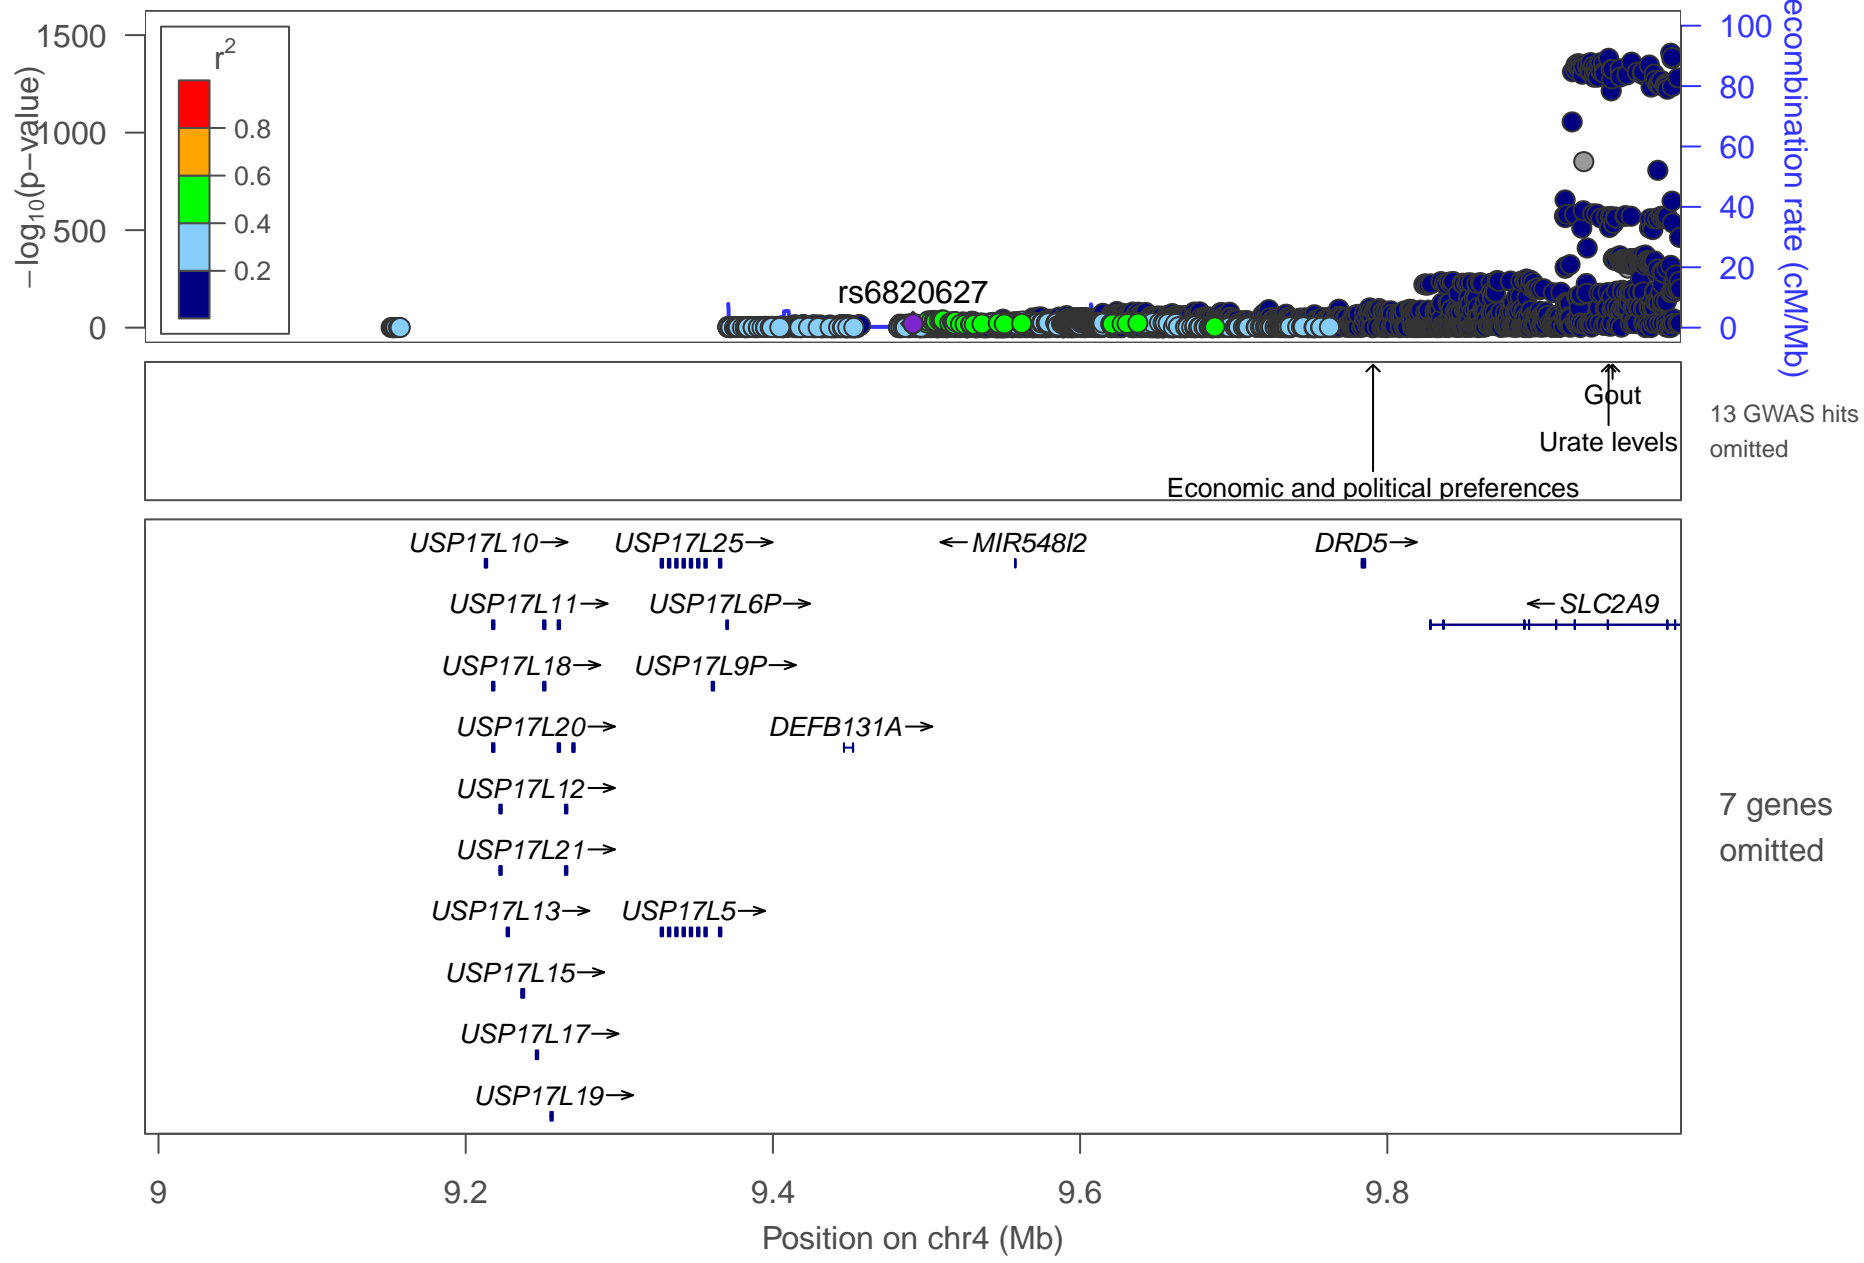

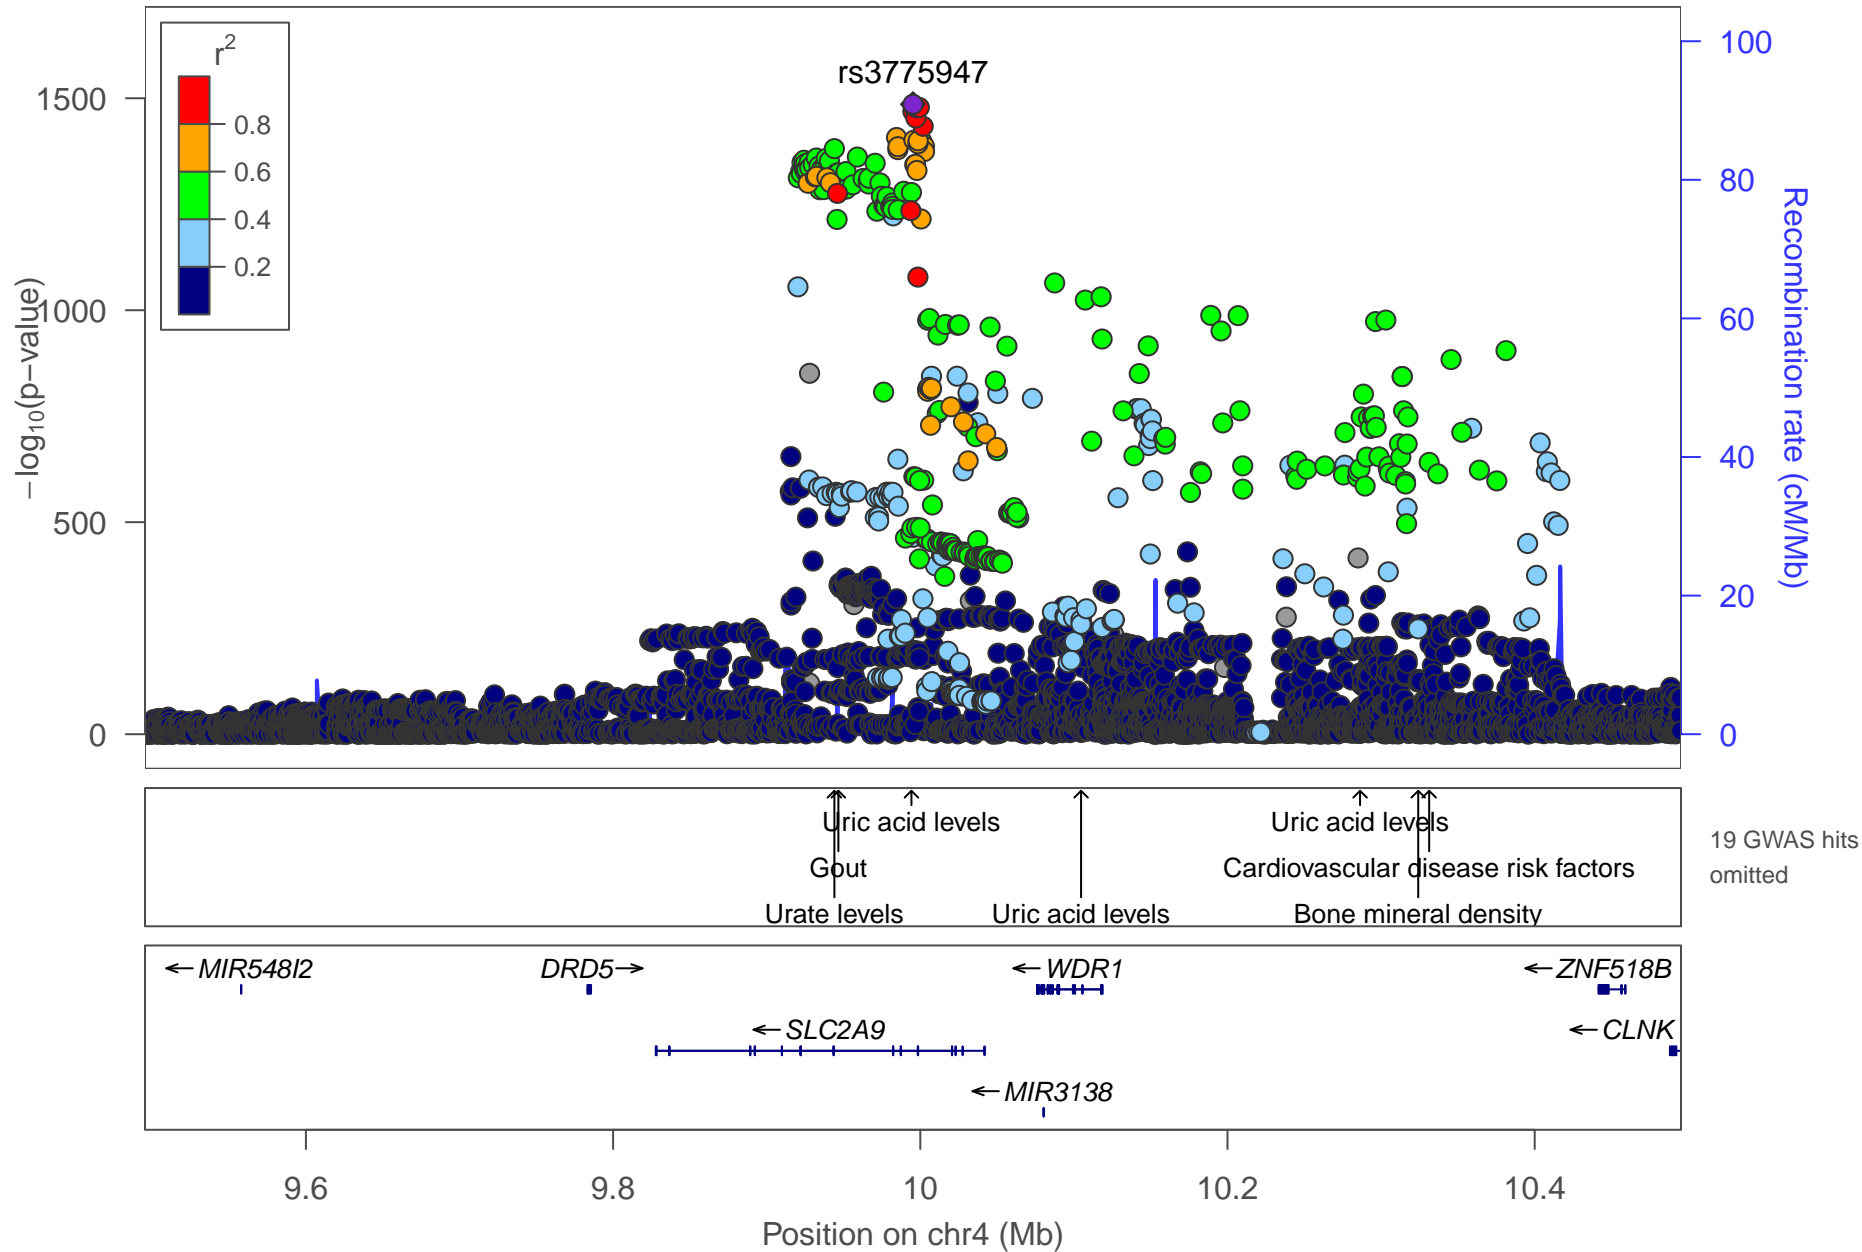

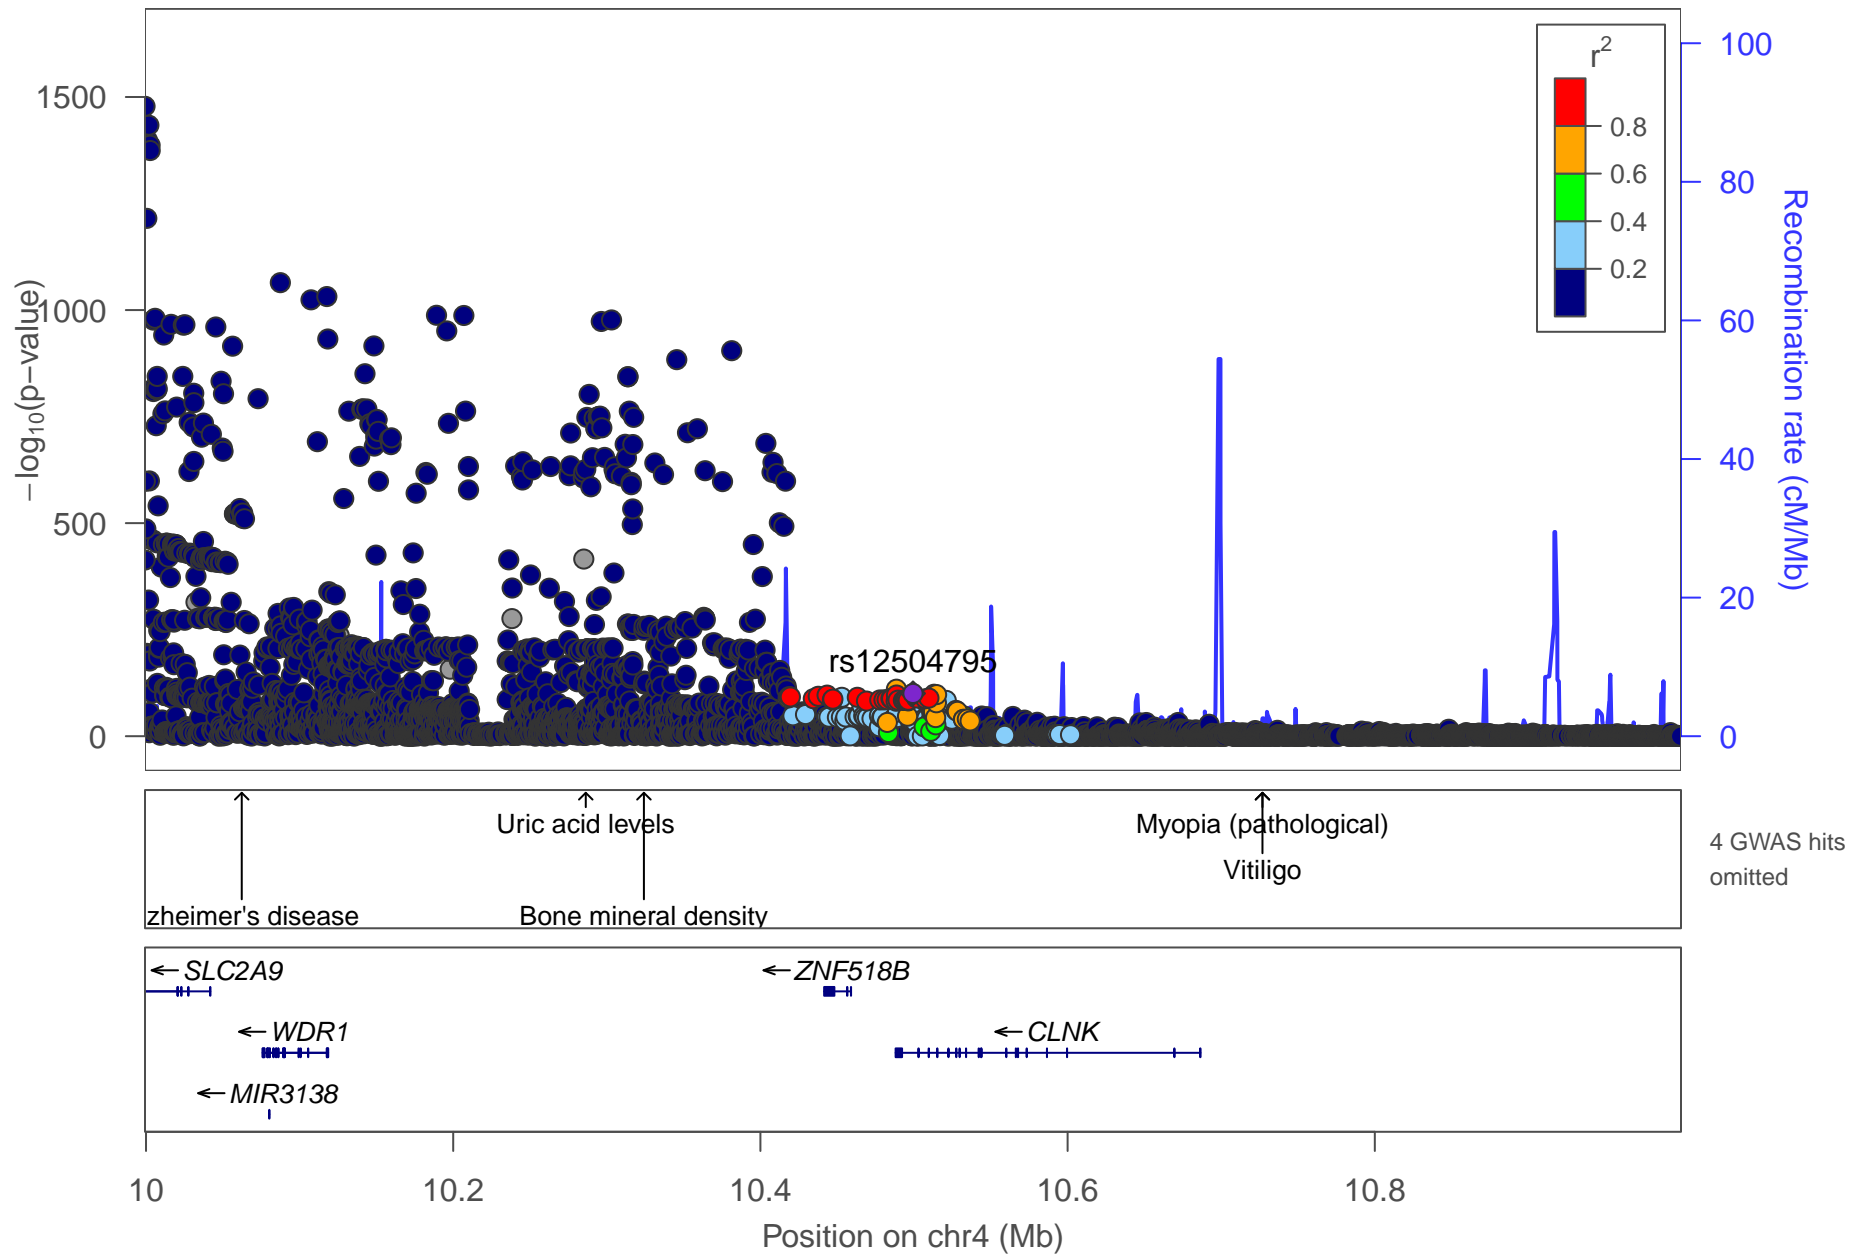

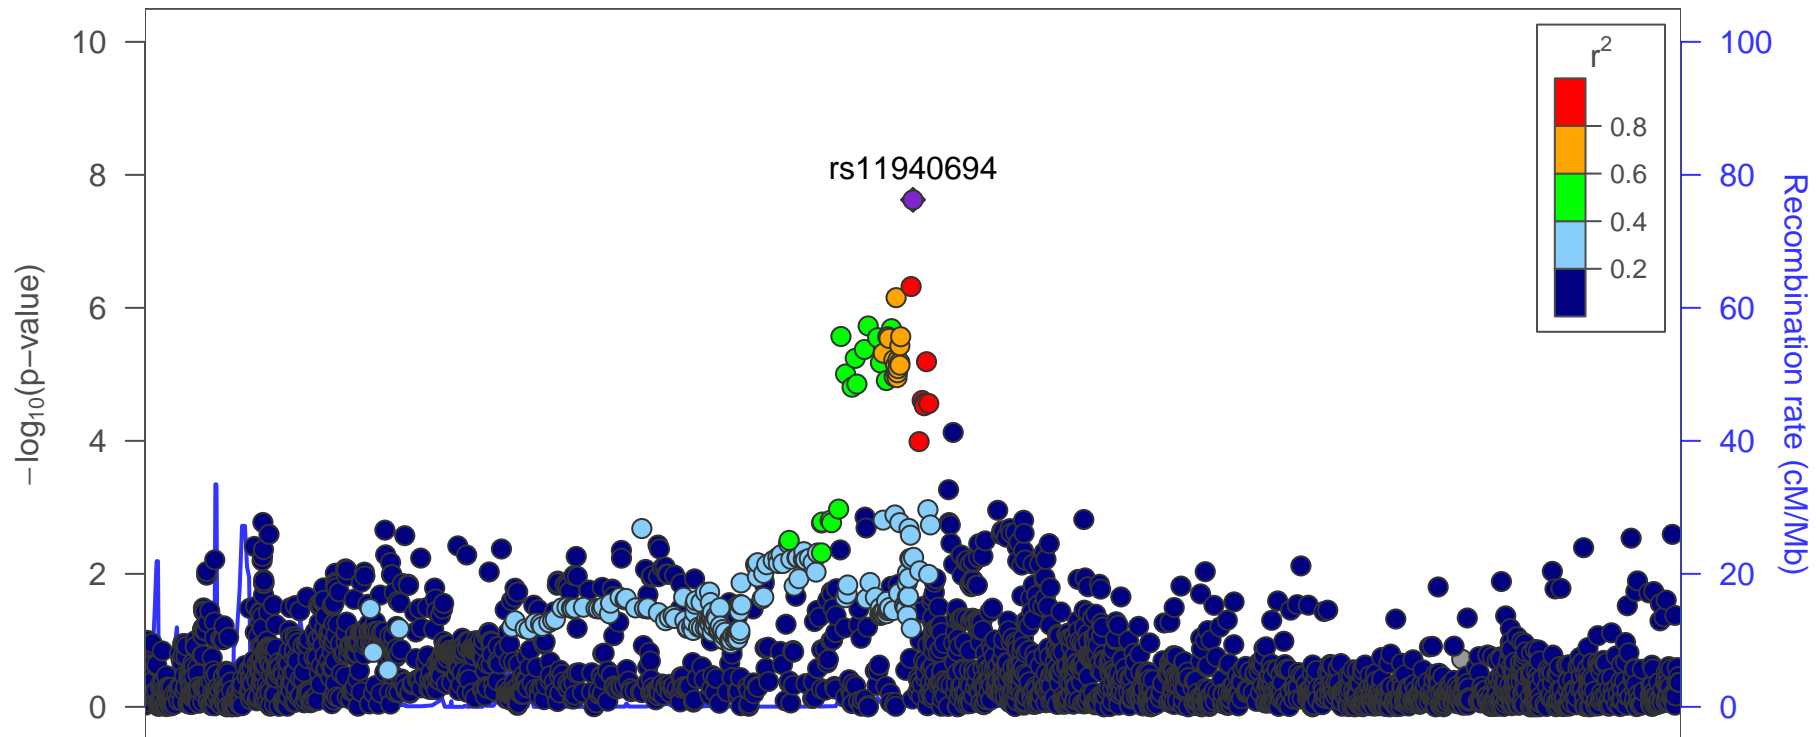

↑  
 Asthma (childhood onset)

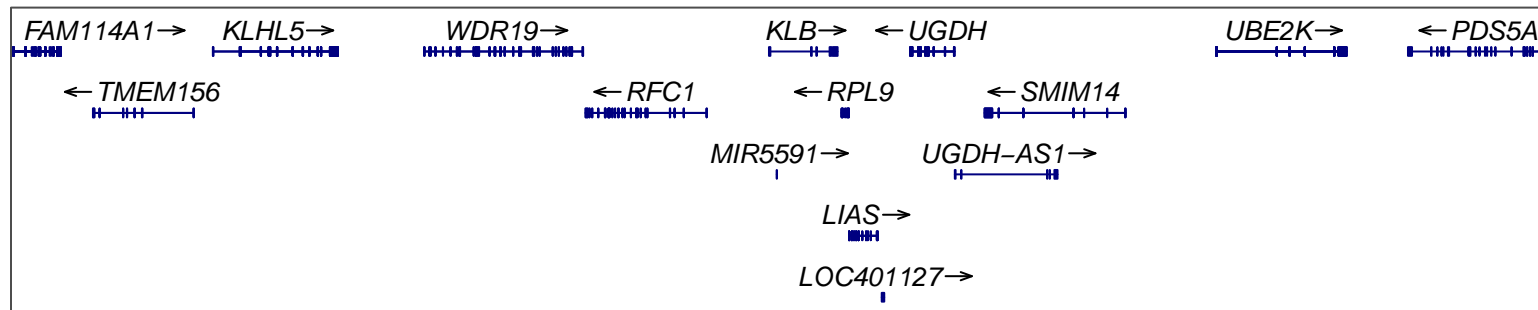

39                                      39.2                                      39.4                                      39.6                                      39.8

Position on chr4 (Mb)



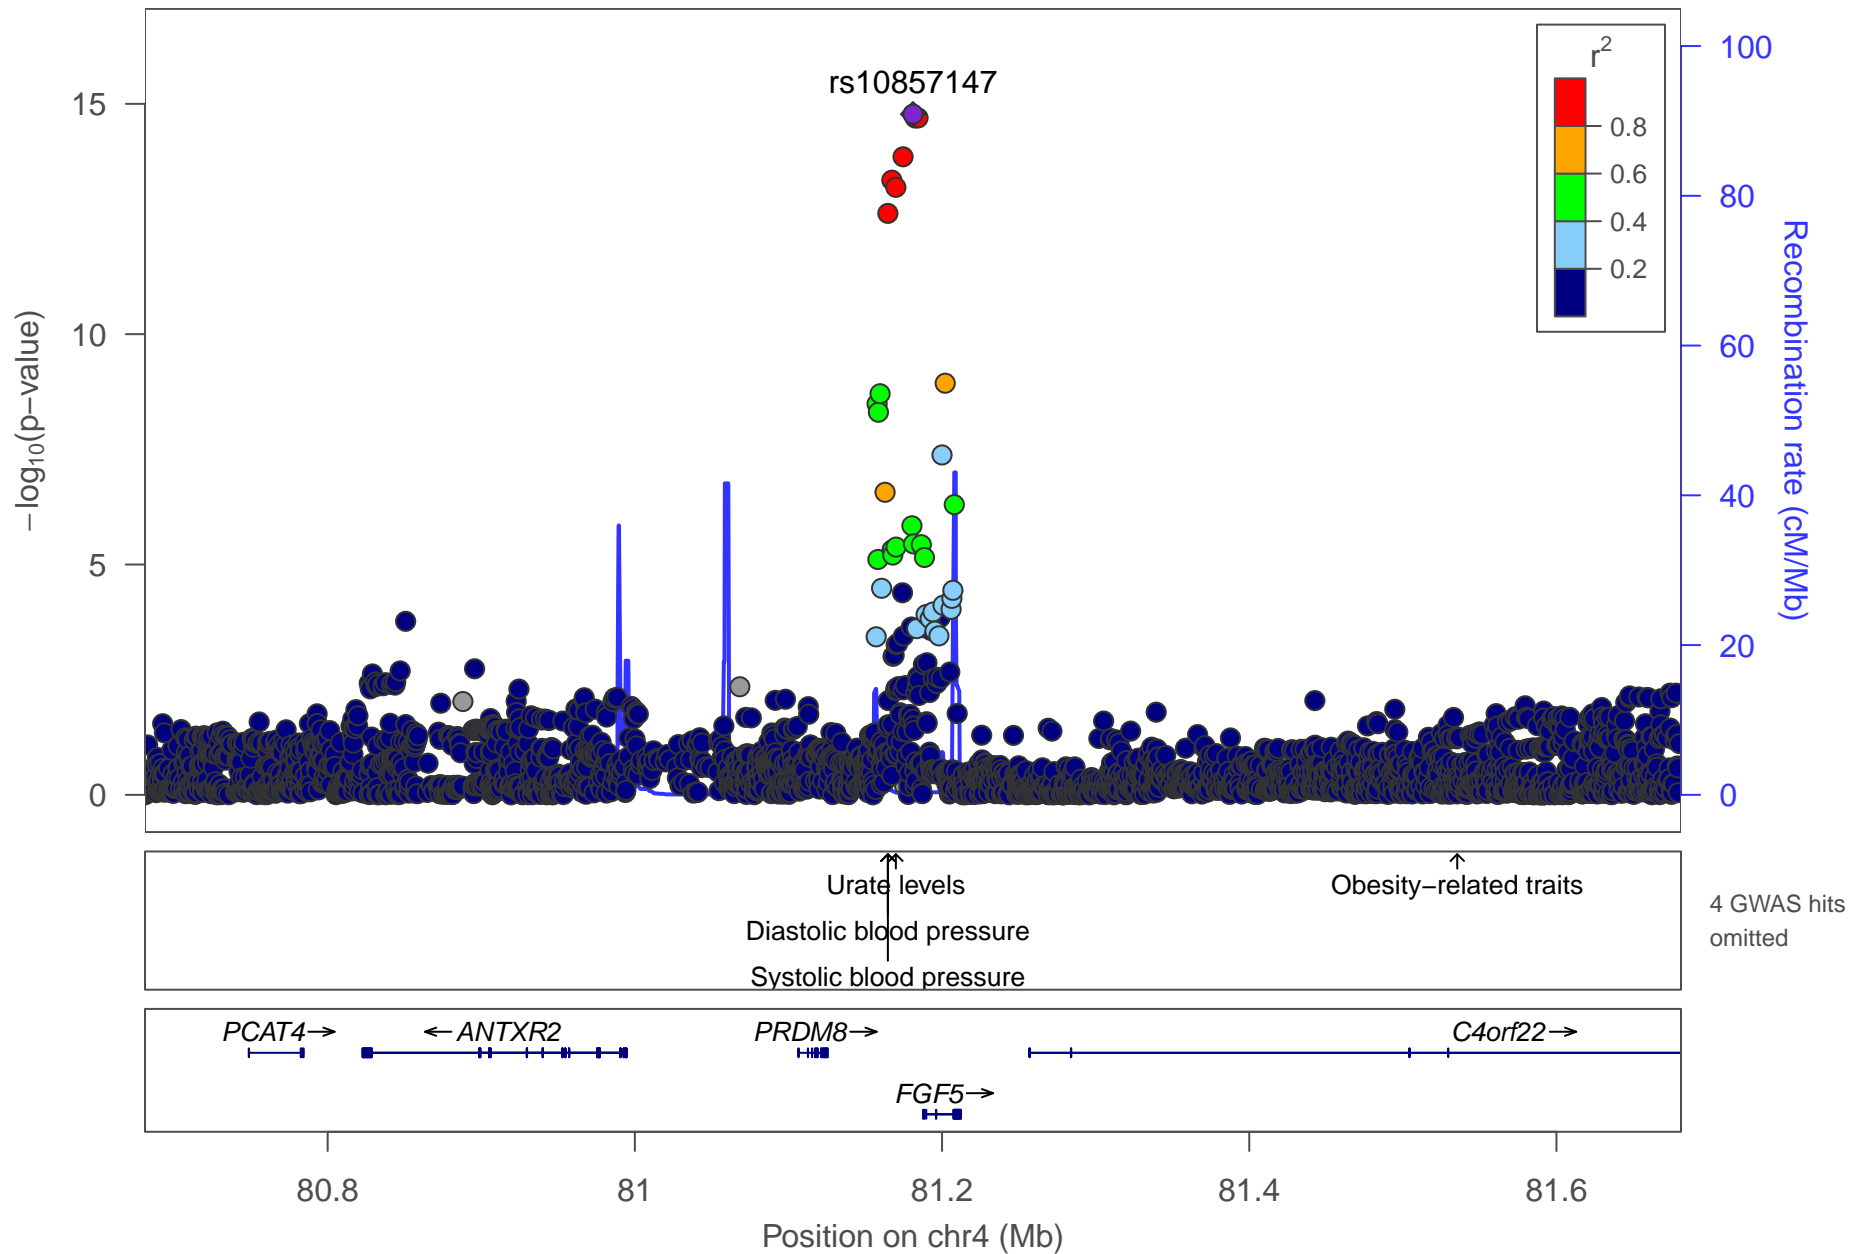

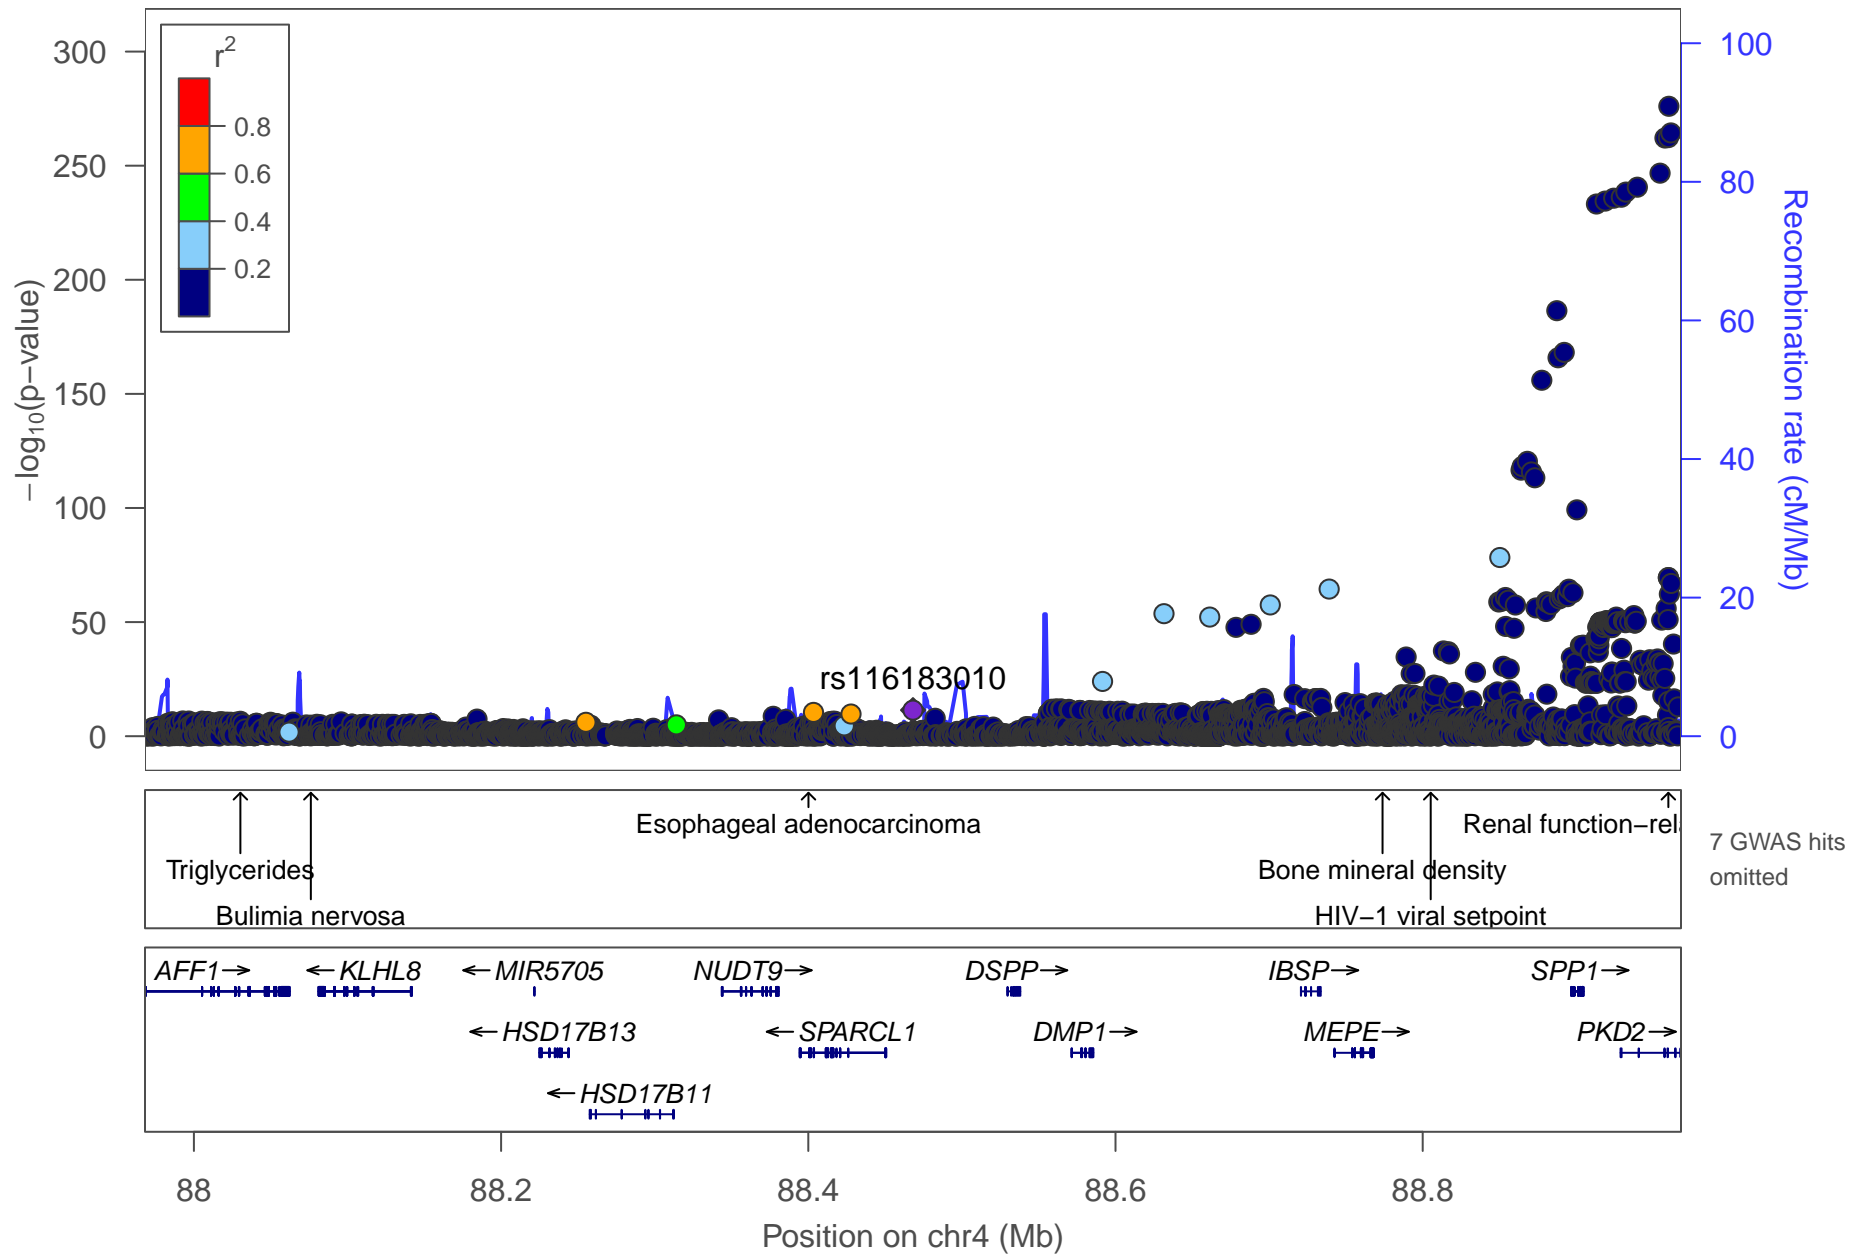

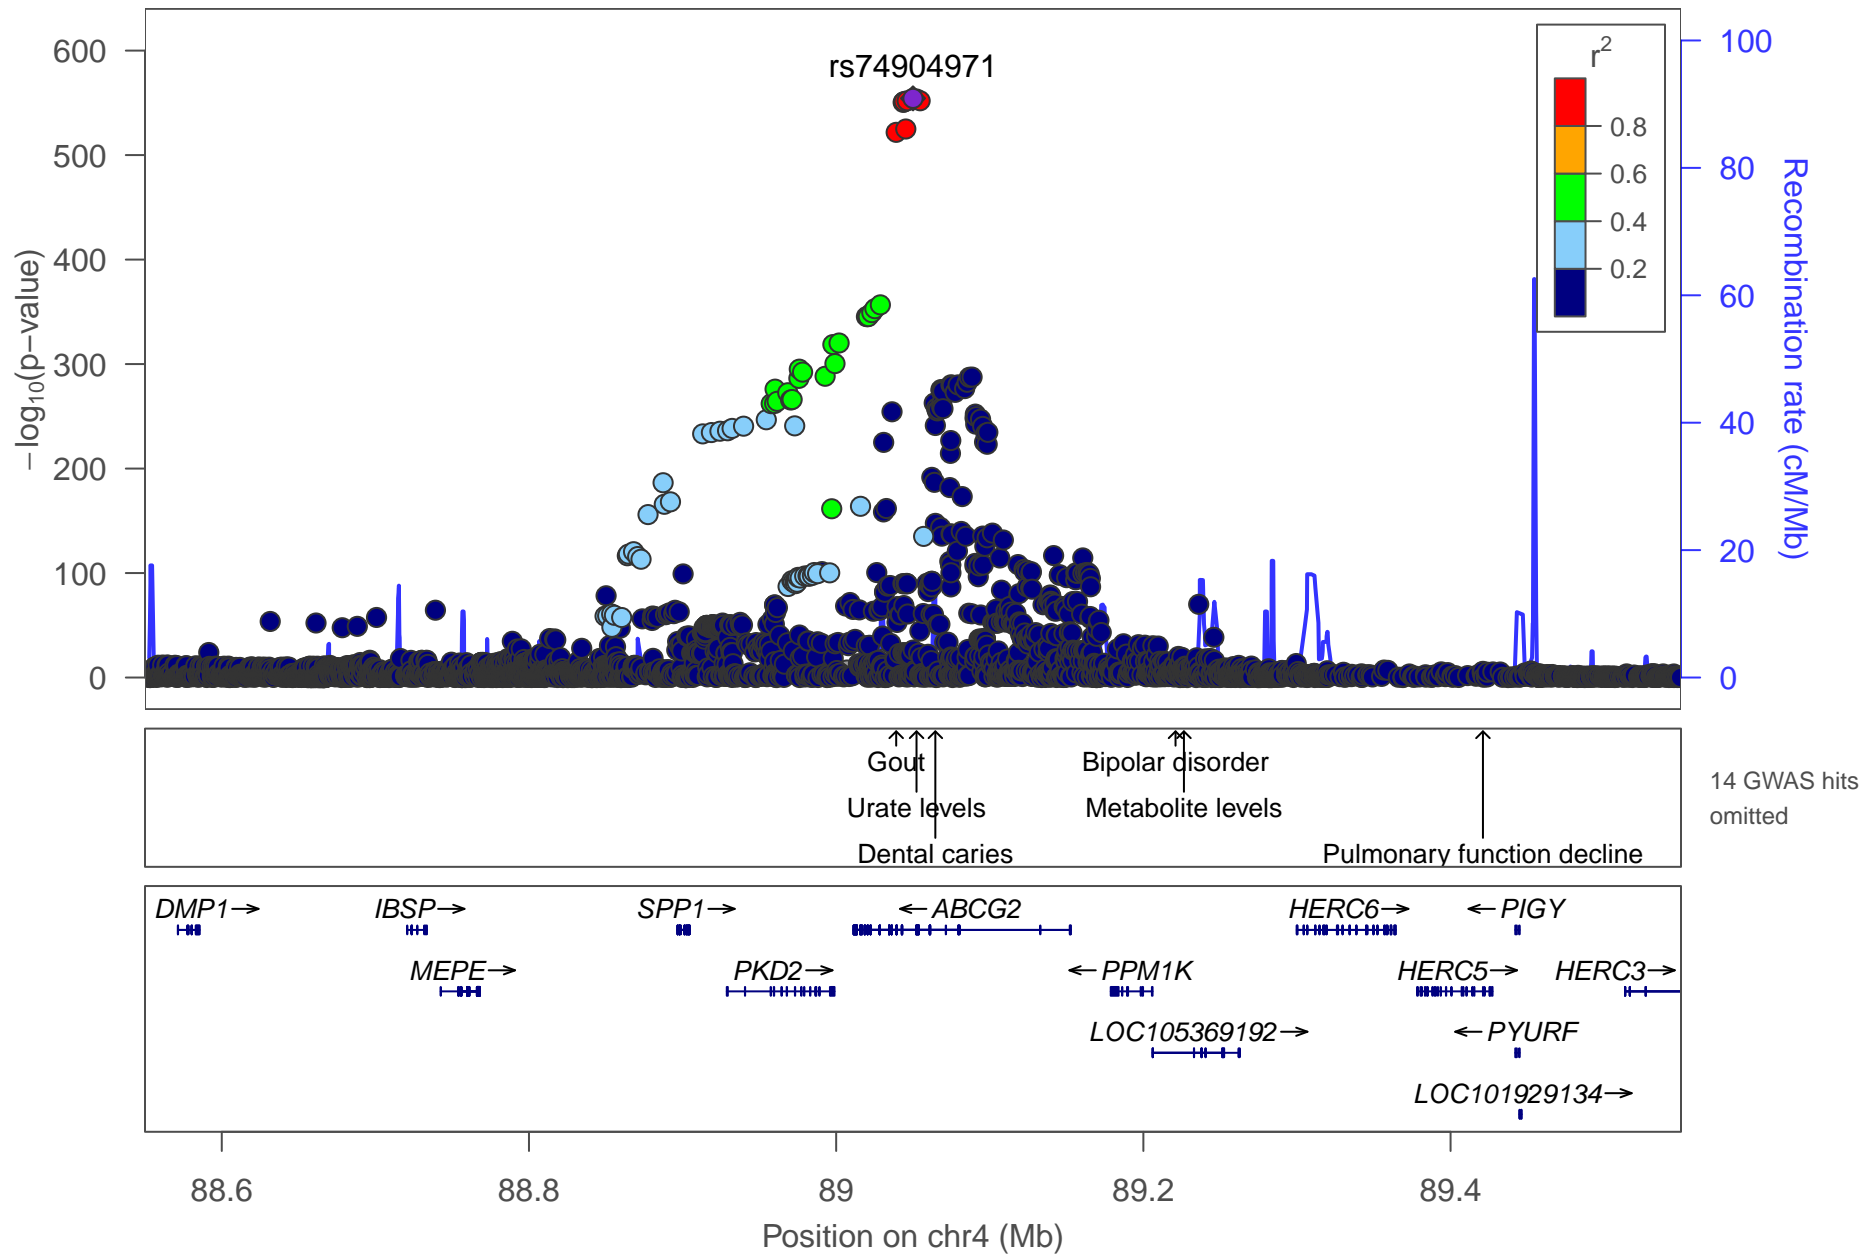

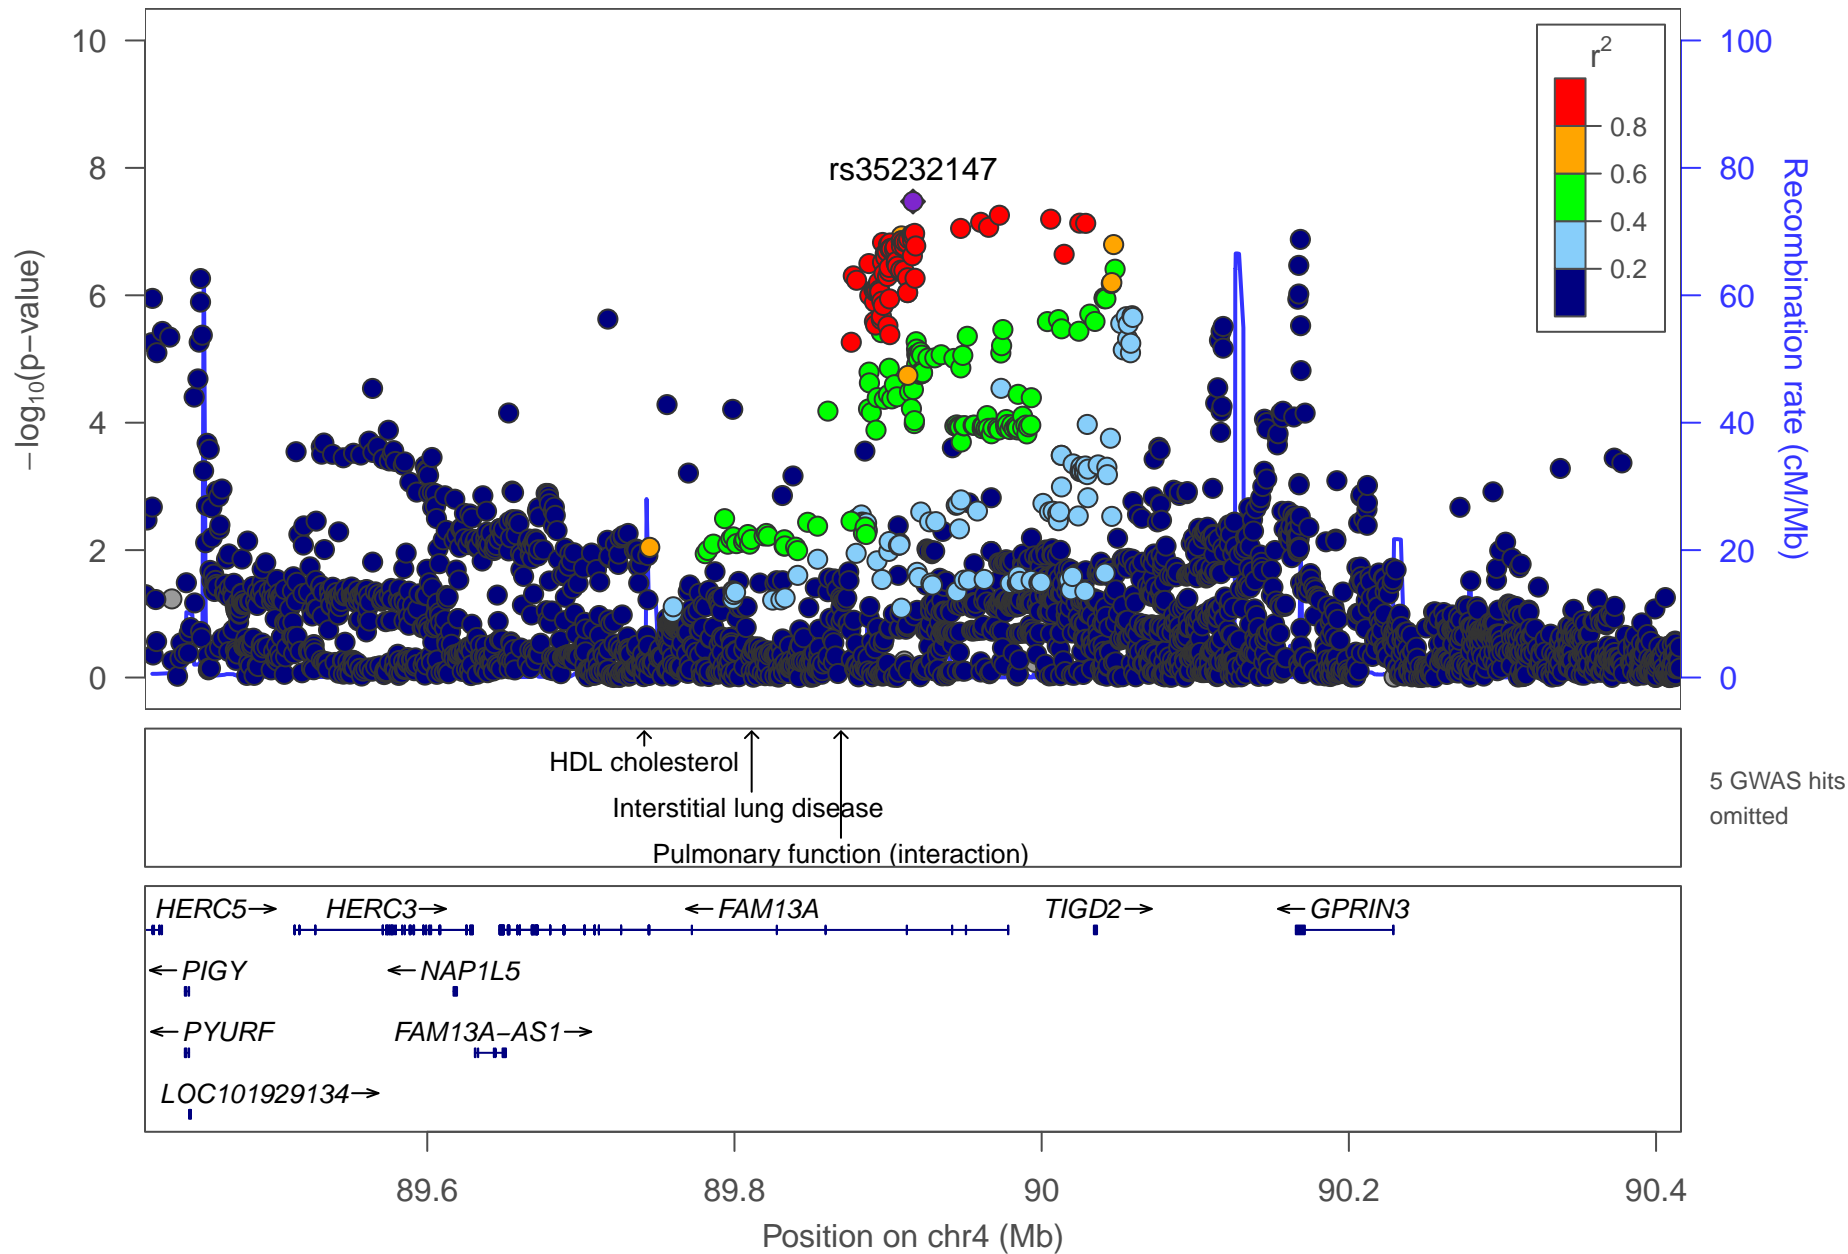

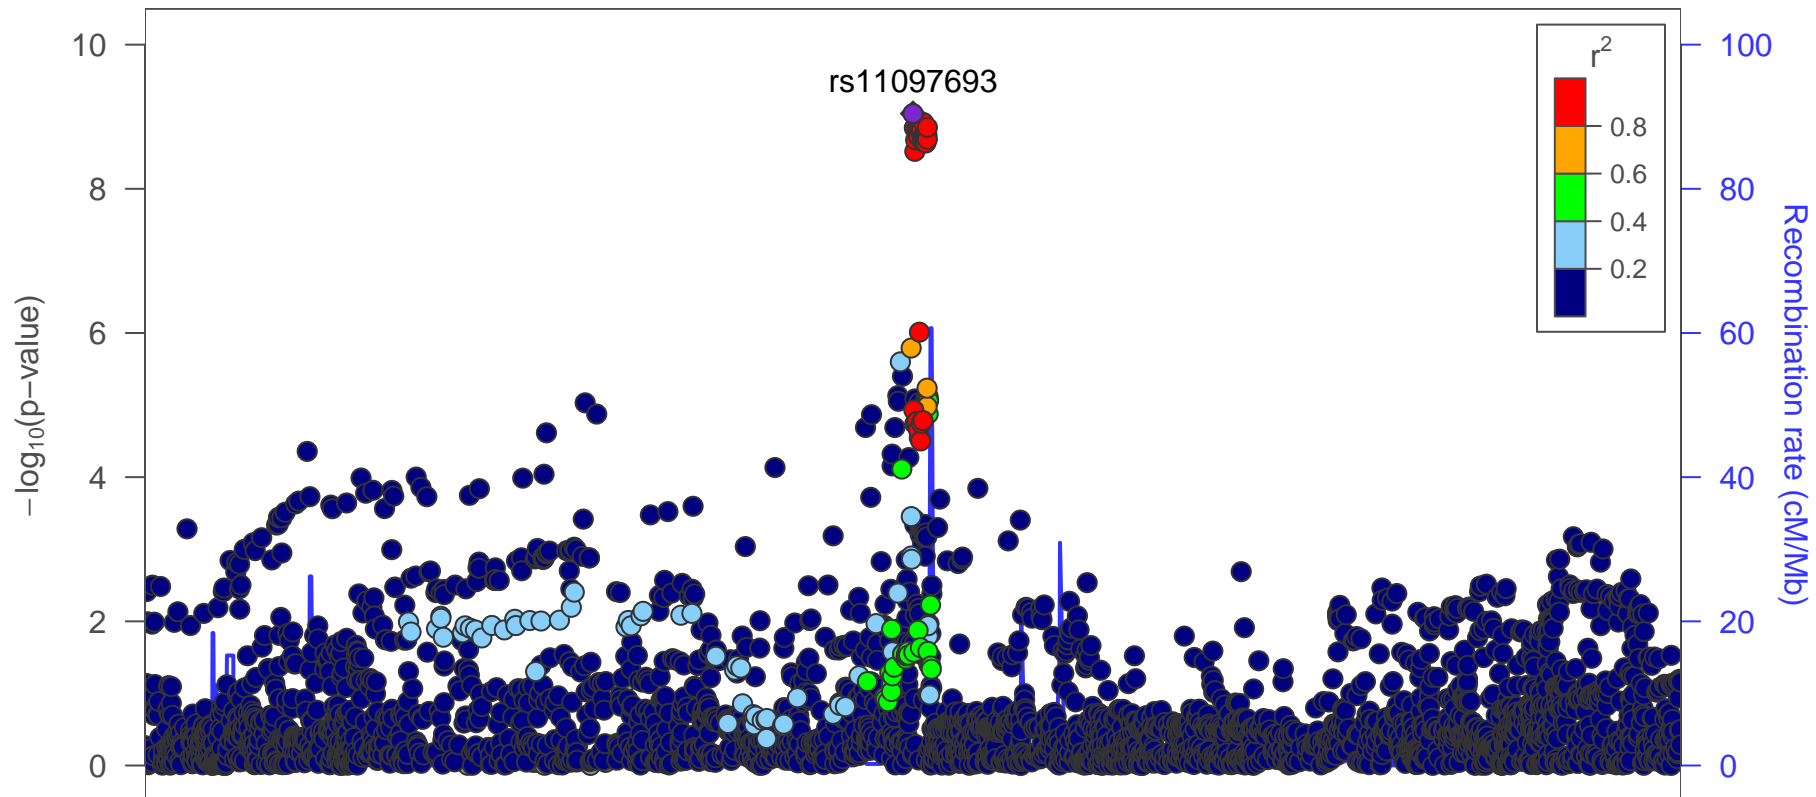

↑  
 nse to antipsychotic treatment

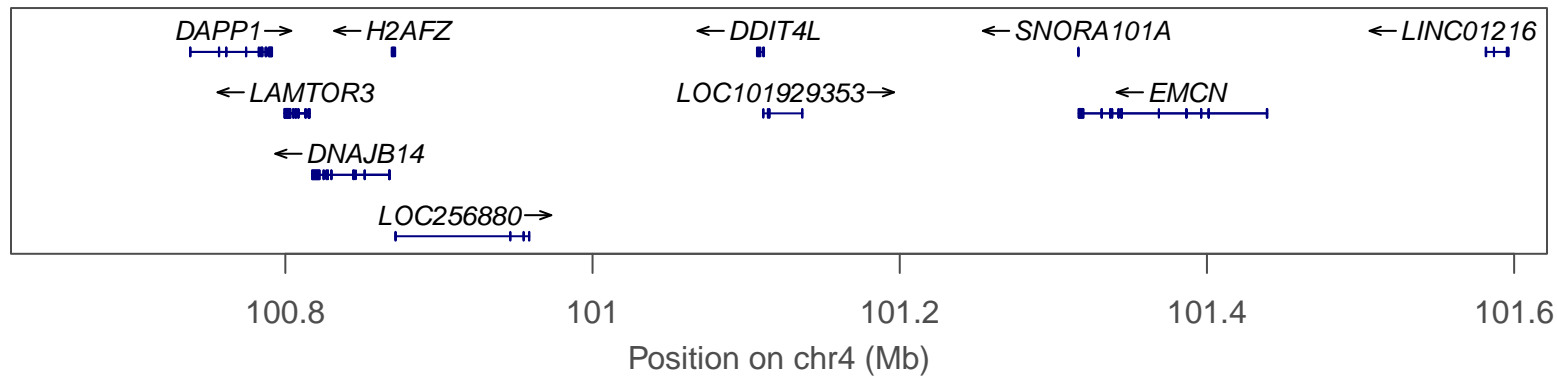

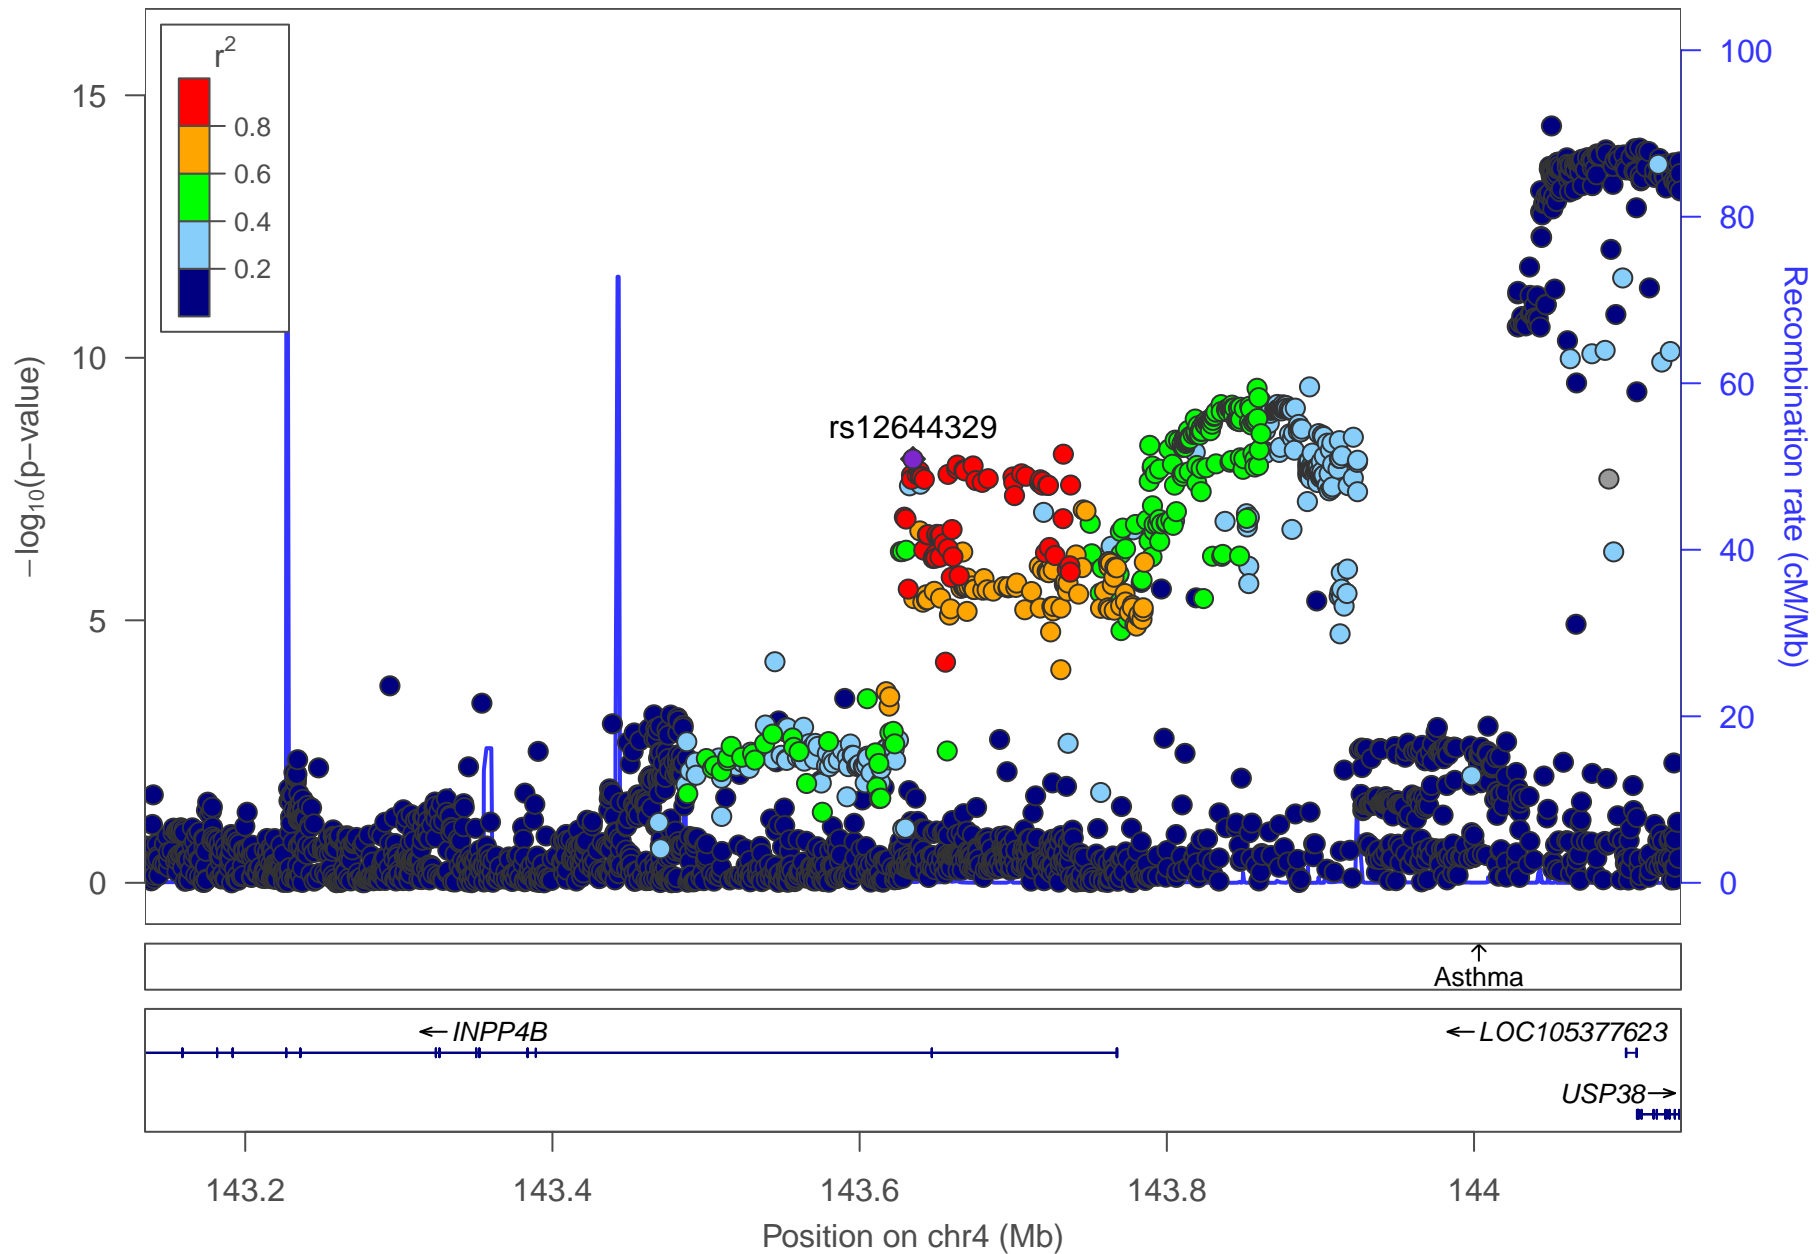

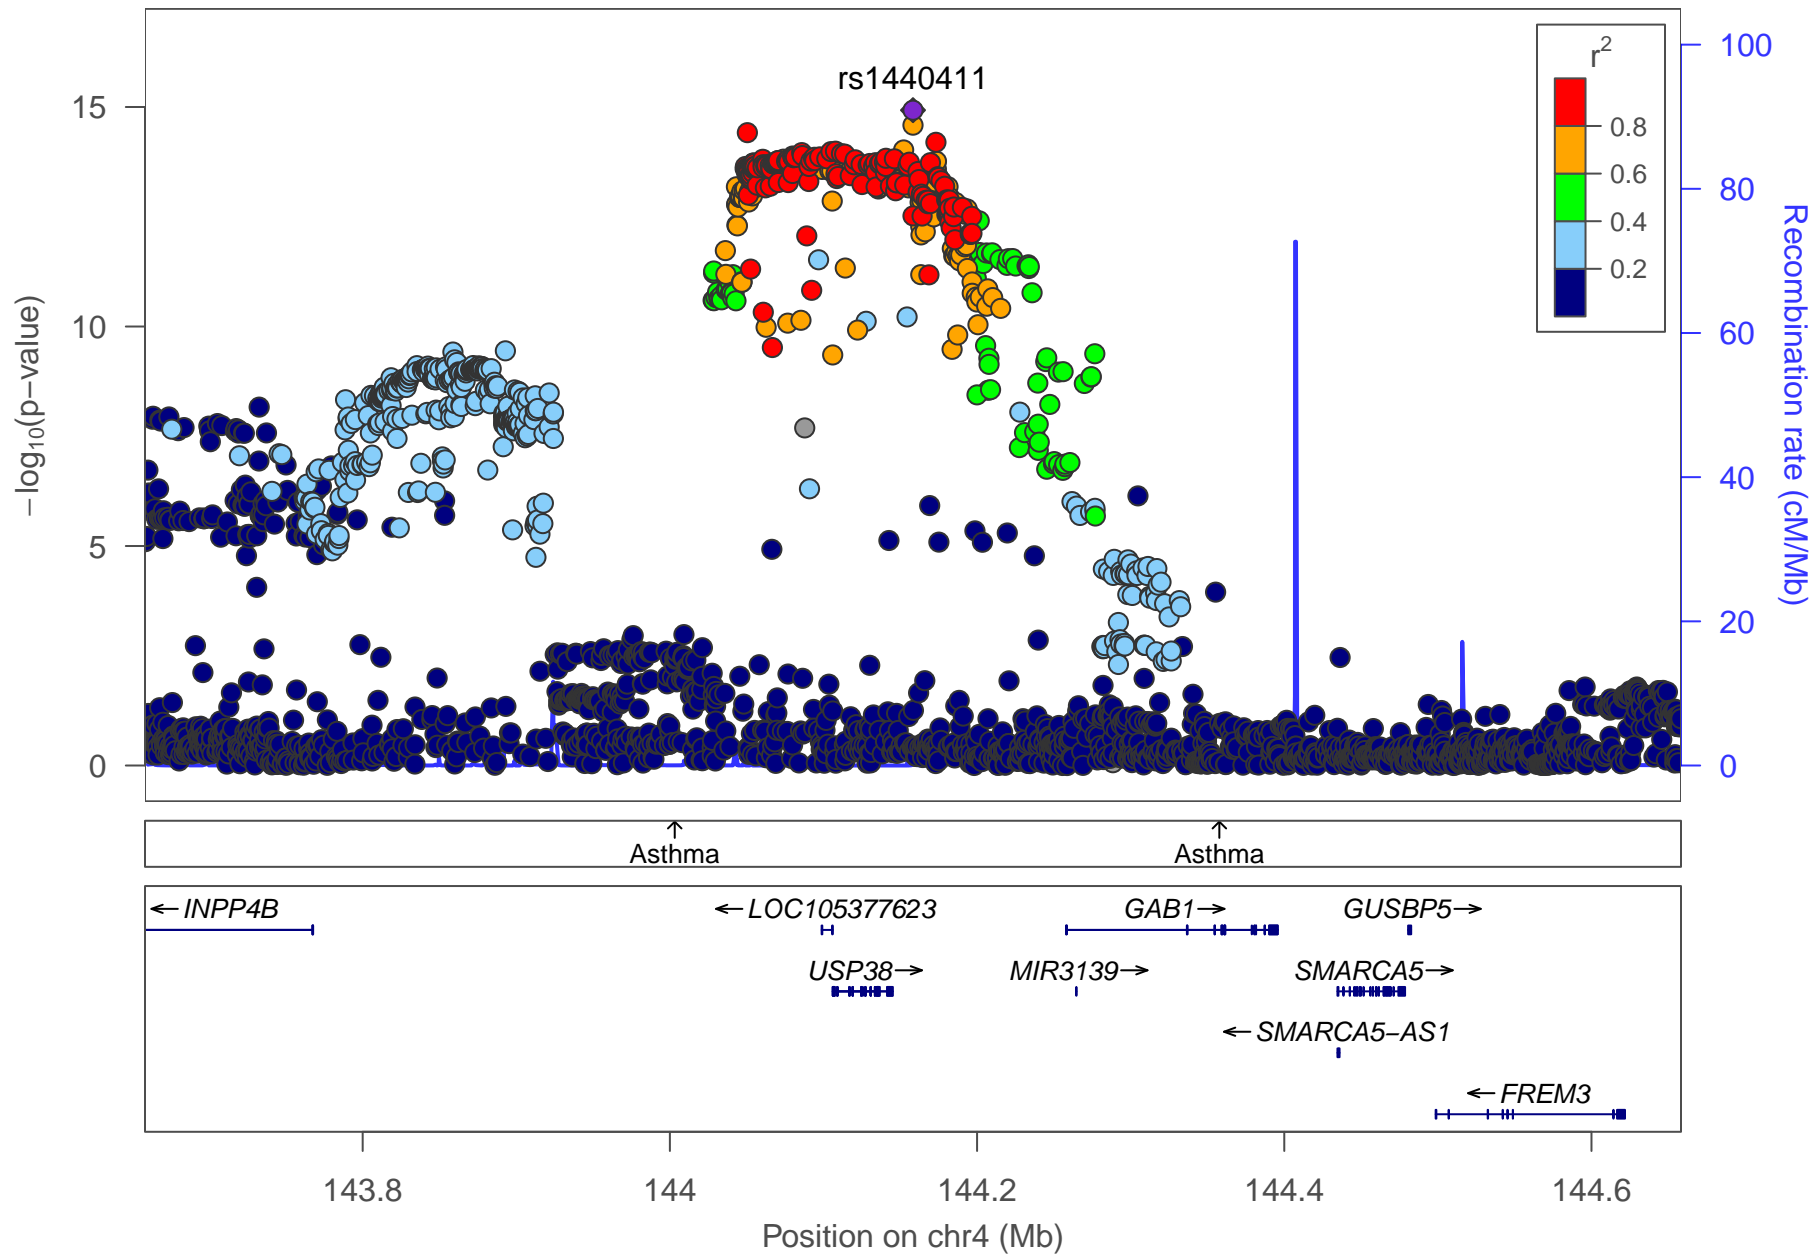

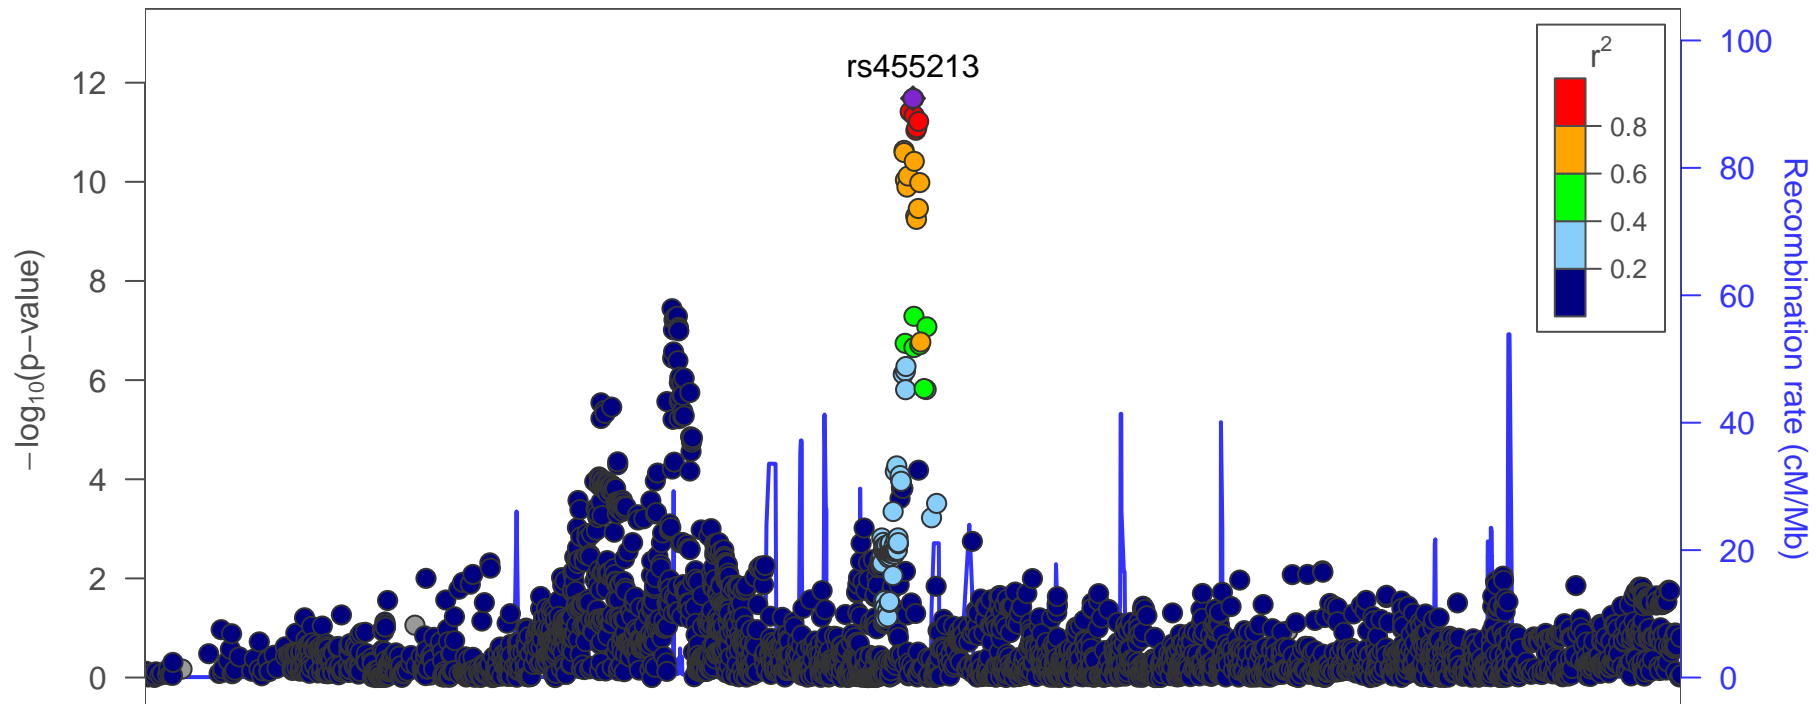

Serum dimethylarginine levels (asymr) 4 GWAS hits omitted  
 Serum dimethylarginine levels (asymmetric/s)  
 Serum dimethylarginine levels (symm)

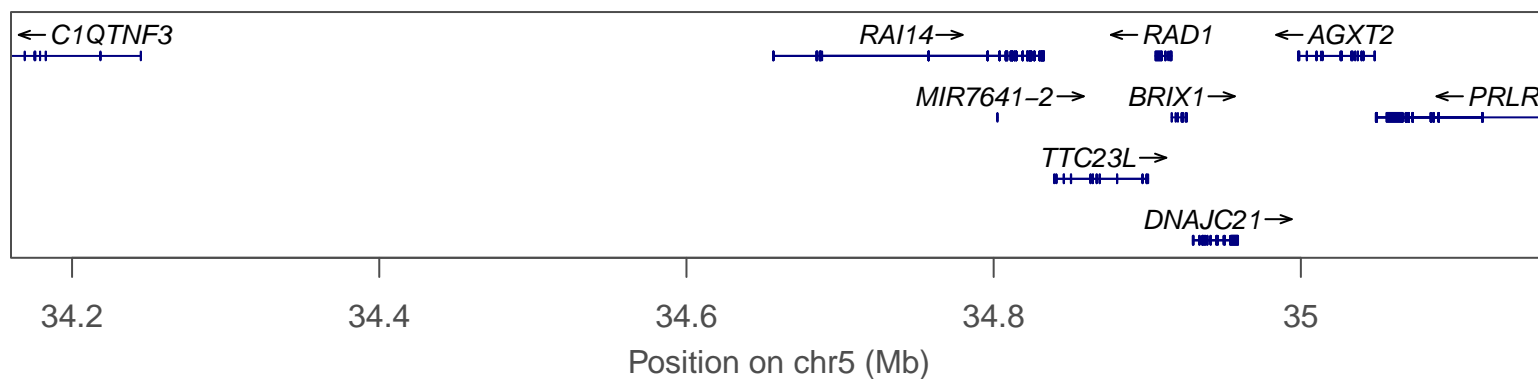



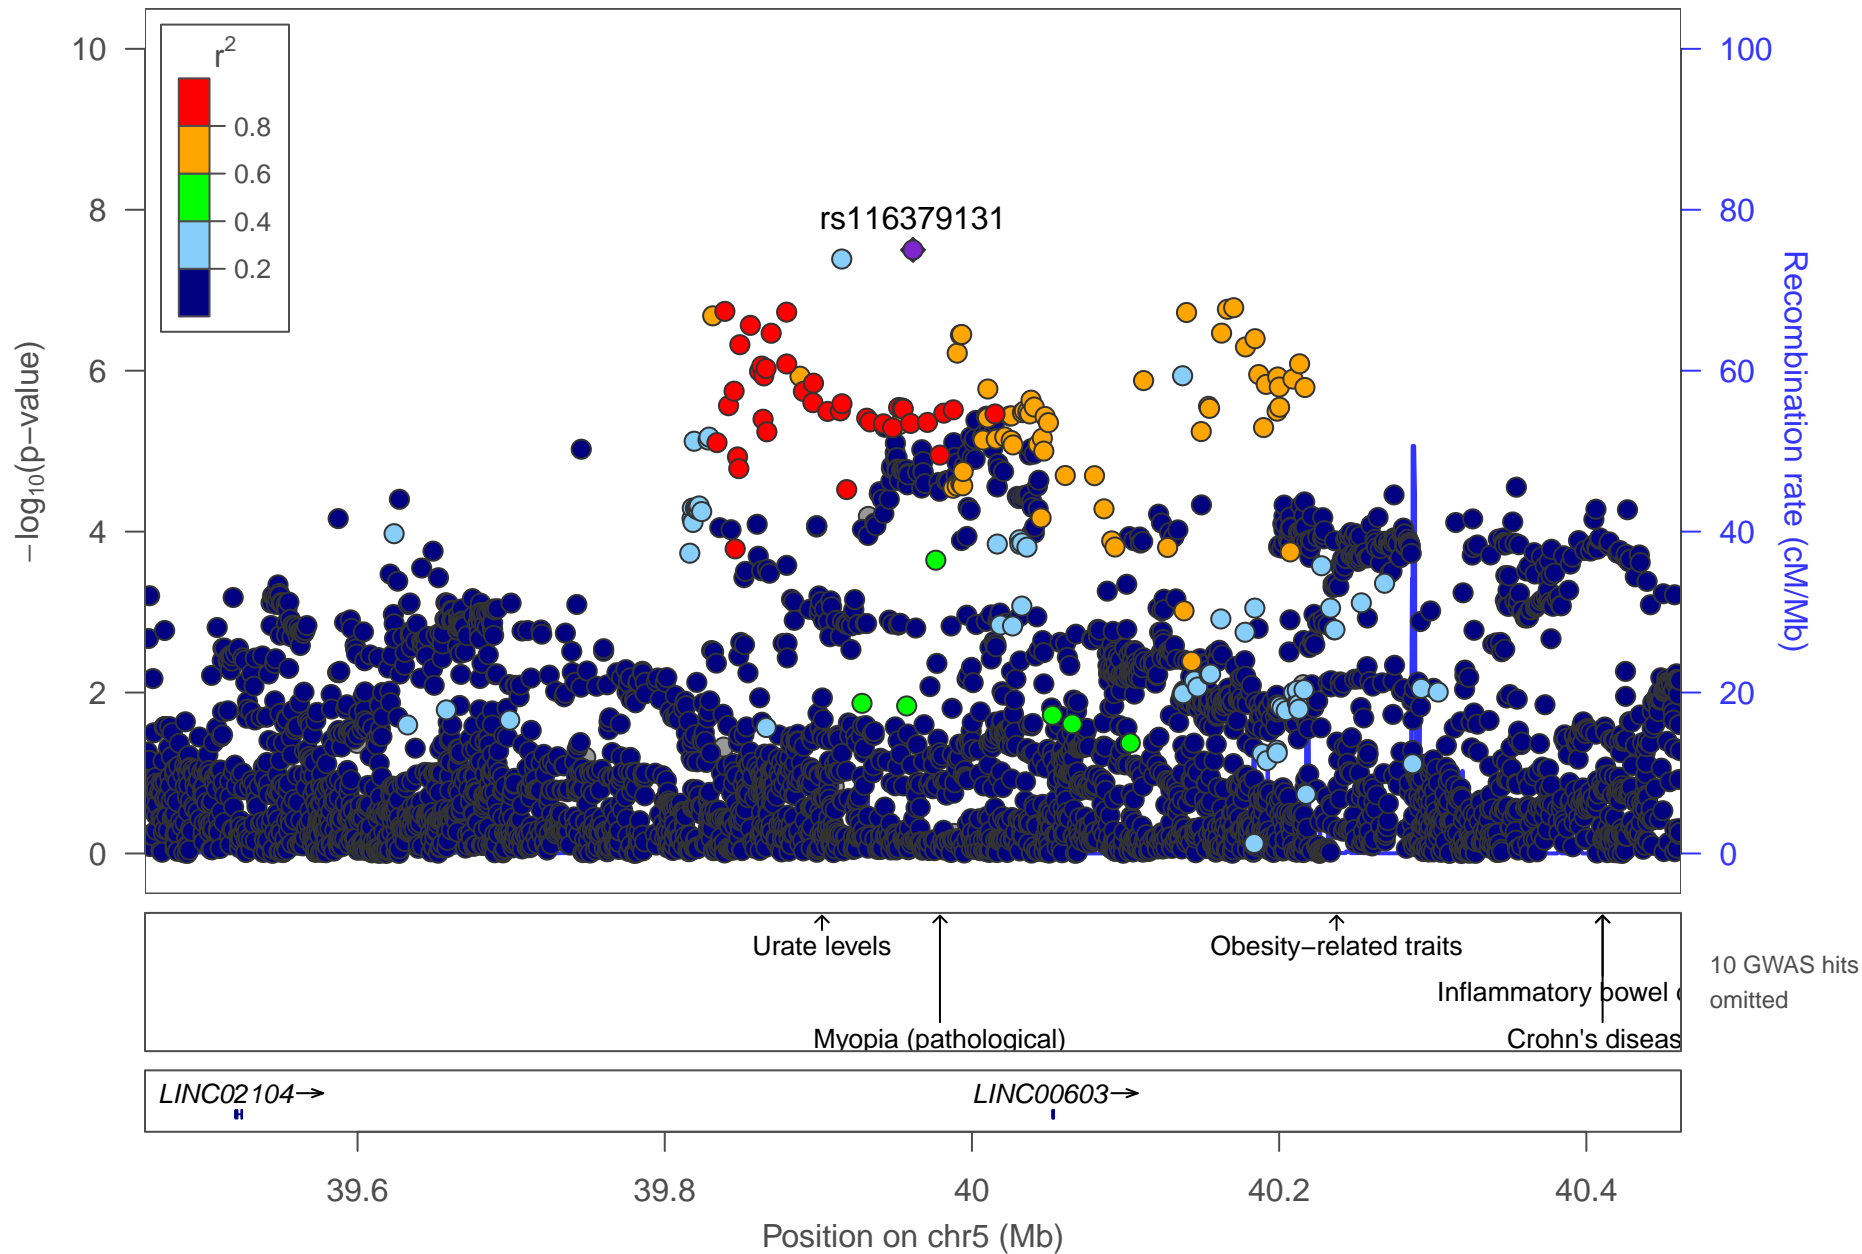

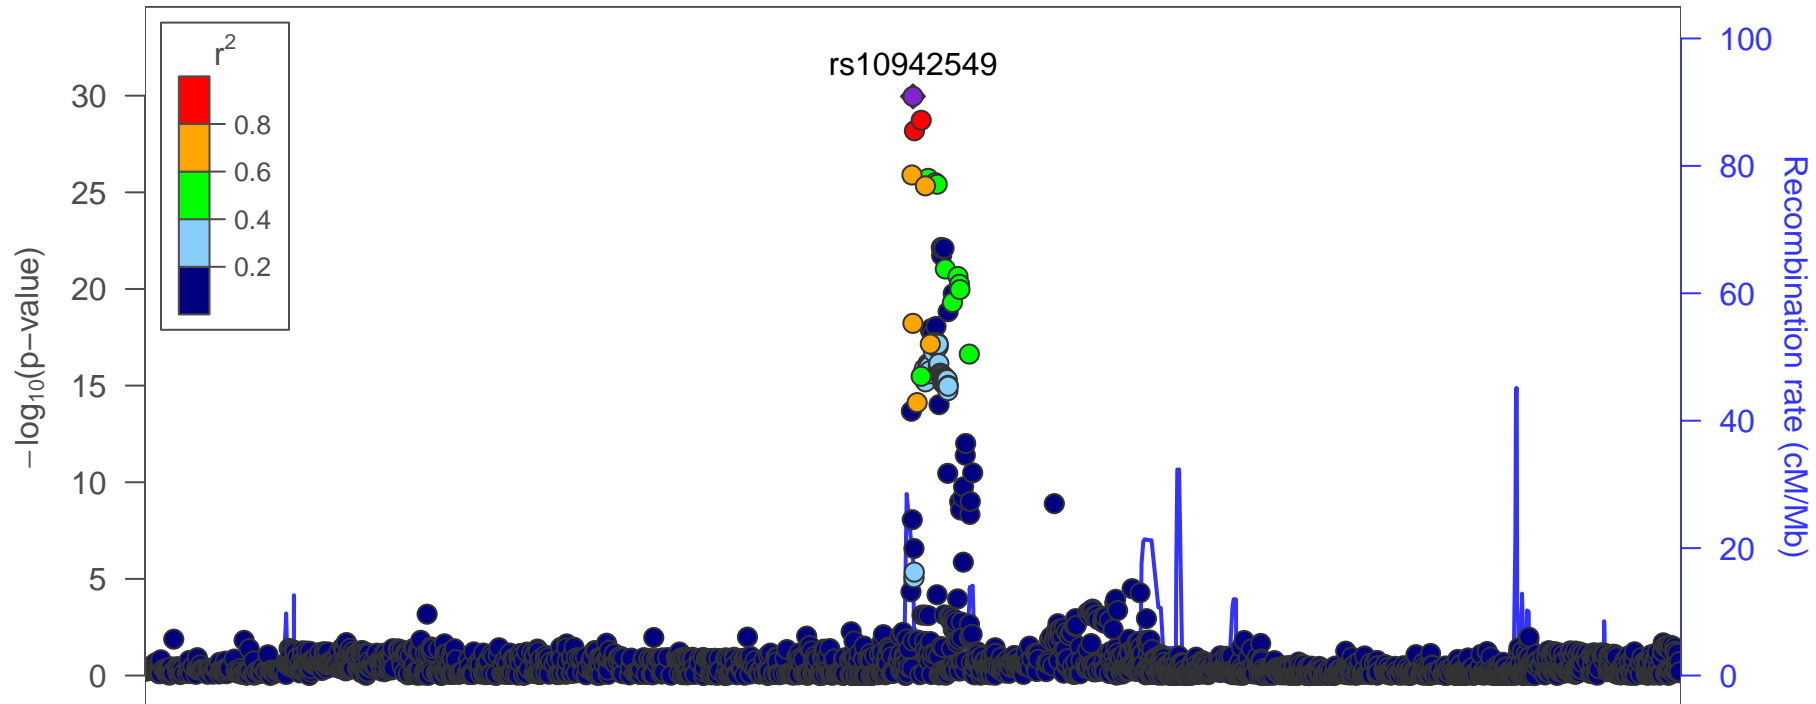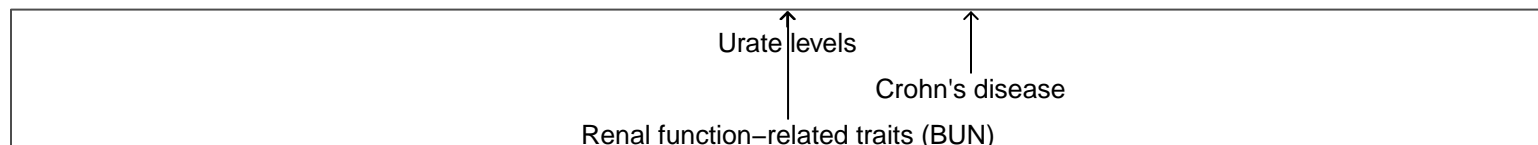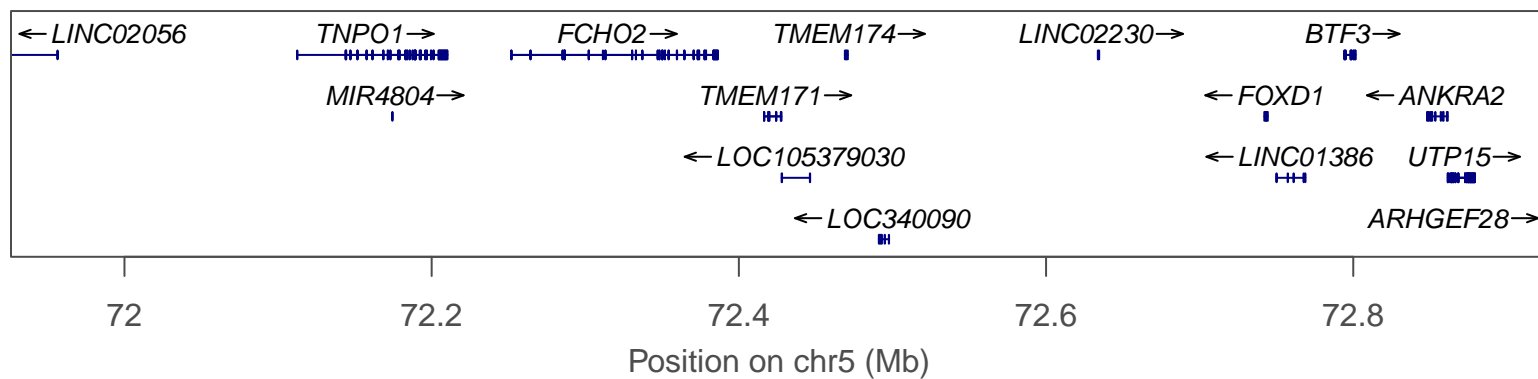

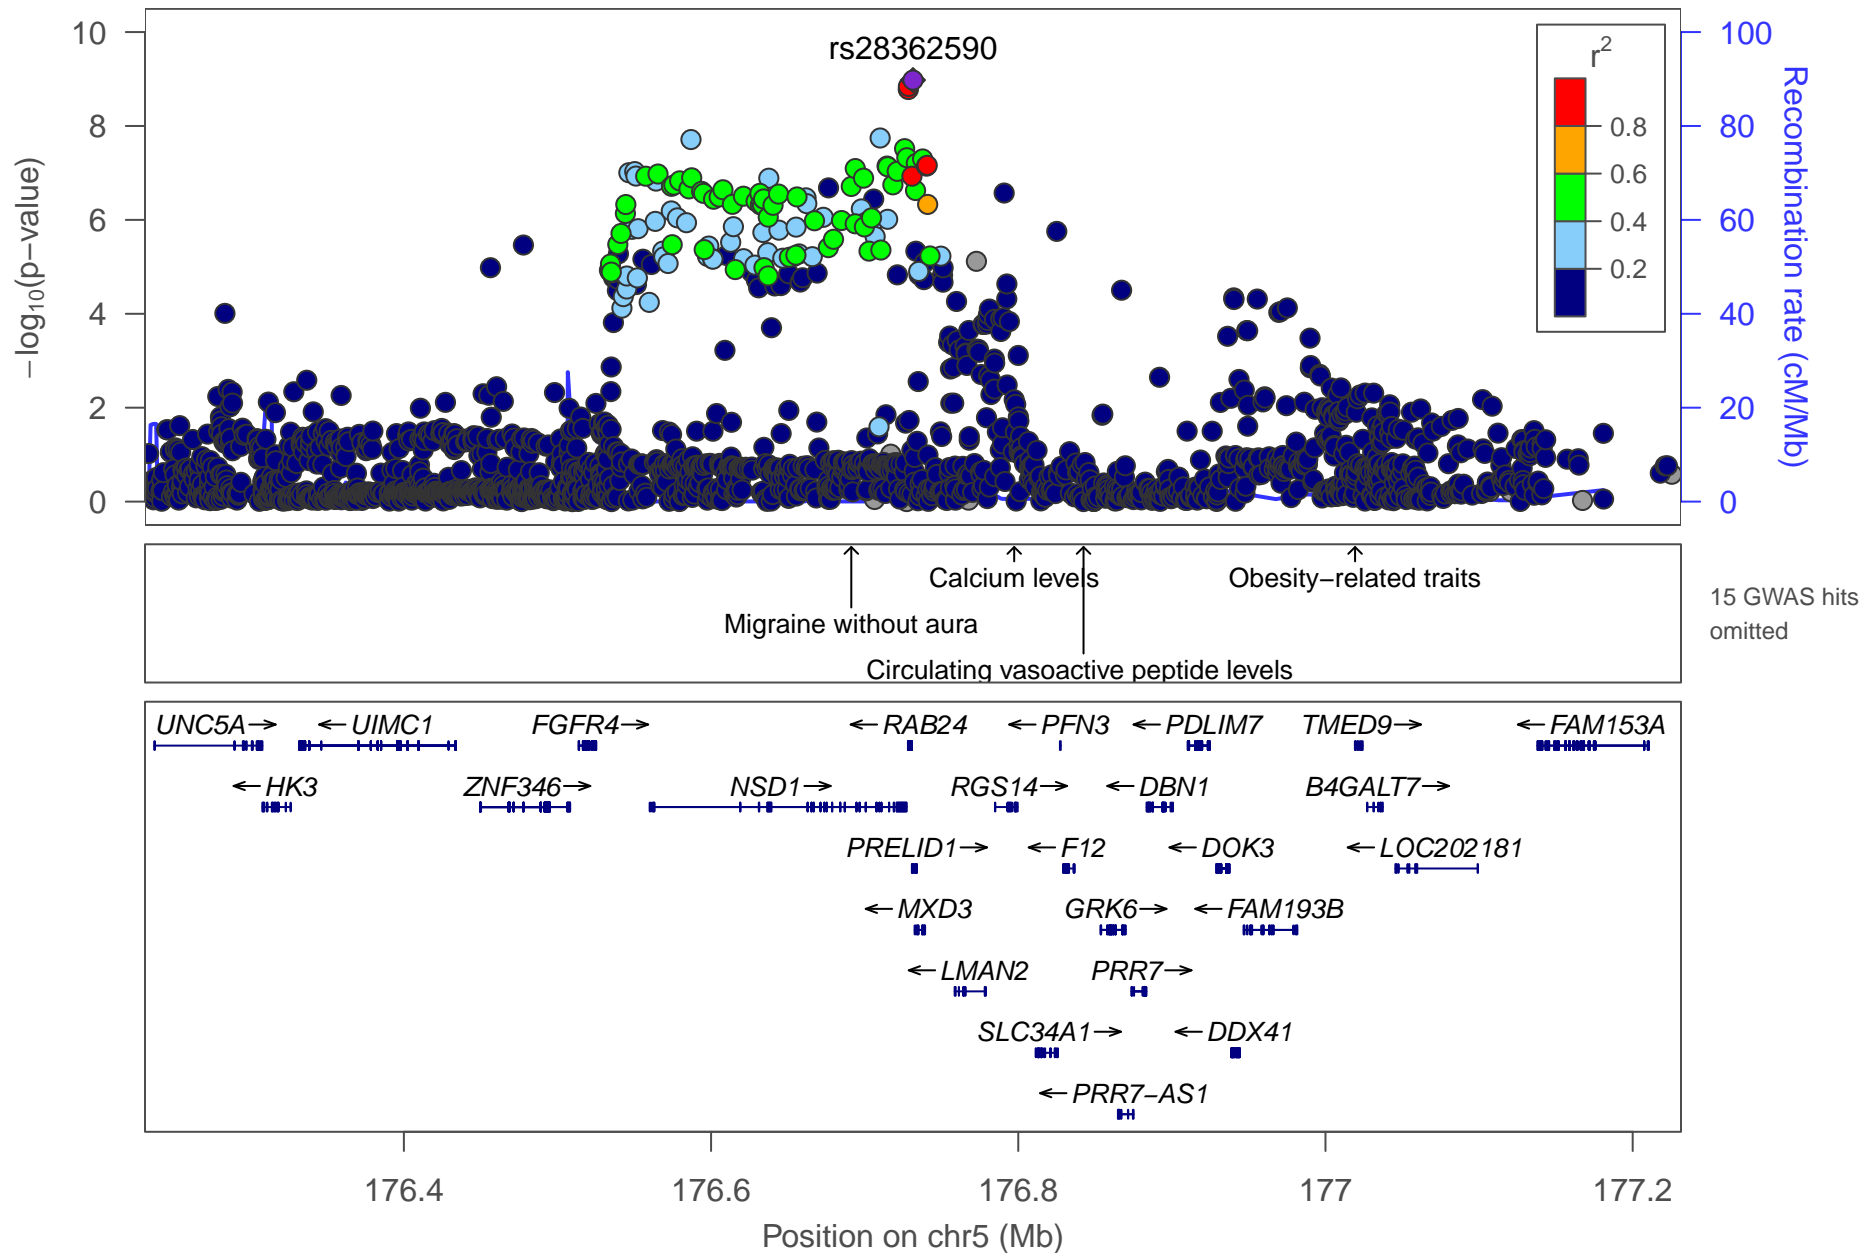

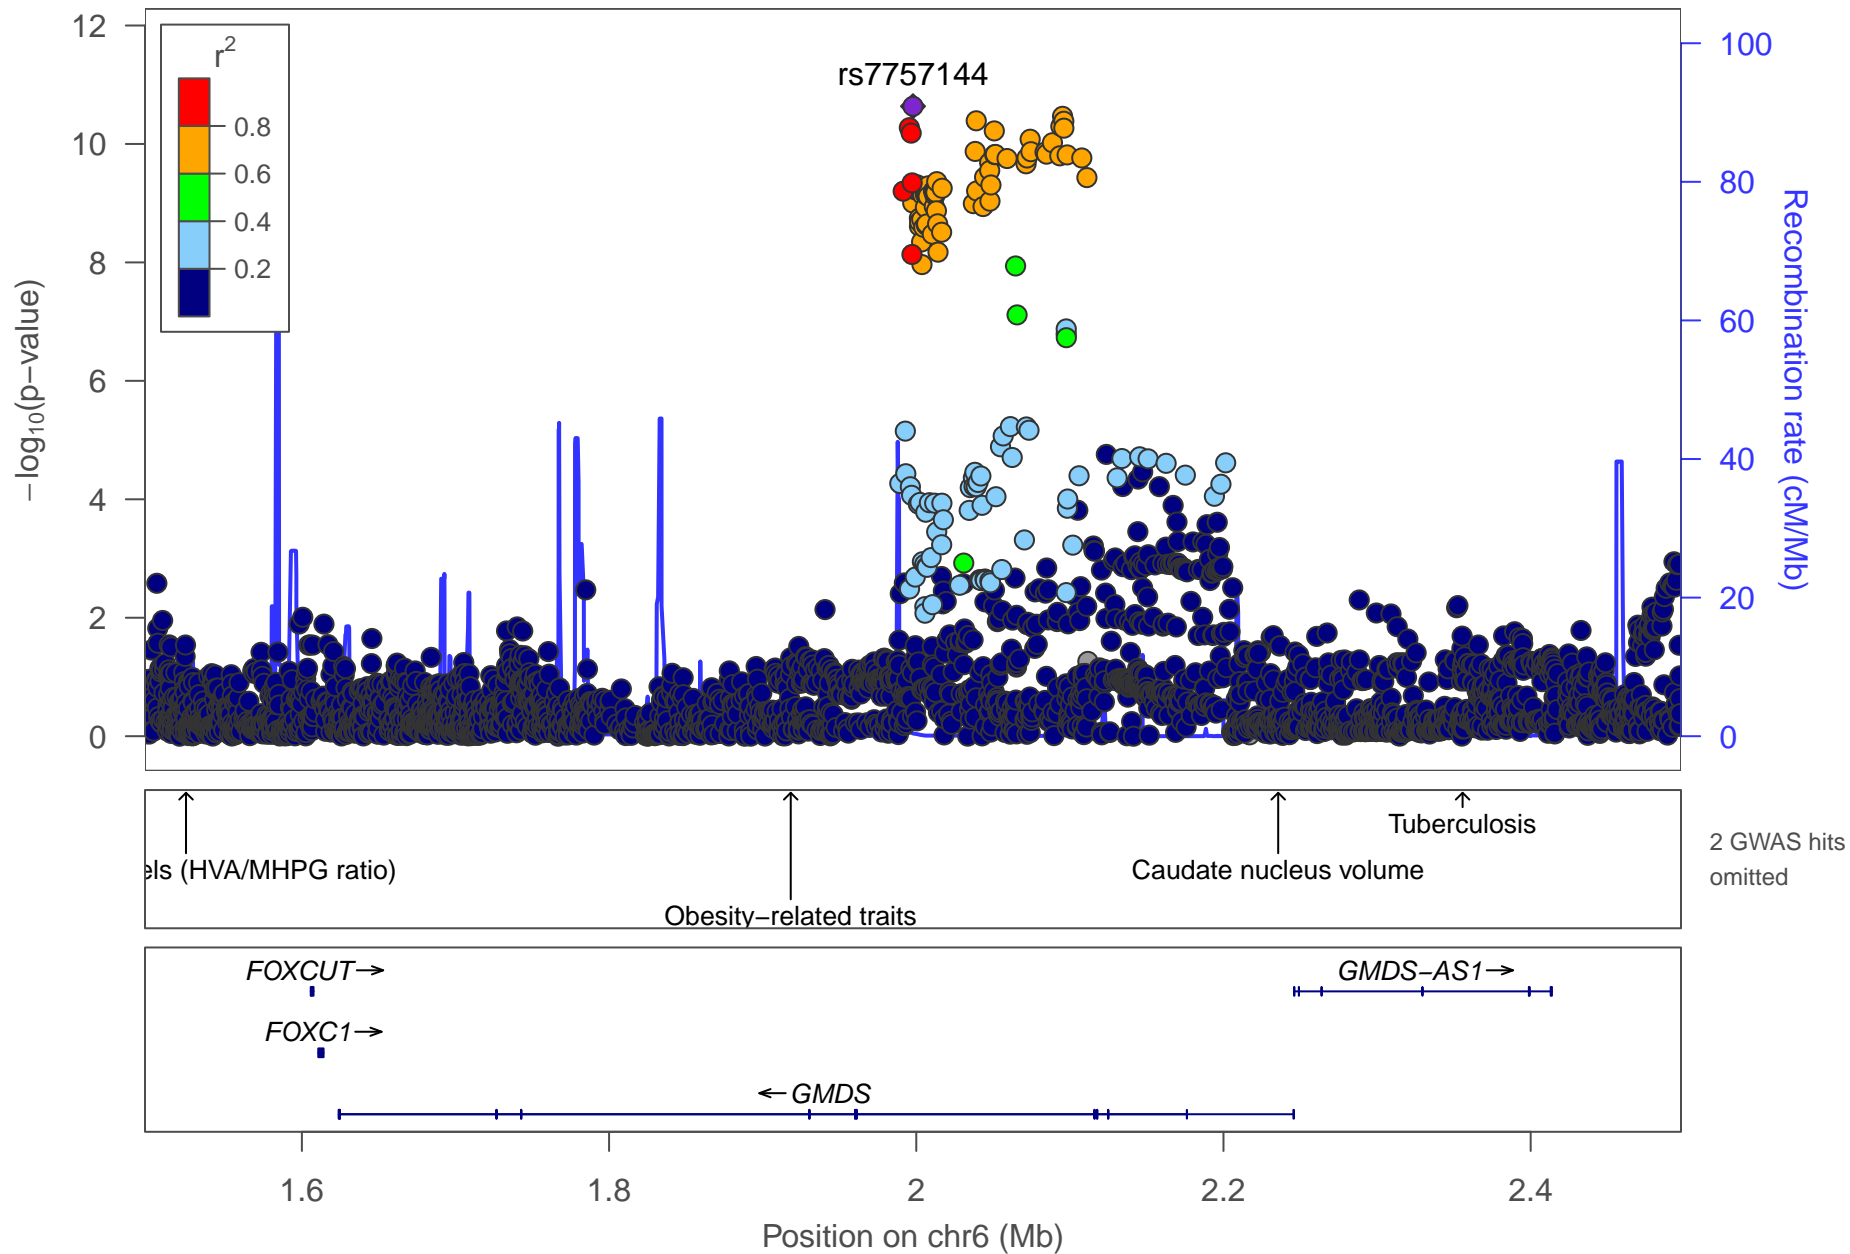

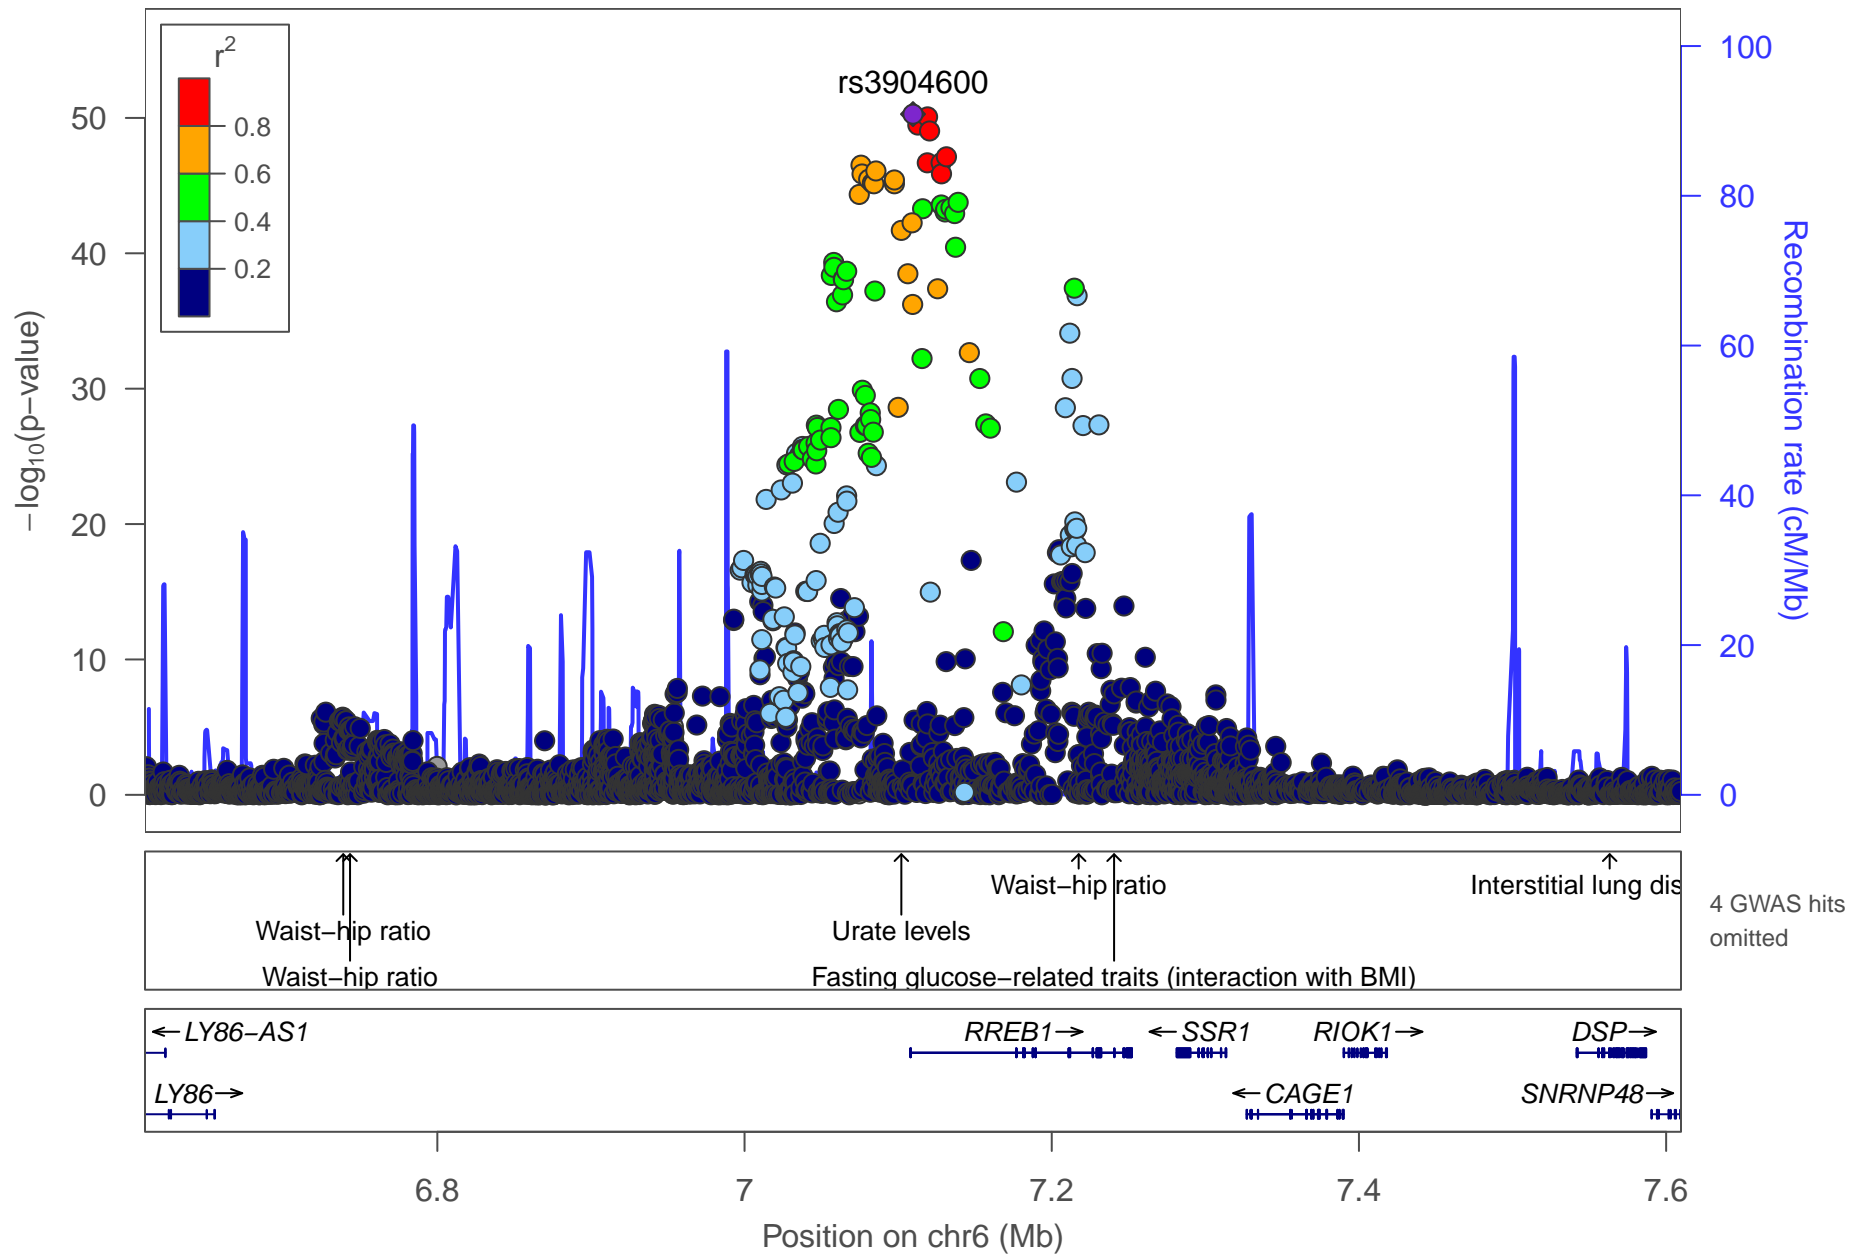

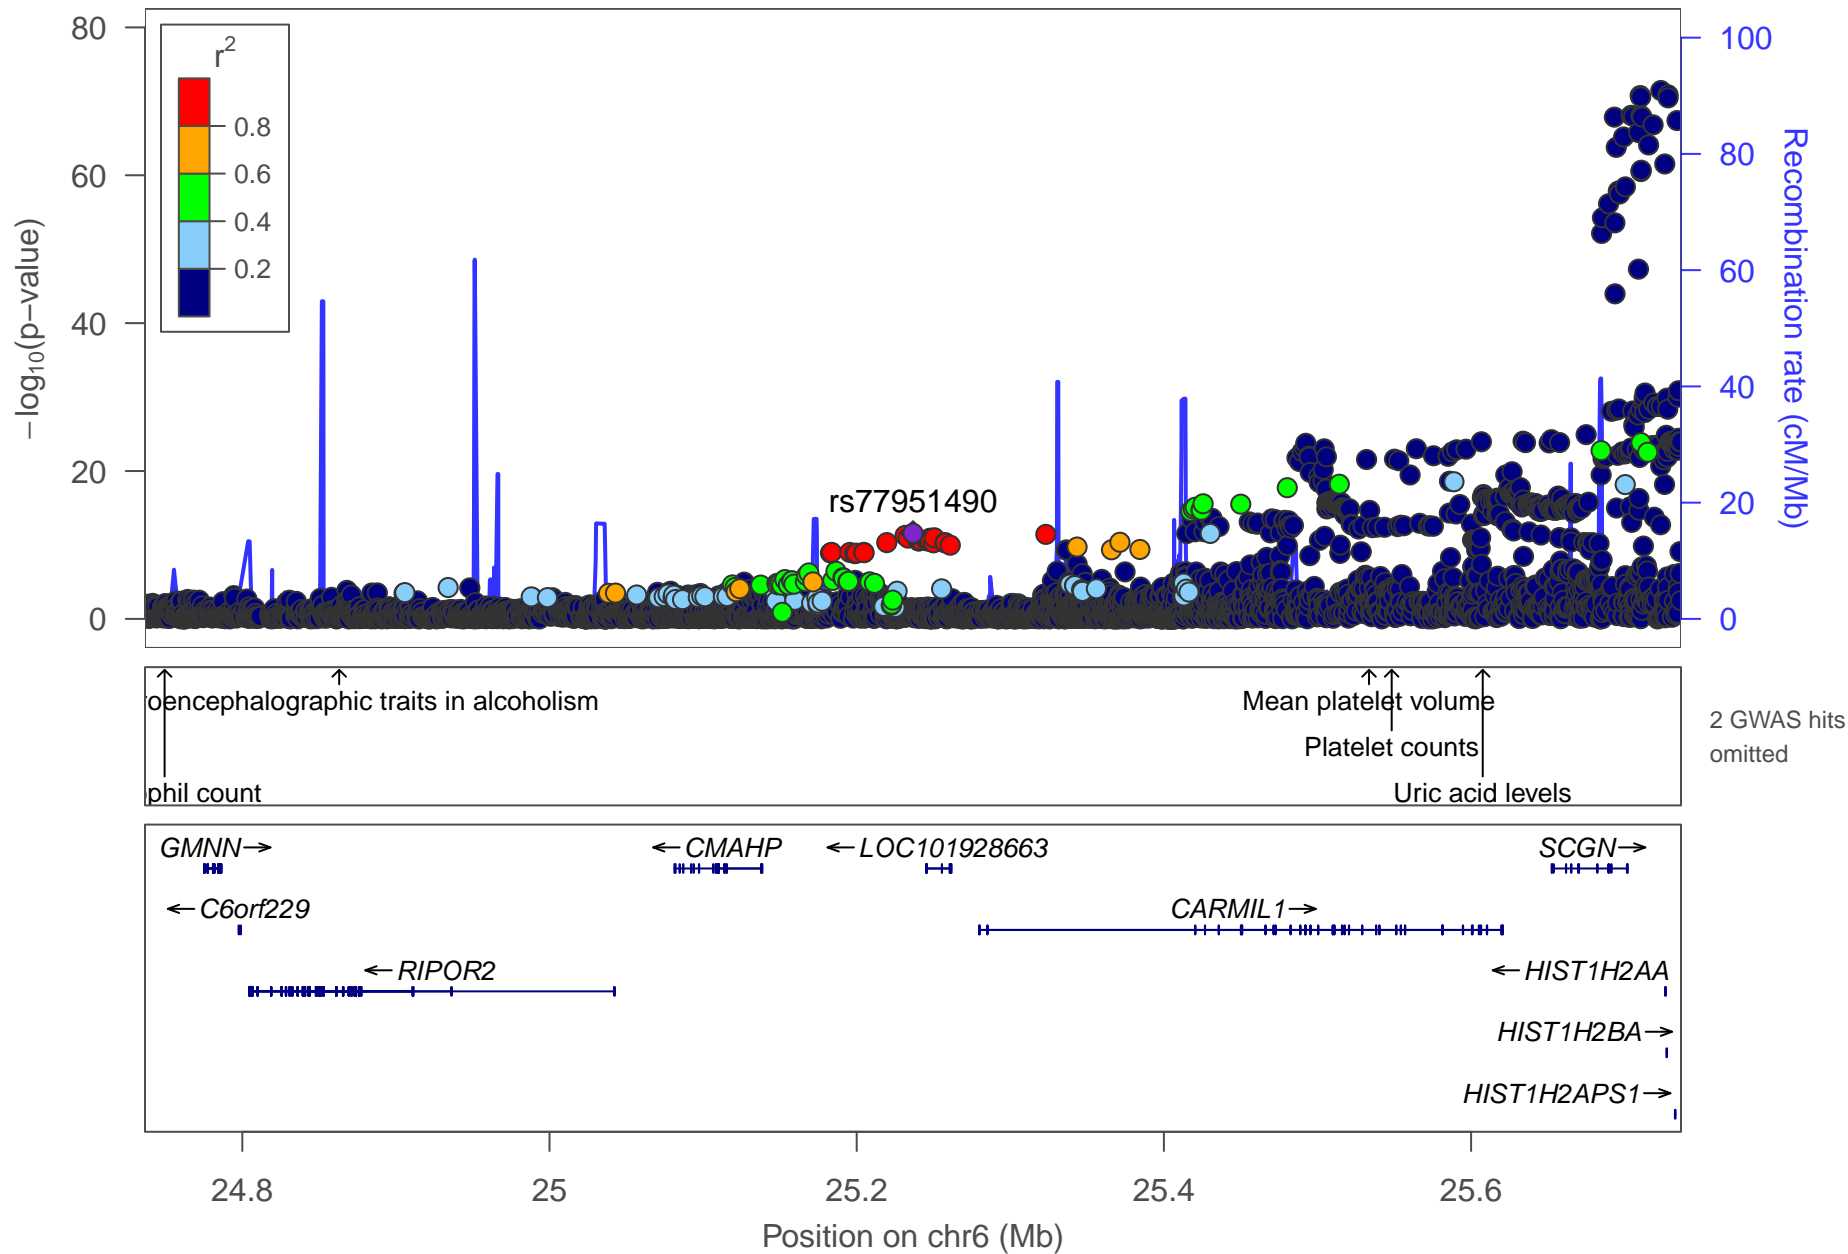

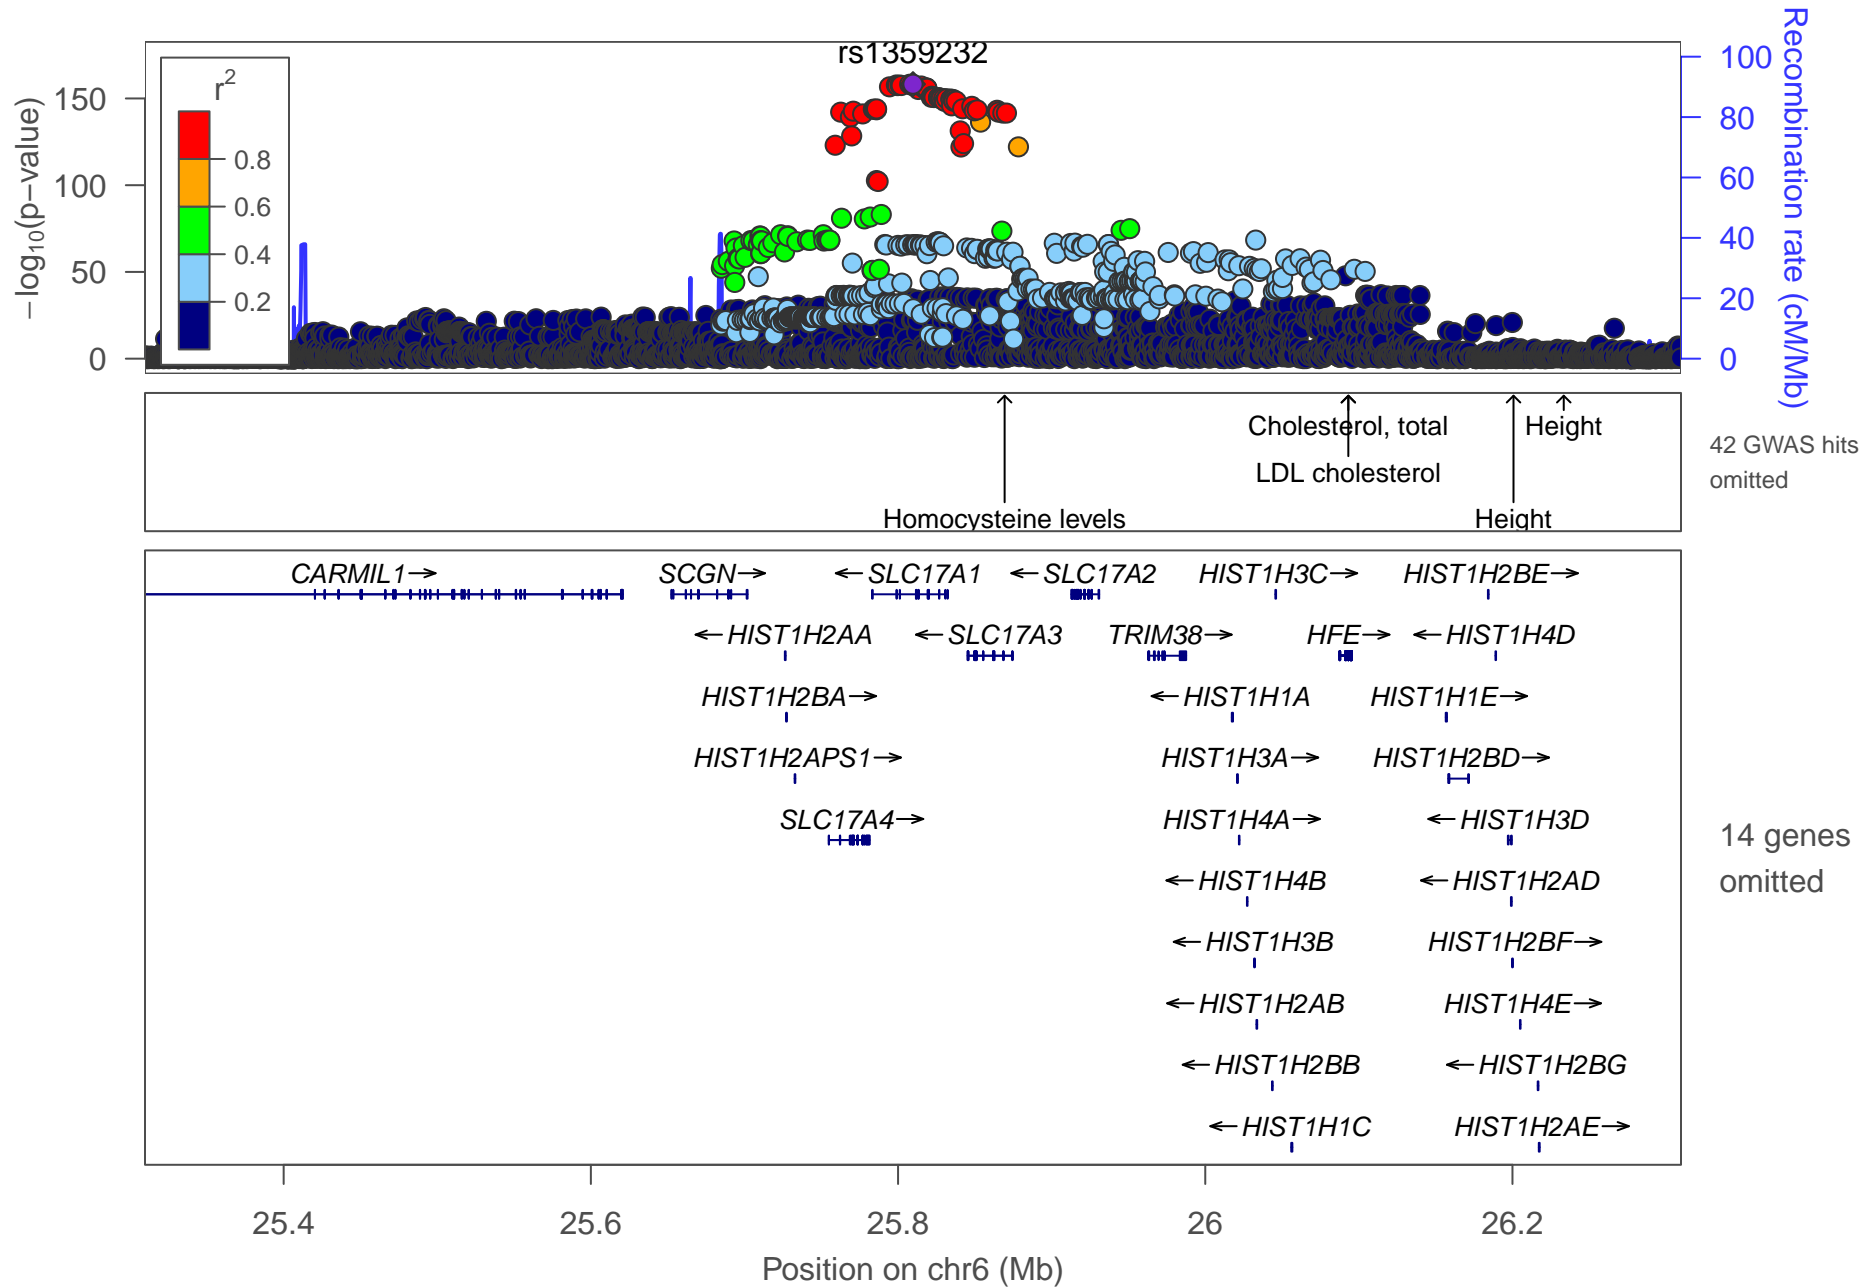

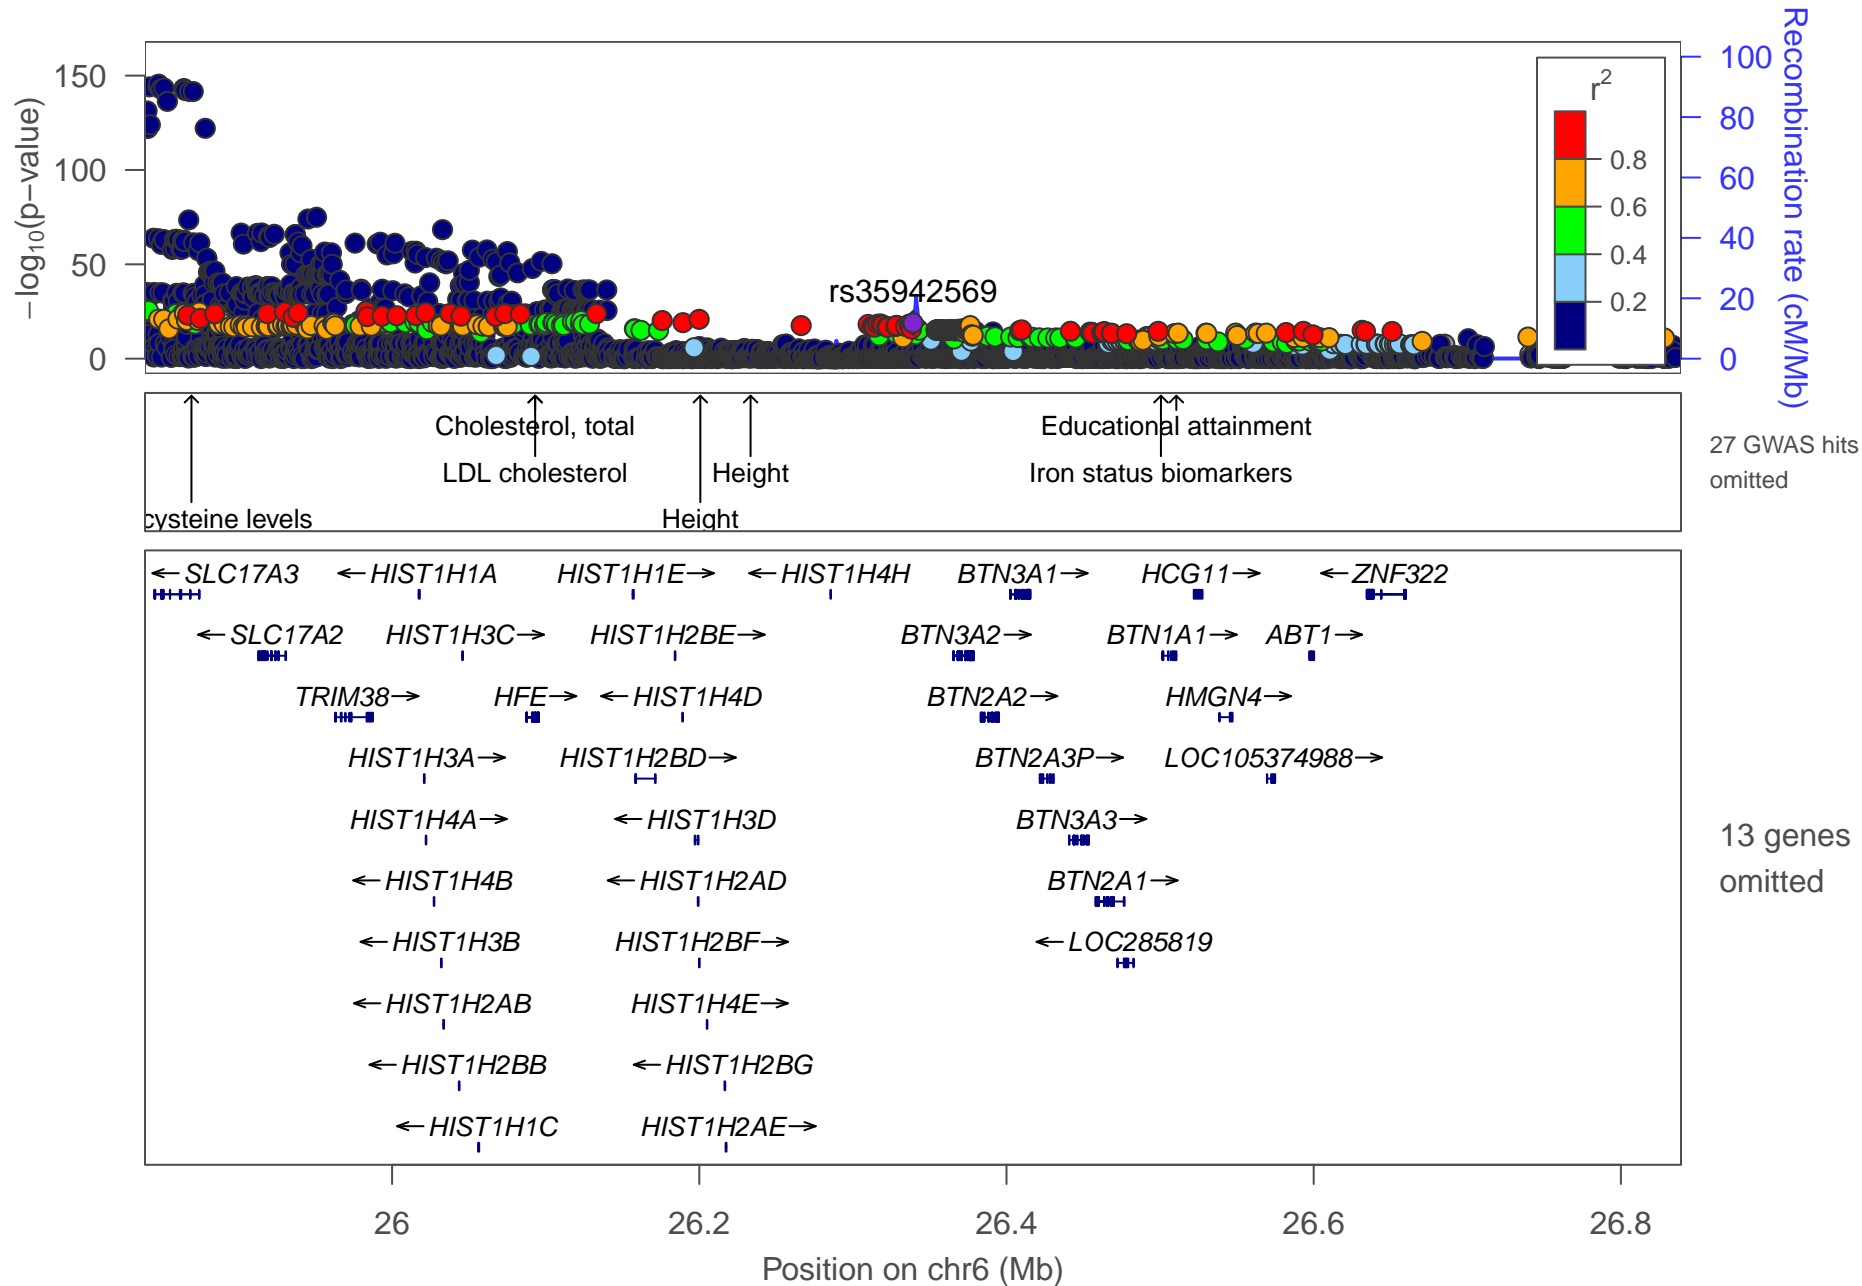



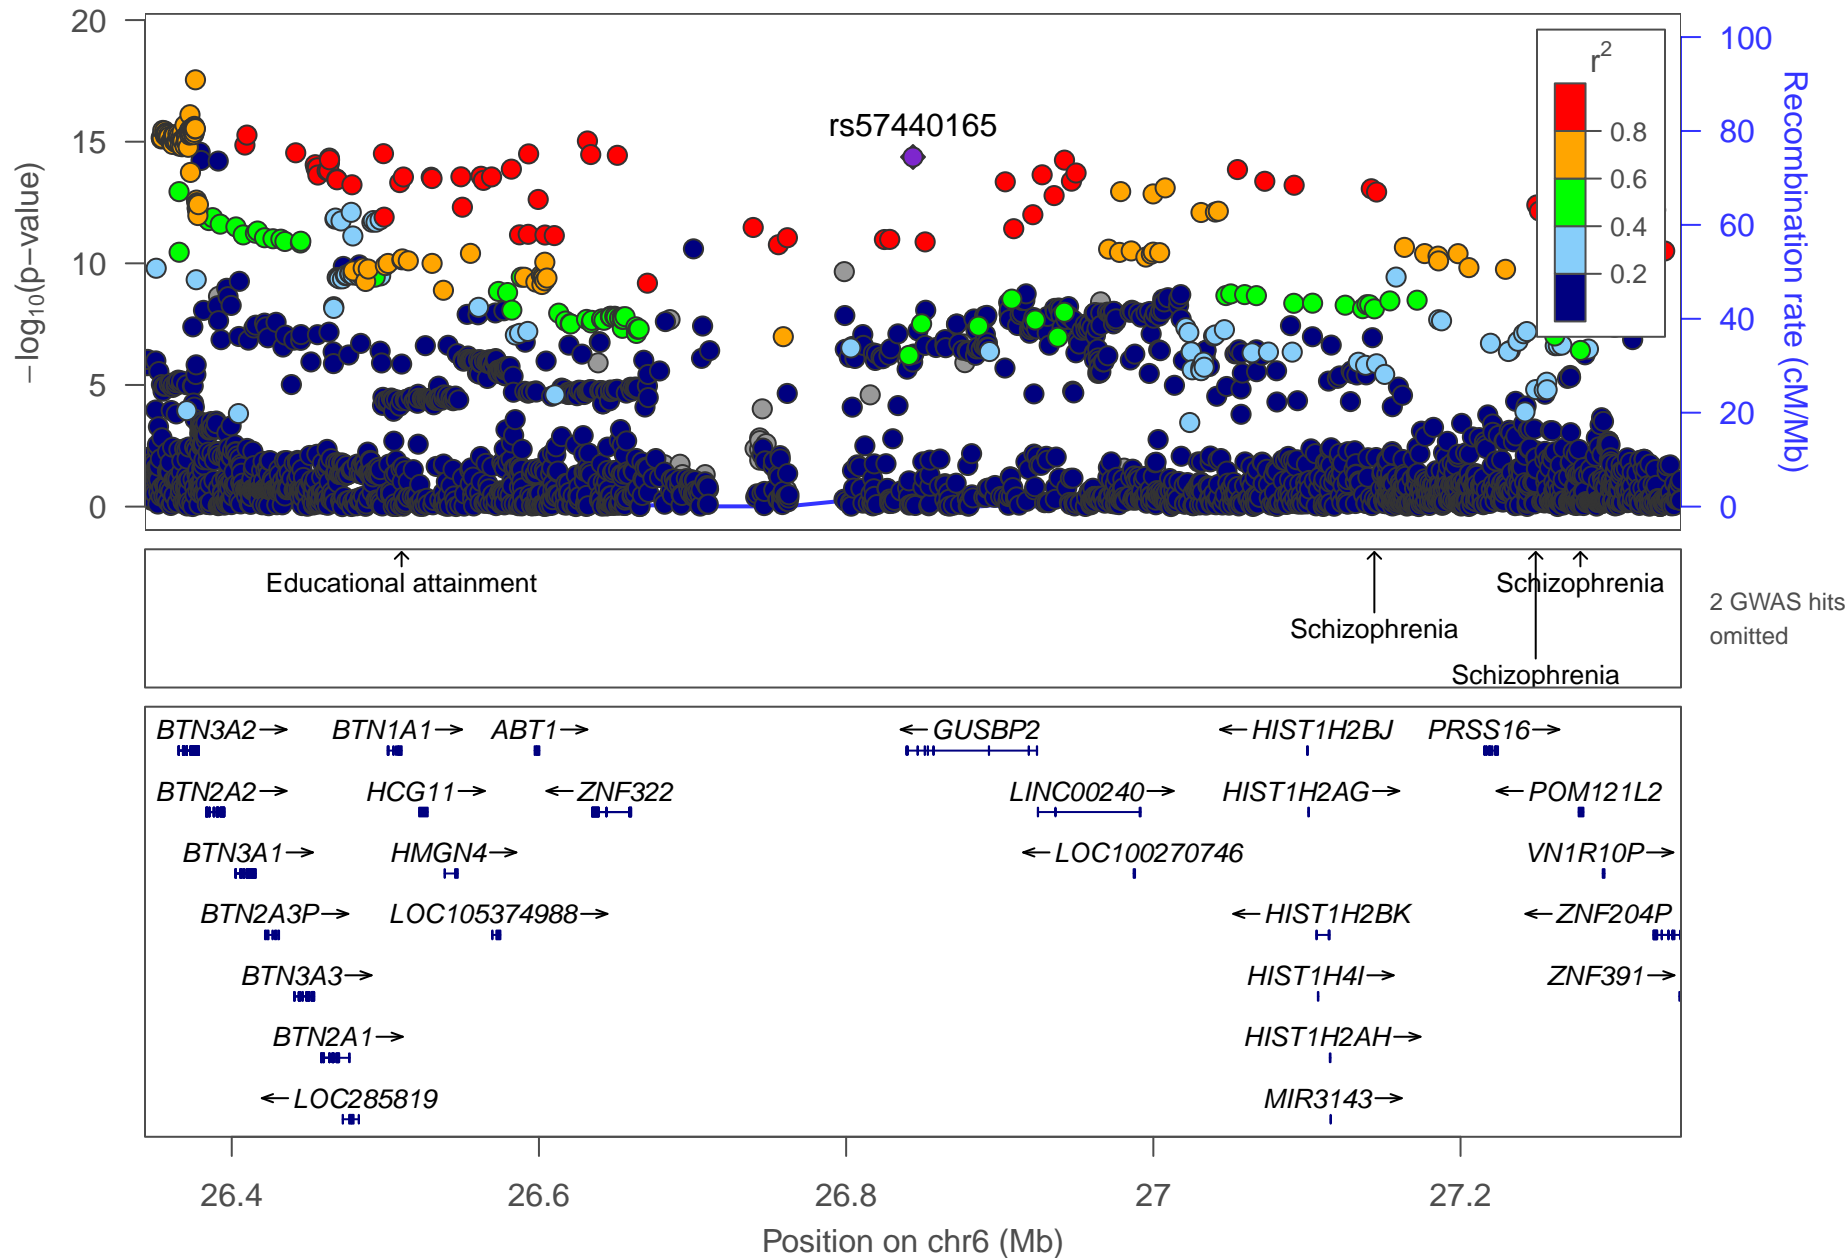

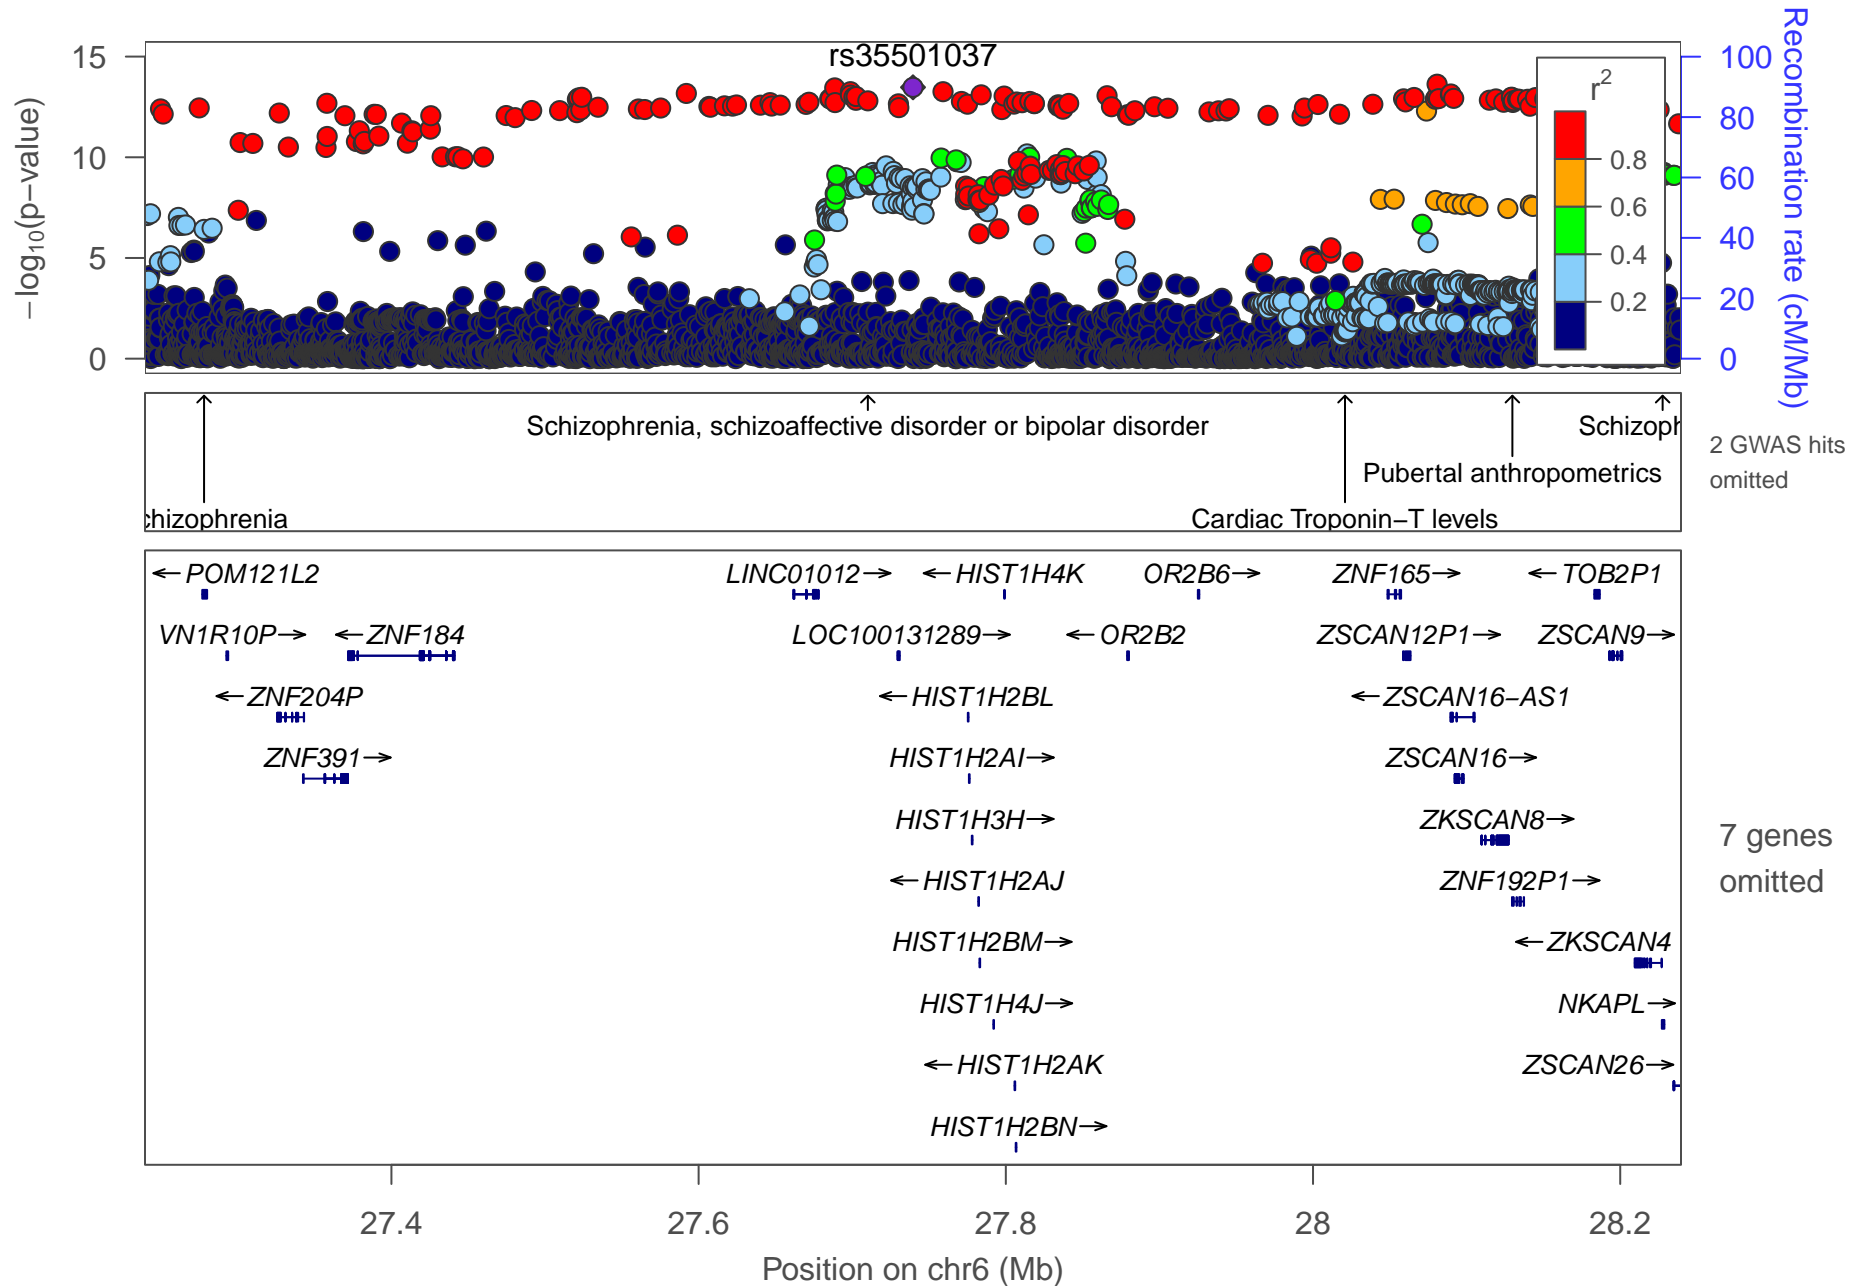

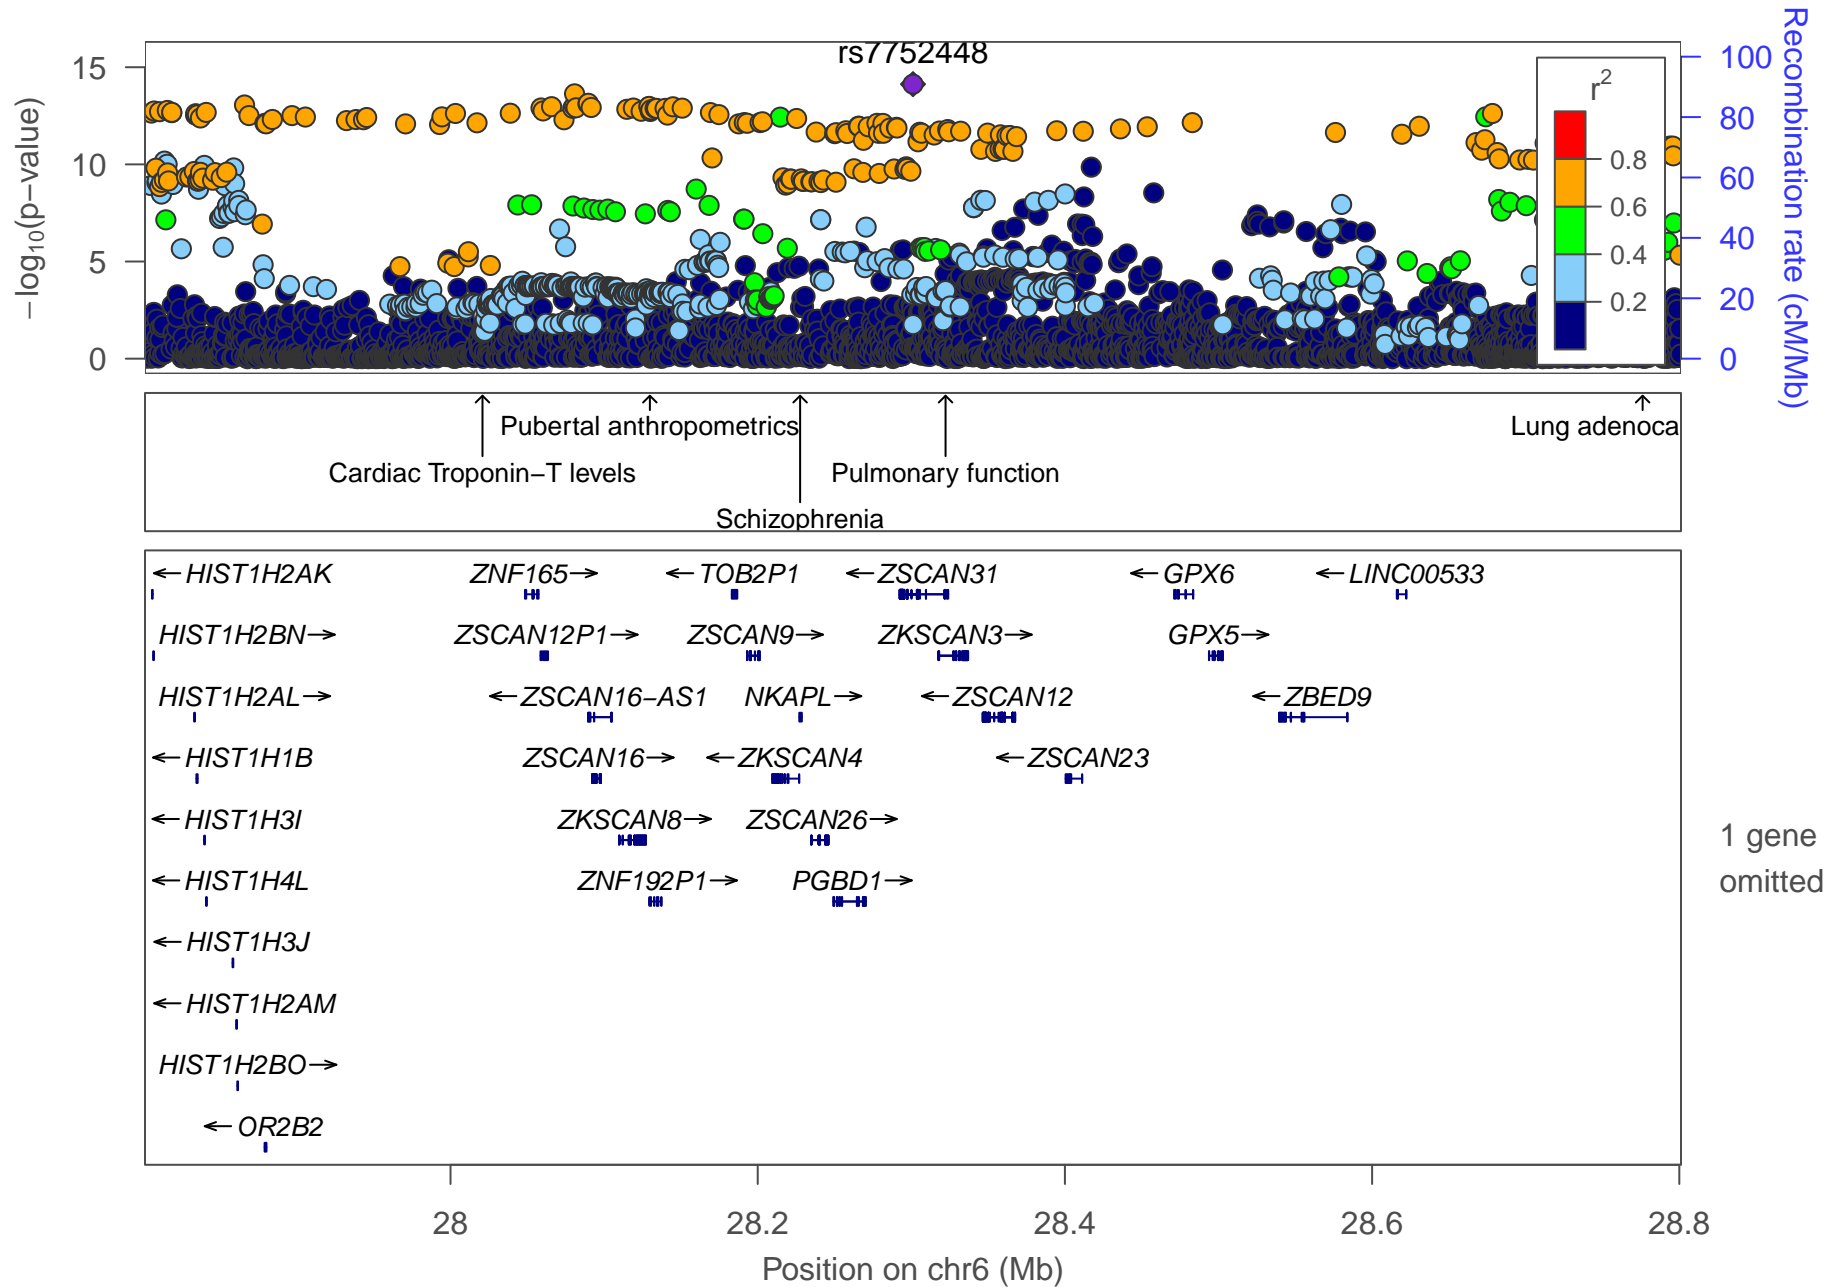

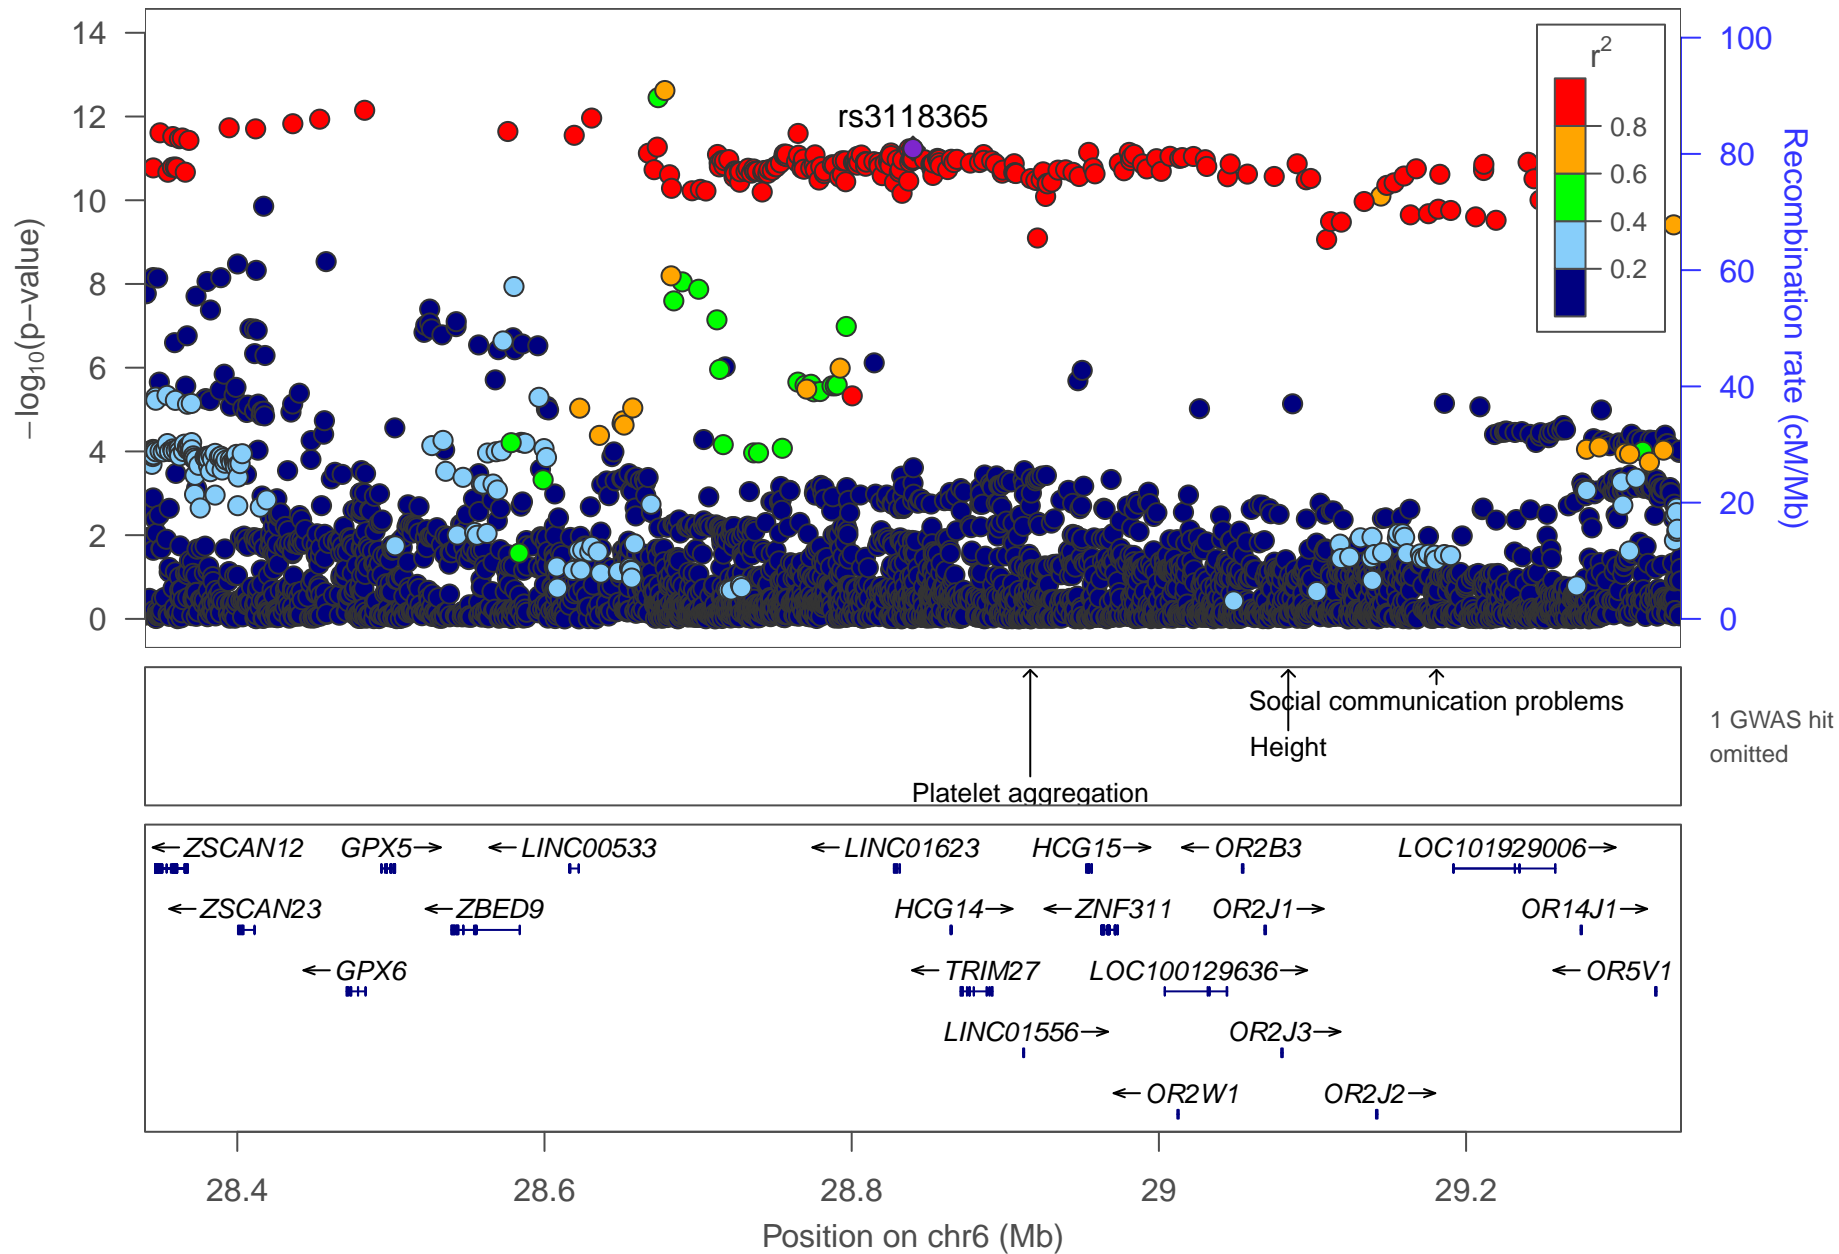

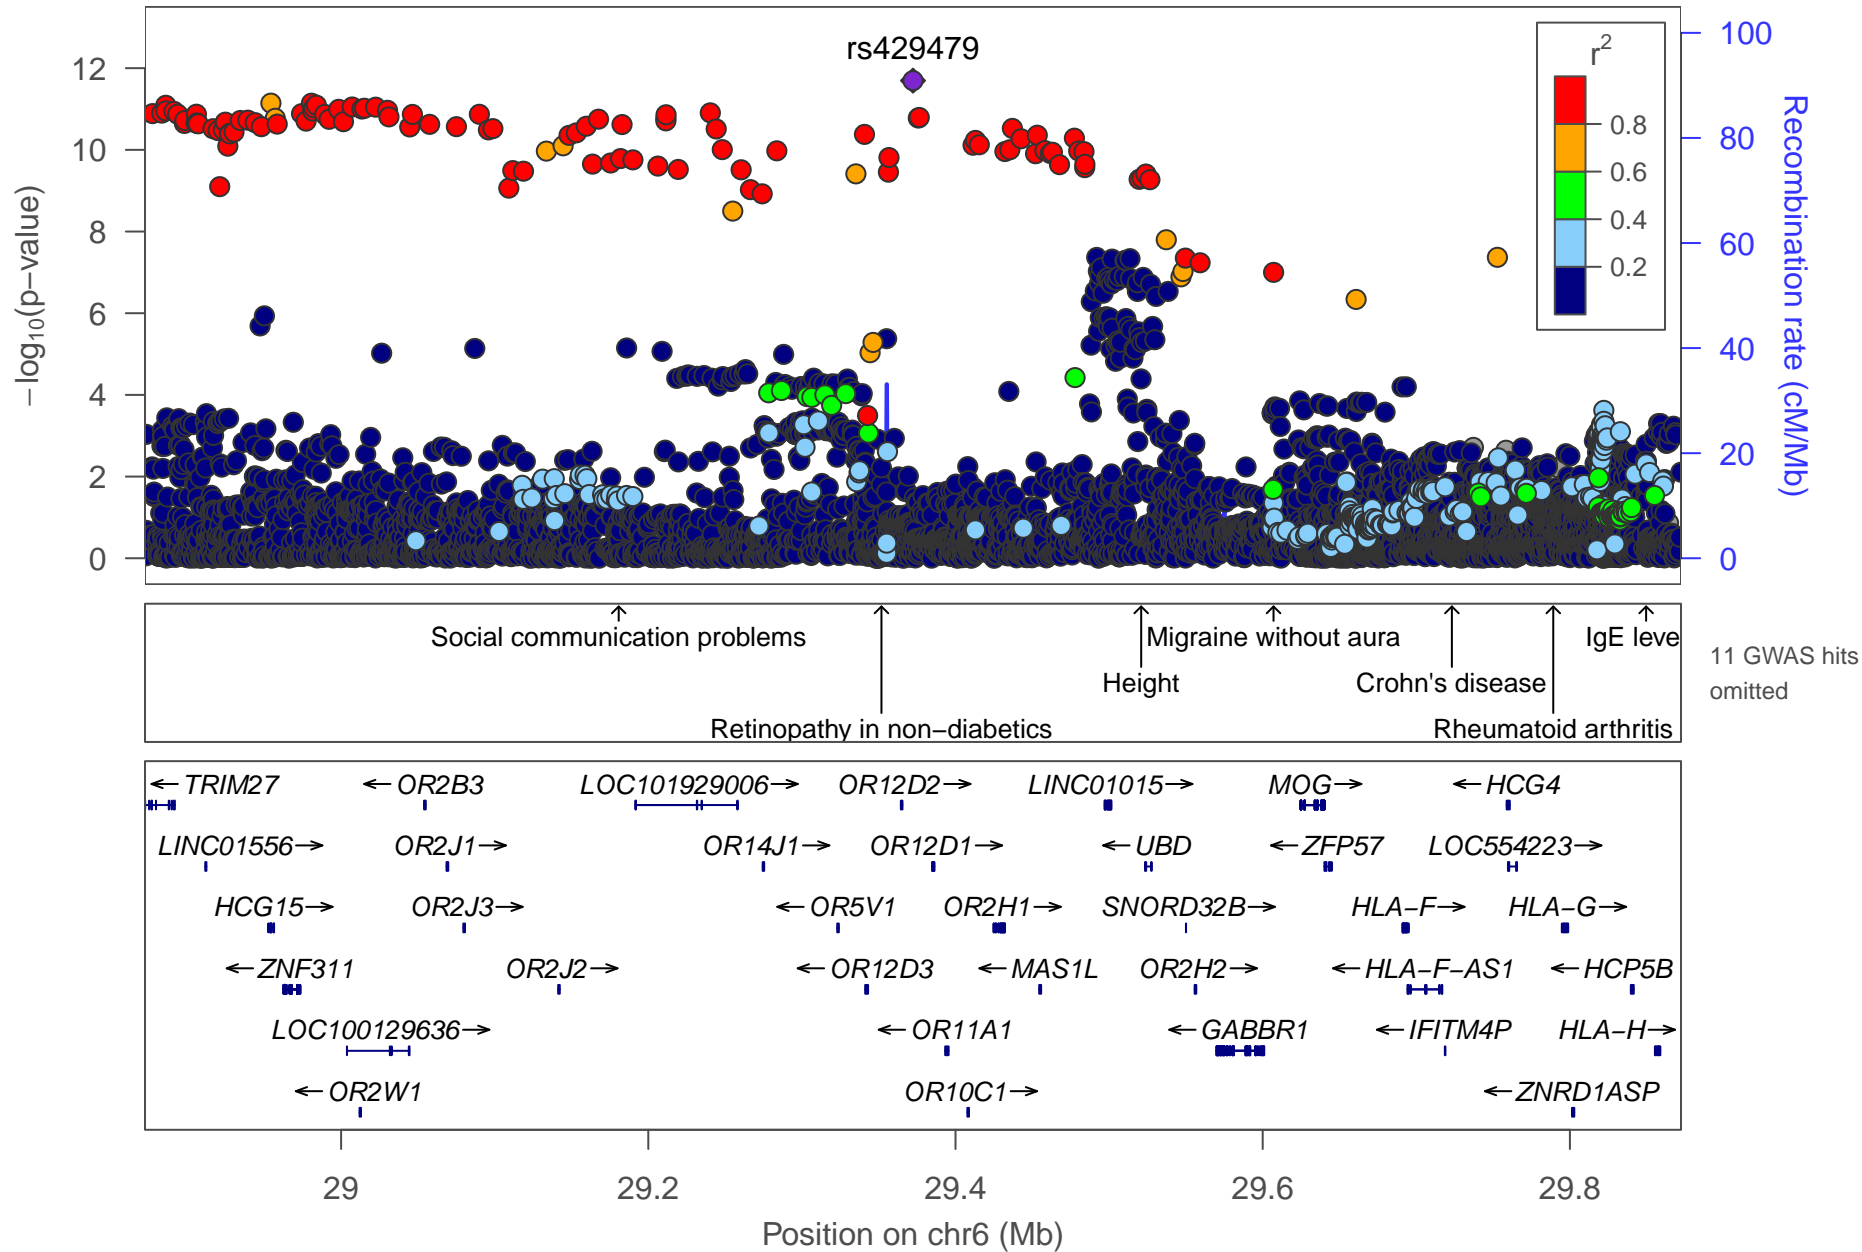

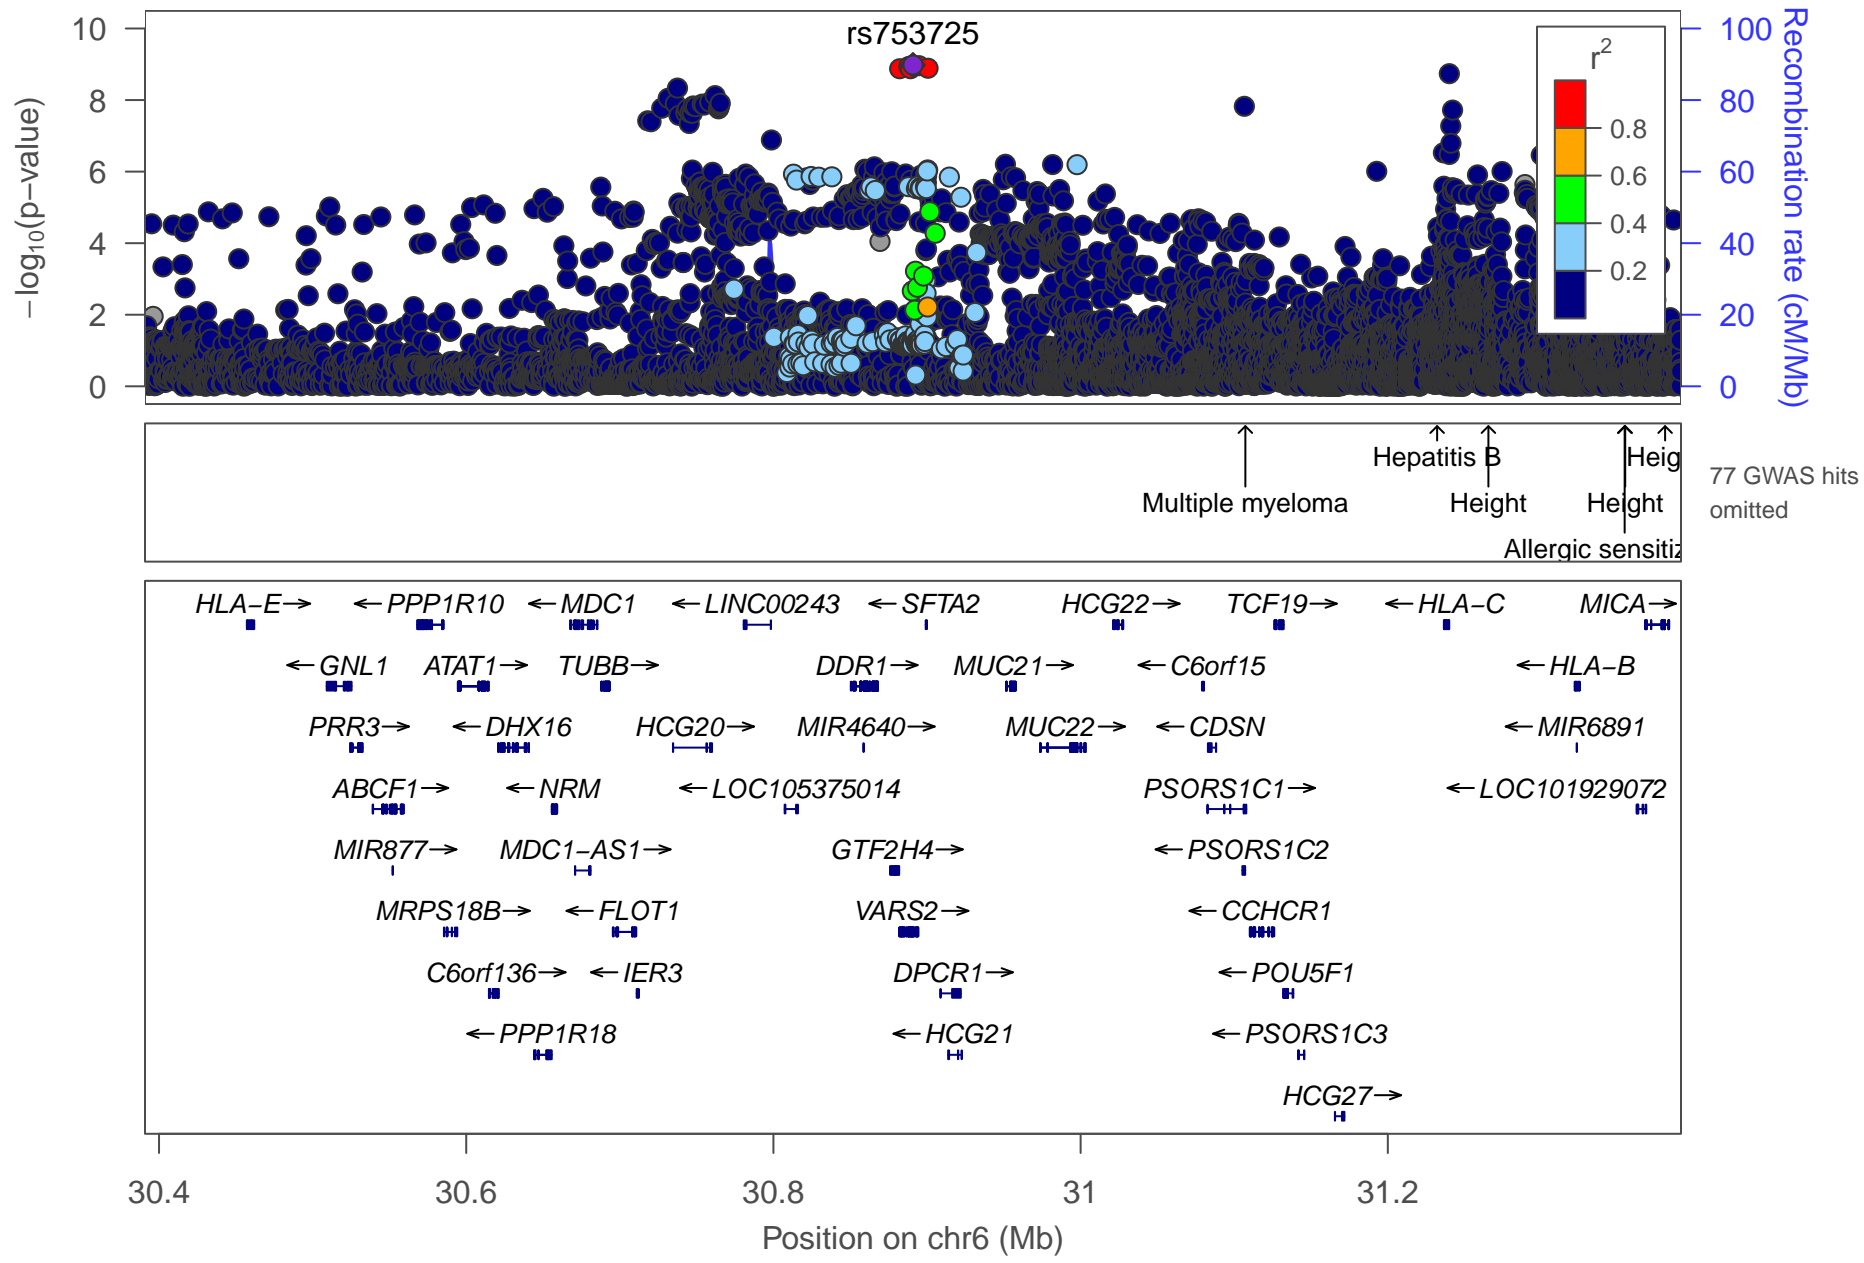

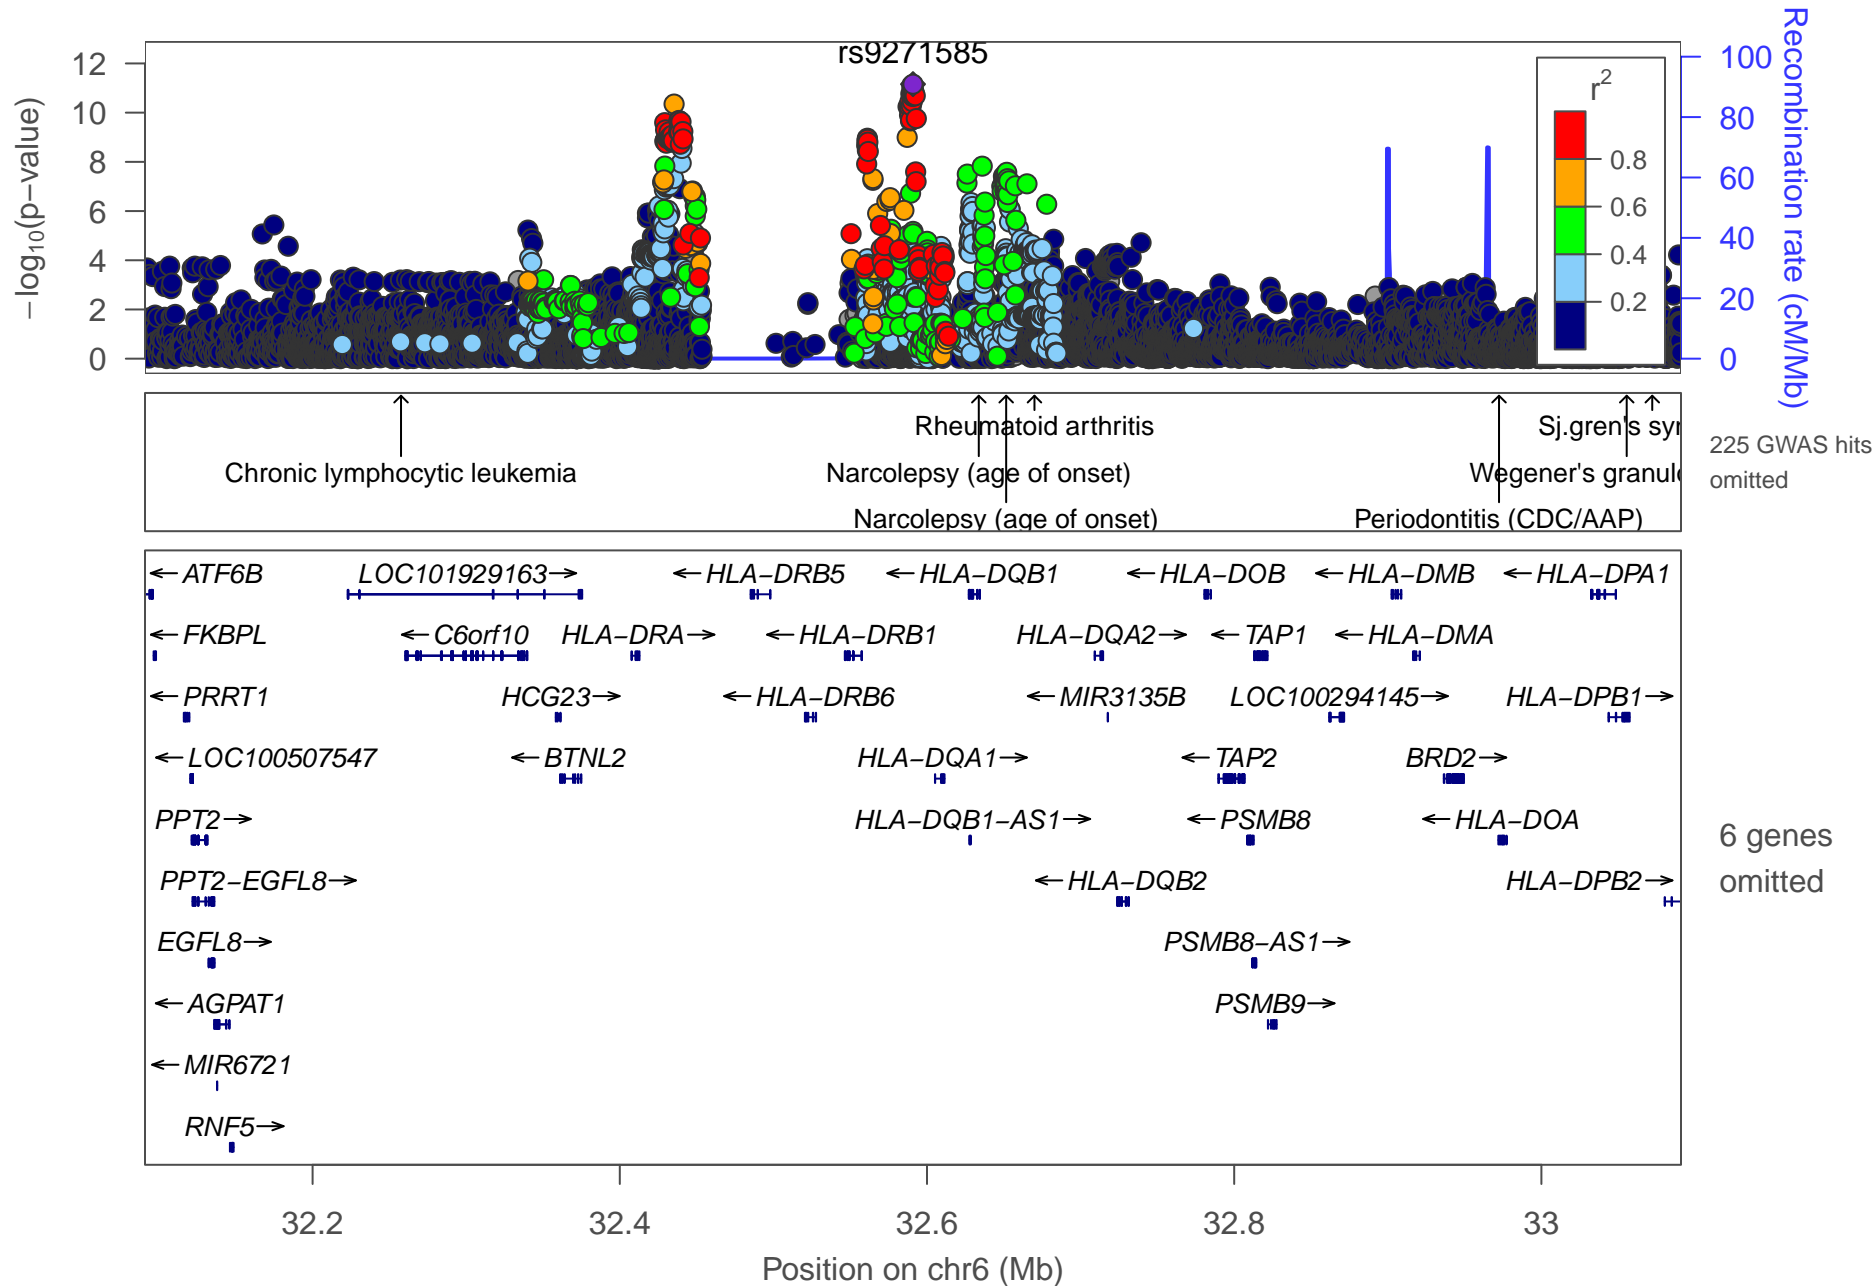

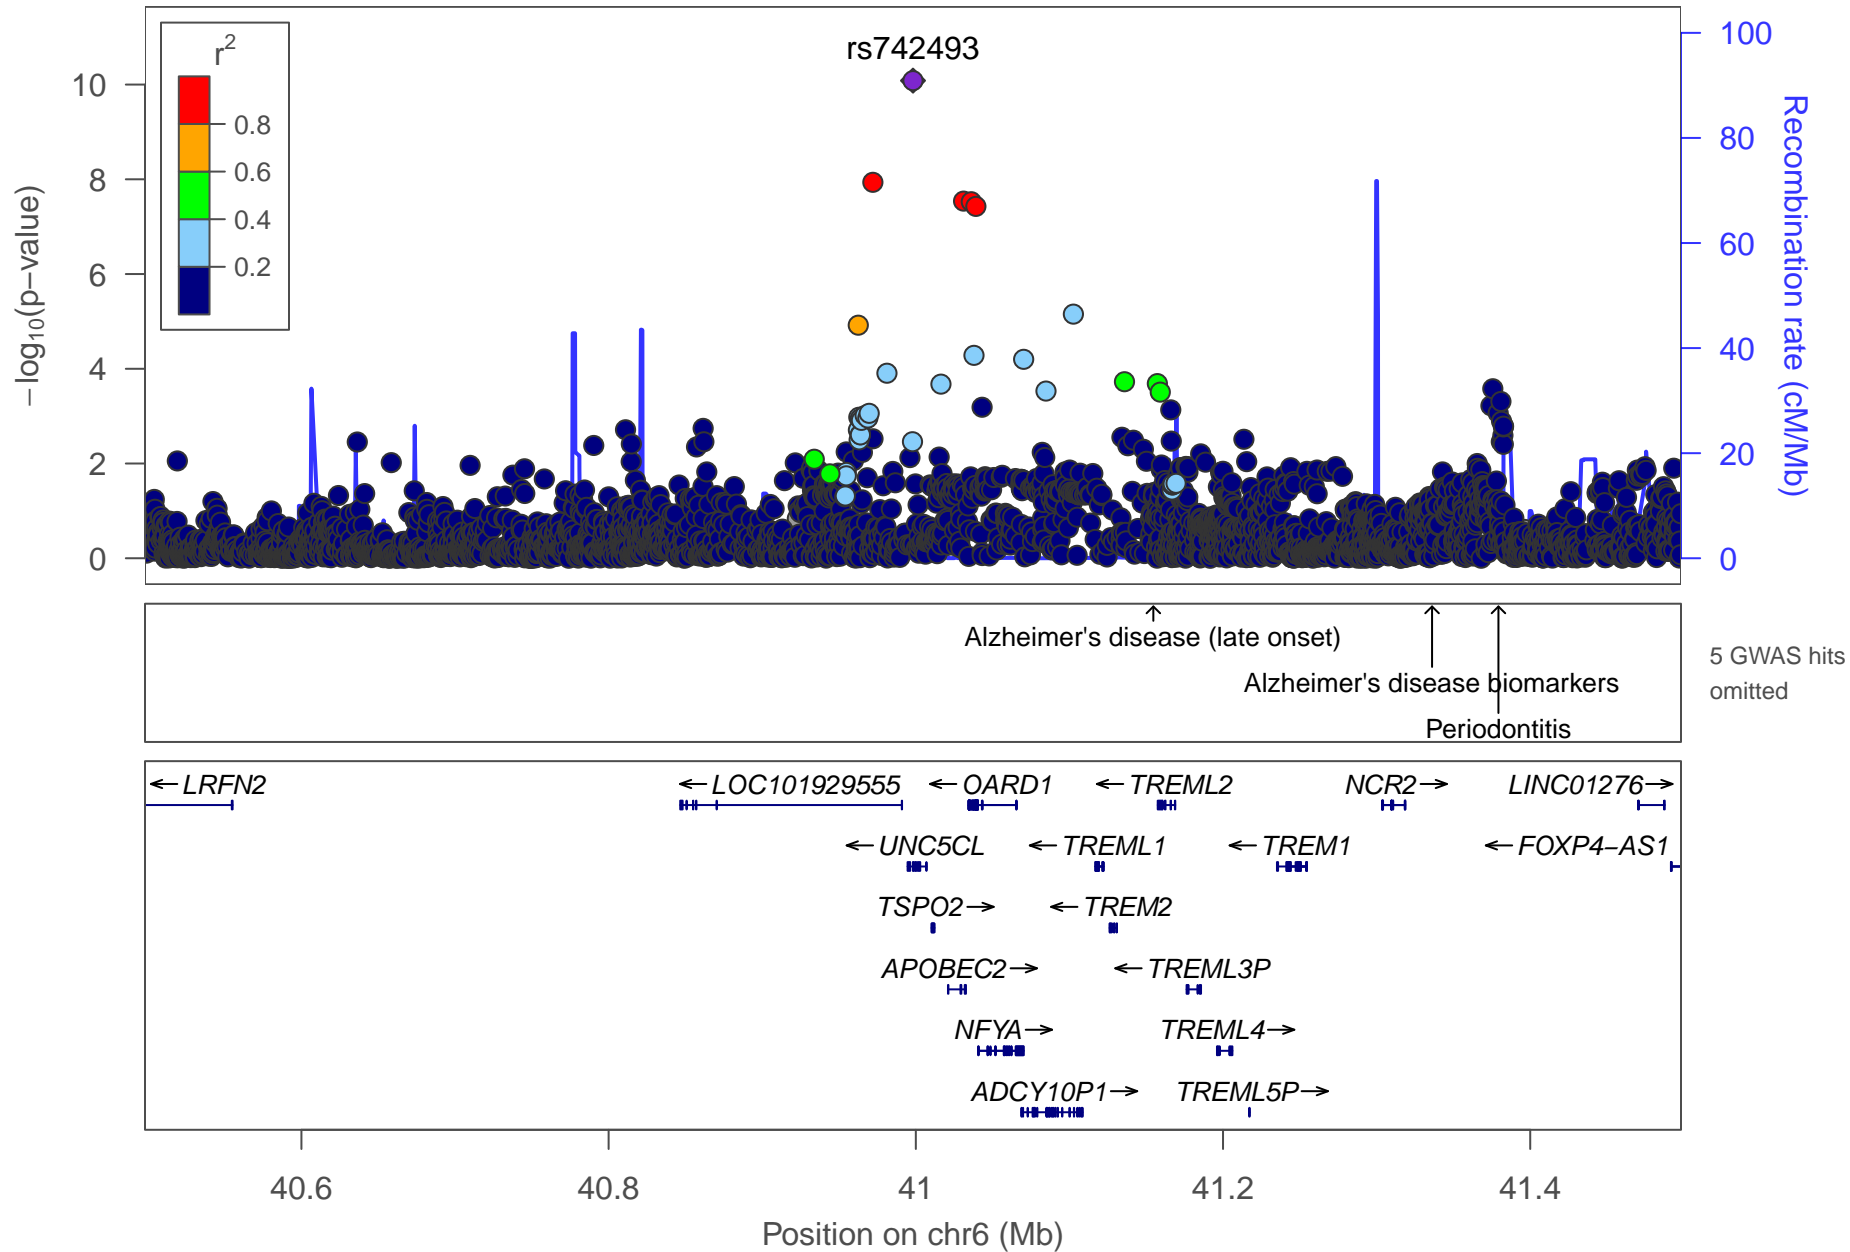



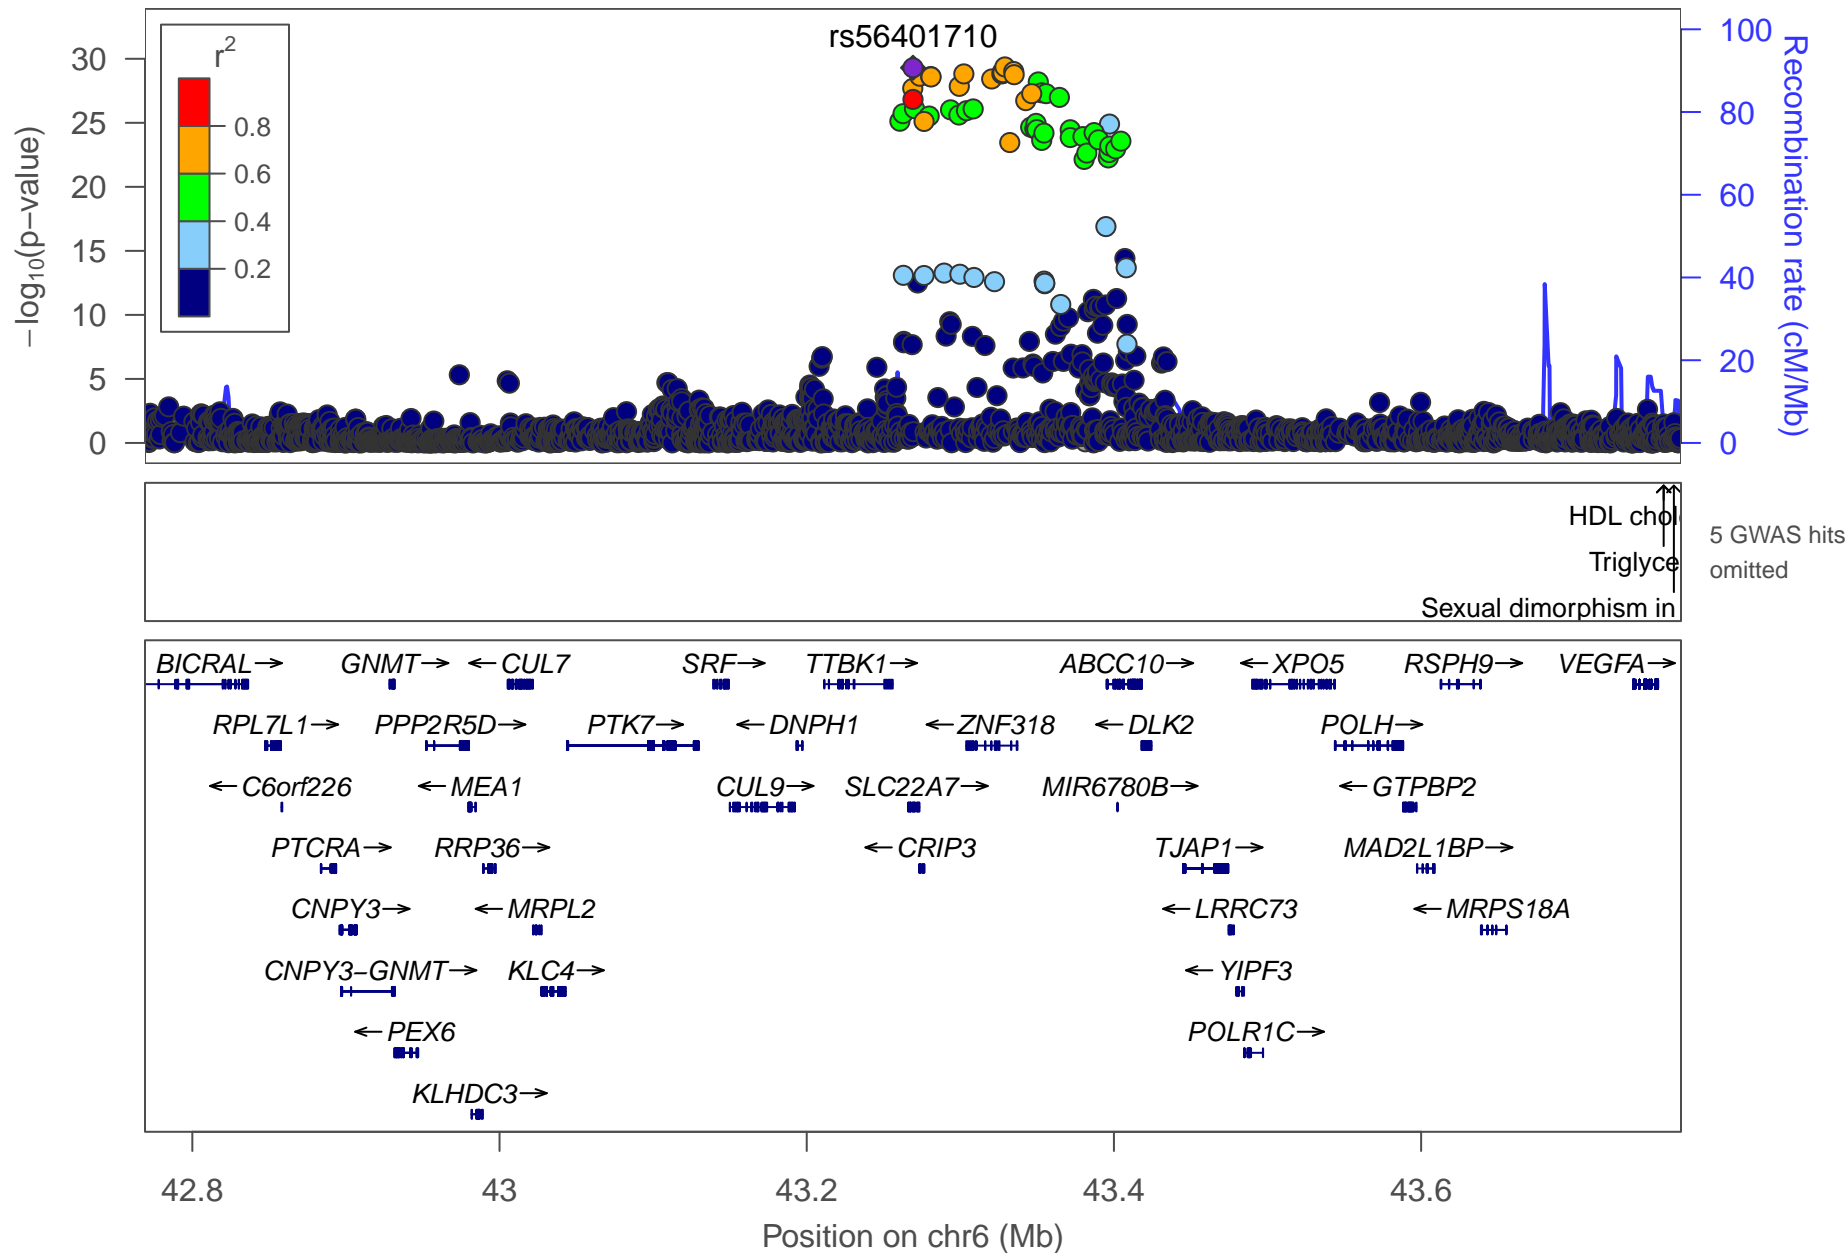

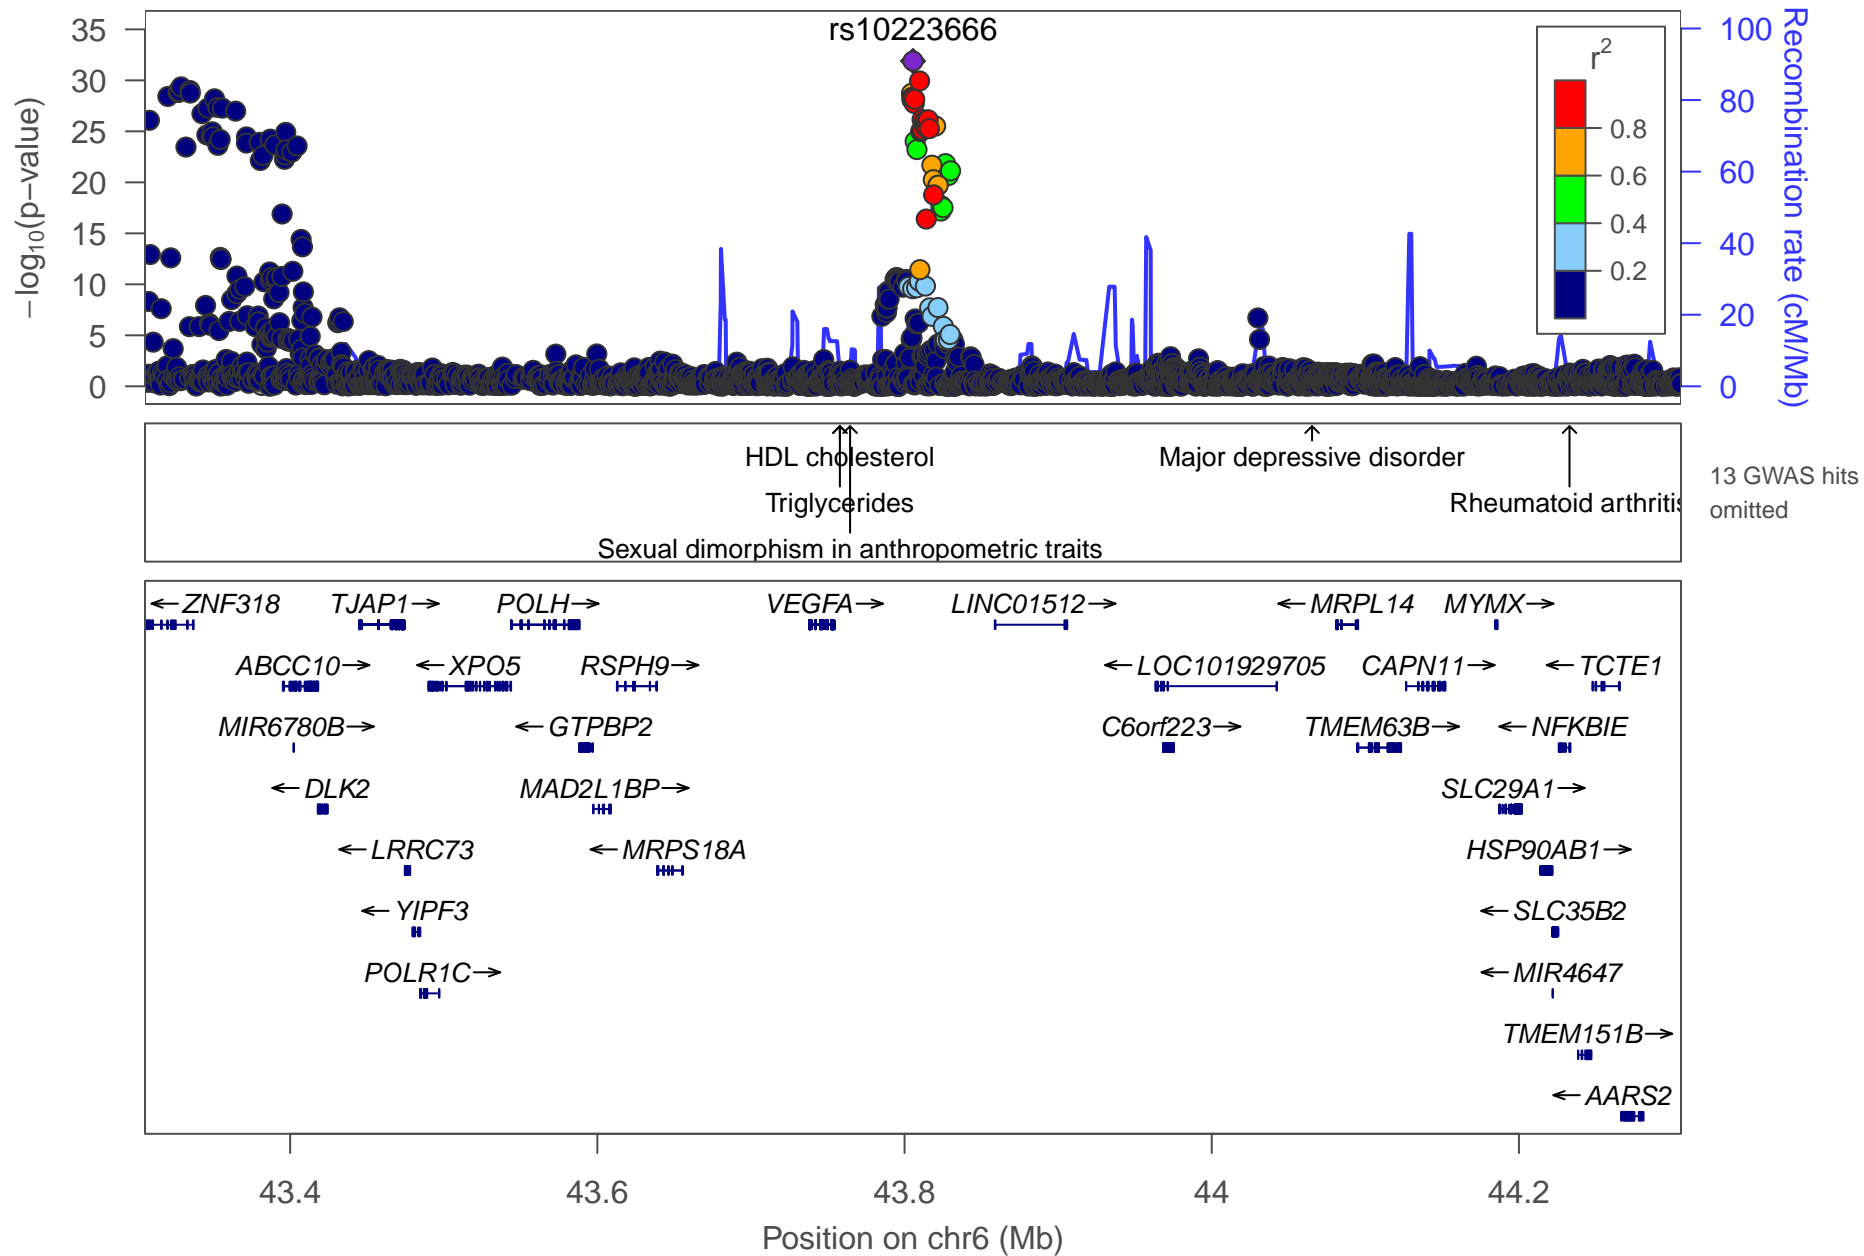

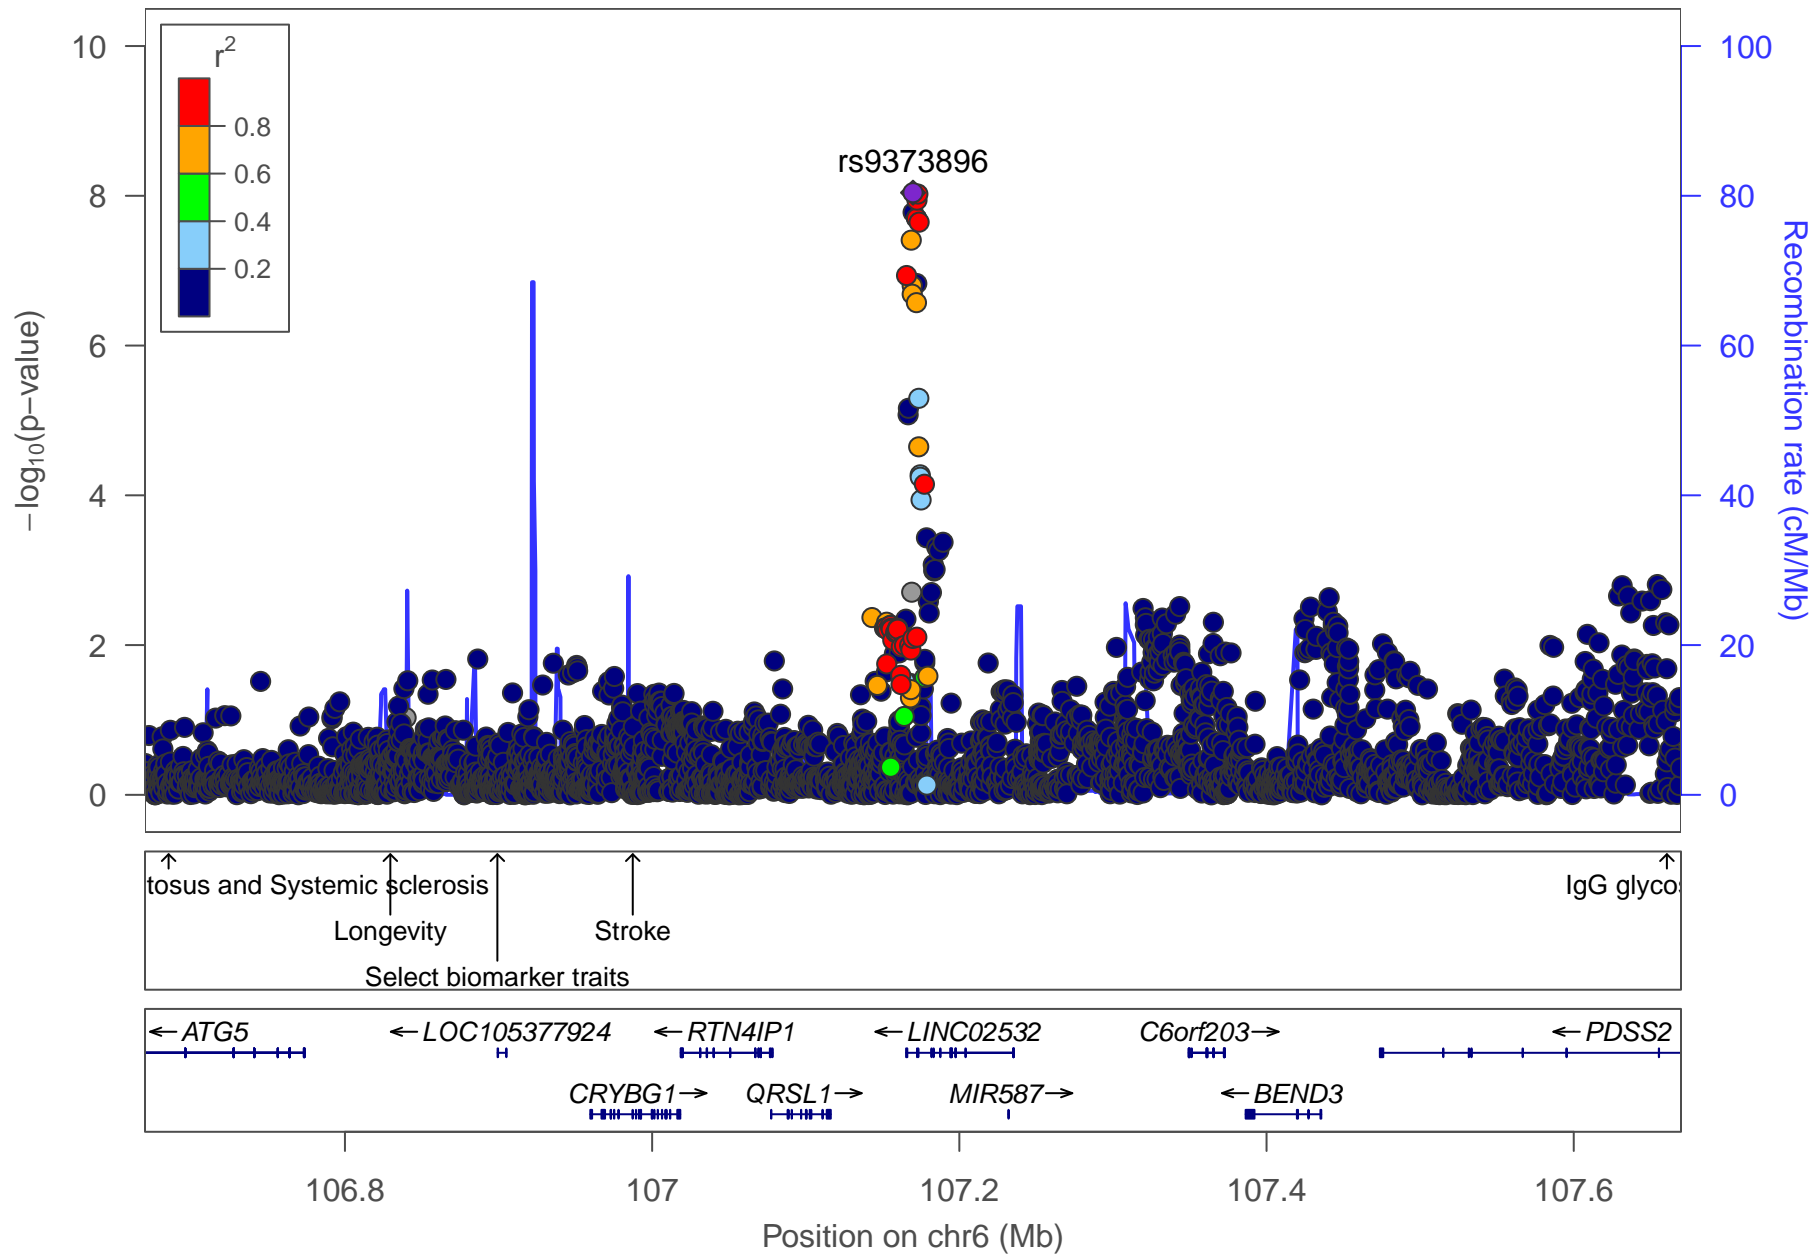

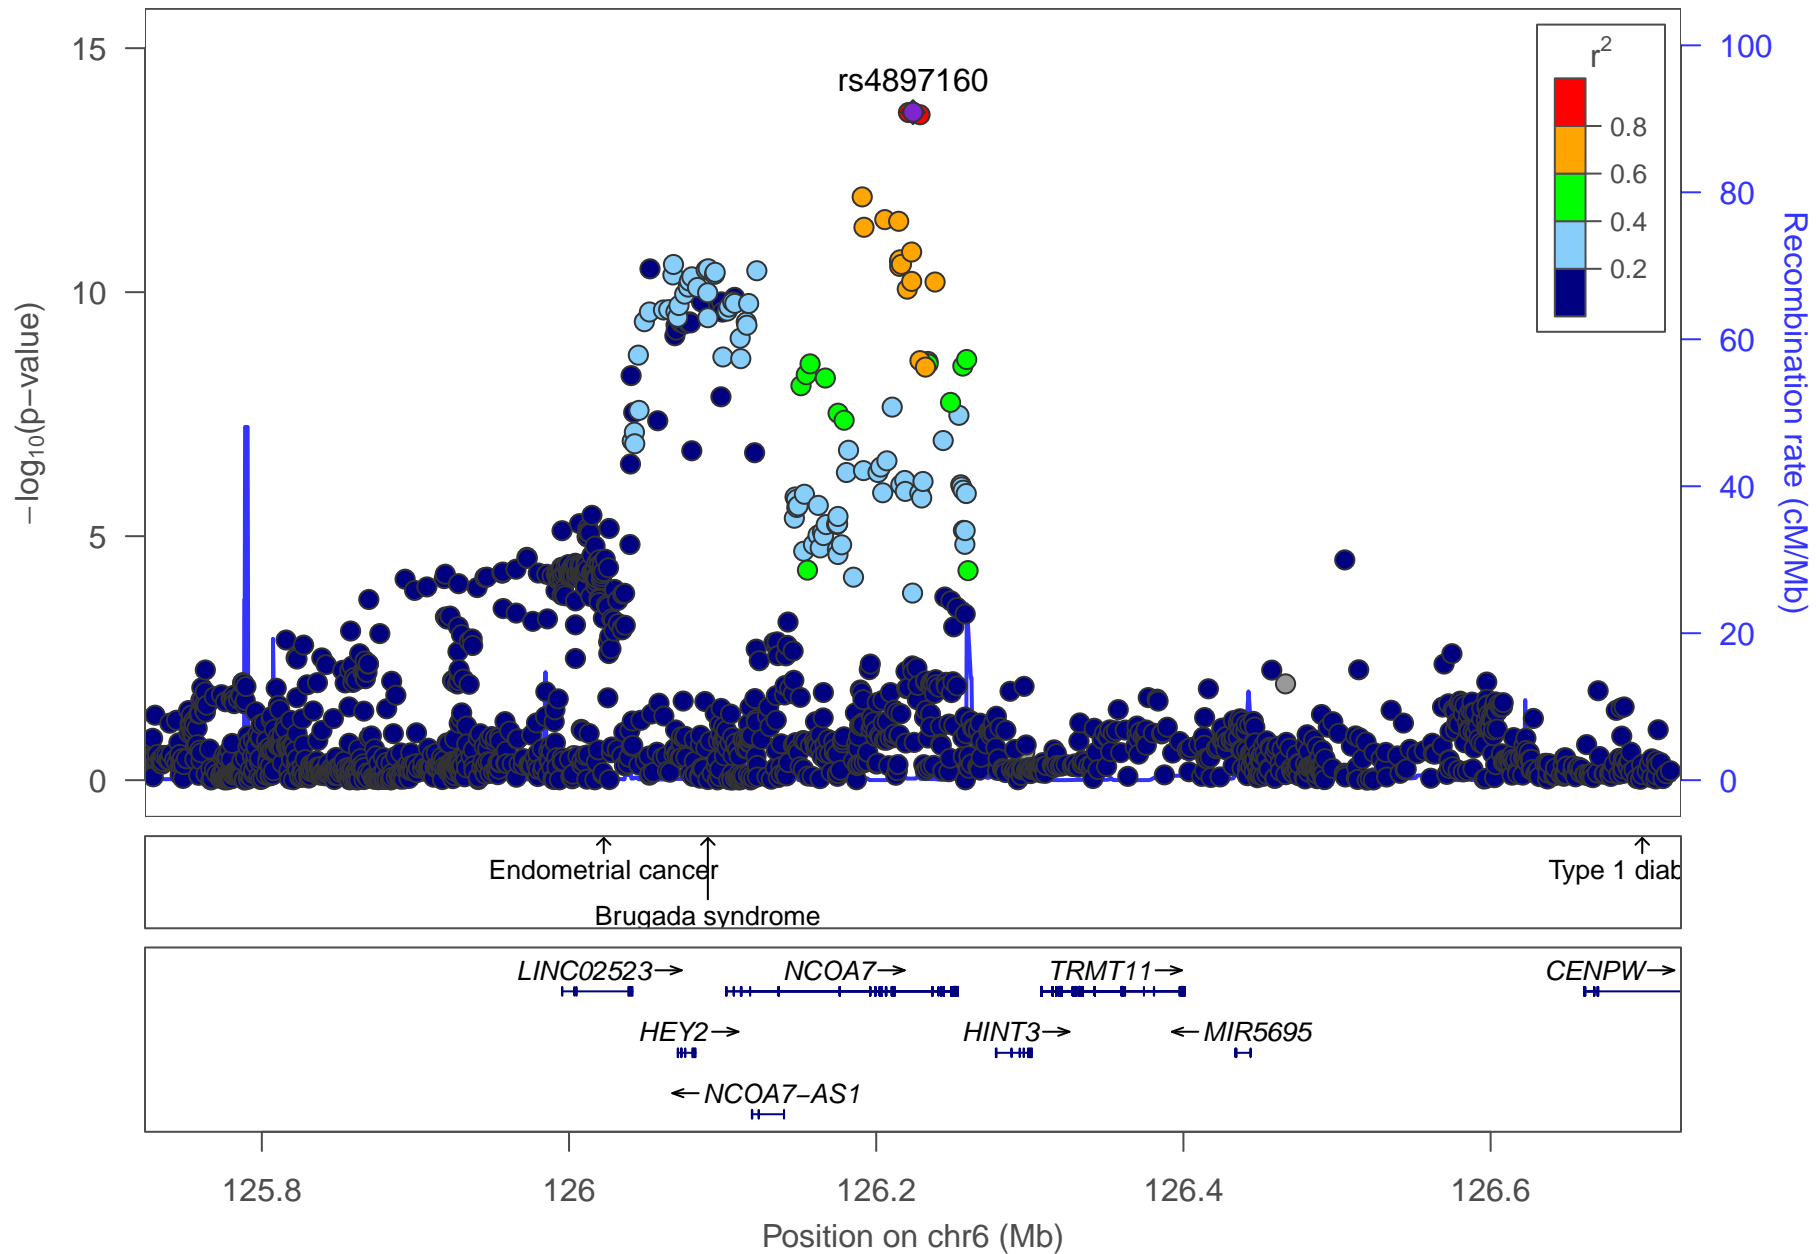

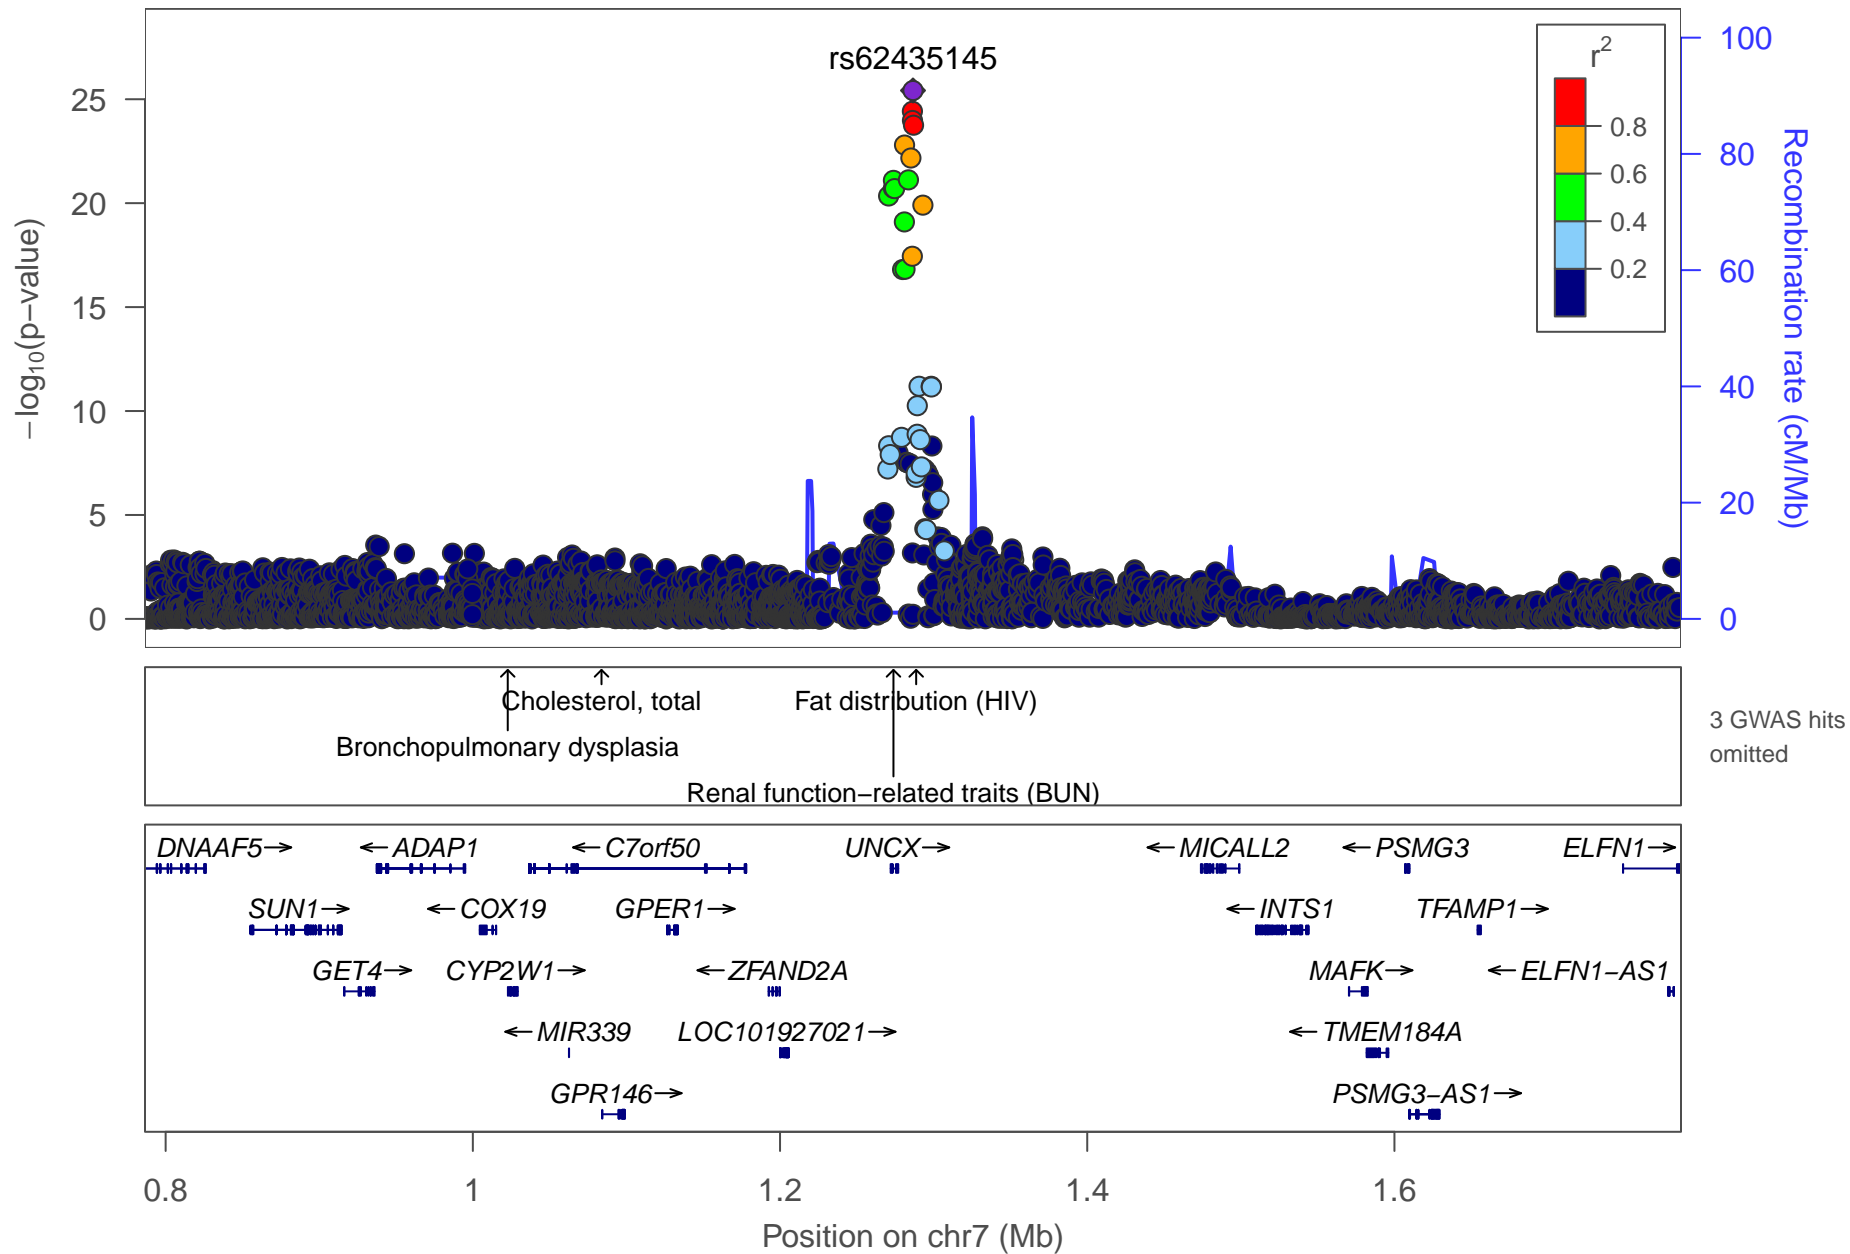

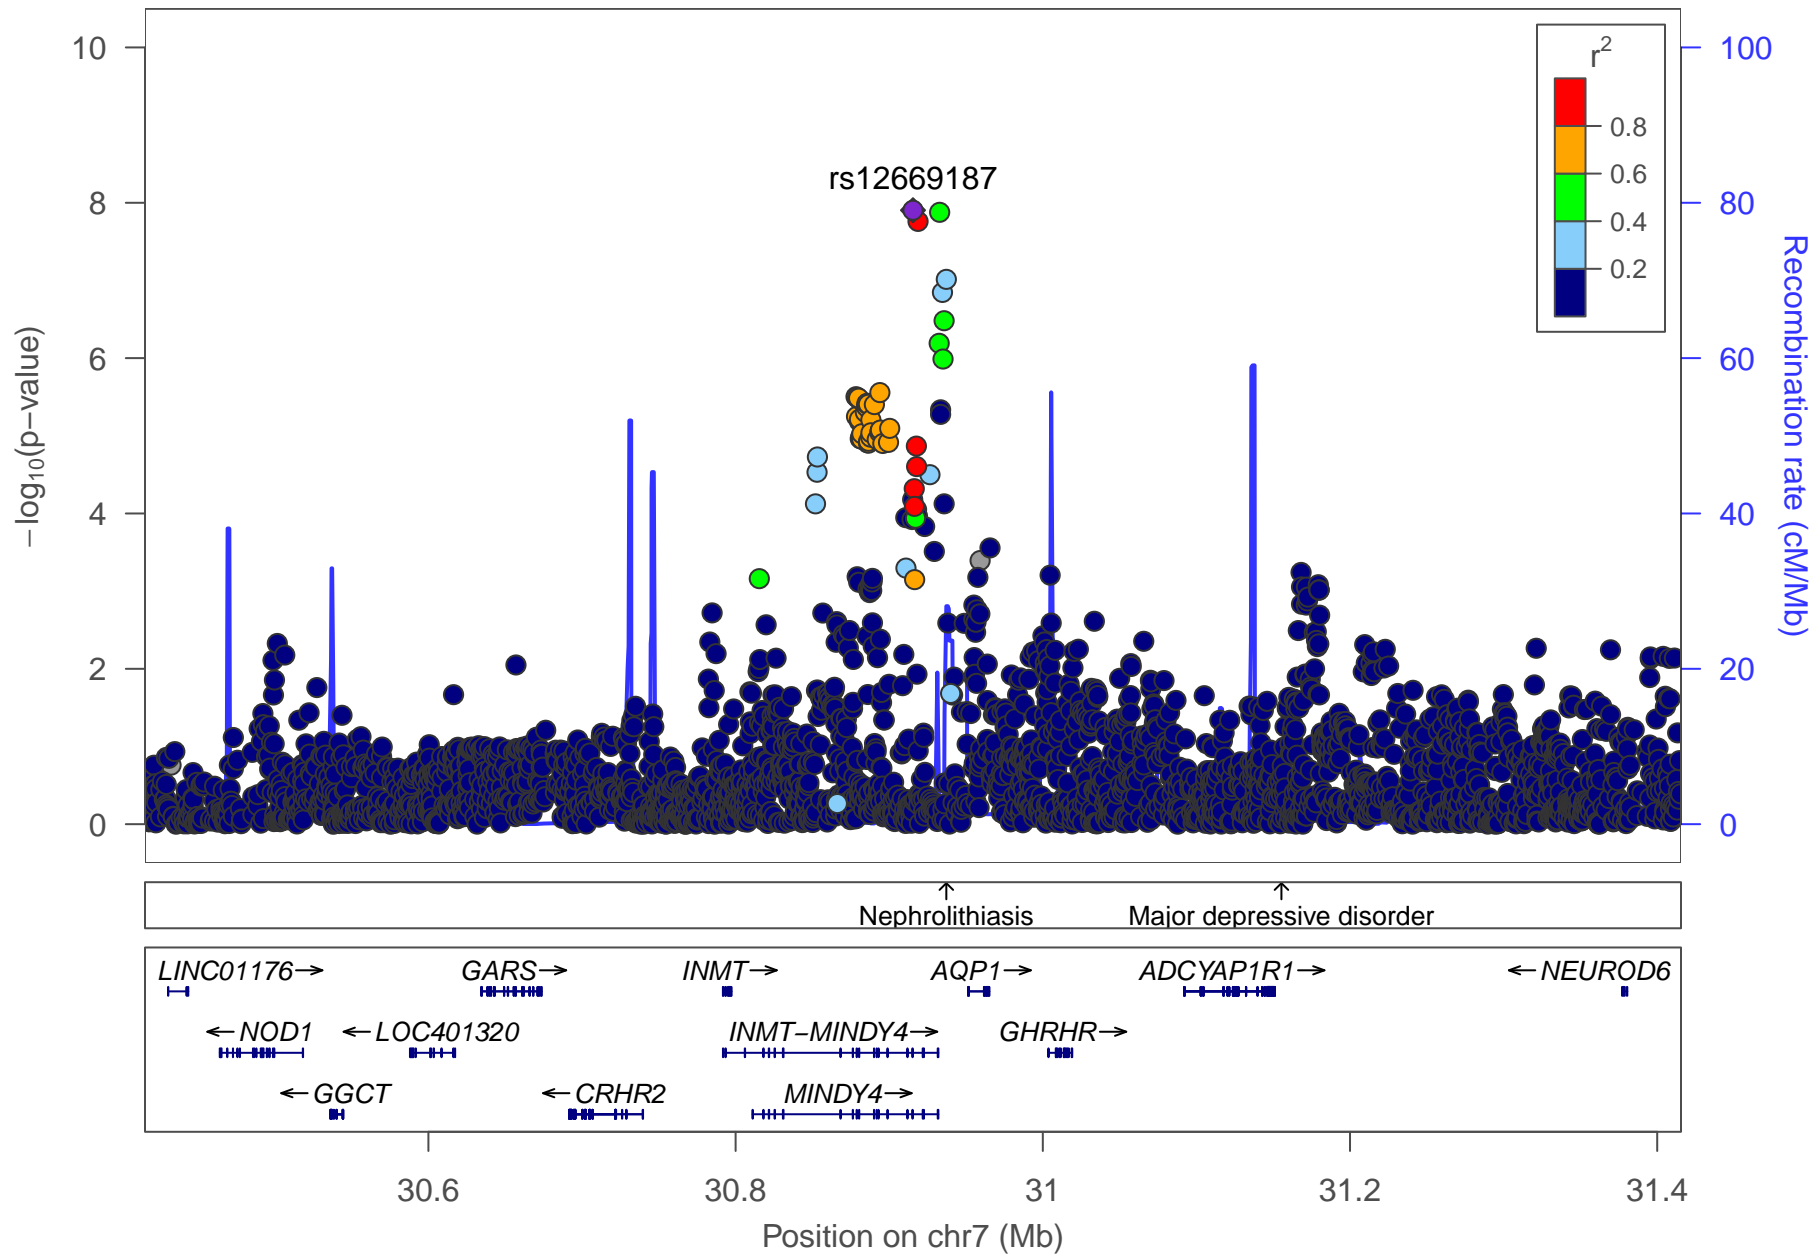

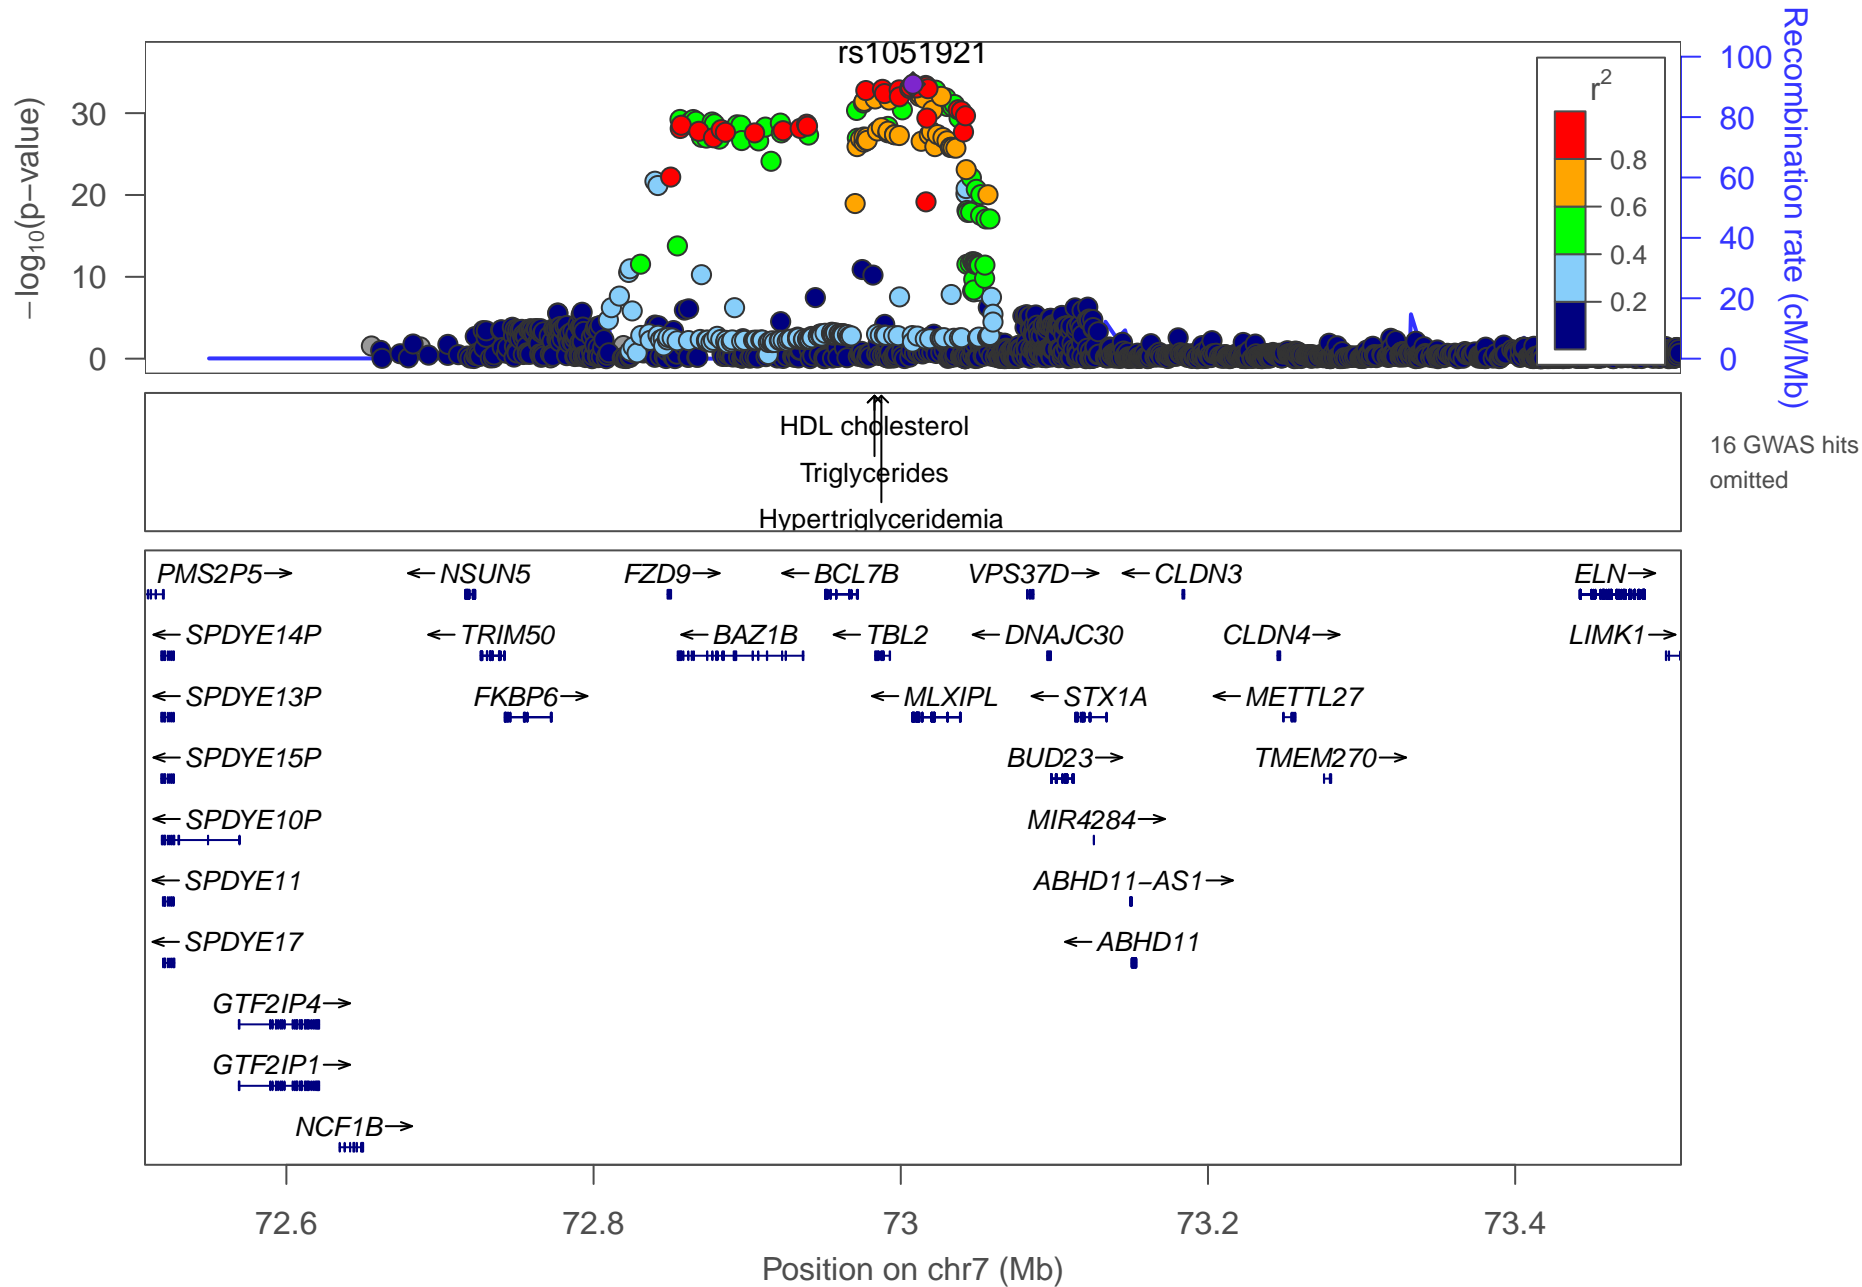

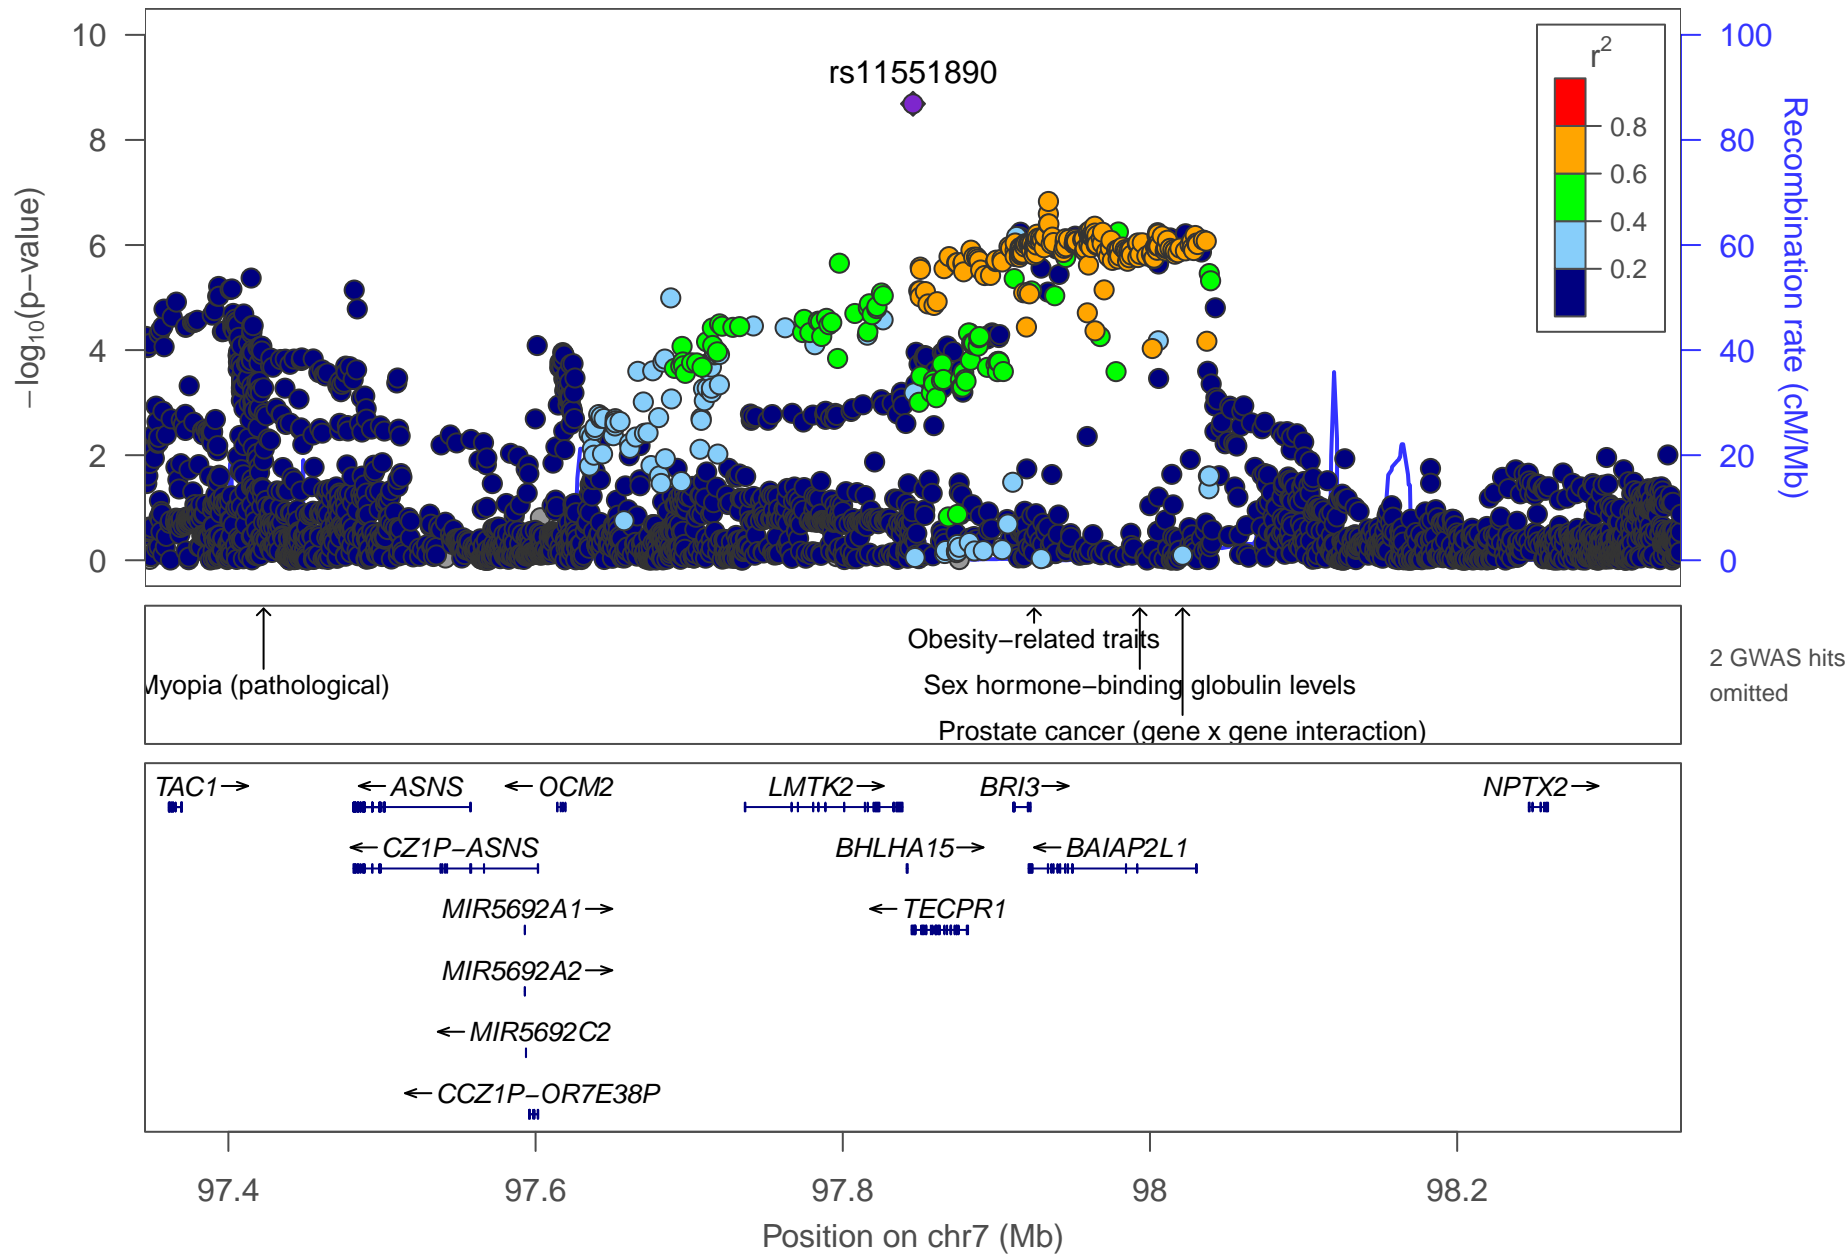



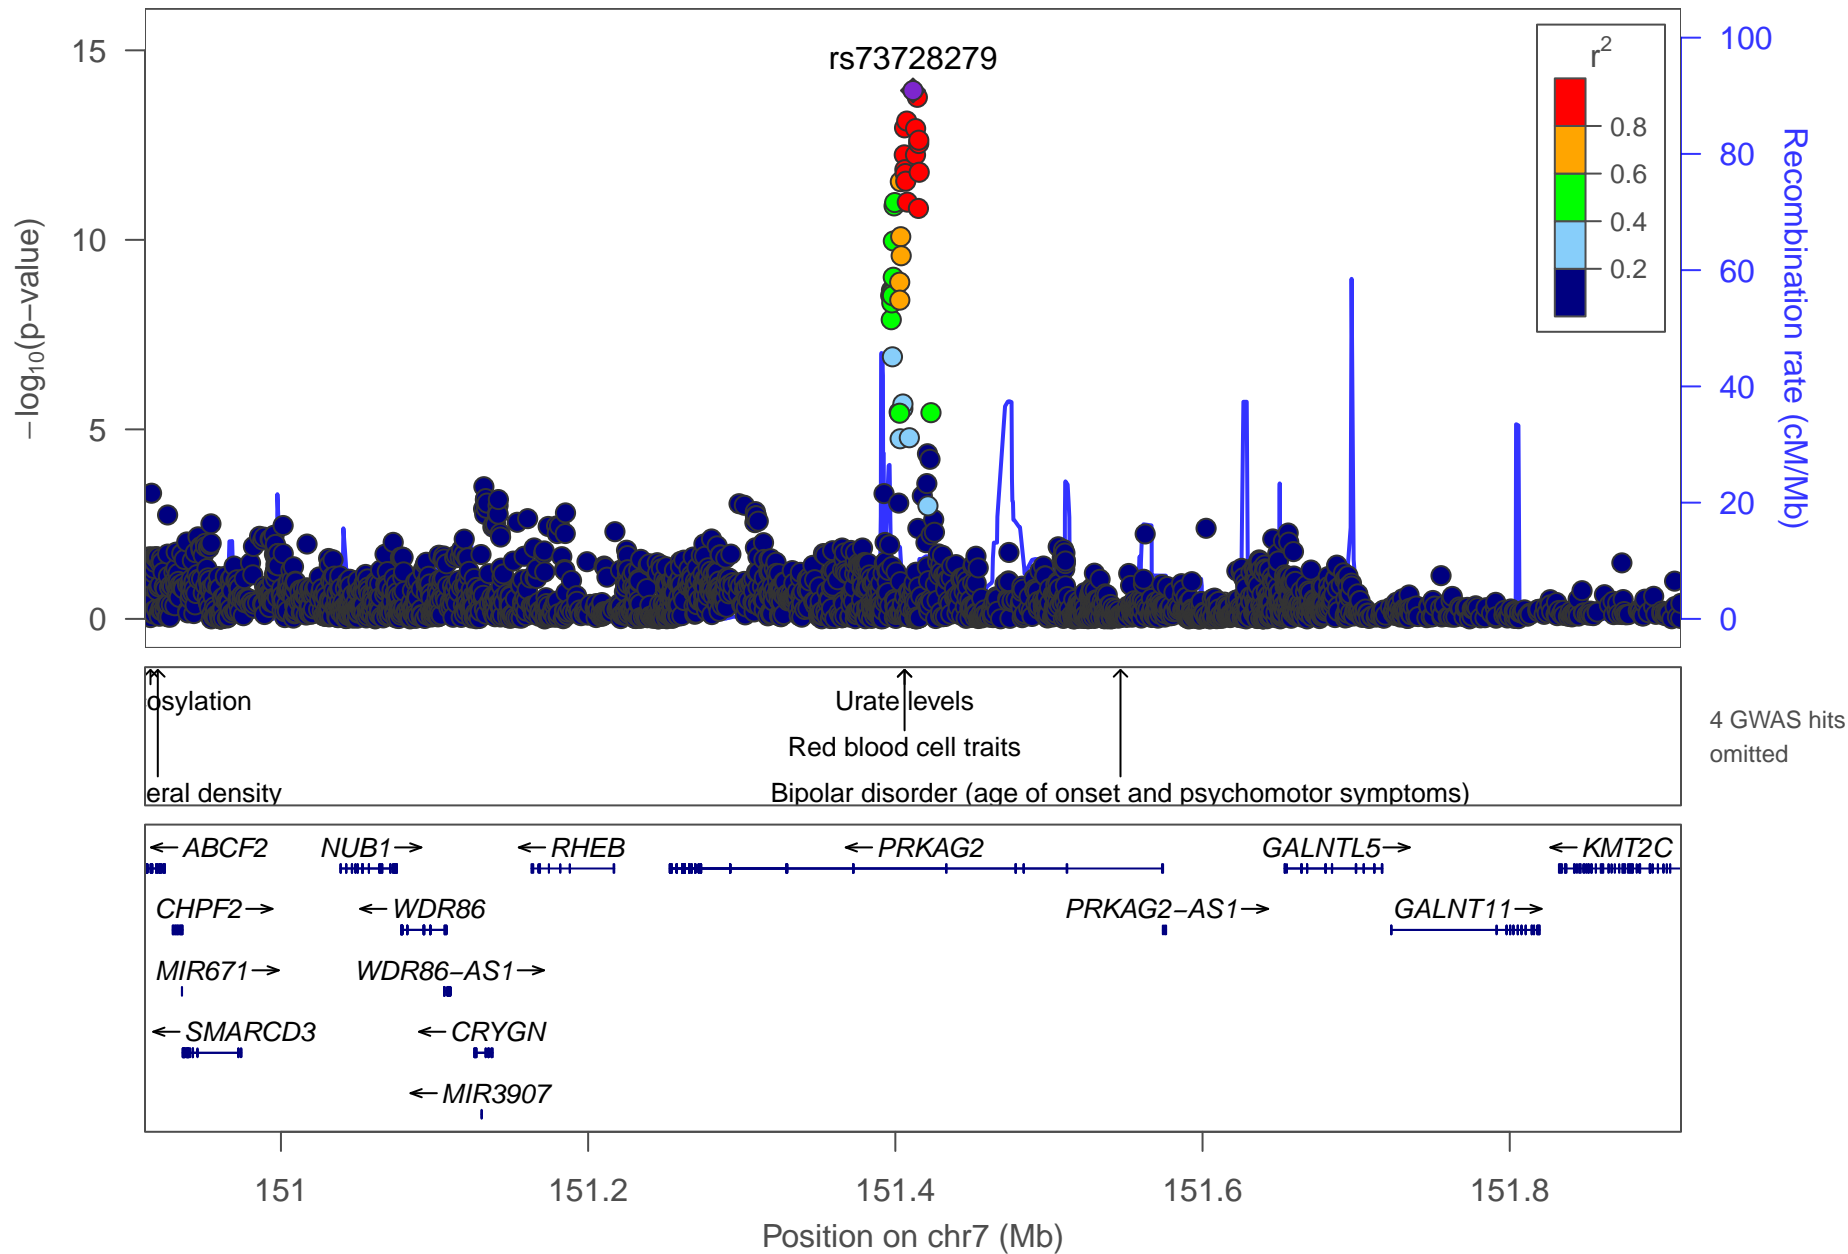

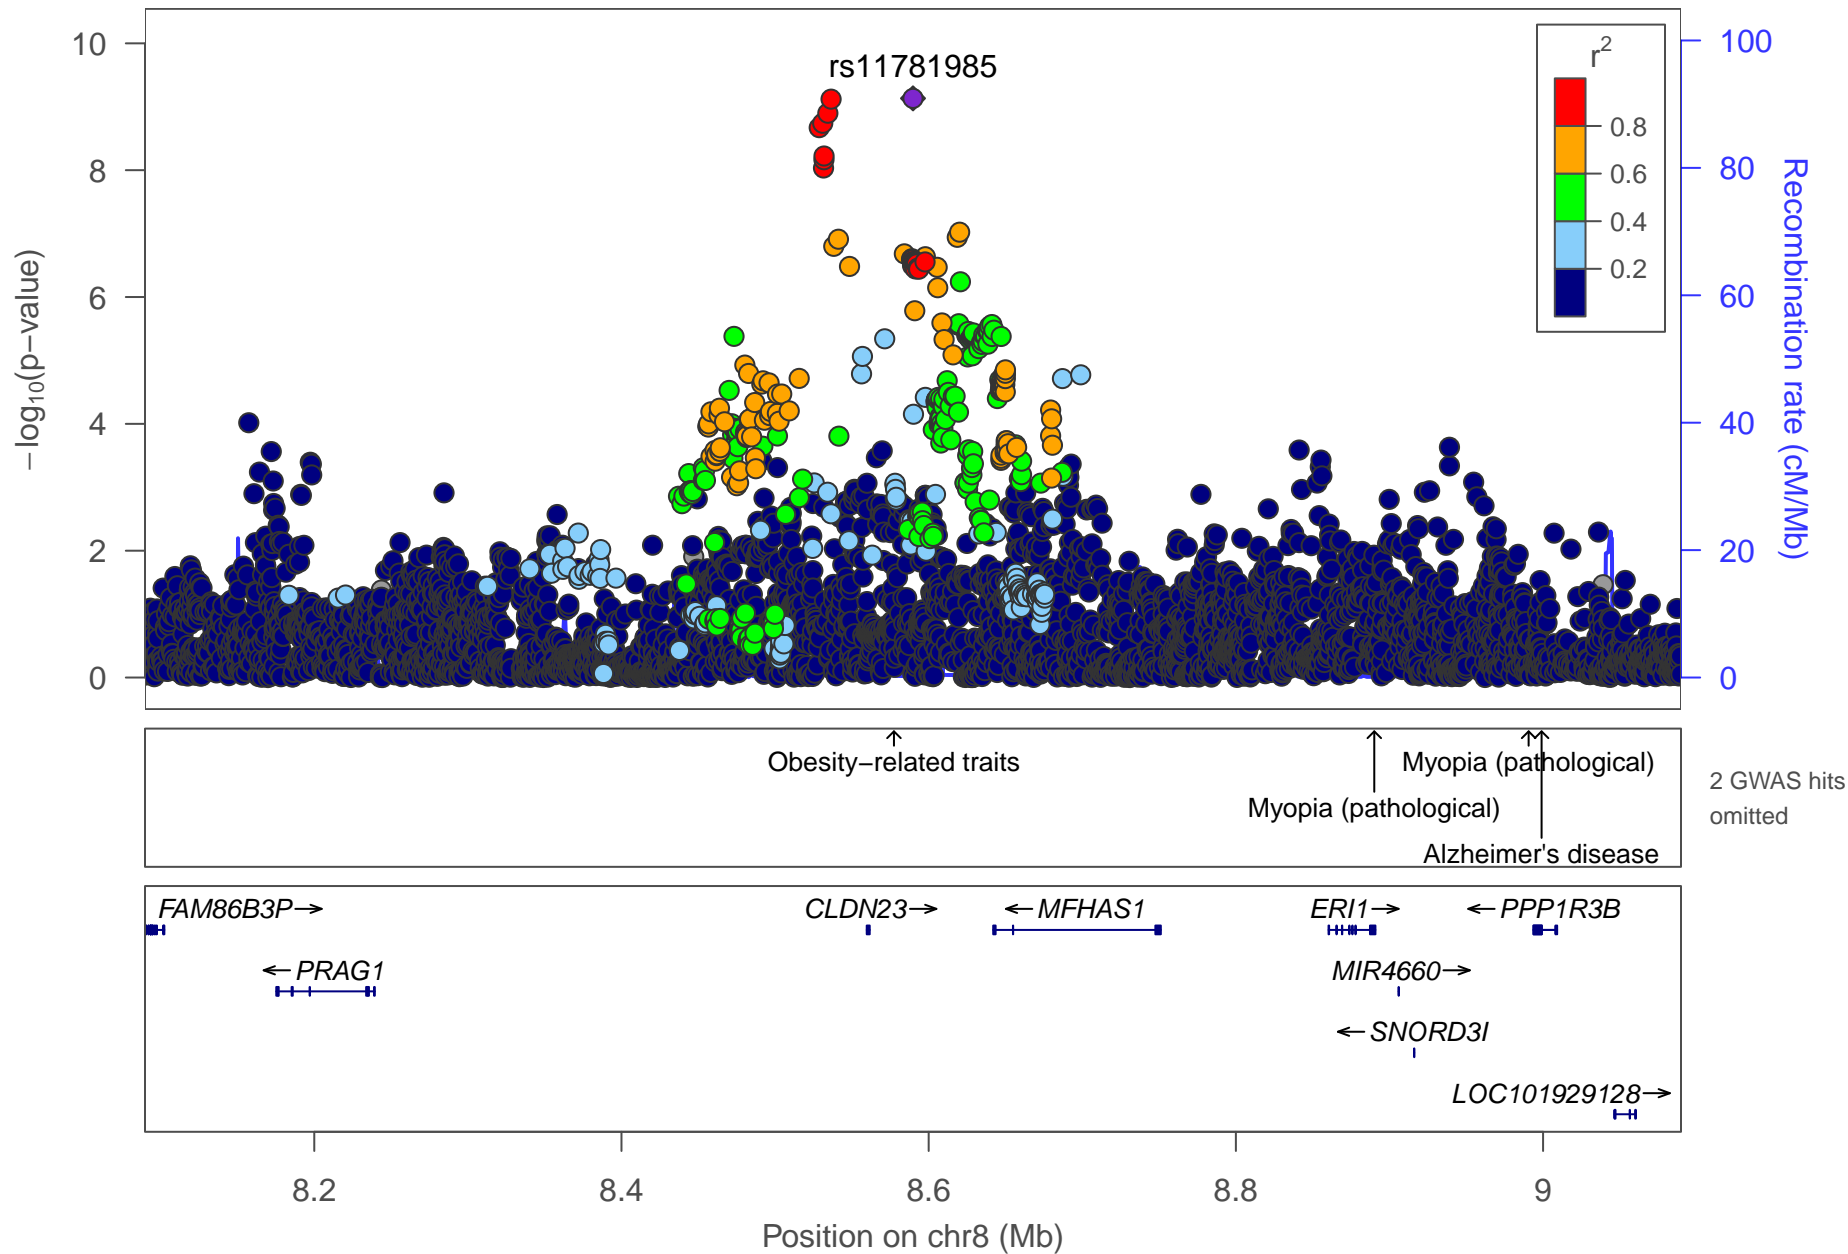

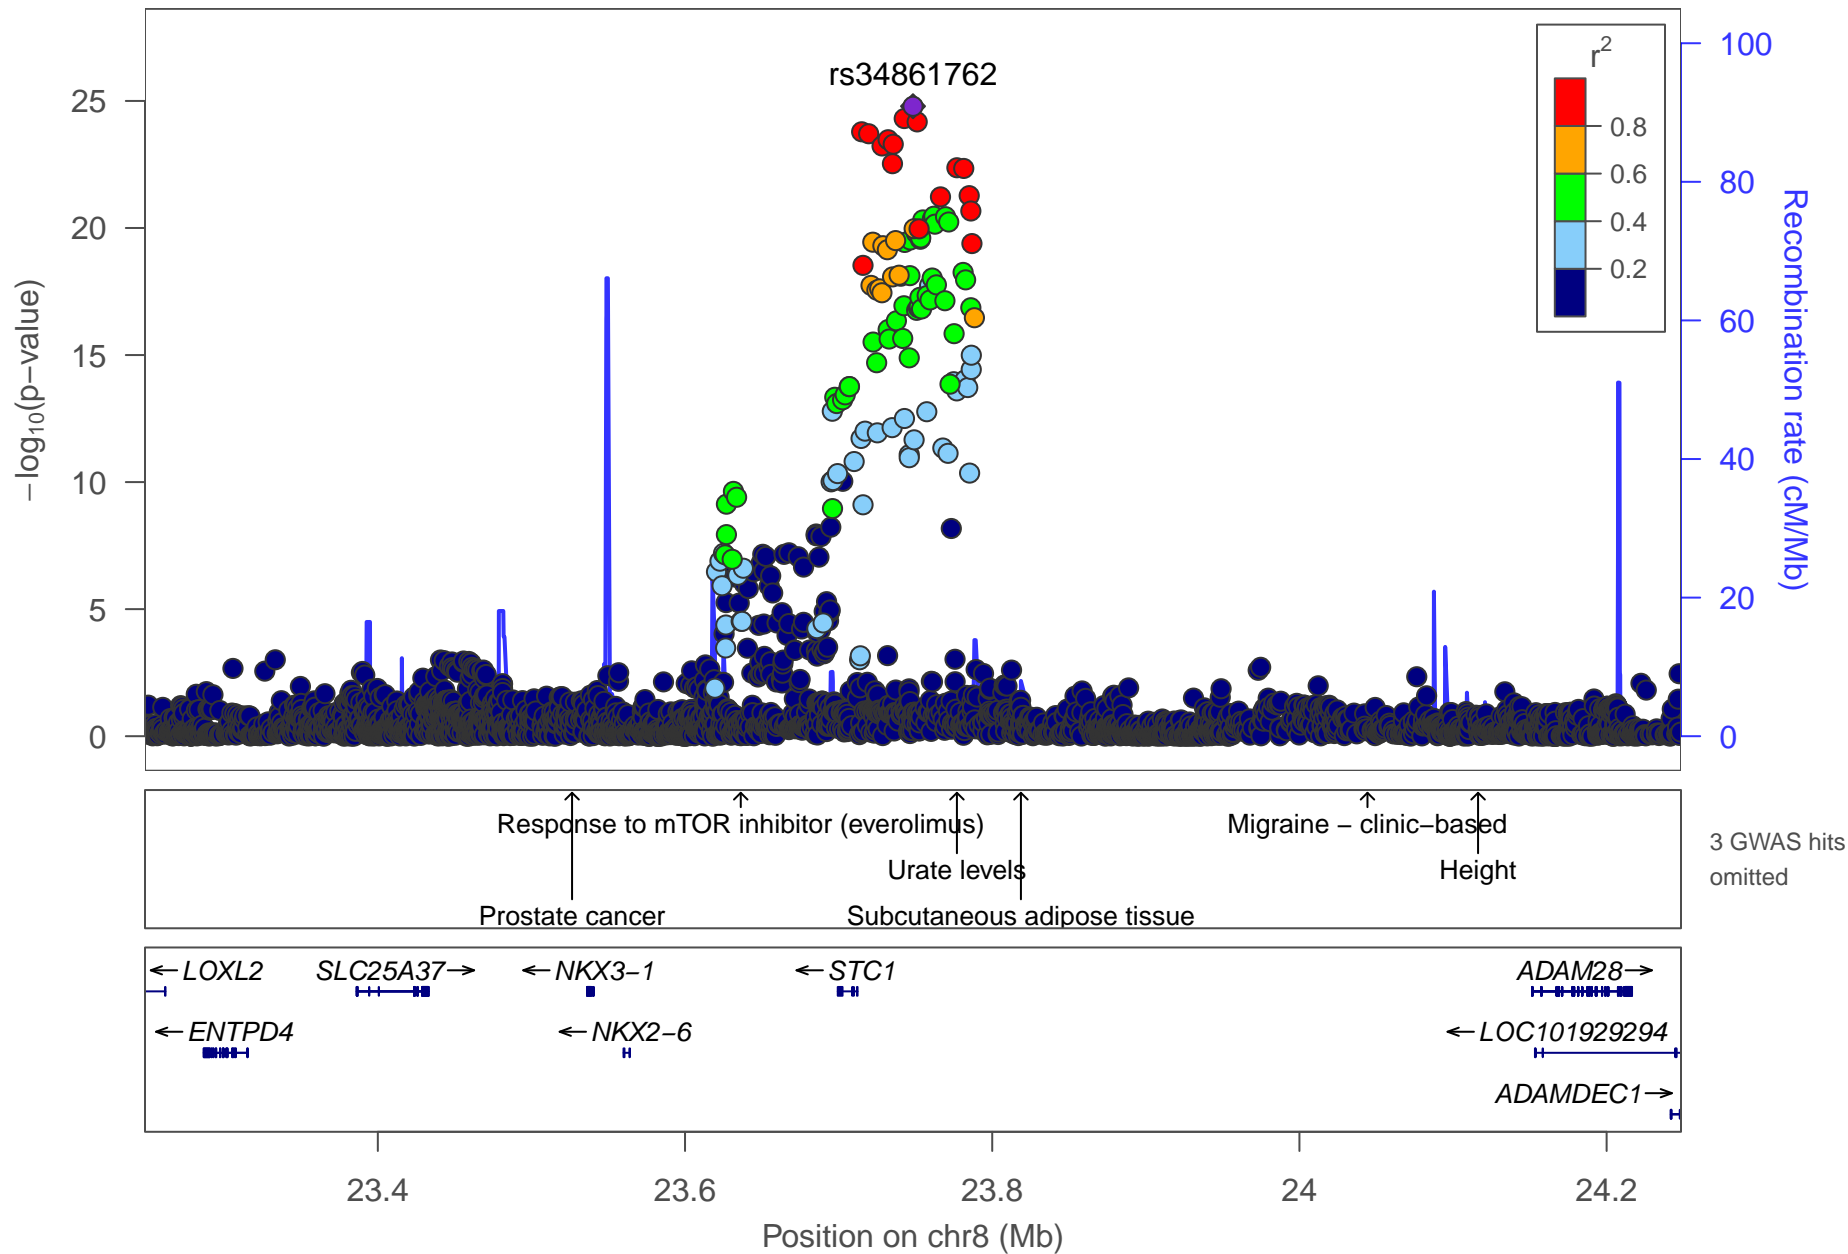

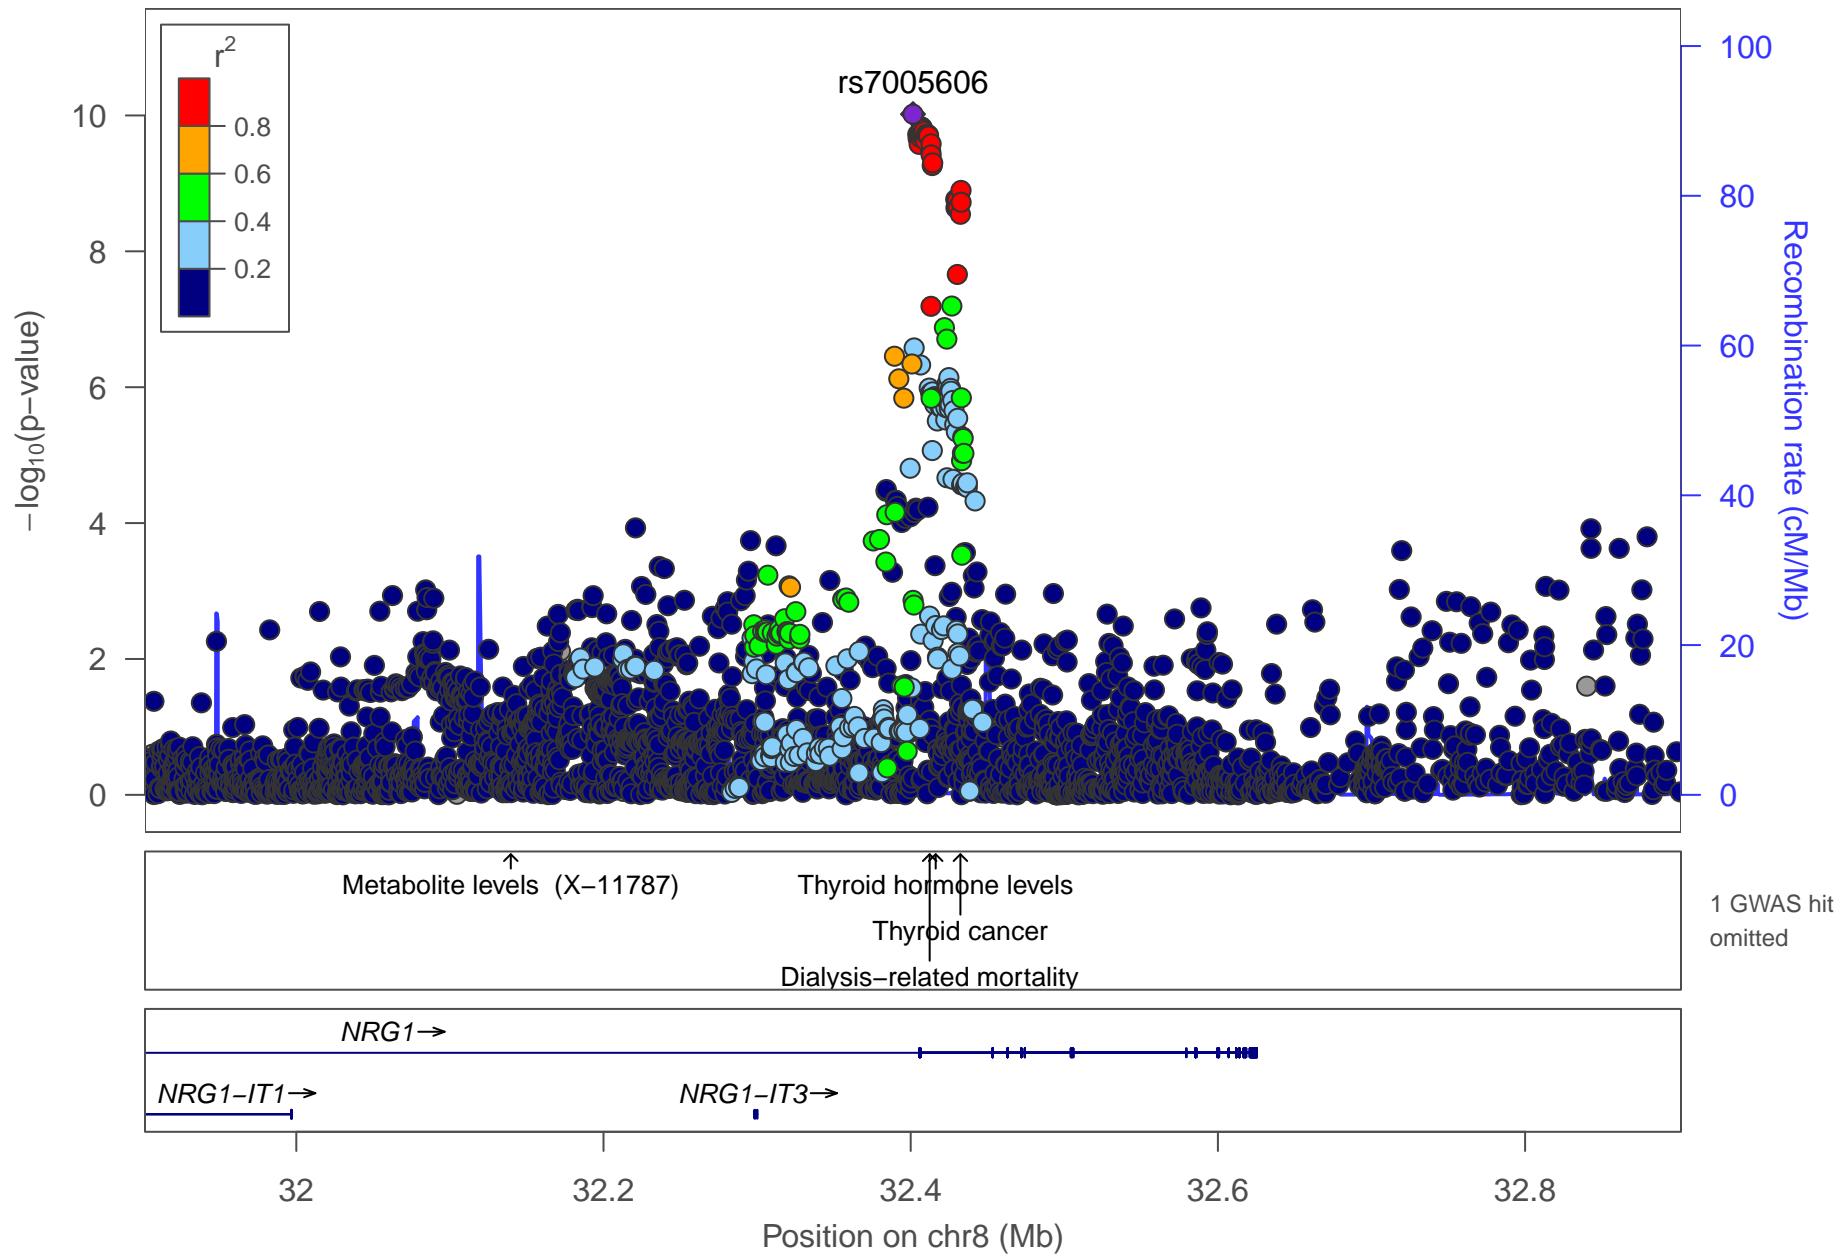

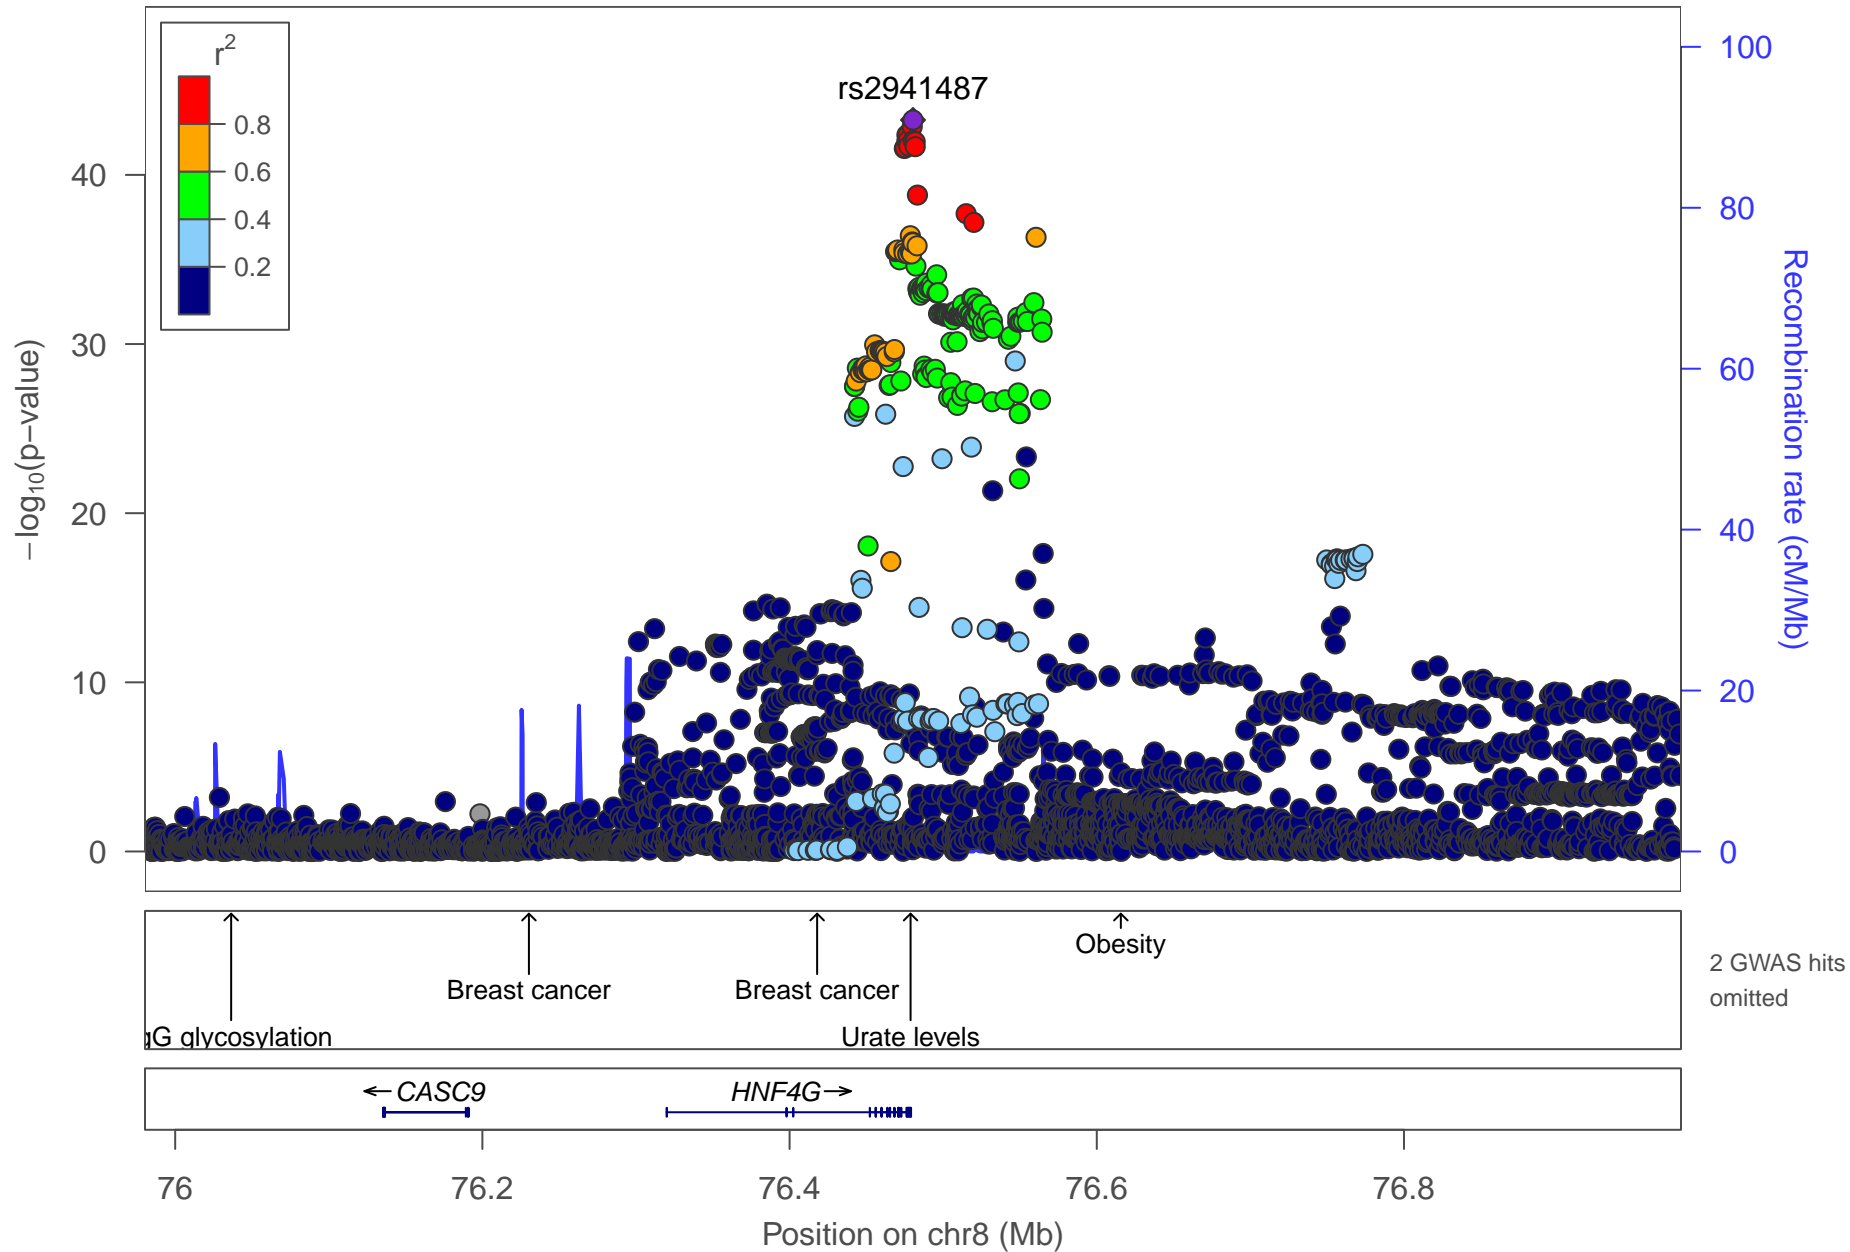

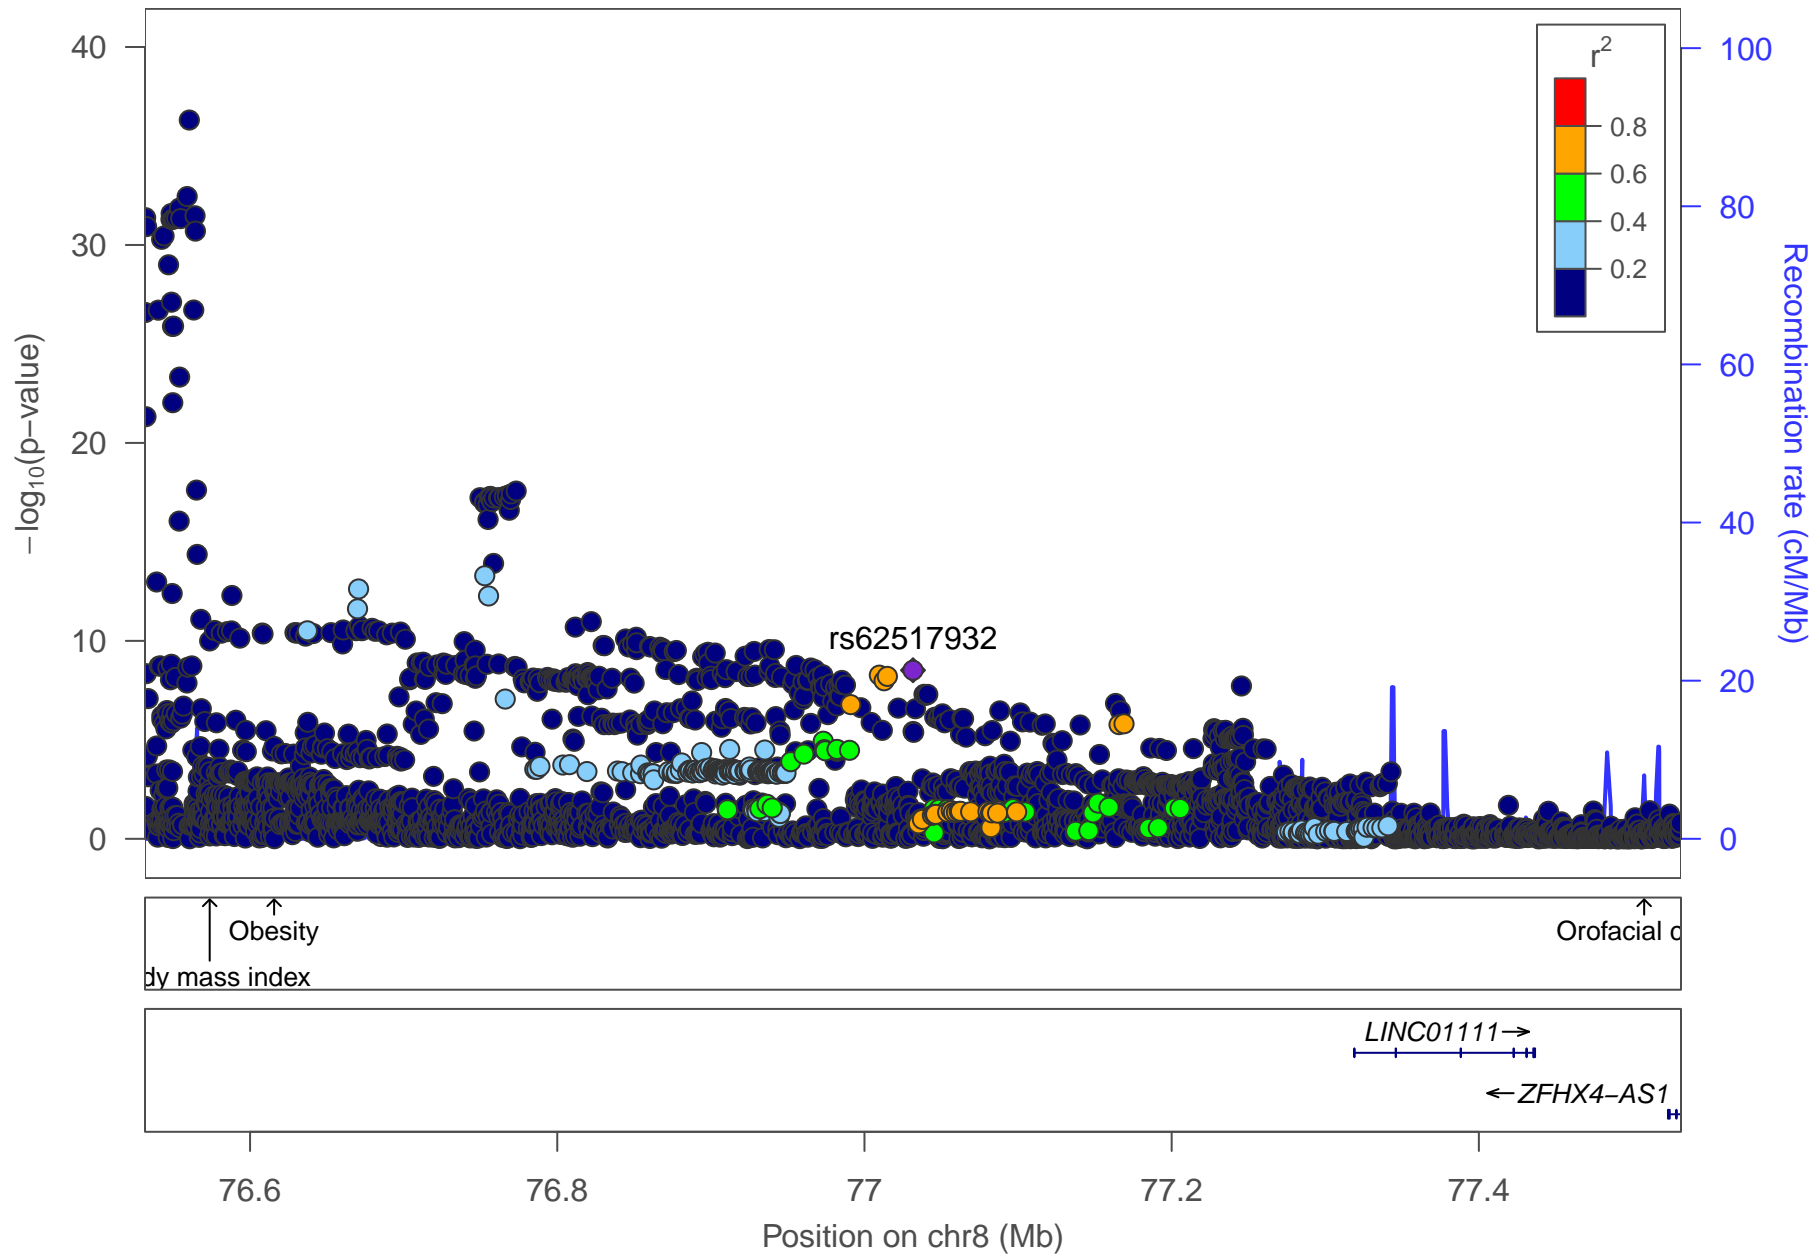

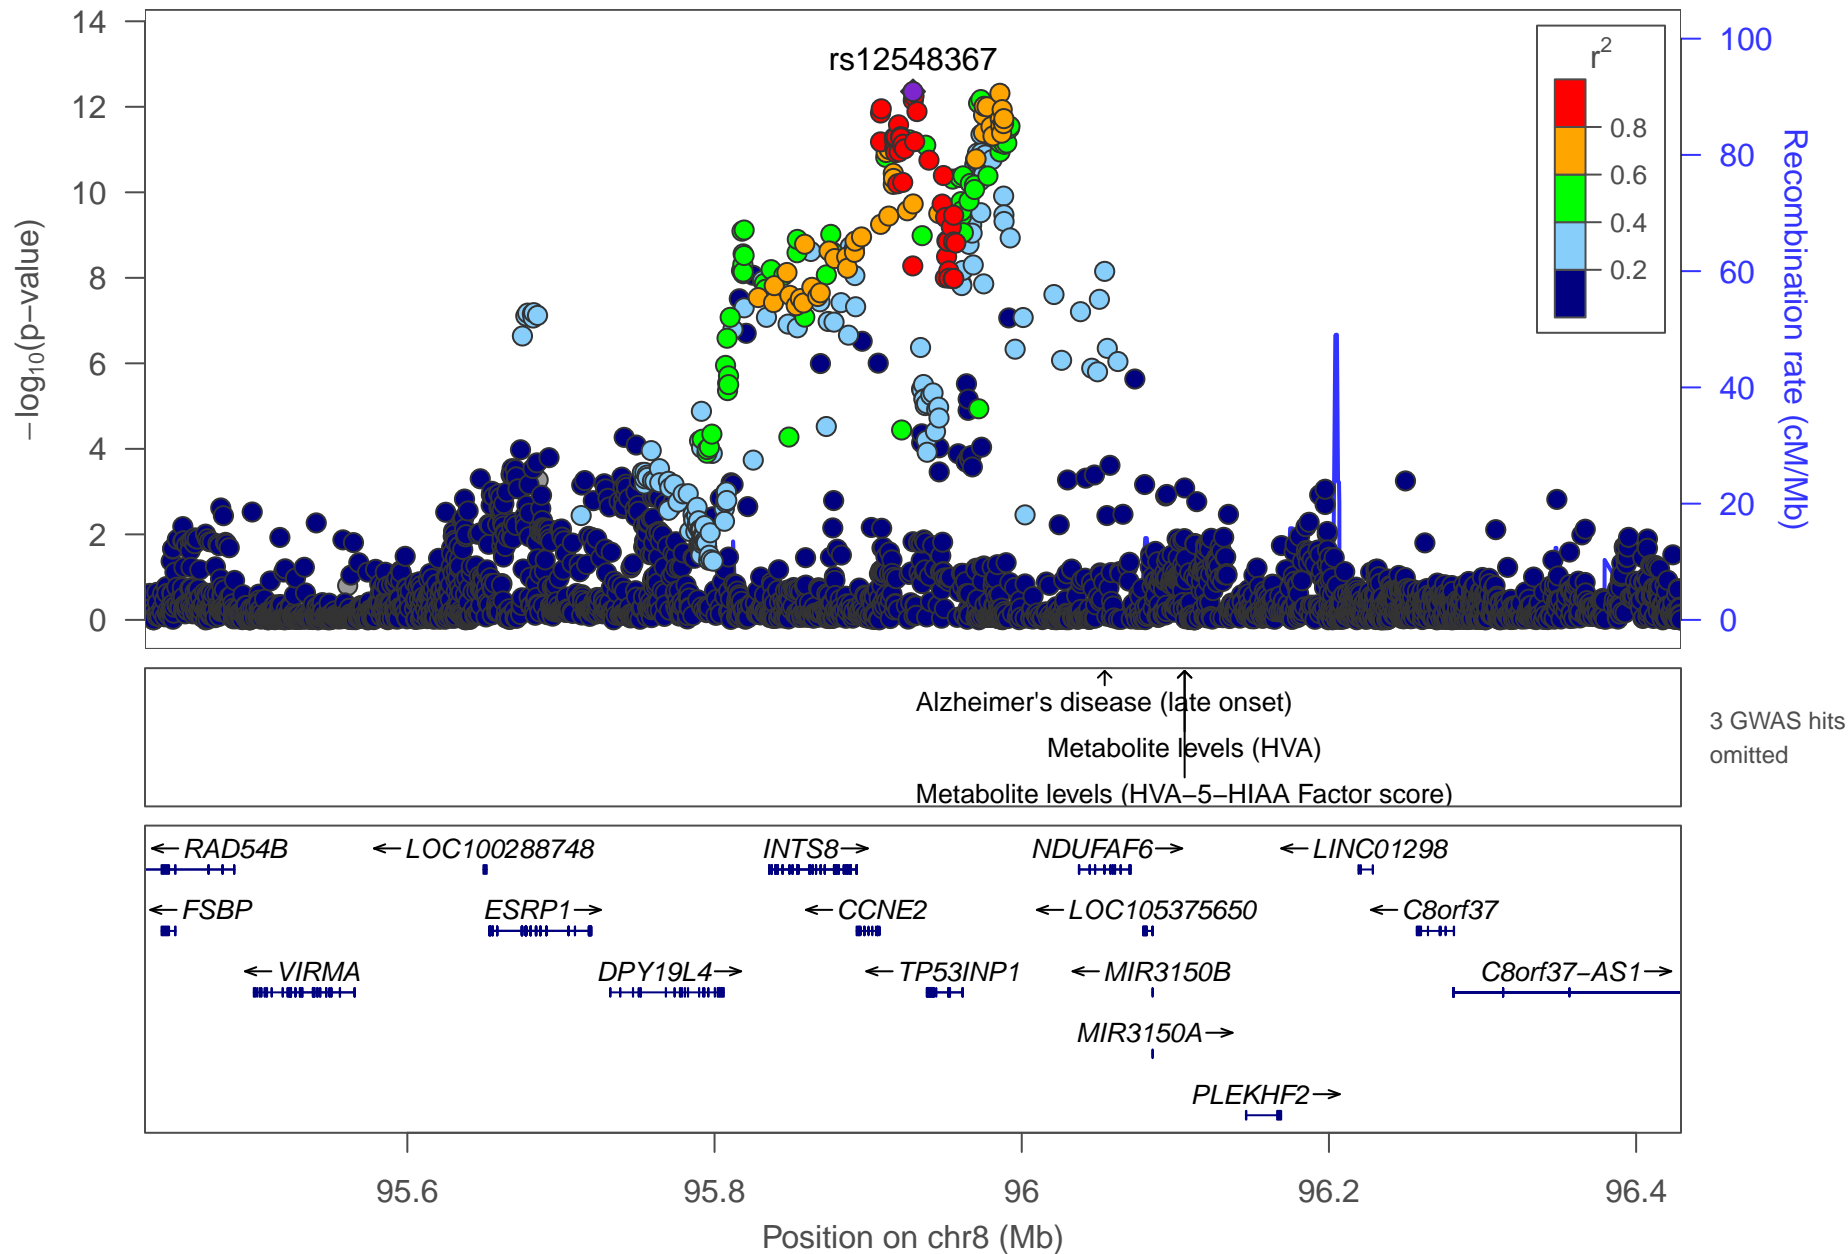

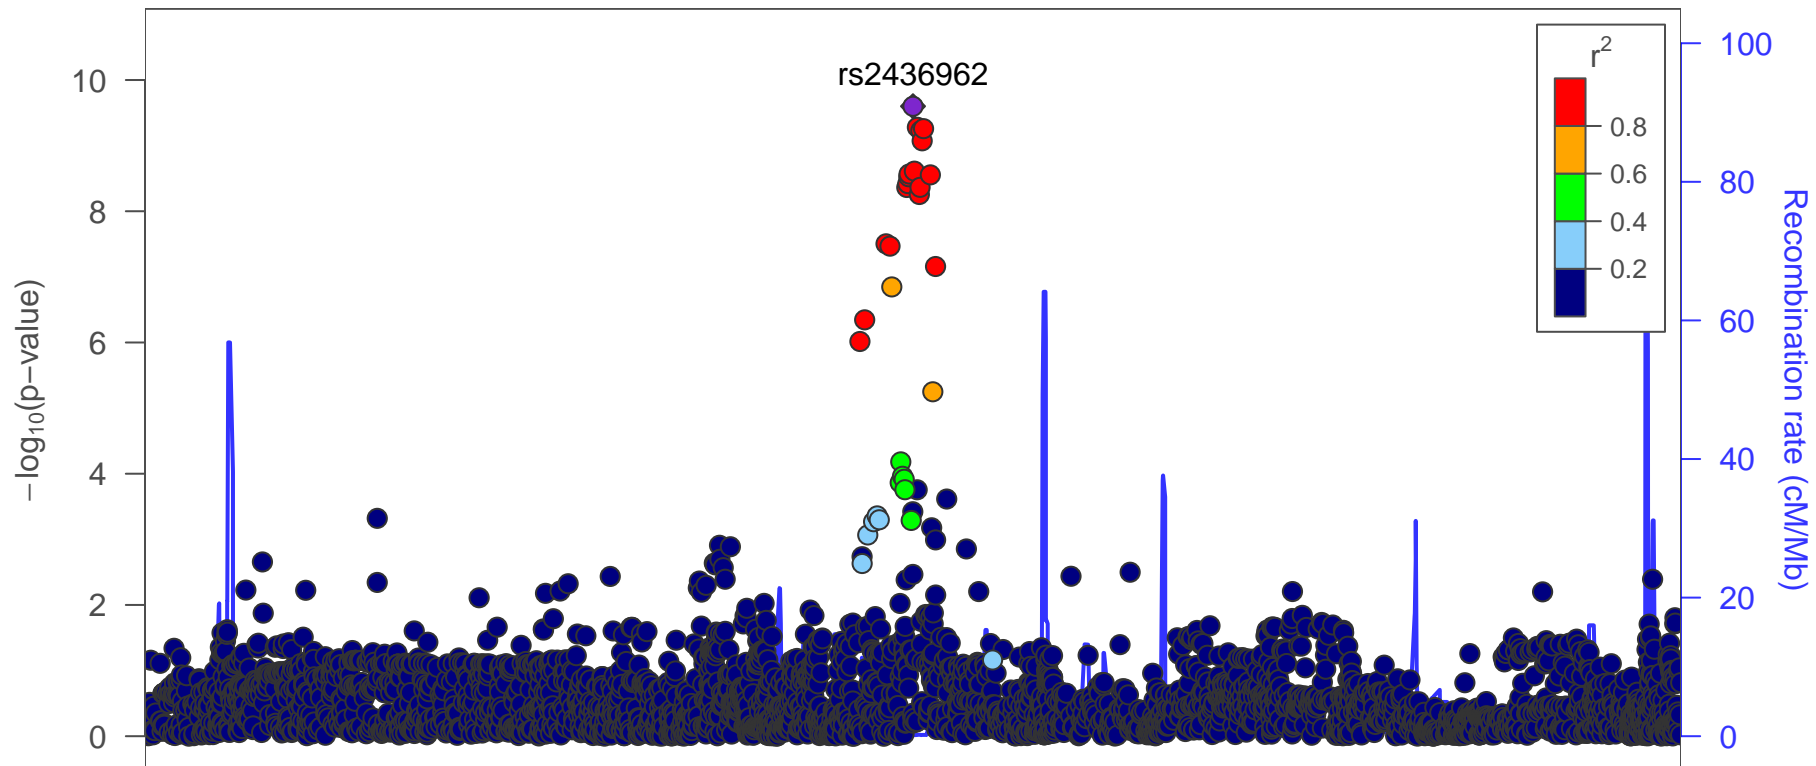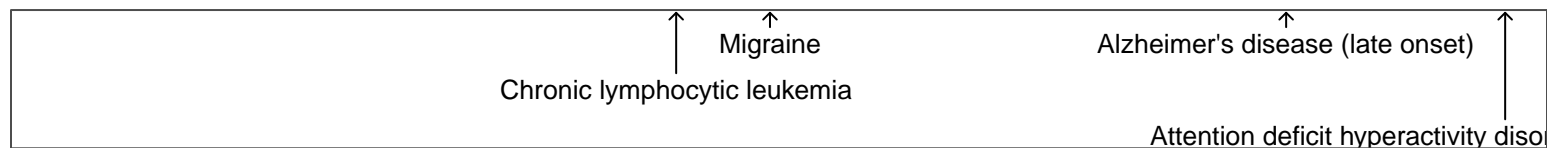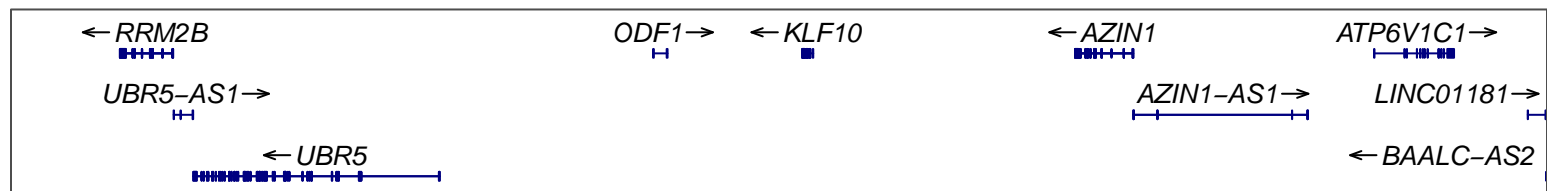

103.2

103.4

103.6

103.8

104

Position on chr8 (Mb)



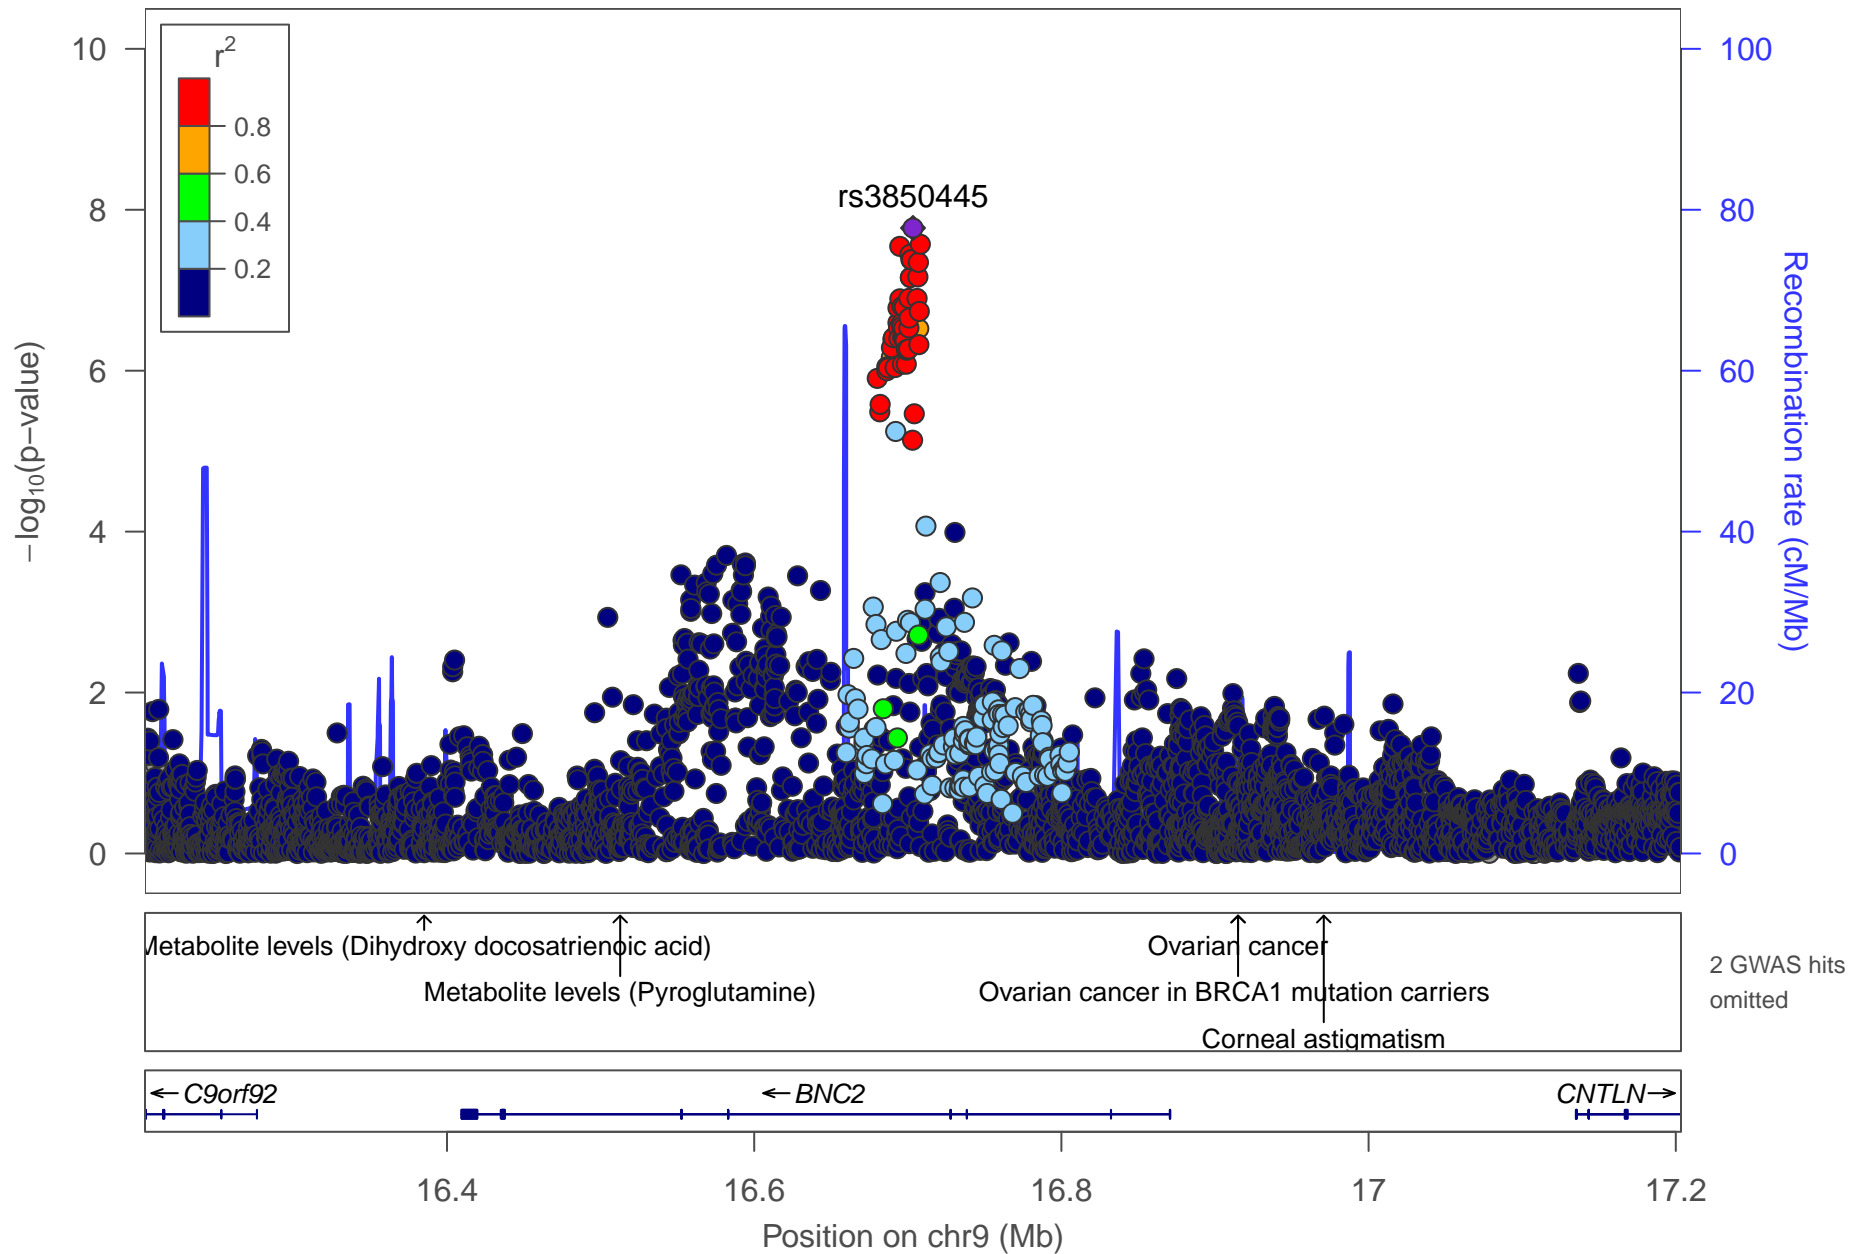

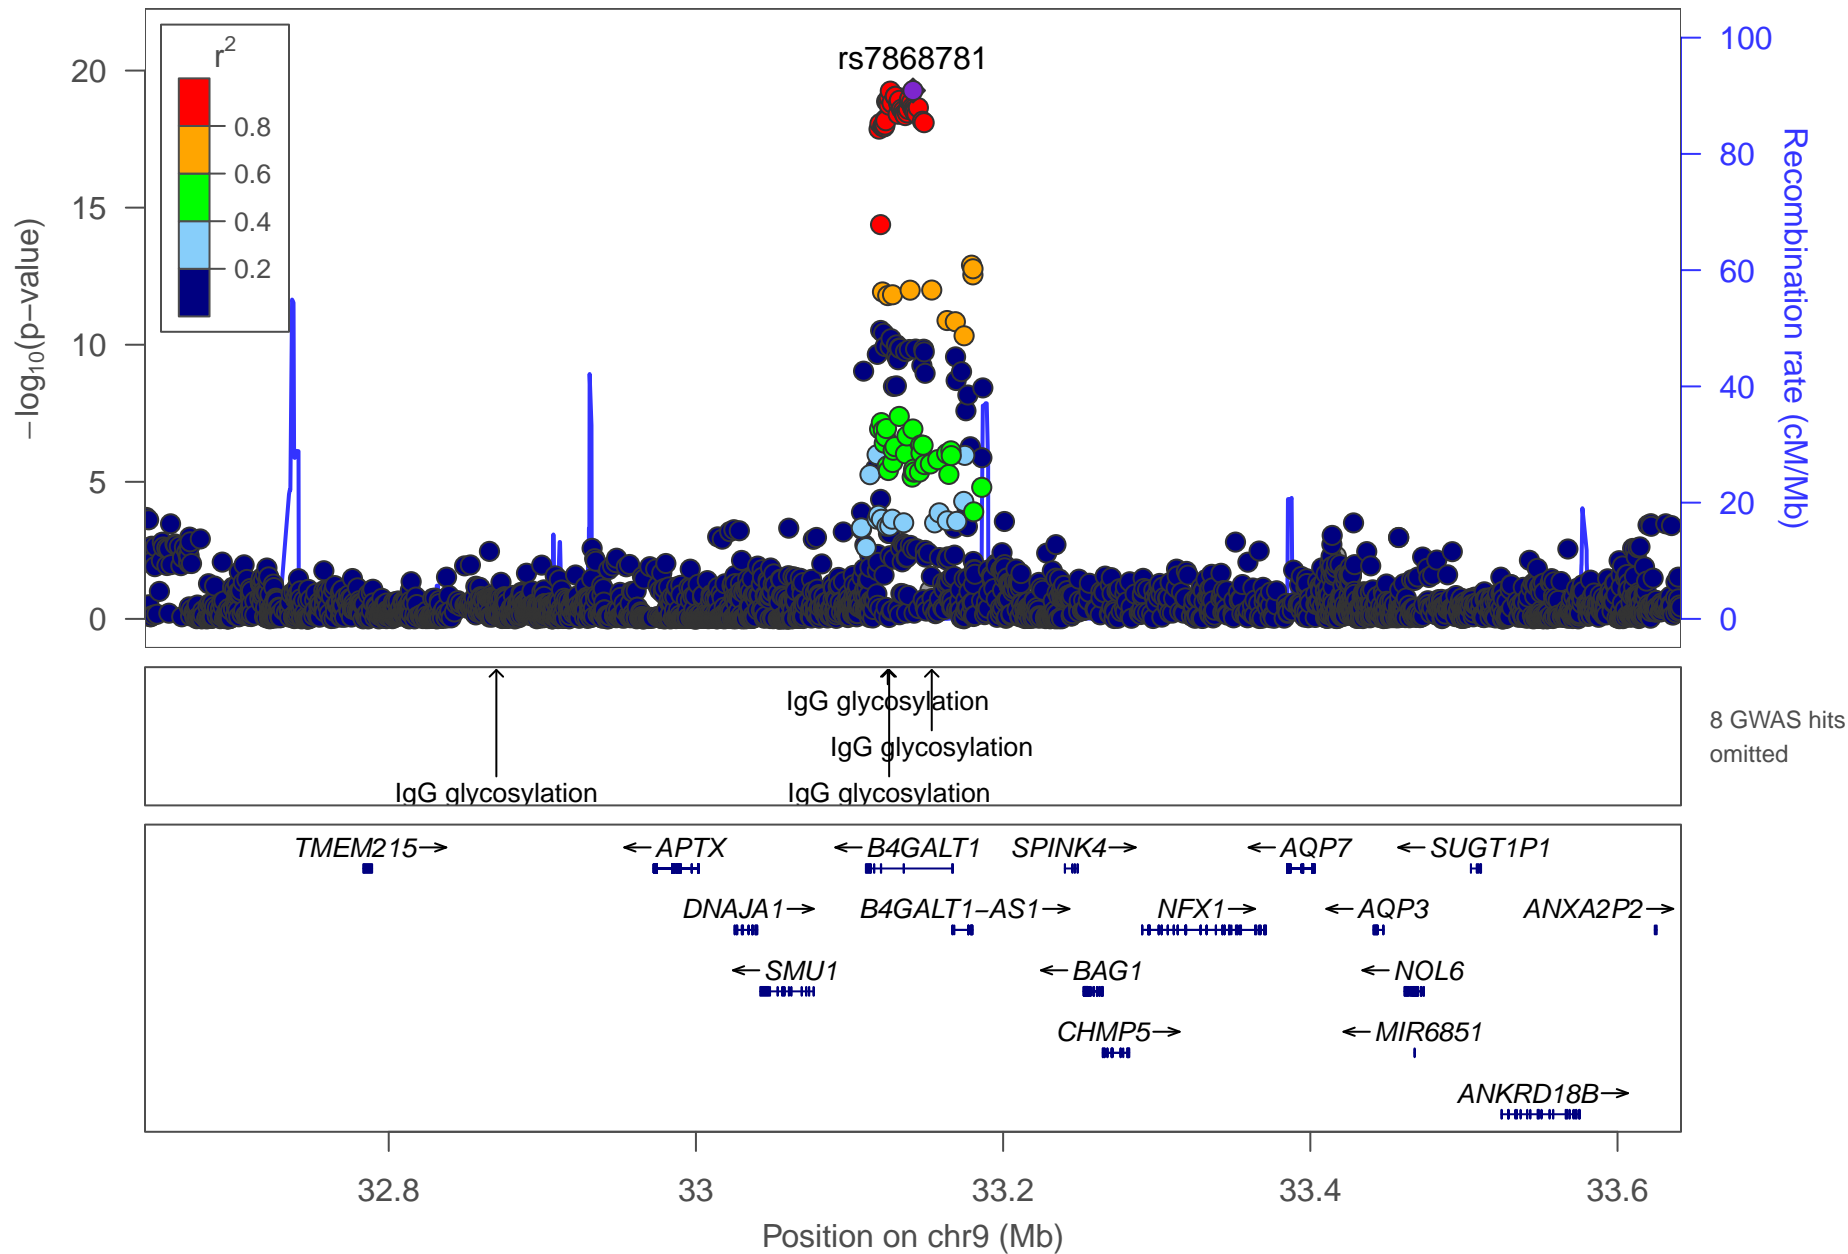

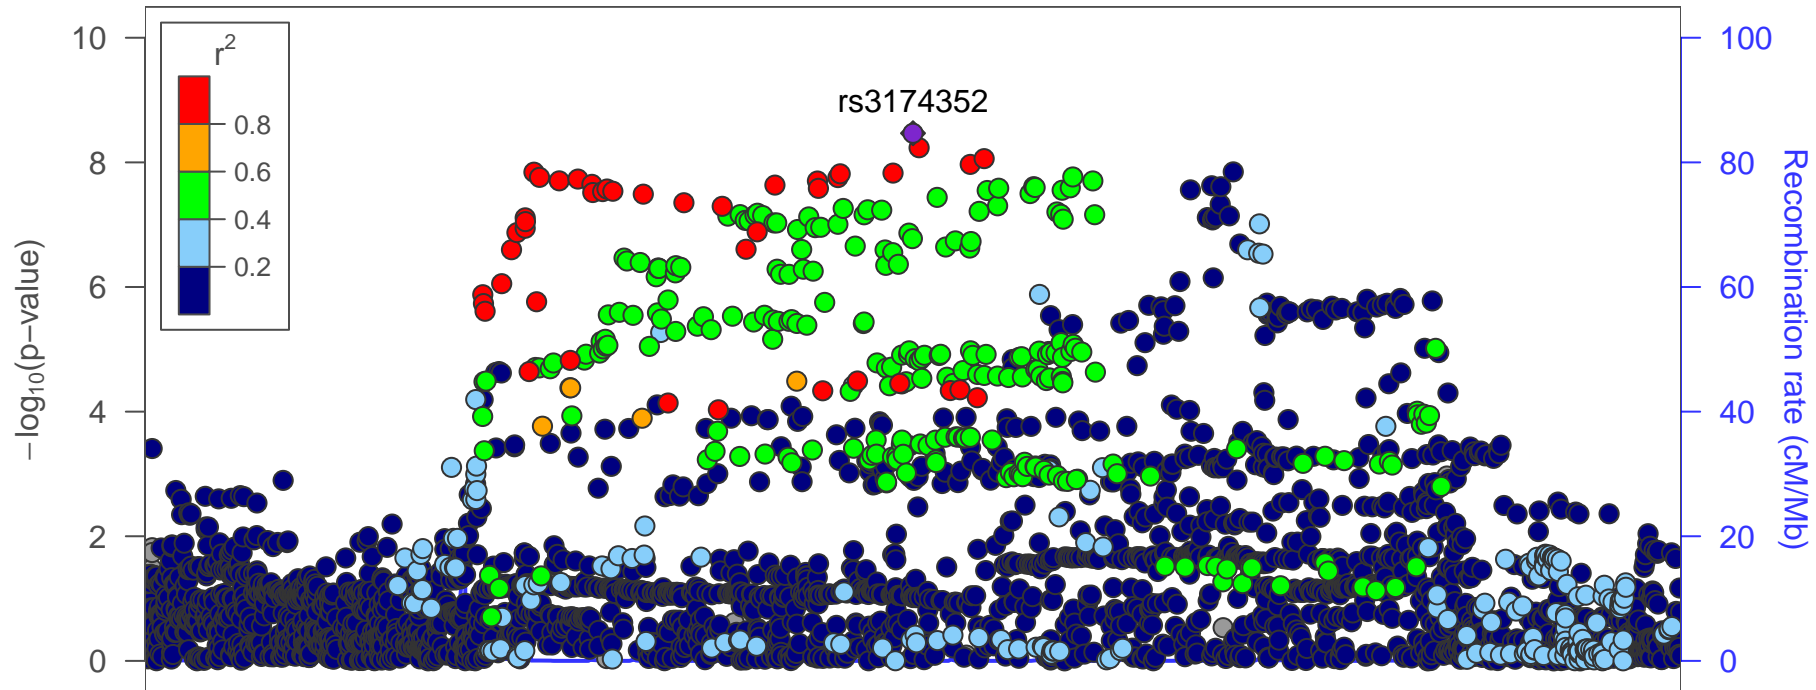

↑  
 bipolar disorder and schizophrenia  
 ↑ ↑  
 Visceral adipose tissue/subcutaneous adipose tissue  
 ↑  
 Height

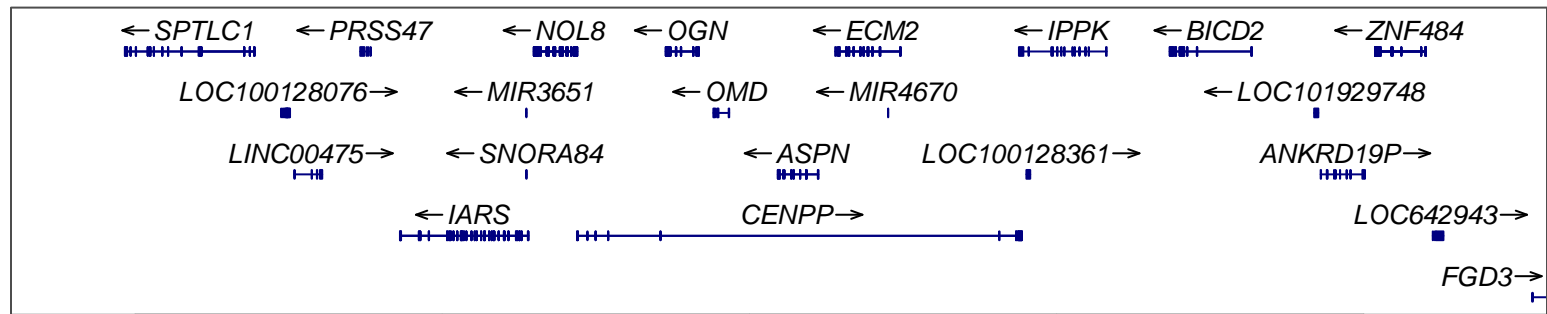

94.8                      95                      95.2                      95.4                      95.6

Position on chr9 (Mb)

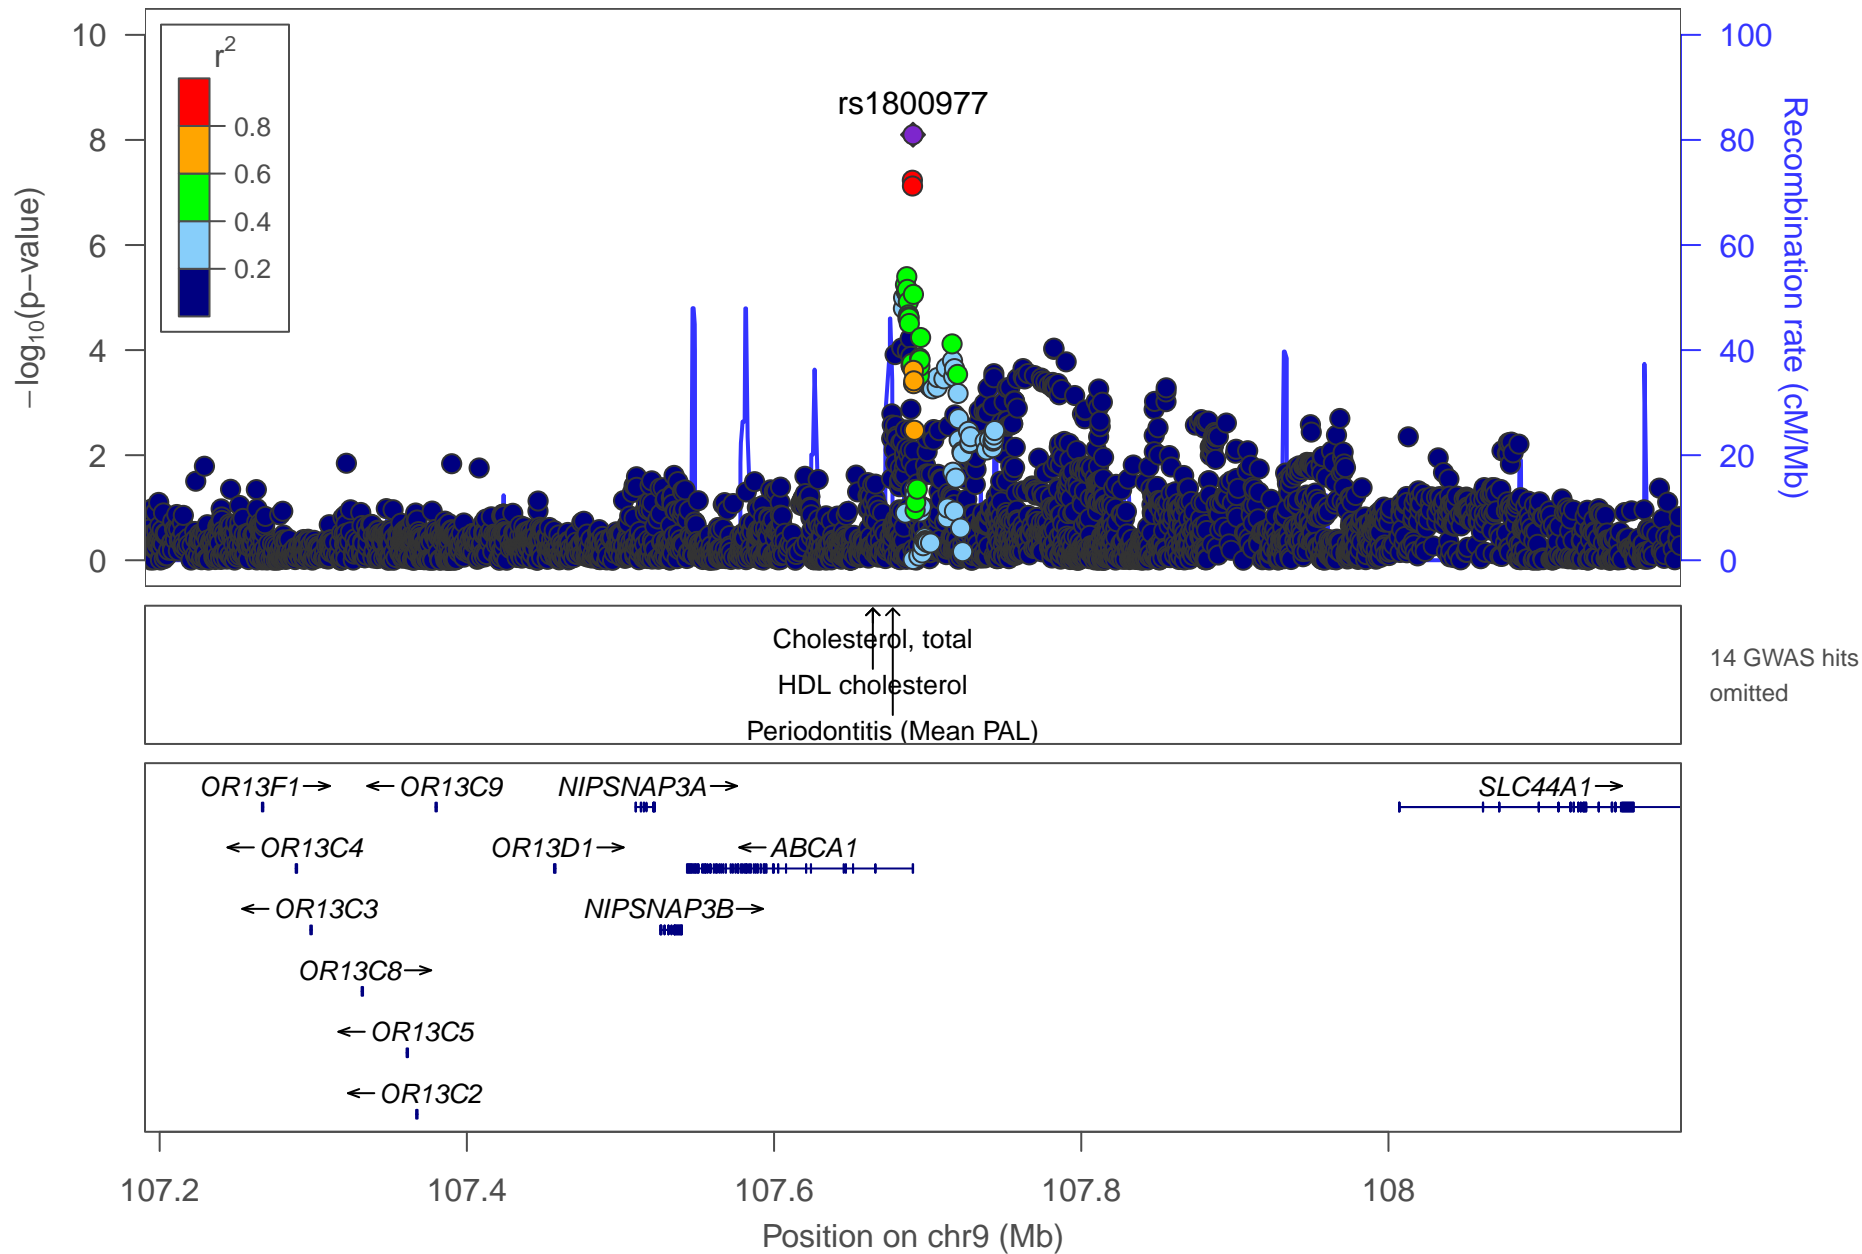

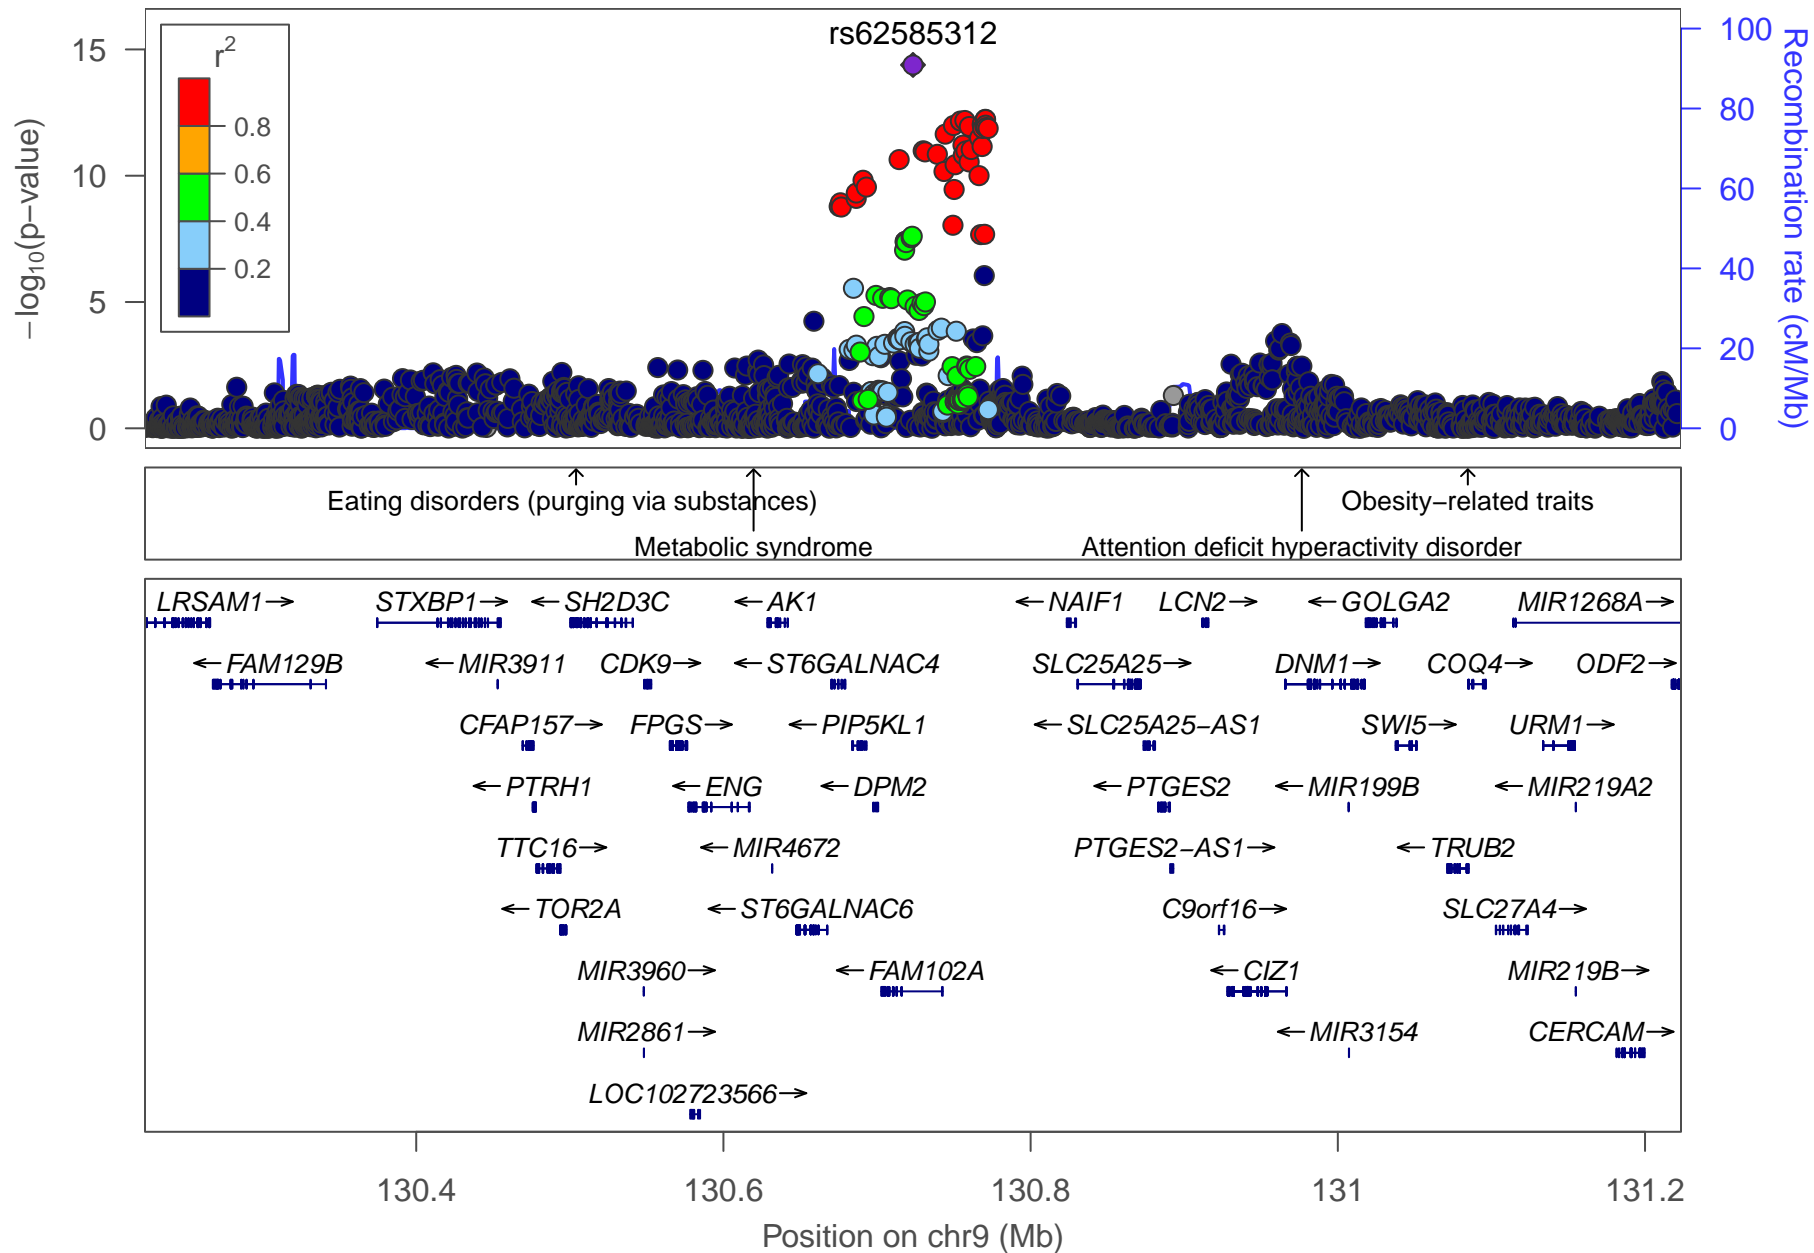

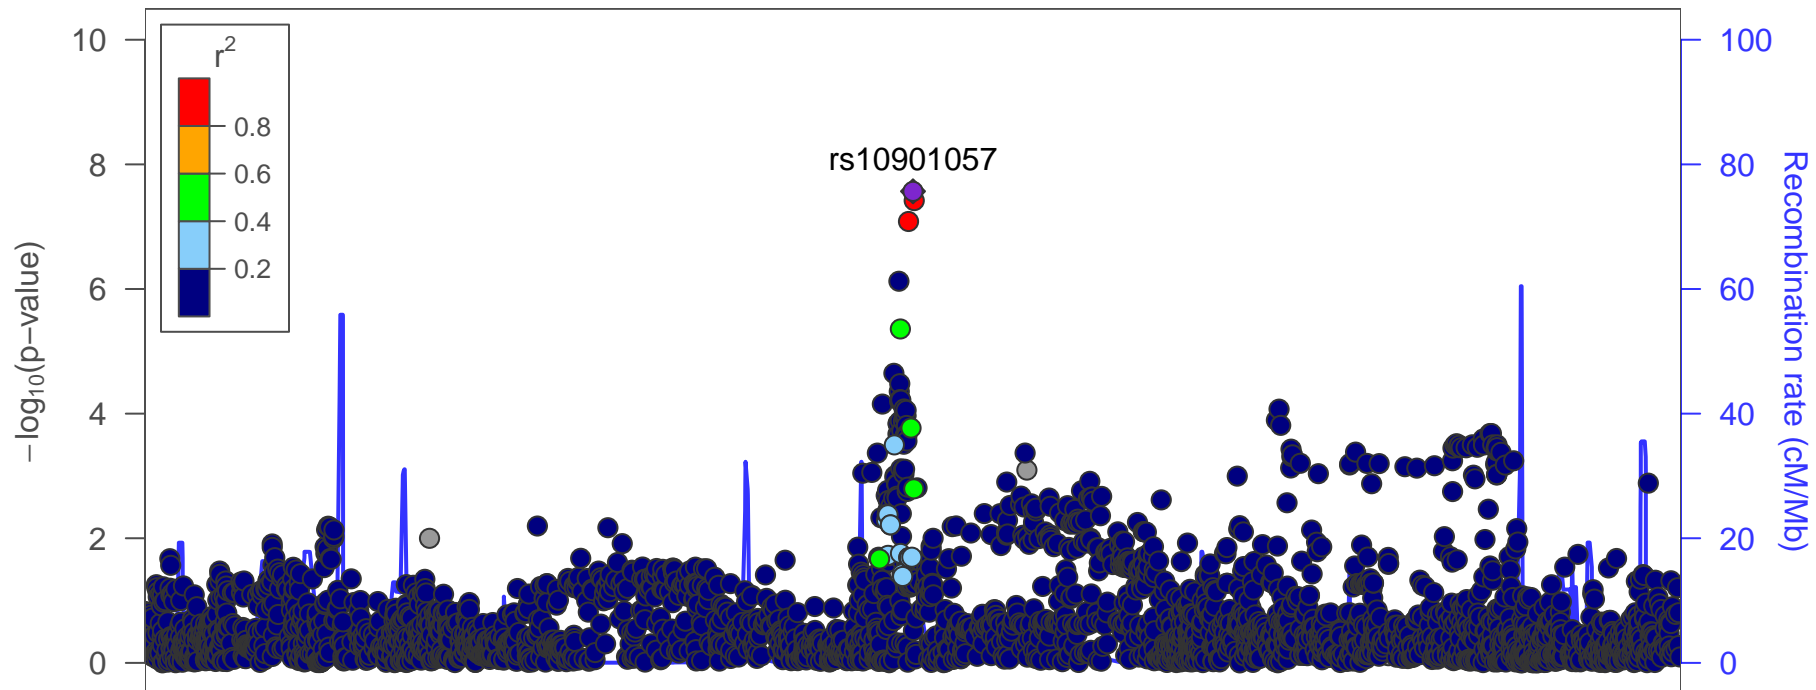

↑ amphetamines  
 ↑ bin levels  
 Response to amphetamines

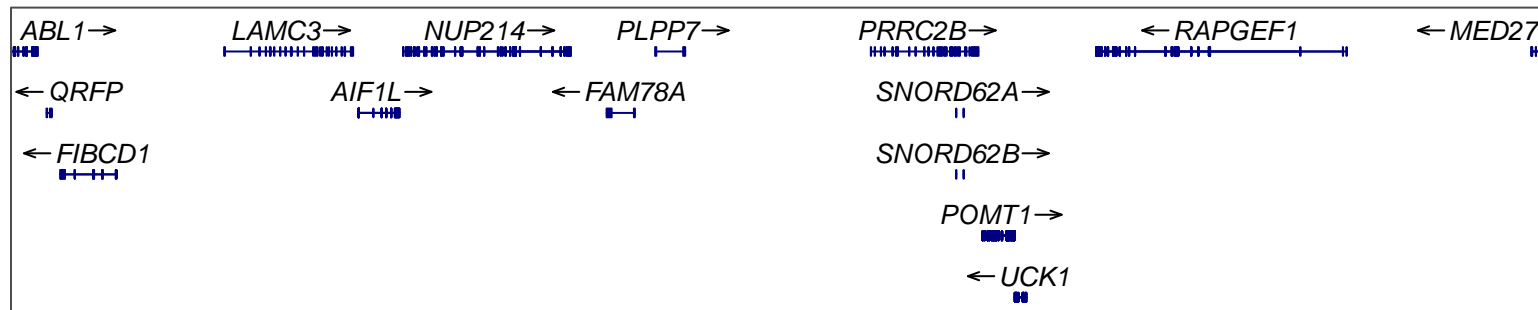

133.8                      134                      134.2                      134.4                      134.6  
 Position on chr9 (Mb)

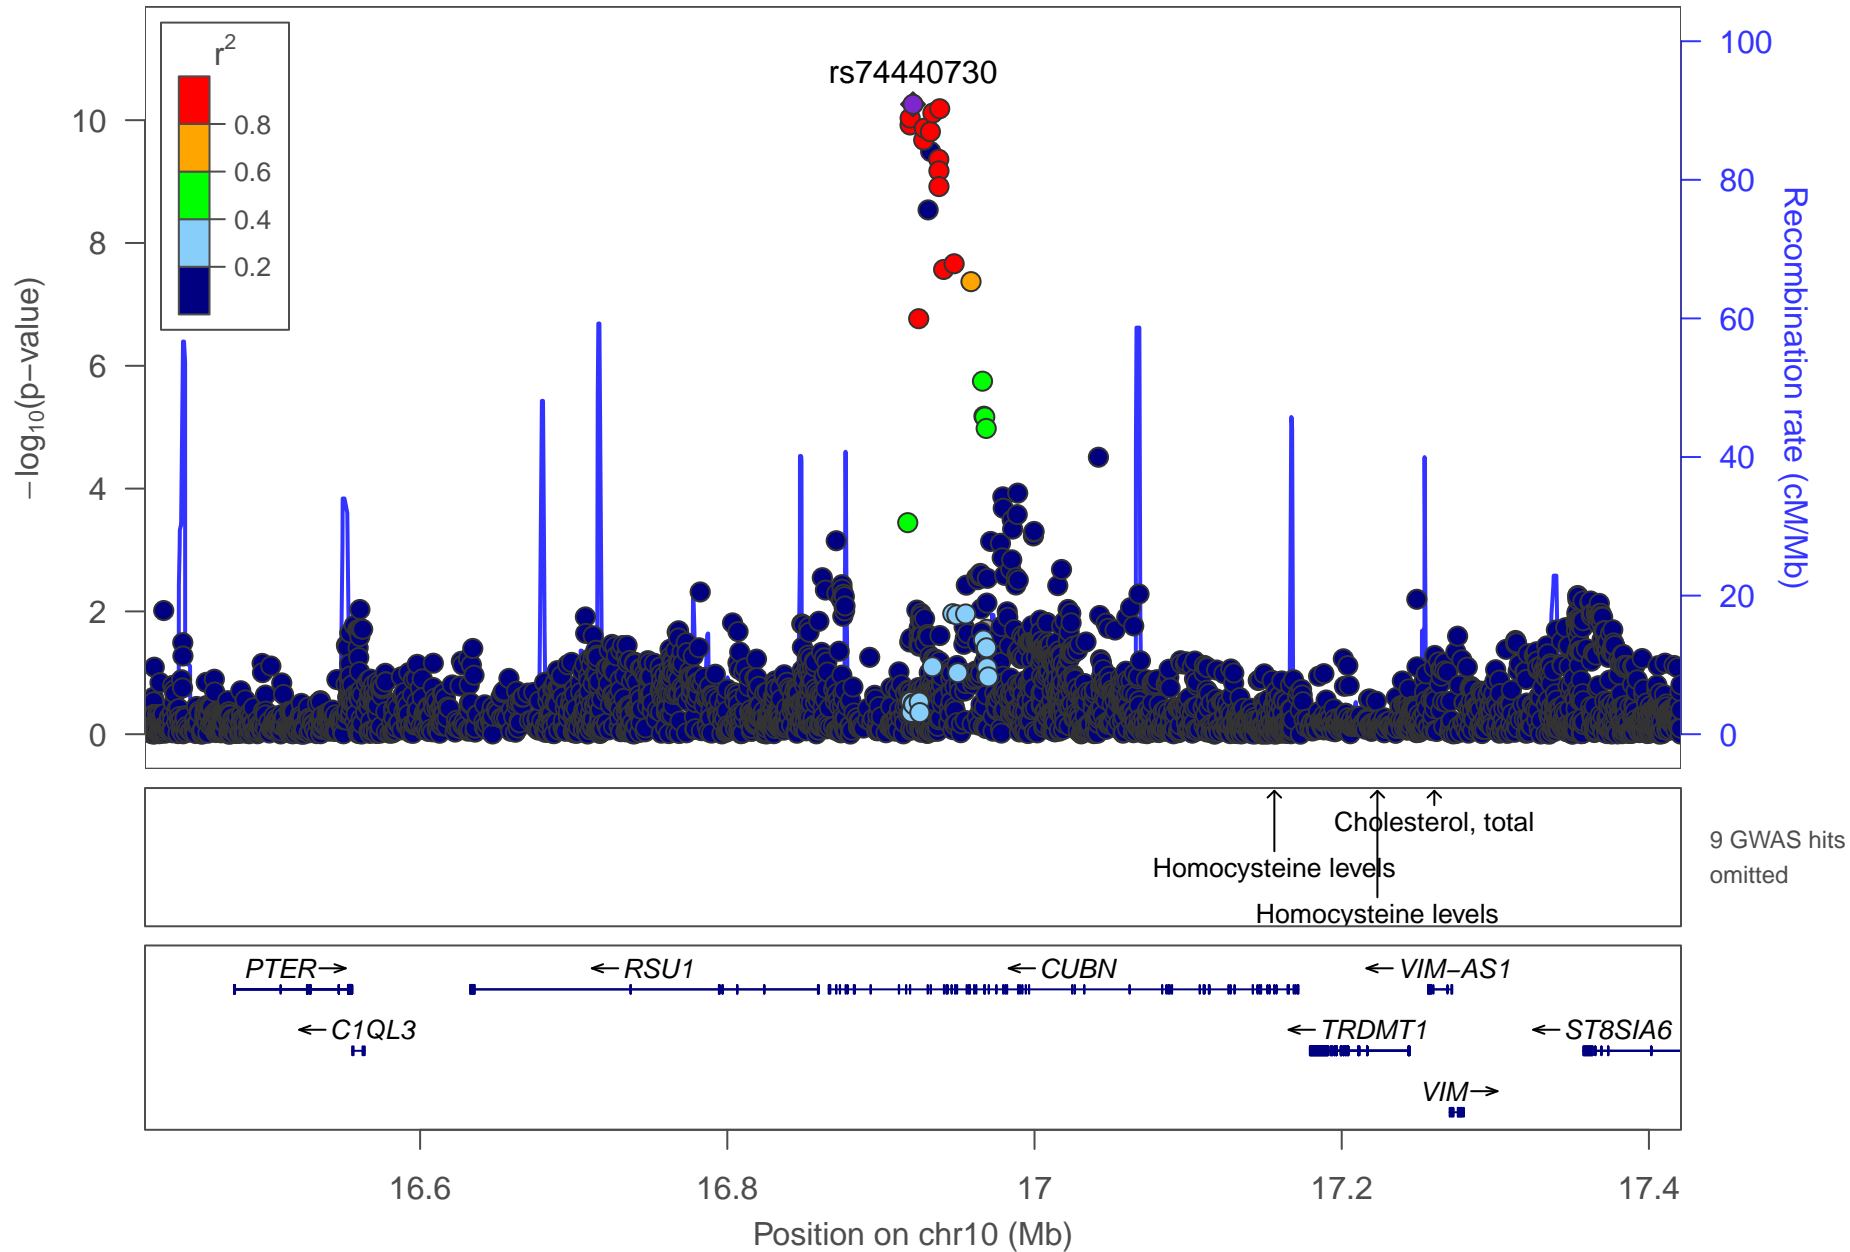

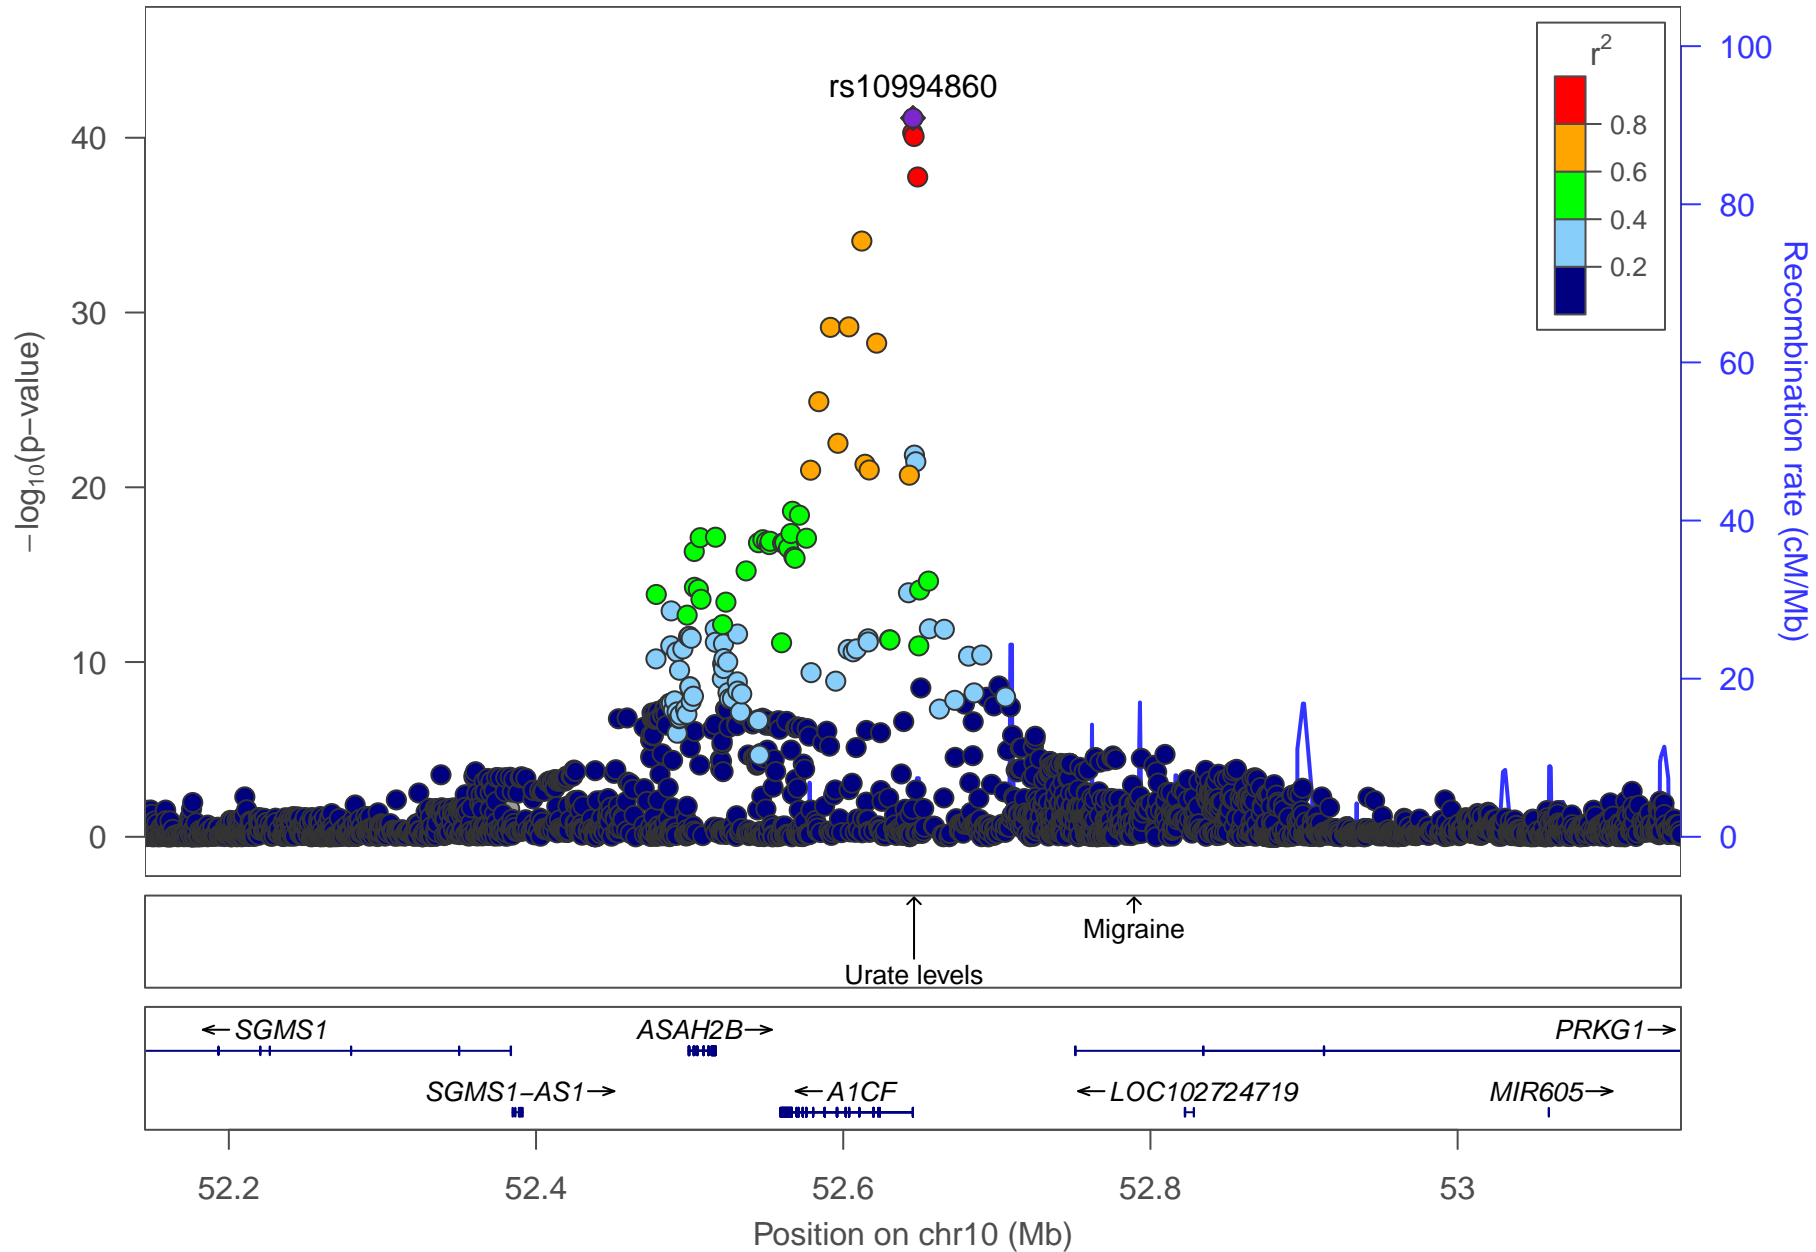



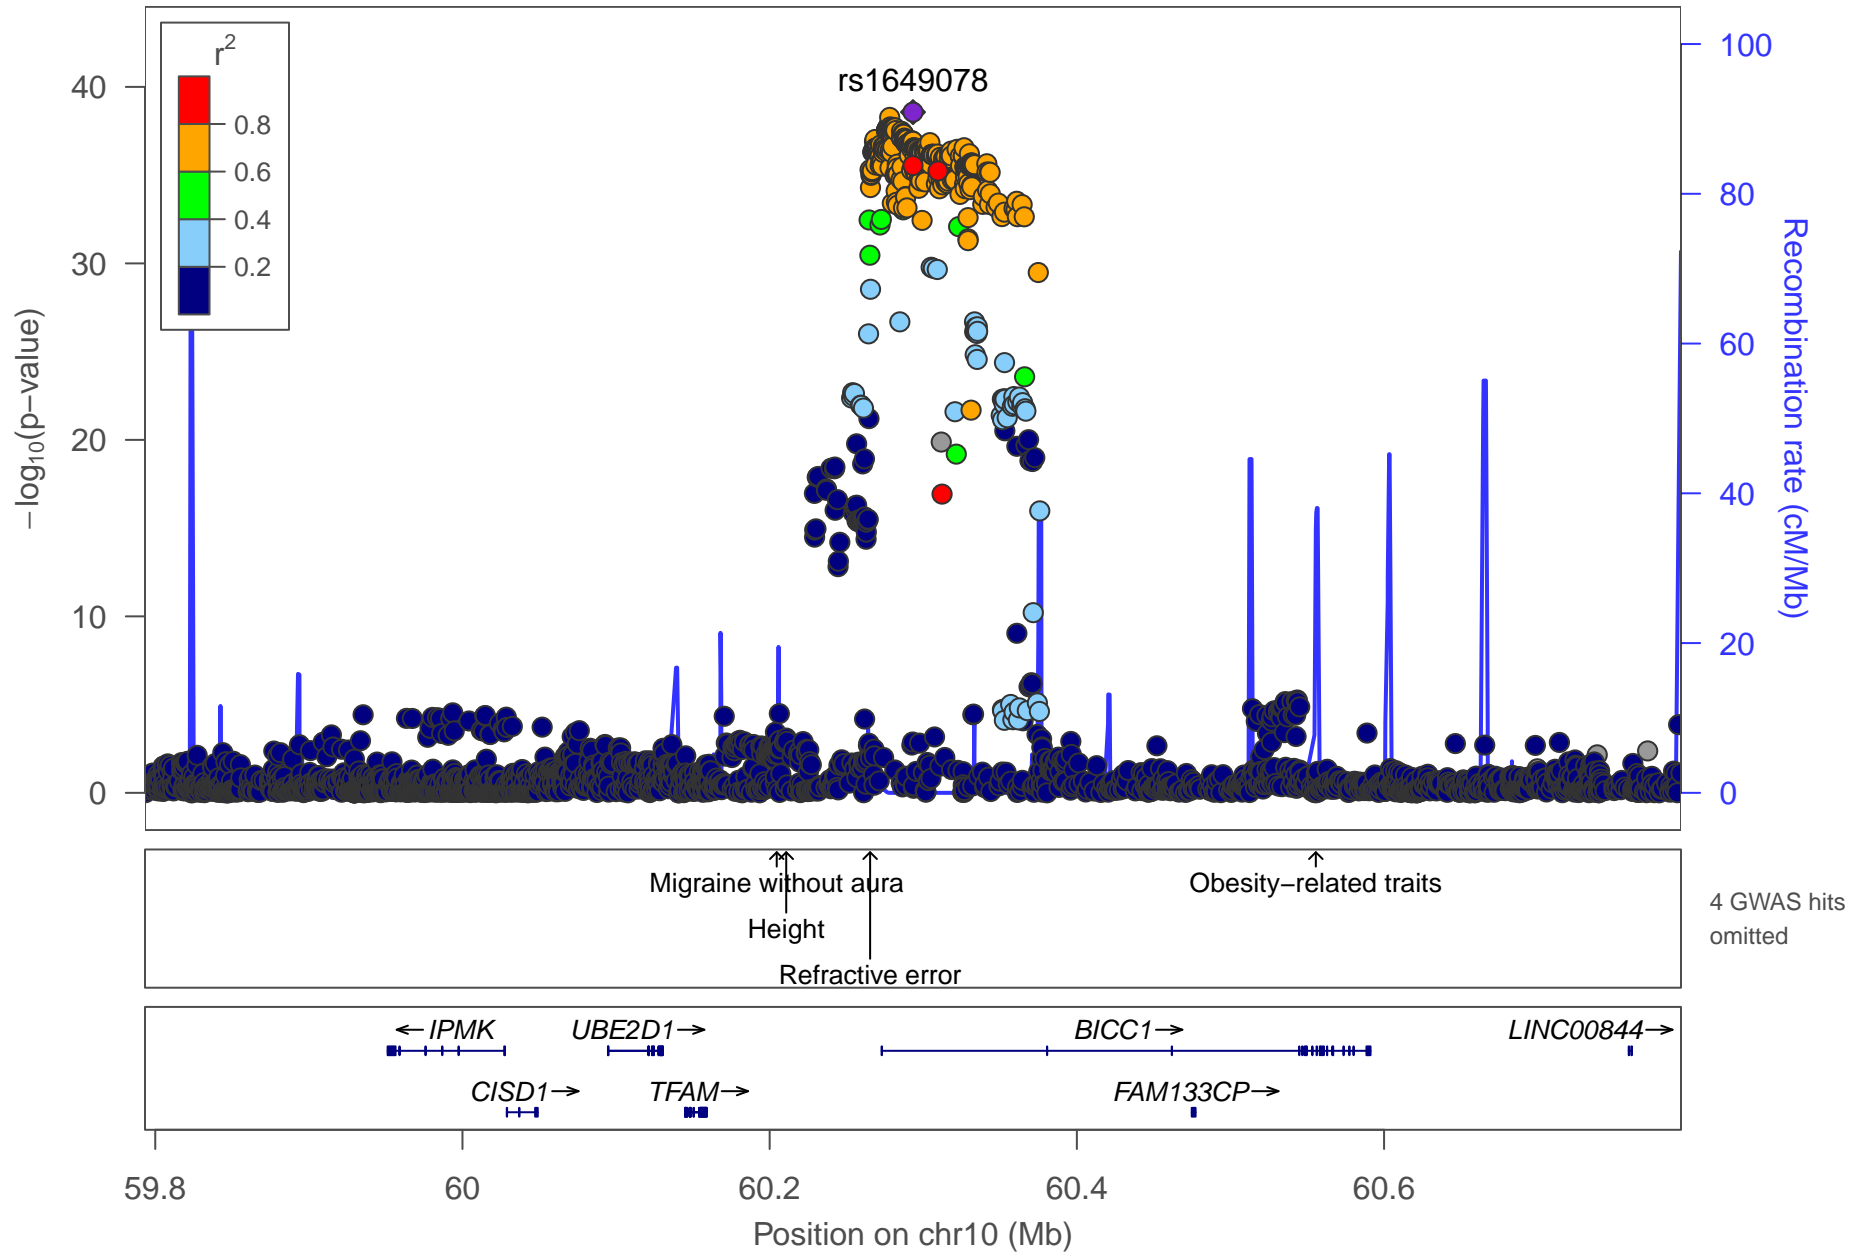

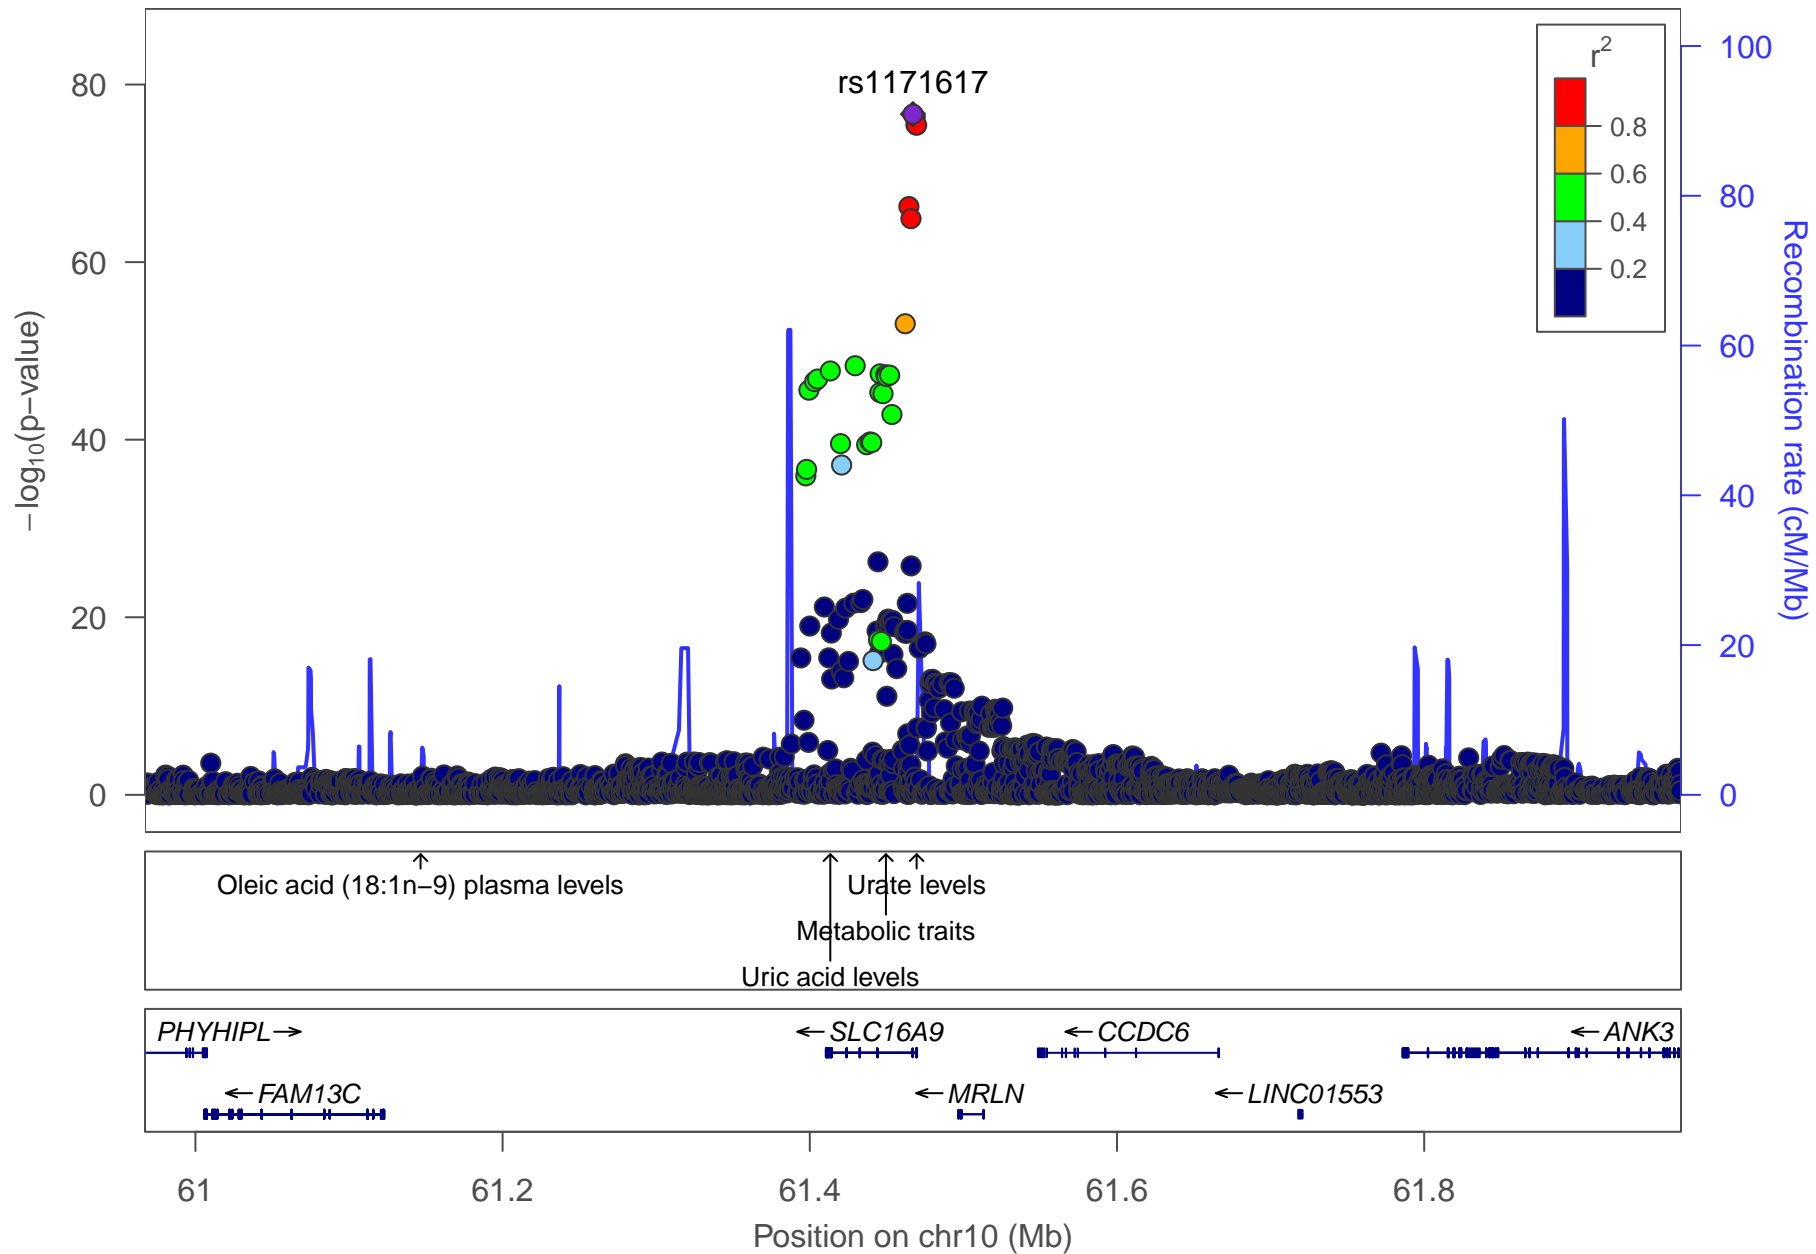

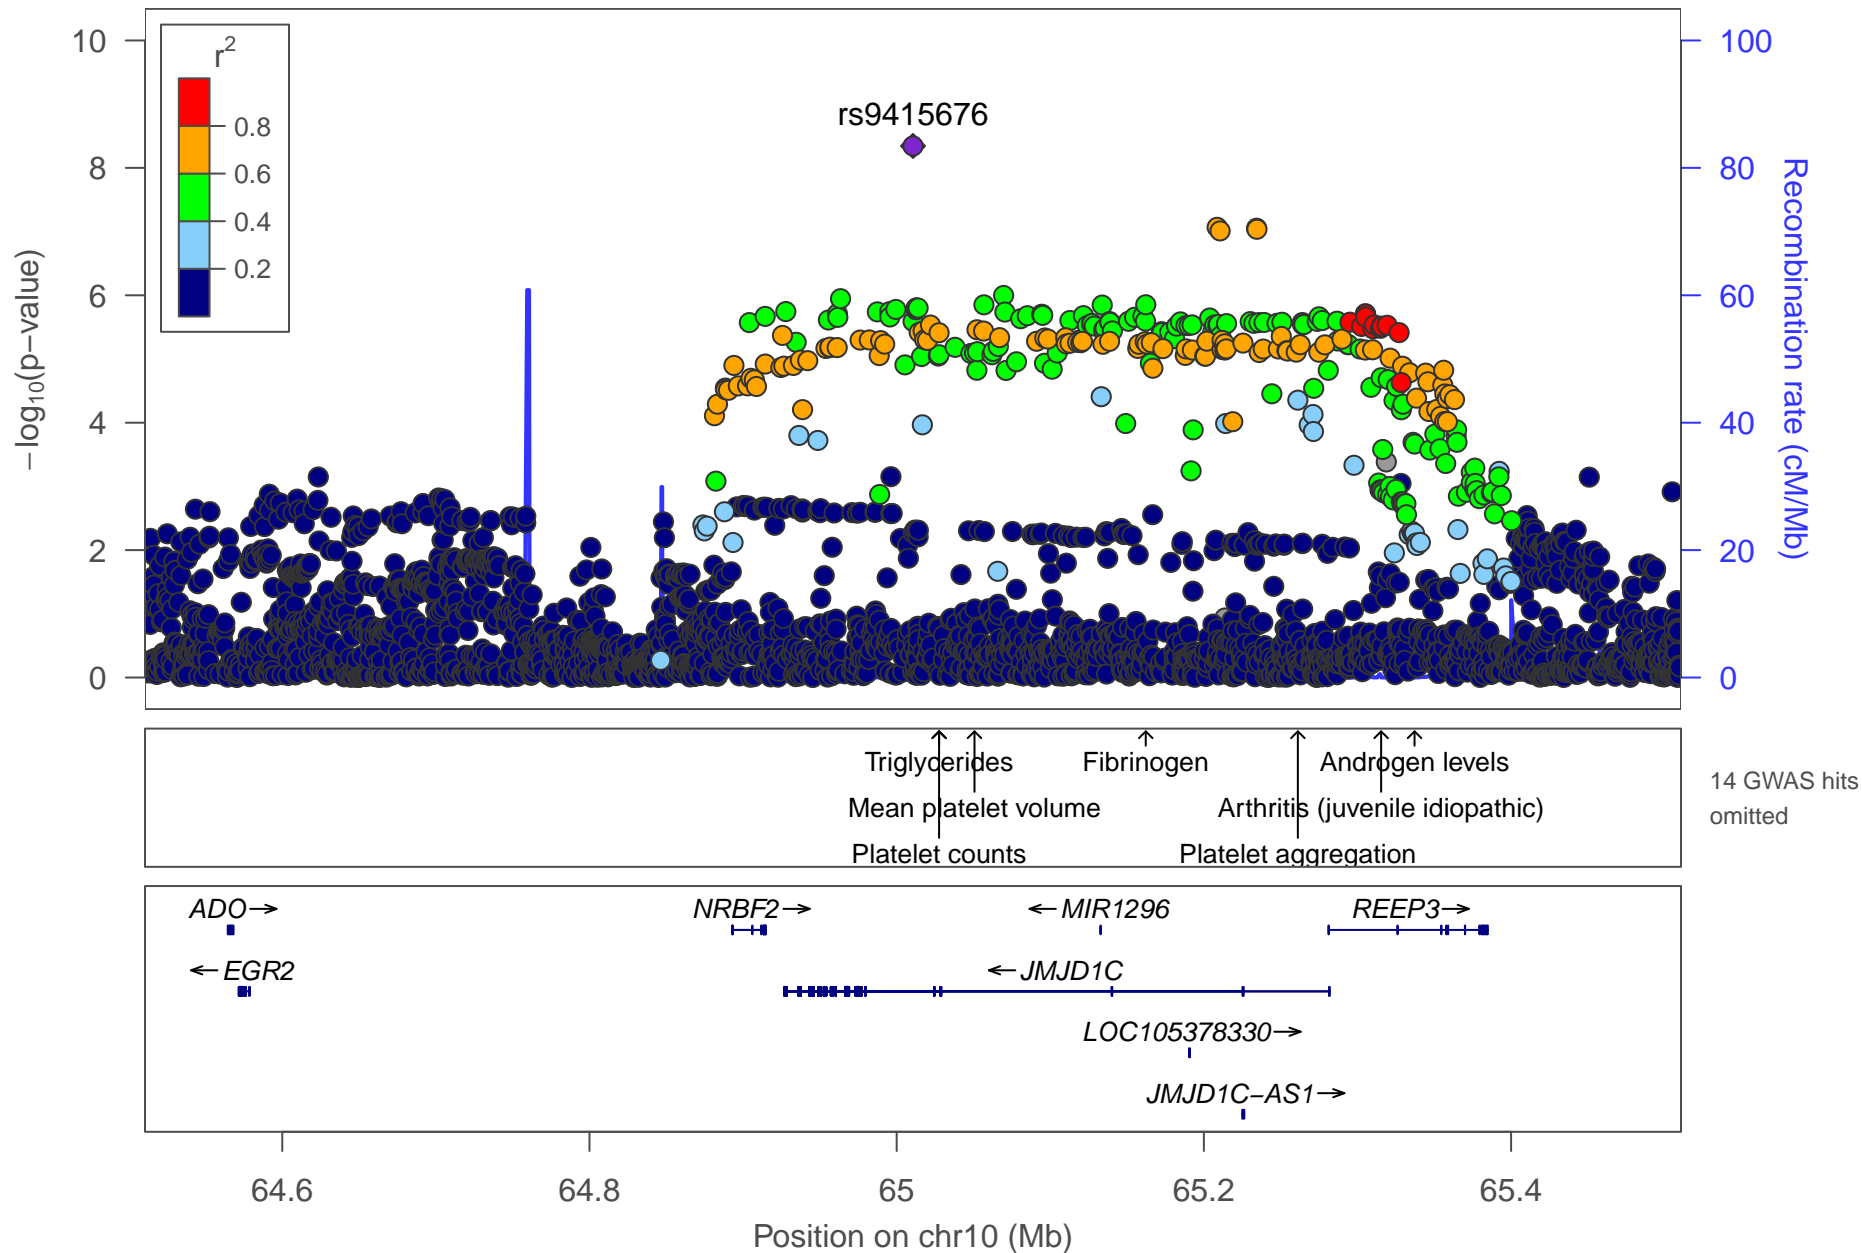

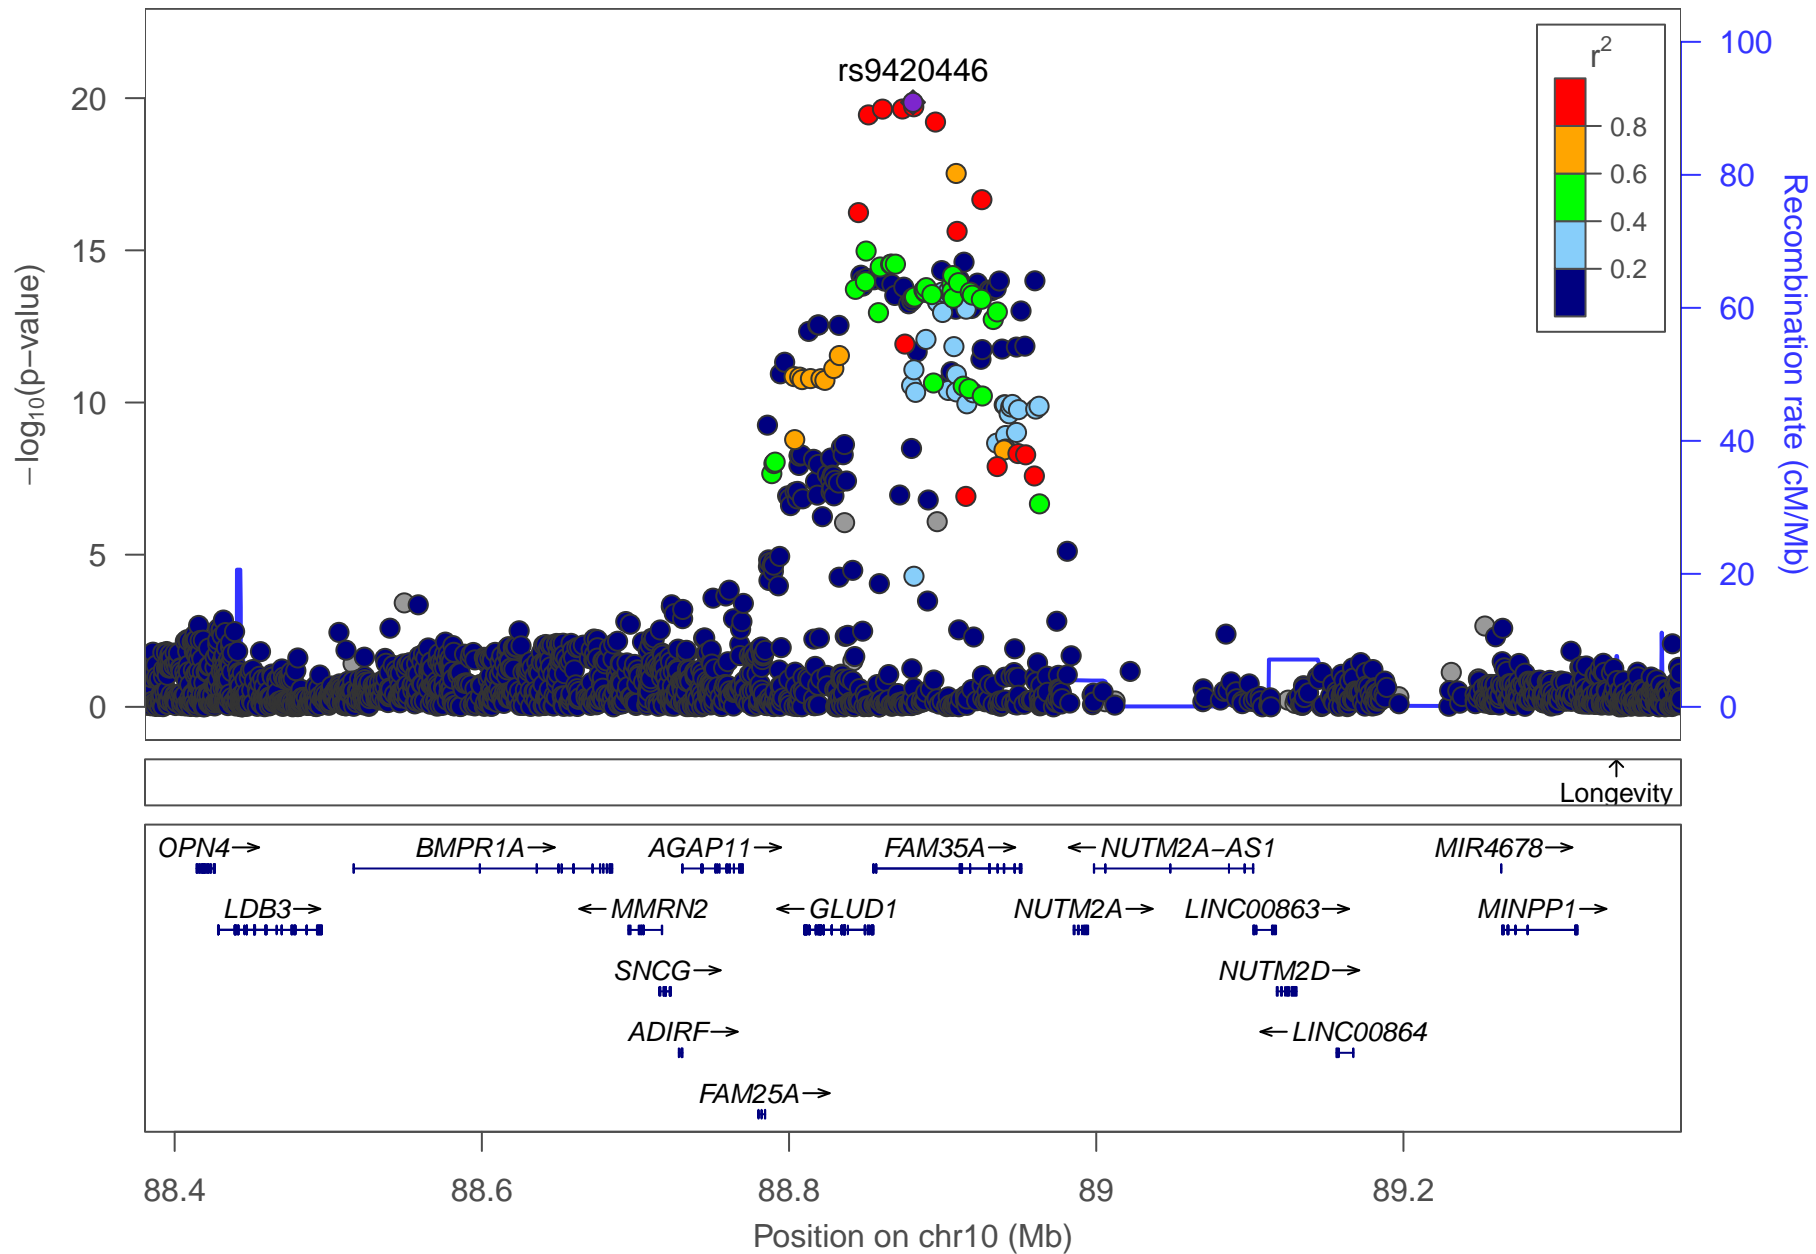

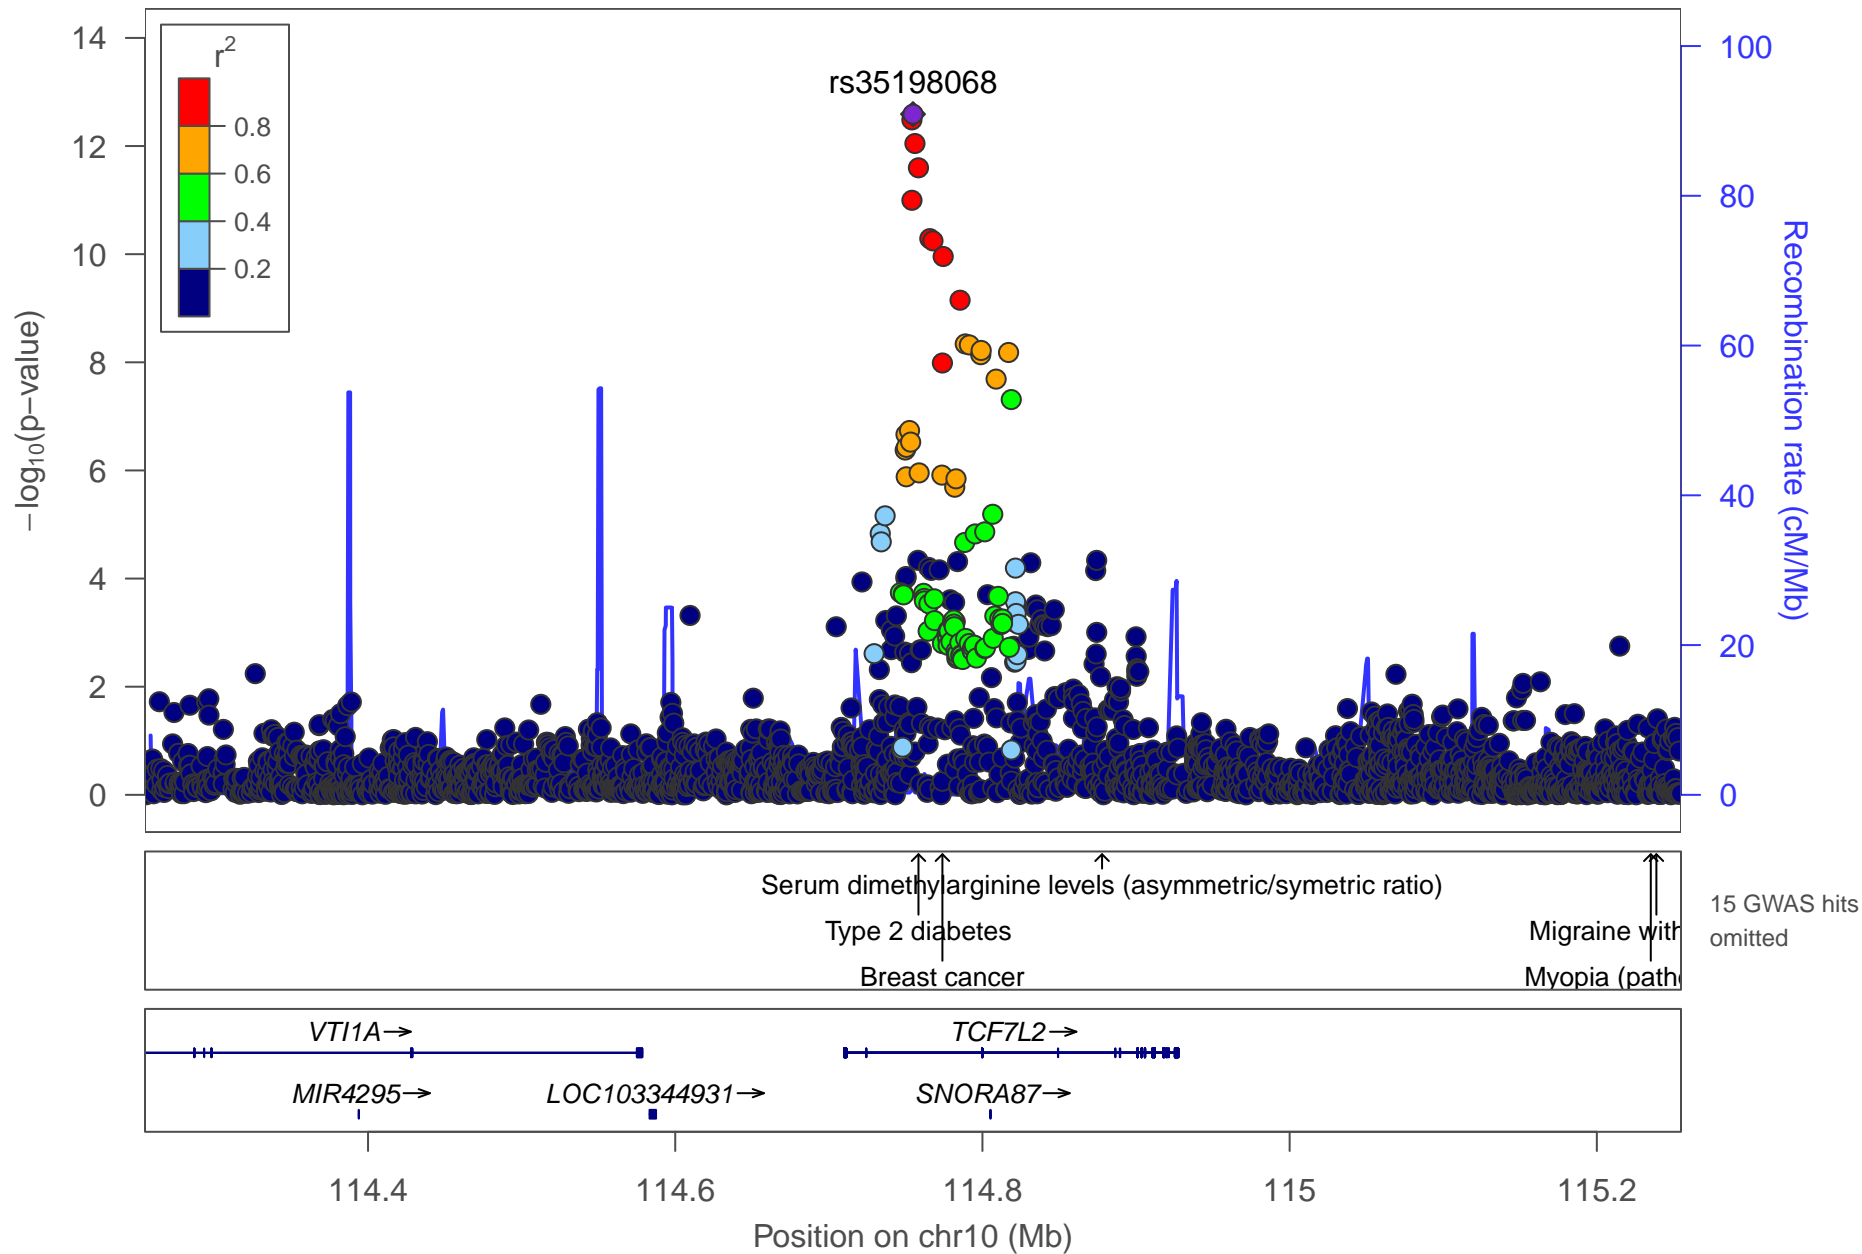

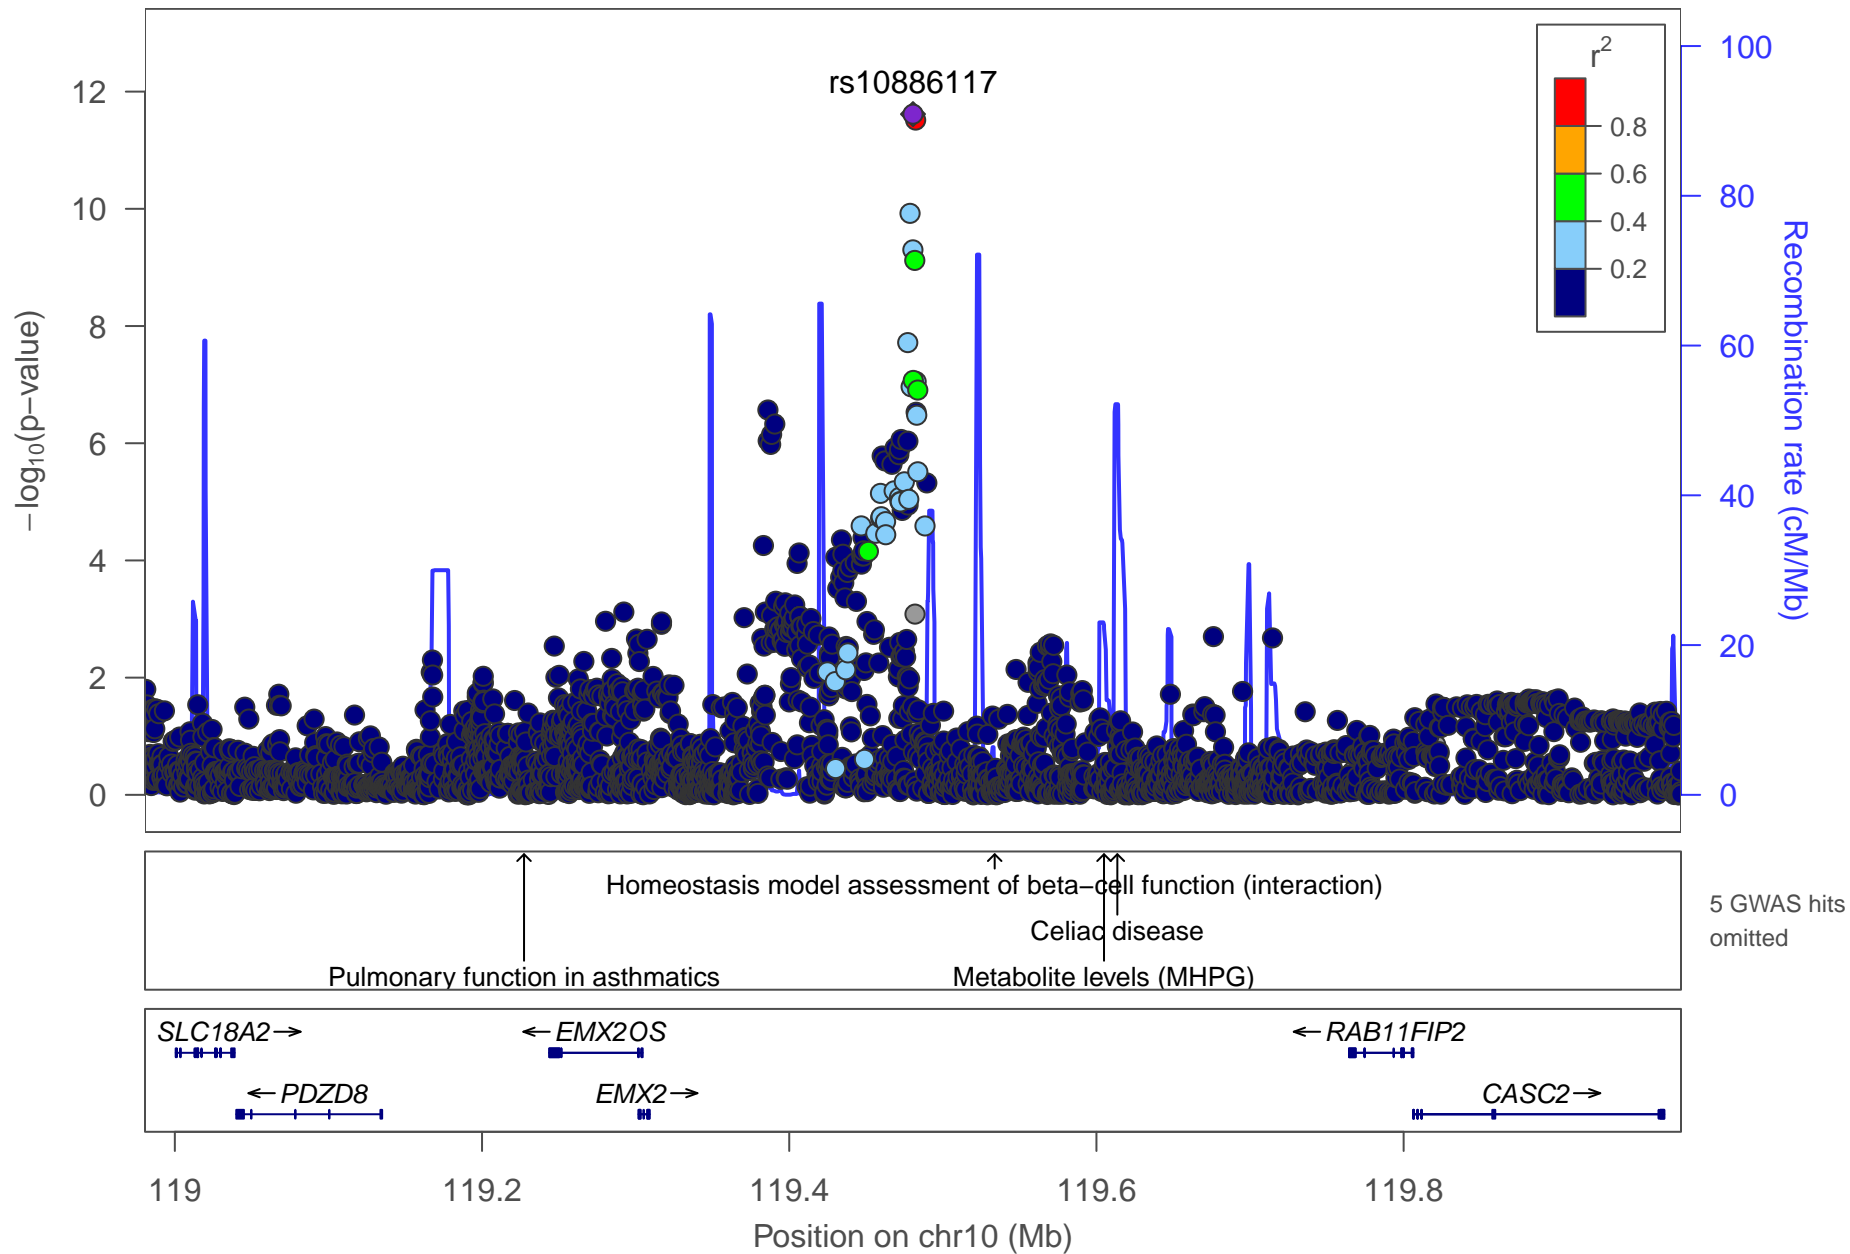

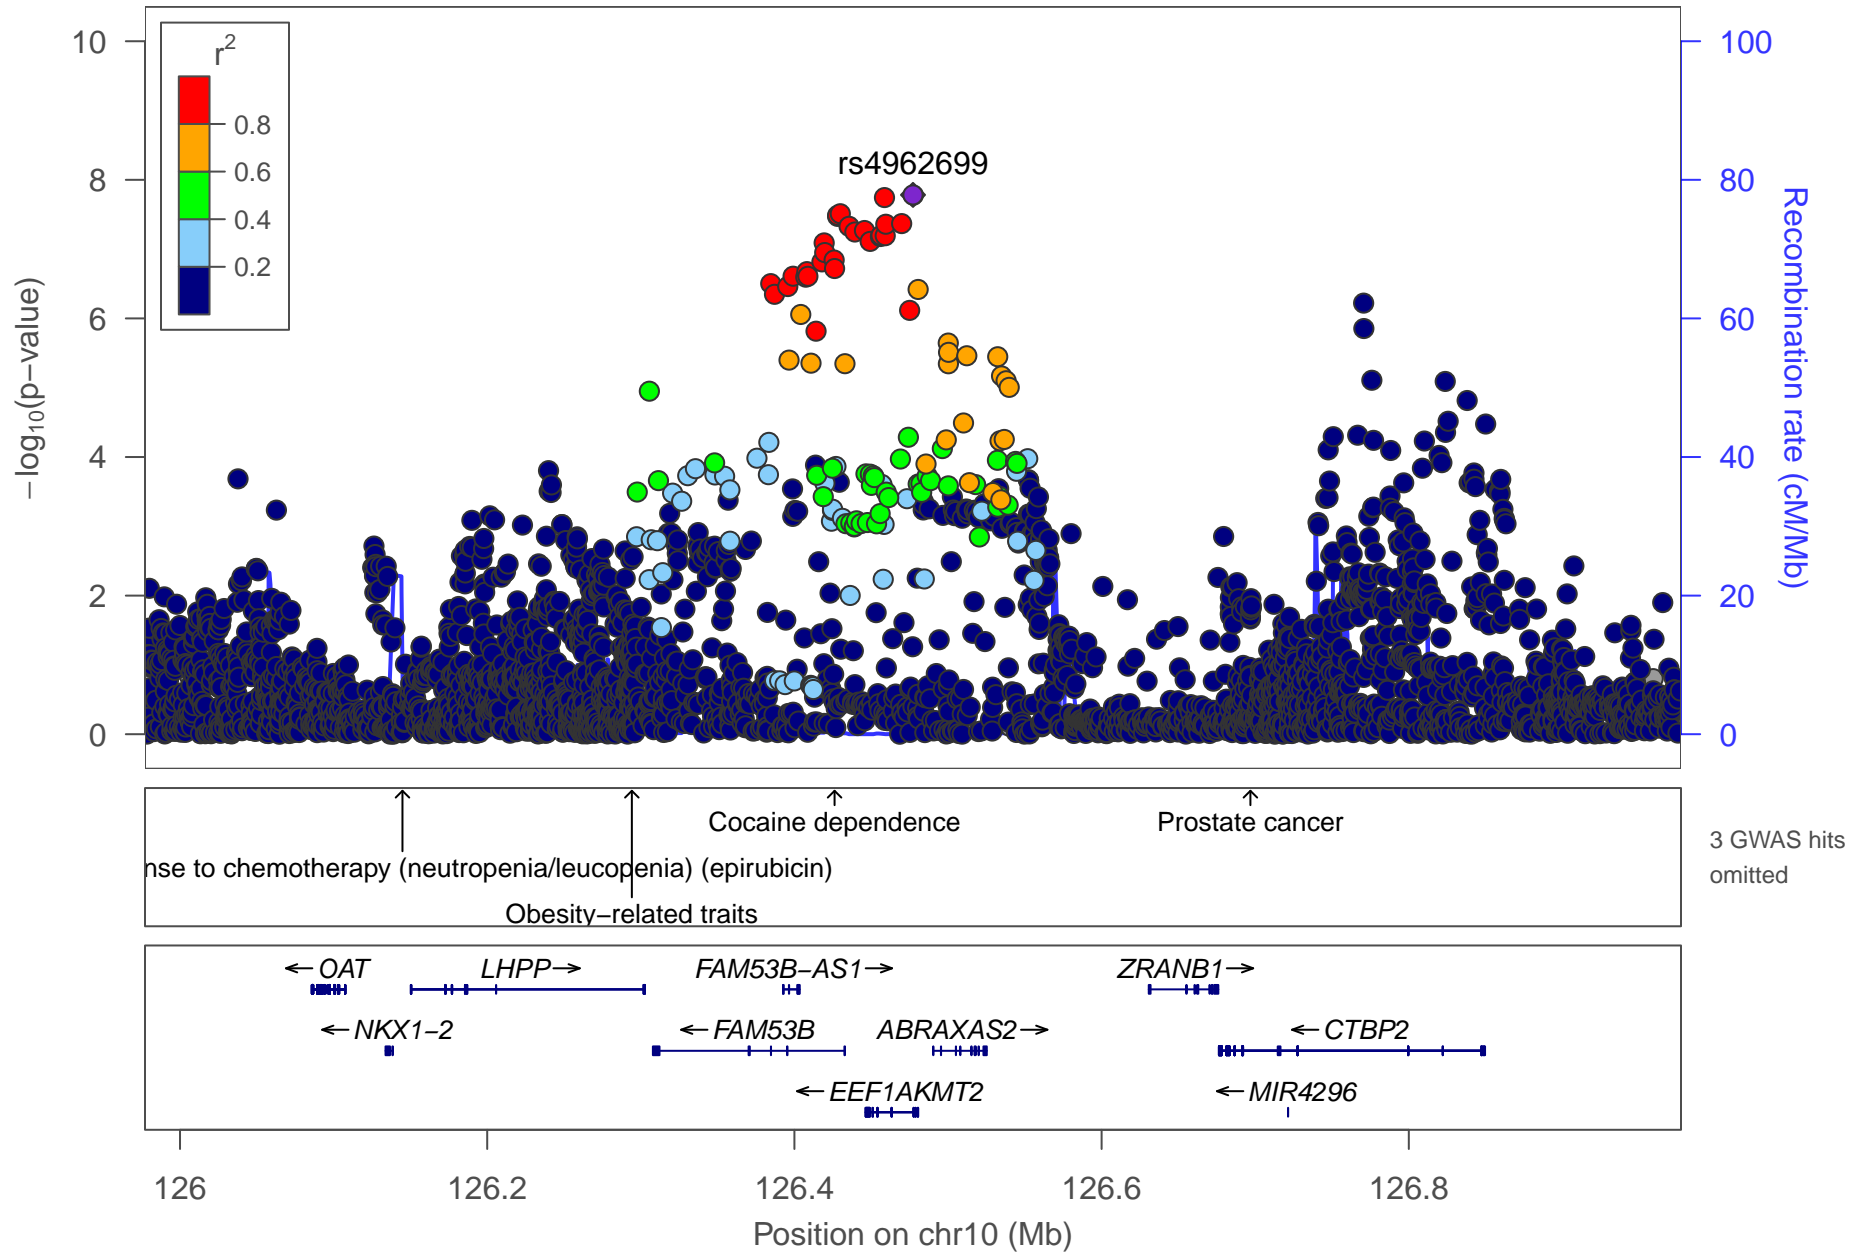

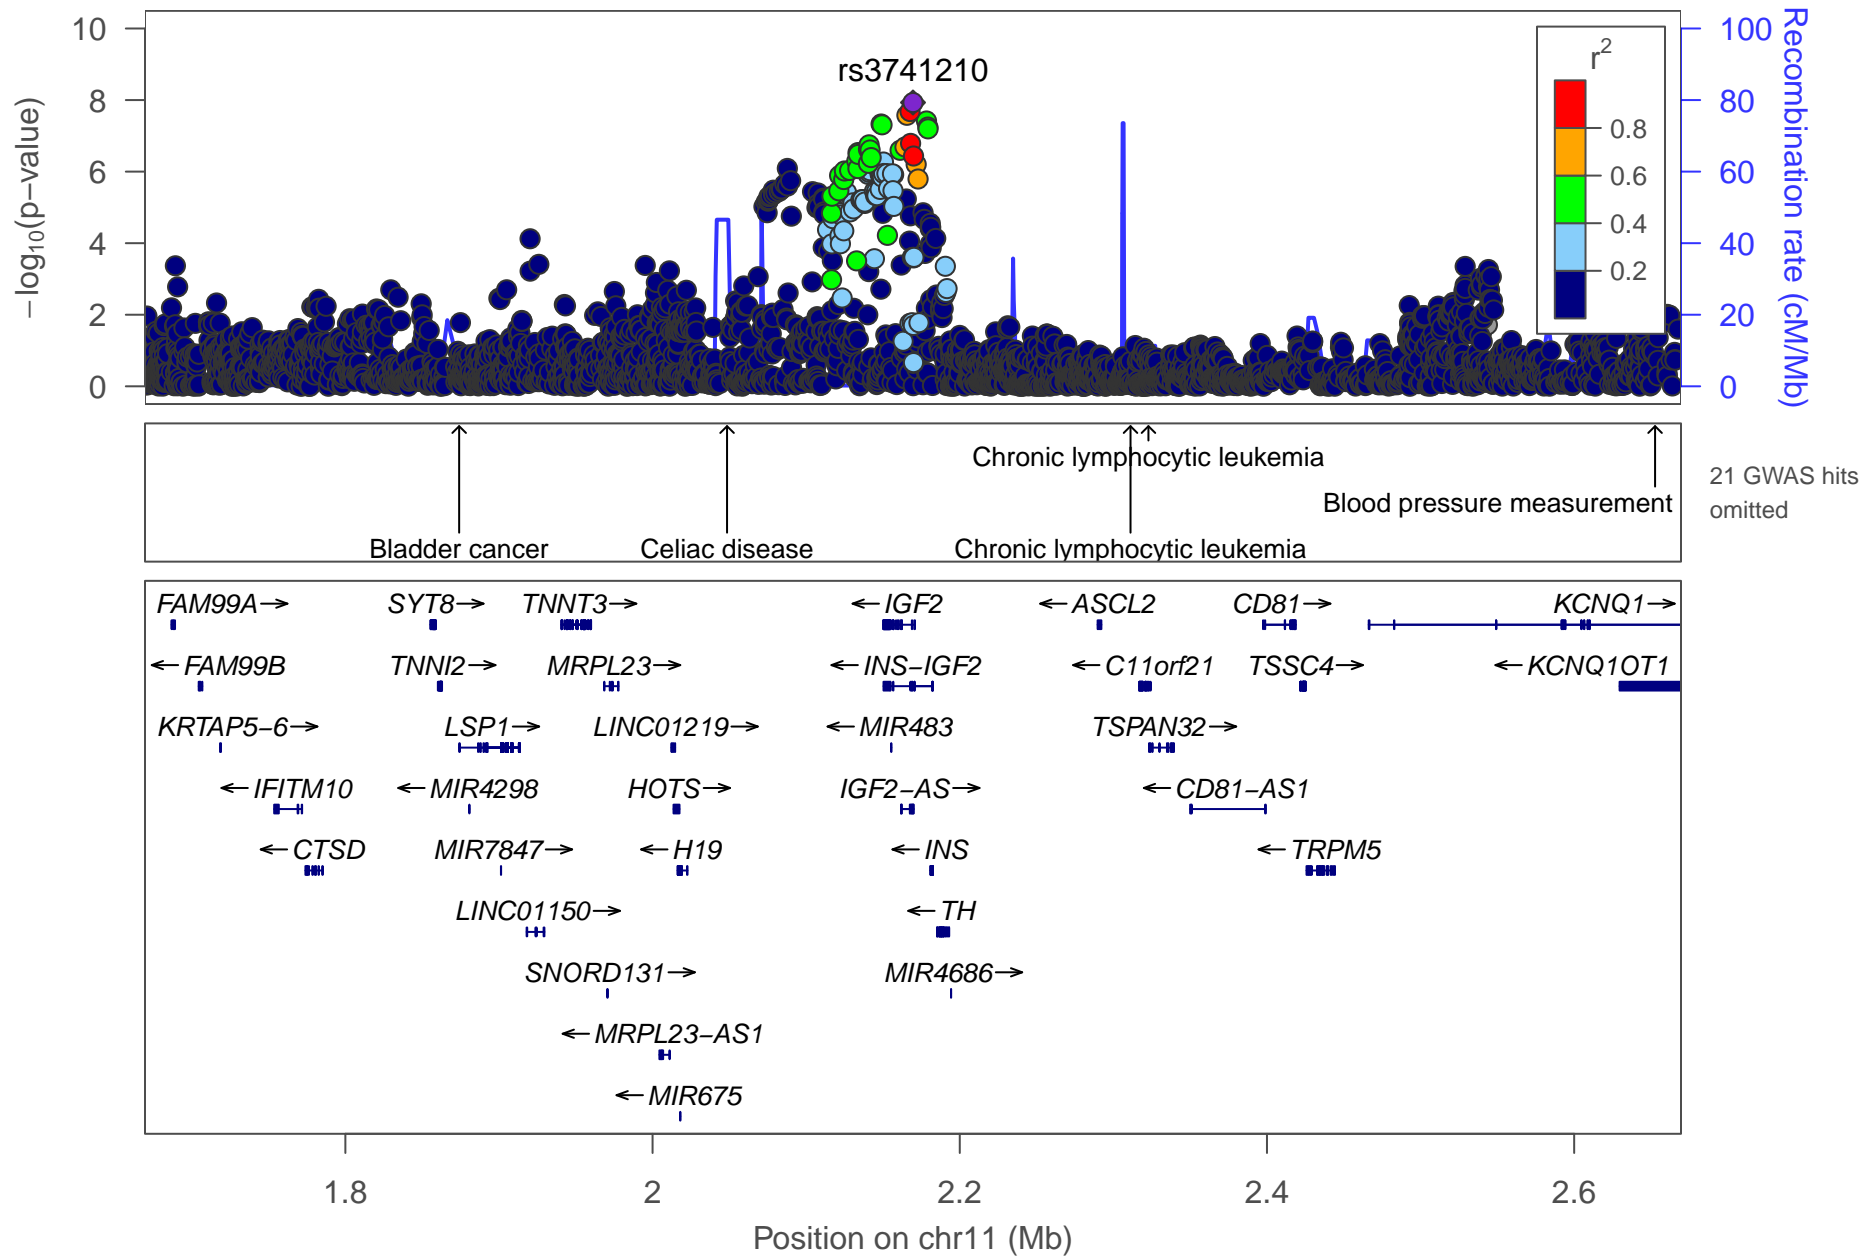



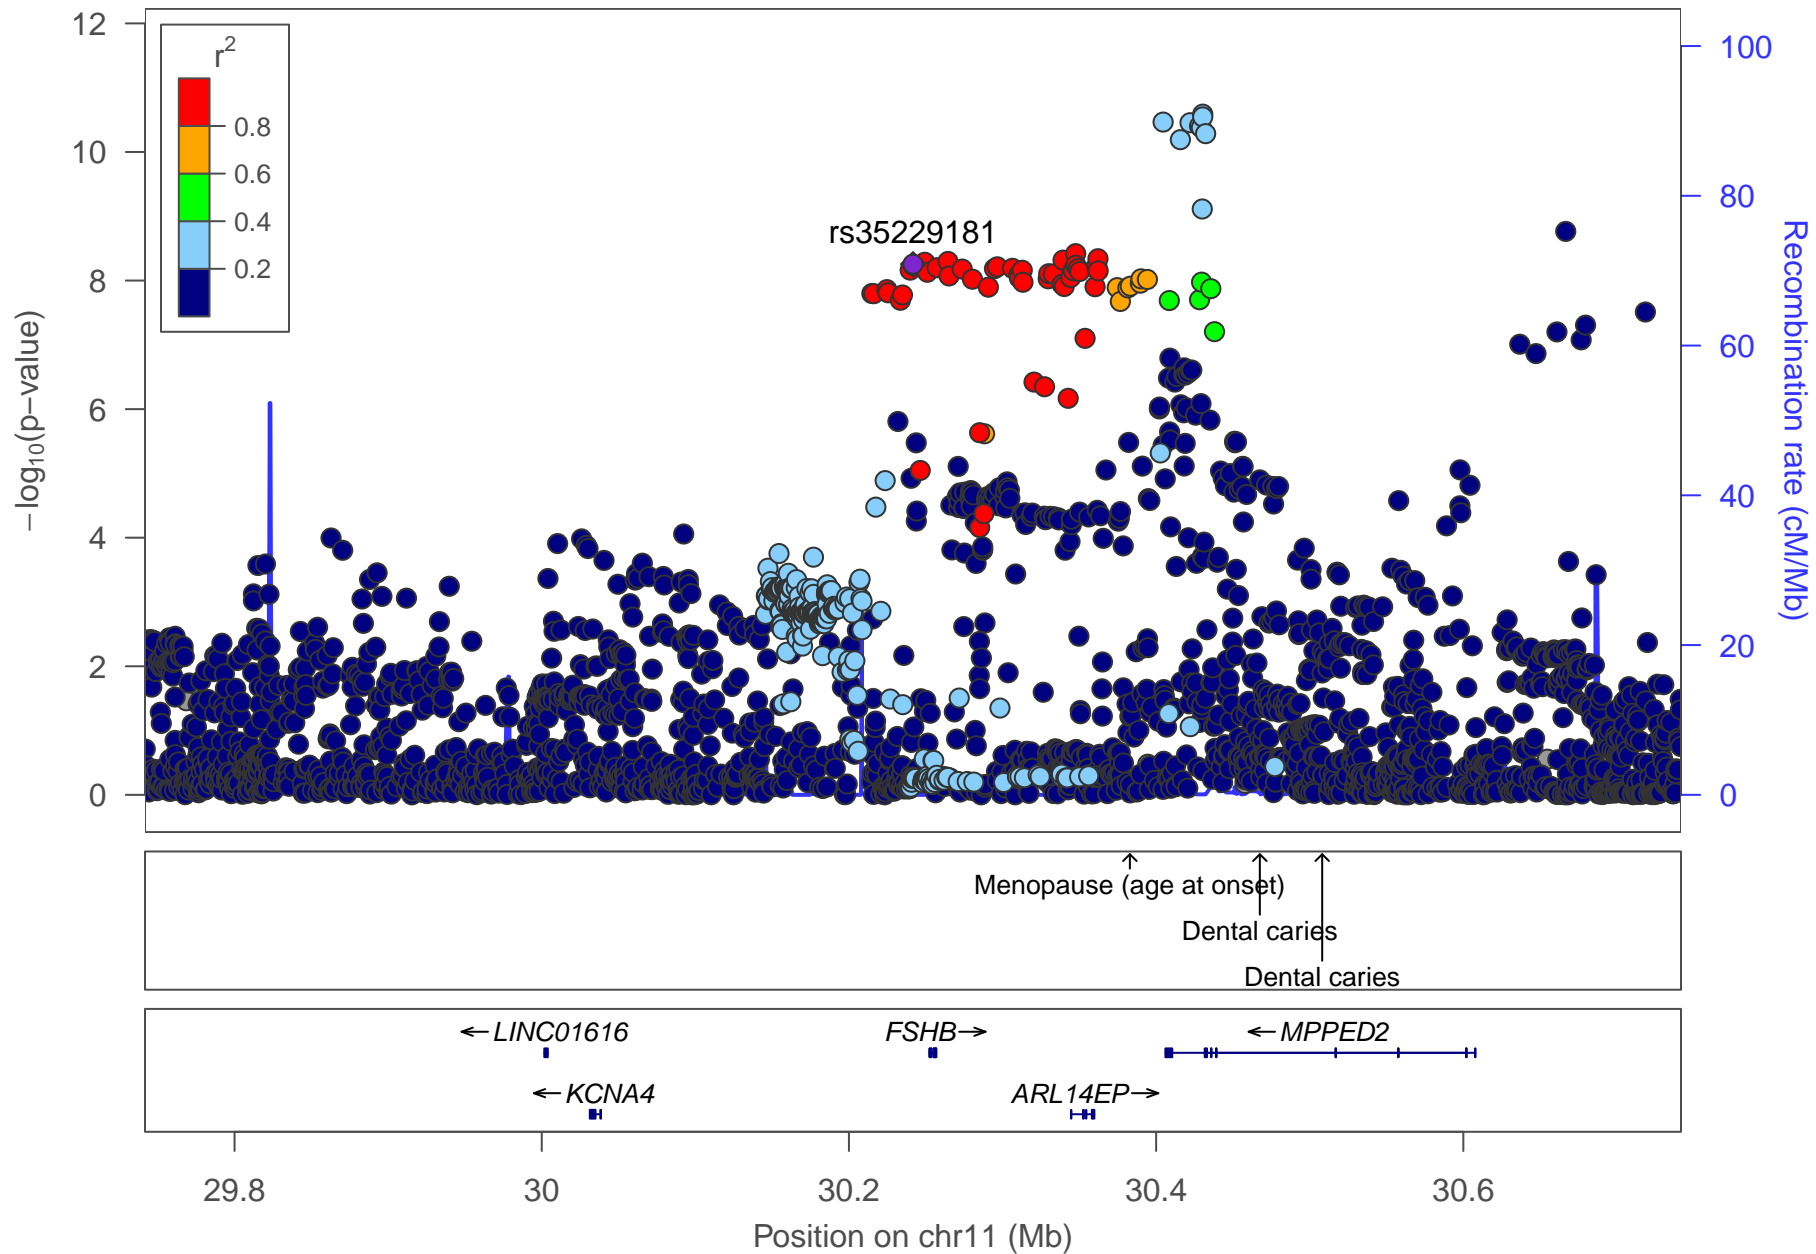

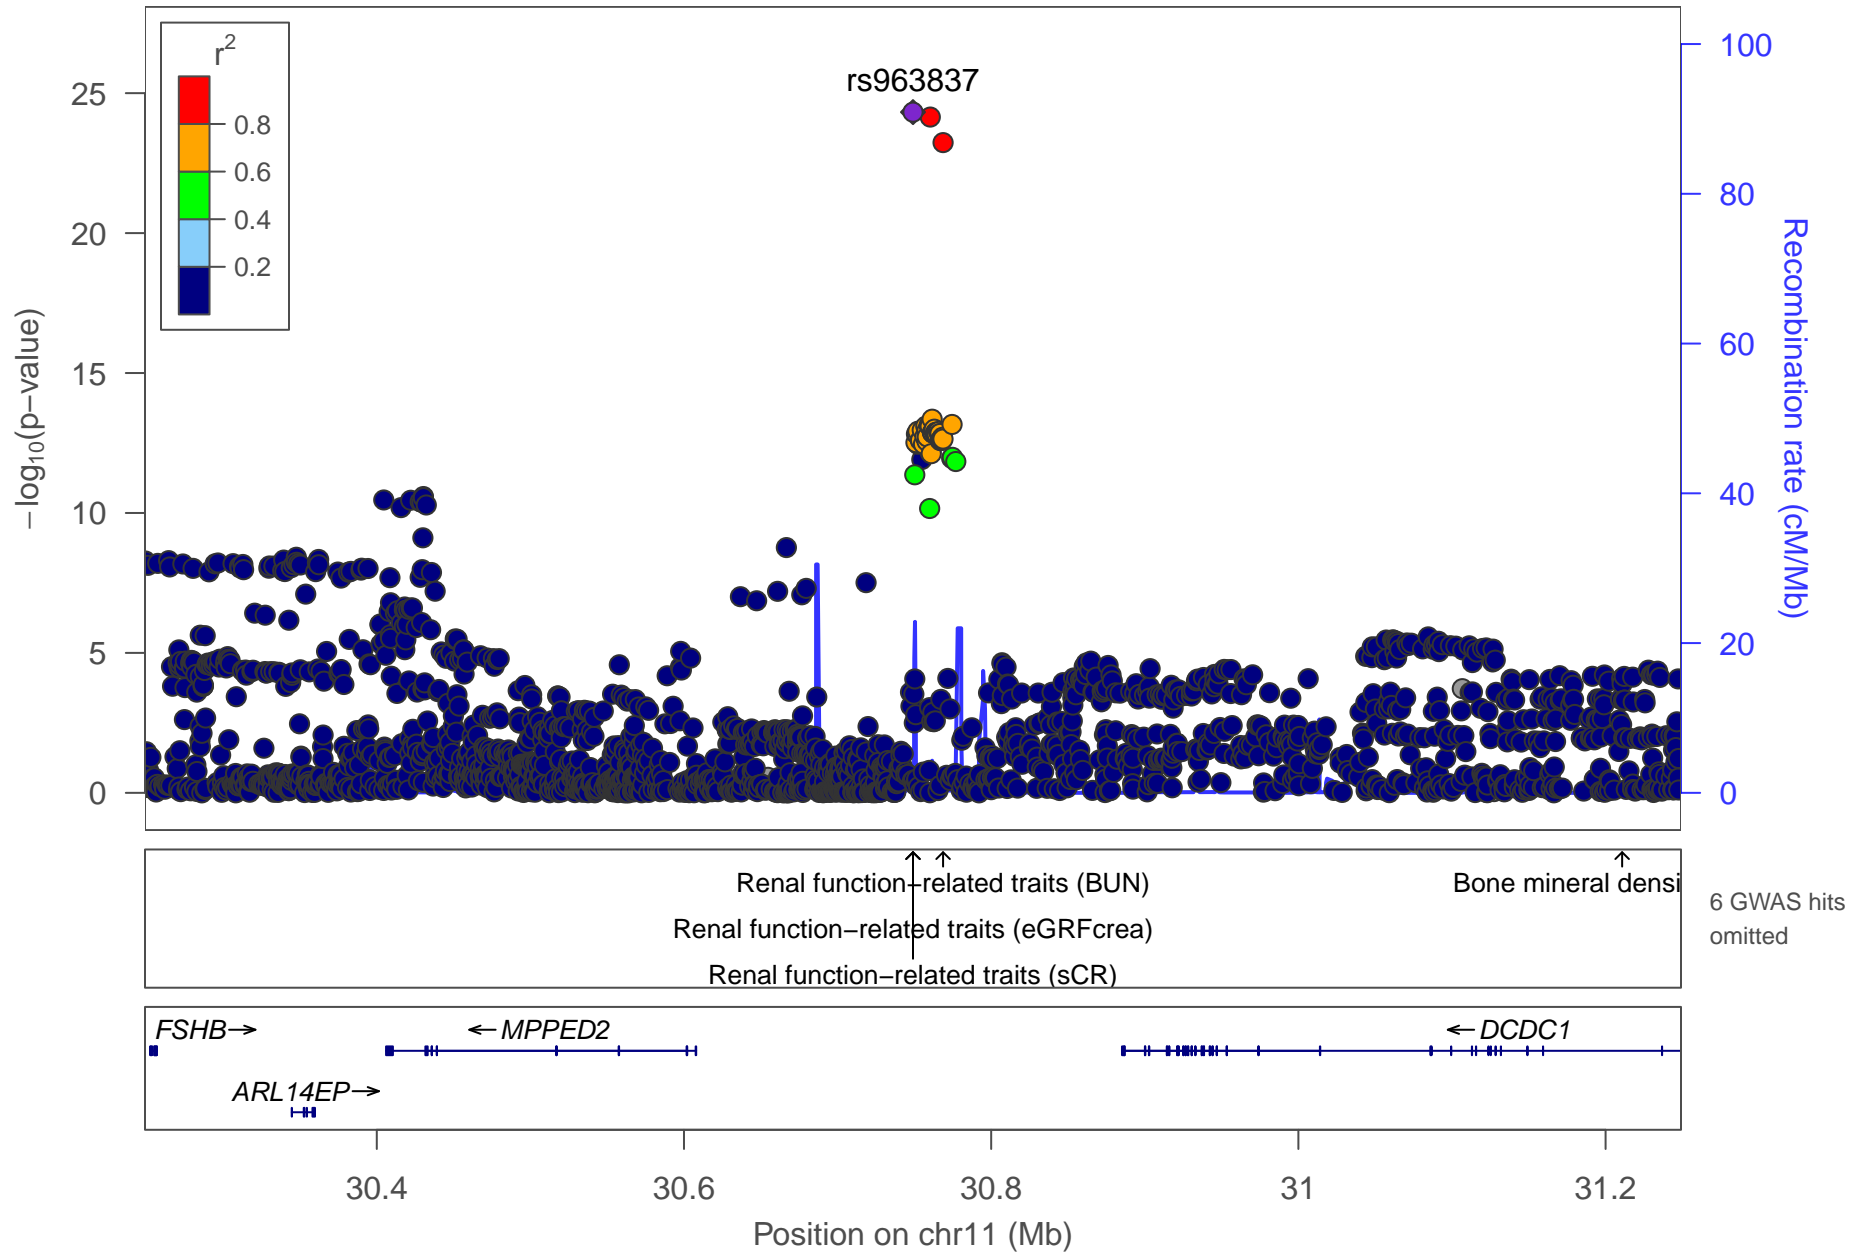

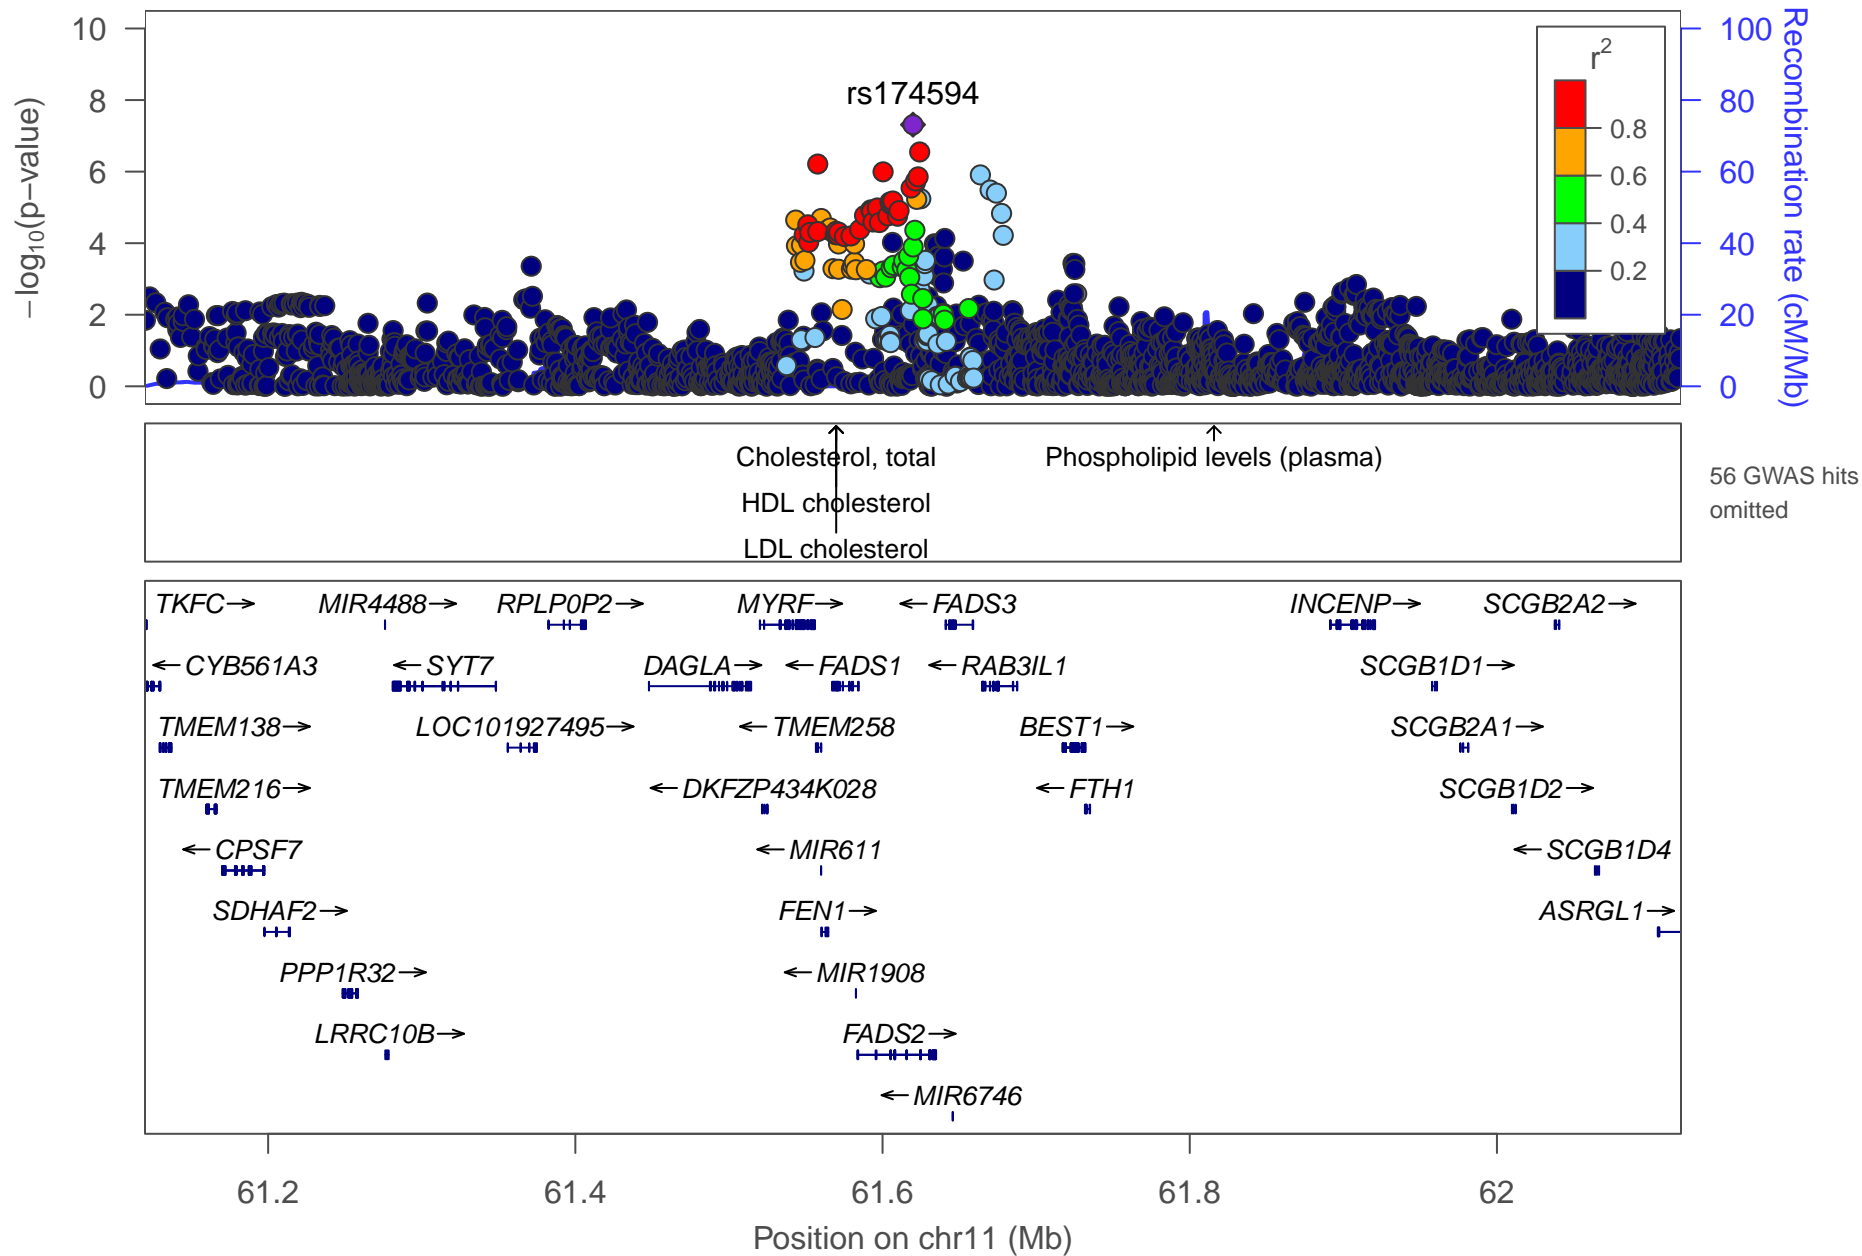

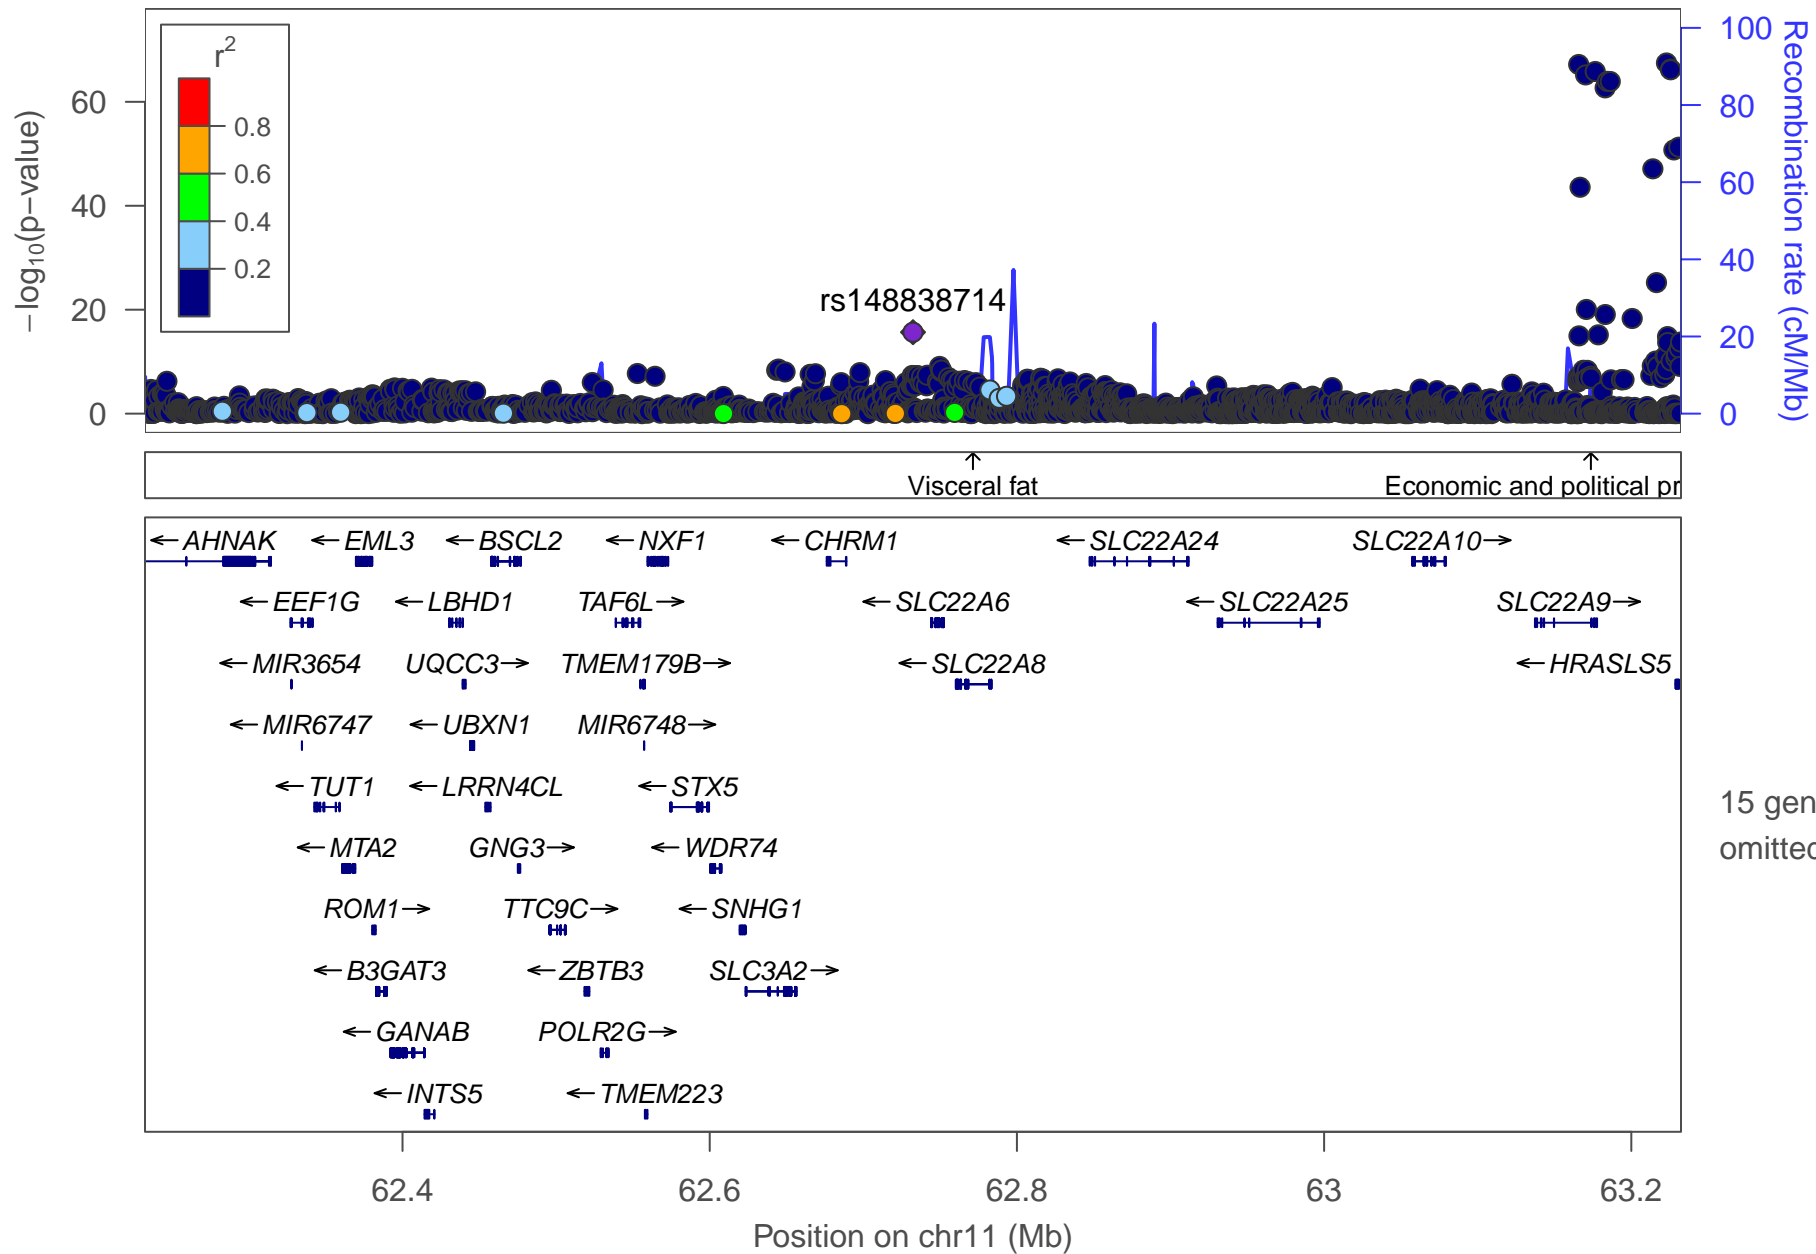

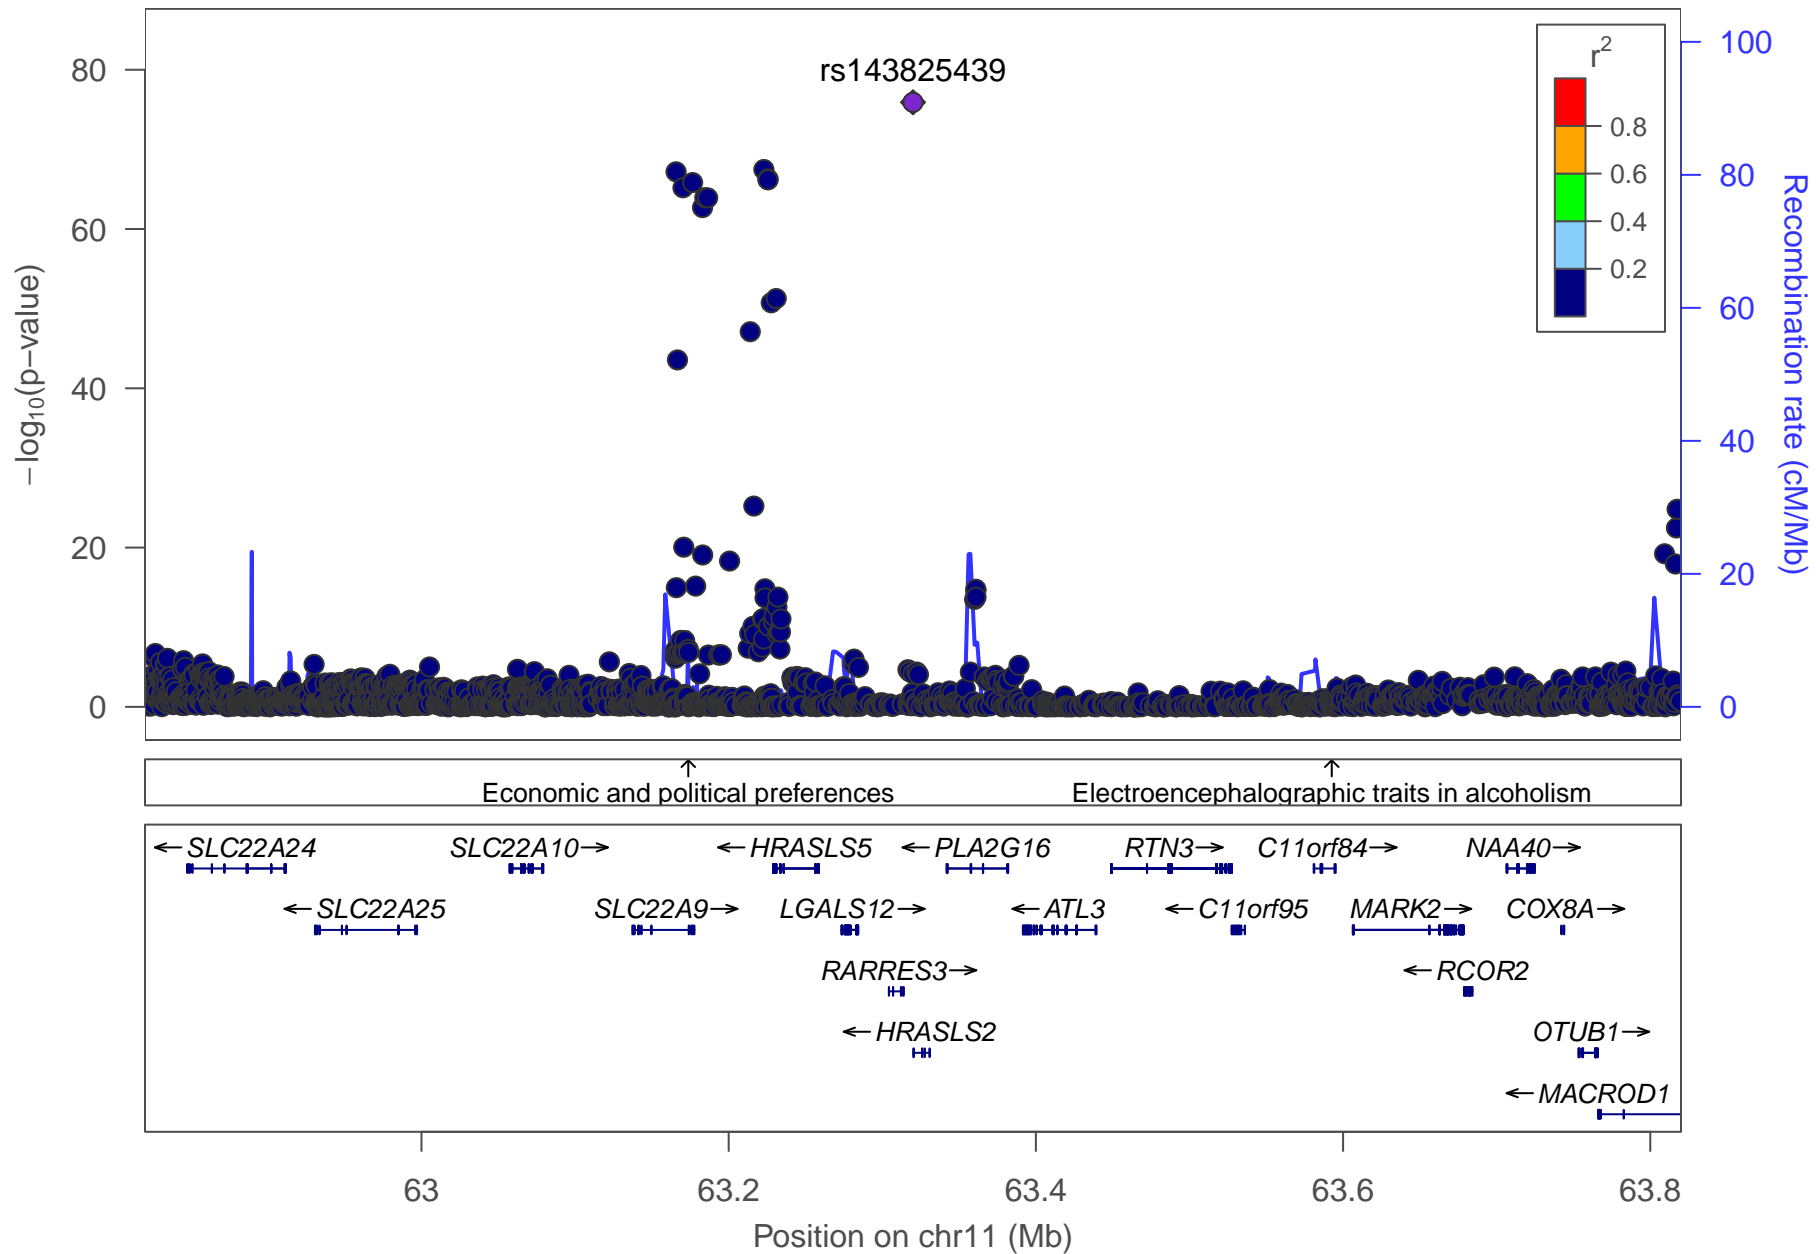

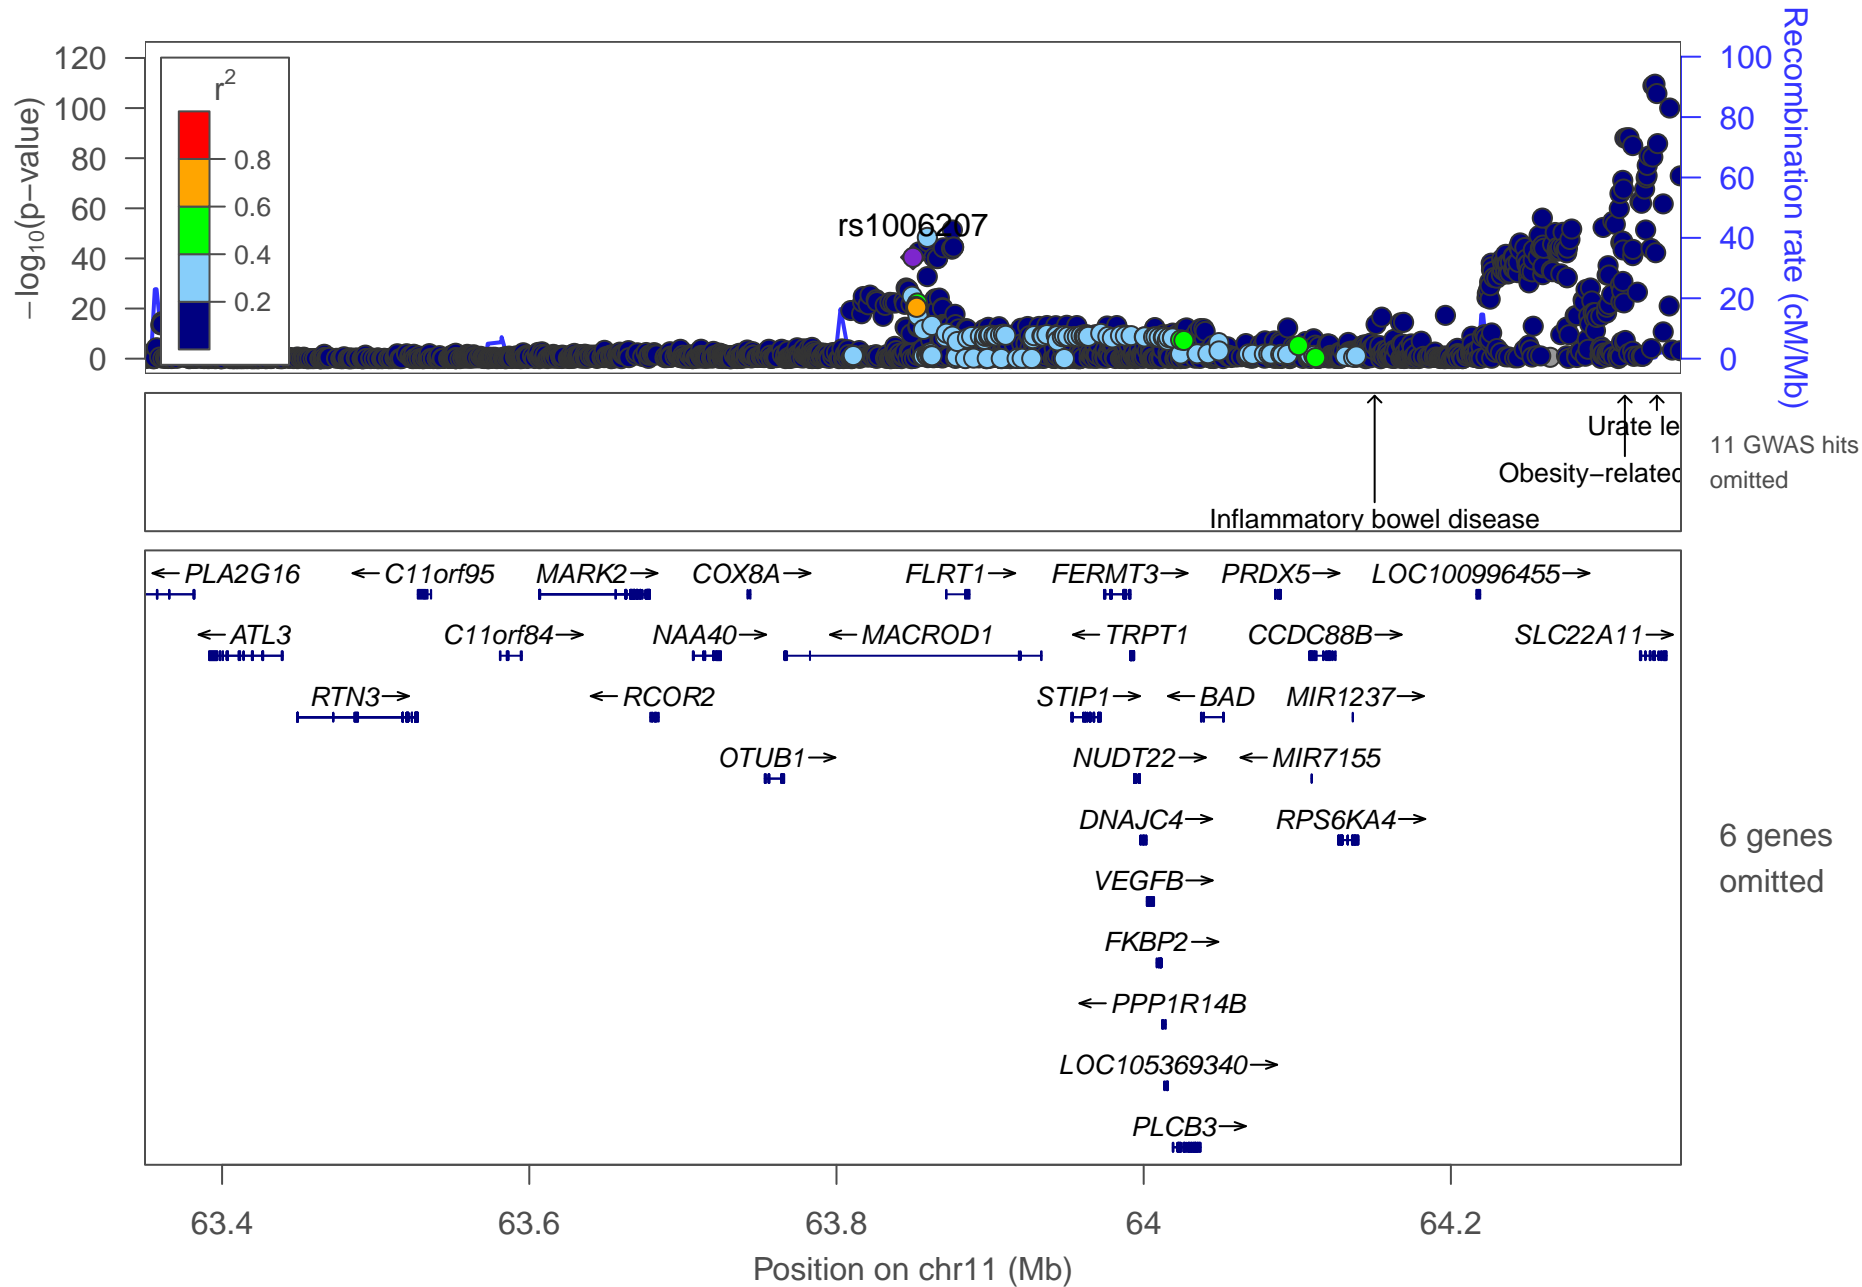

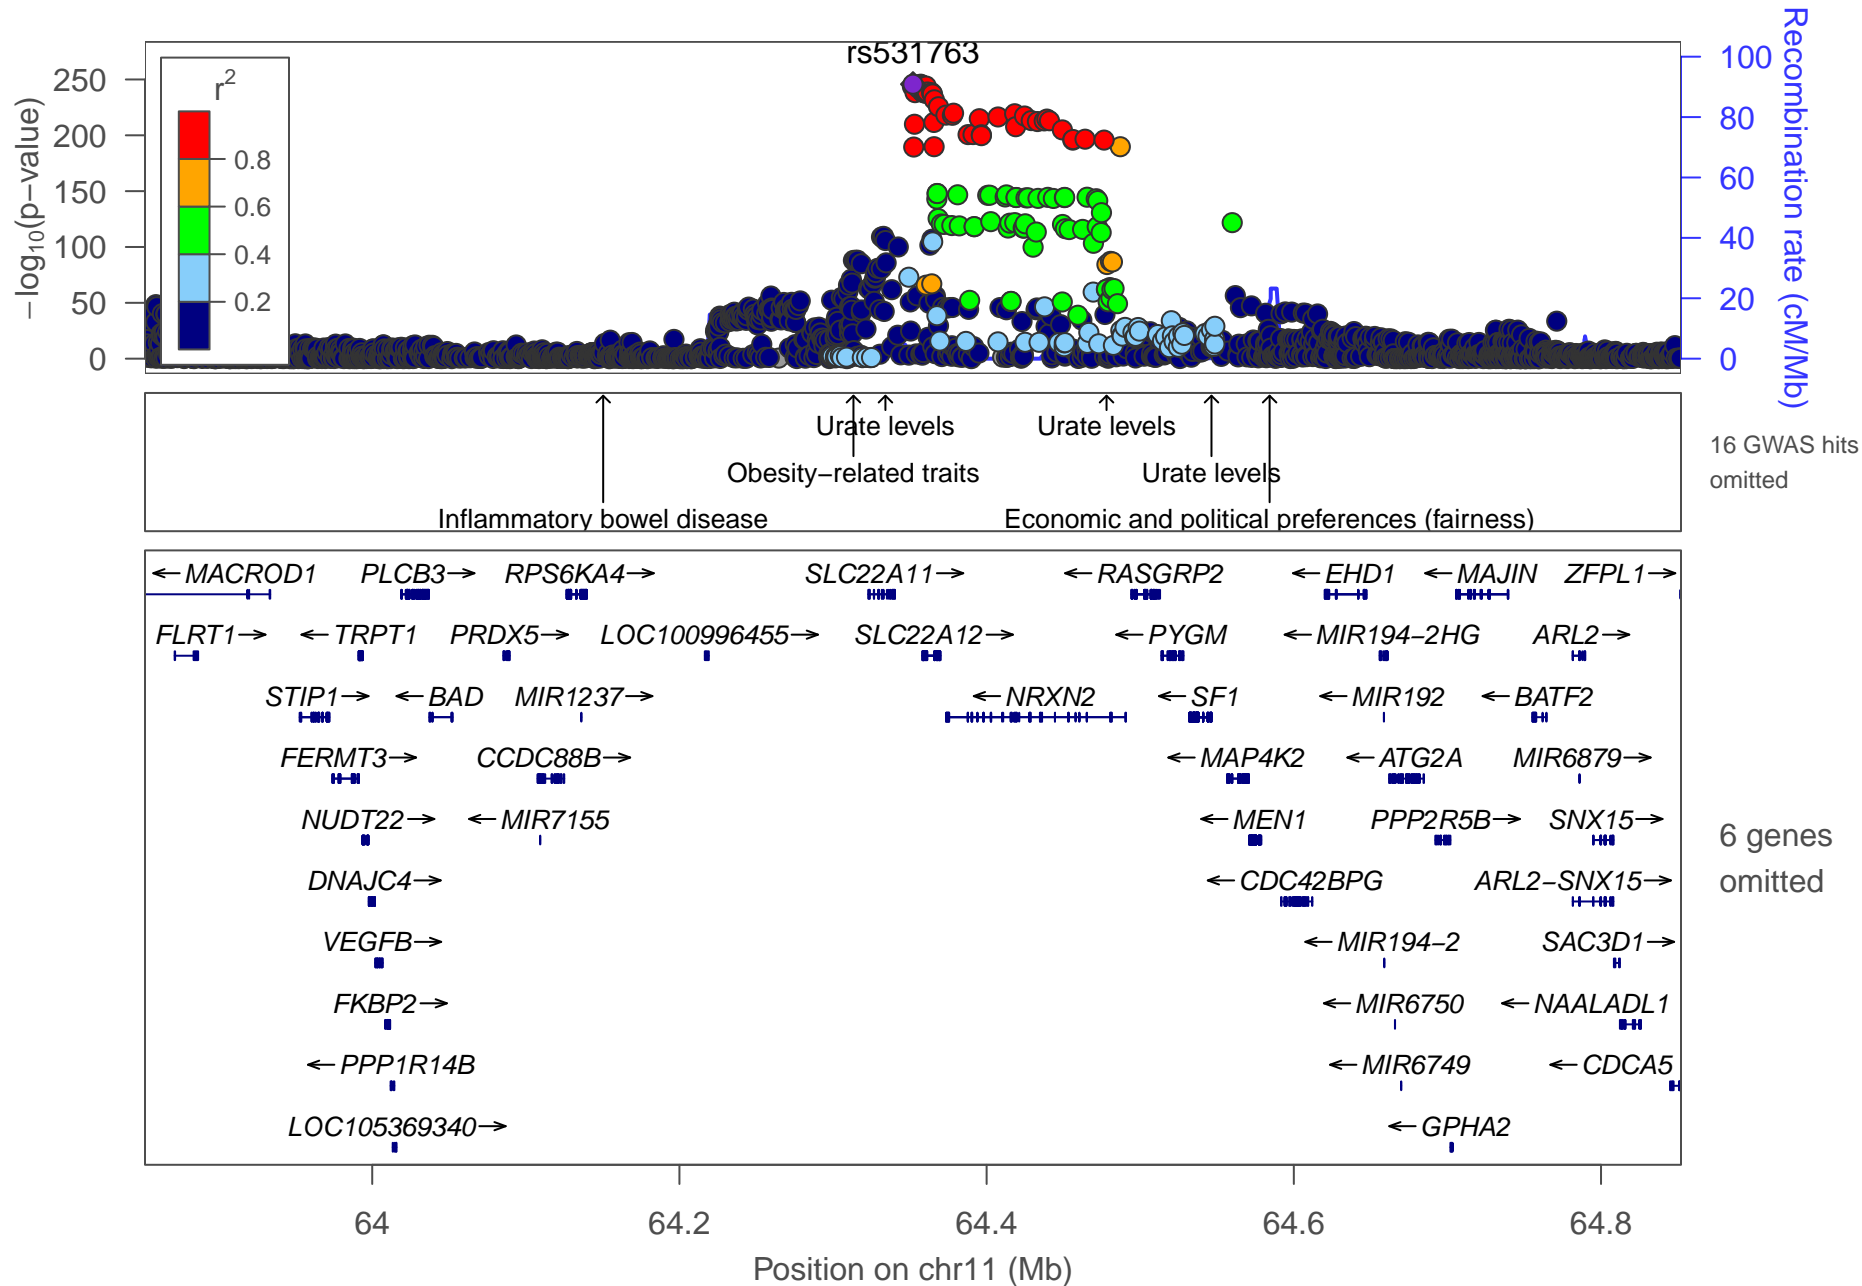

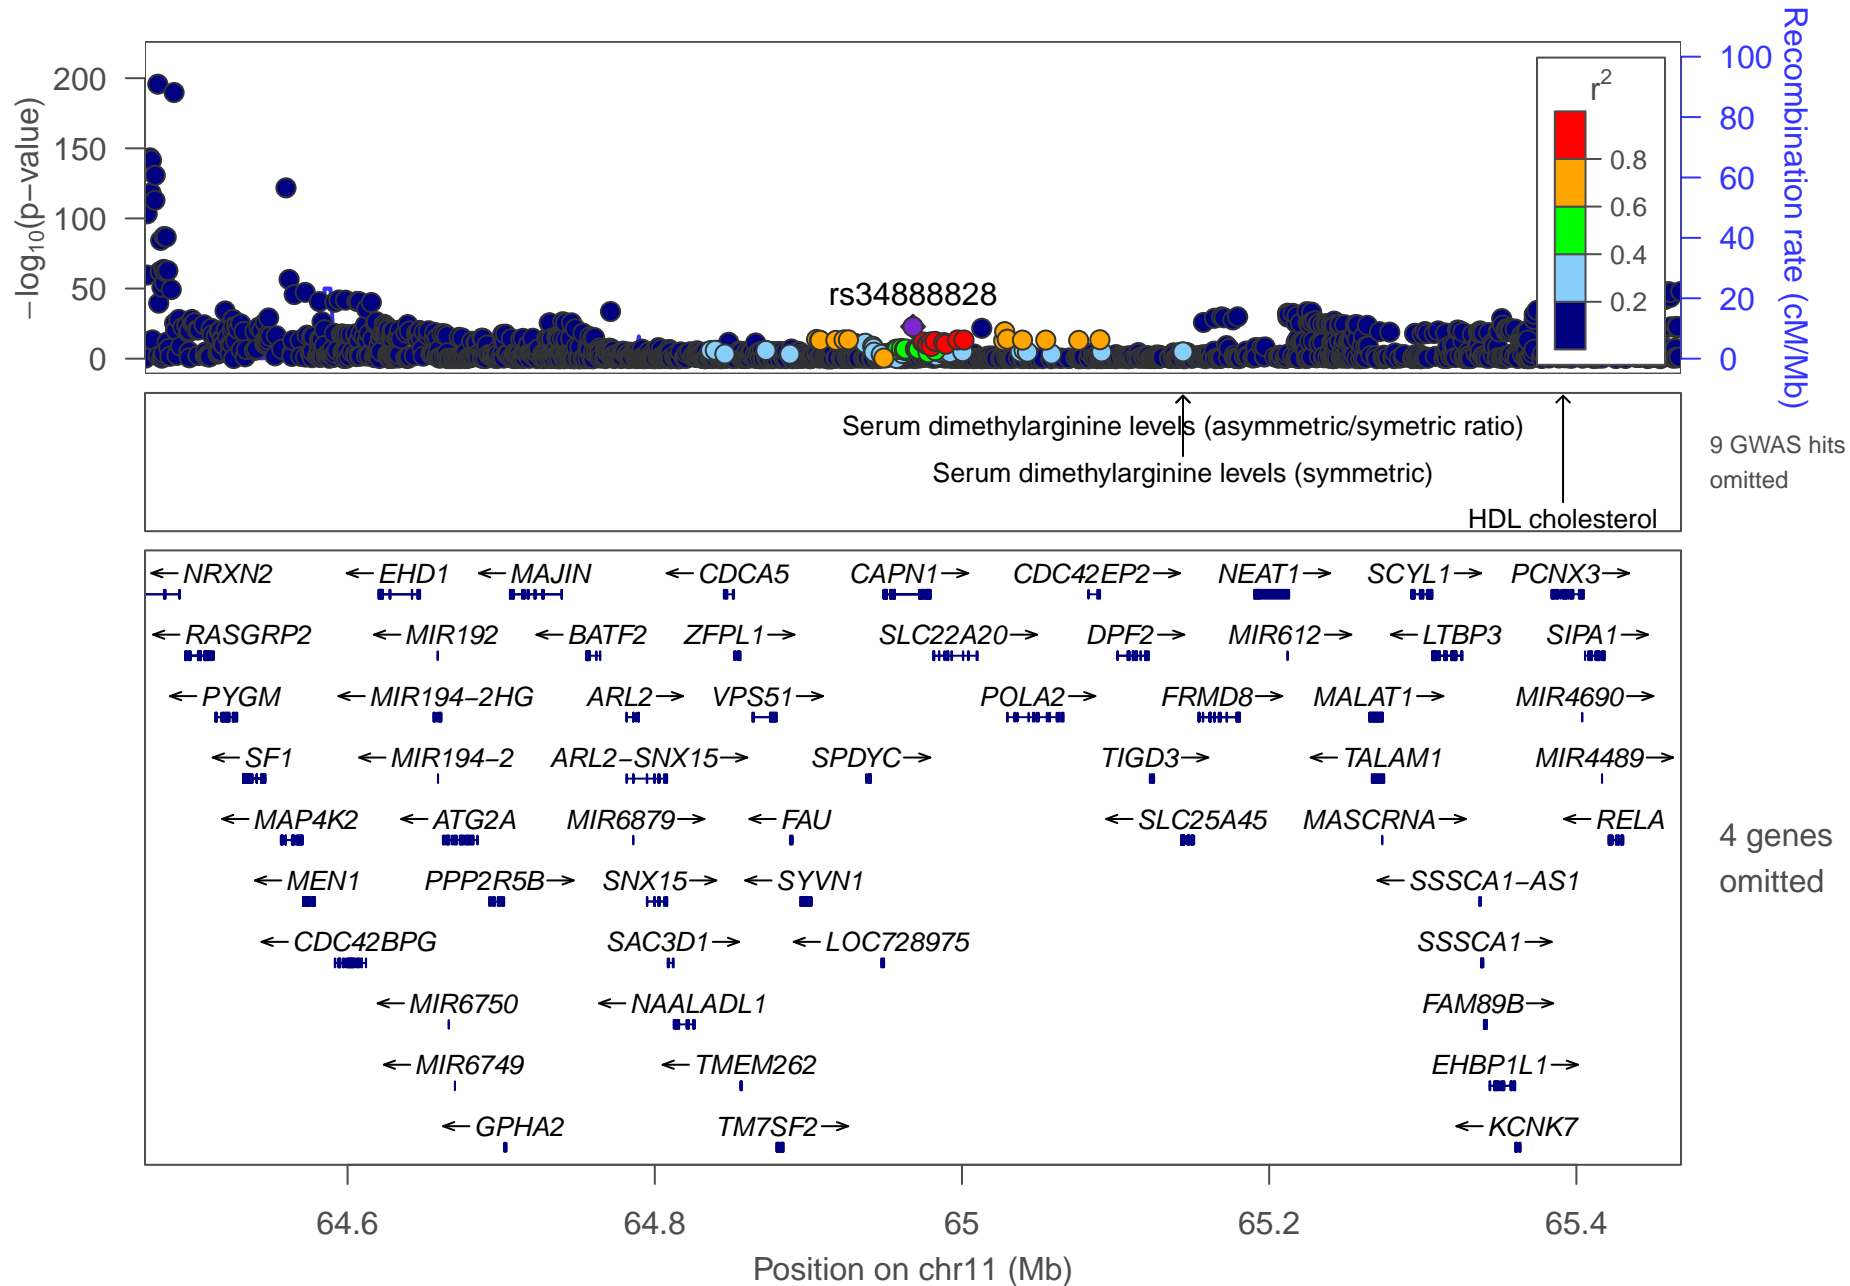



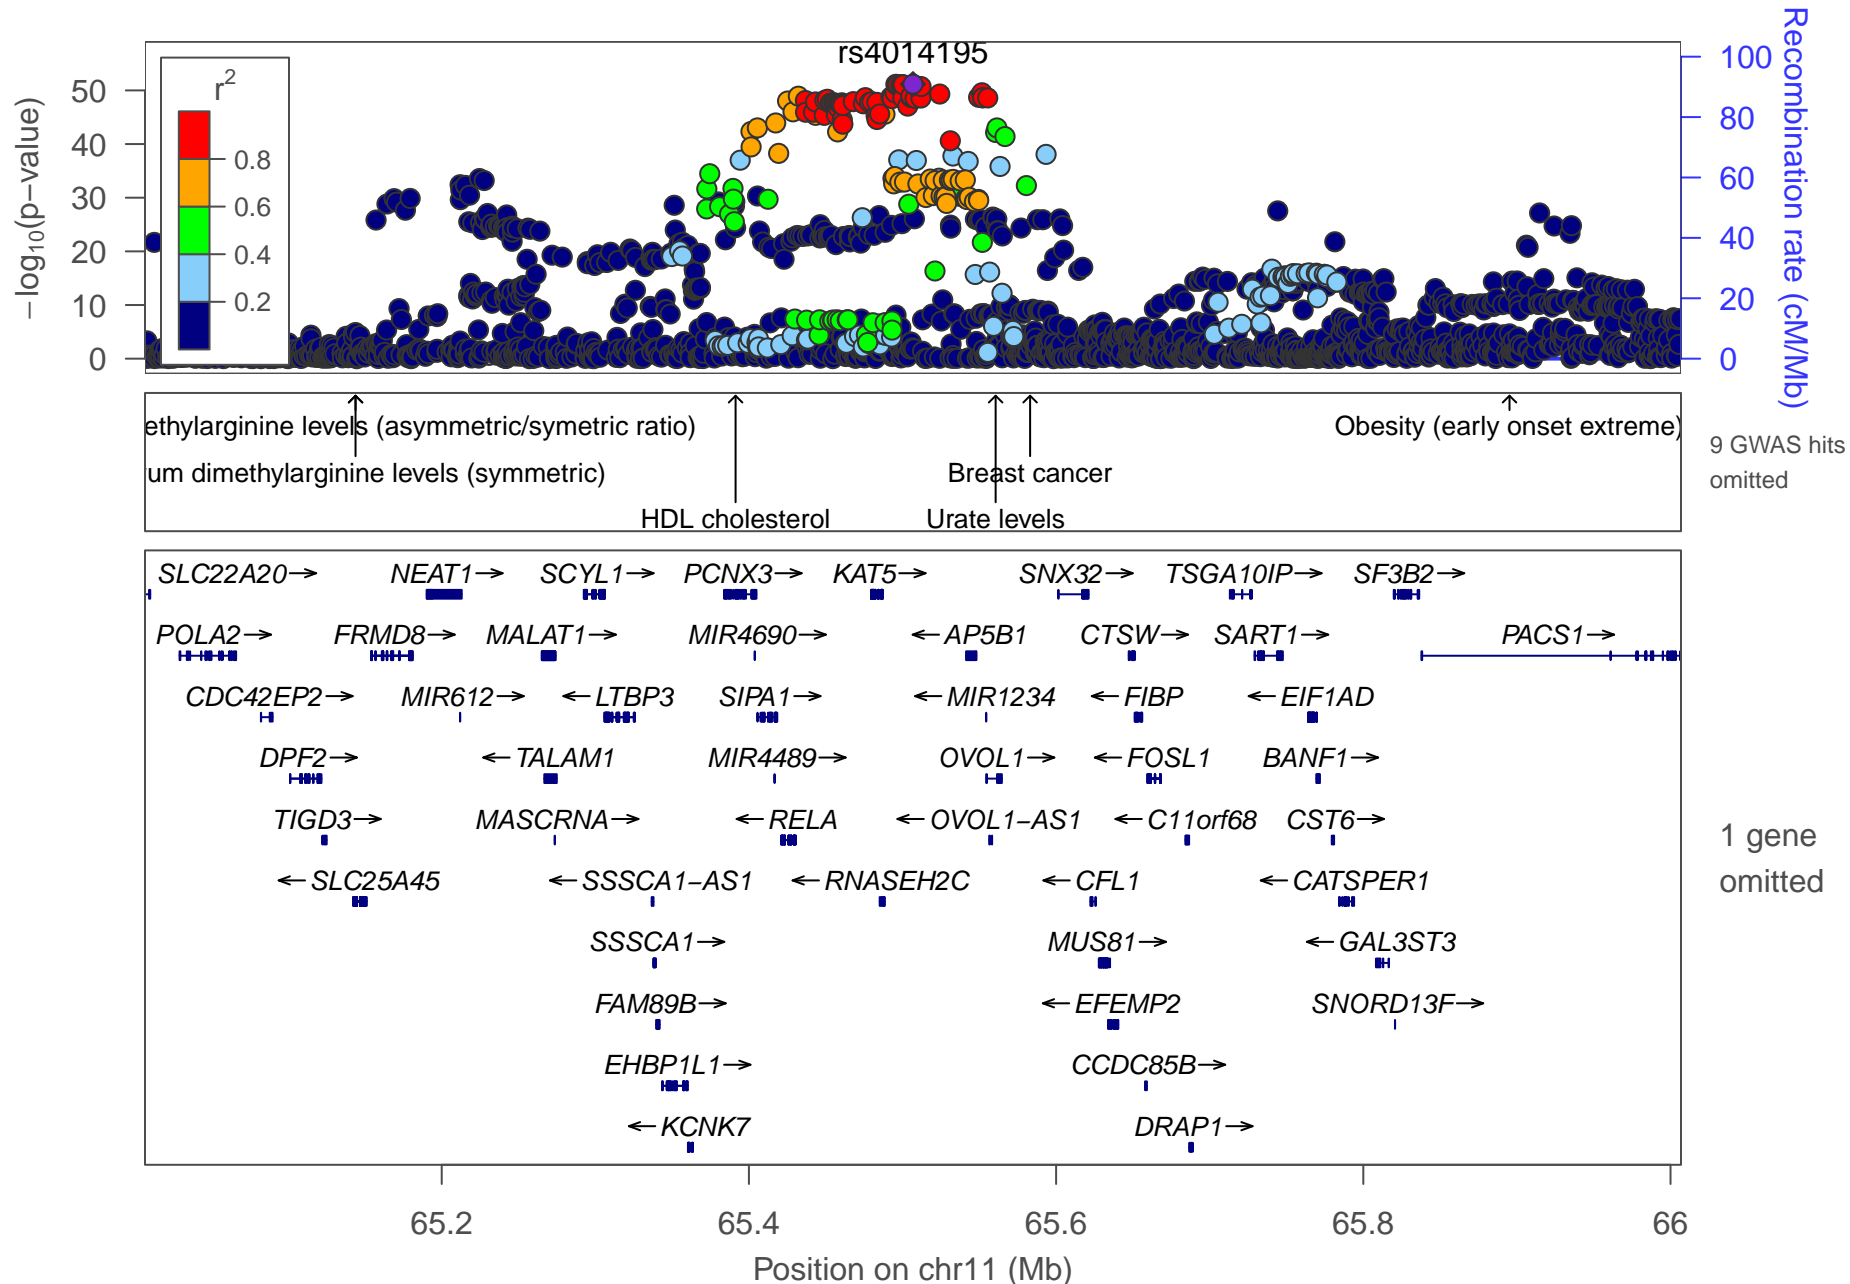

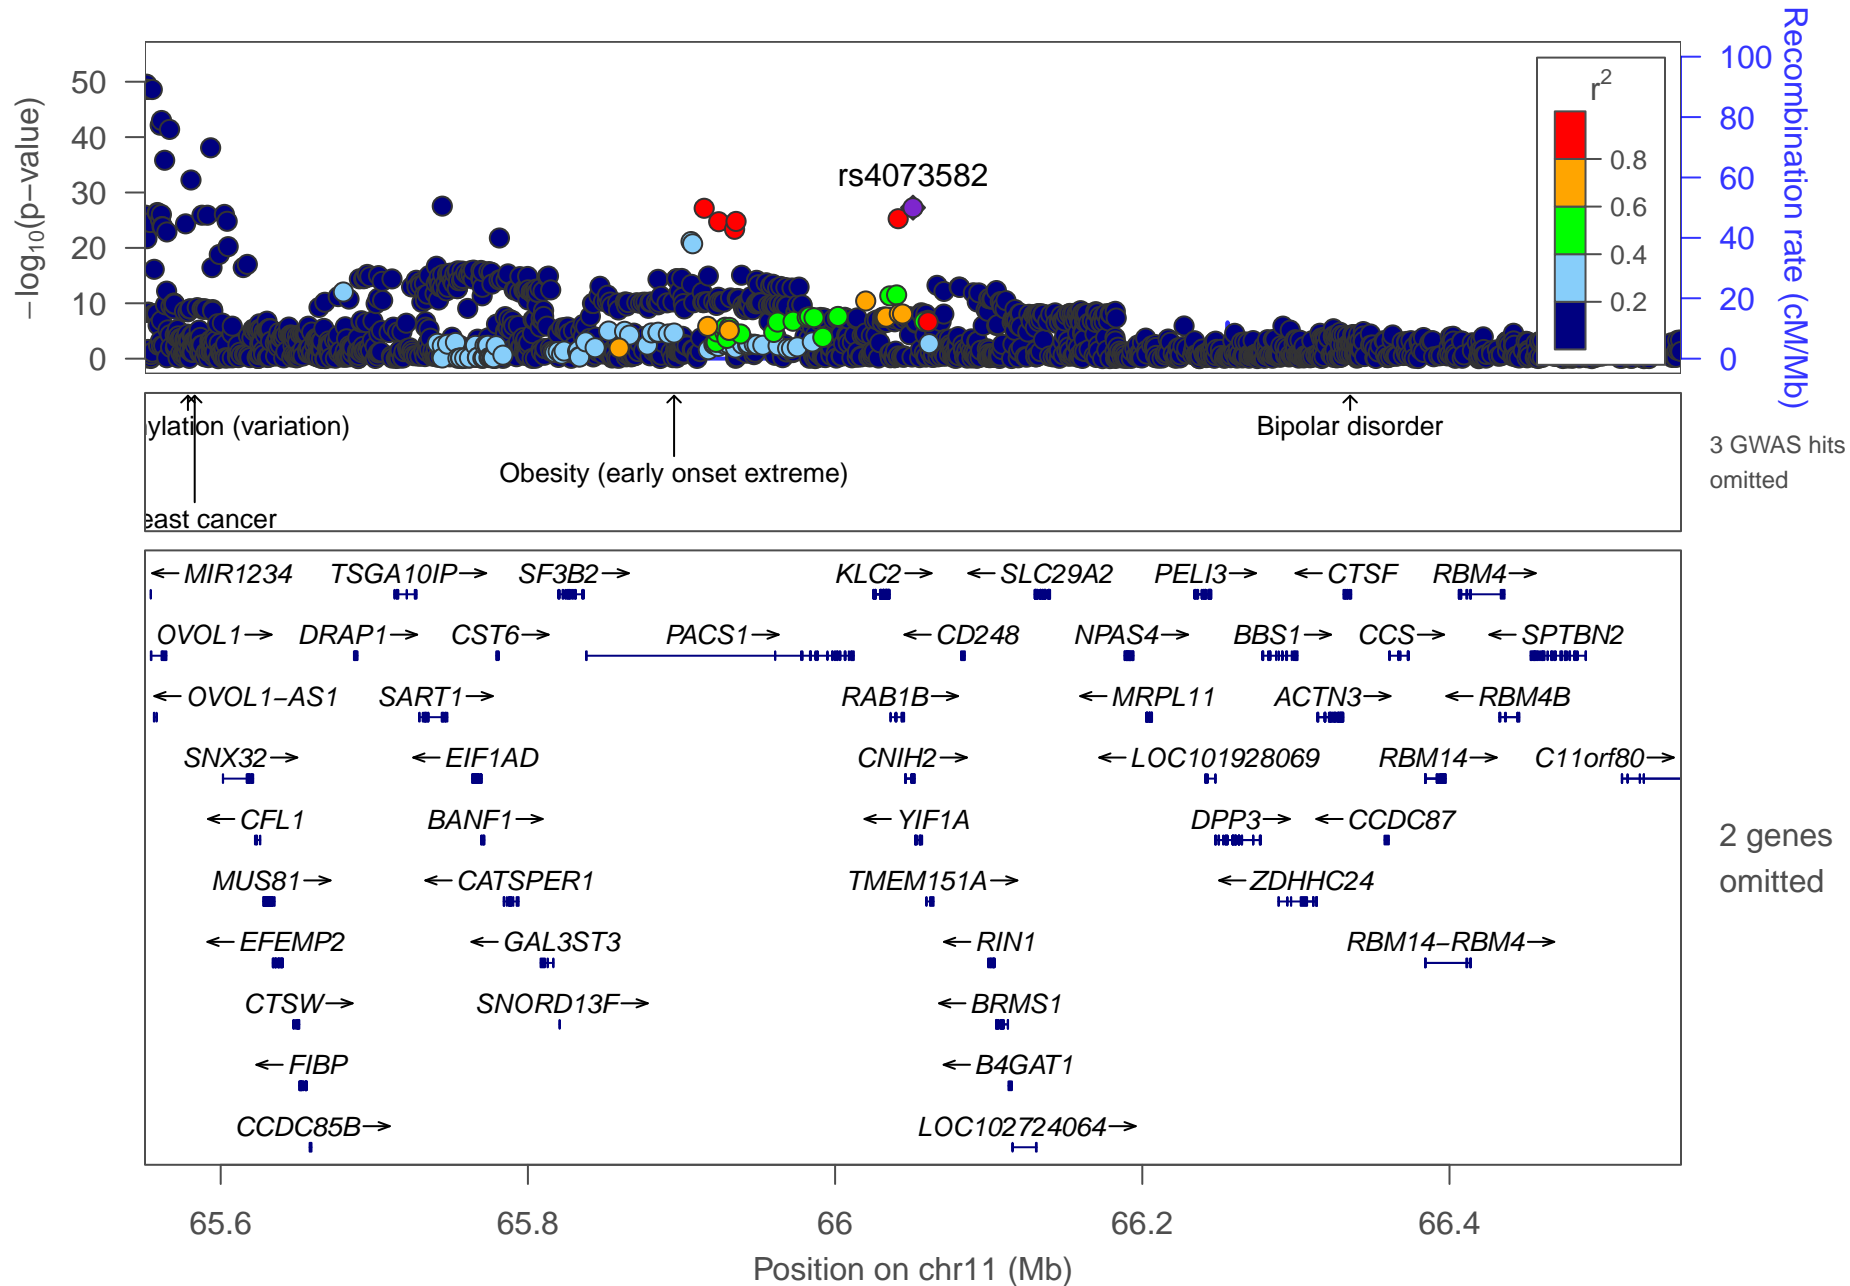

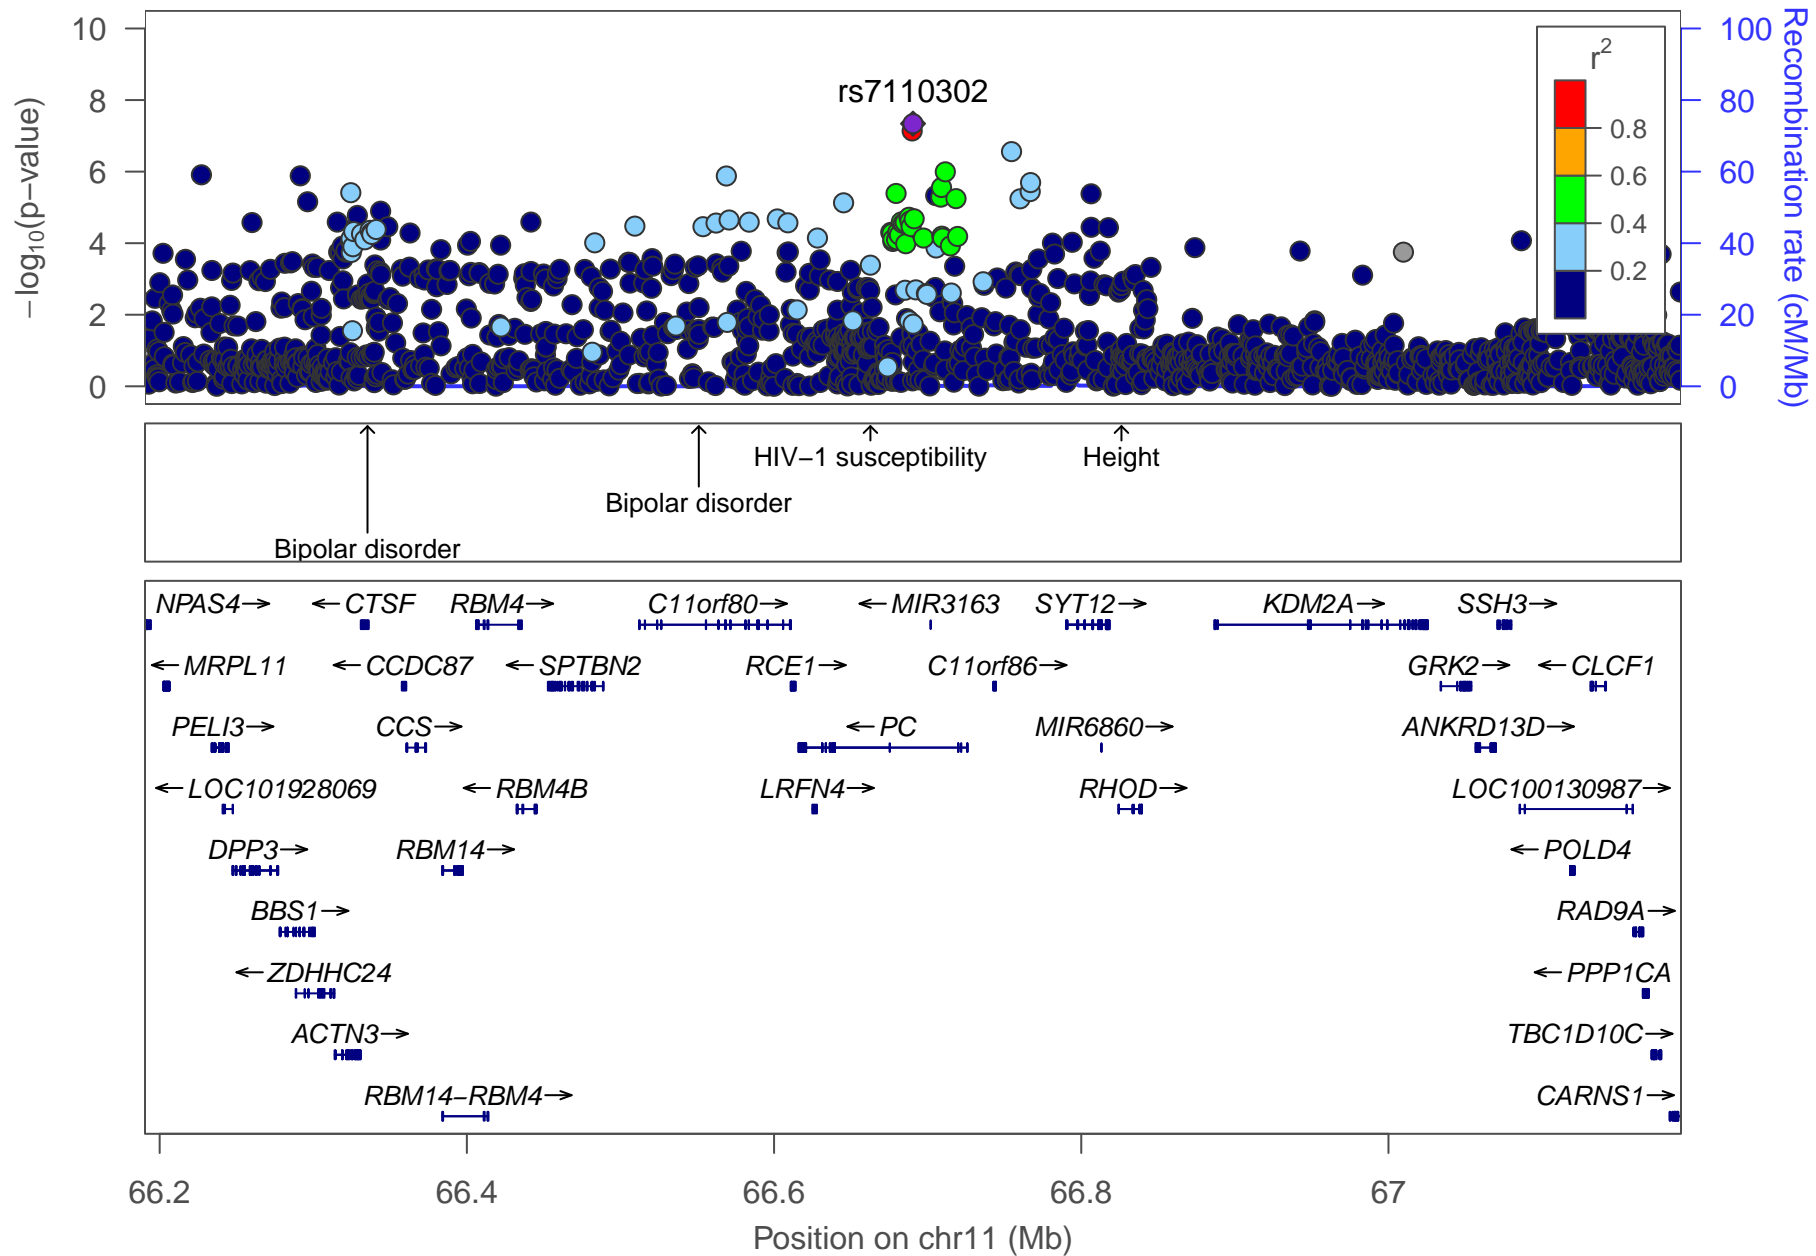

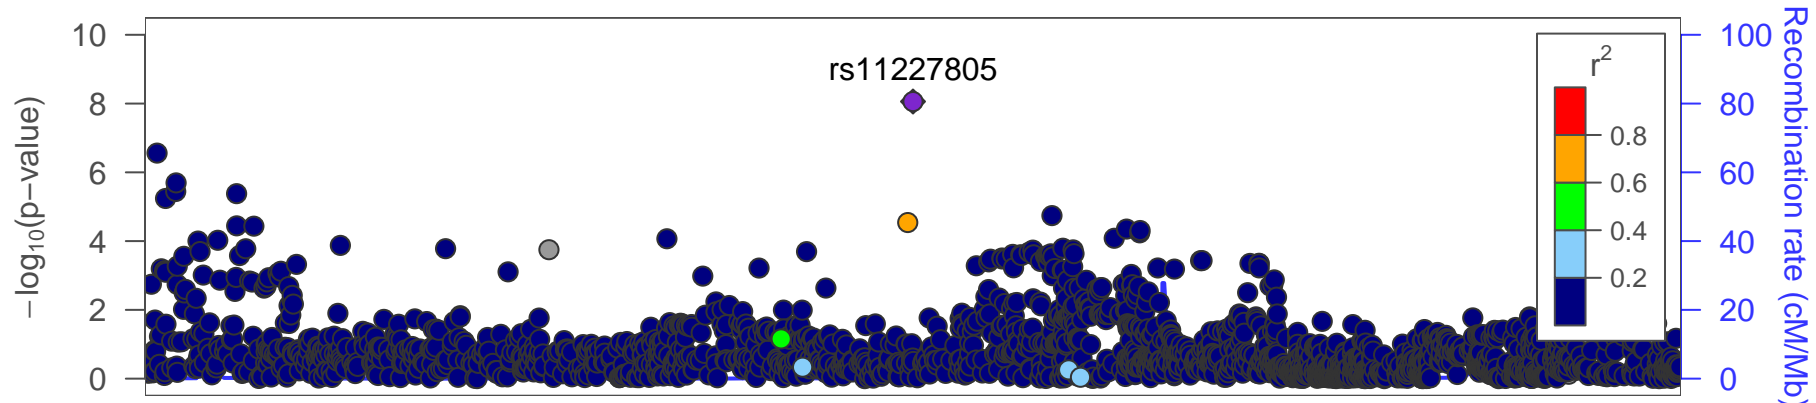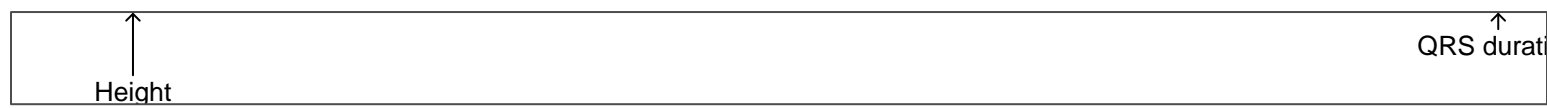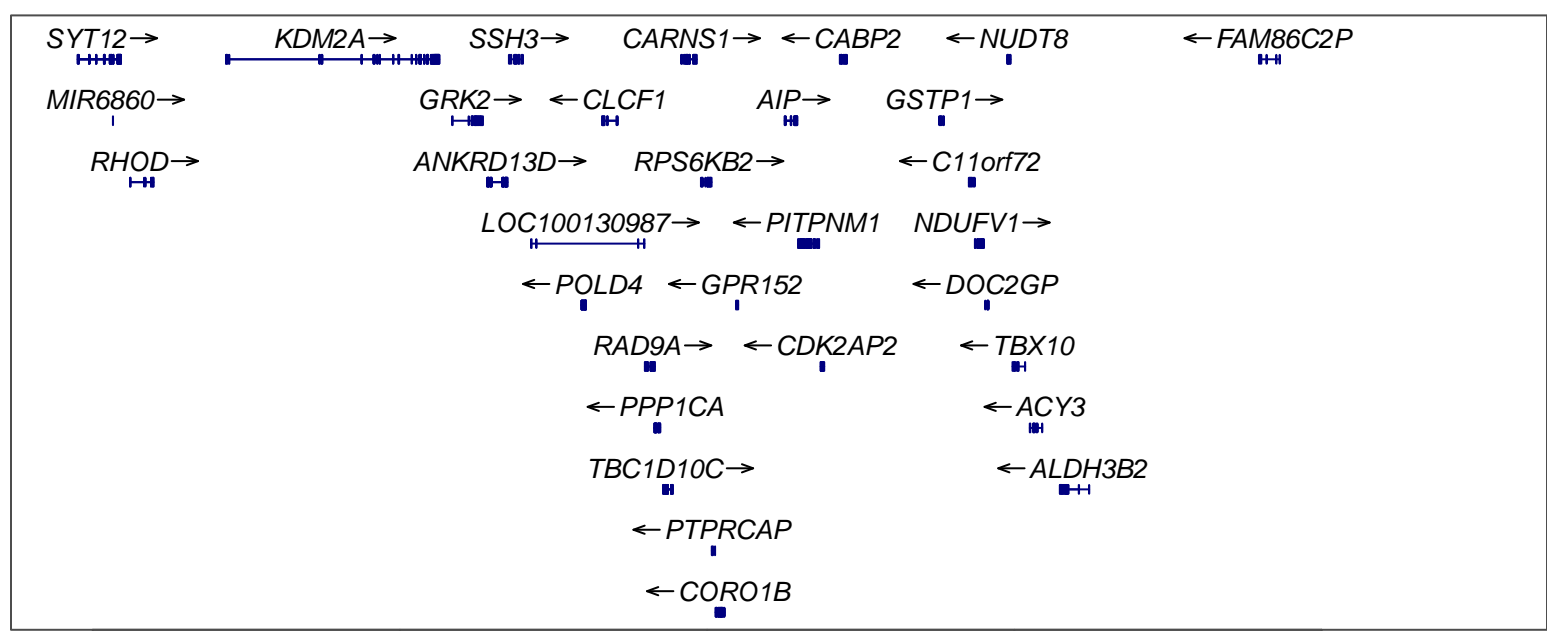

3 genes omitted

66.8                      67                      67.2                      67.4                      67.6

Position on chr11 (Mb)

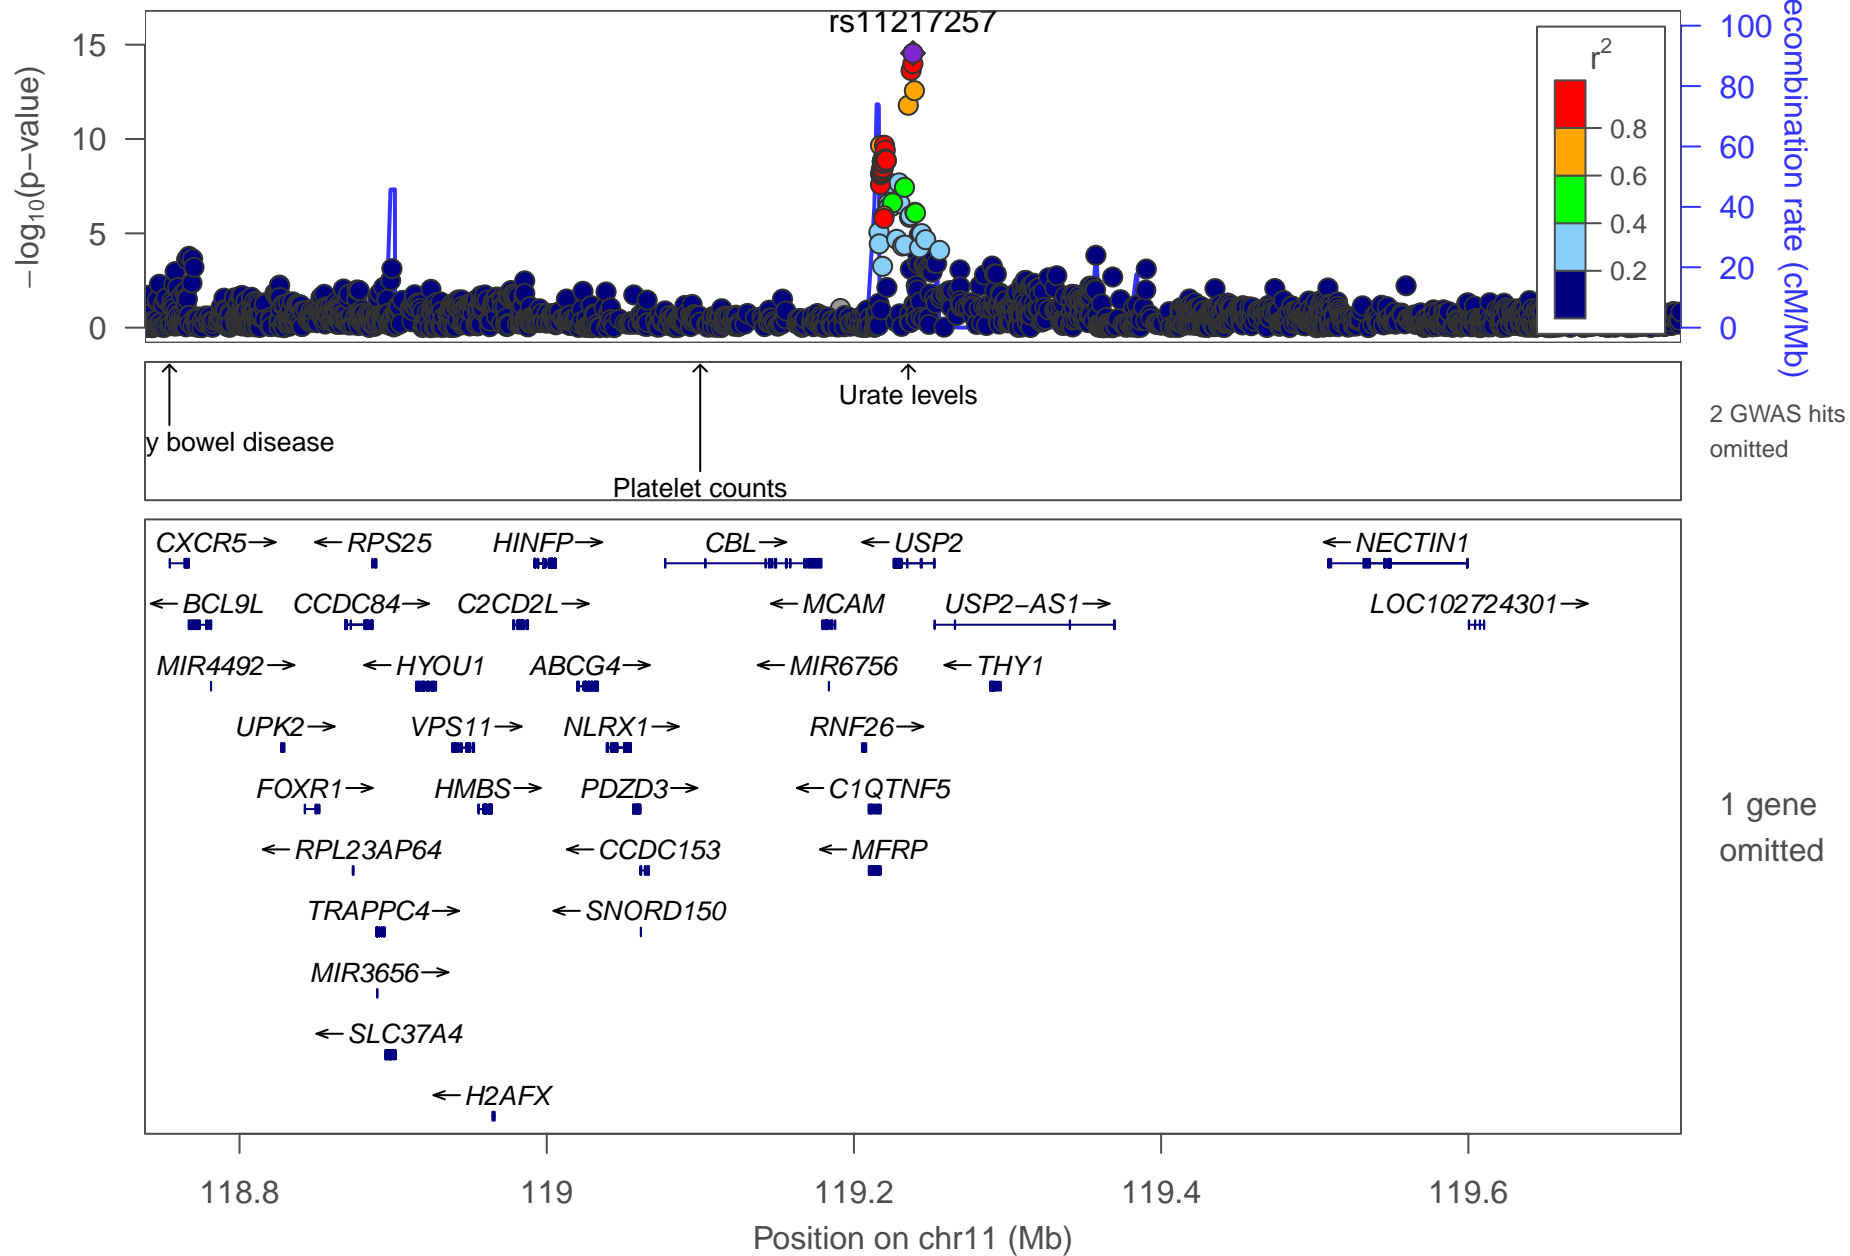

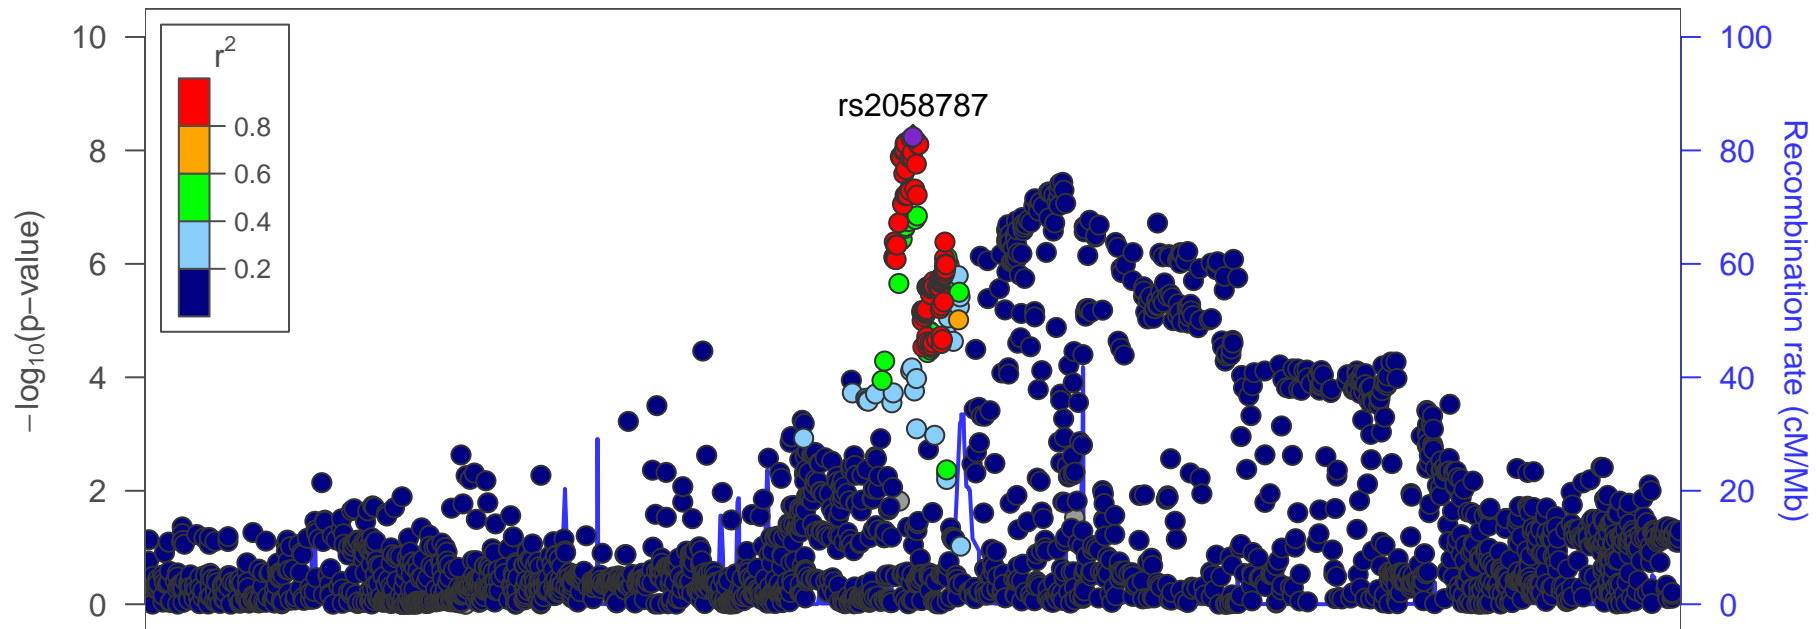

Pubertal anthropometrics ↑ Behavioural disinhibition (generation interaction) ↑

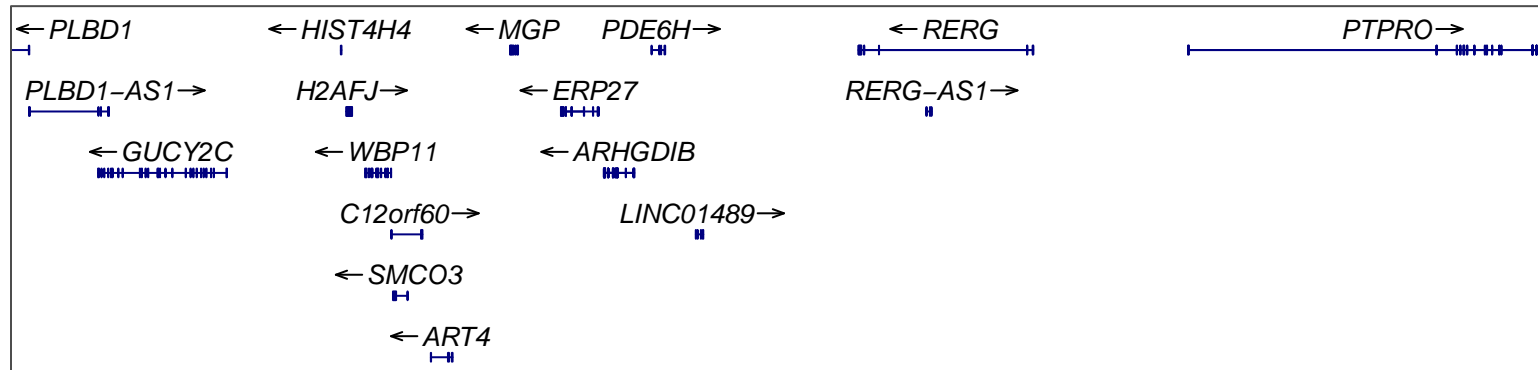

14.8 15 15.2 15.4 15.6  
Position on chr12 (Mb)

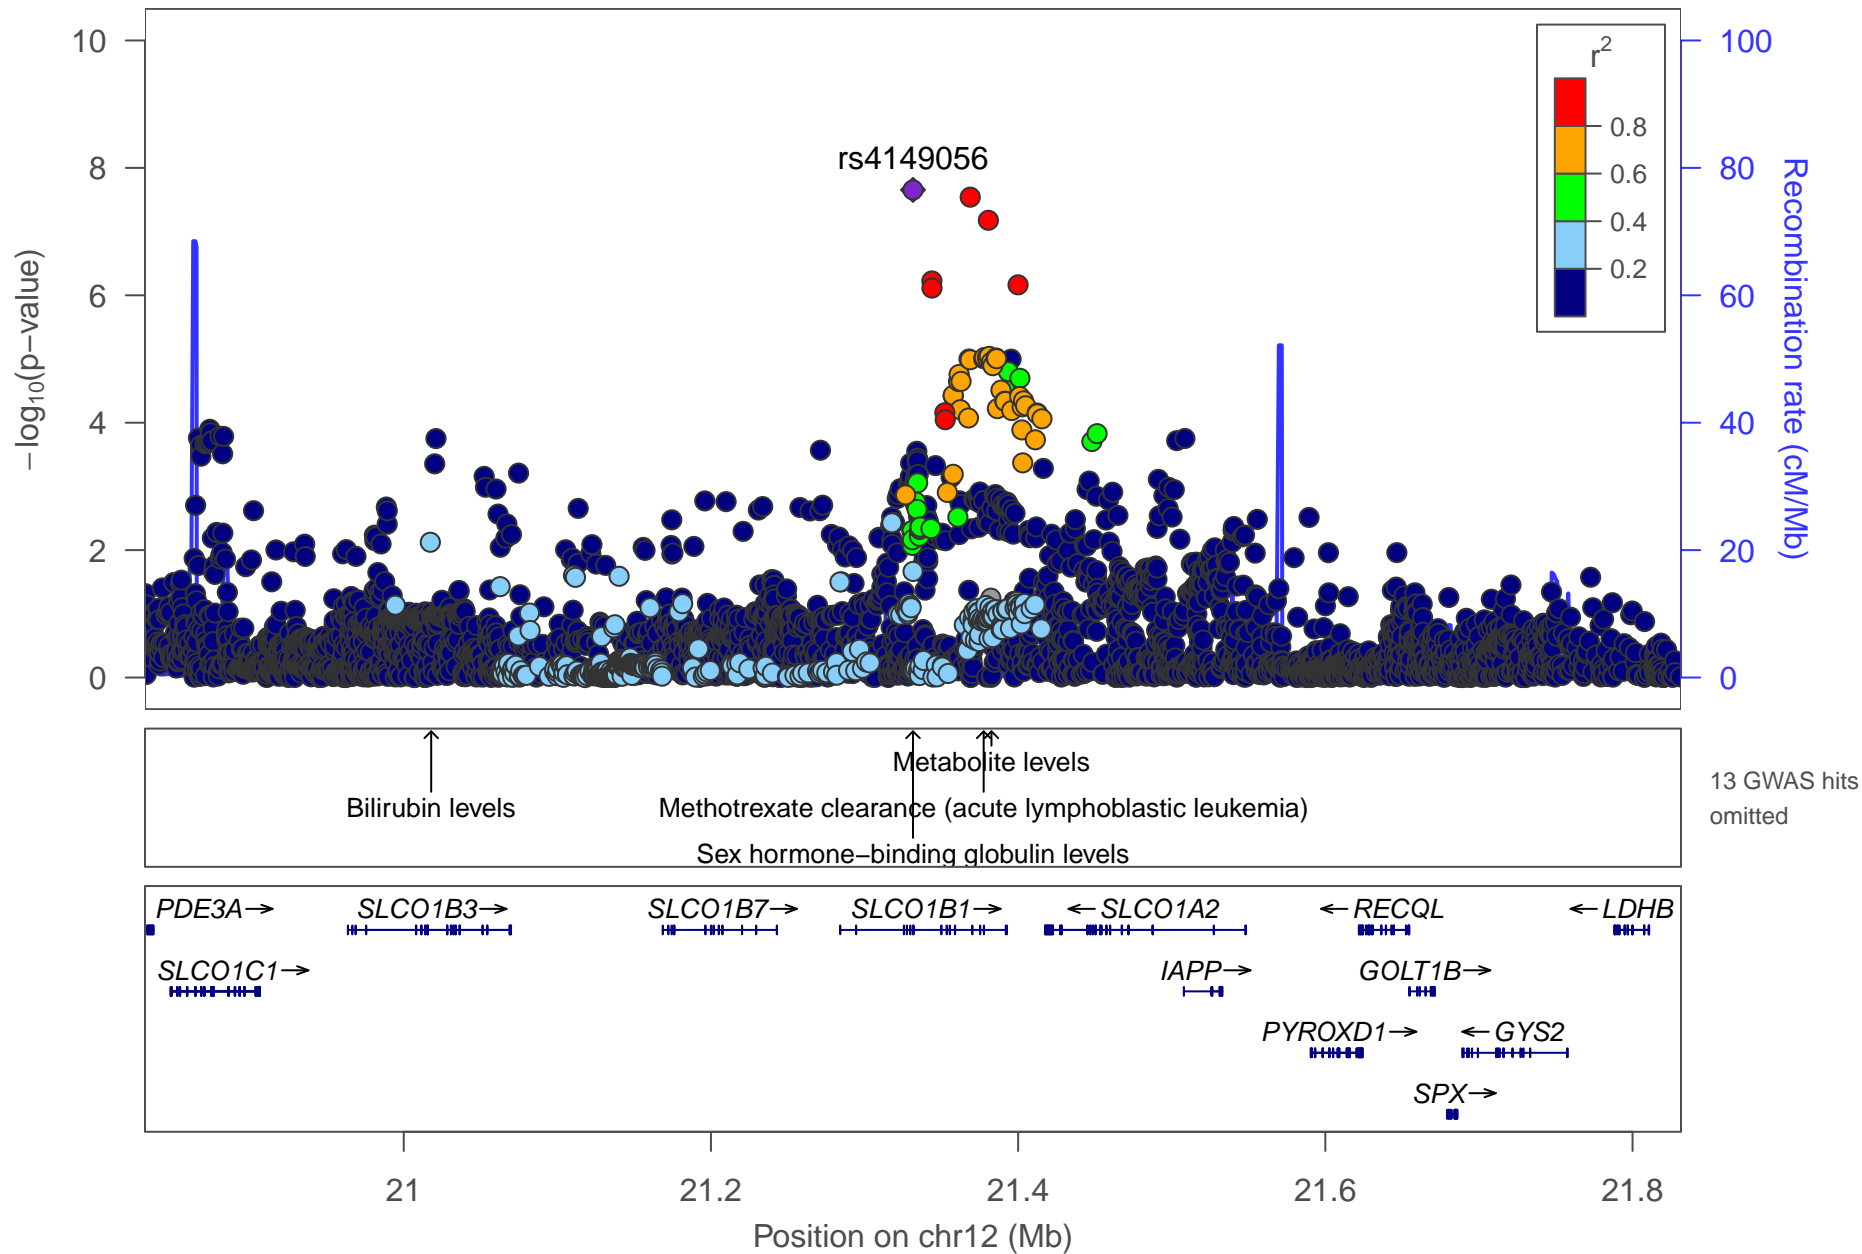

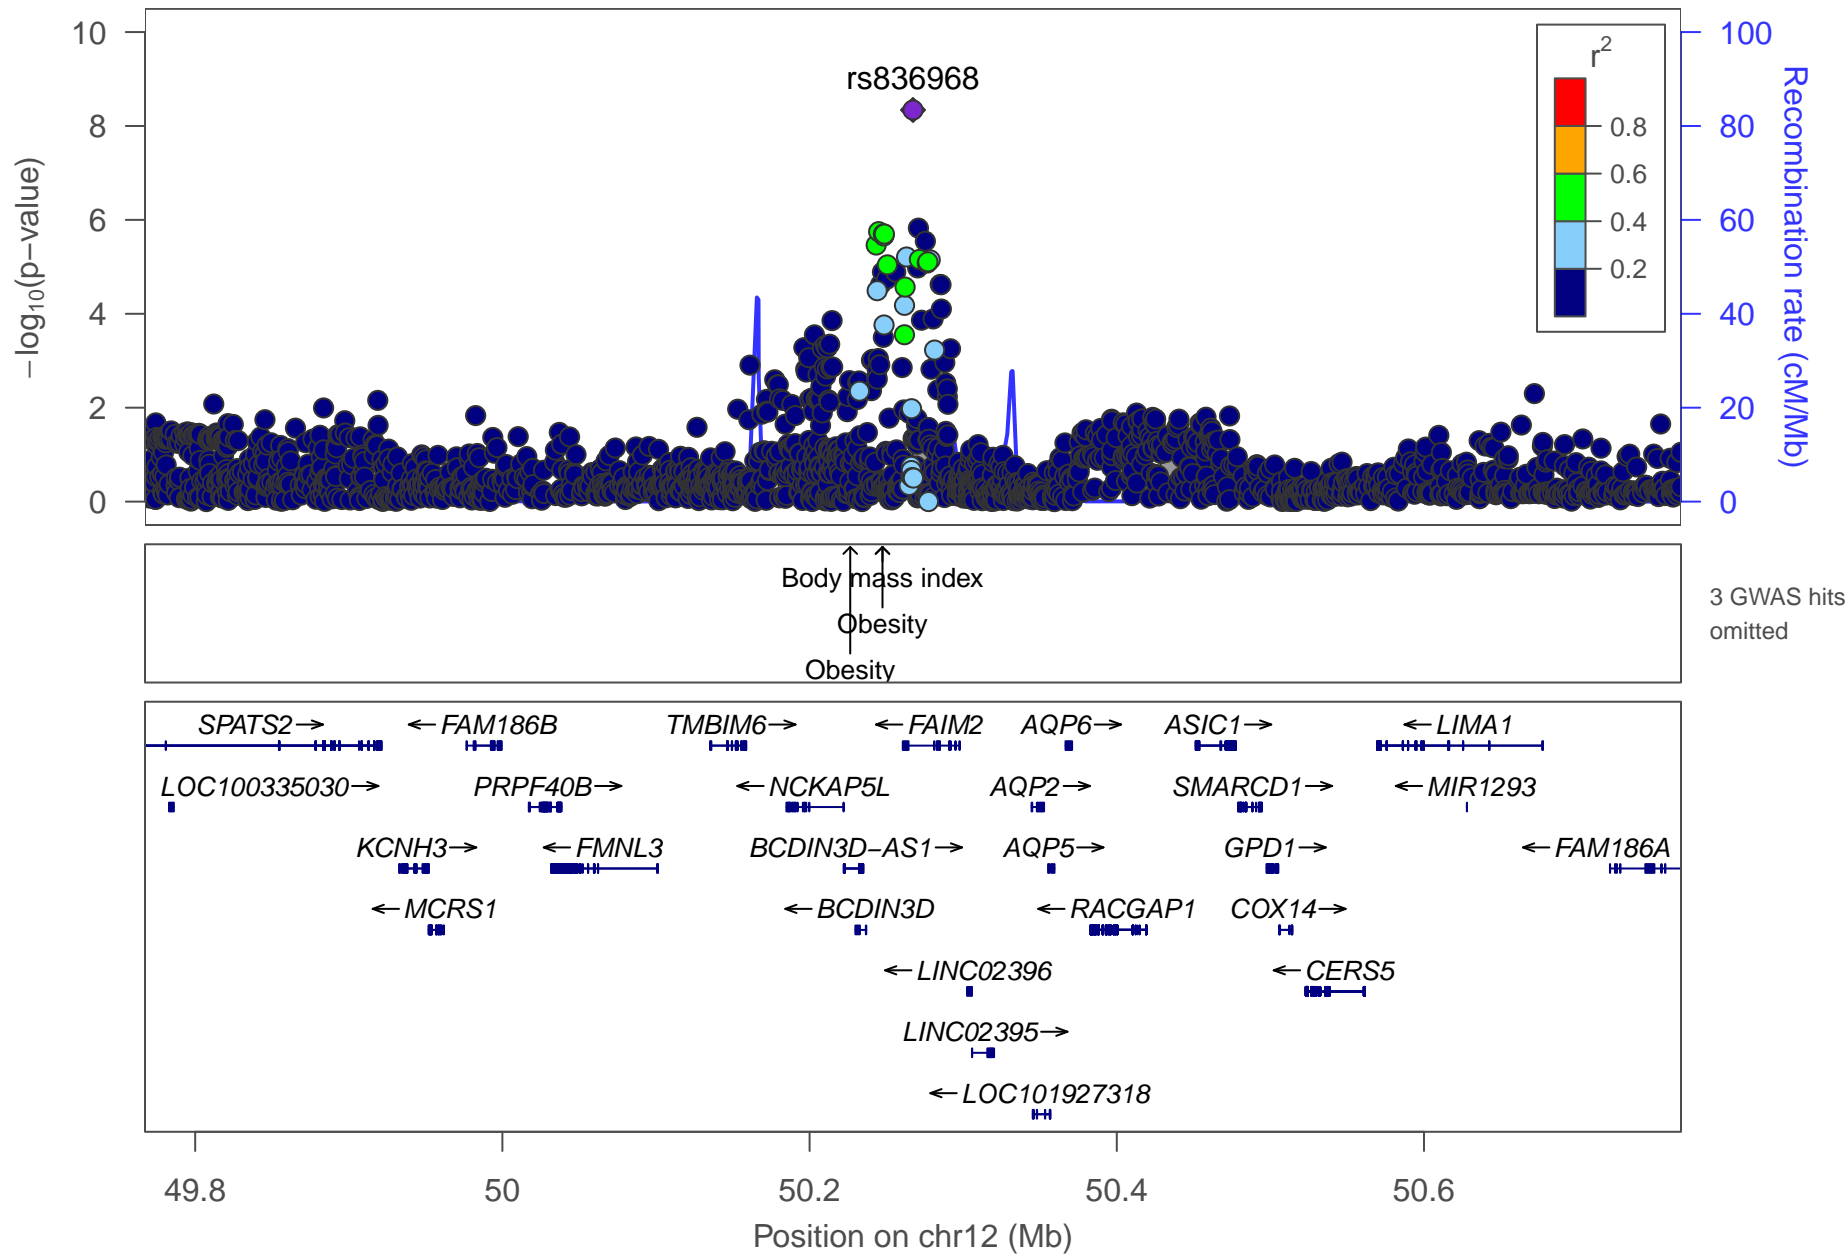



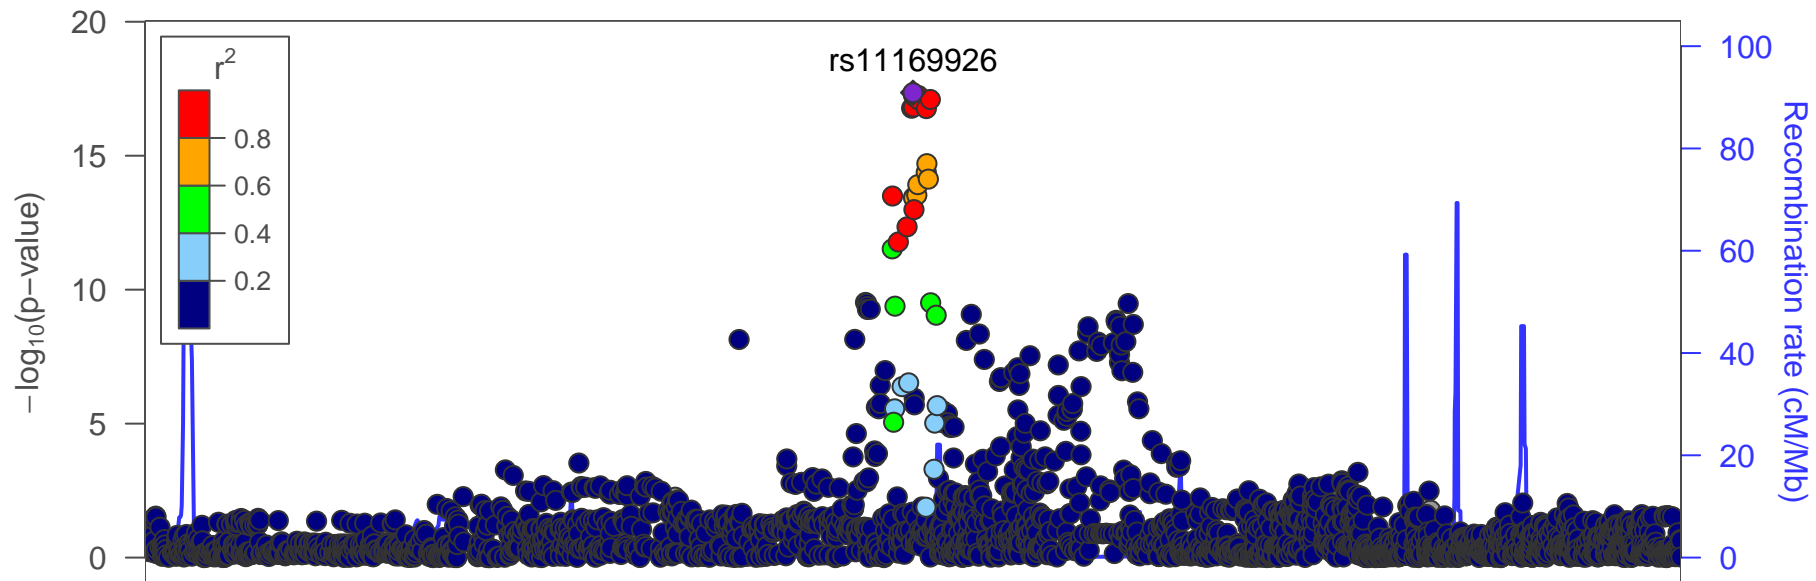

↑ Alzheimer's disease (cognitive decline)      ↑ Urate levels      ↑ Reasoning

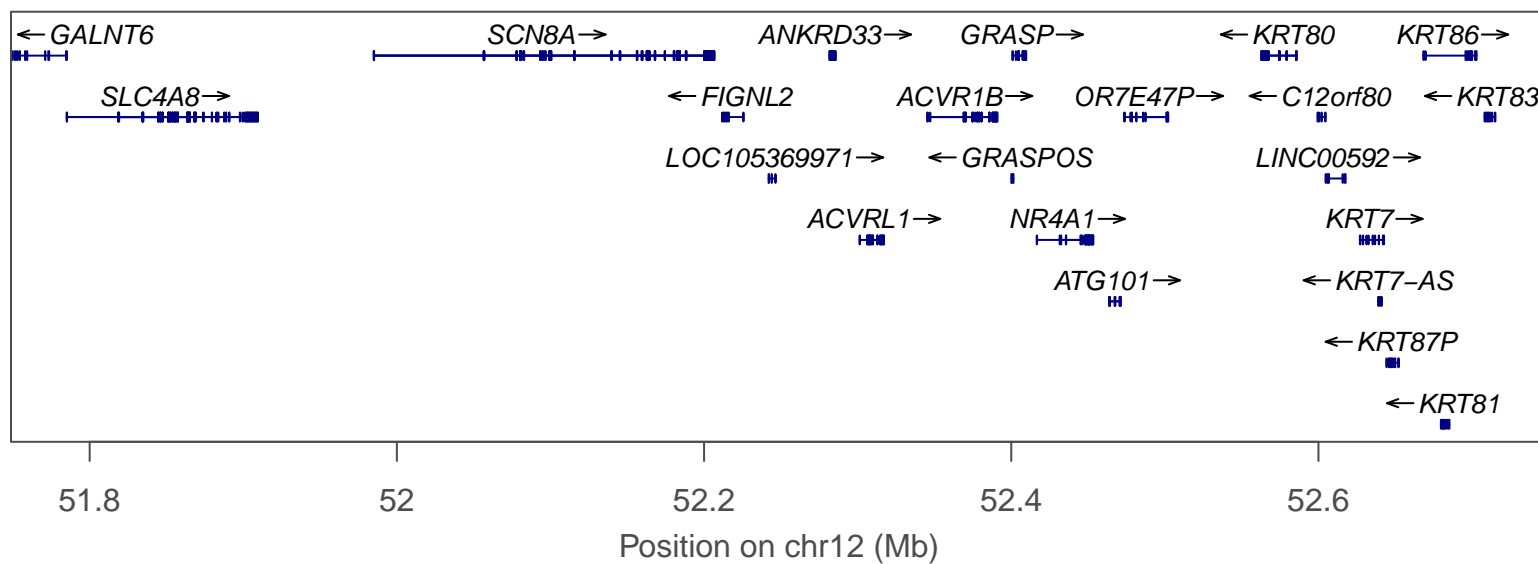



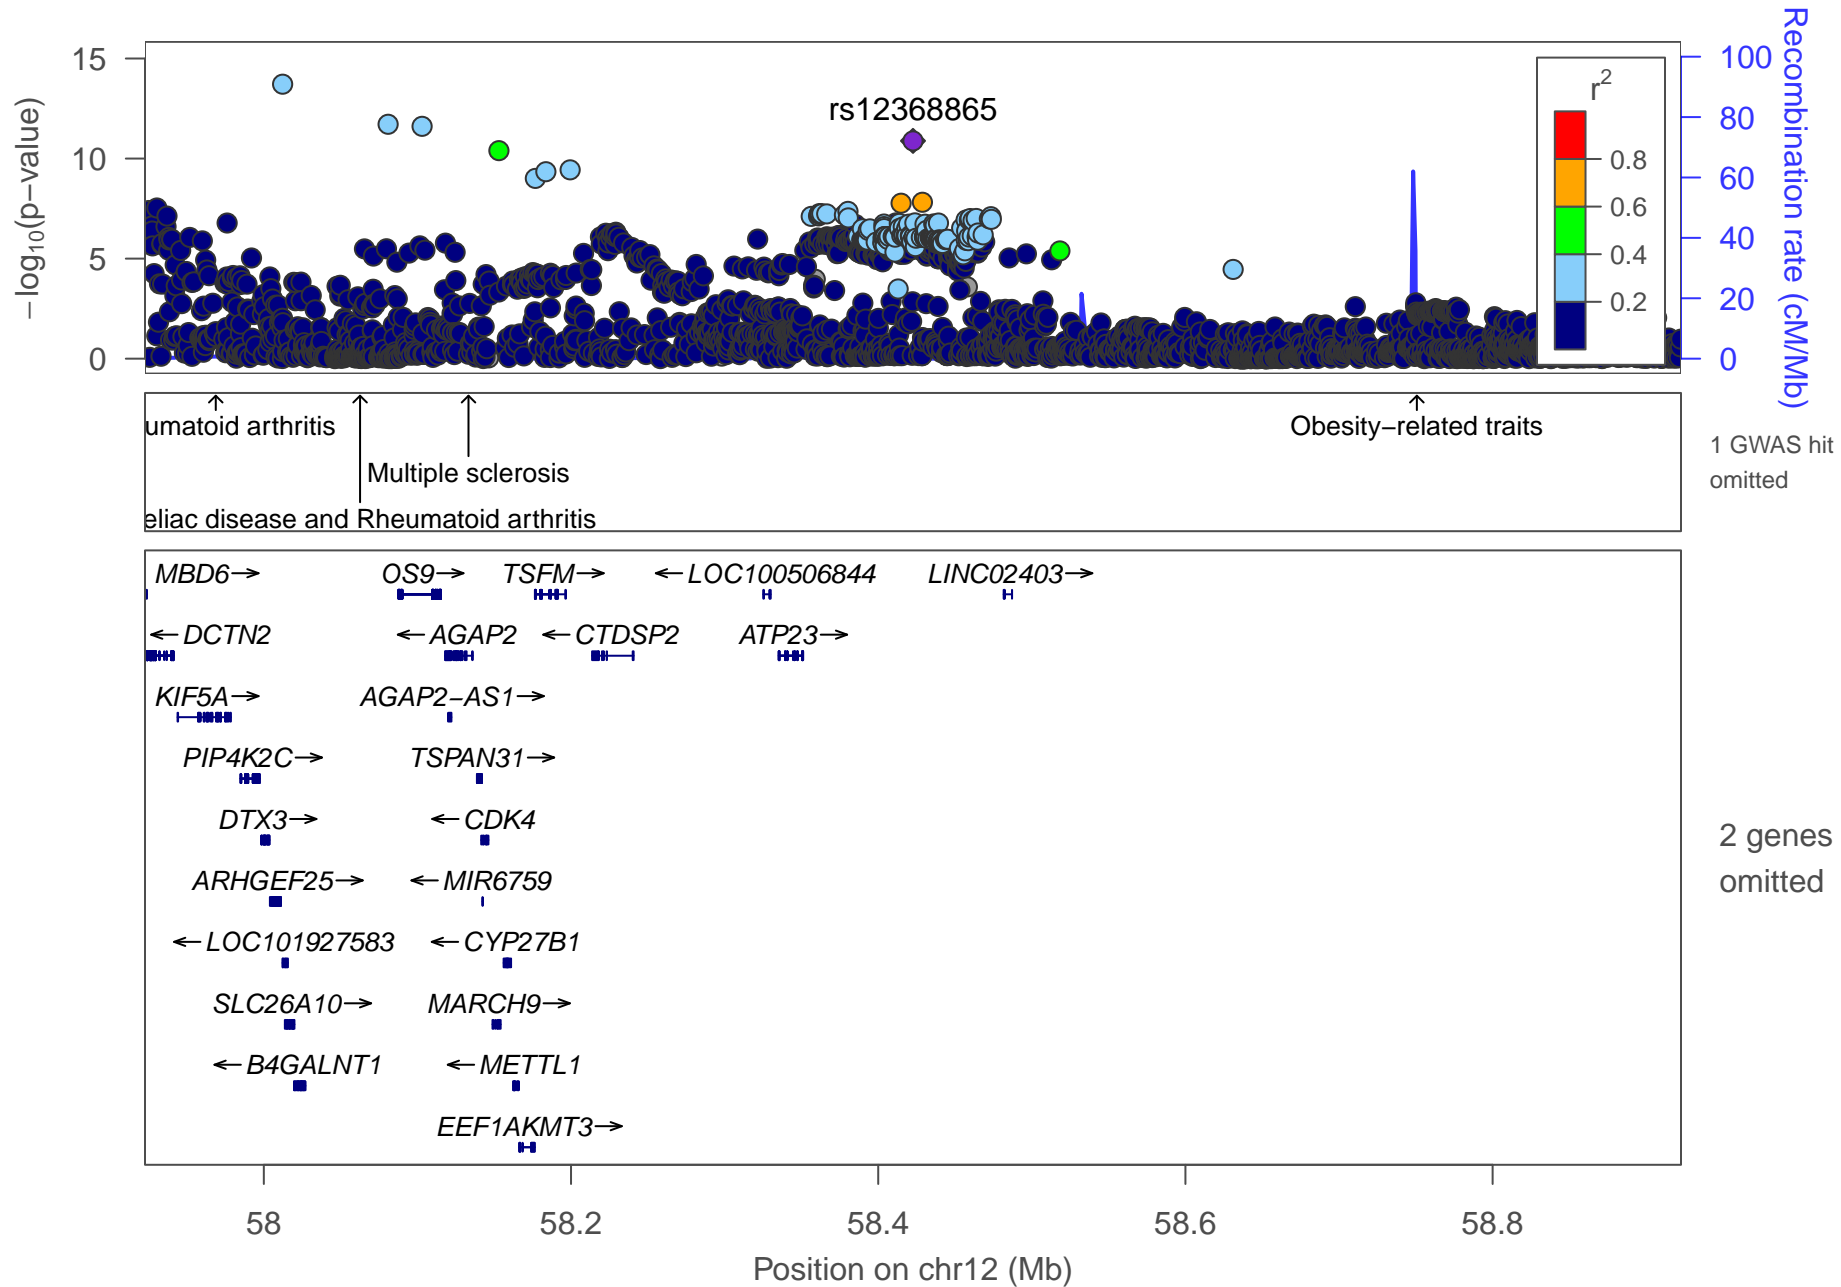

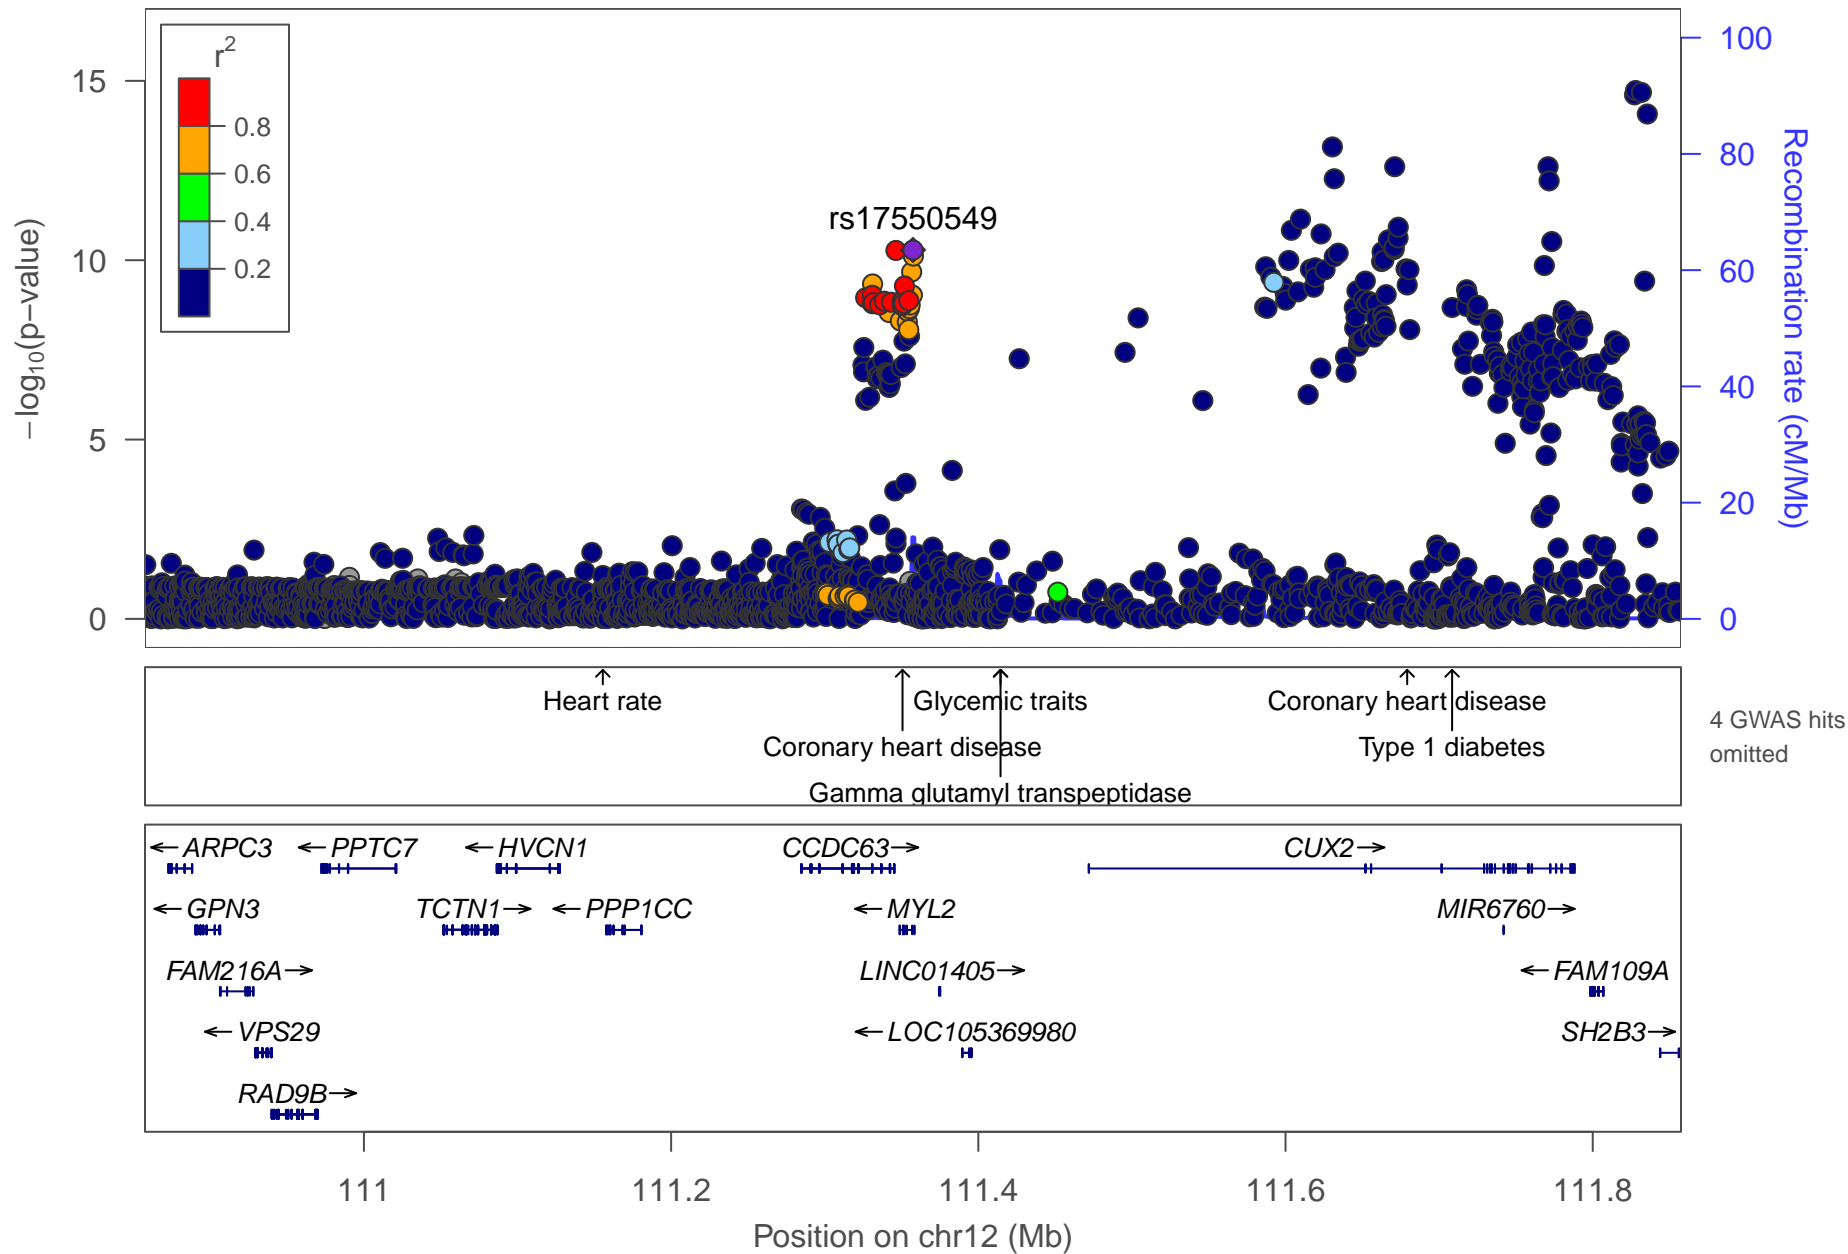

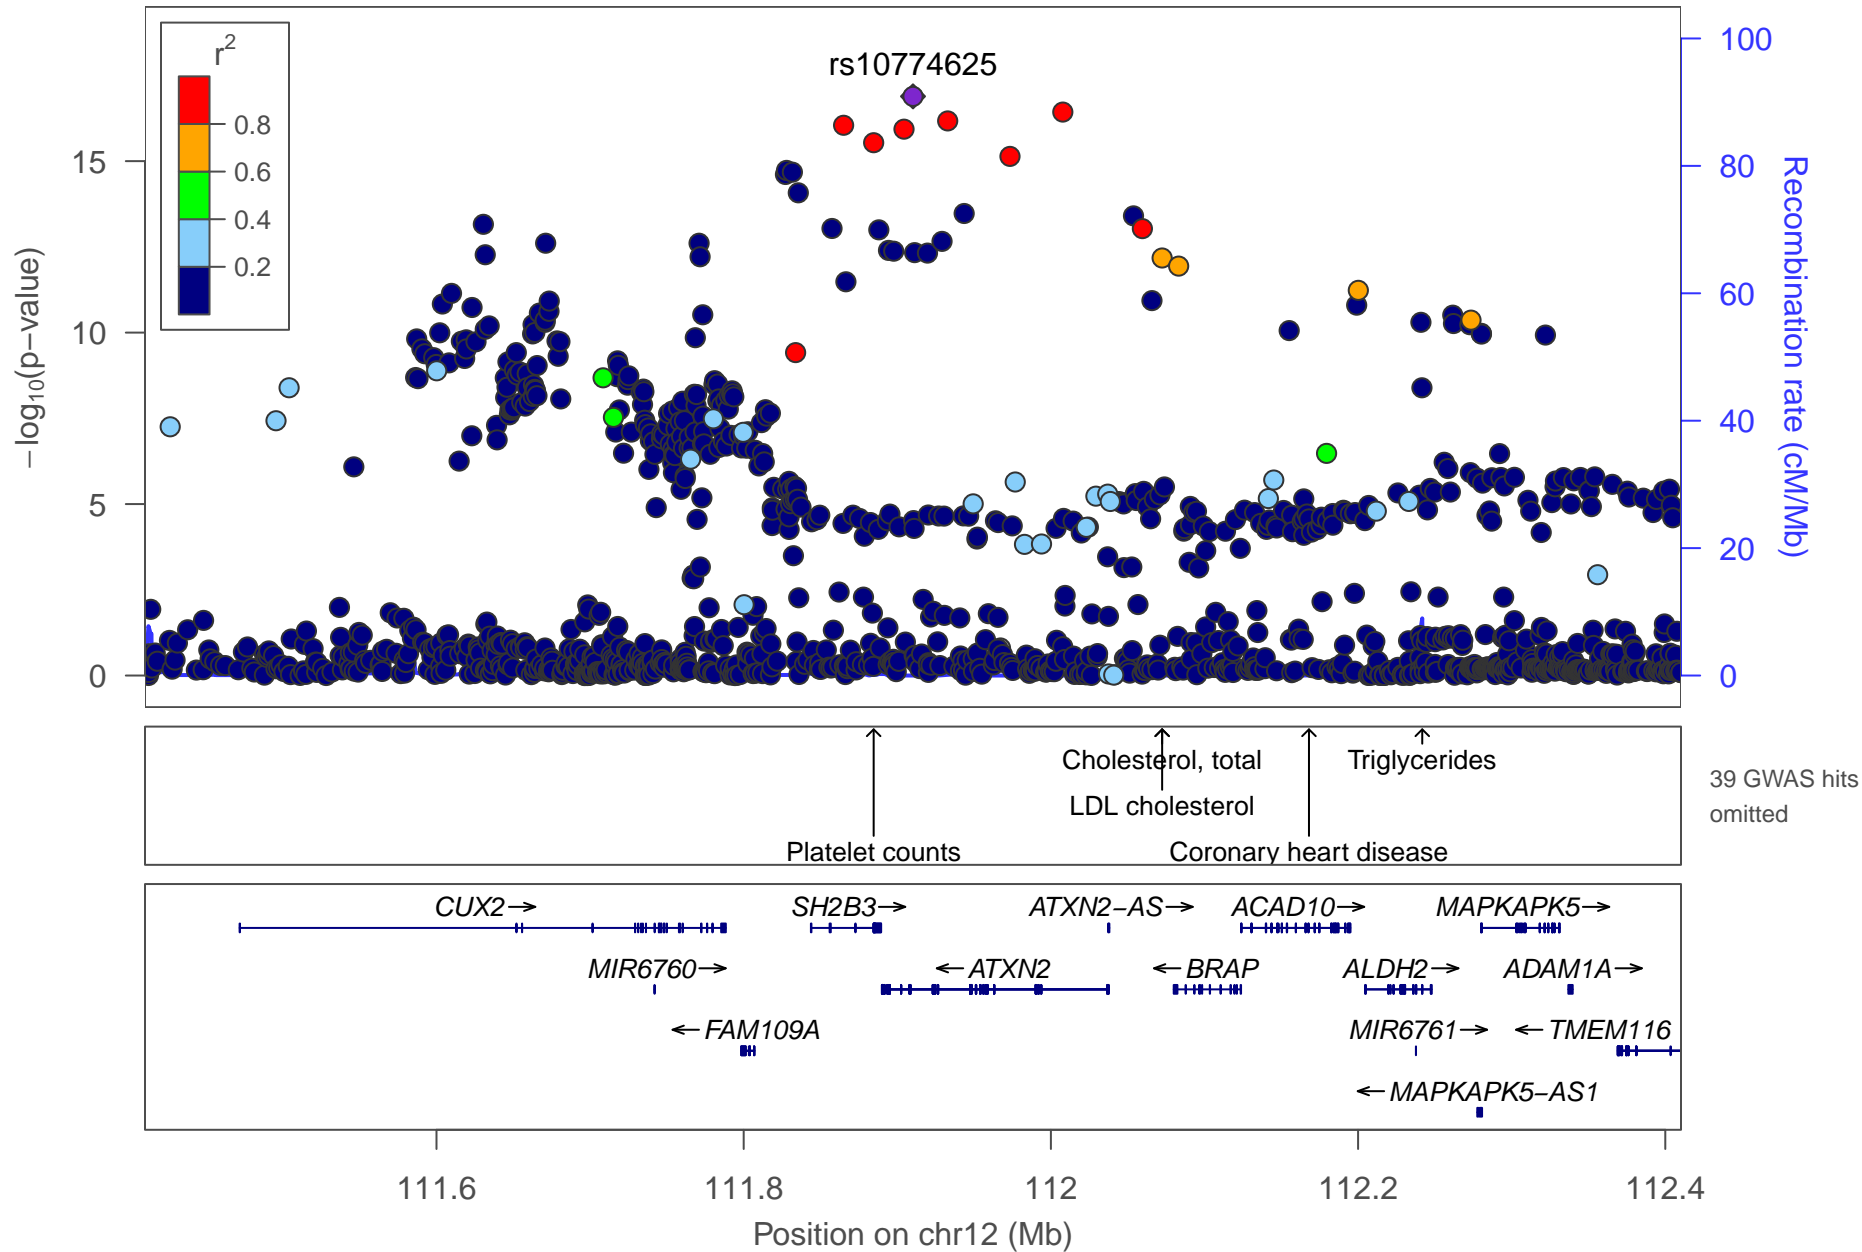

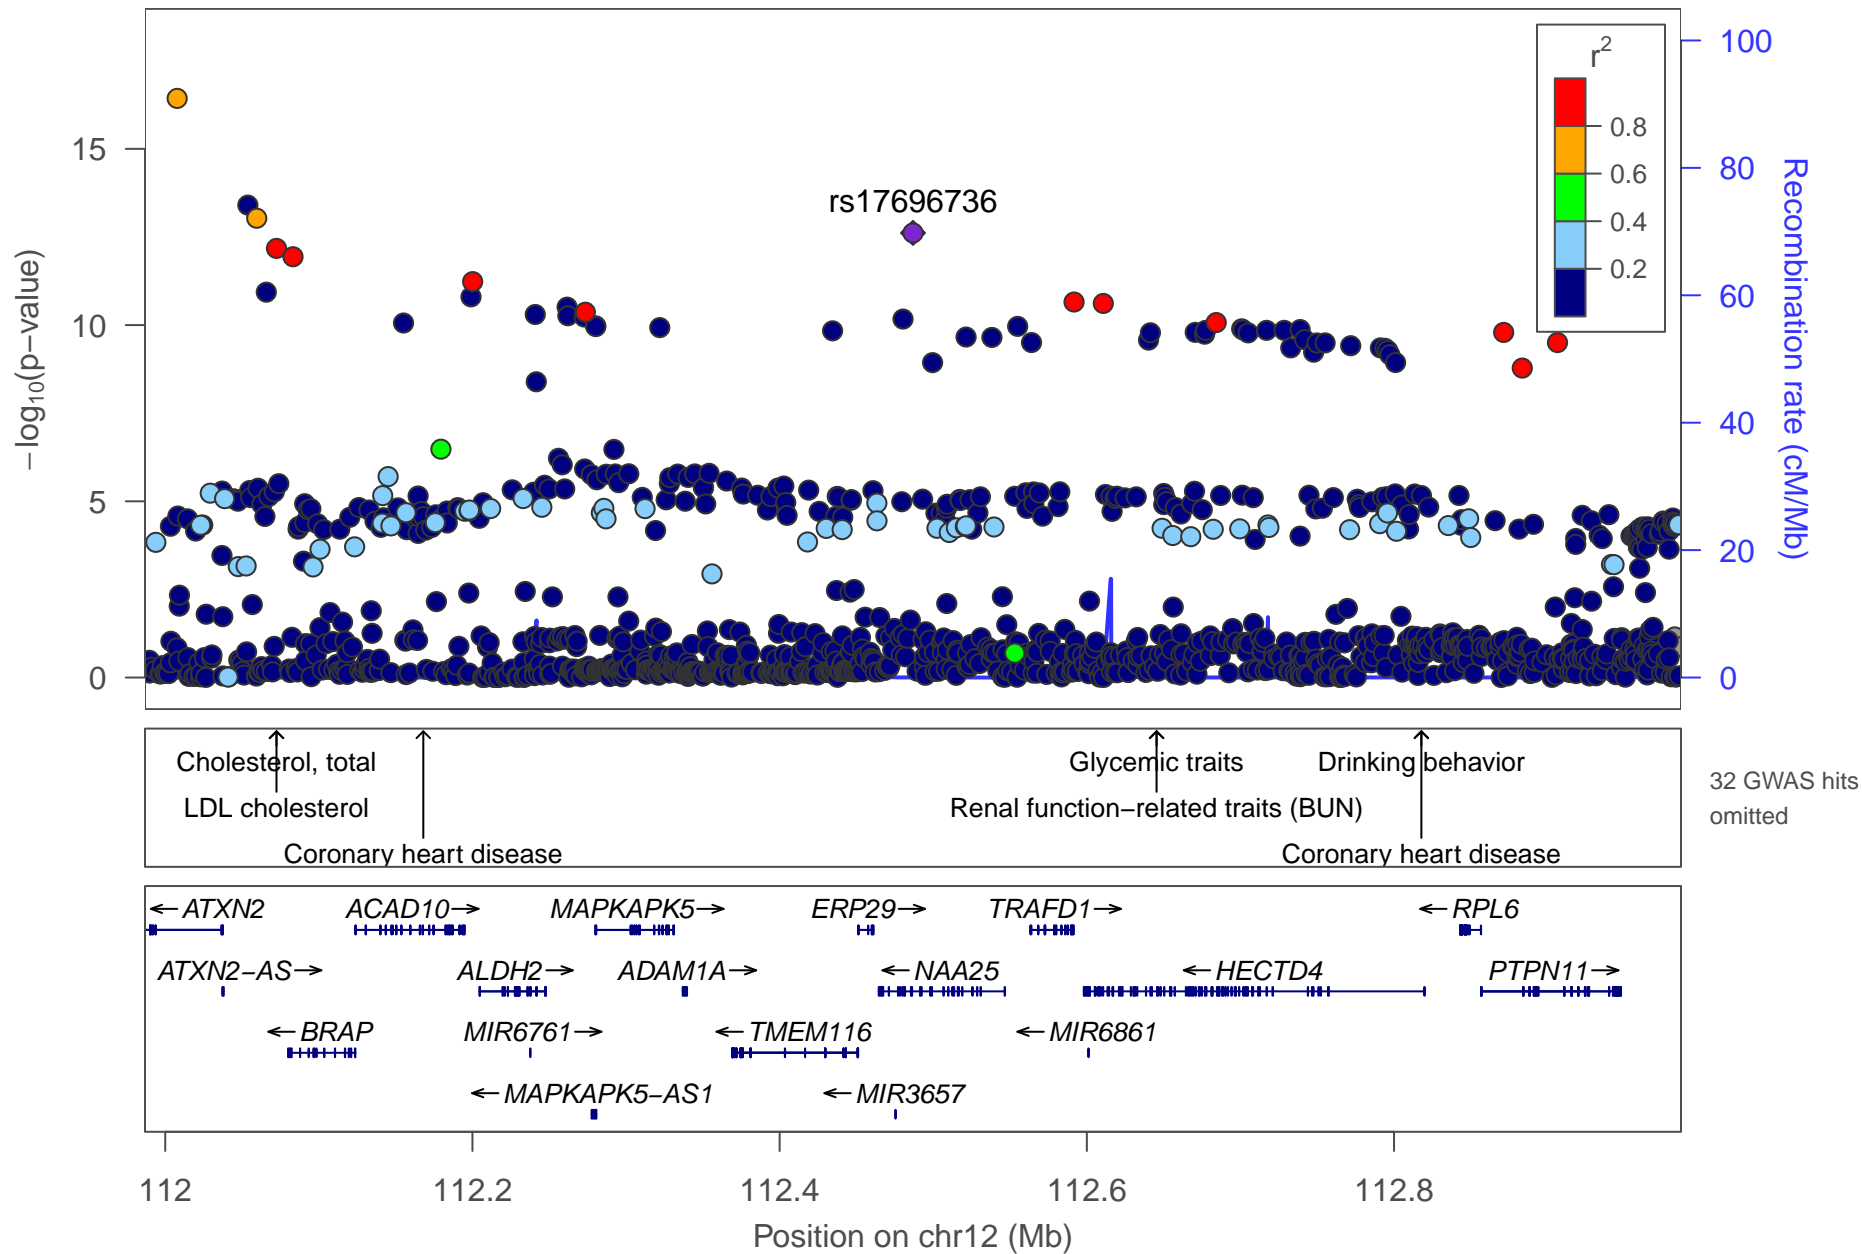



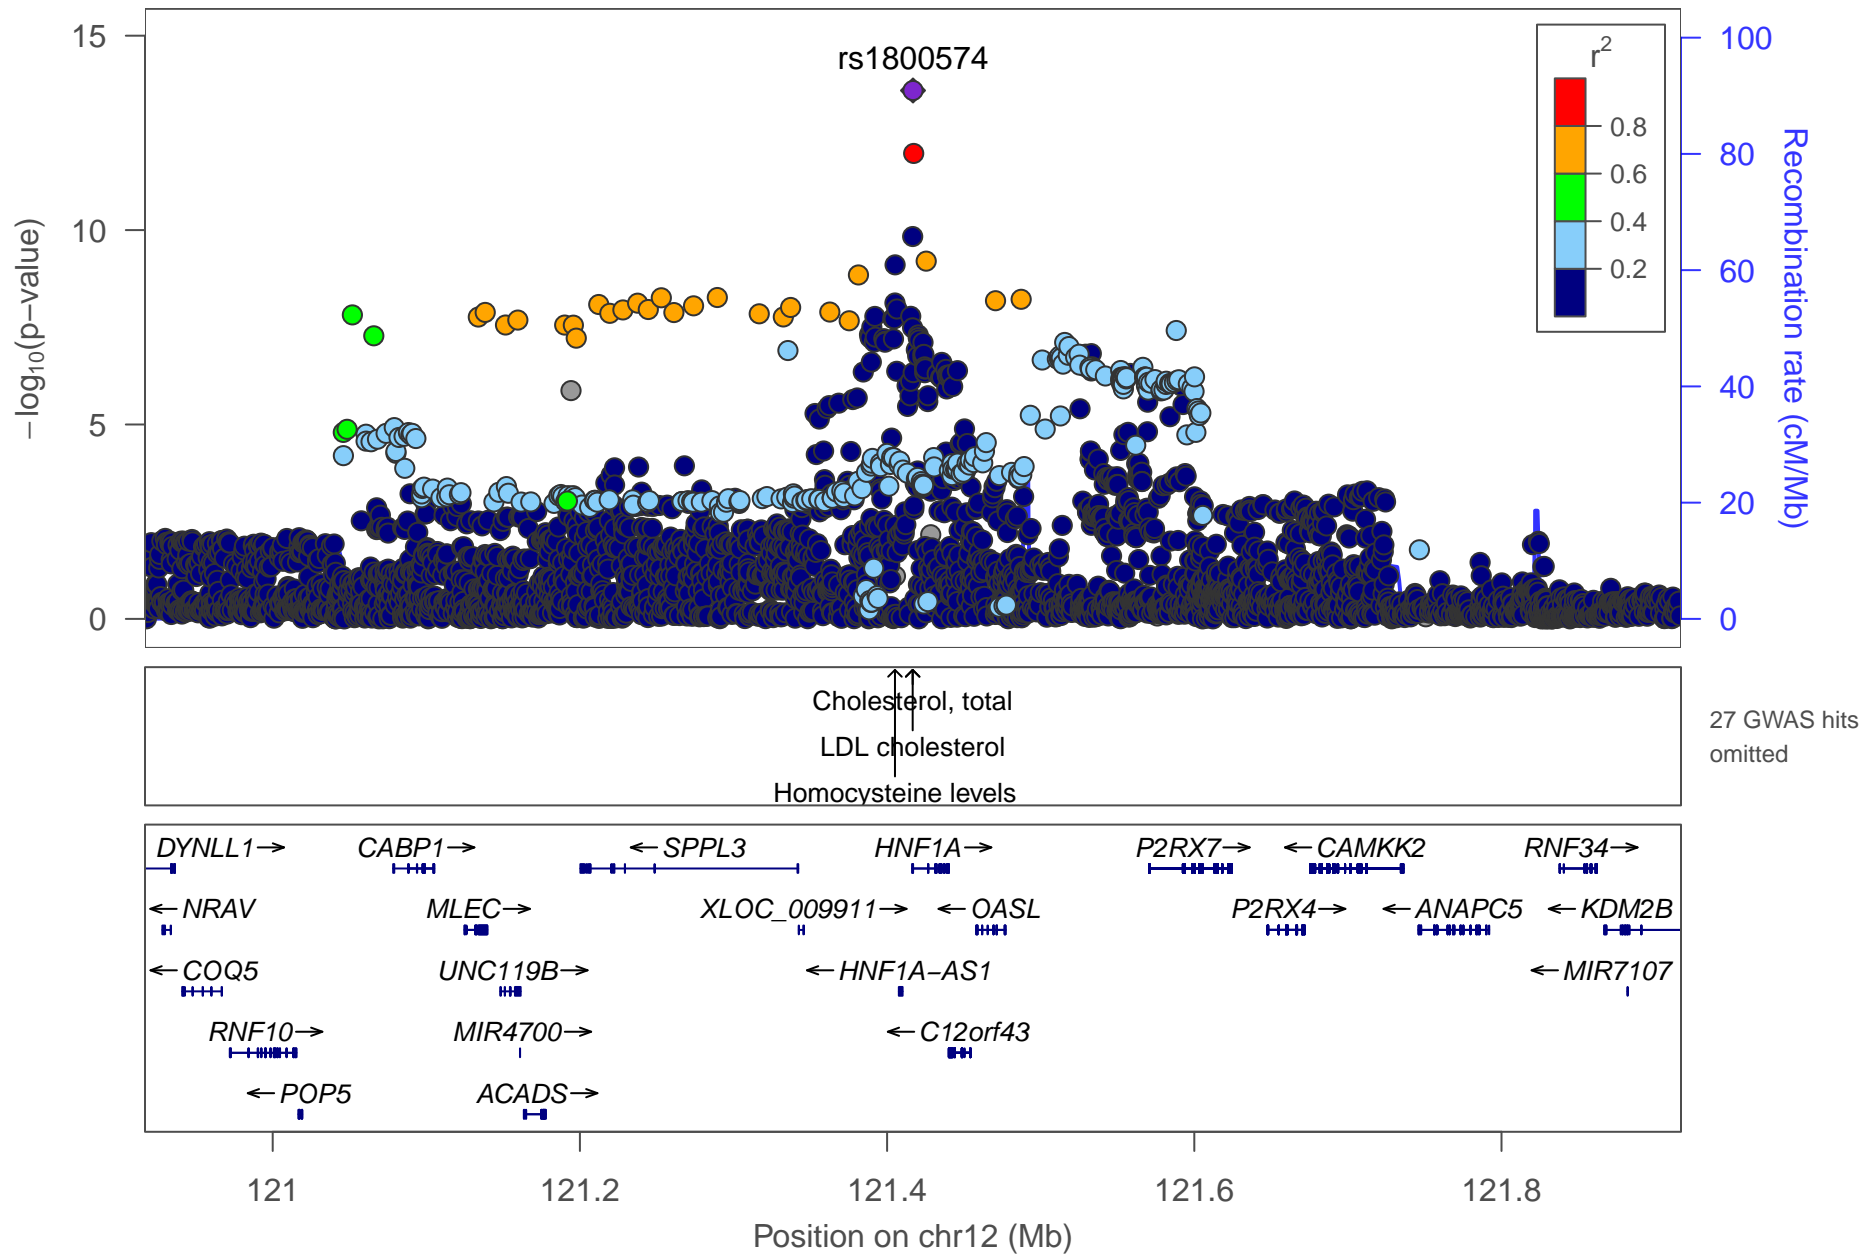





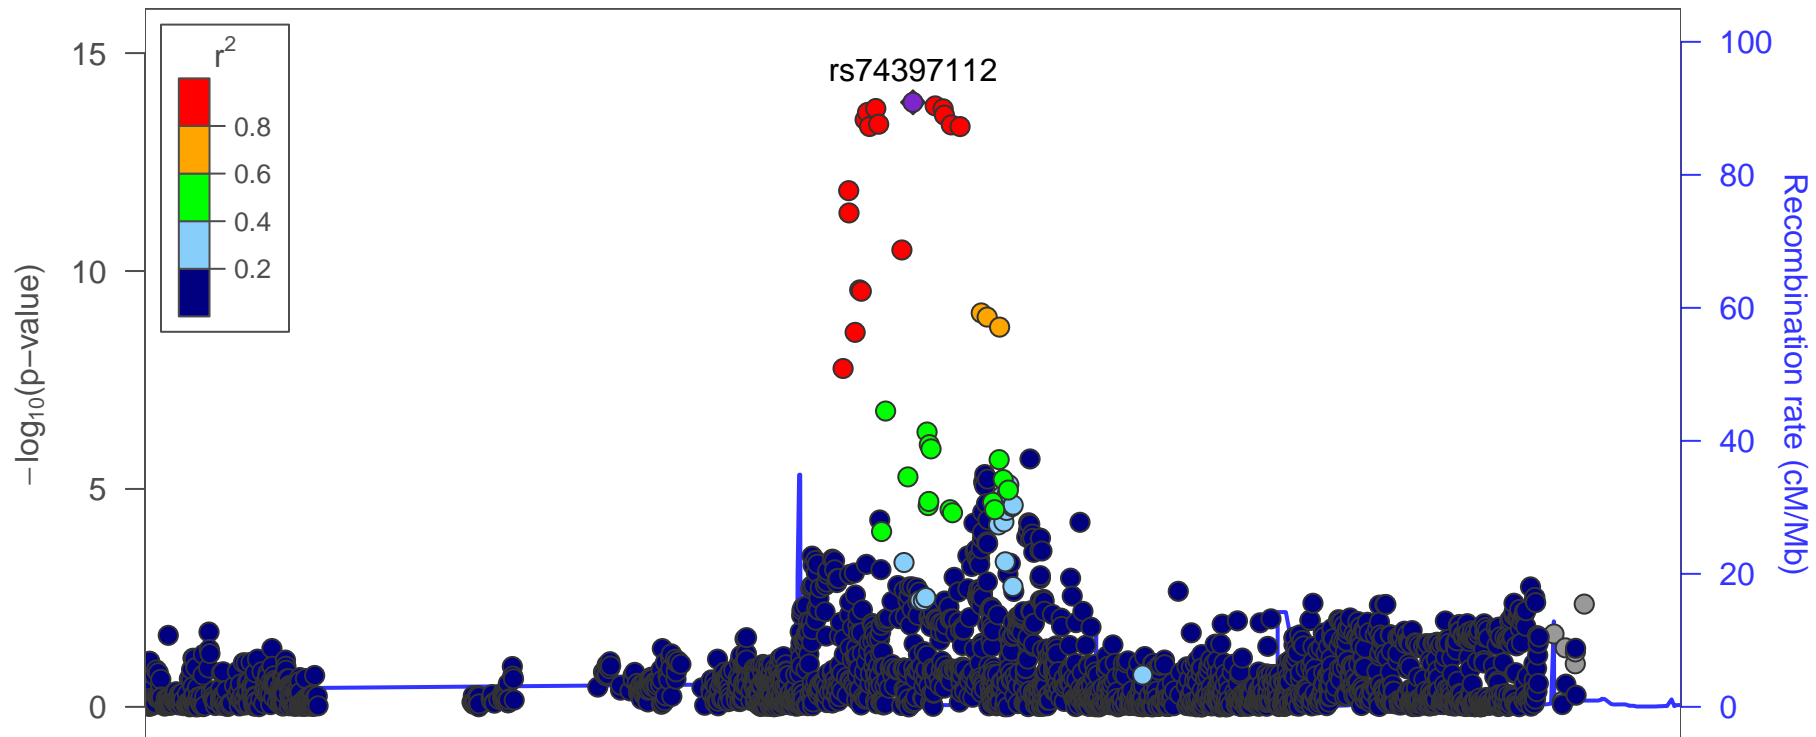

Immune response to smallpox vaccine (IL-6) ↑

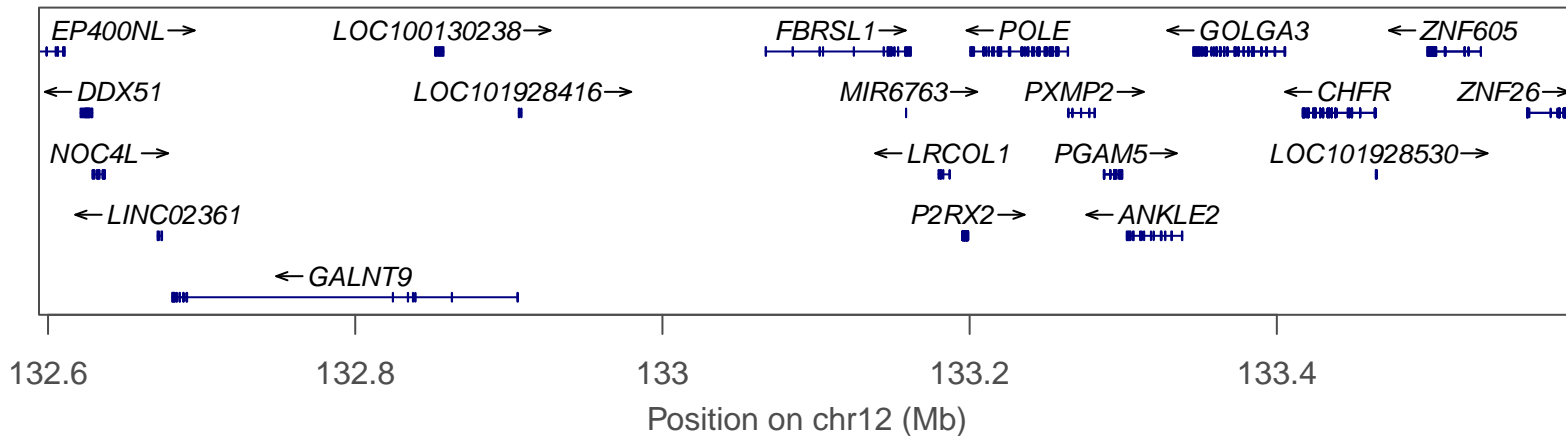

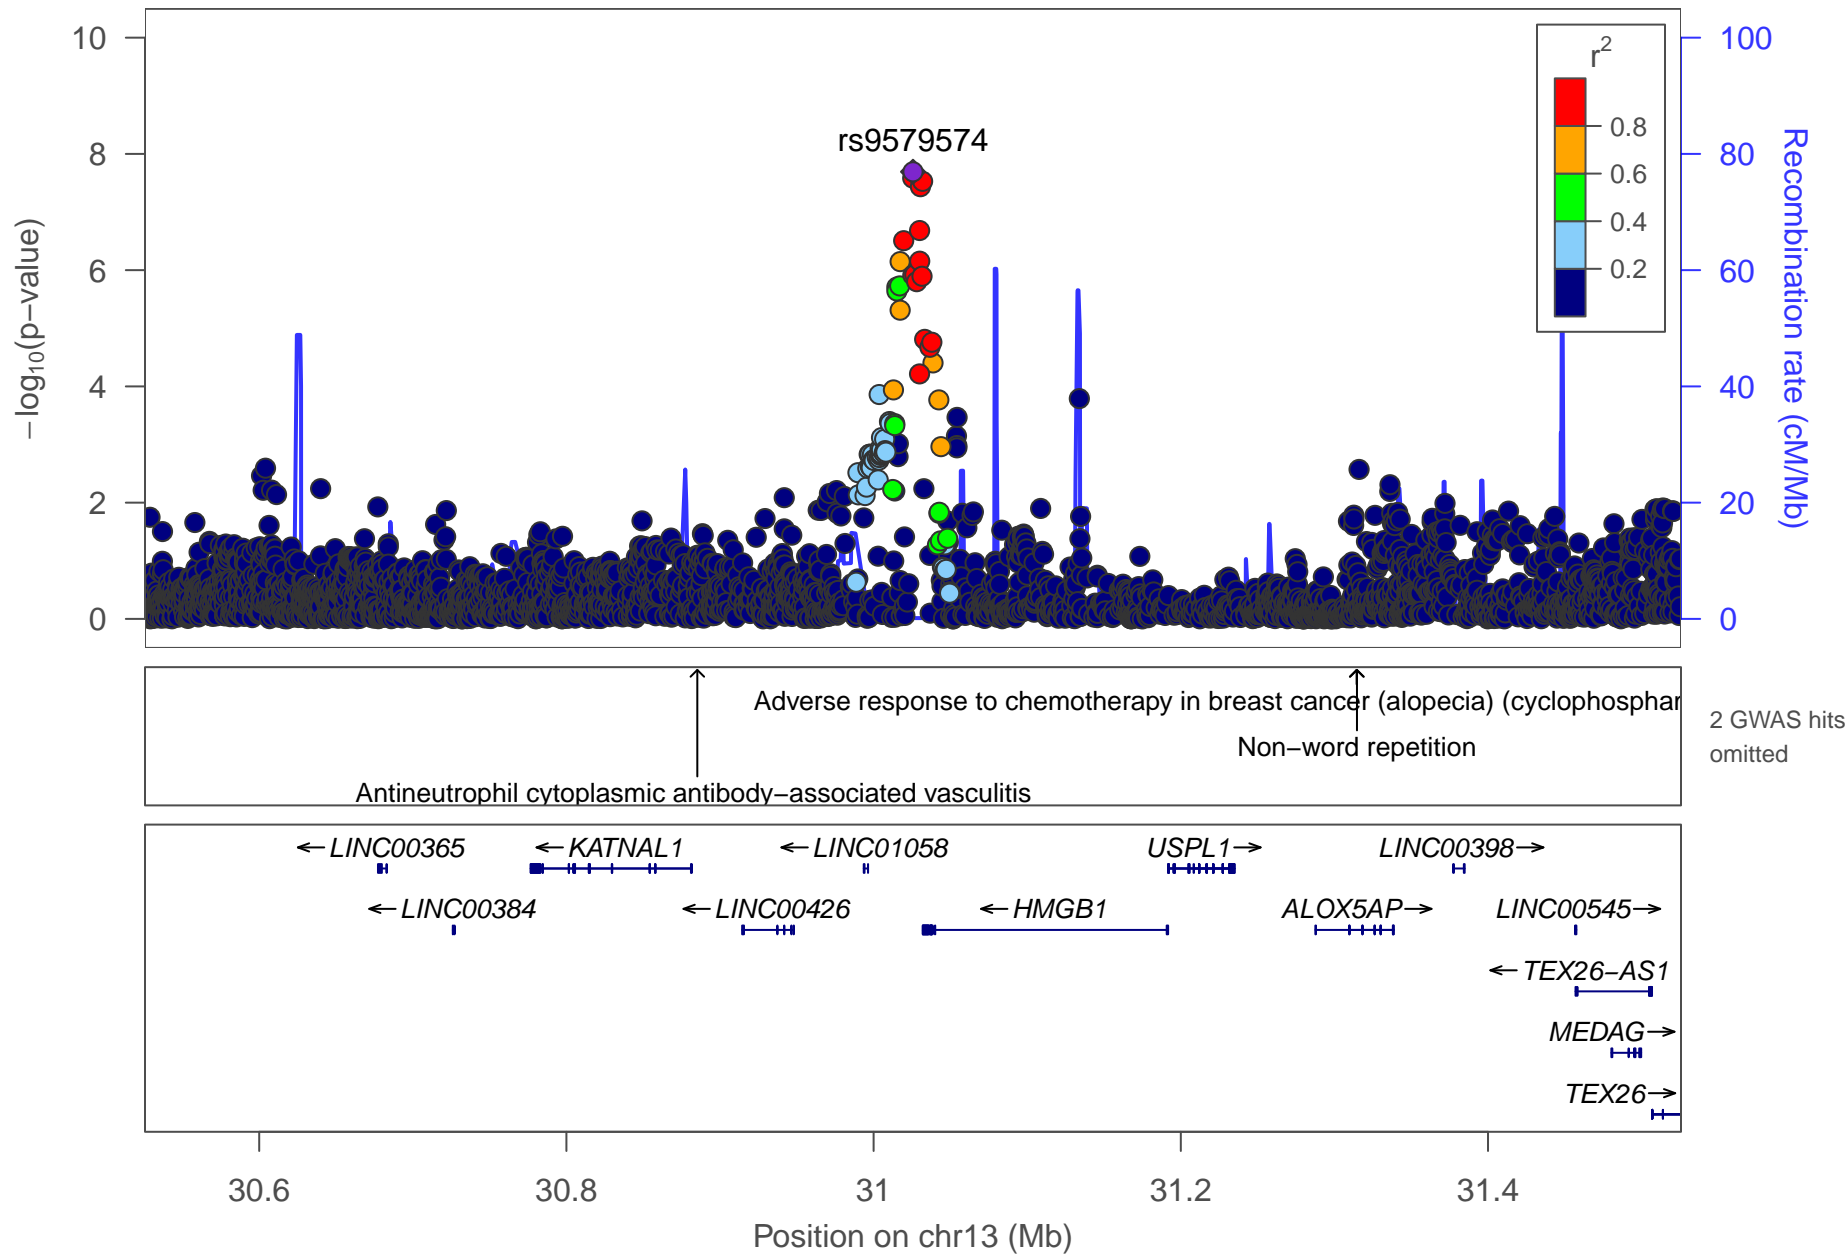

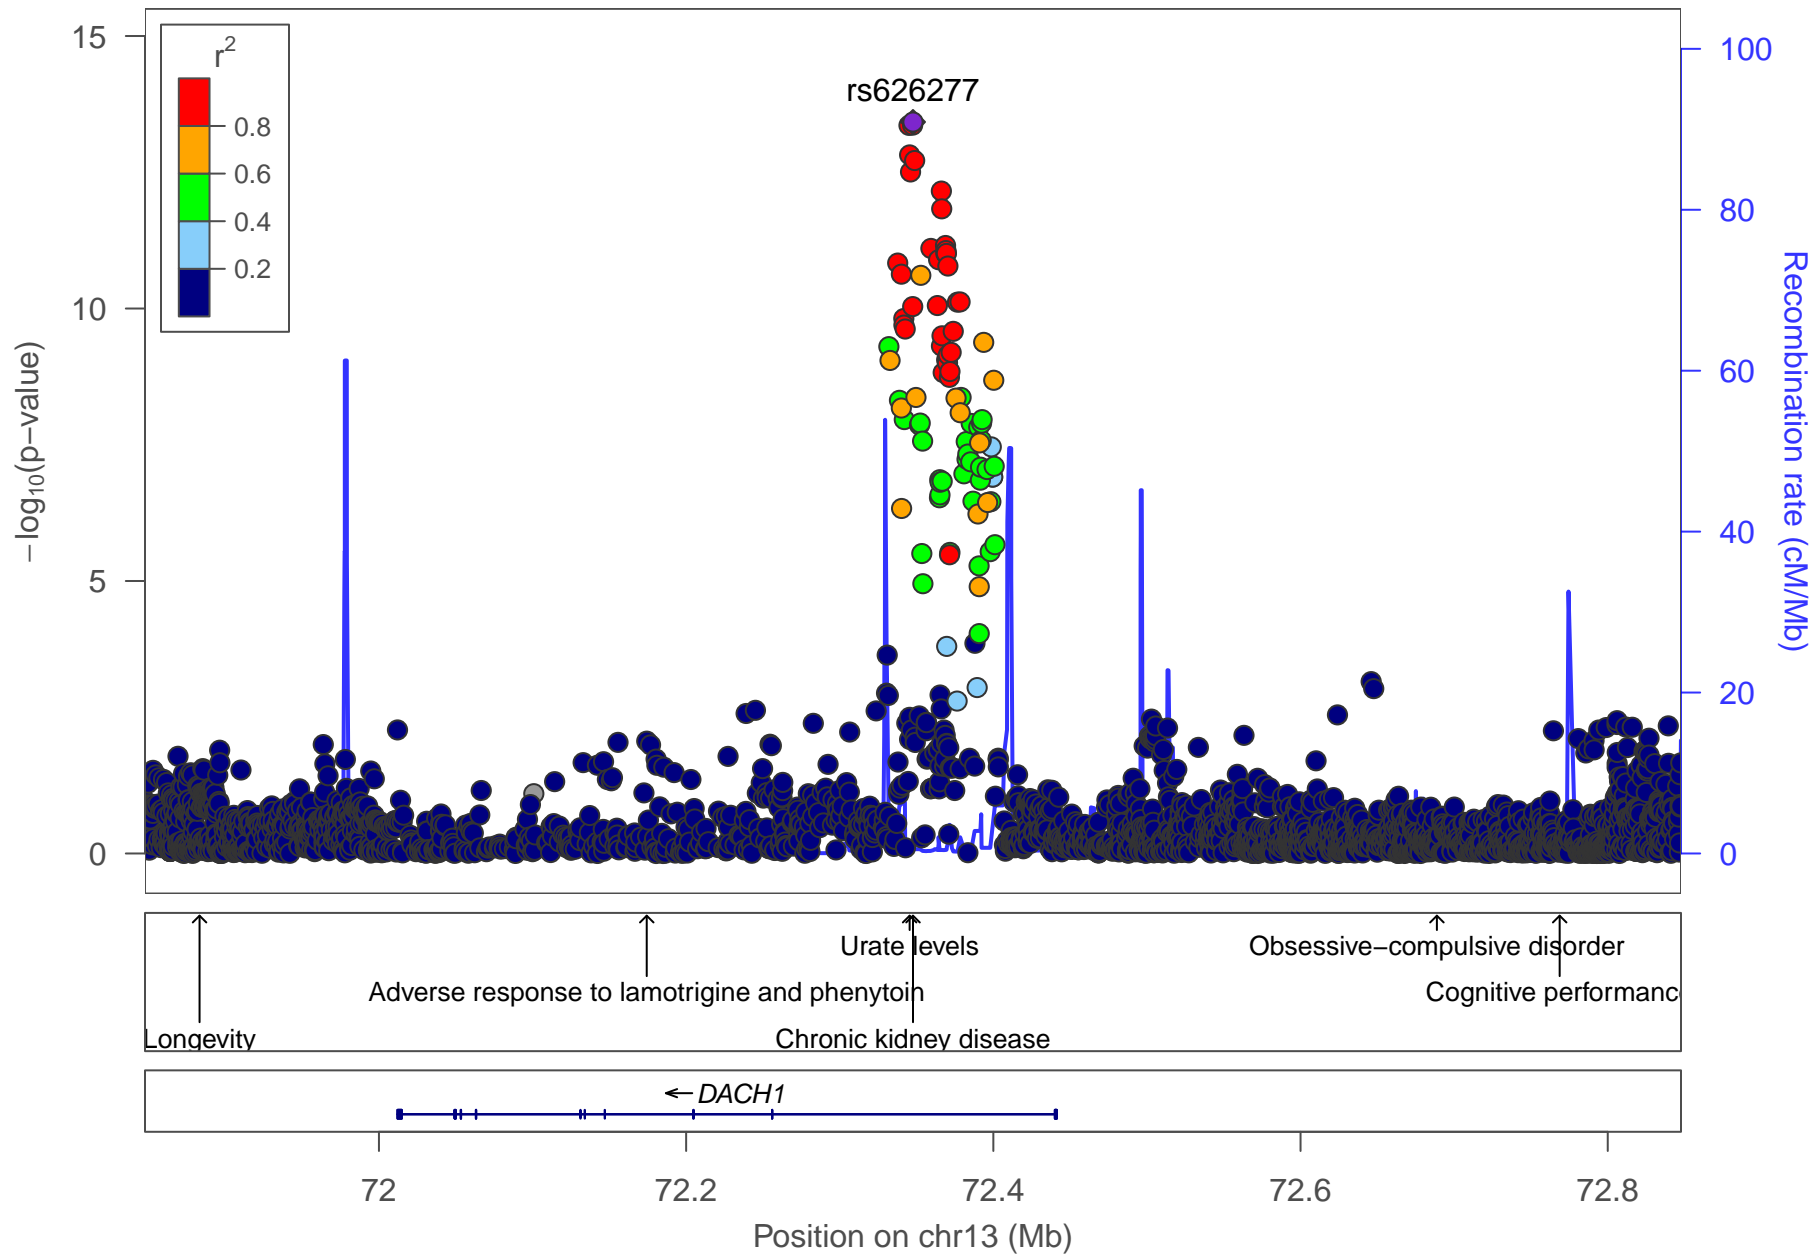

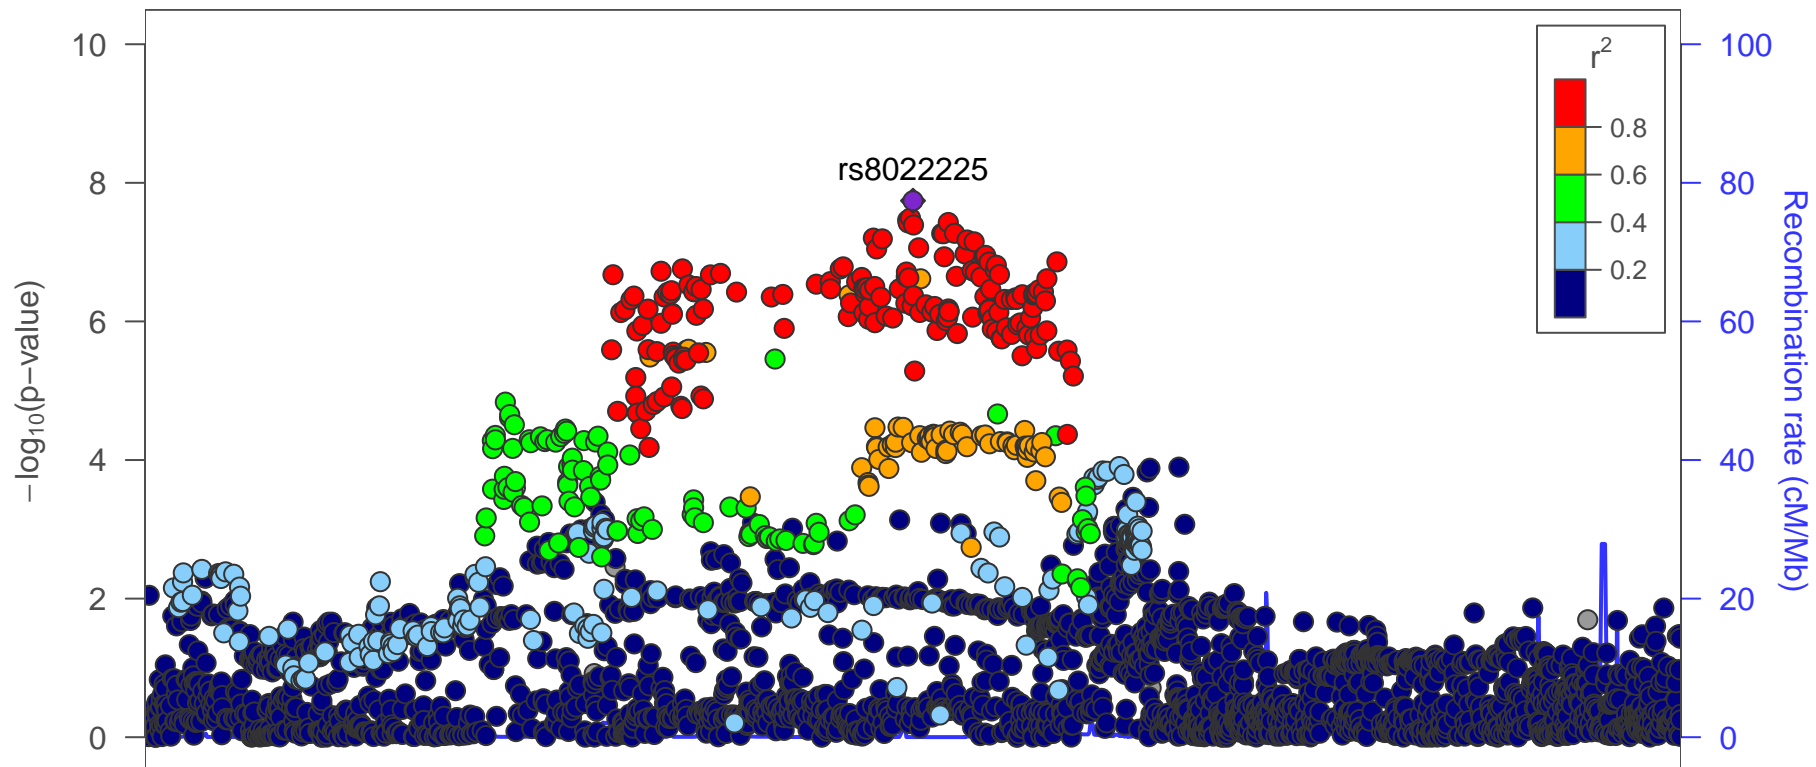

Obesity-related traits  
 Rheumatoid arthritis  
 Protein biomarker  
 Adverse response to chemotherapy (neutropenia/

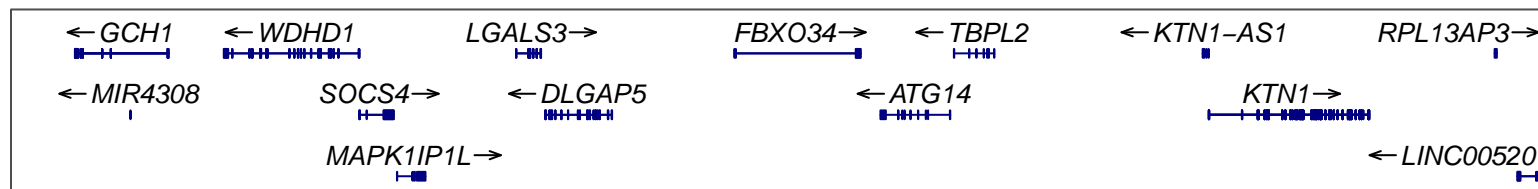

55.4 55.6 55.8 56 56.2

Position on chr14 (Mb)

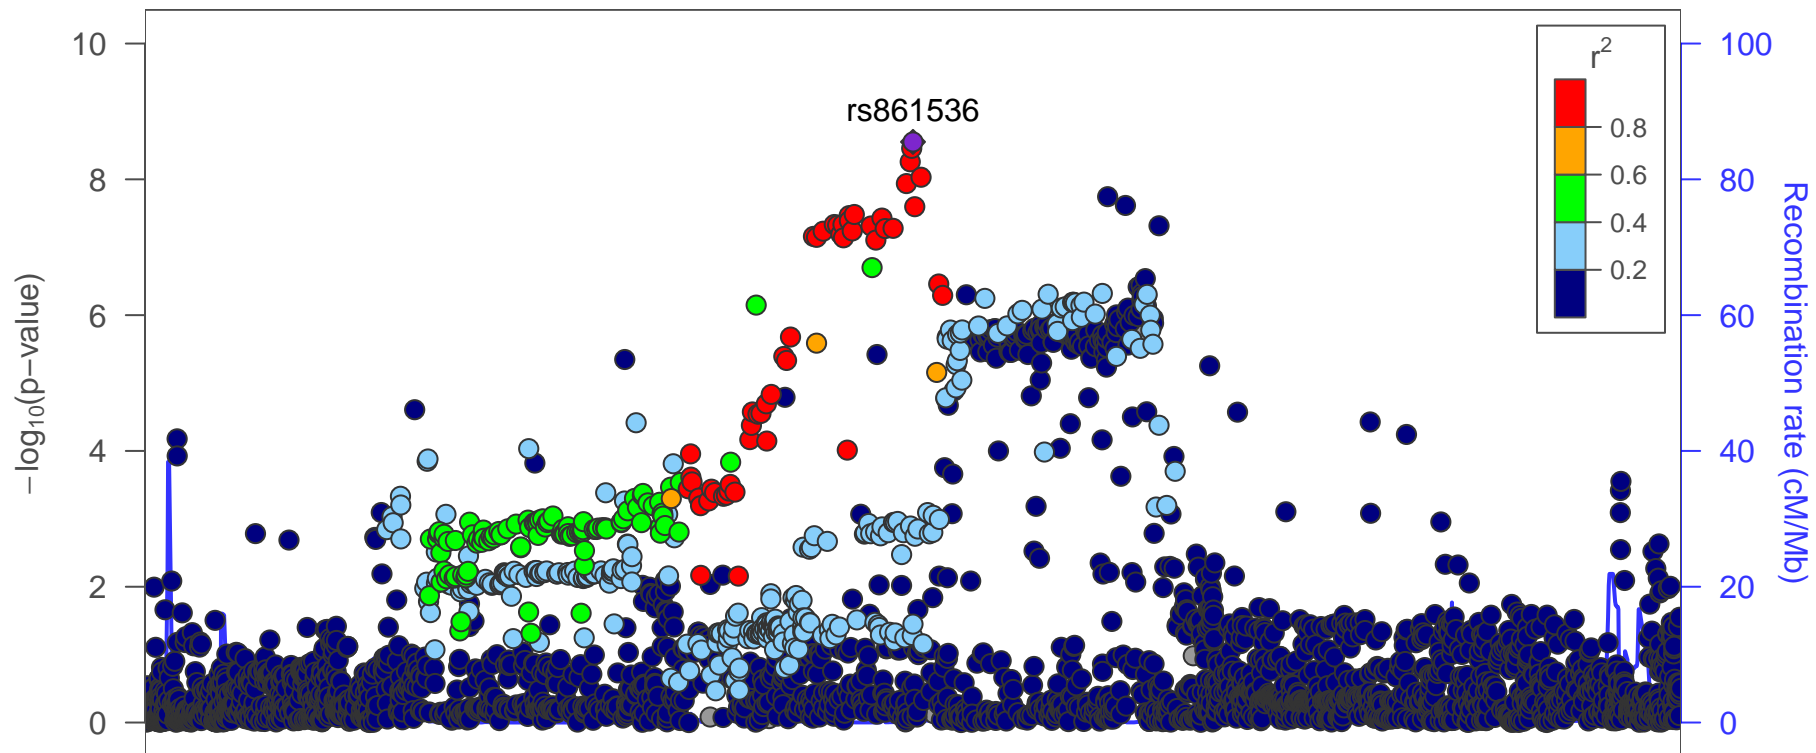

Red blood cell traits

Bone mineral density

Bipolar disorder

*LOC105378183* →

← *CKB*

*KLC1* →

← *PPP1R13B*

← *C14orf2*

*ASPG* →

*EIF5* →

*MARK3* →

← *BAG5*

← *XRCC3*

*LINC00637* →

*TDRD9* →

*MIR203A* →

*SNORA28* →

*TRMT61A* →

*ZFYVE21* →

← *RD3L*

← *MIR203B*

*APOPT1* →

*KIF26A* →

103.8

104

104.2

104.4

104.6

Position on chr14 (Mb)

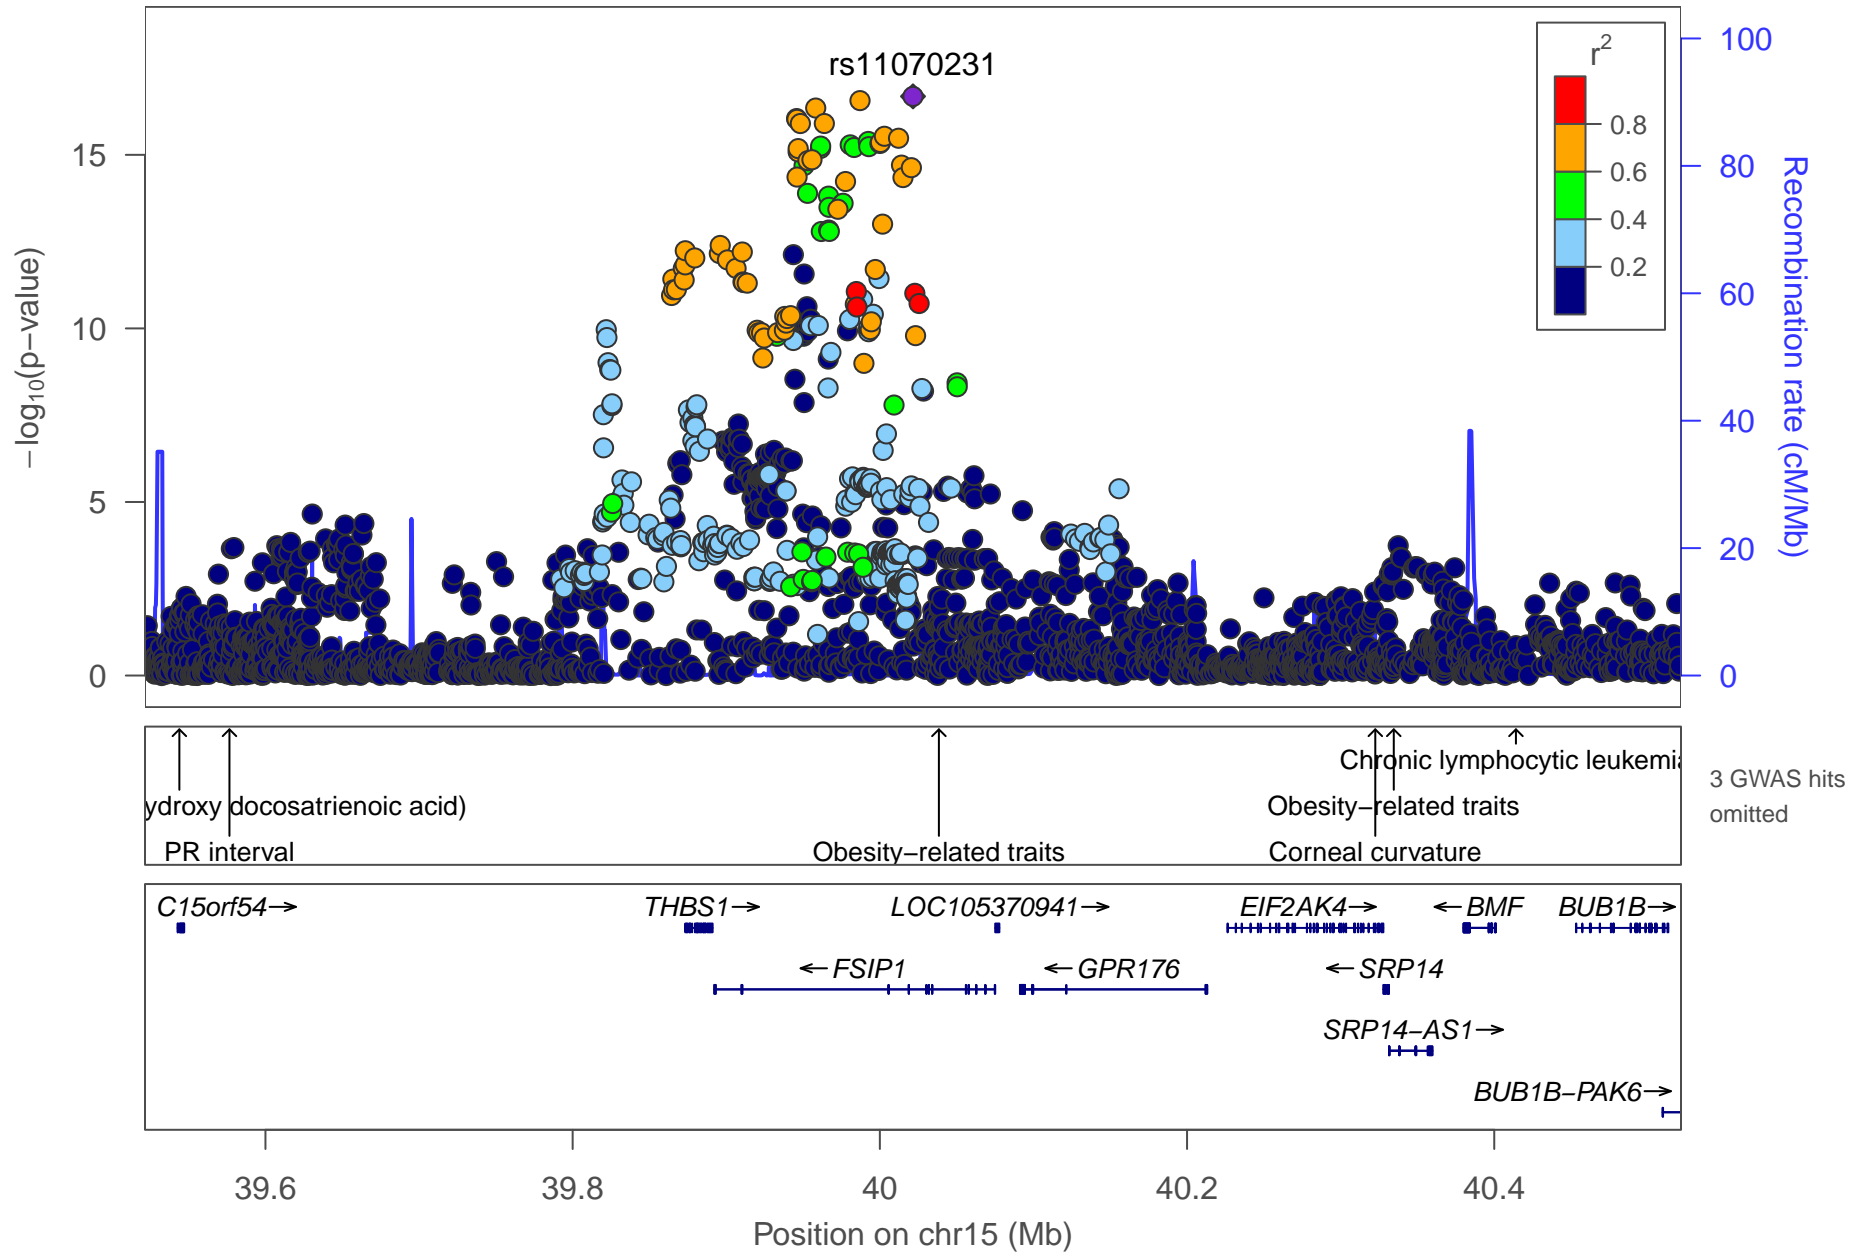

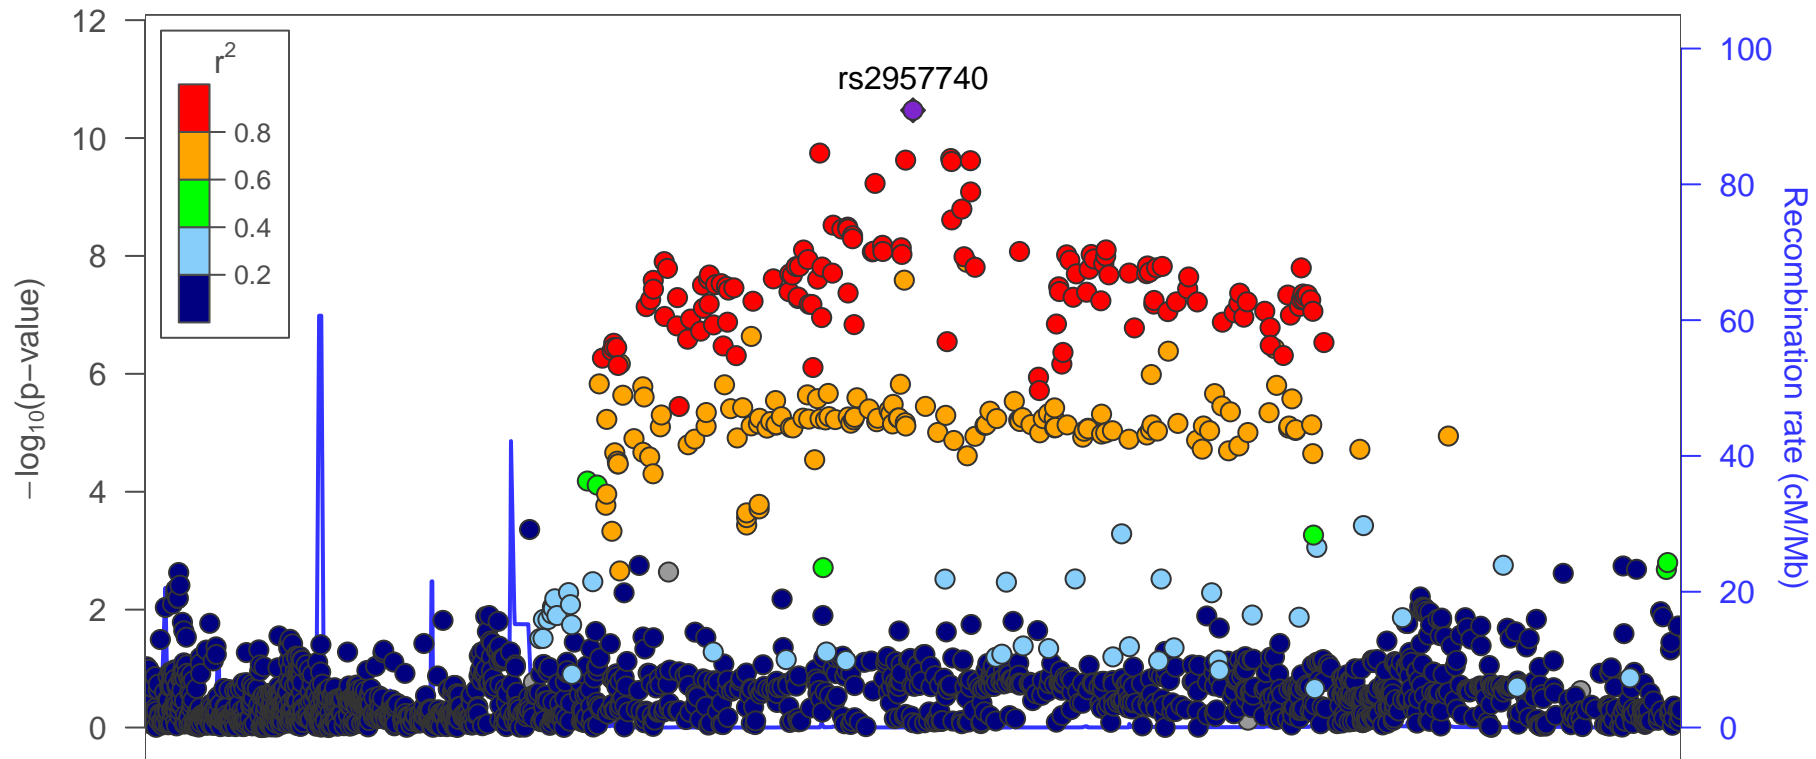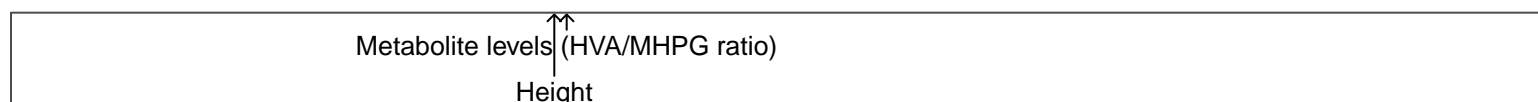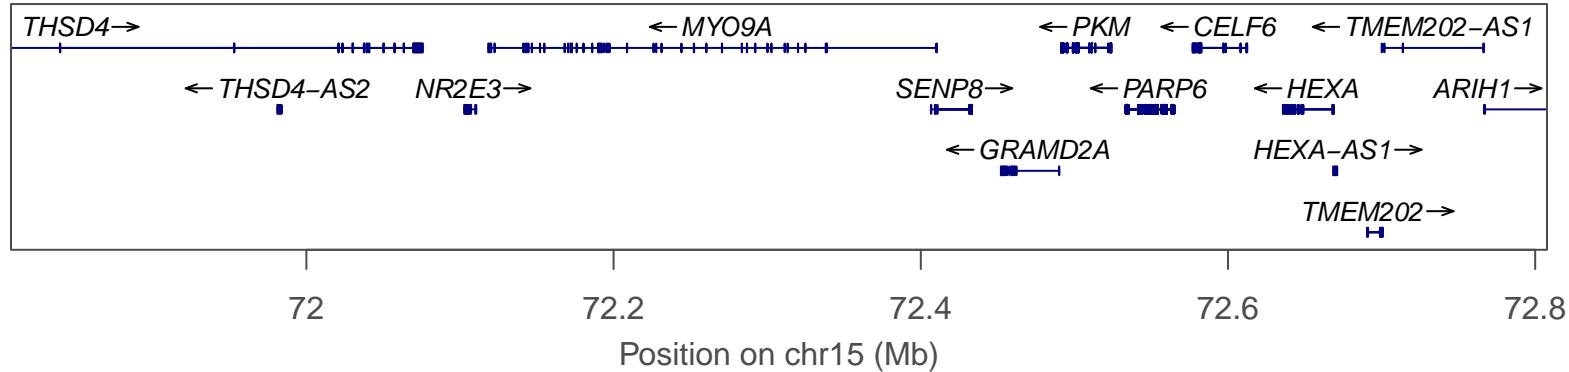



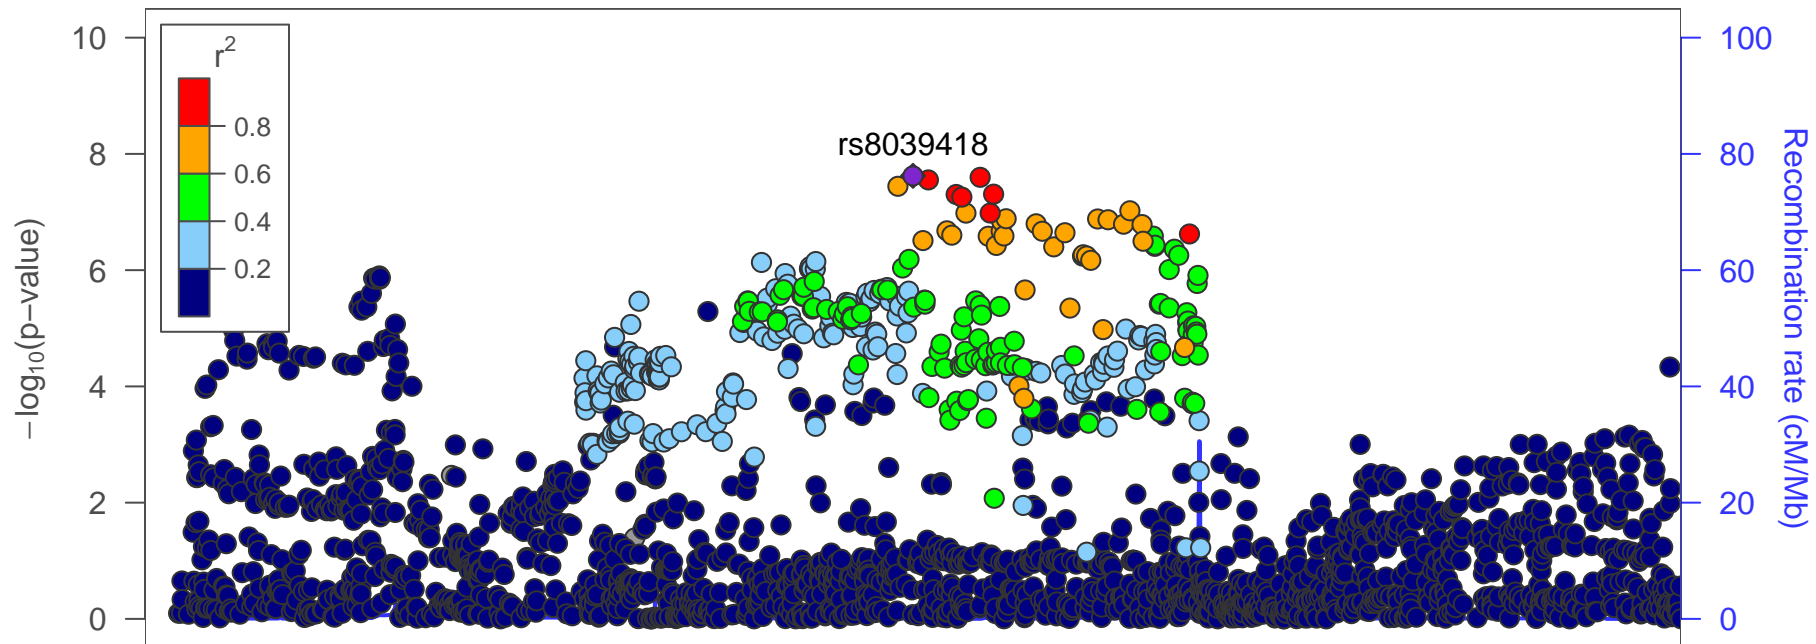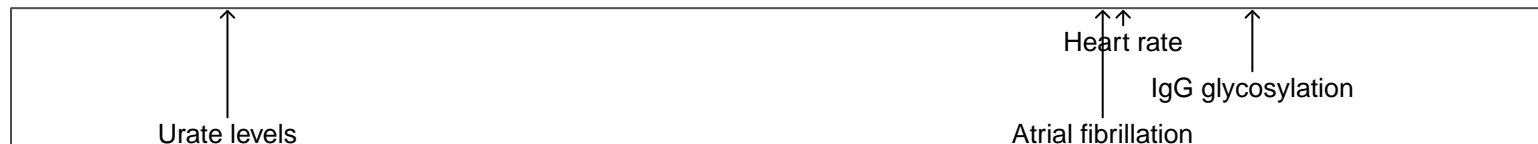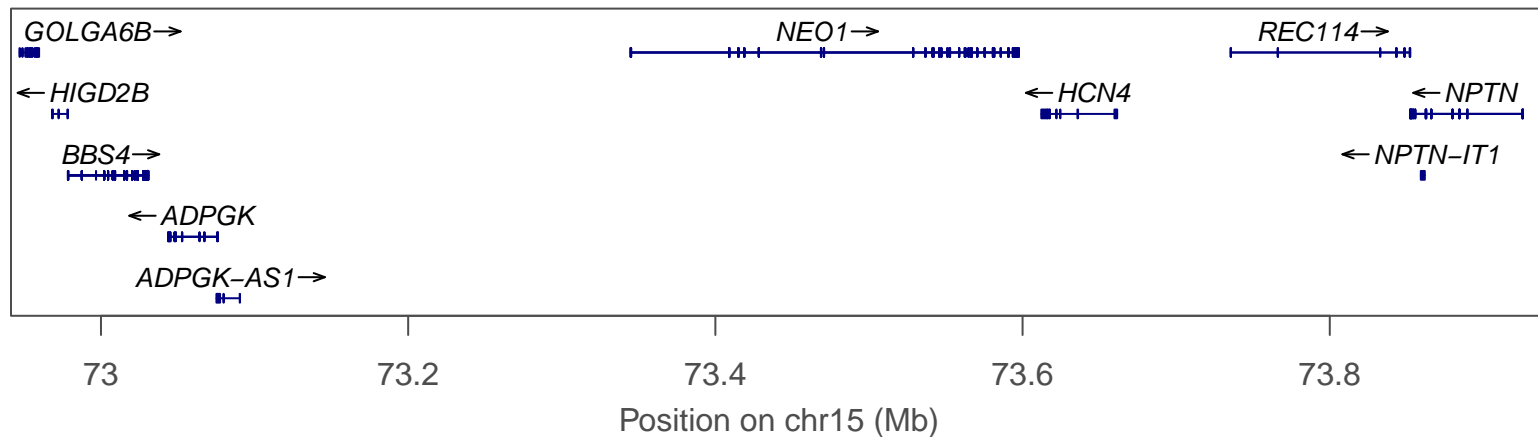

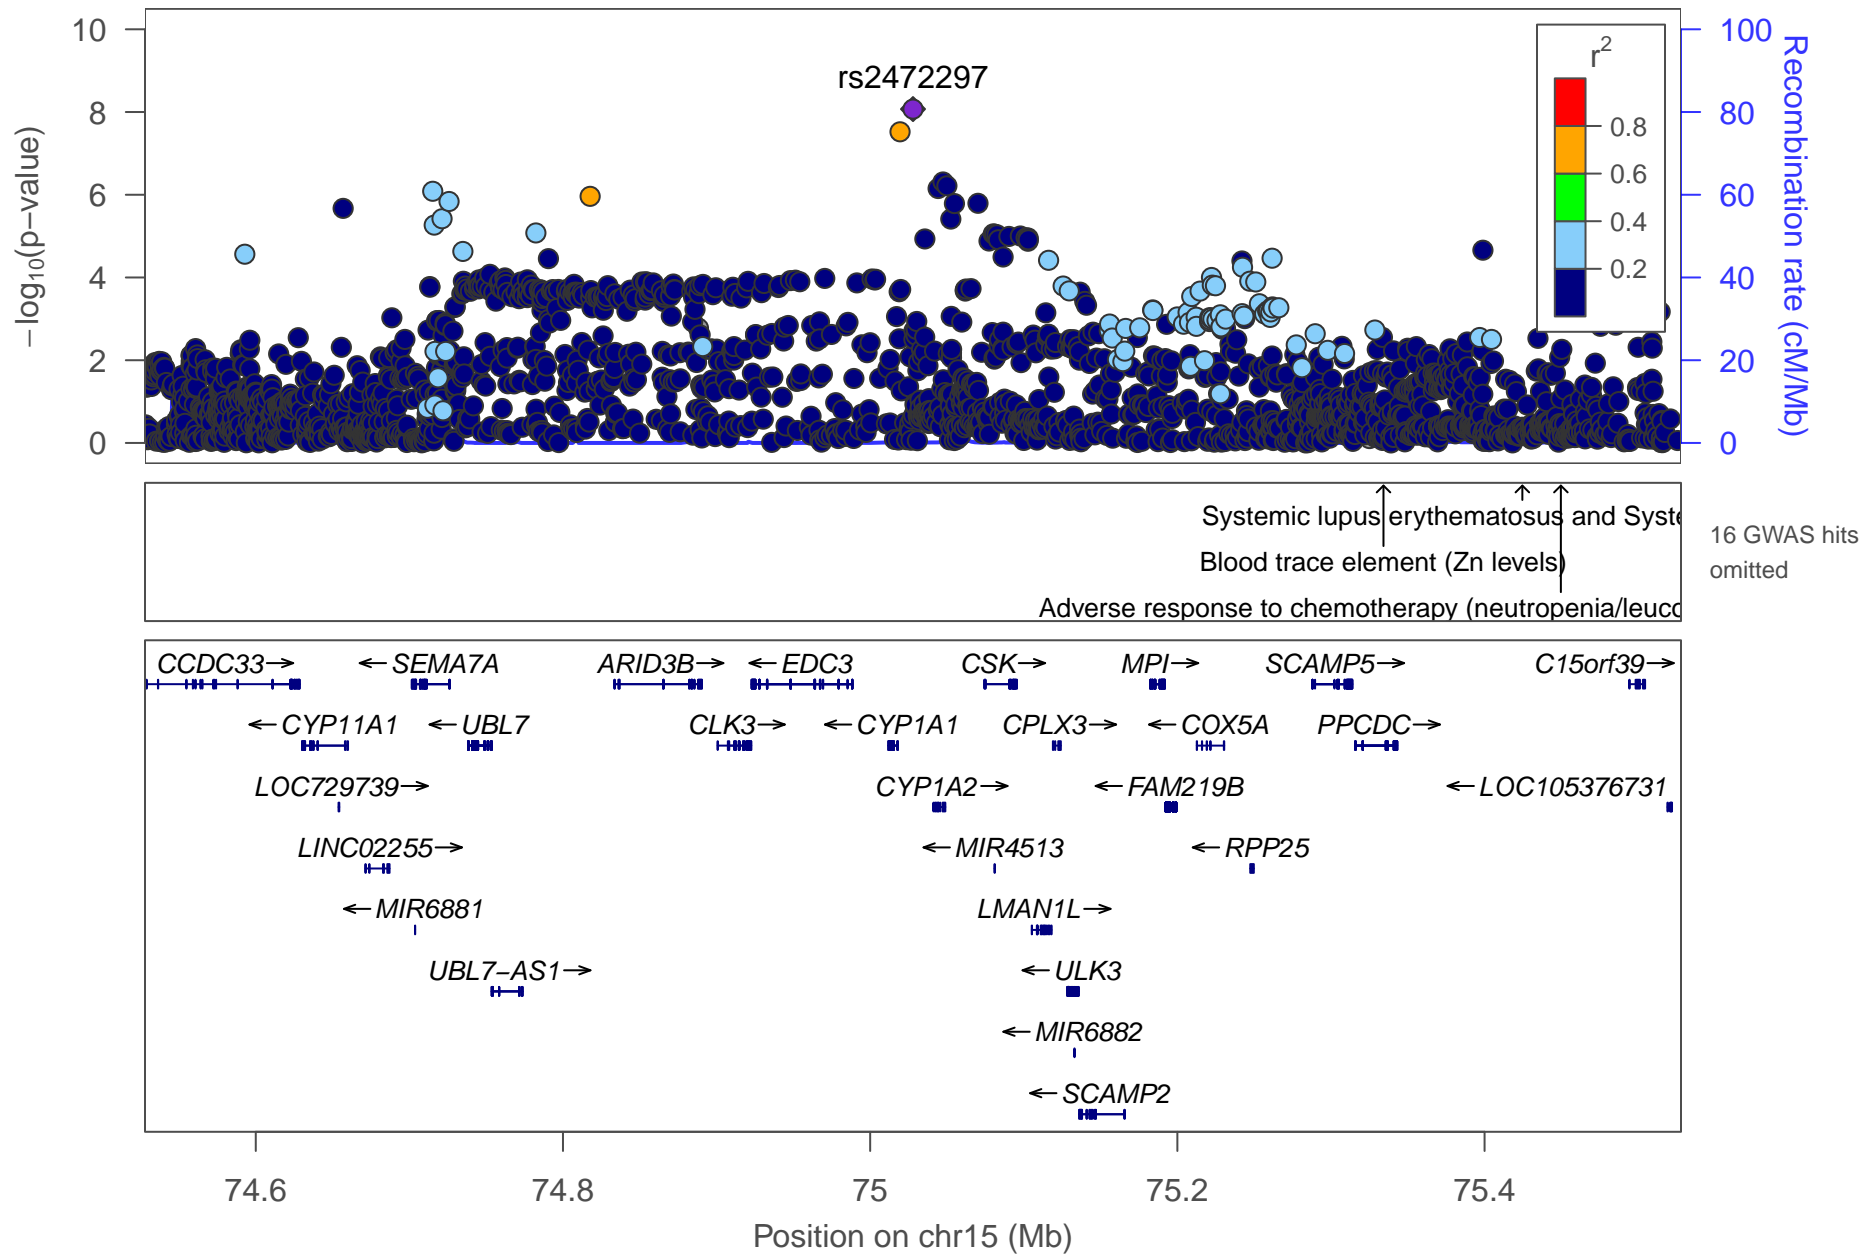

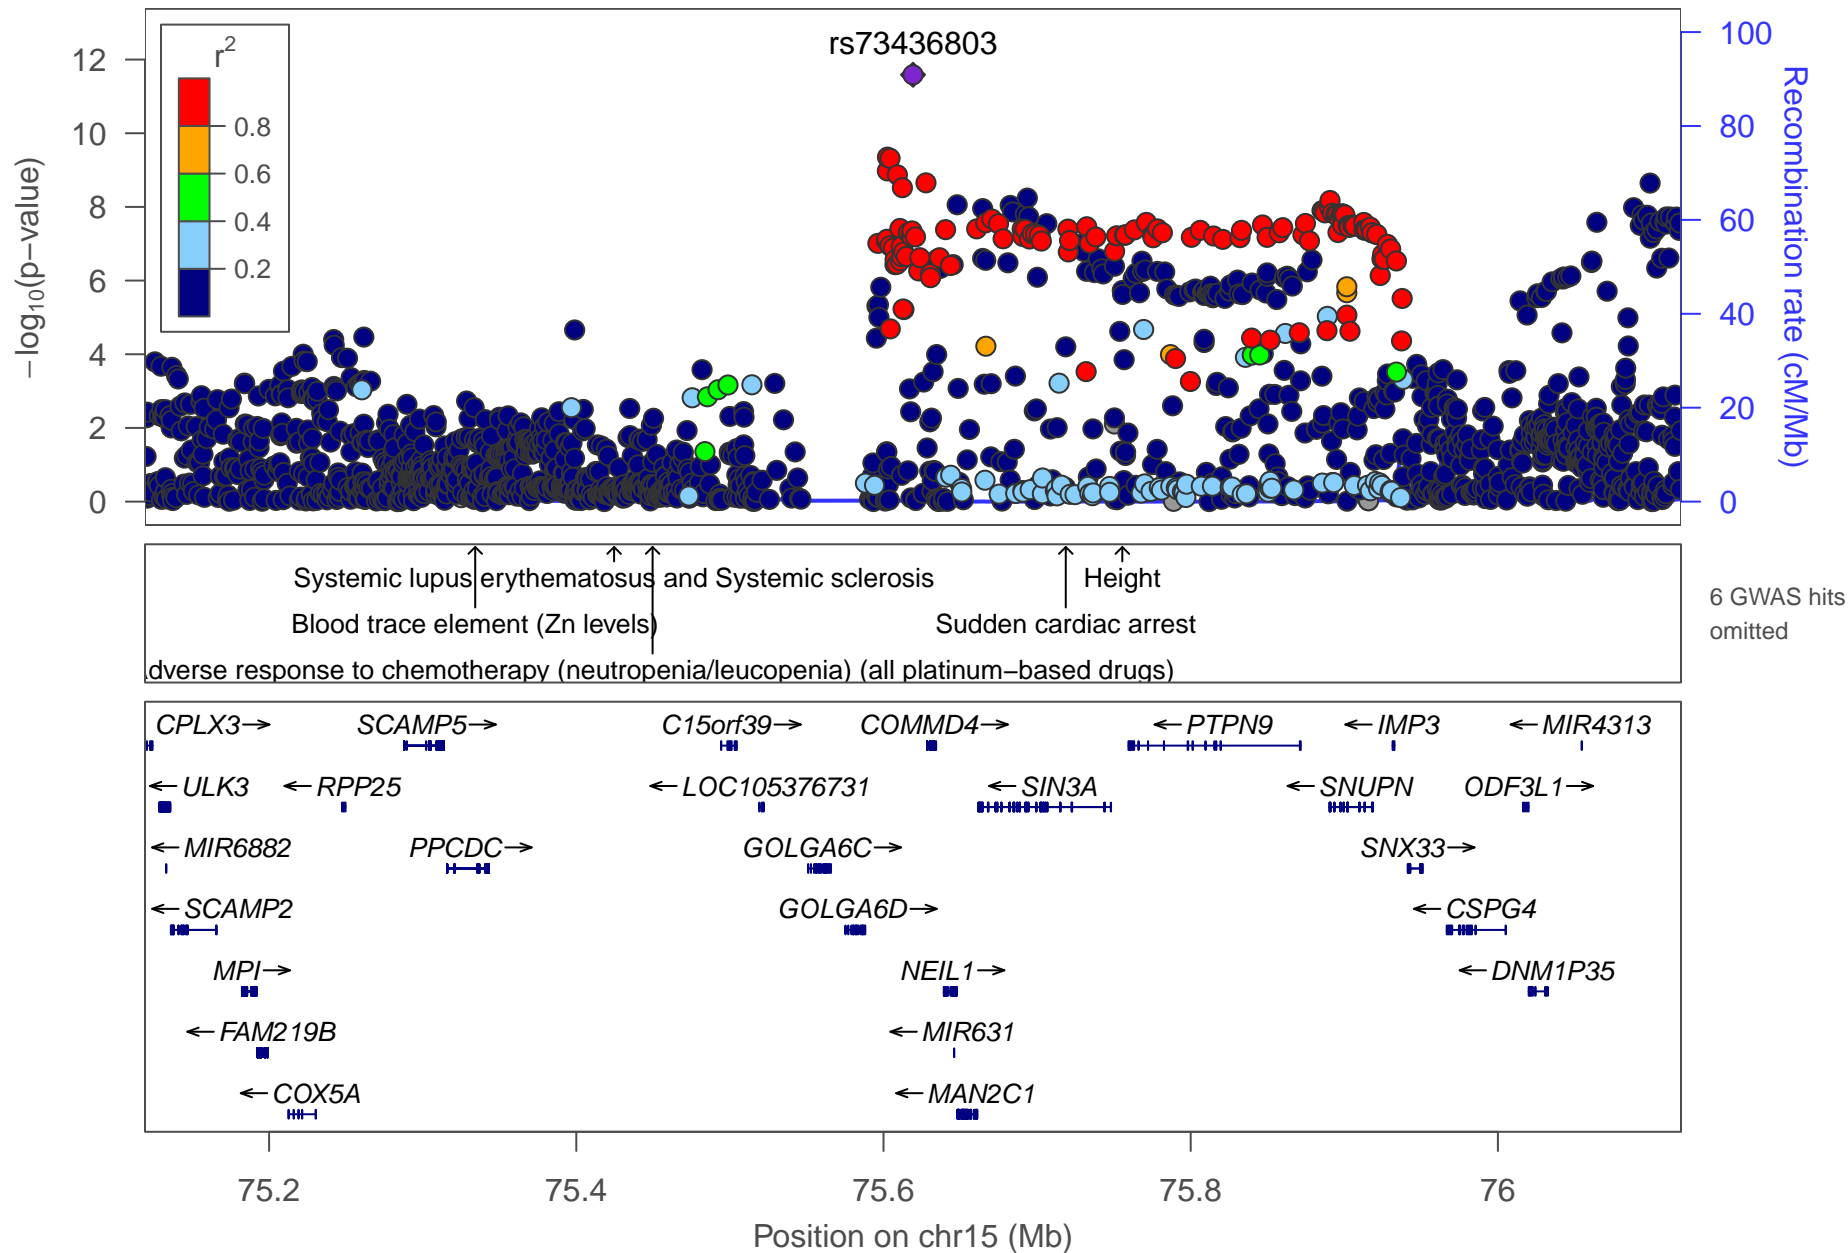

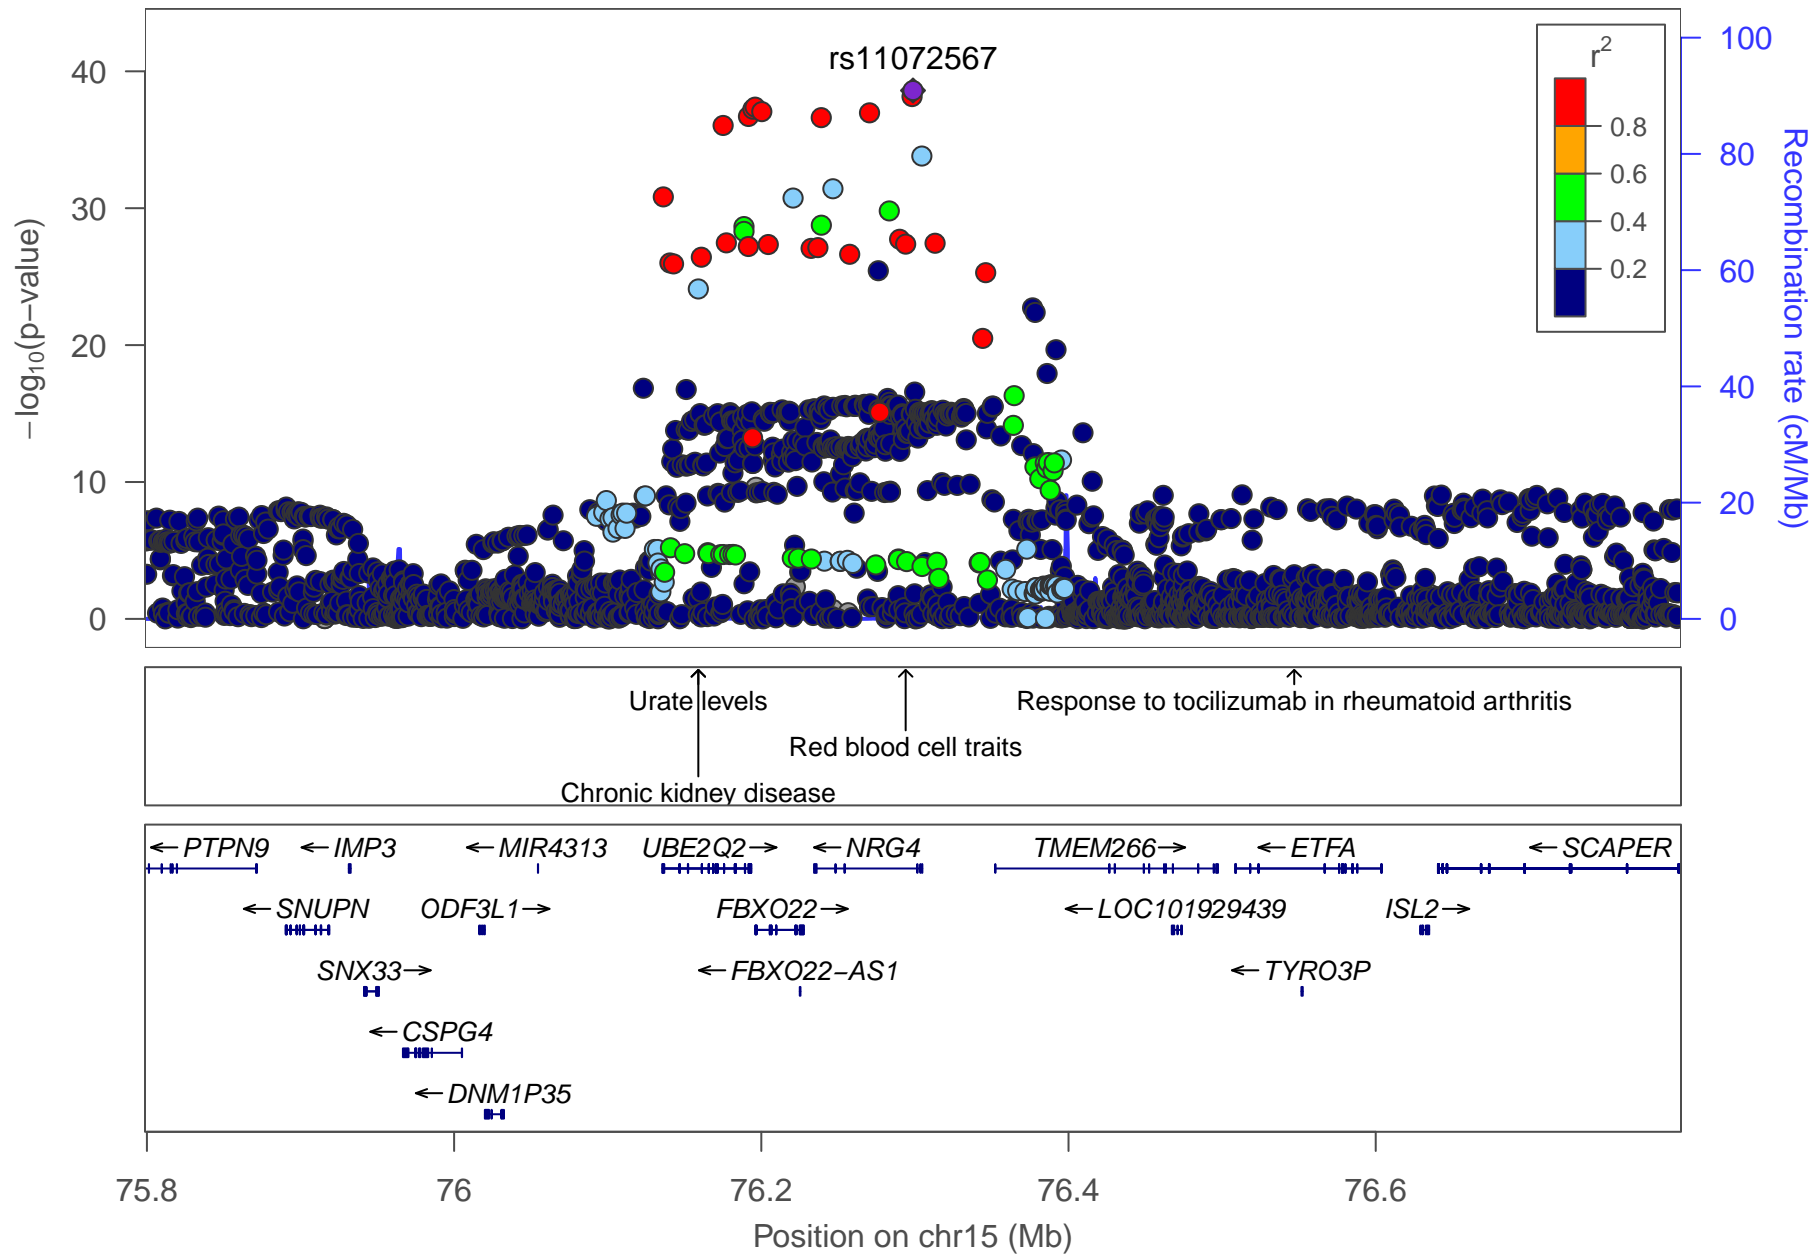

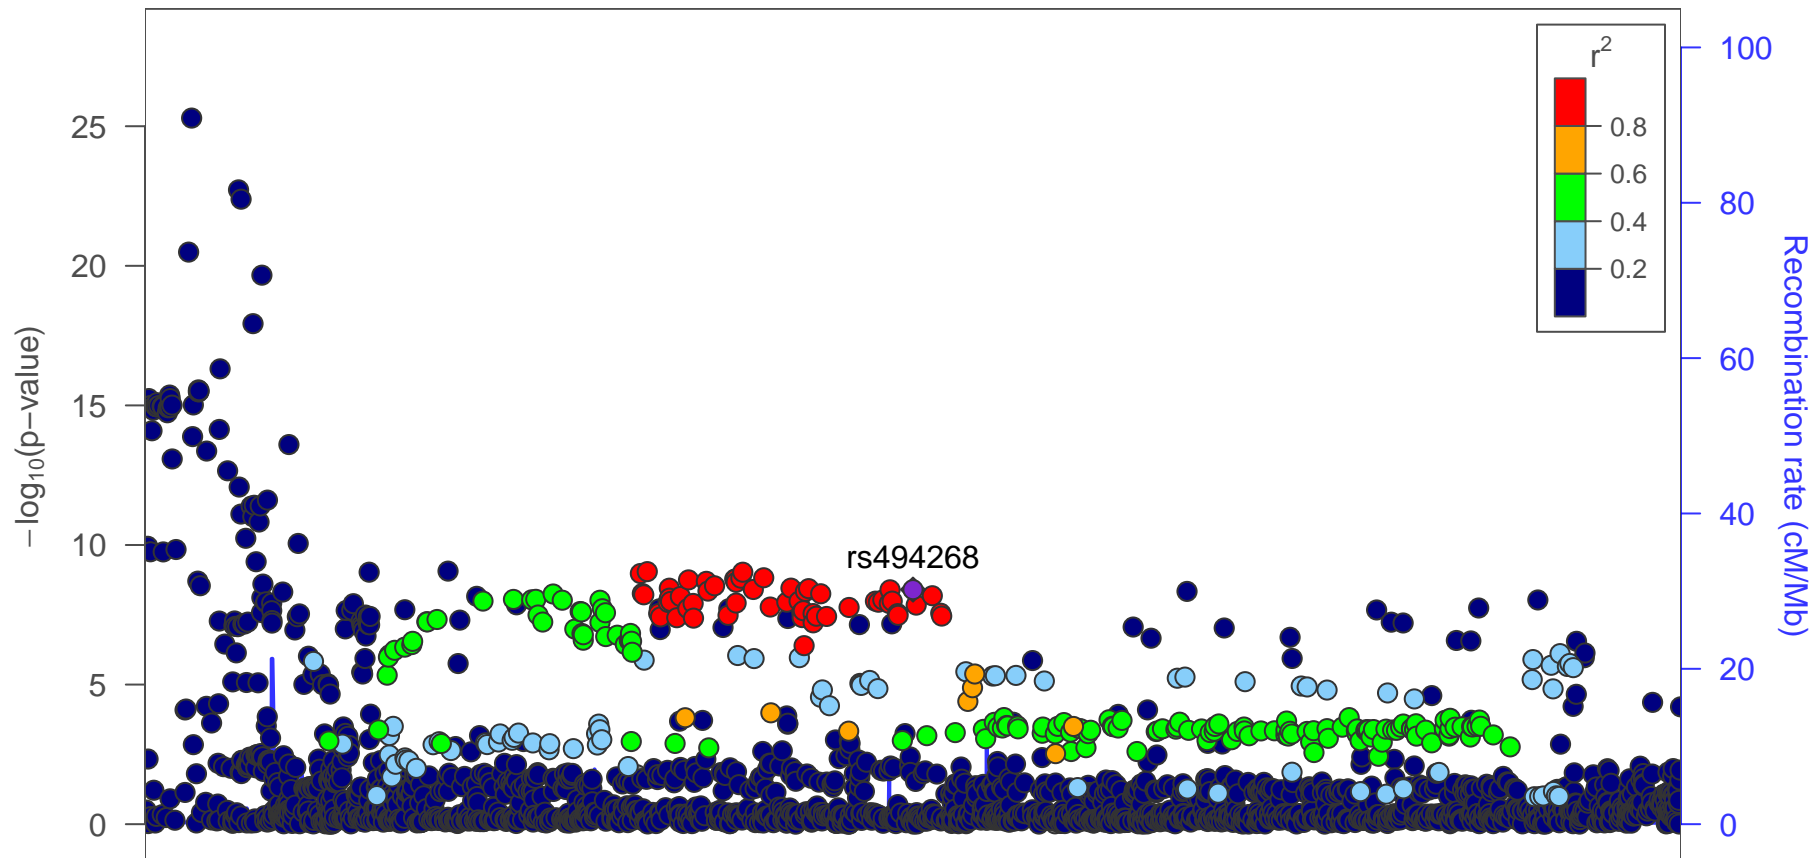

↑  
Response to tocilizumab in rheumatoid arthritis

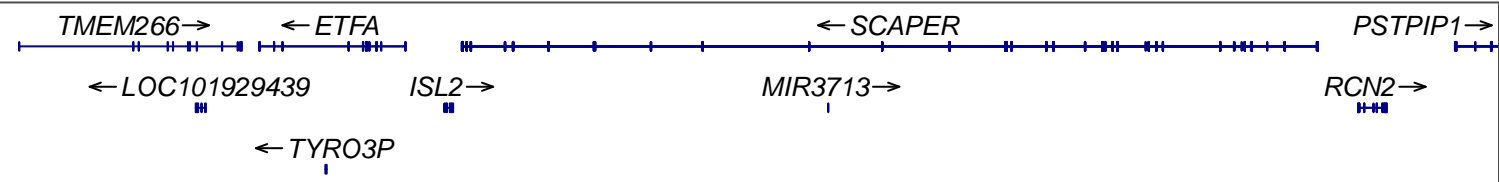

Position on chr15 (Mb)

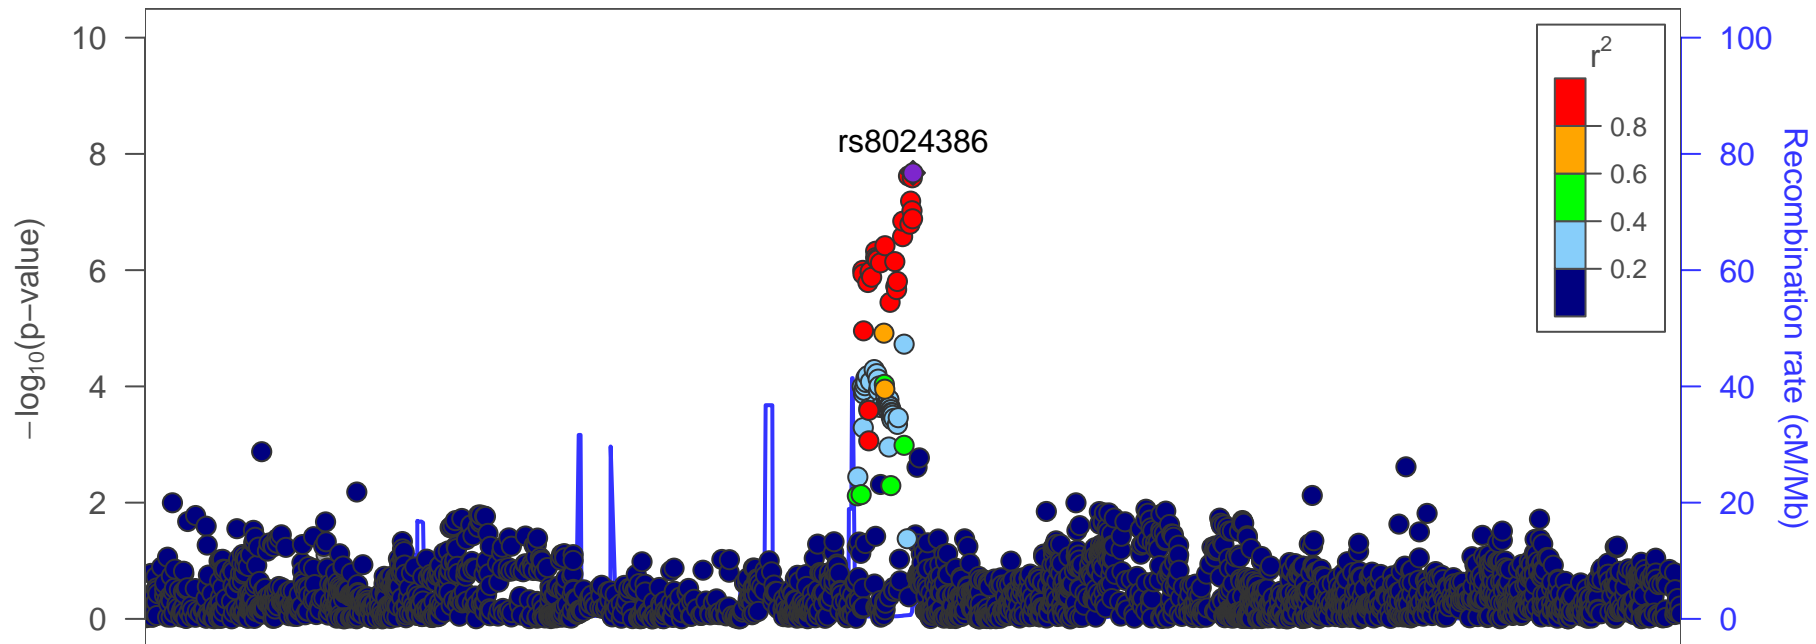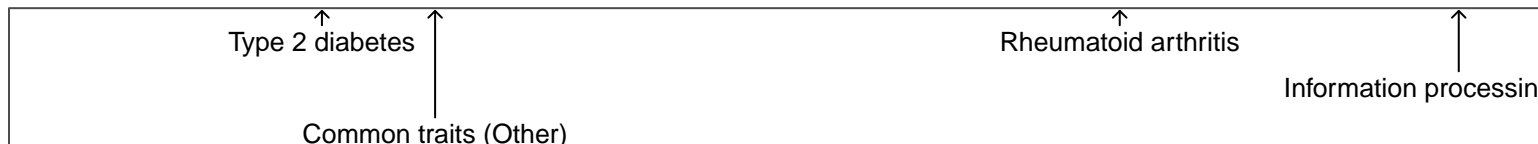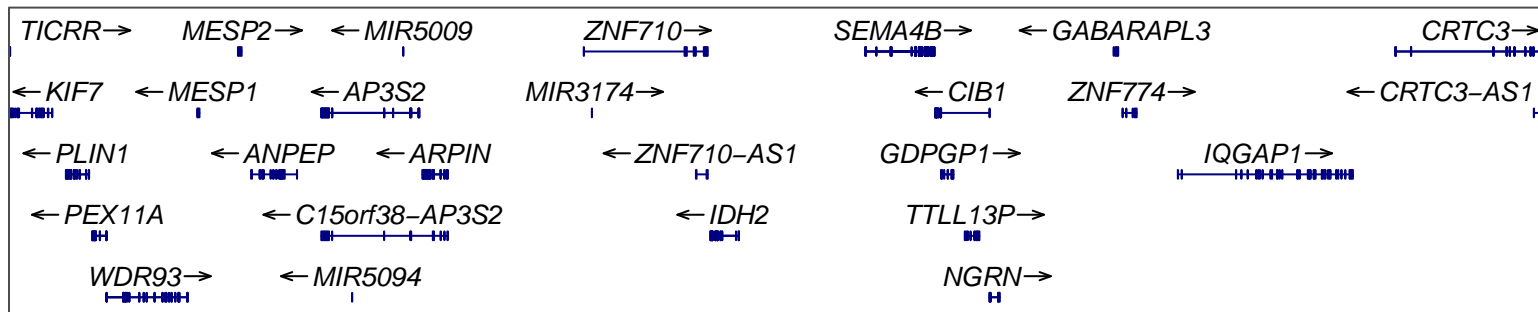

Position on chr15 (Mb)

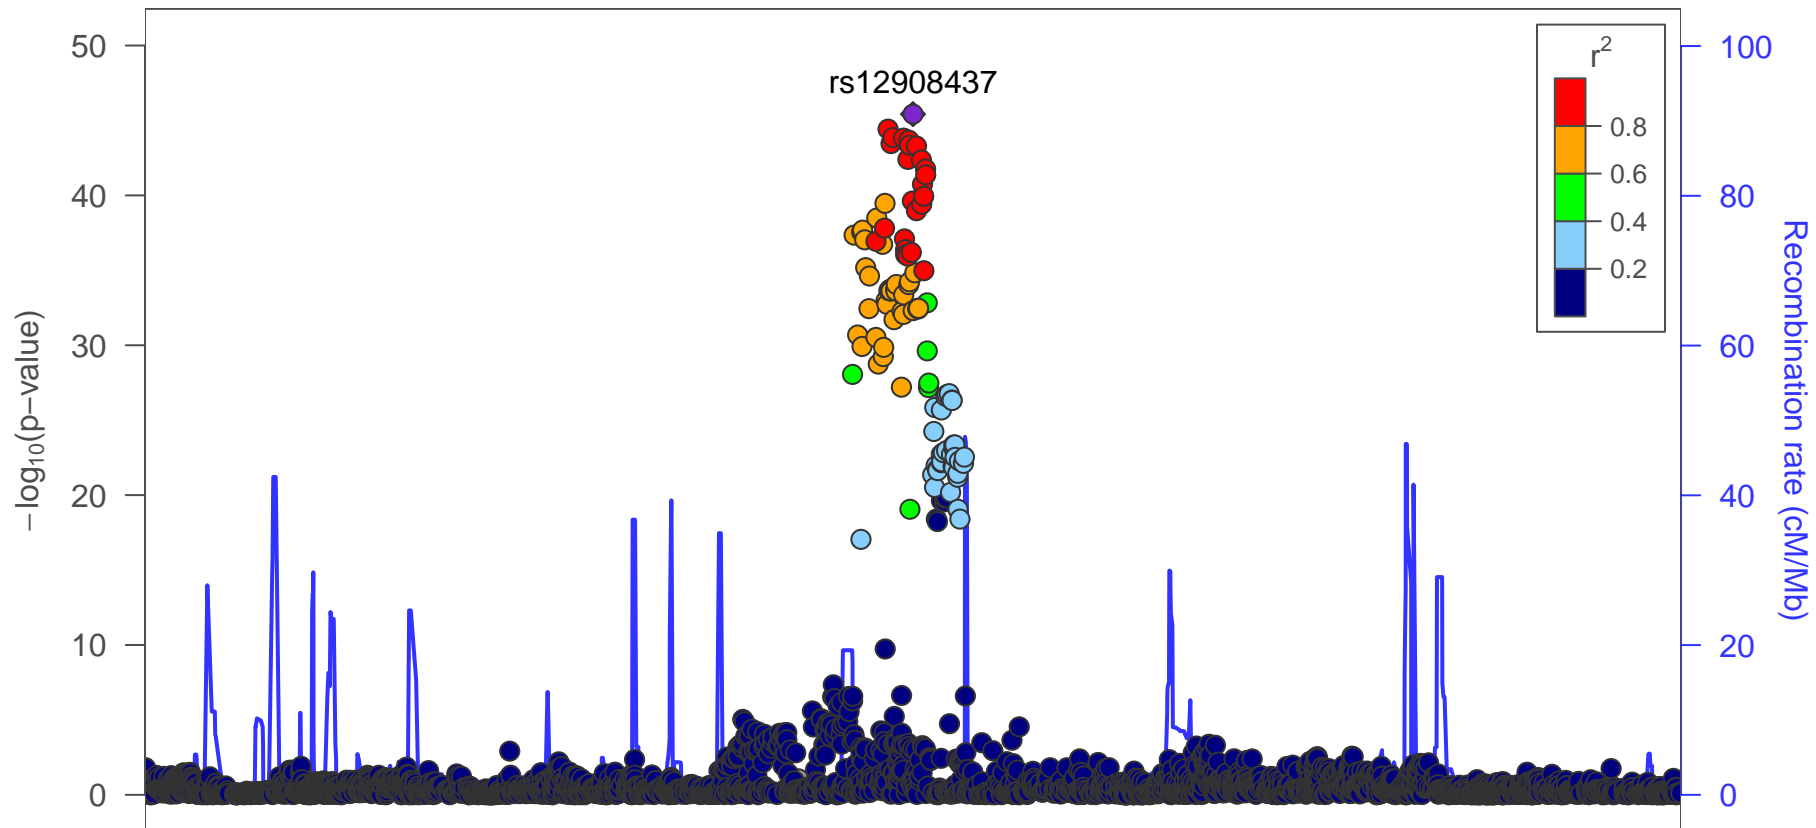

Obesity (extreme)      Arthritis (juvenile idiopathic)      Height      Urate levels

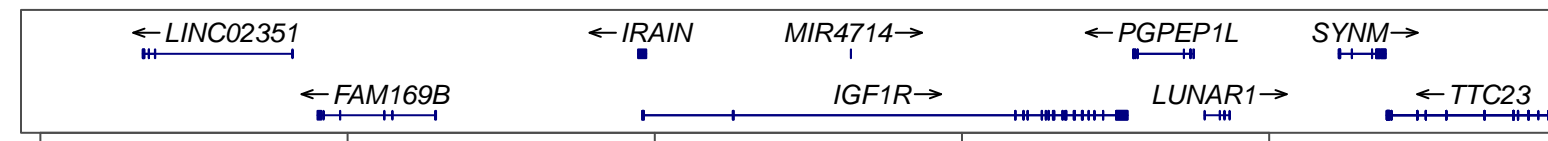

98.8      99      99.2      99.4      99.6

Position on chr15 (Mb)

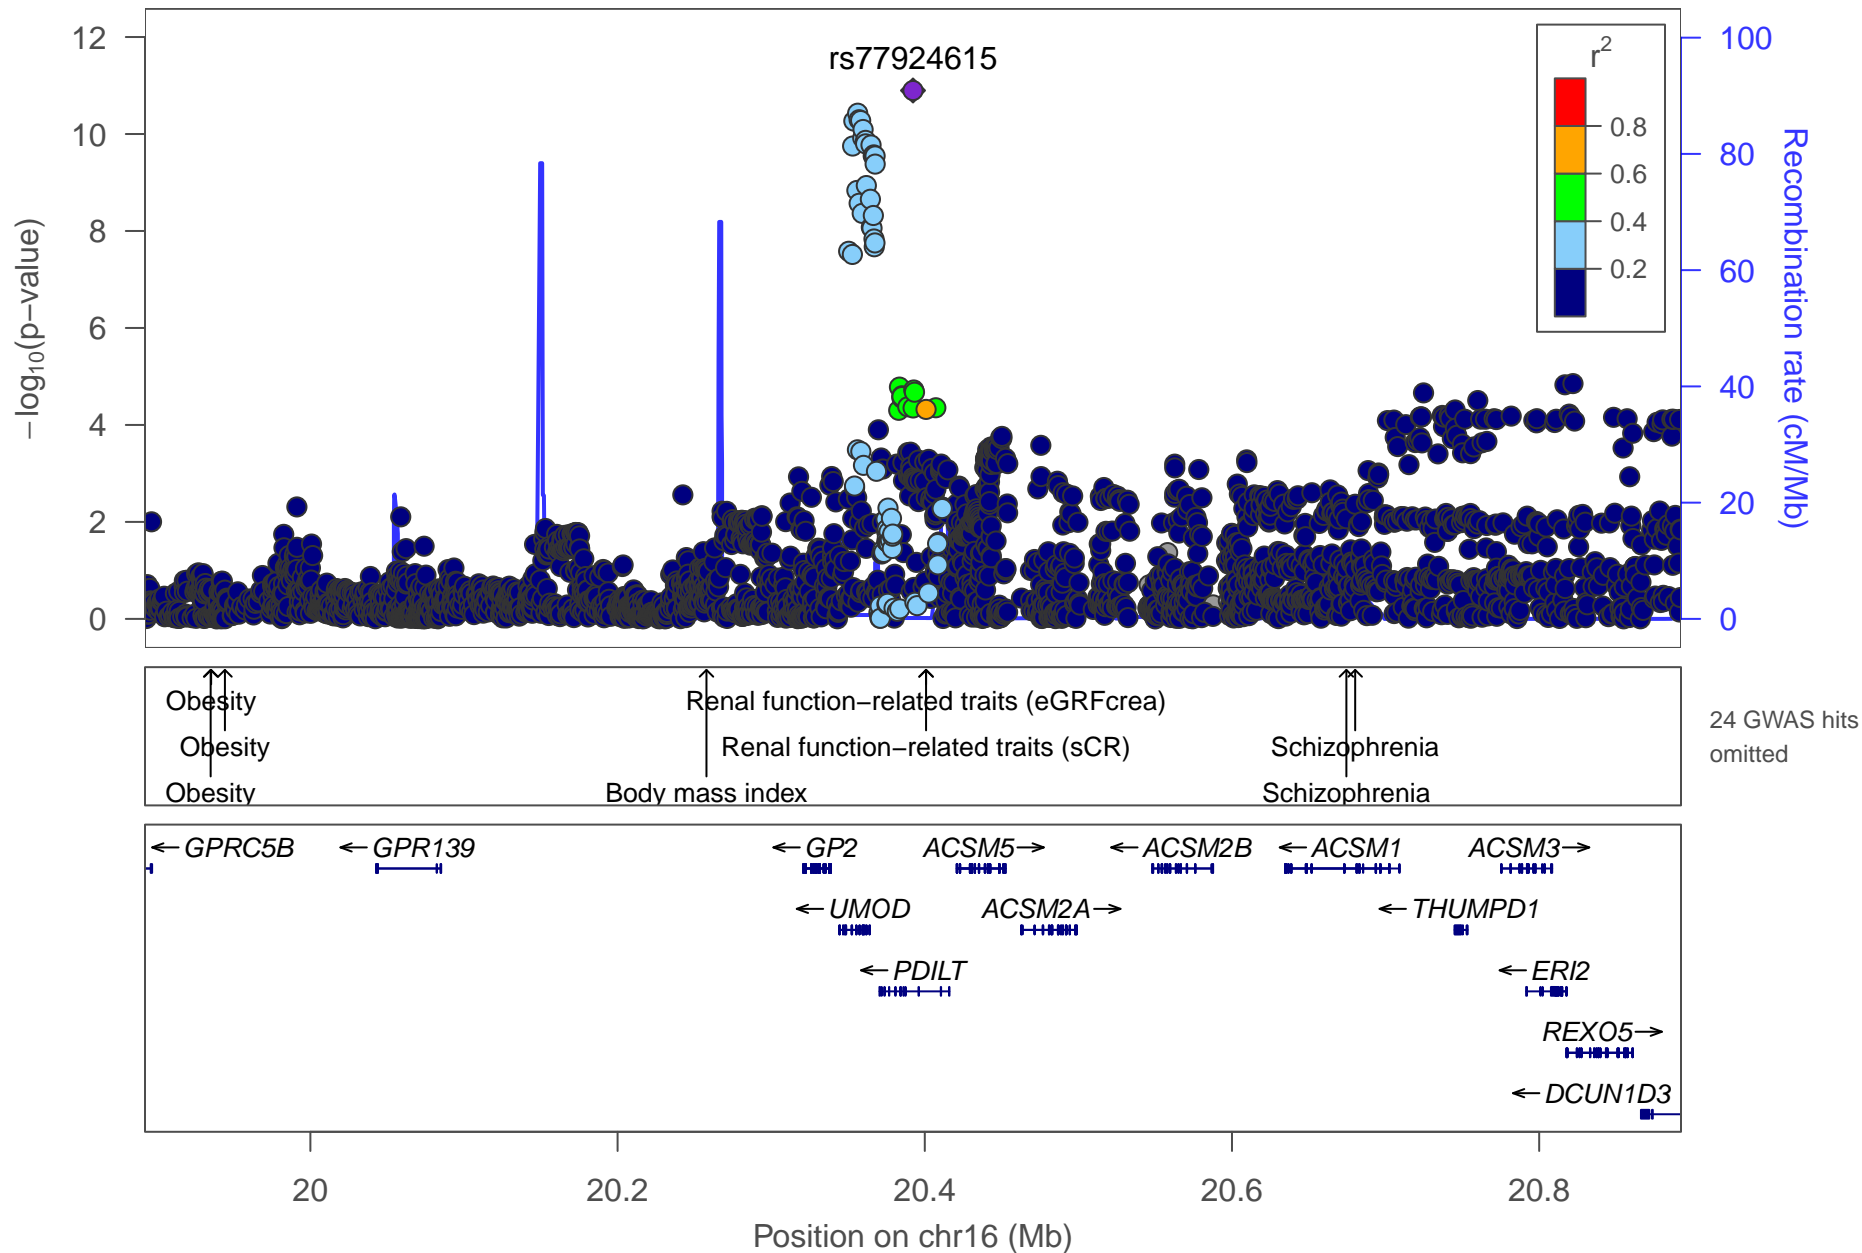



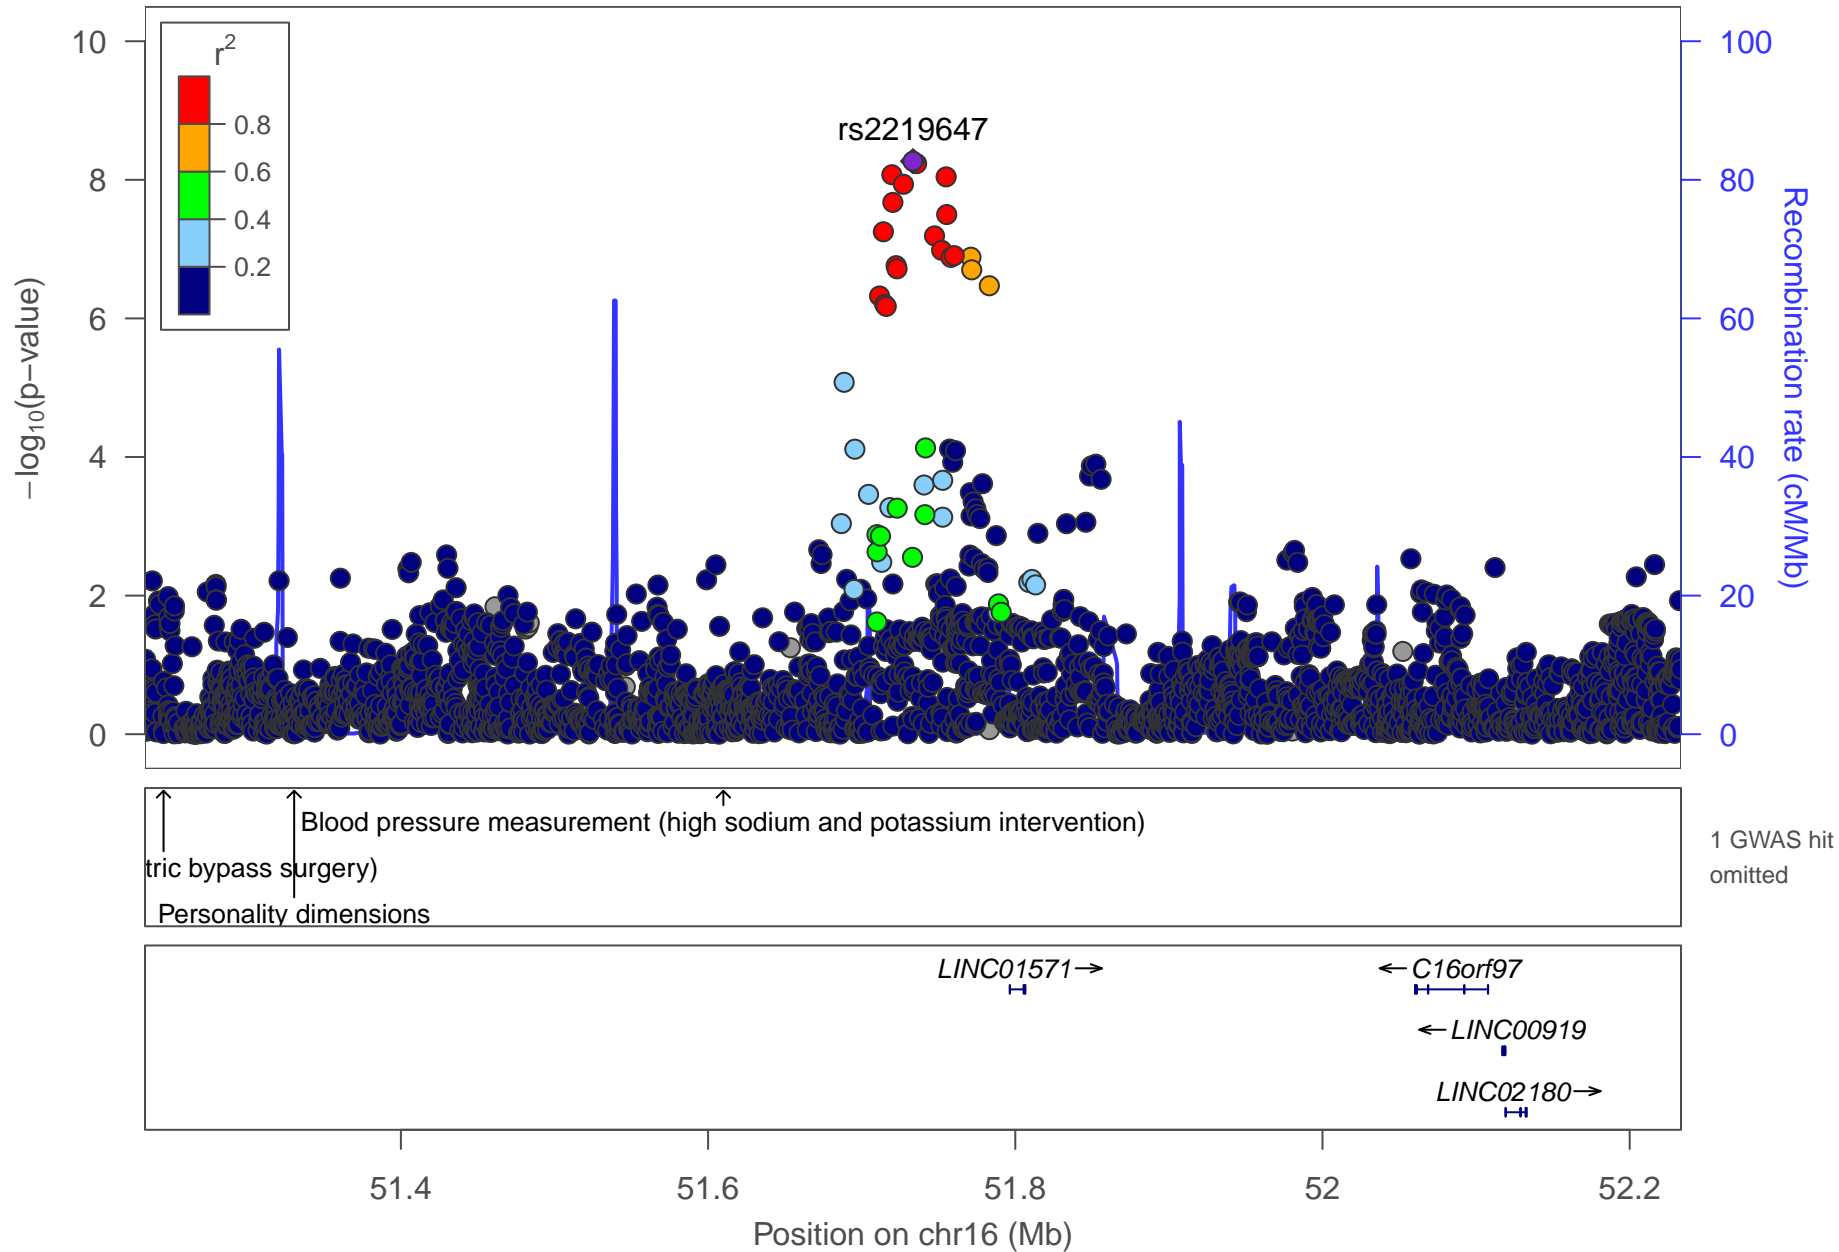

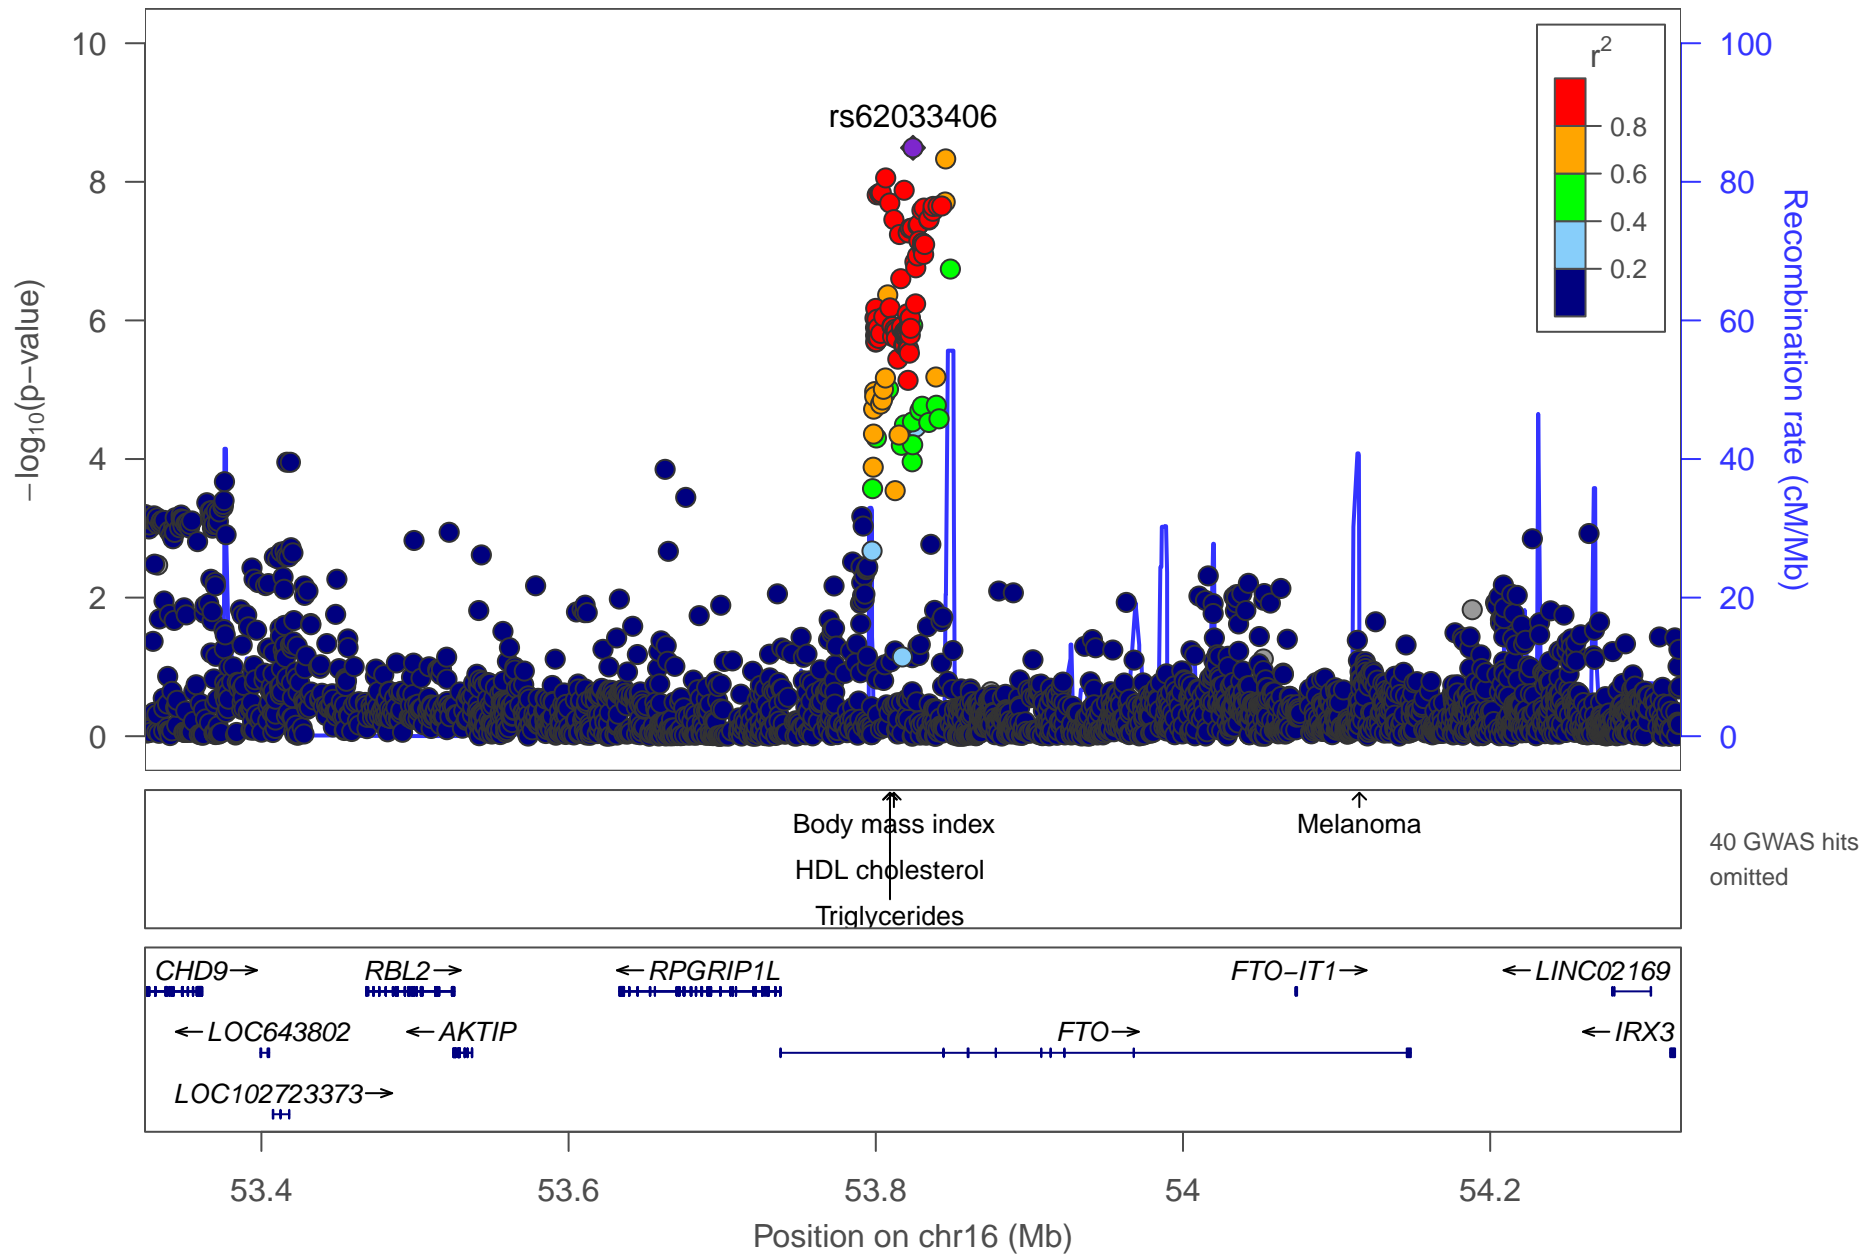

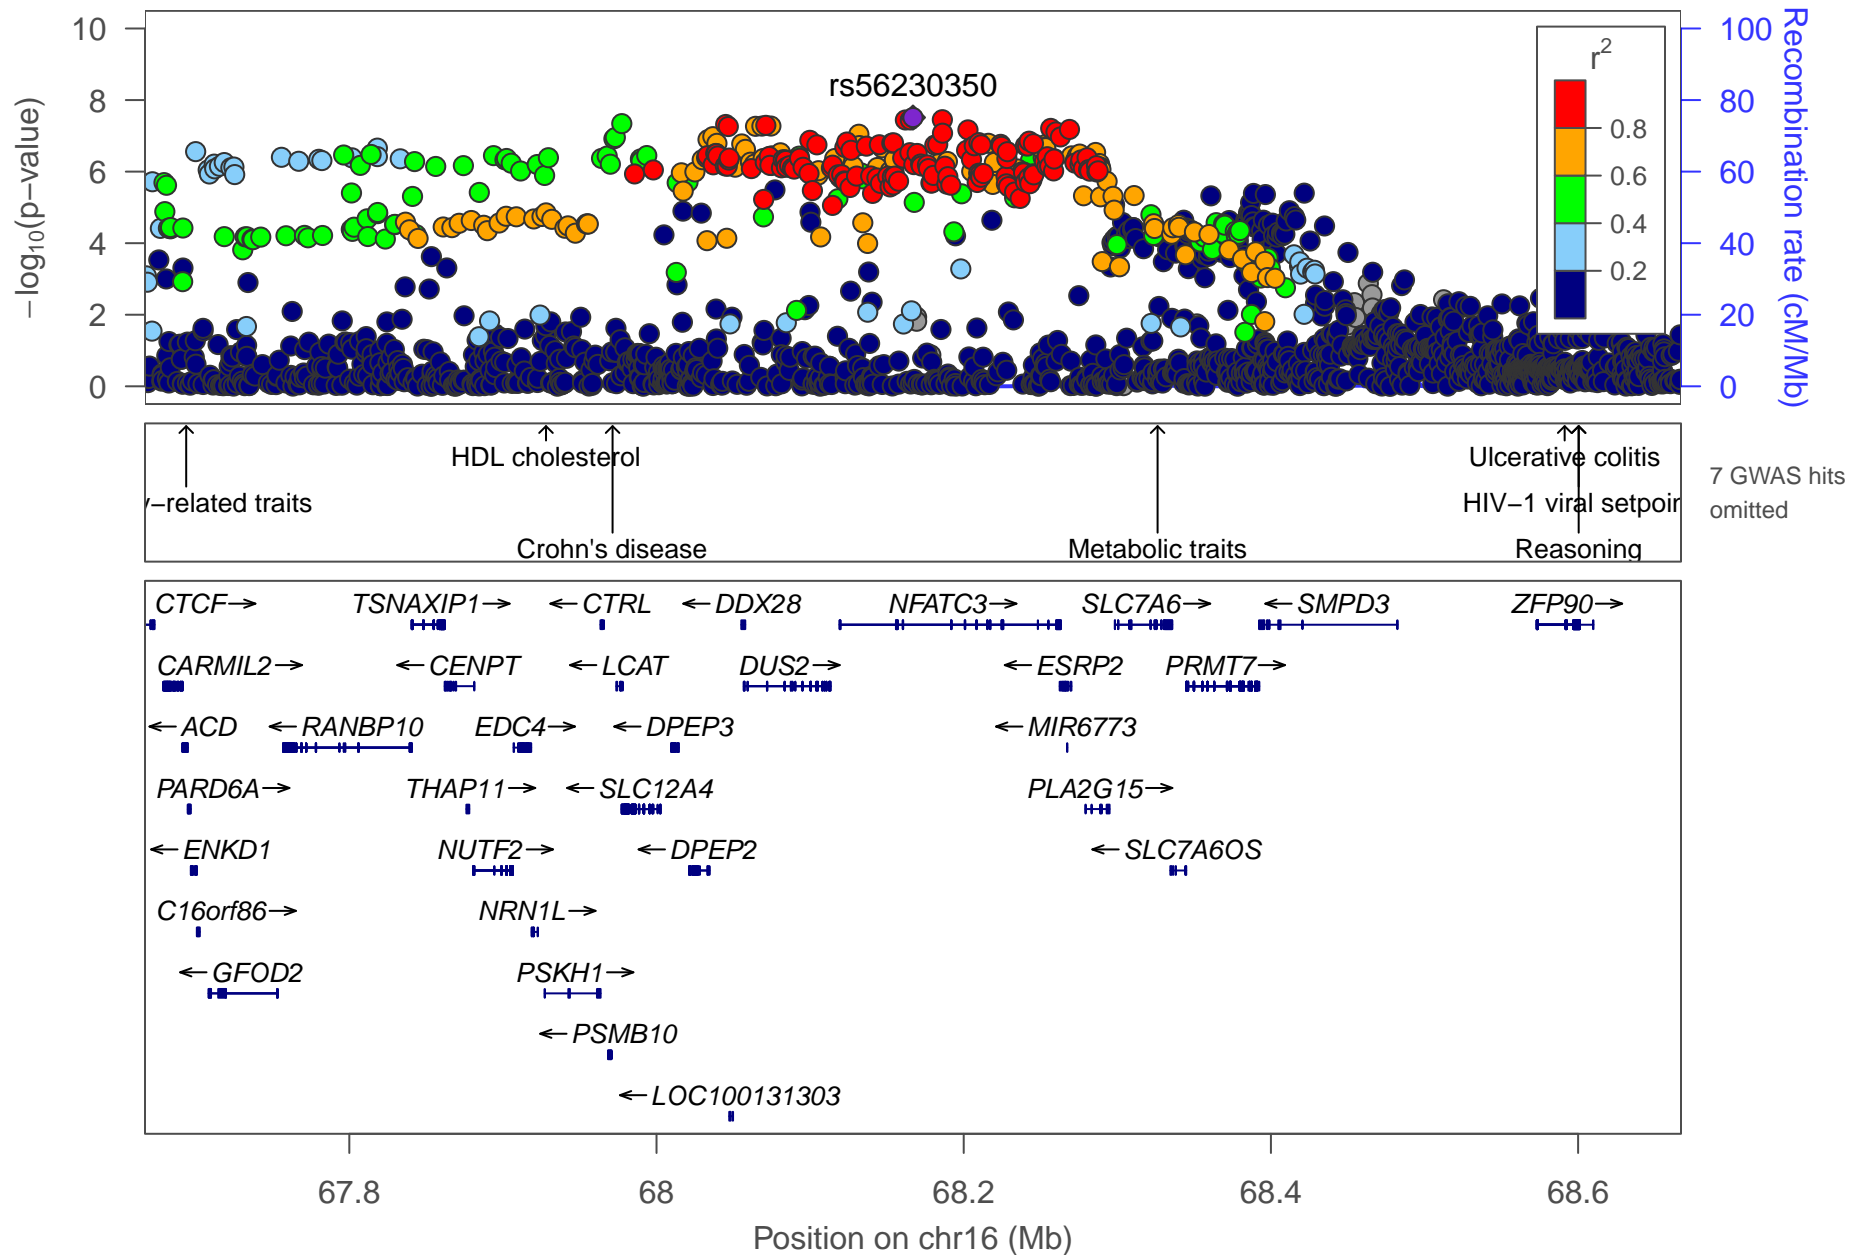

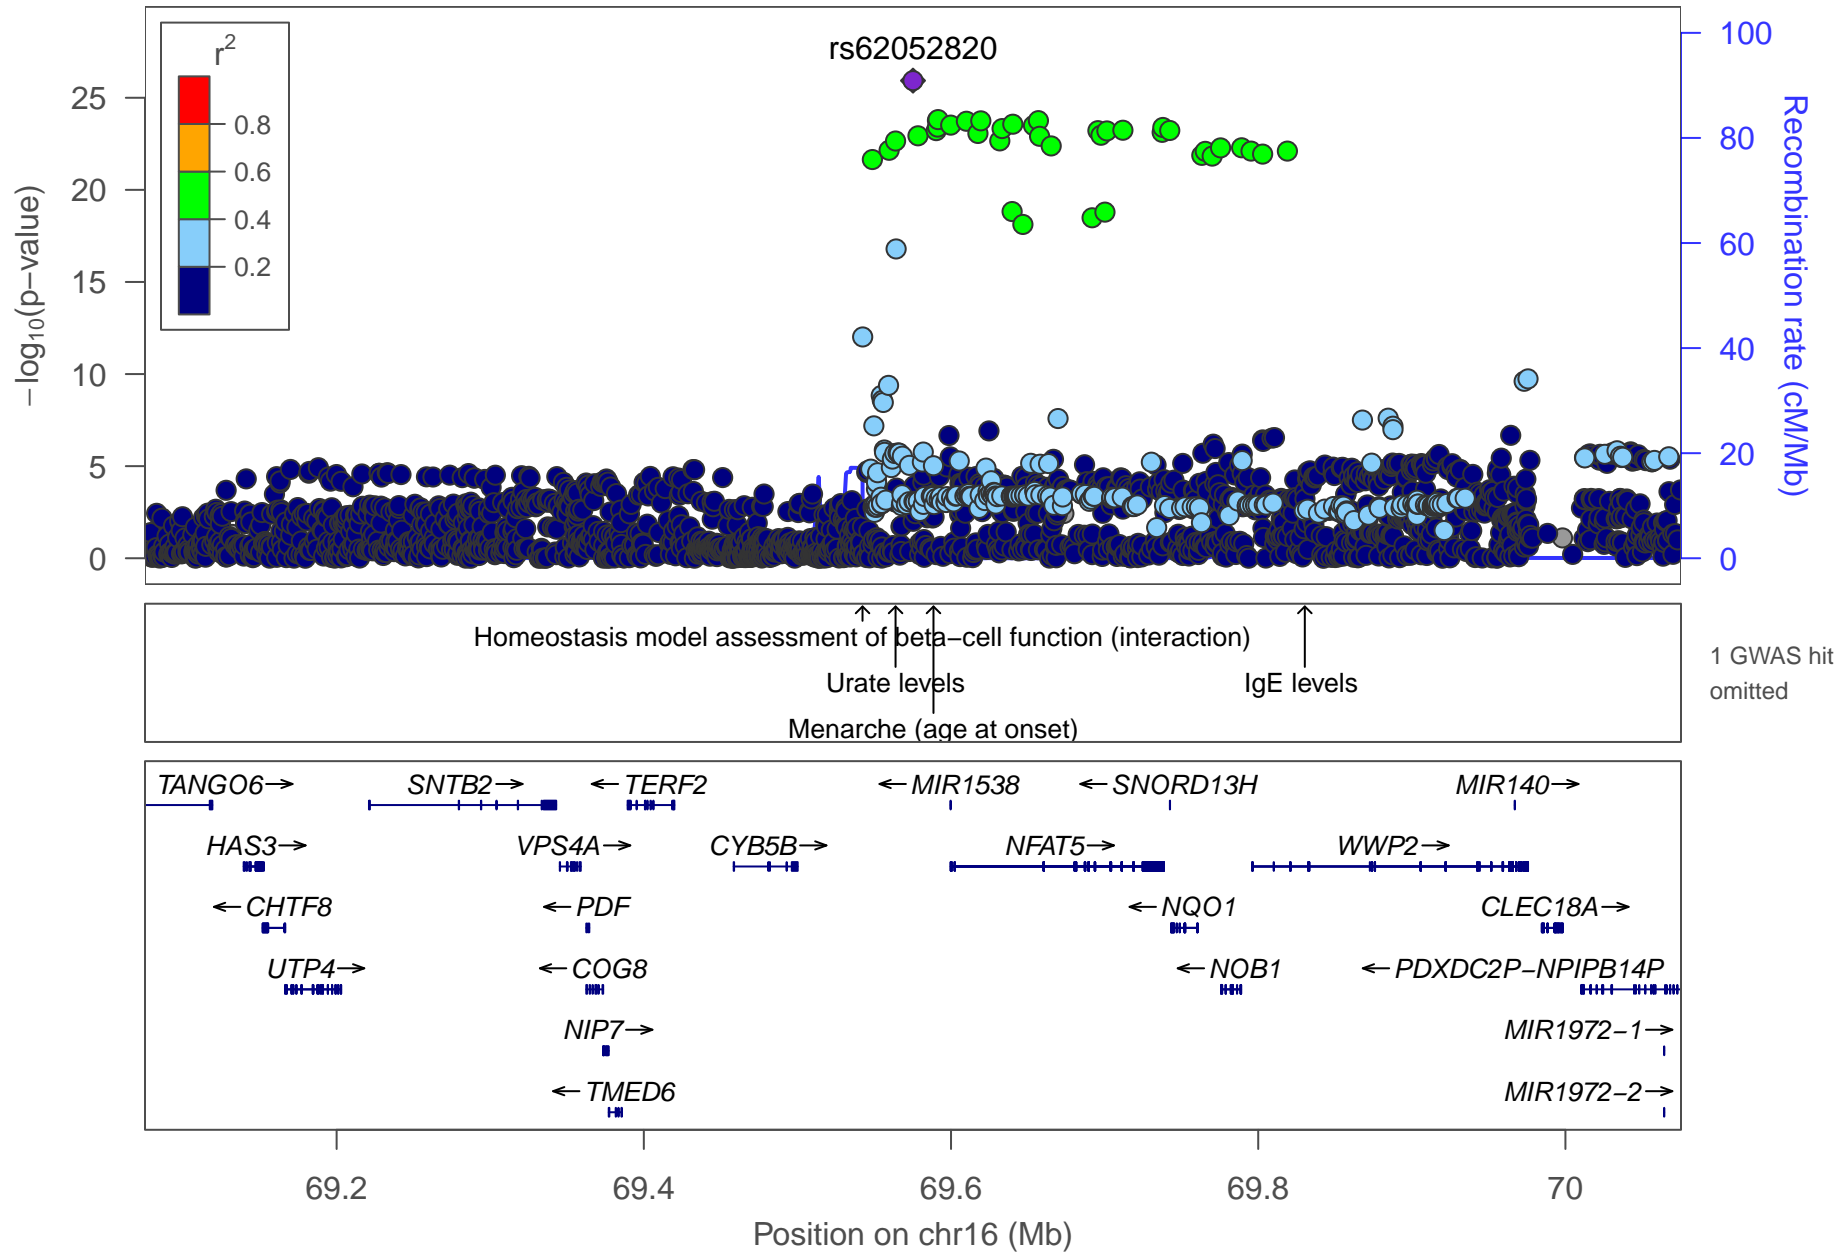

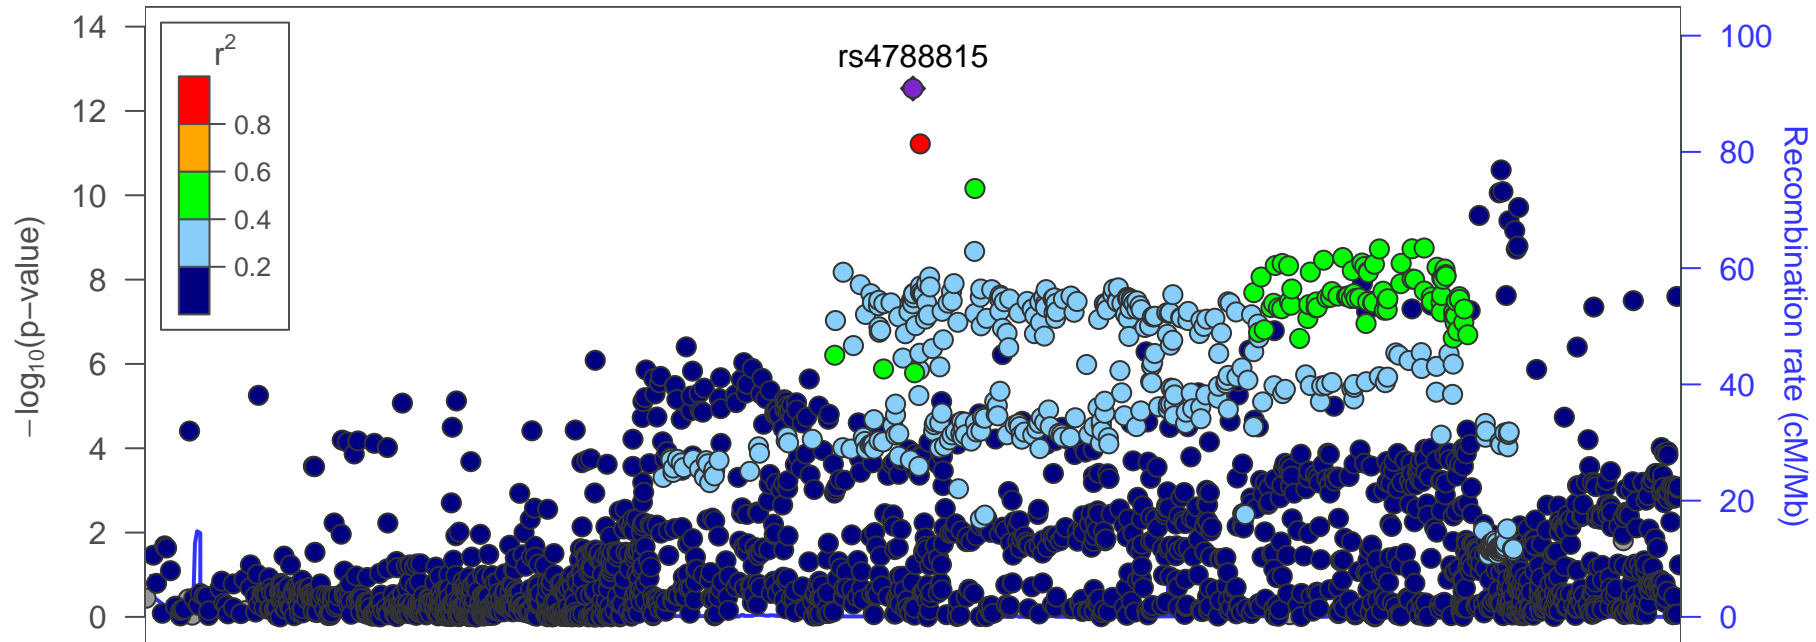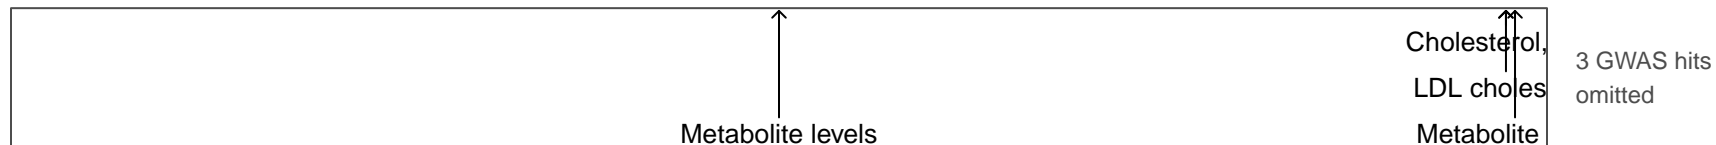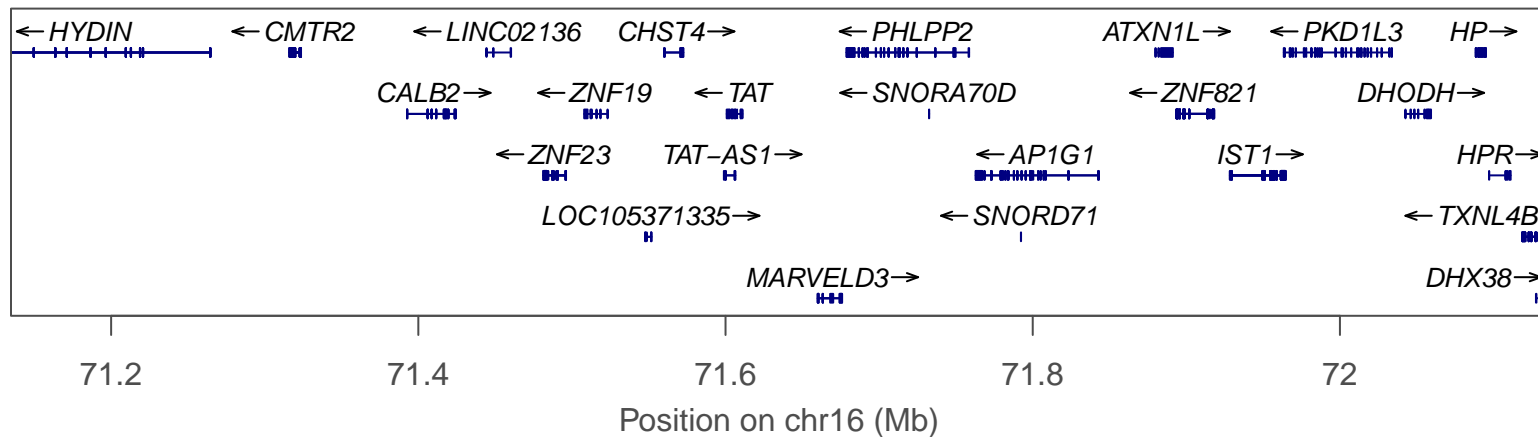

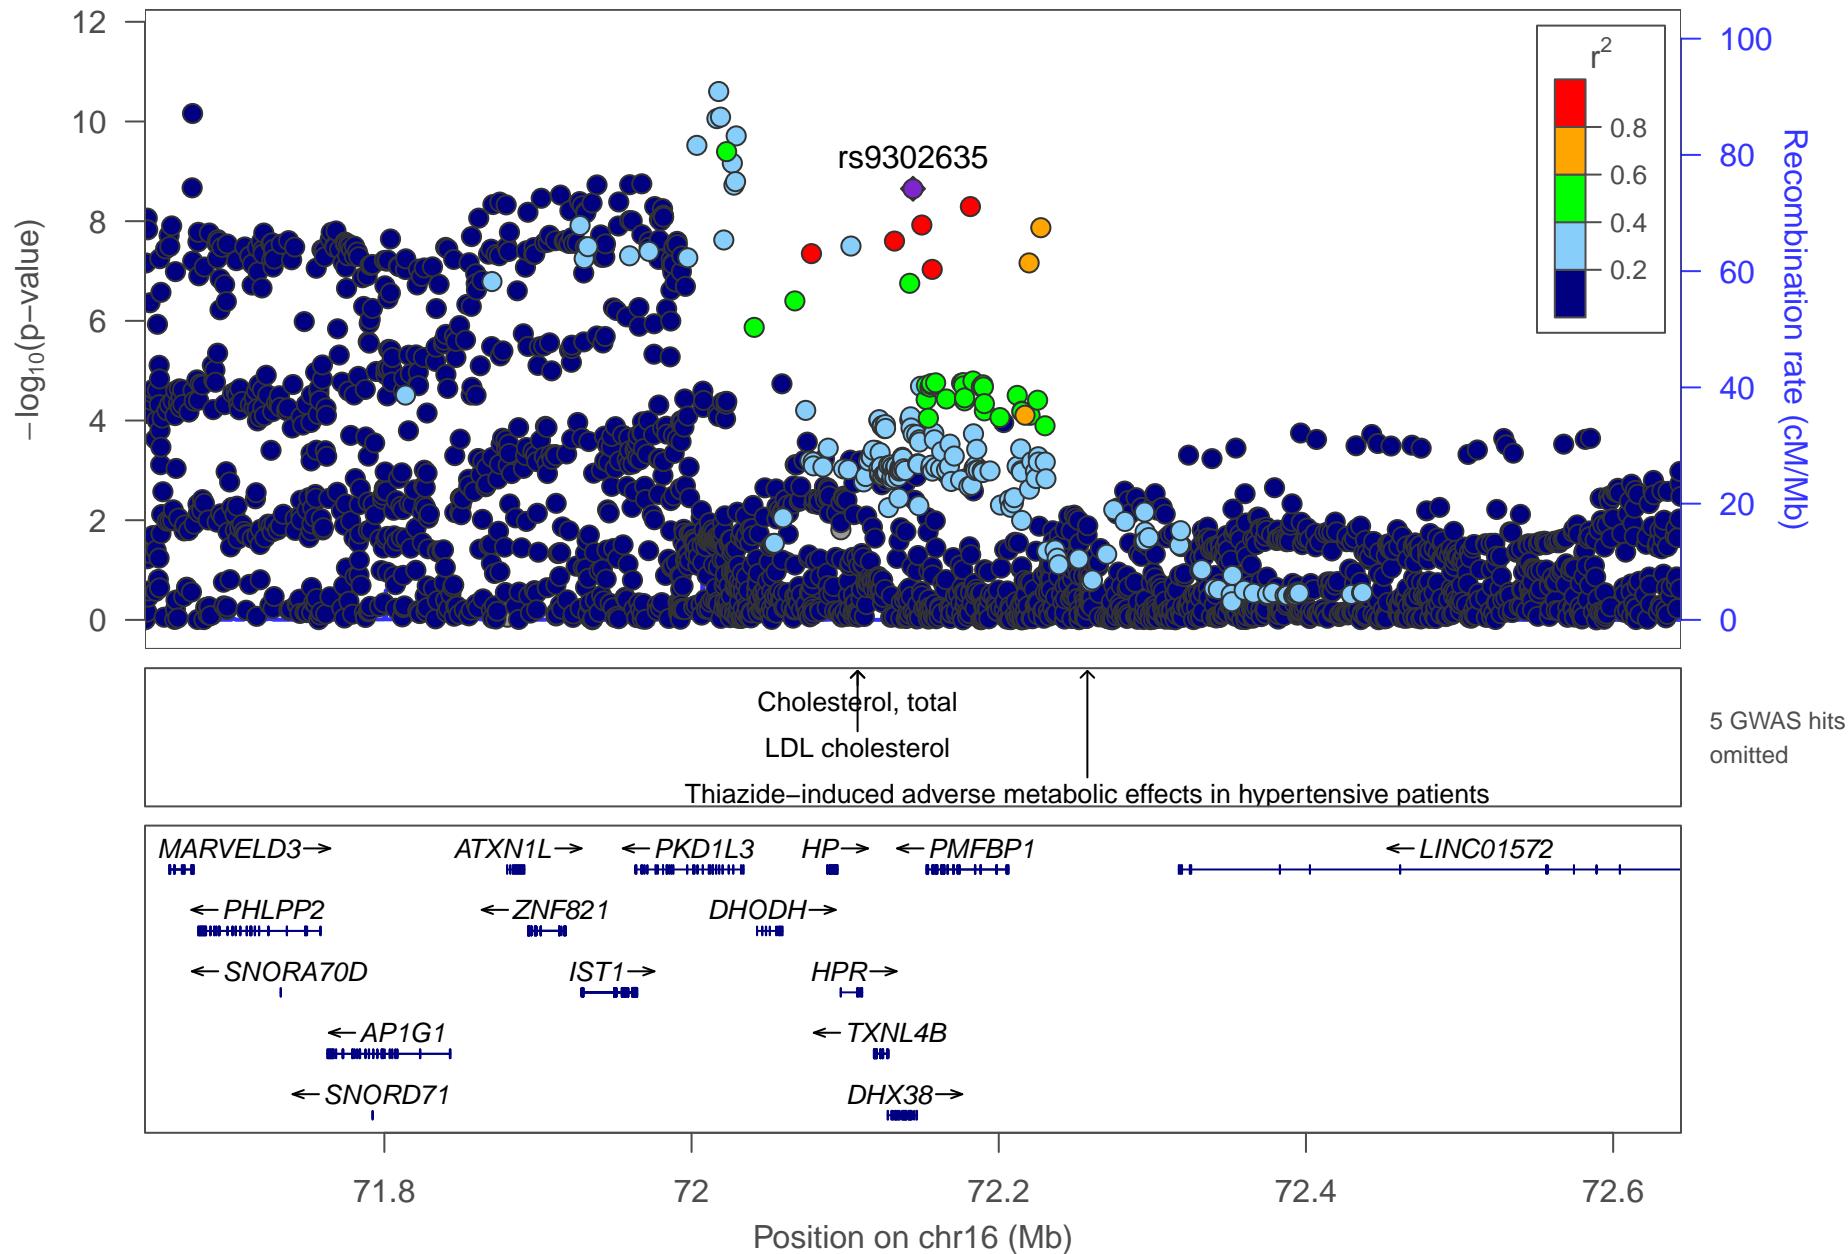

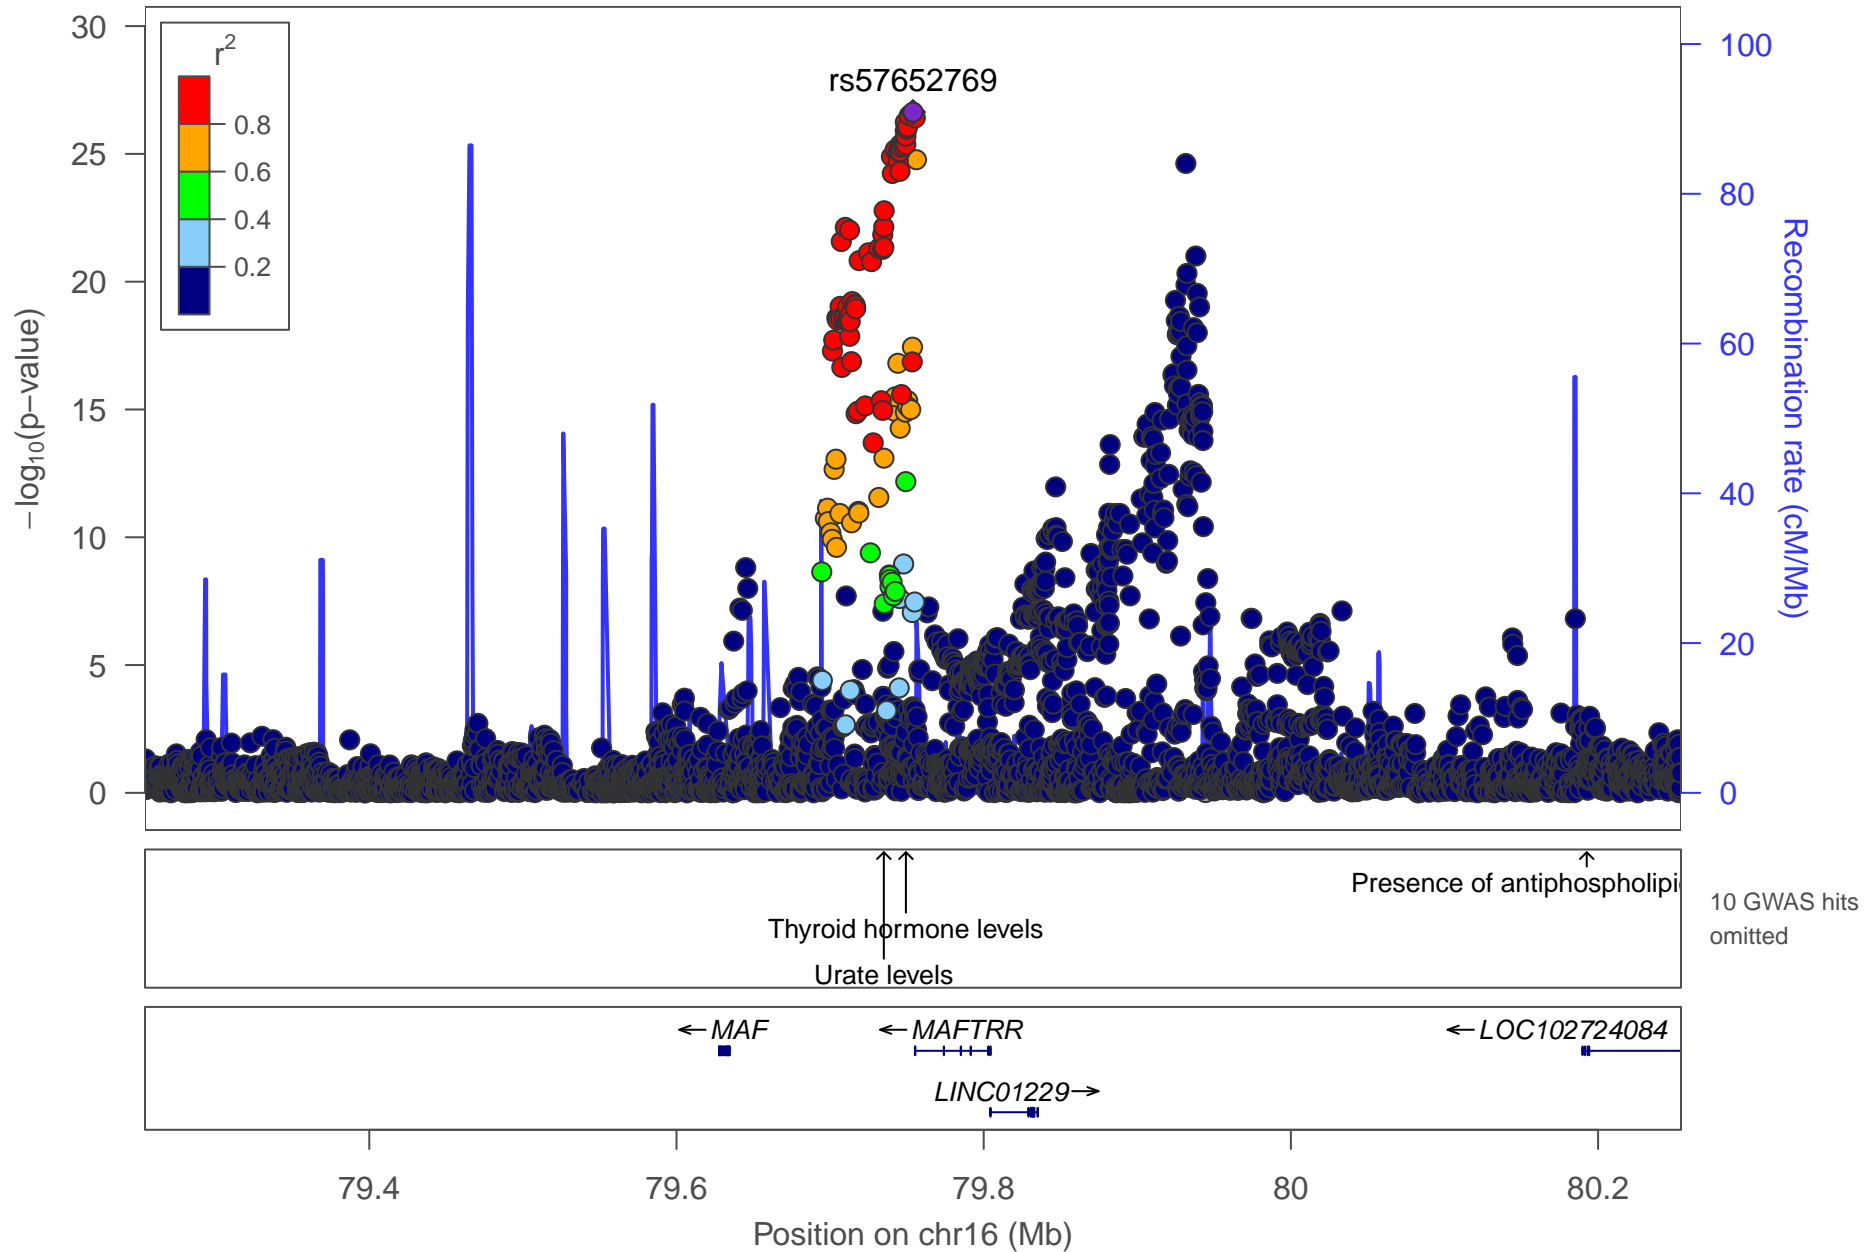

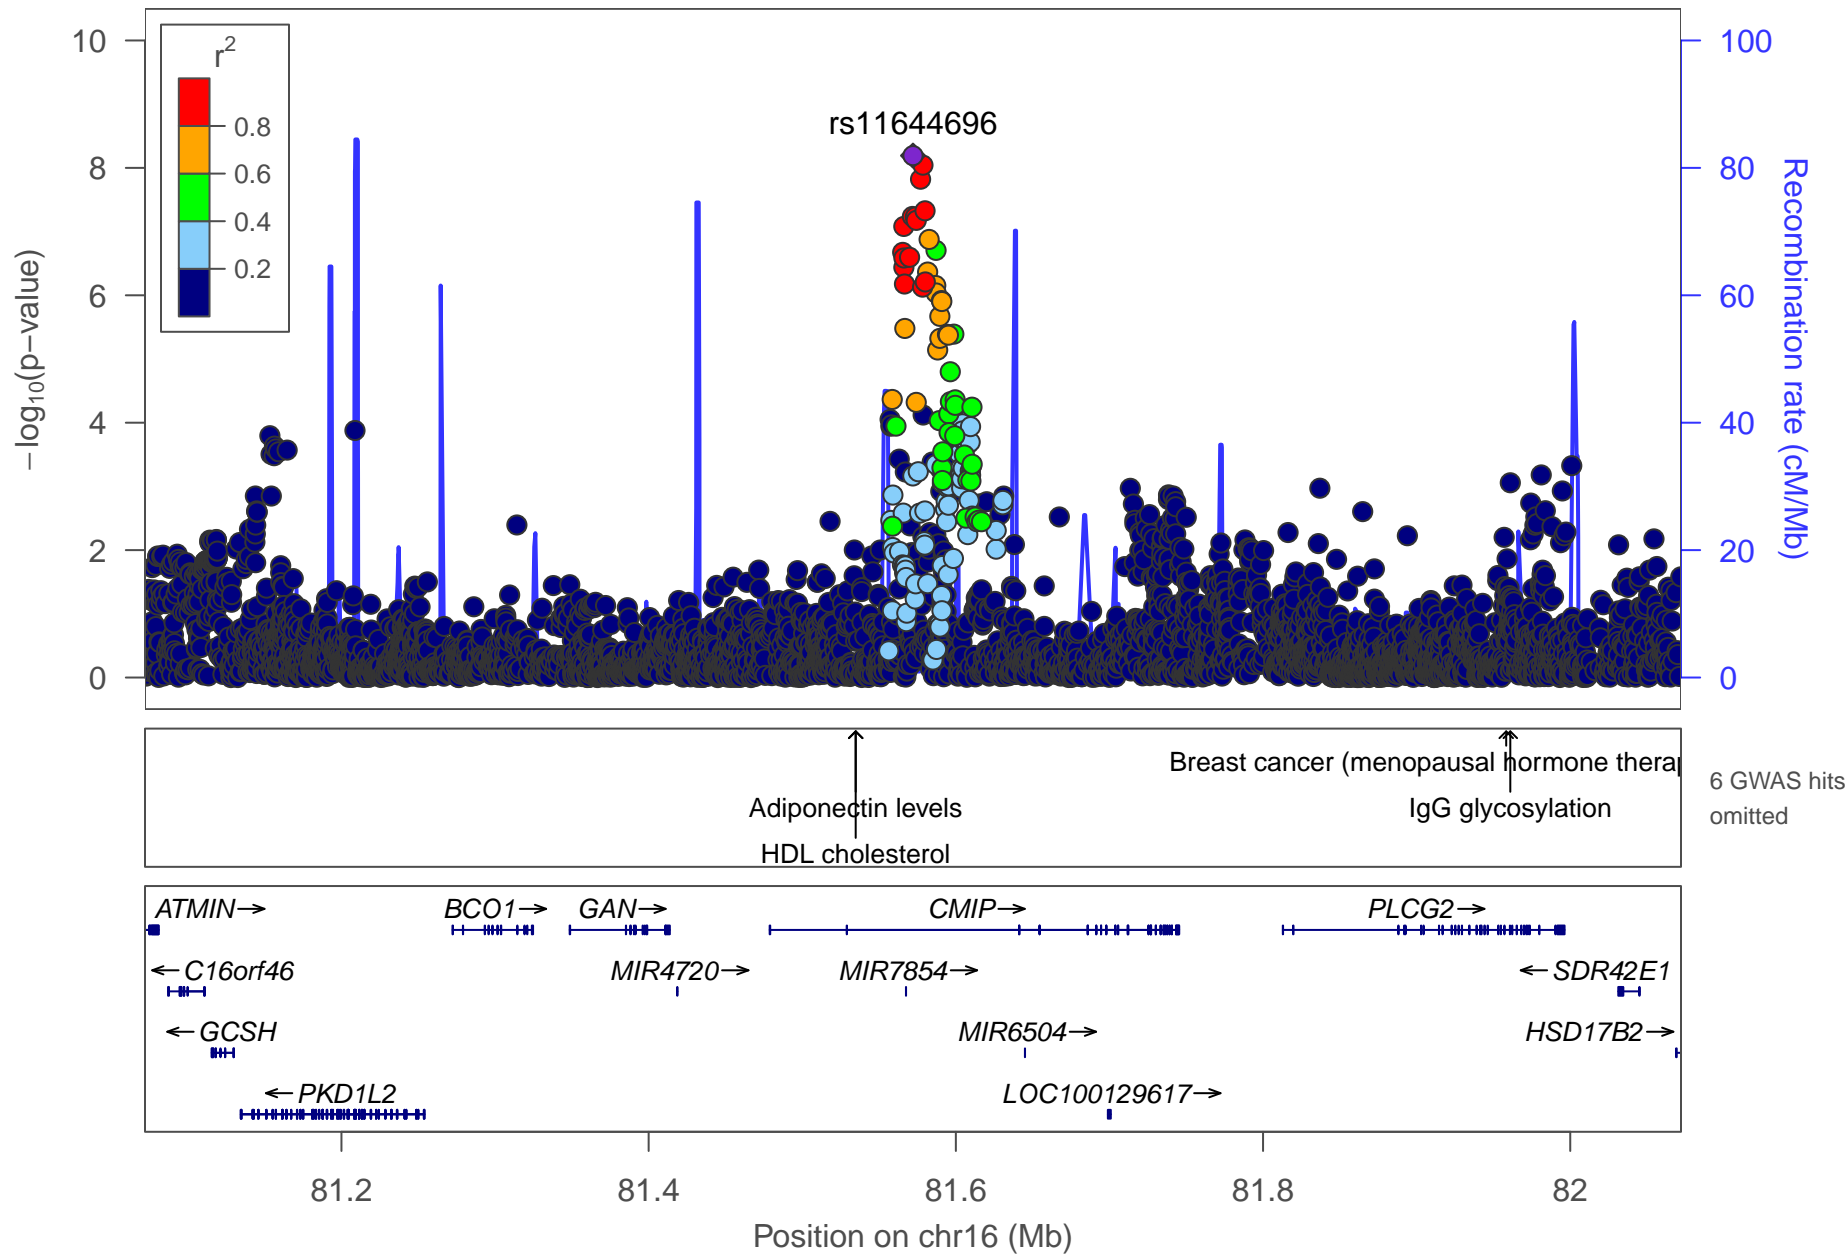



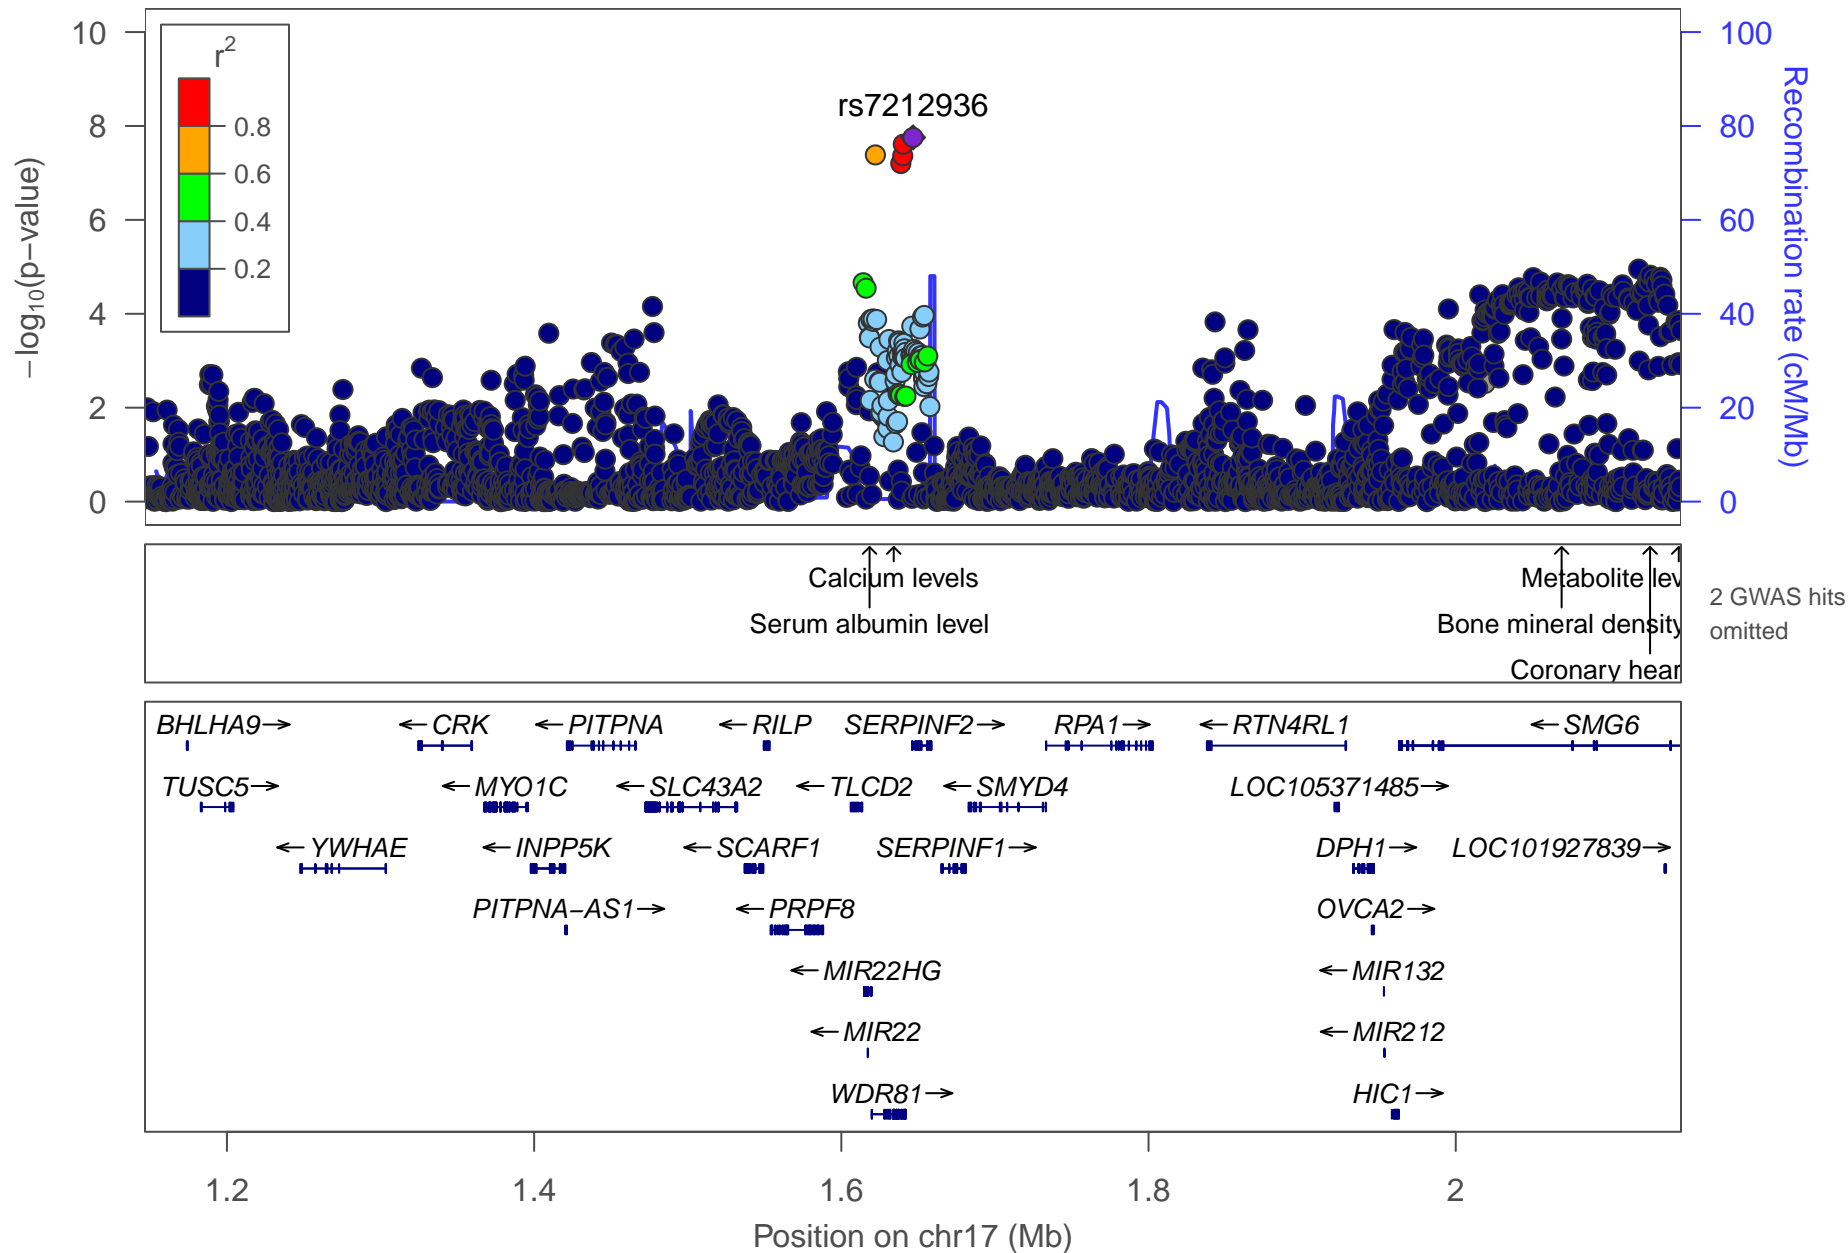

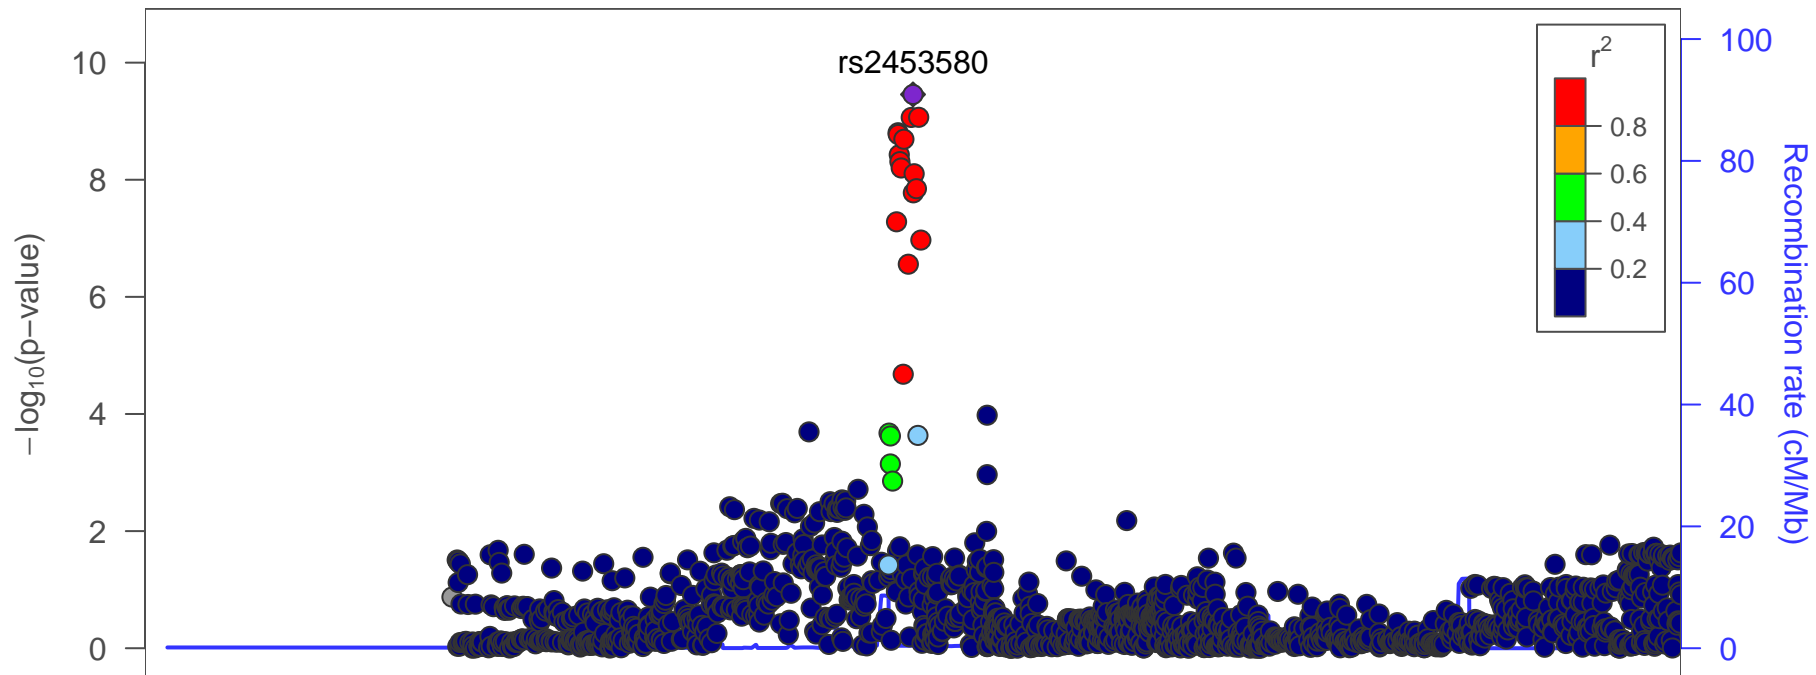

↑  
Platelet counts

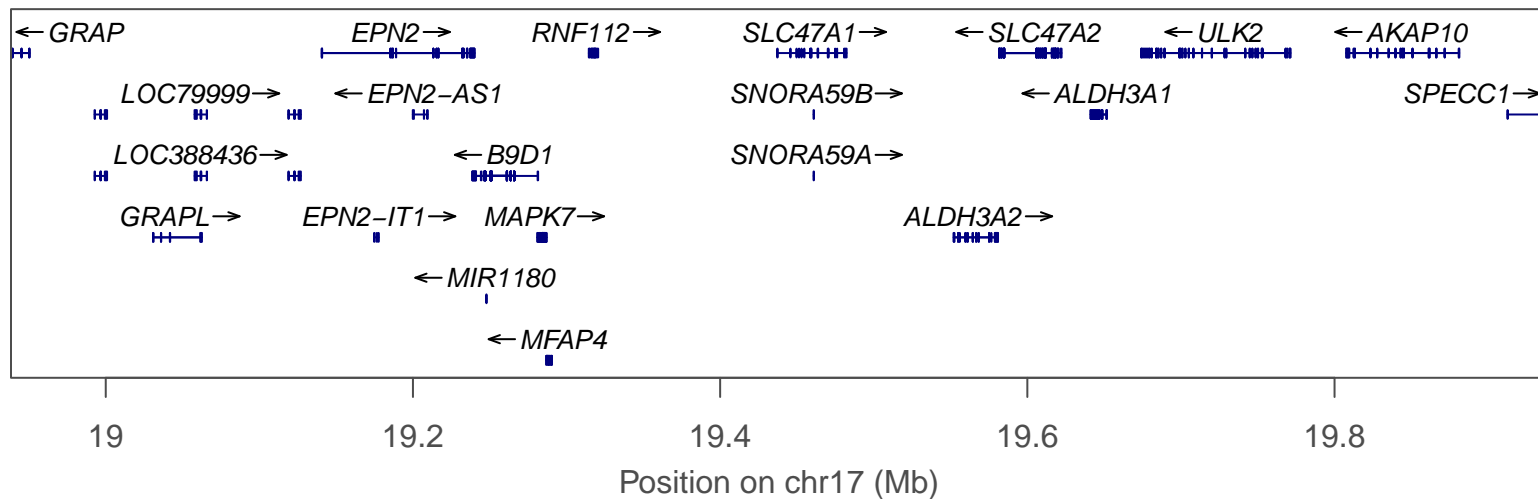

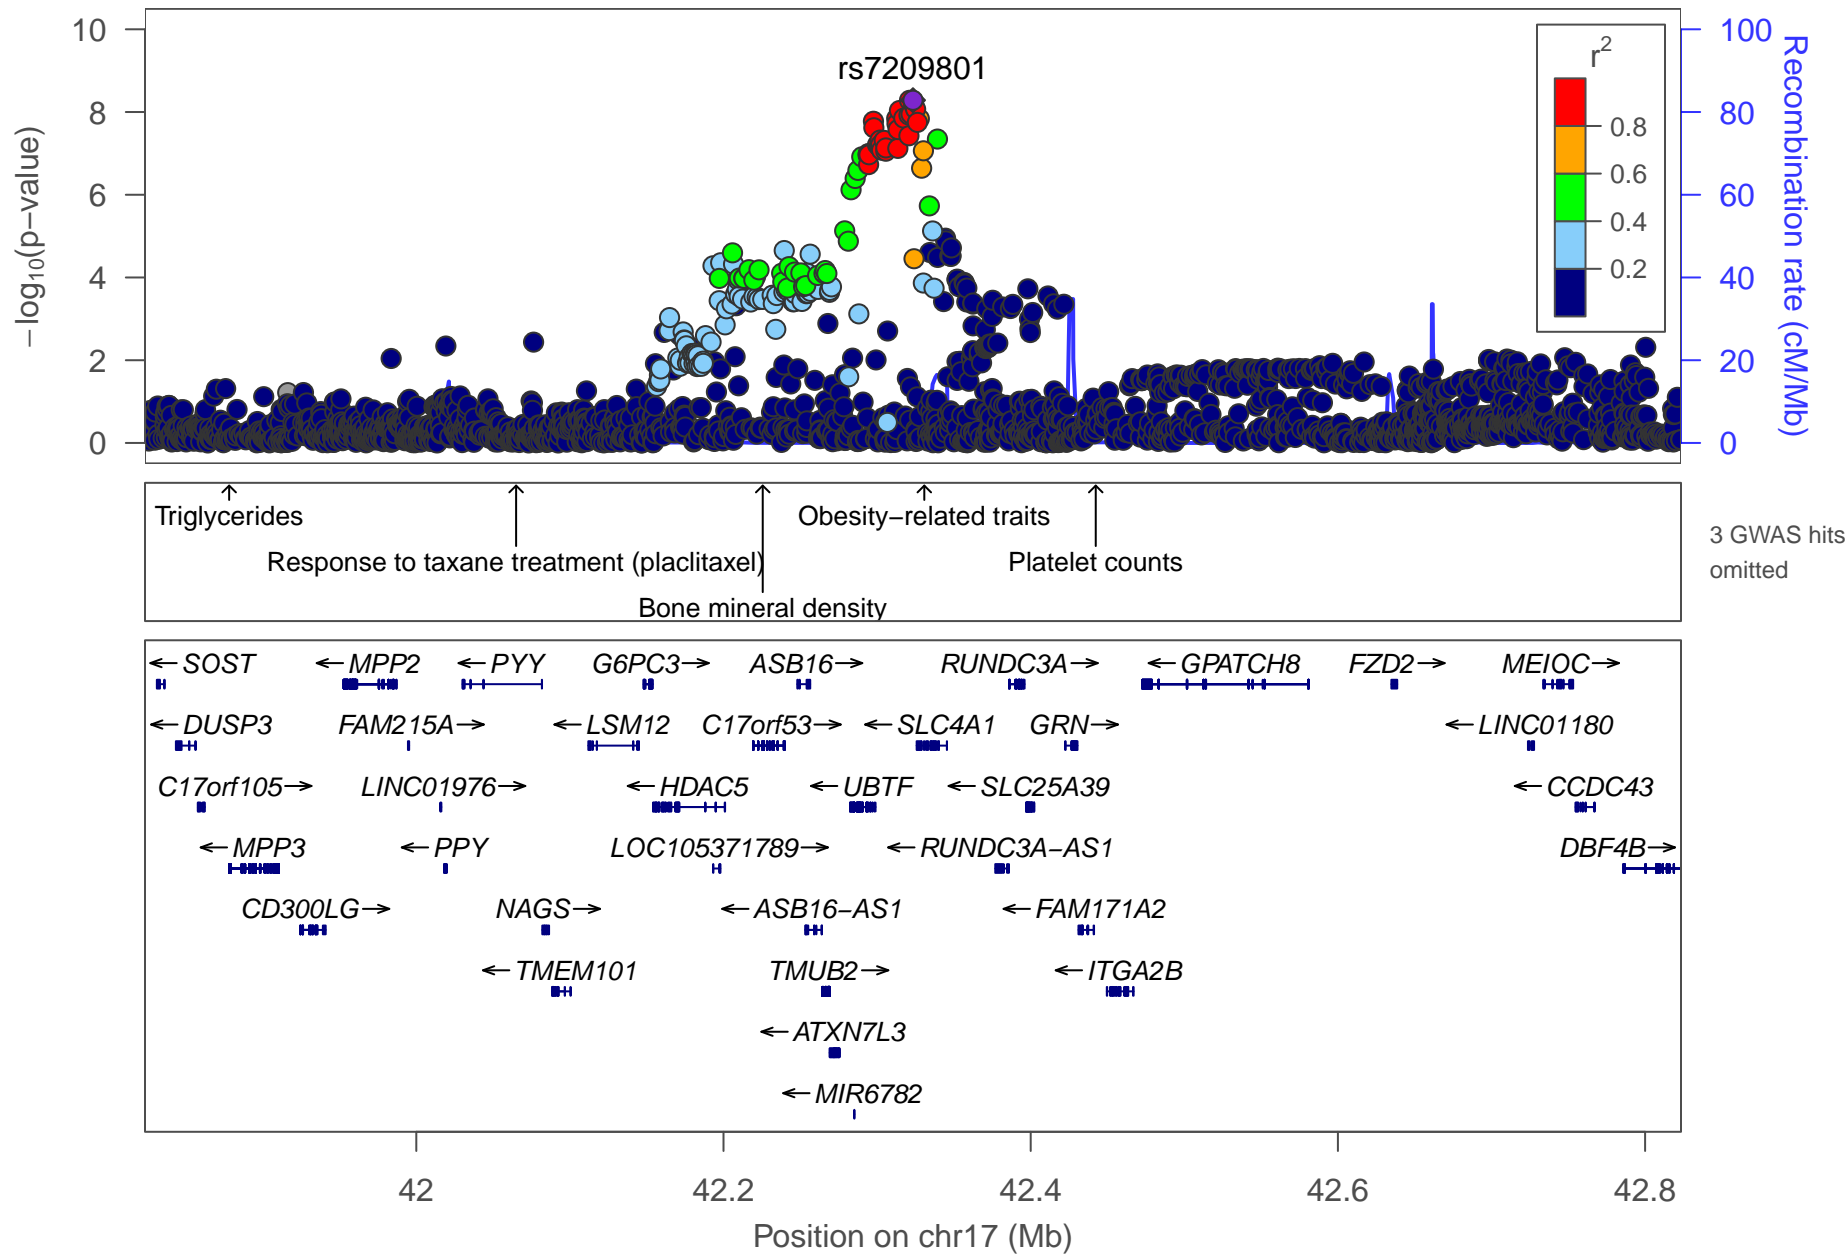

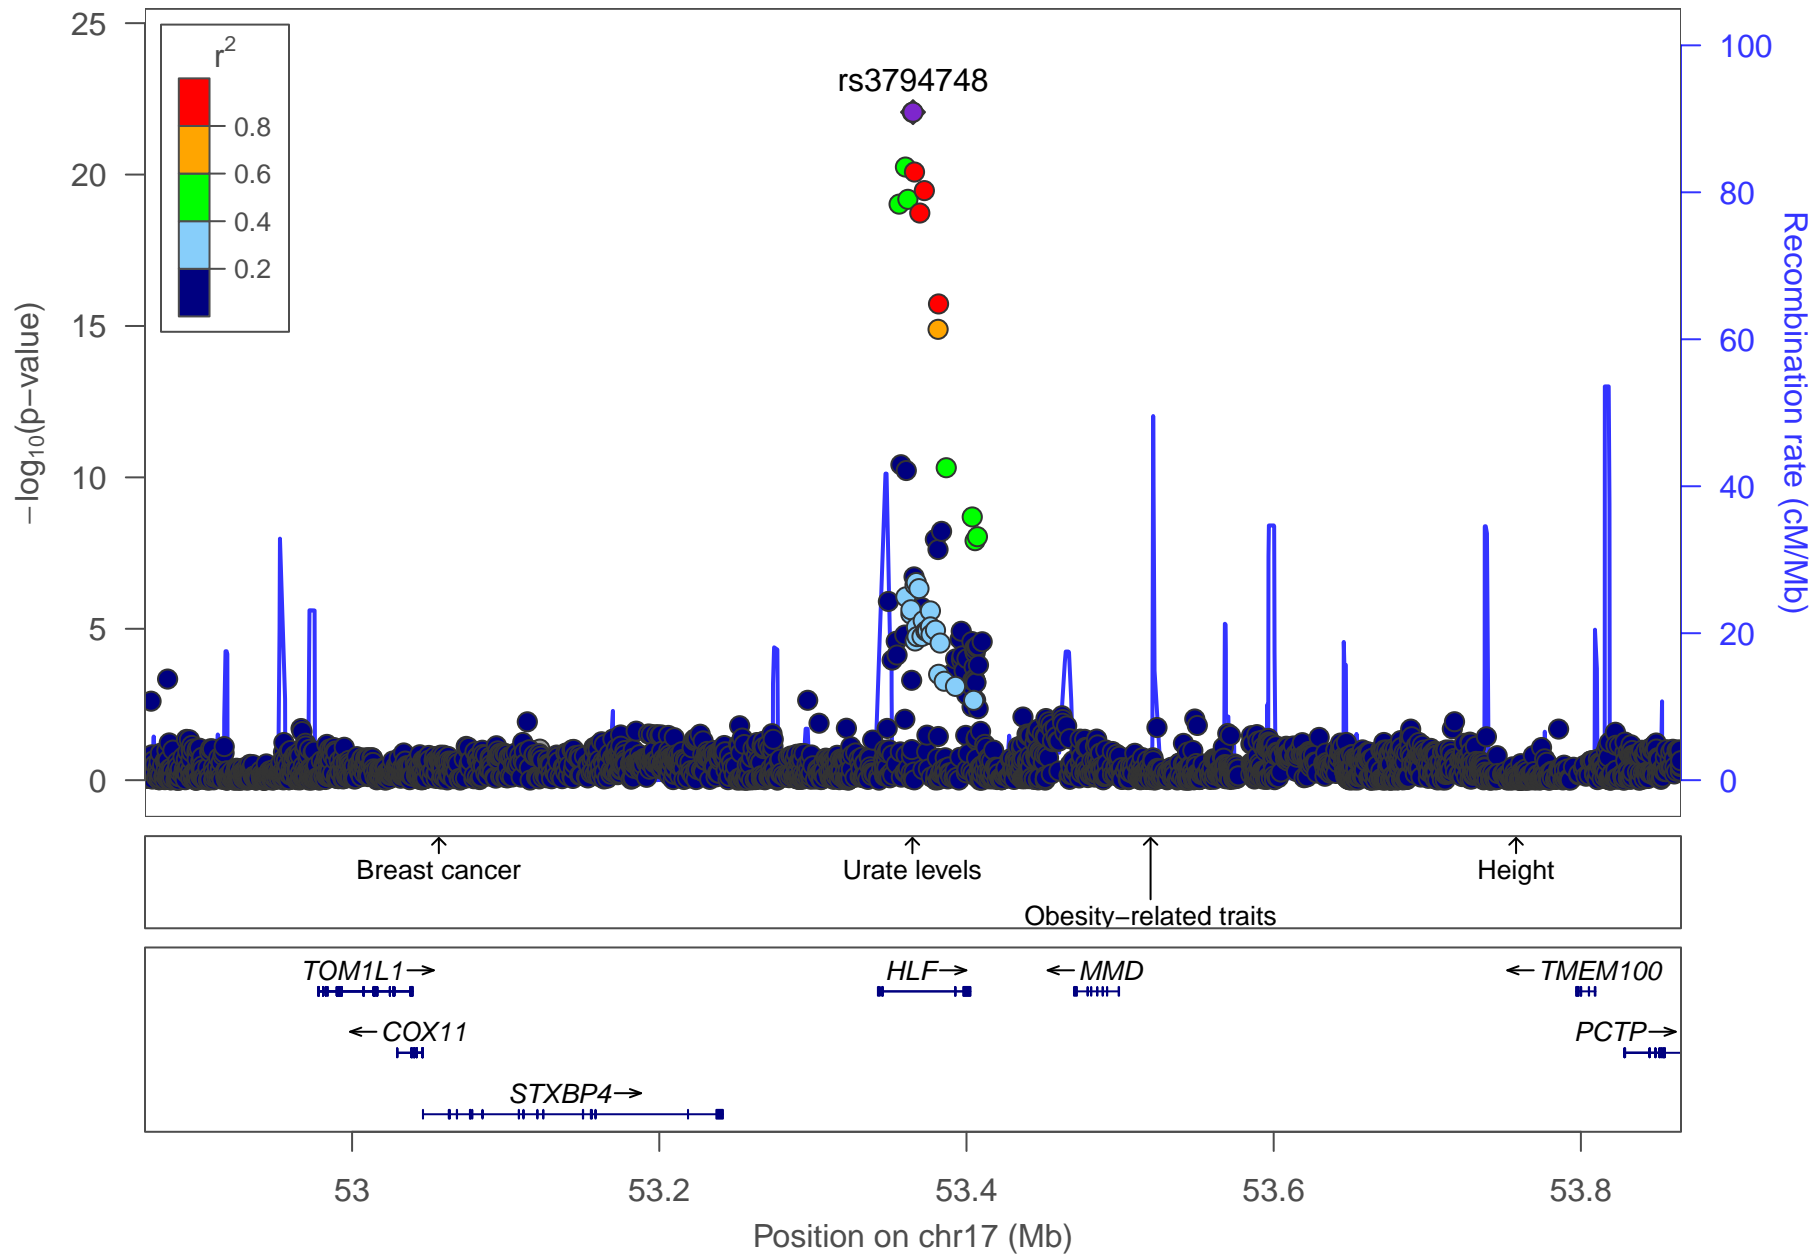

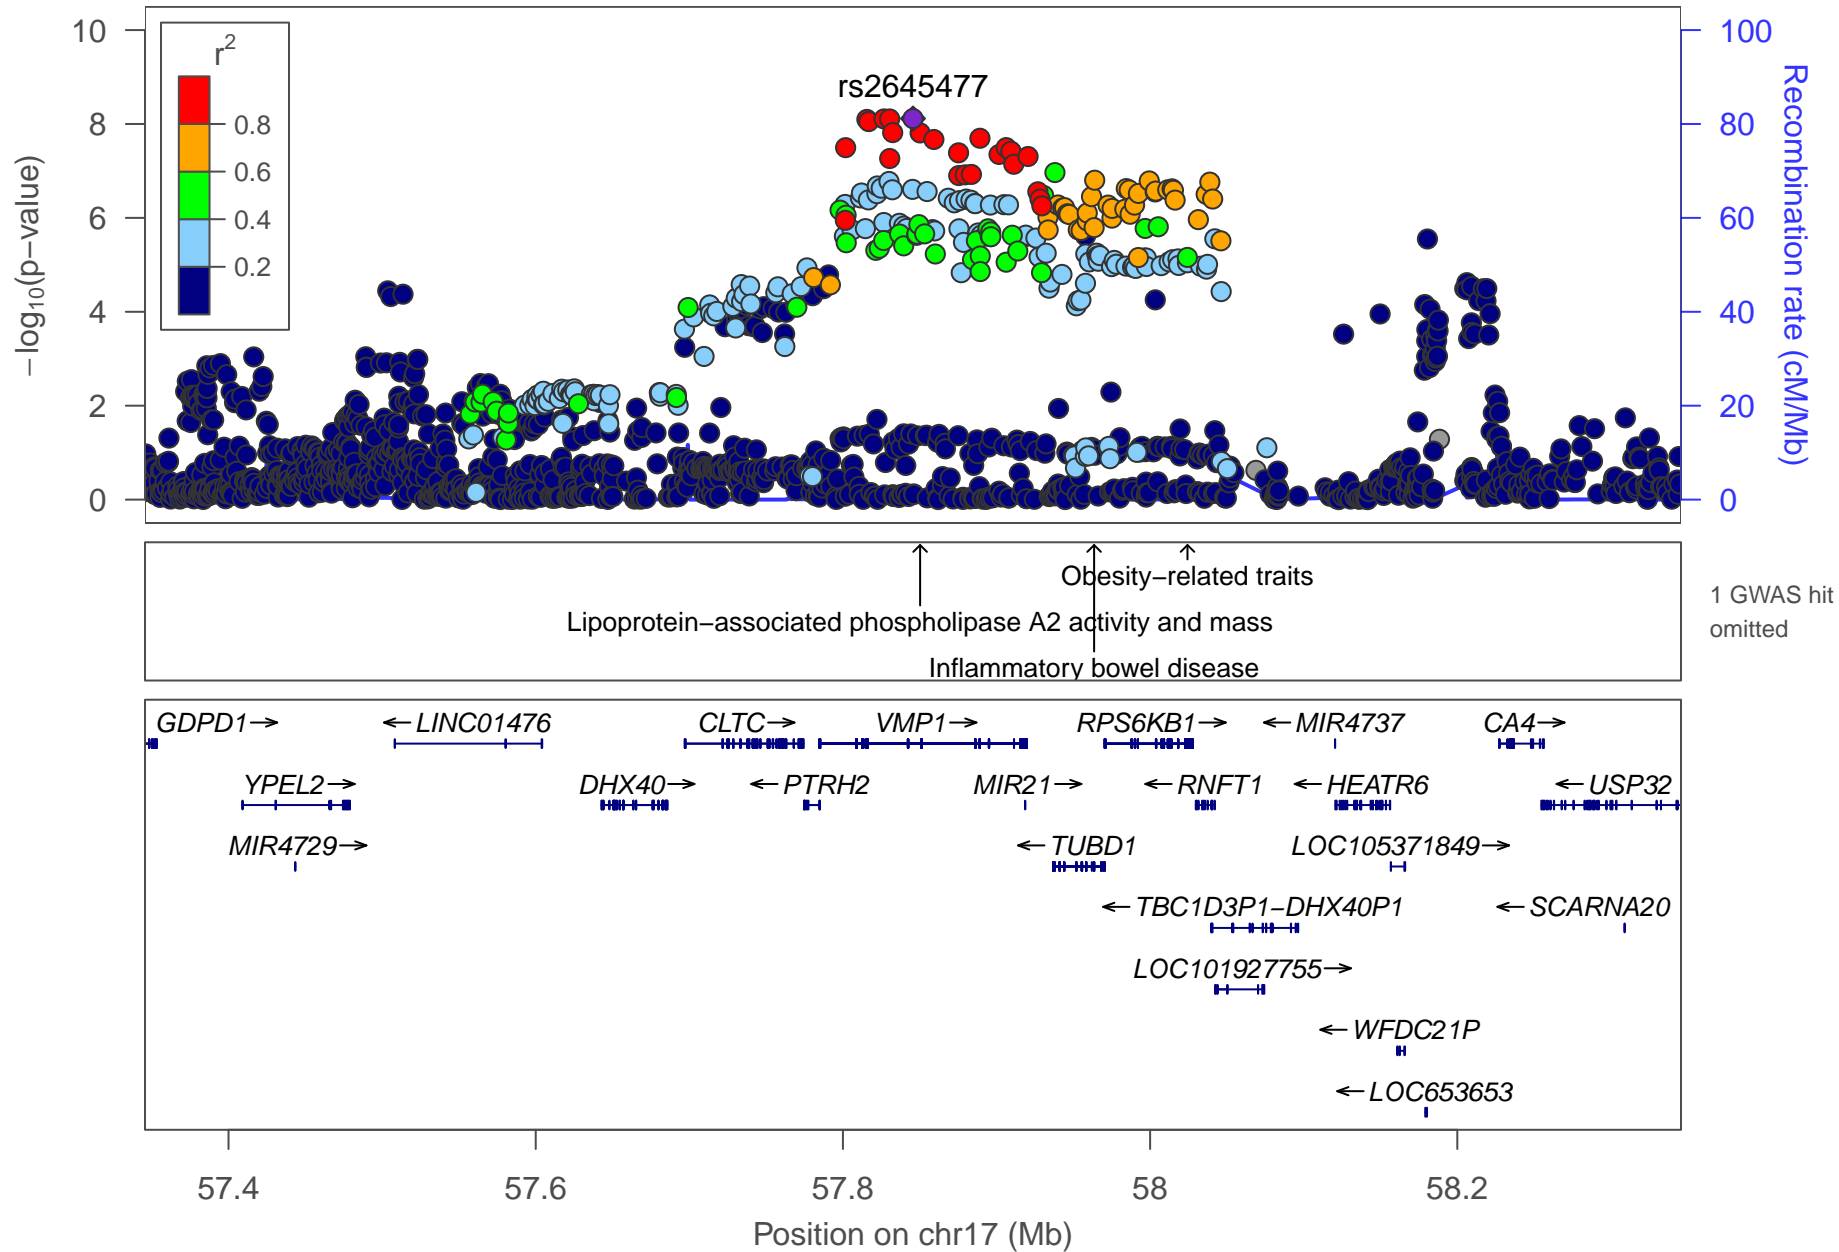

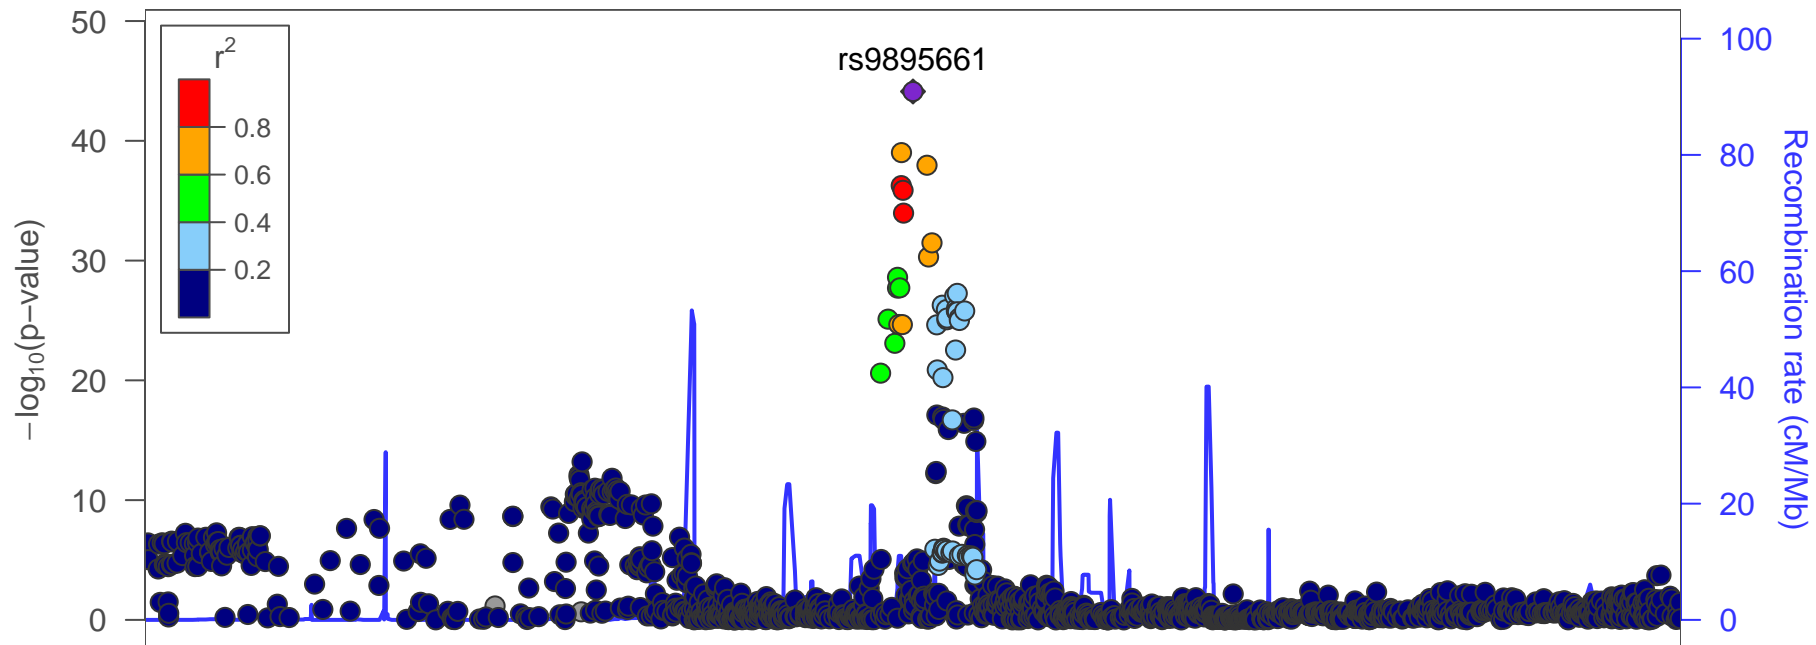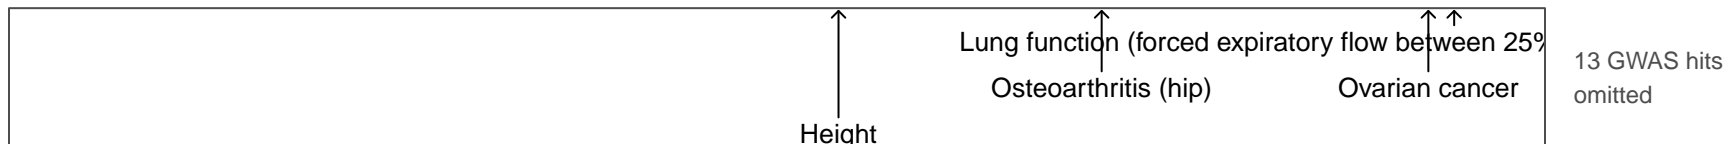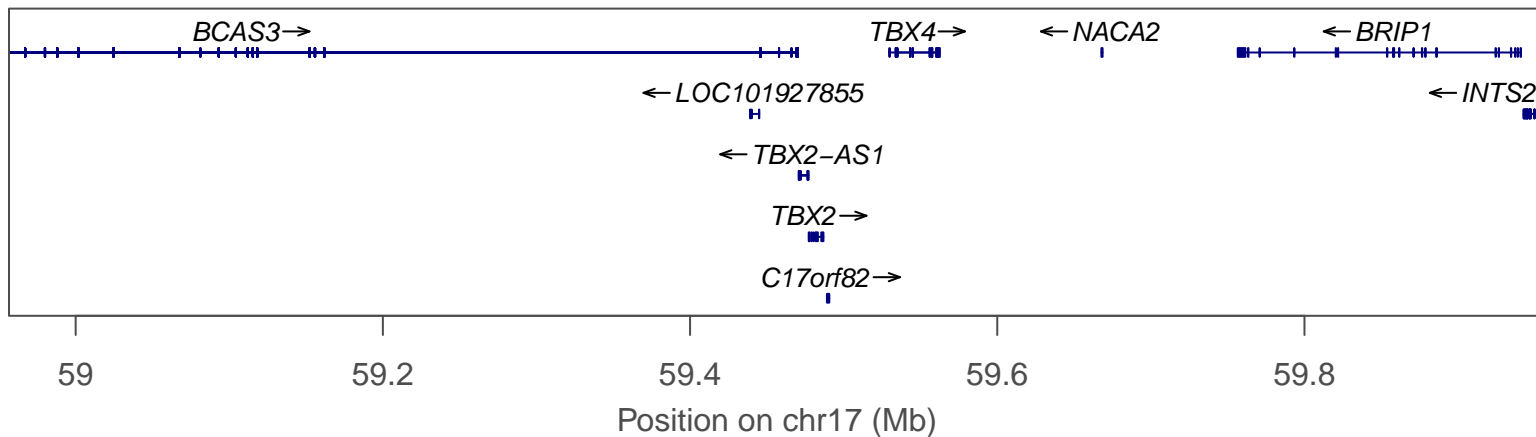

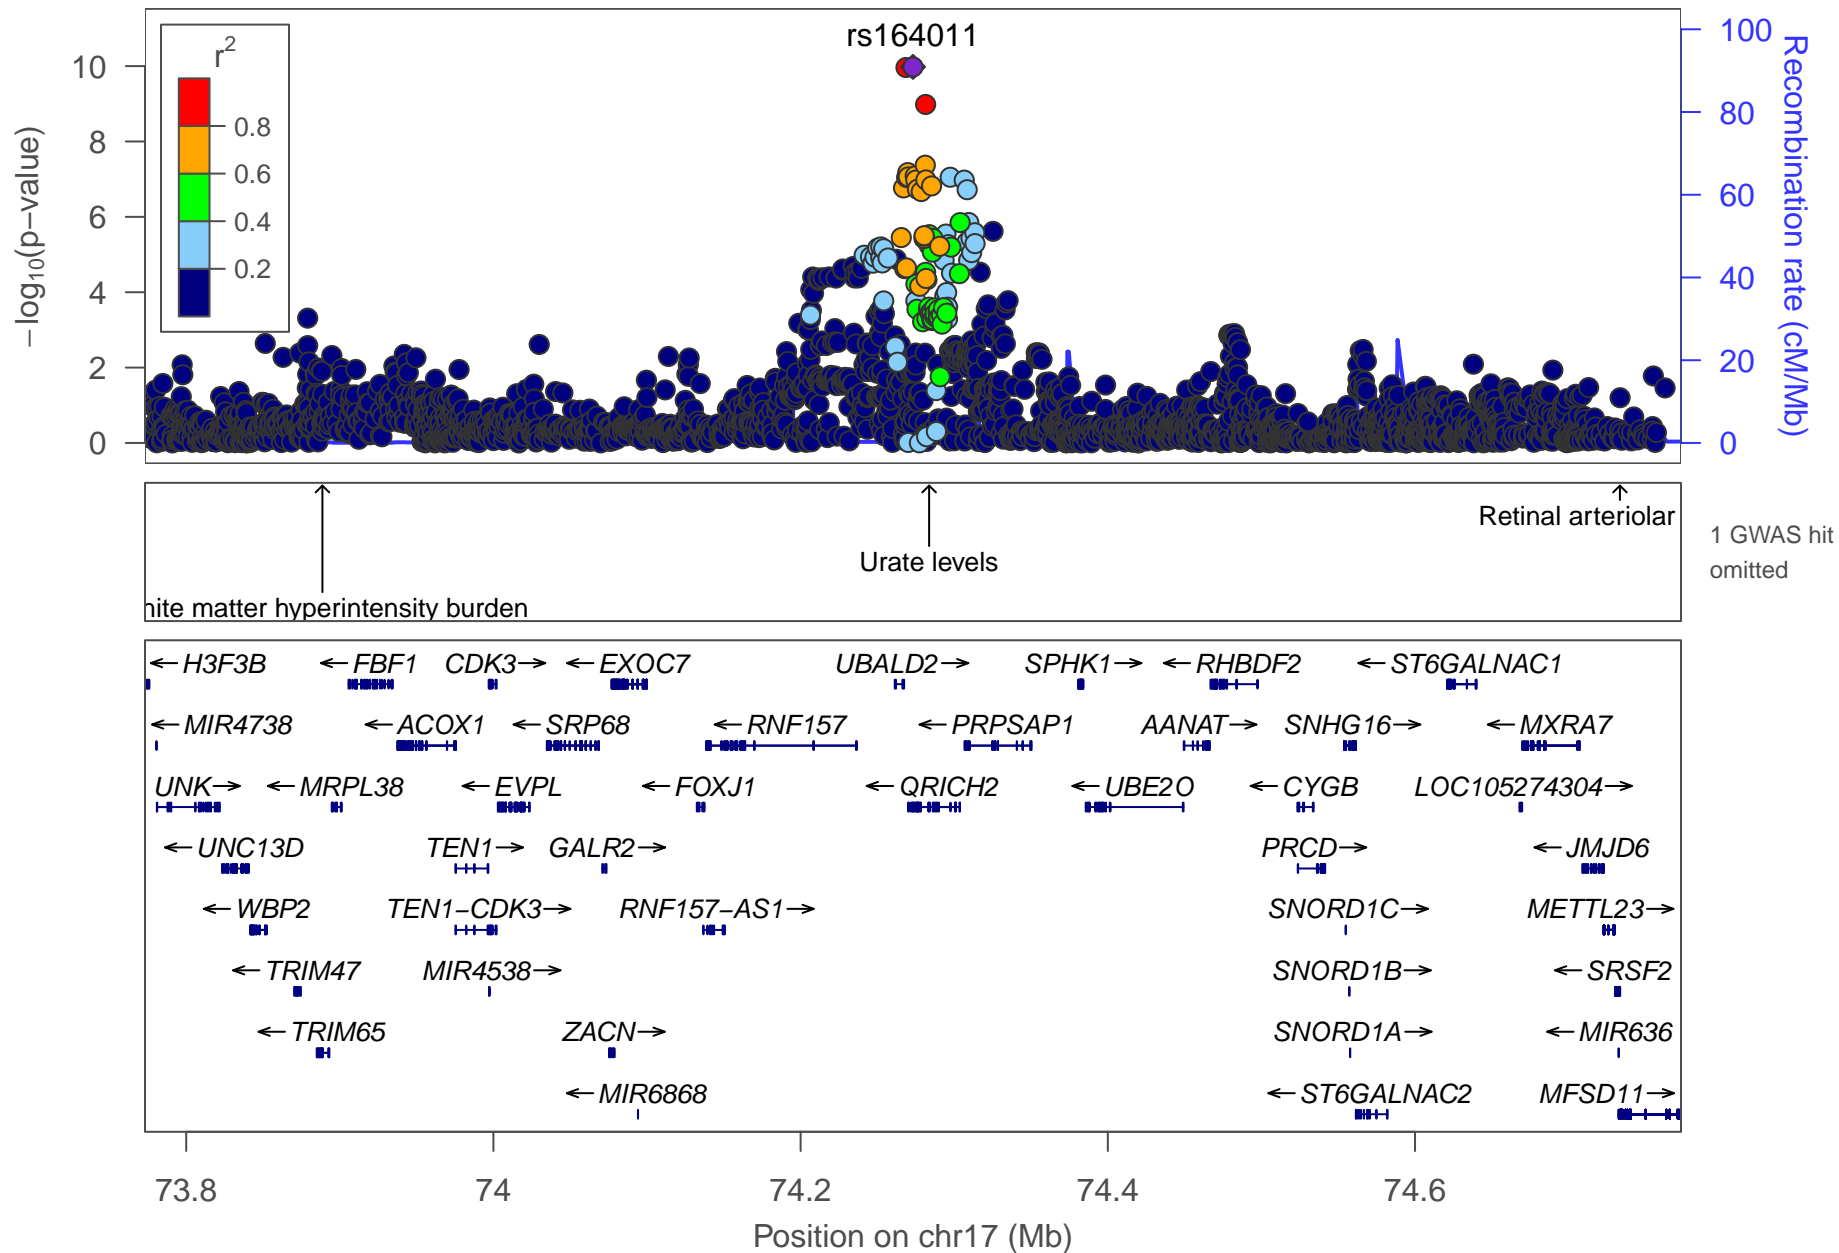

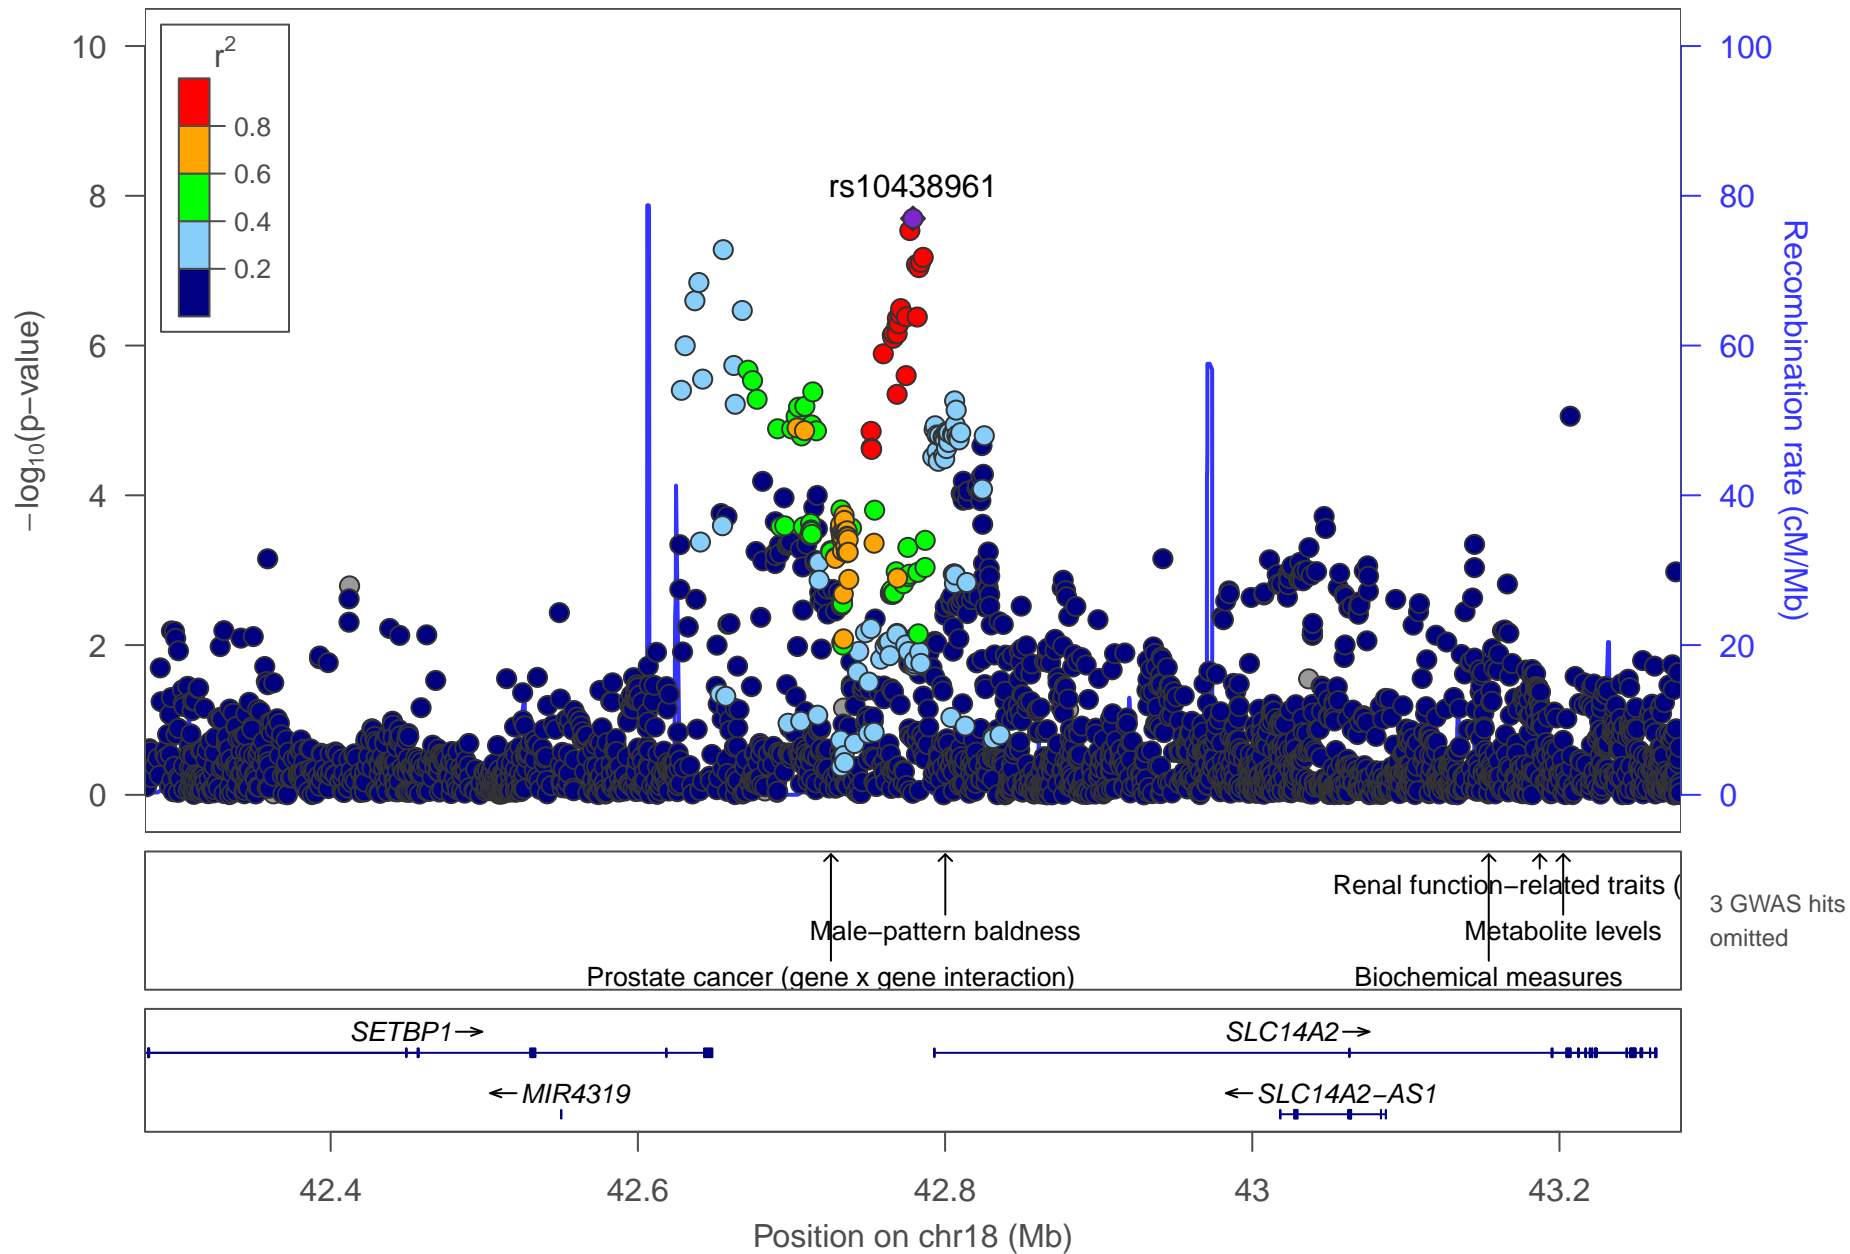



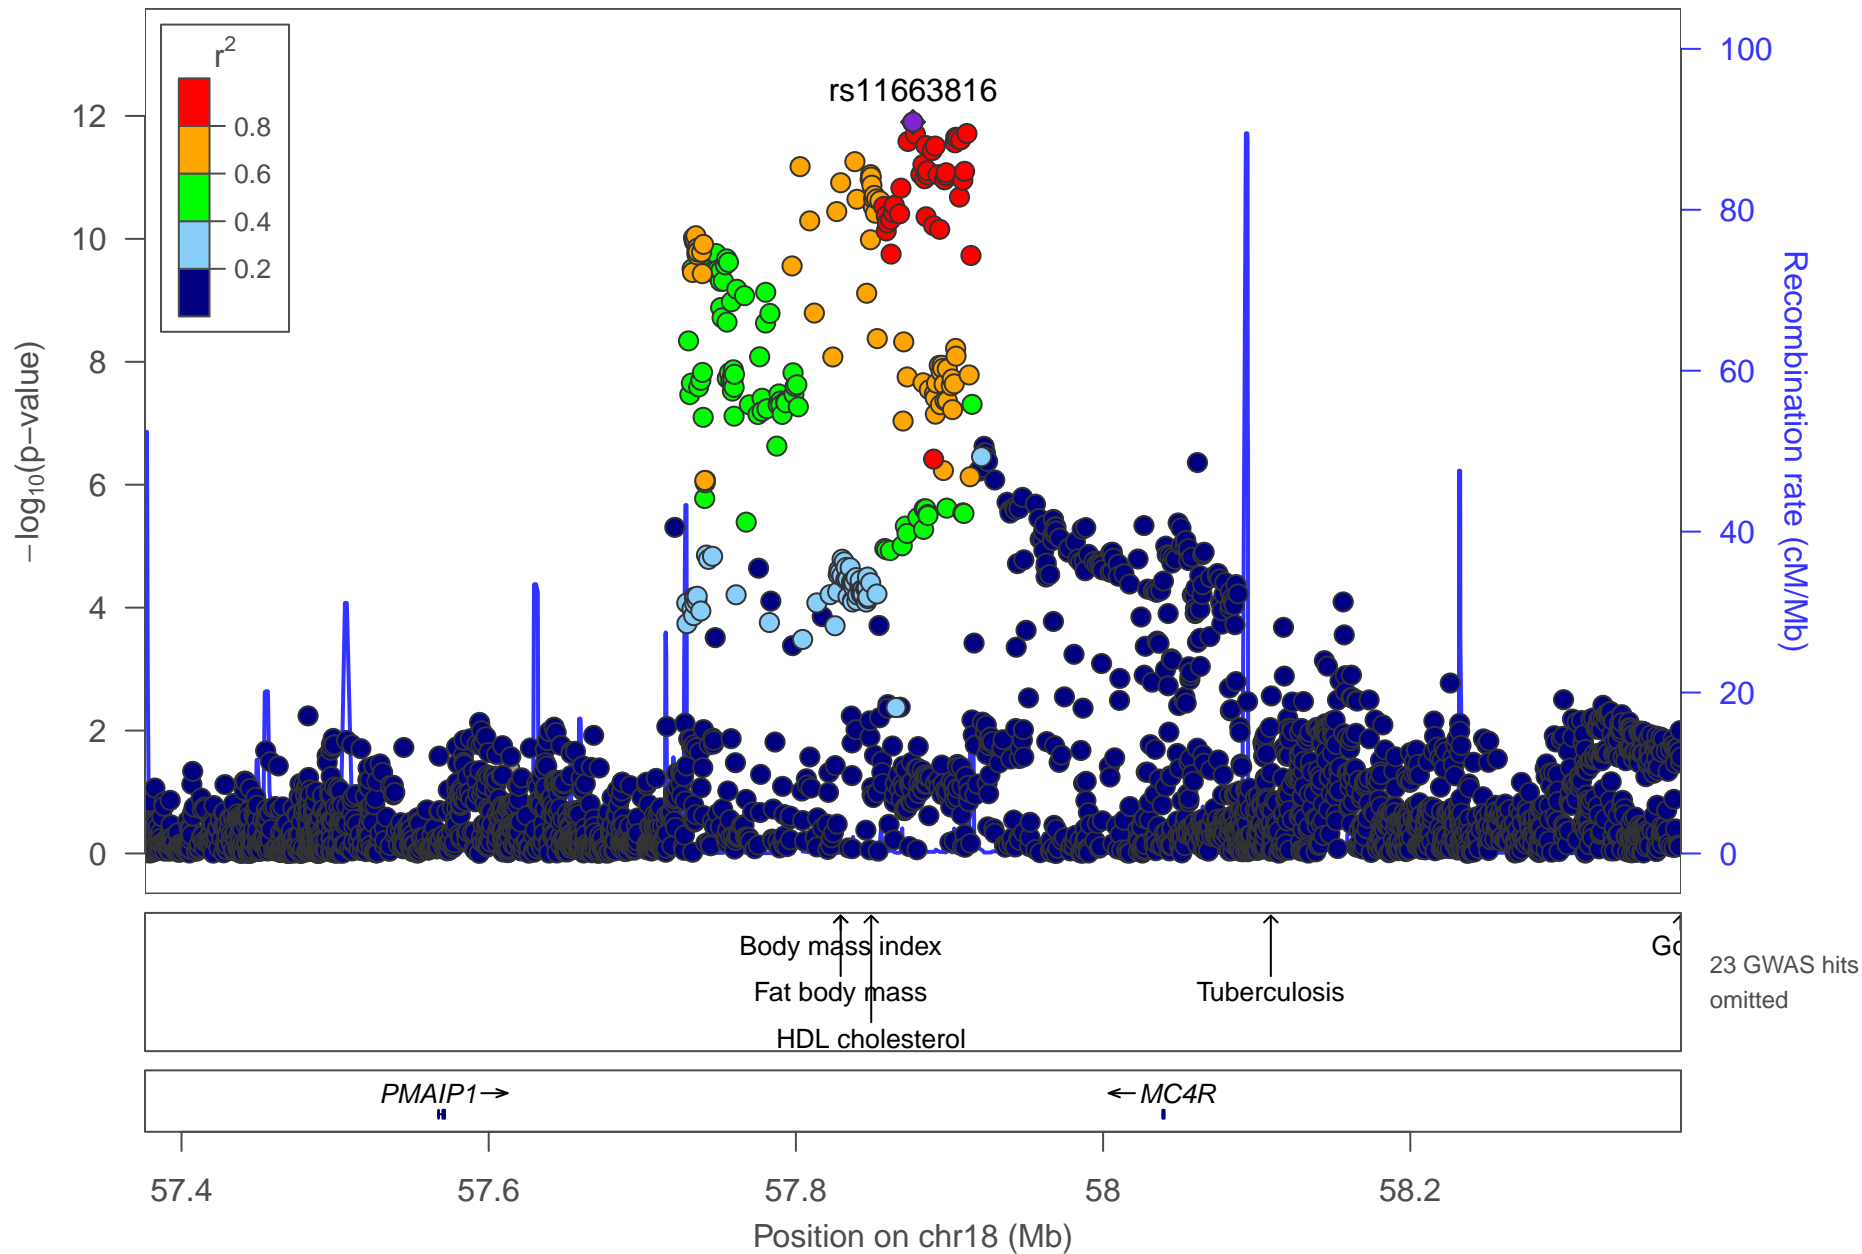

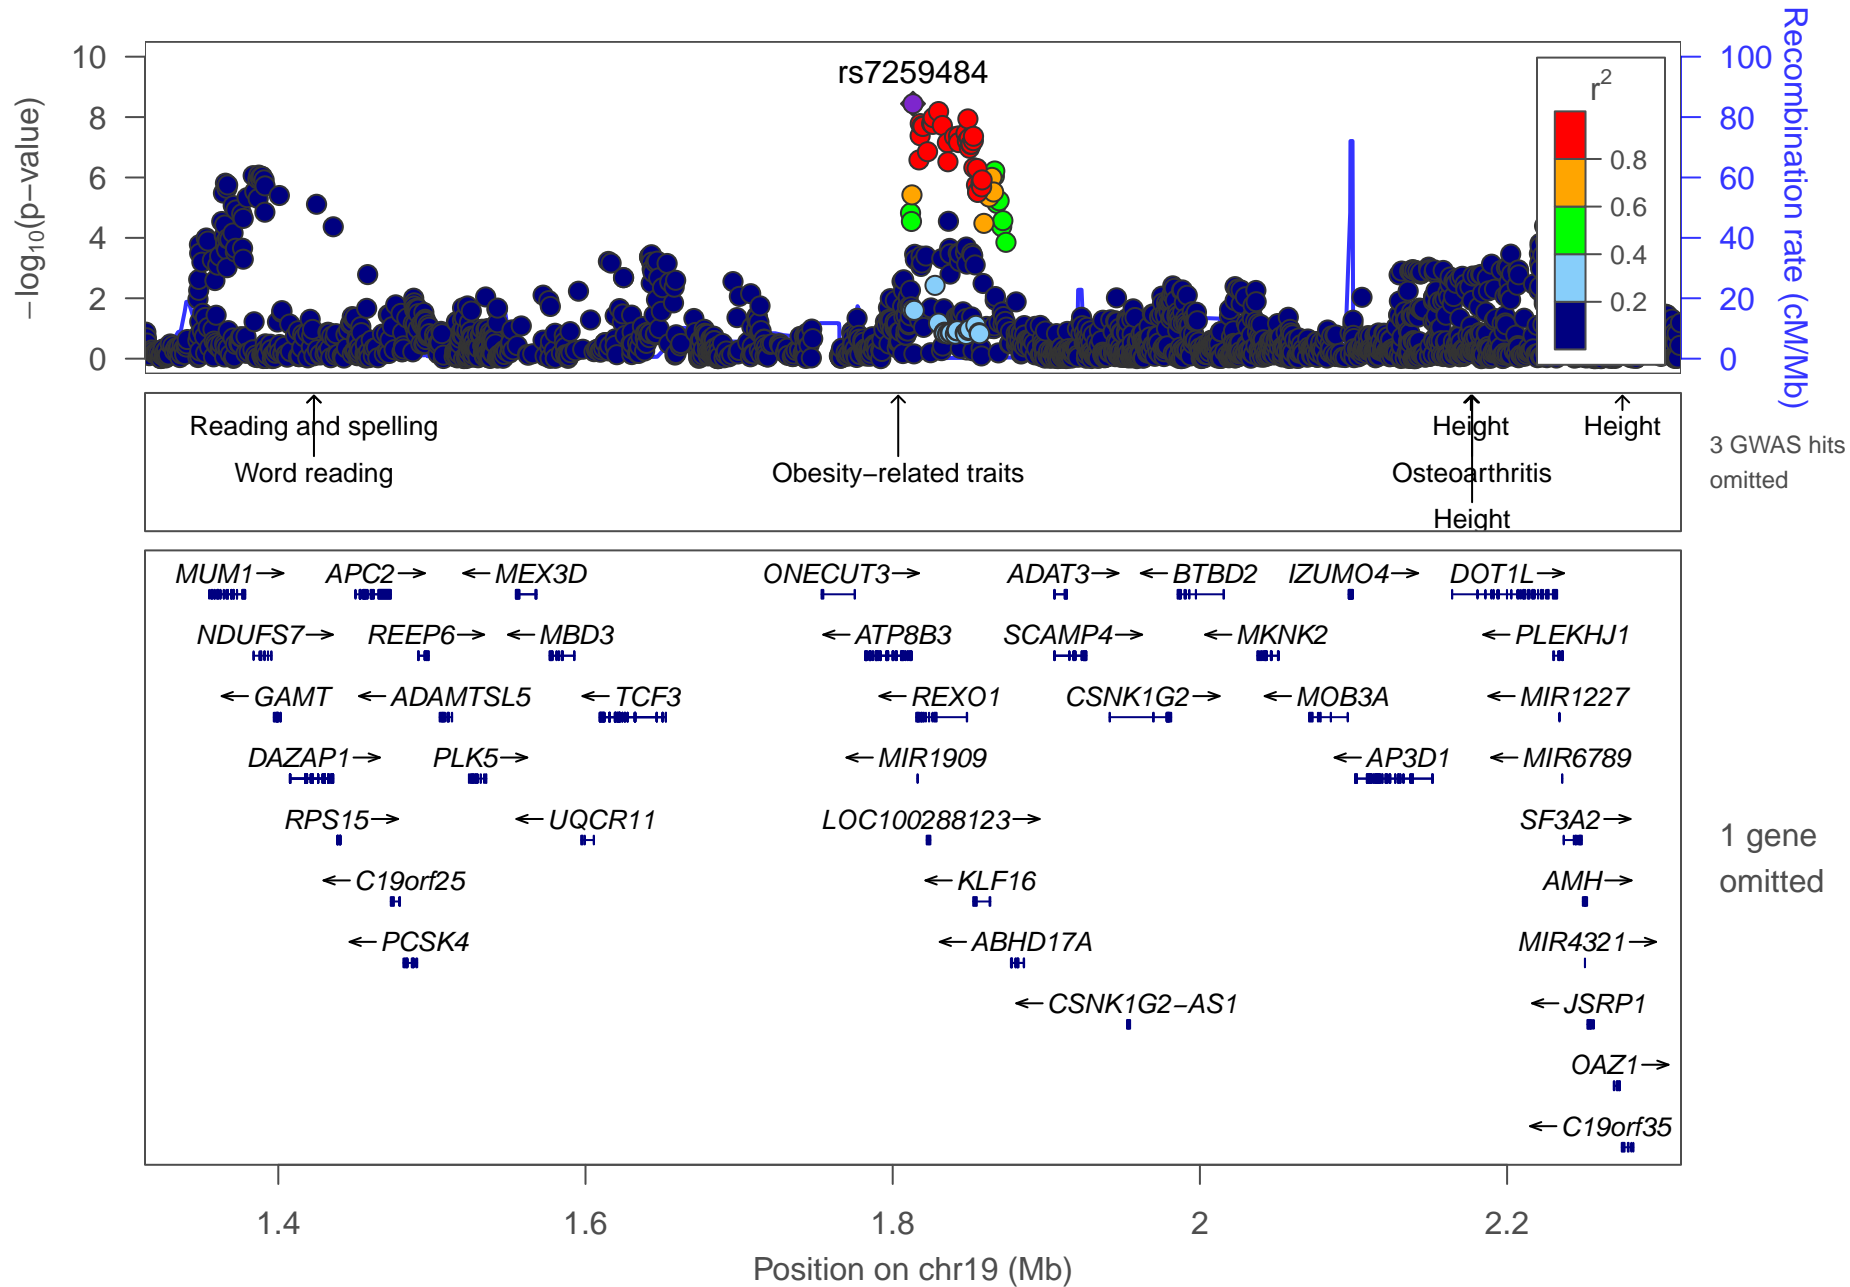

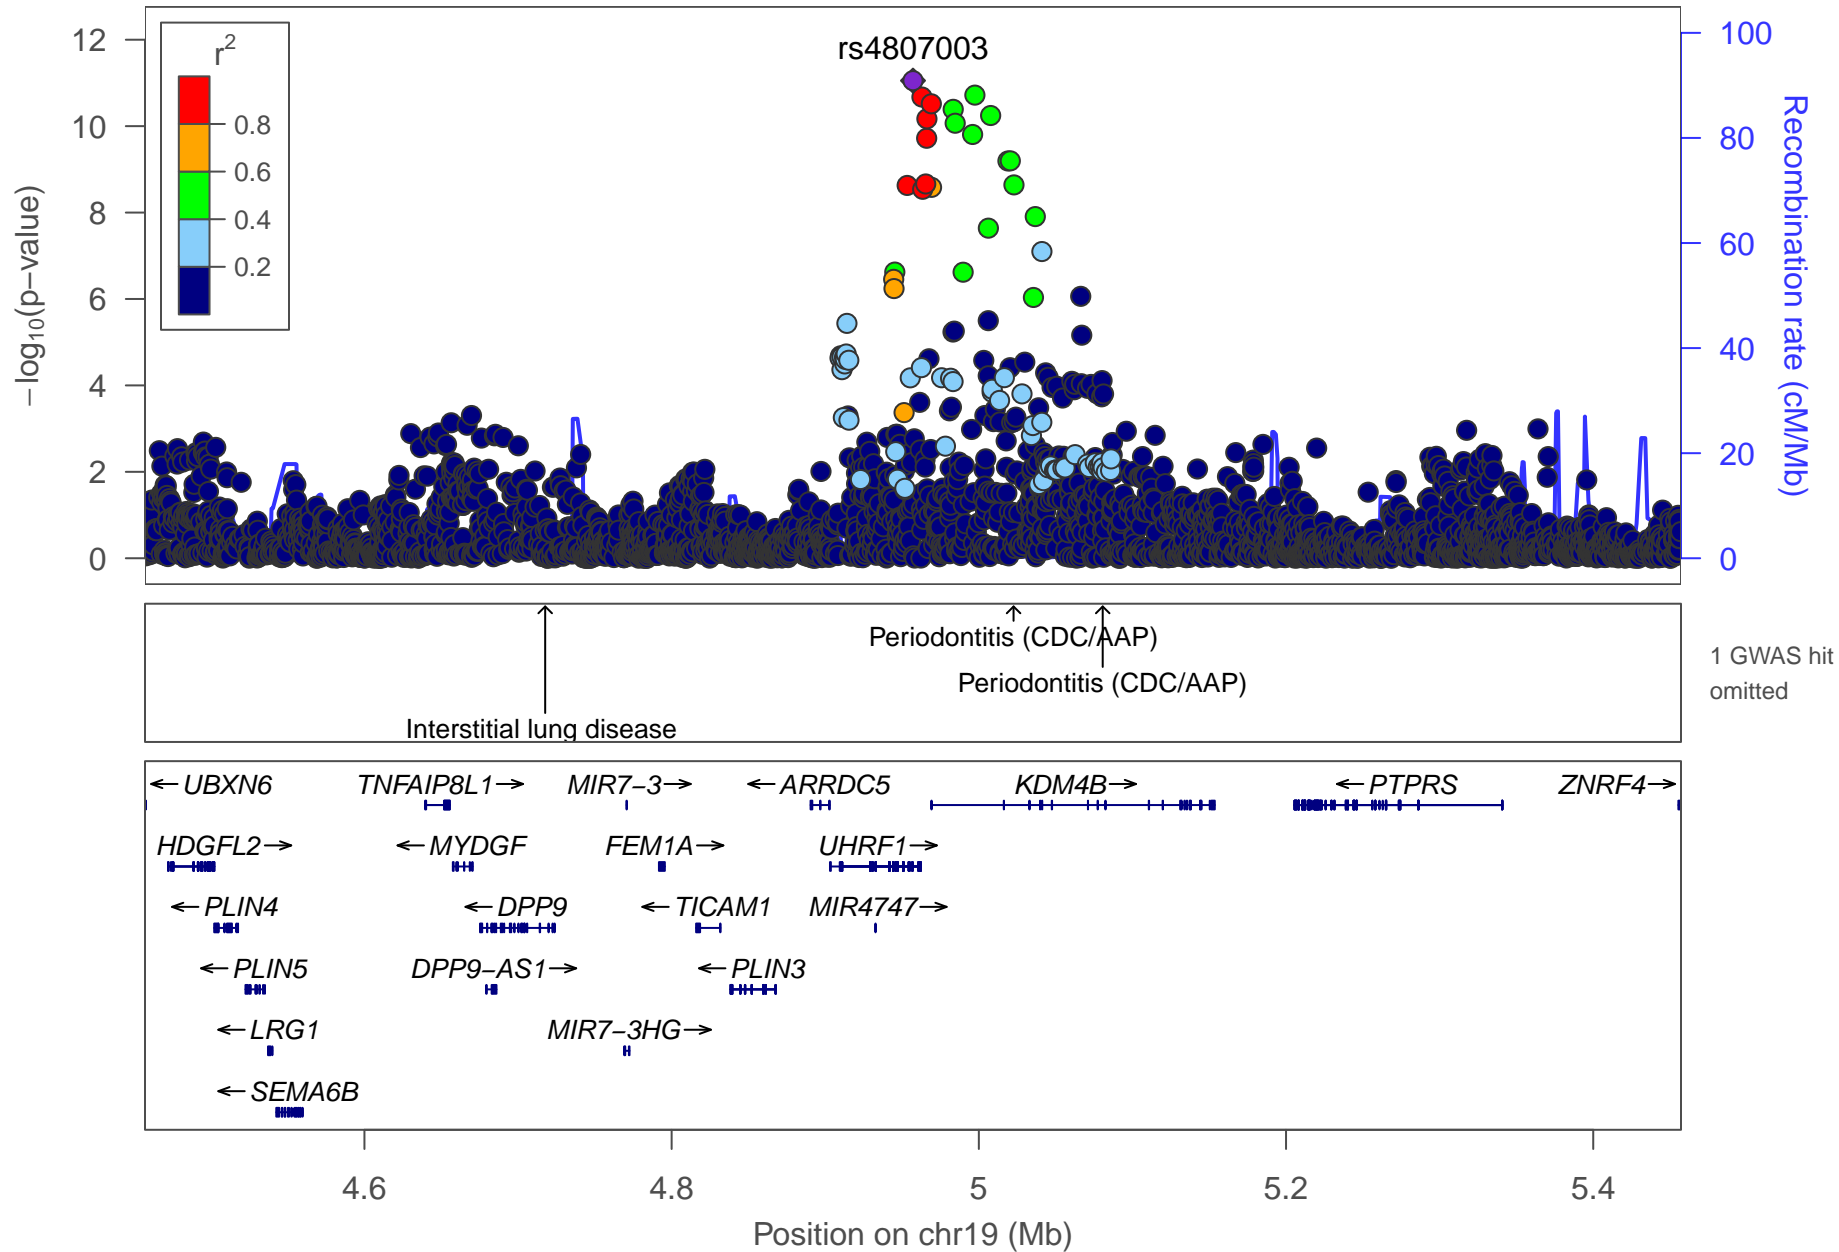

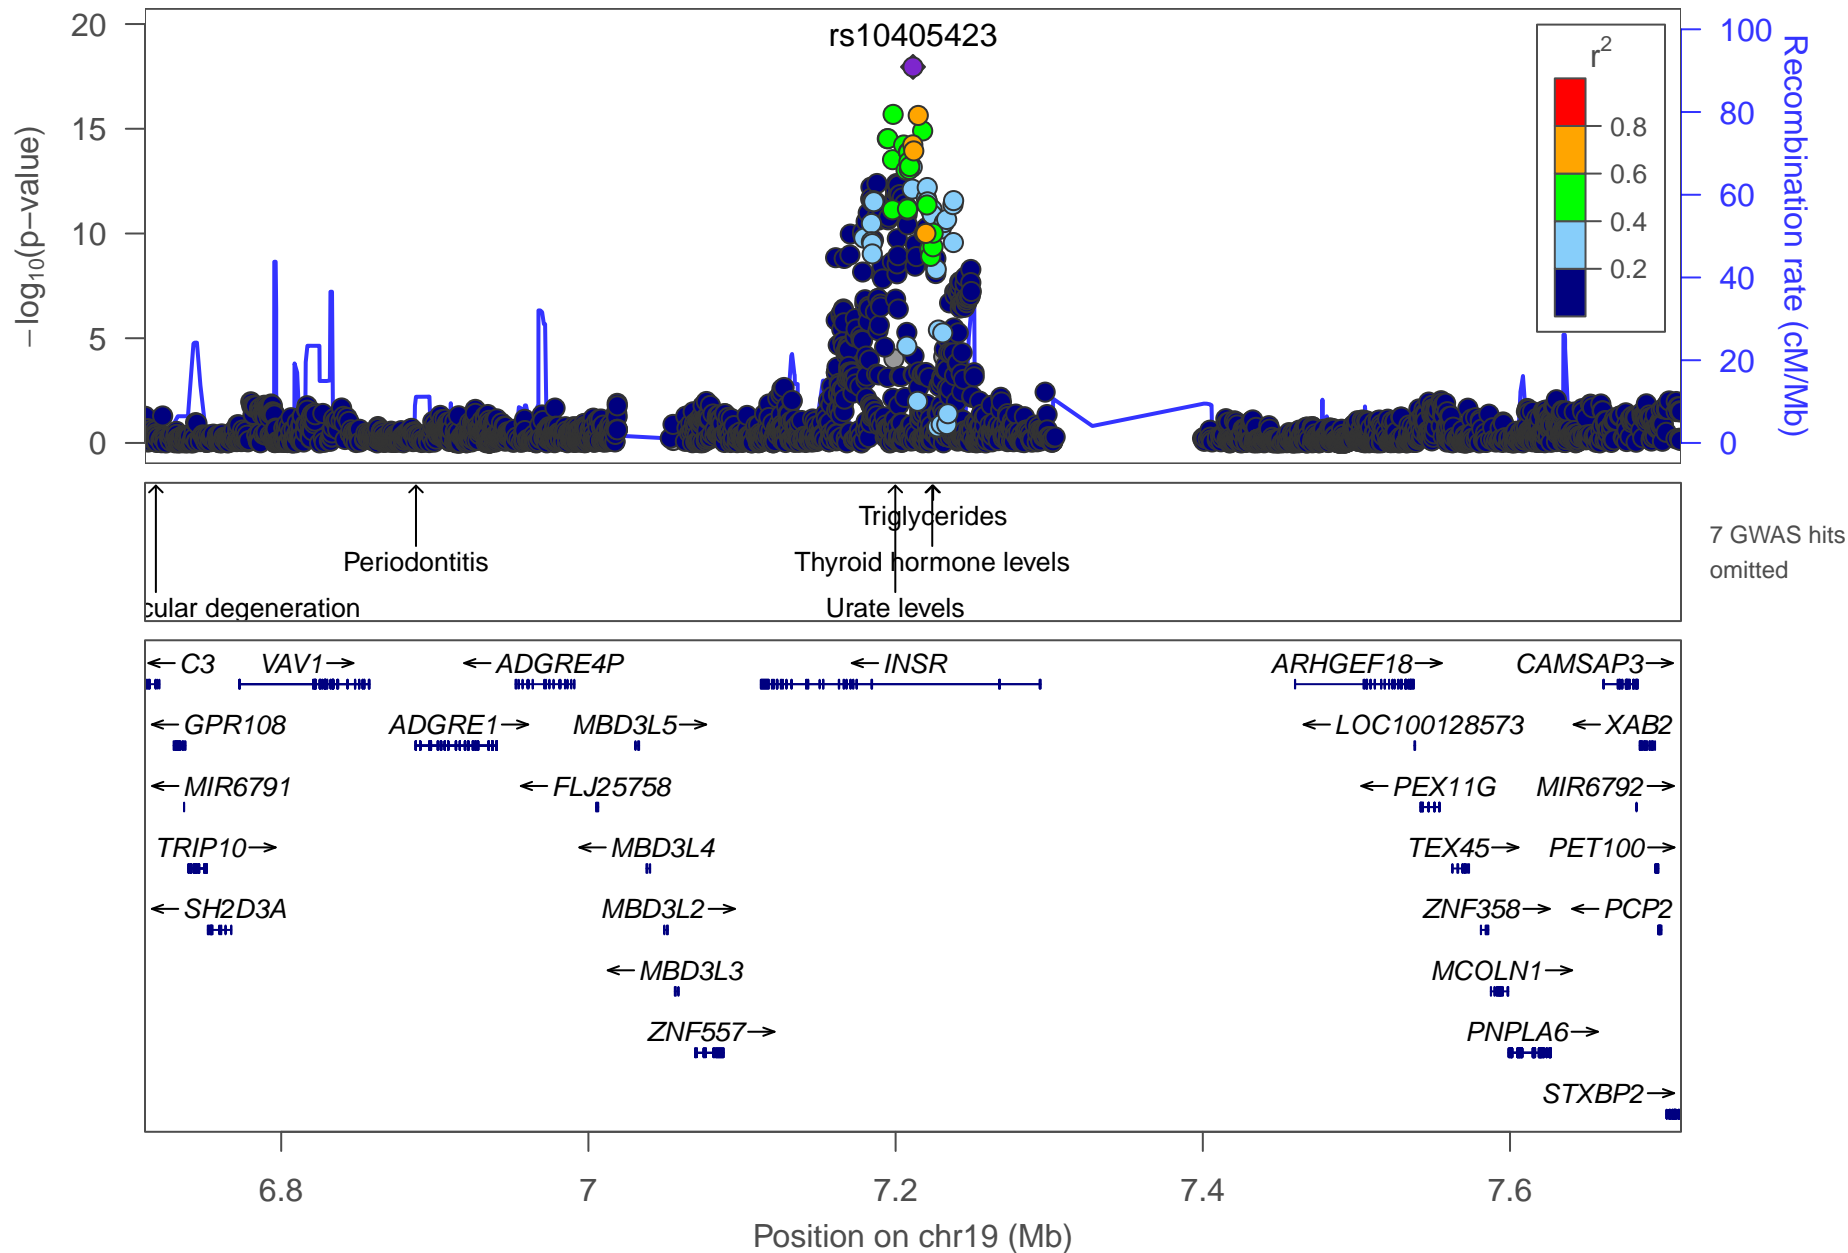

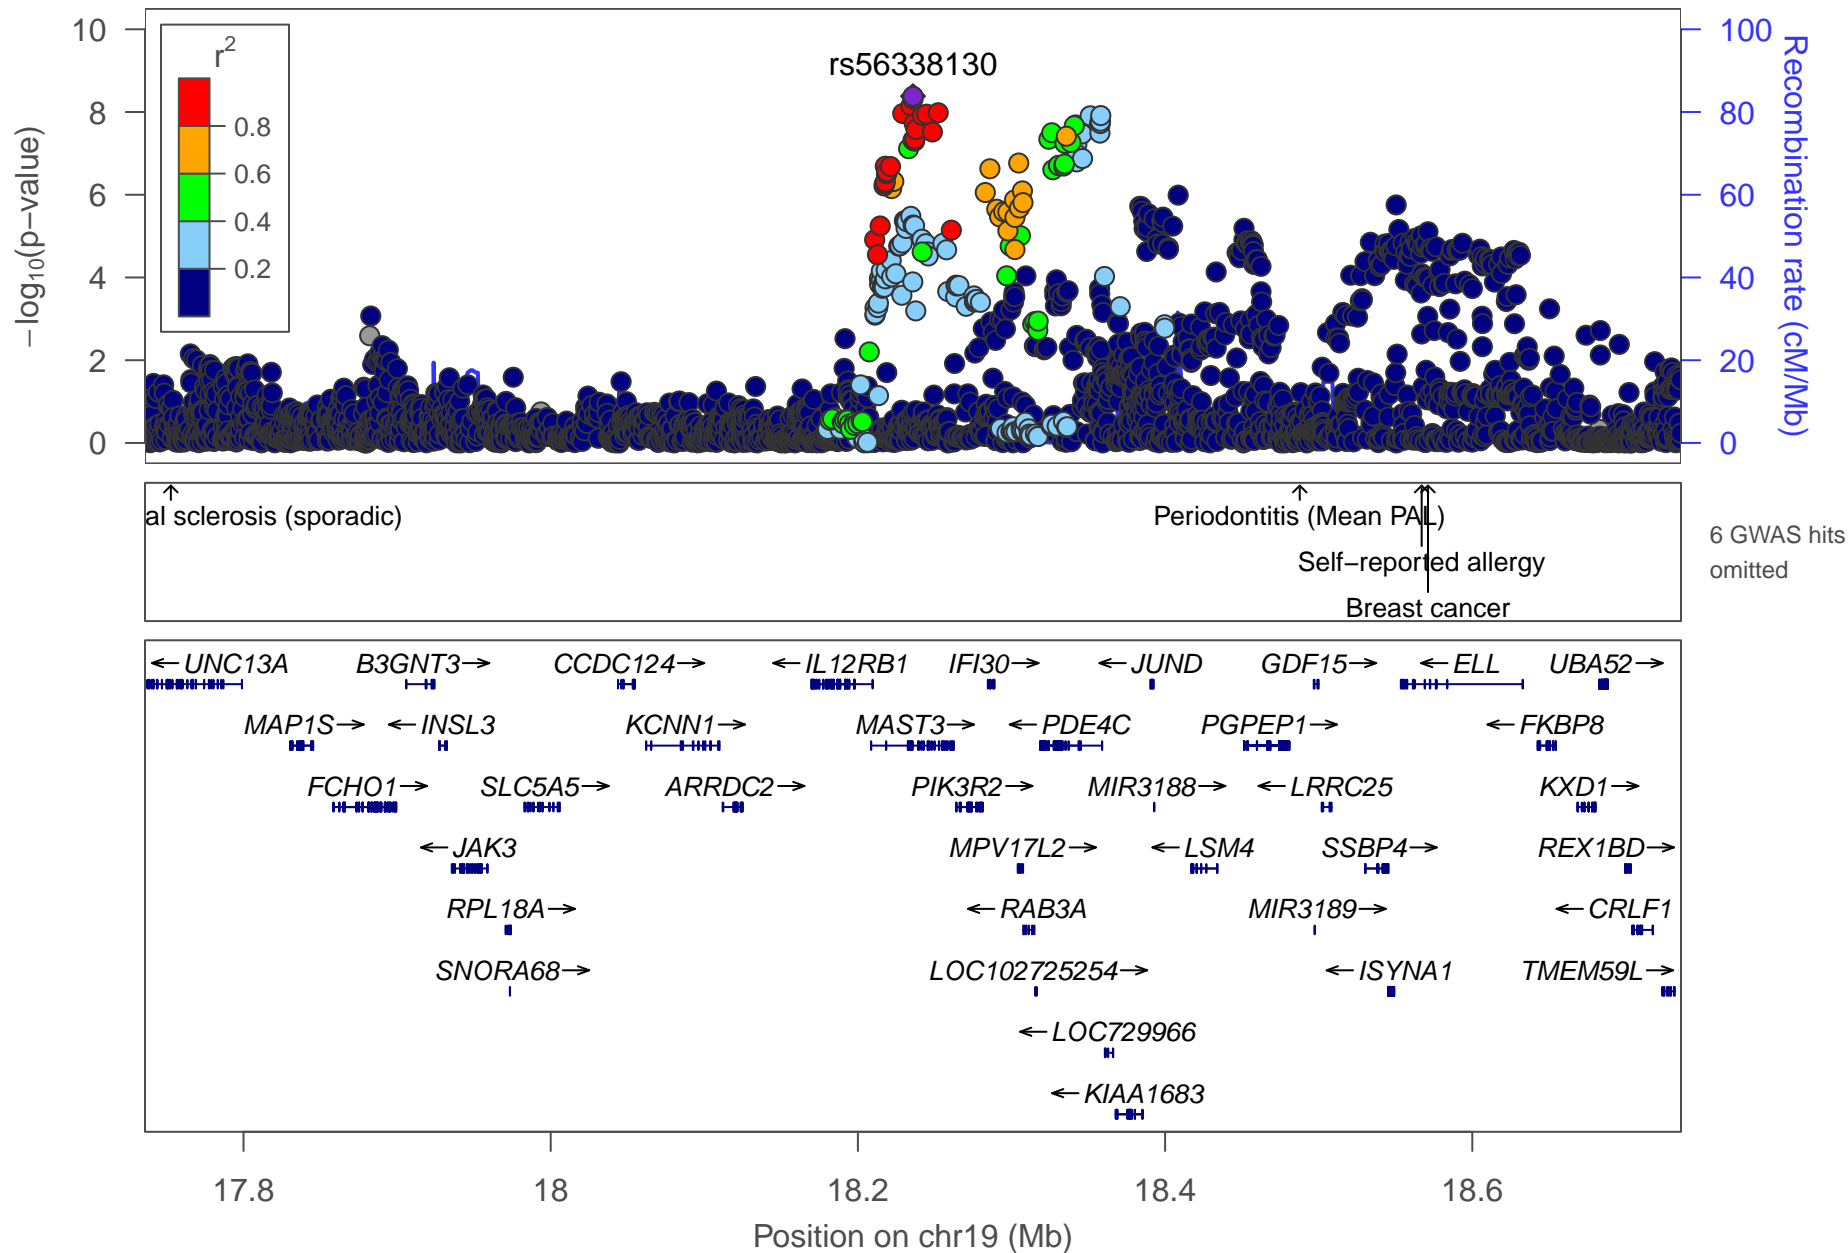



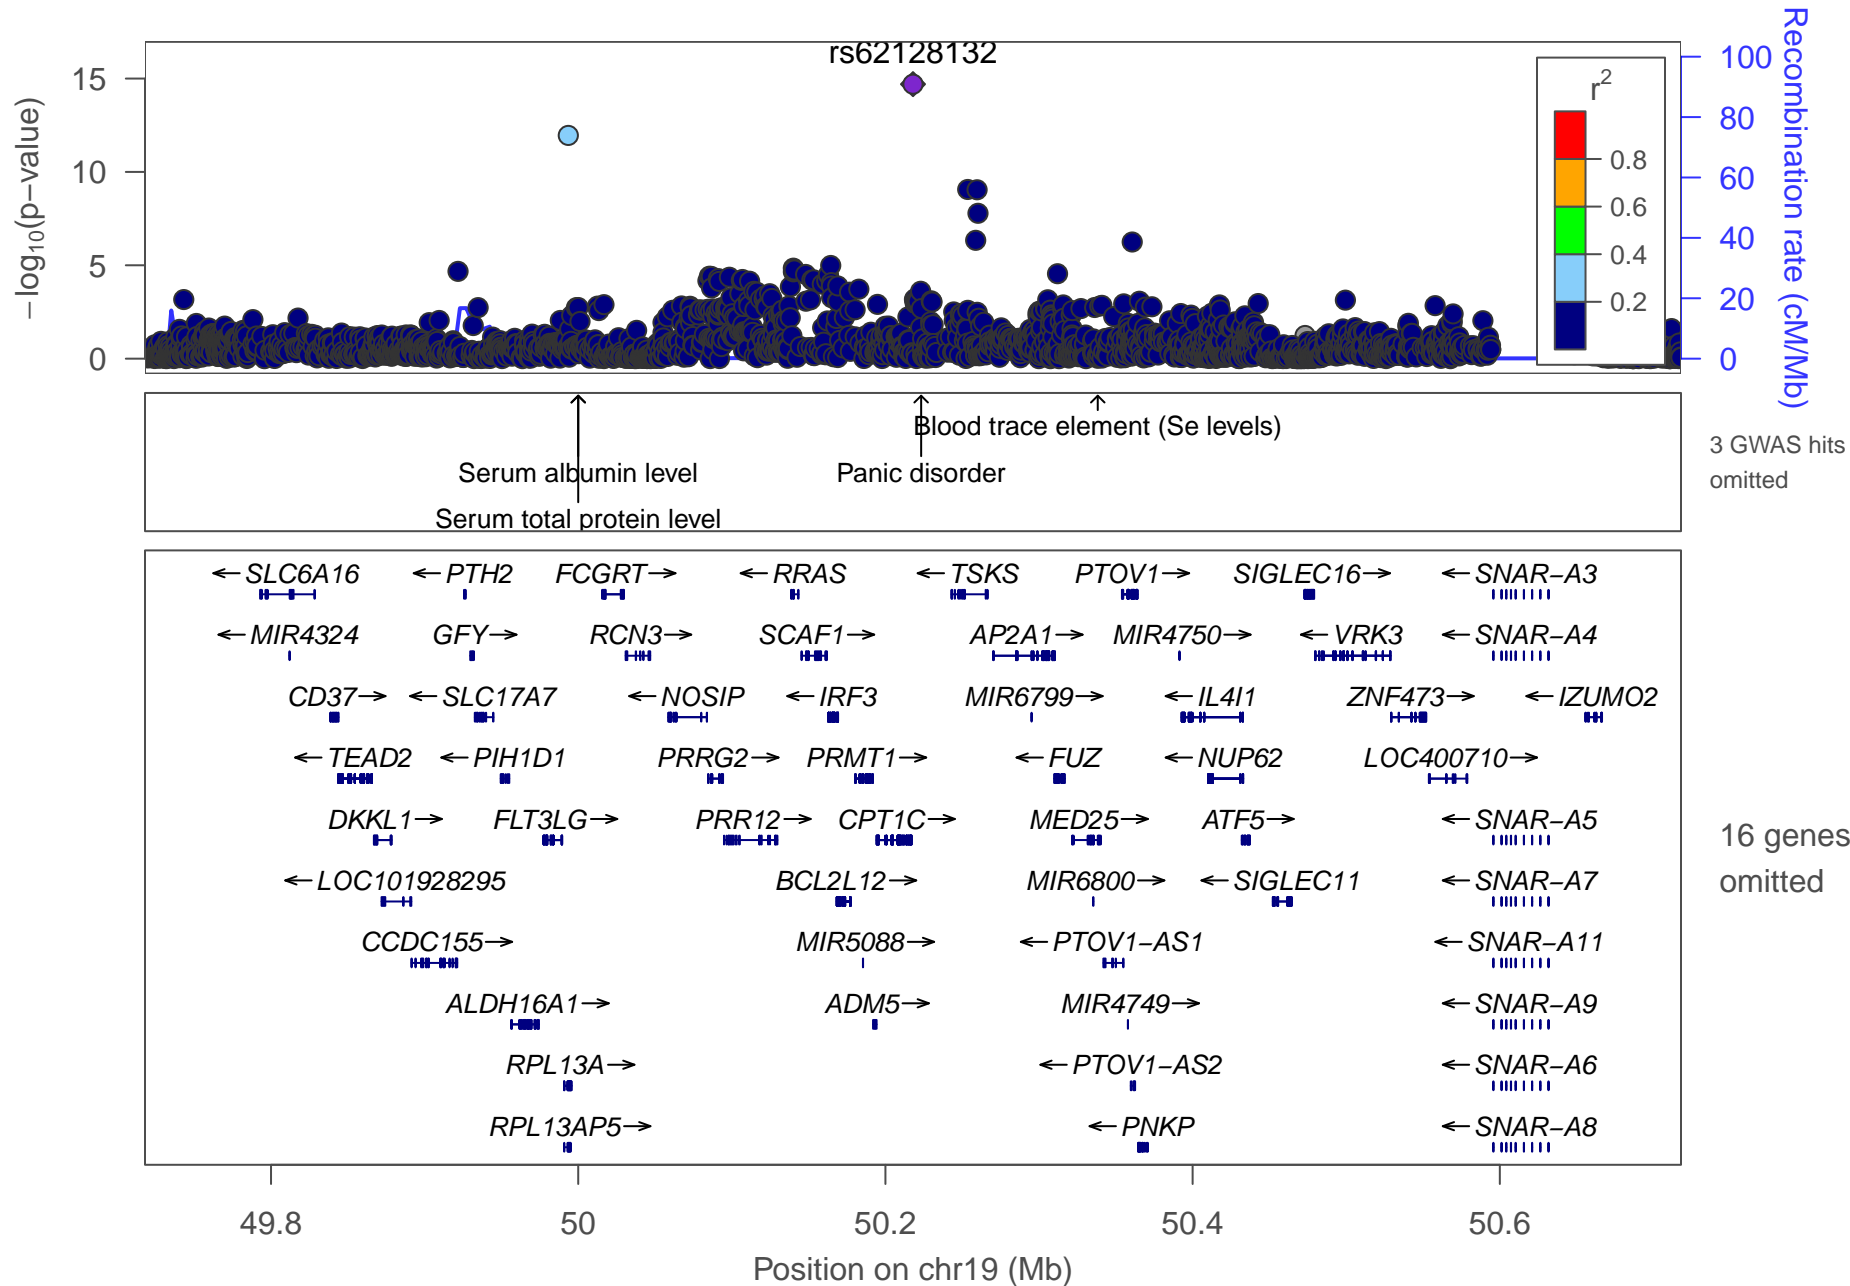

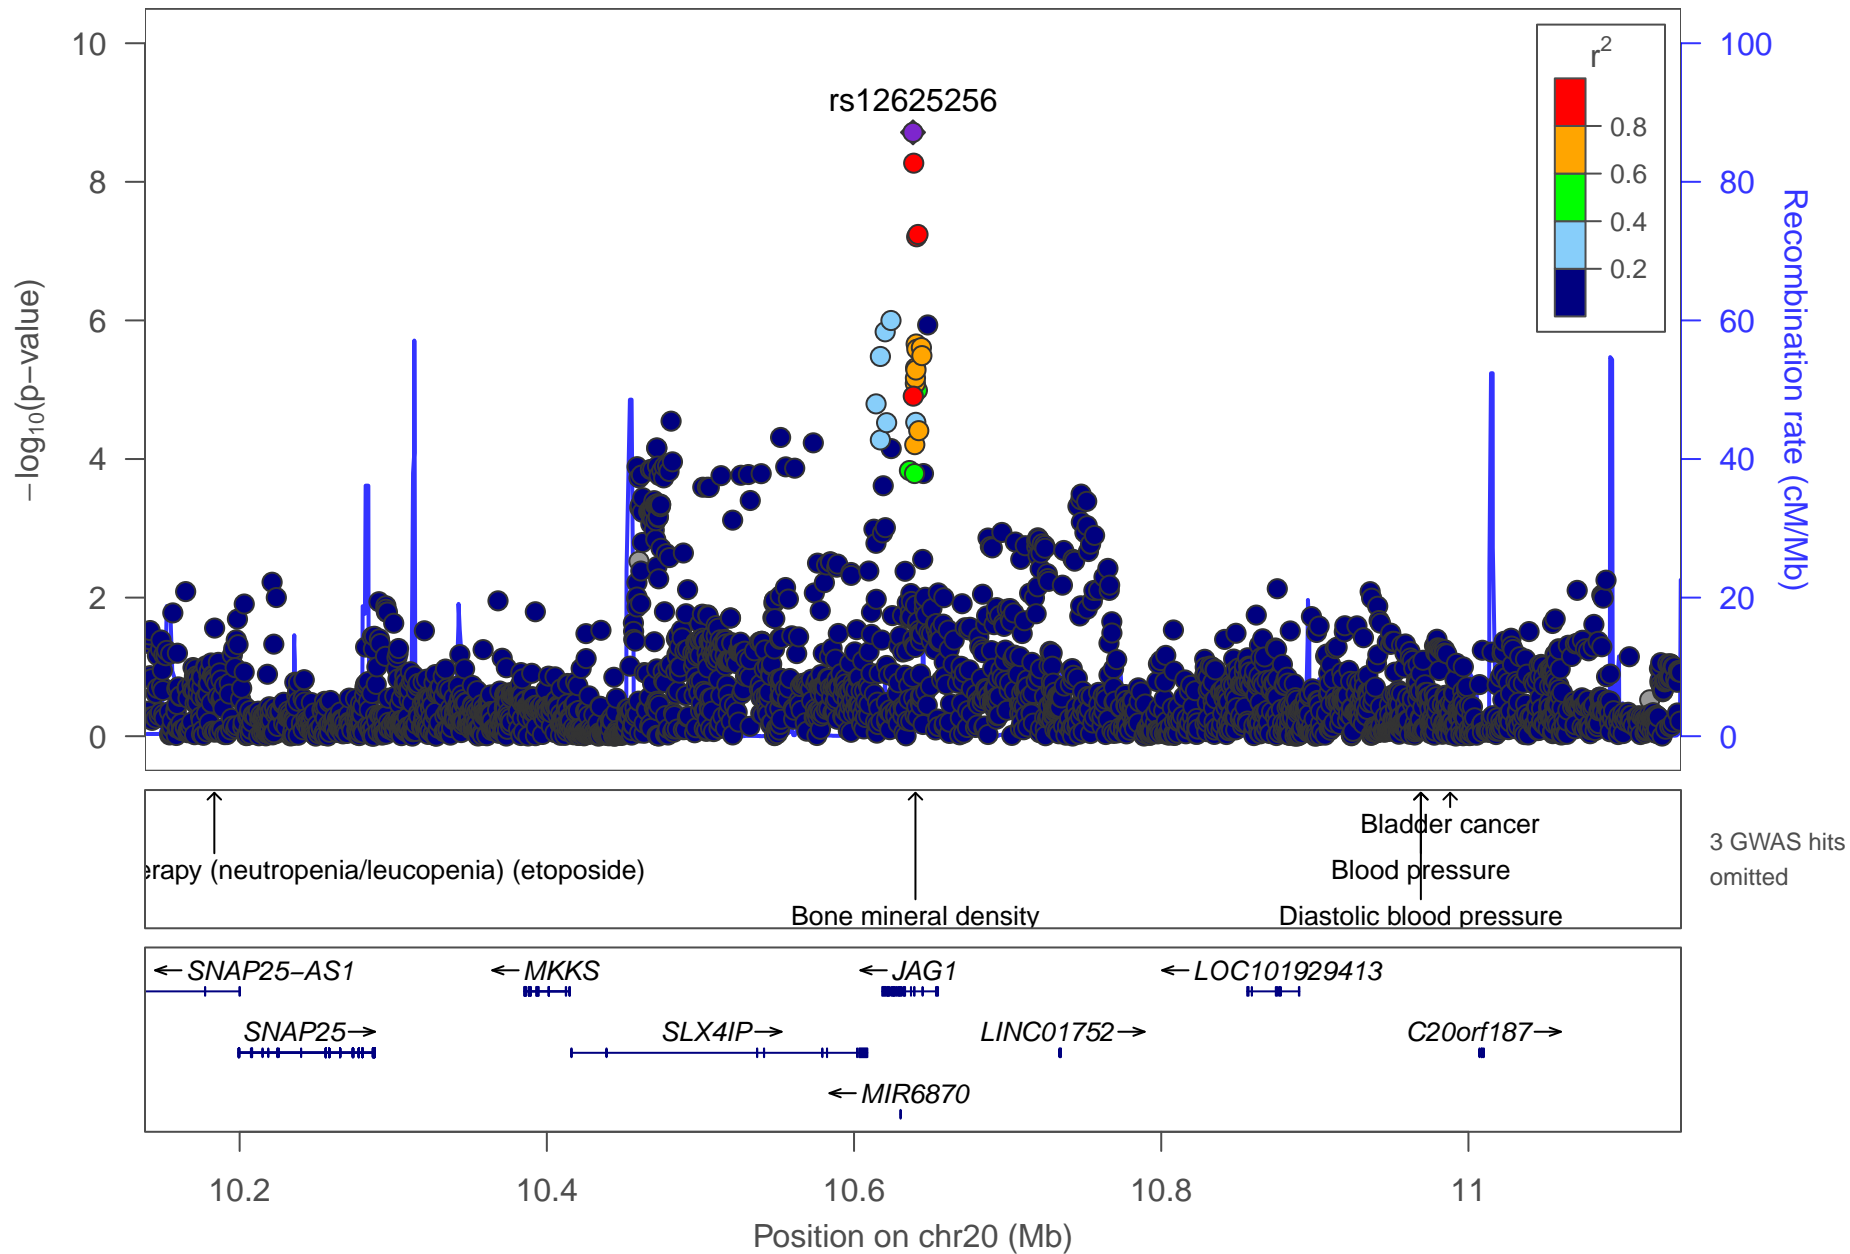



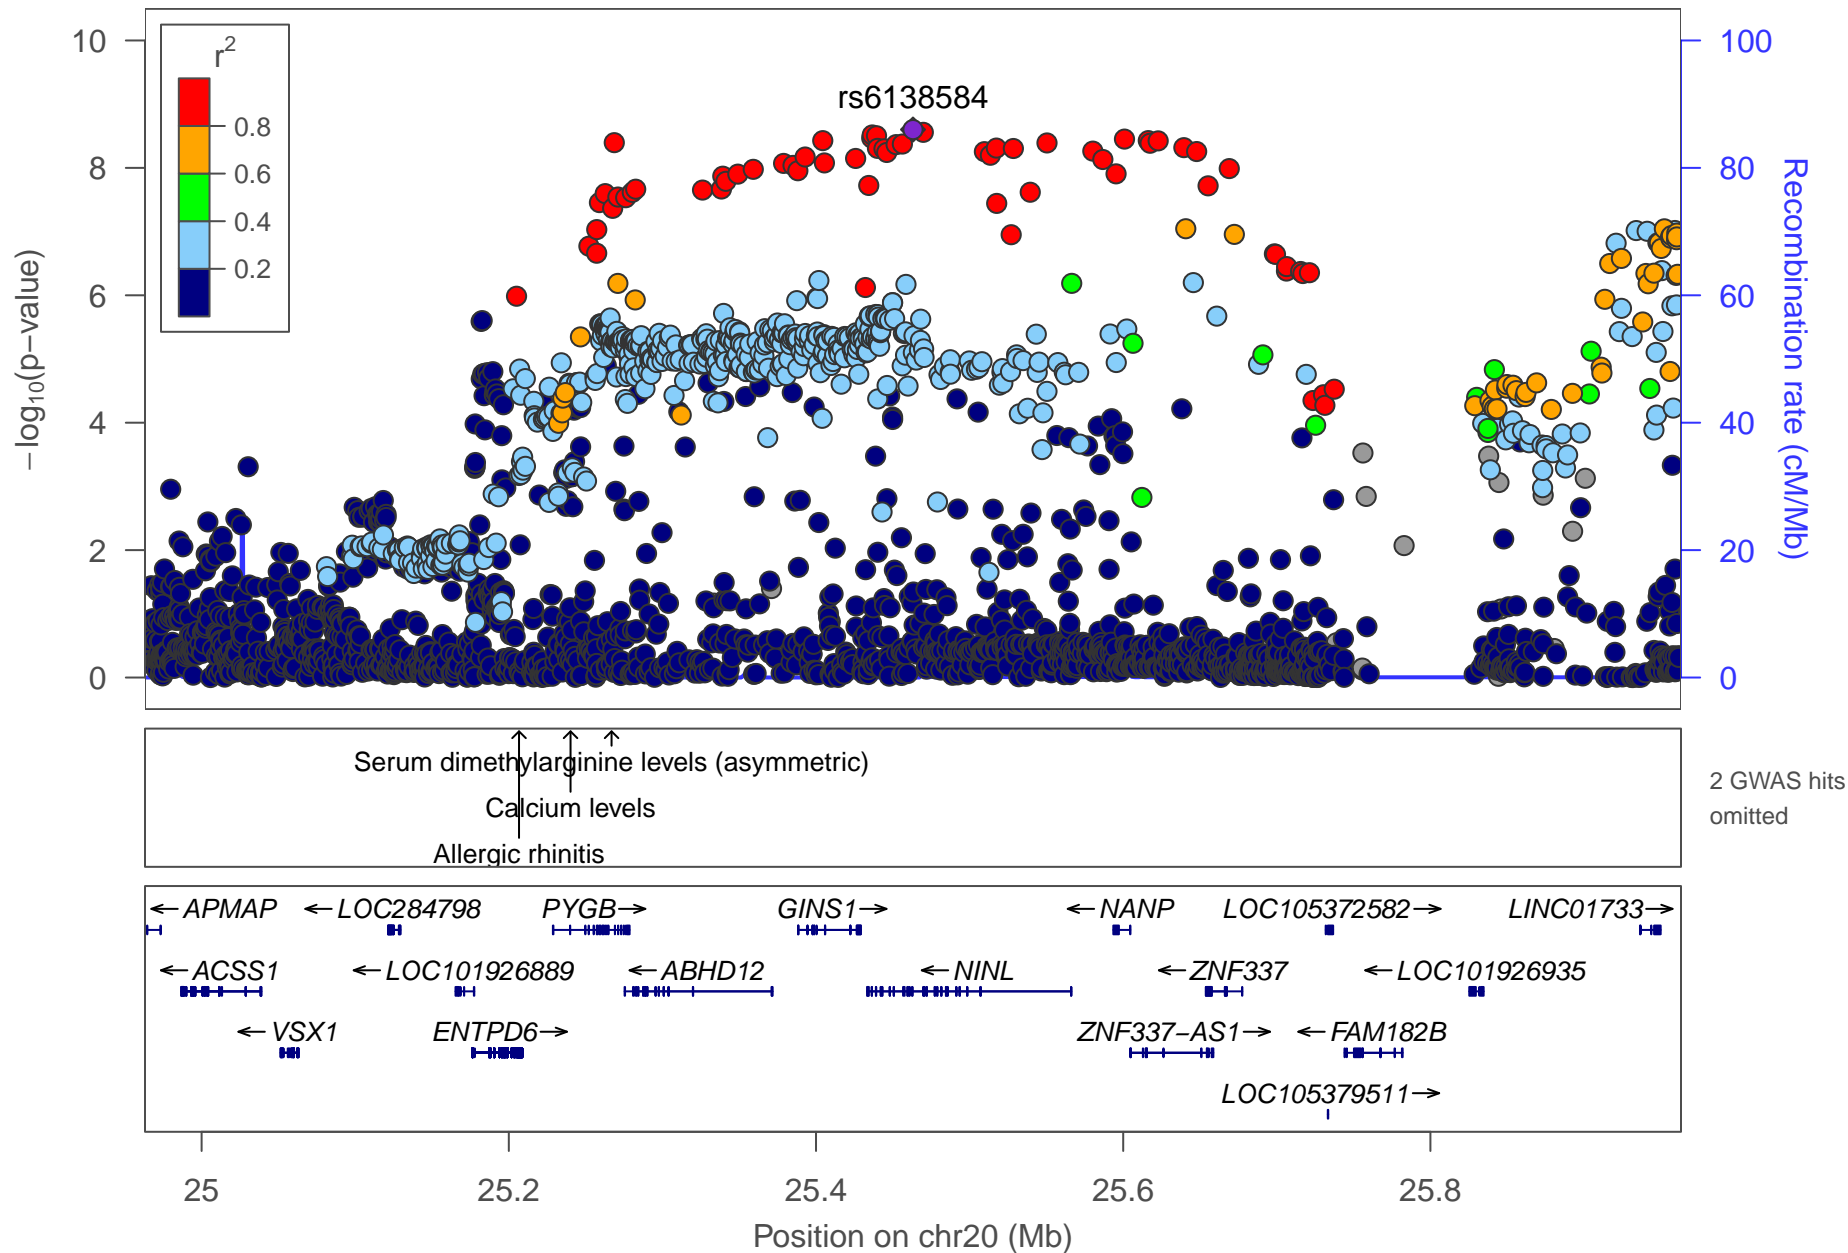

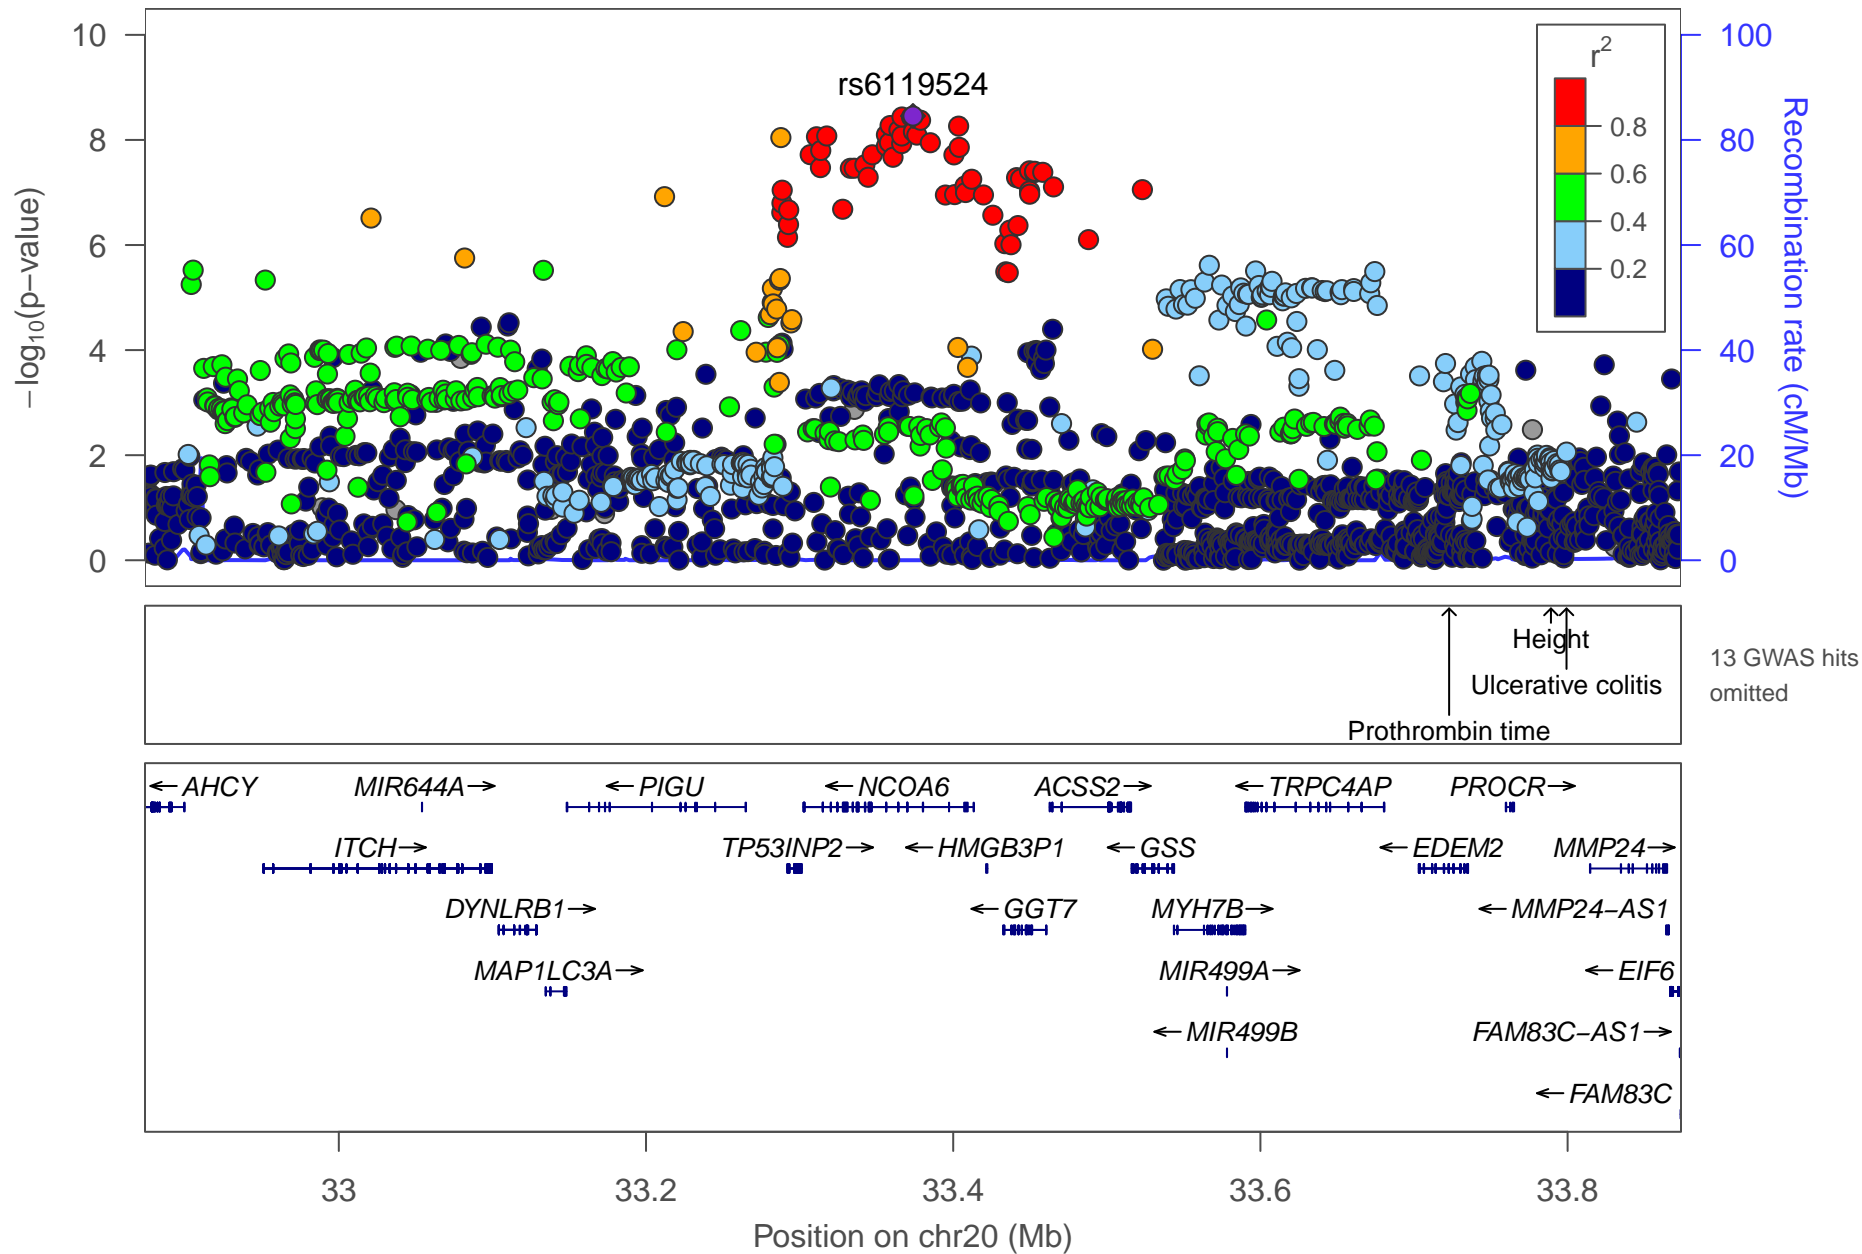

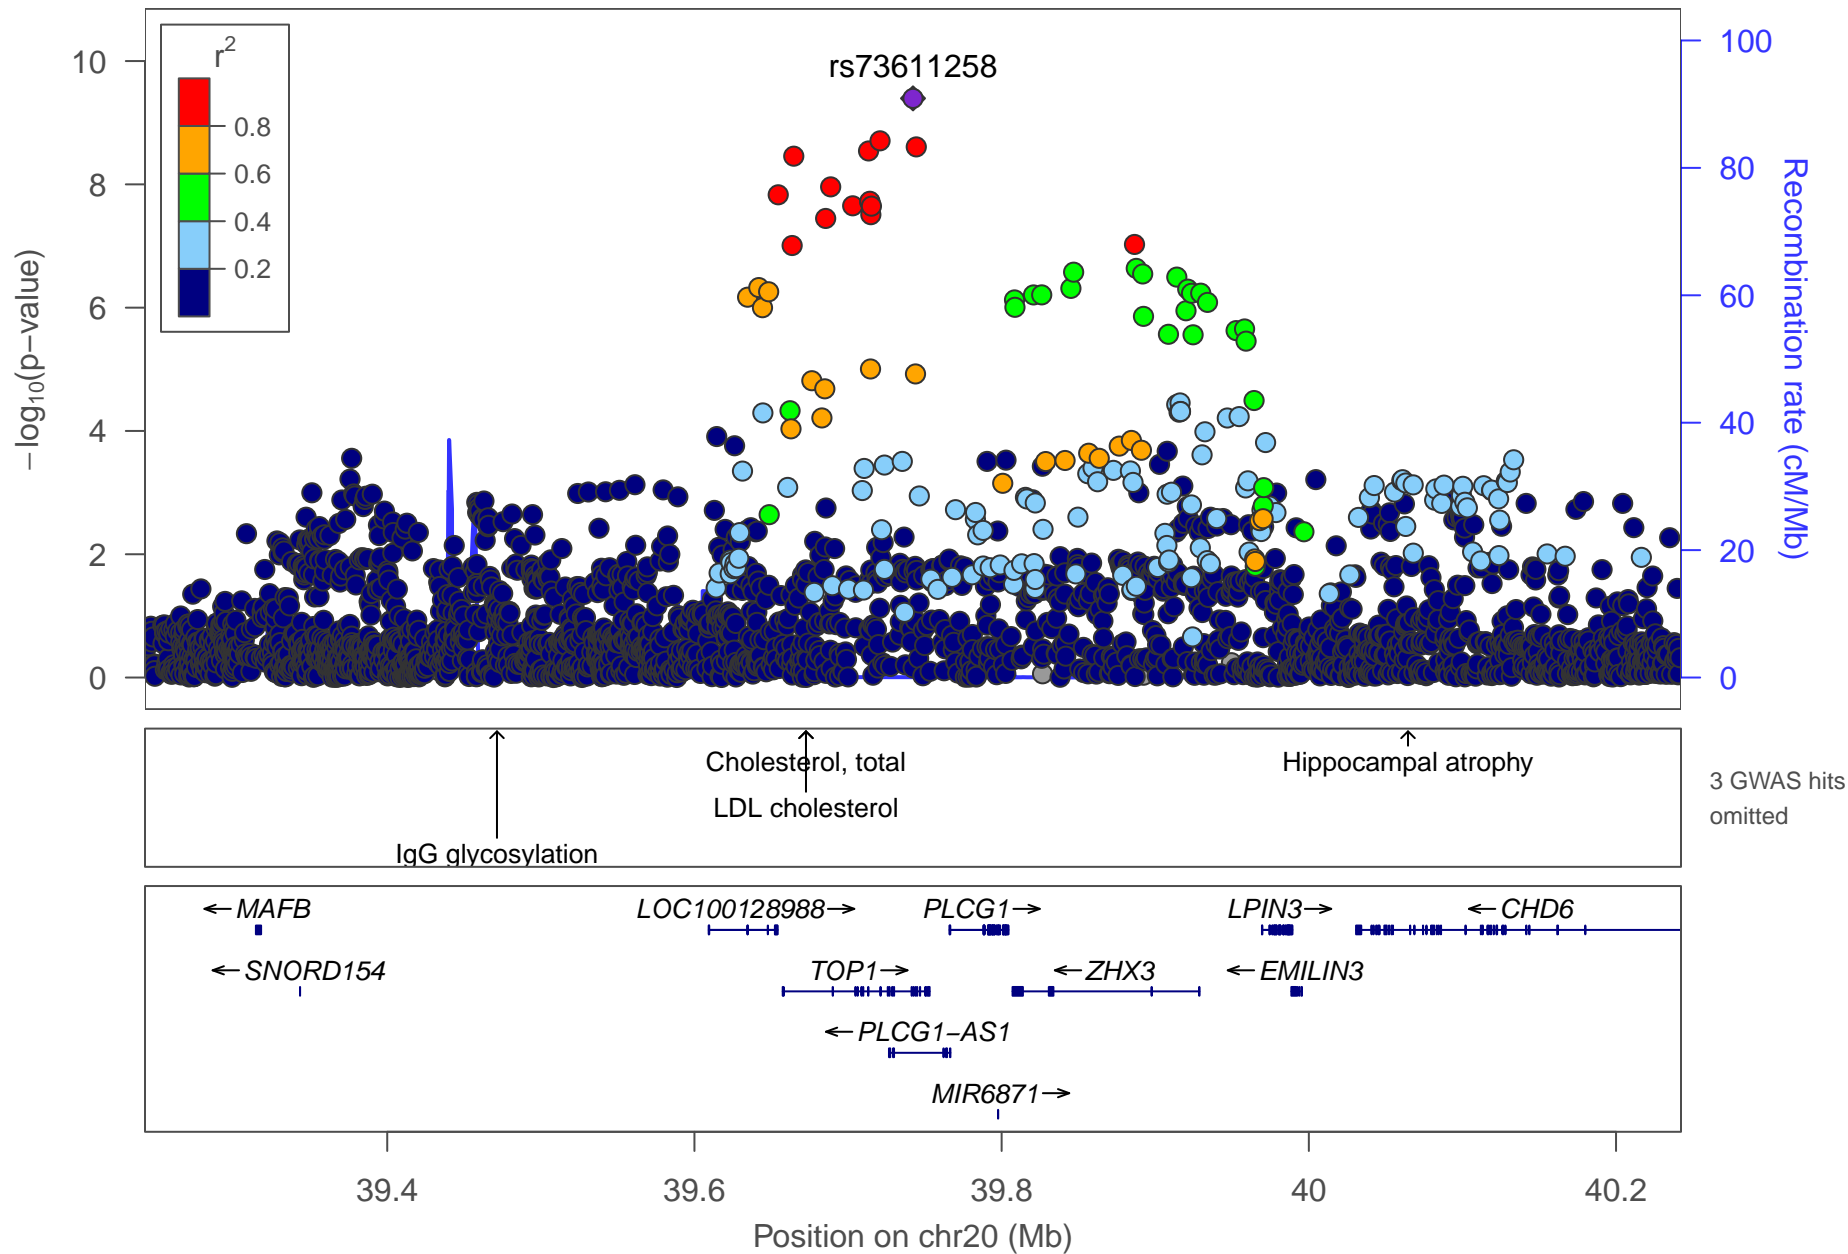

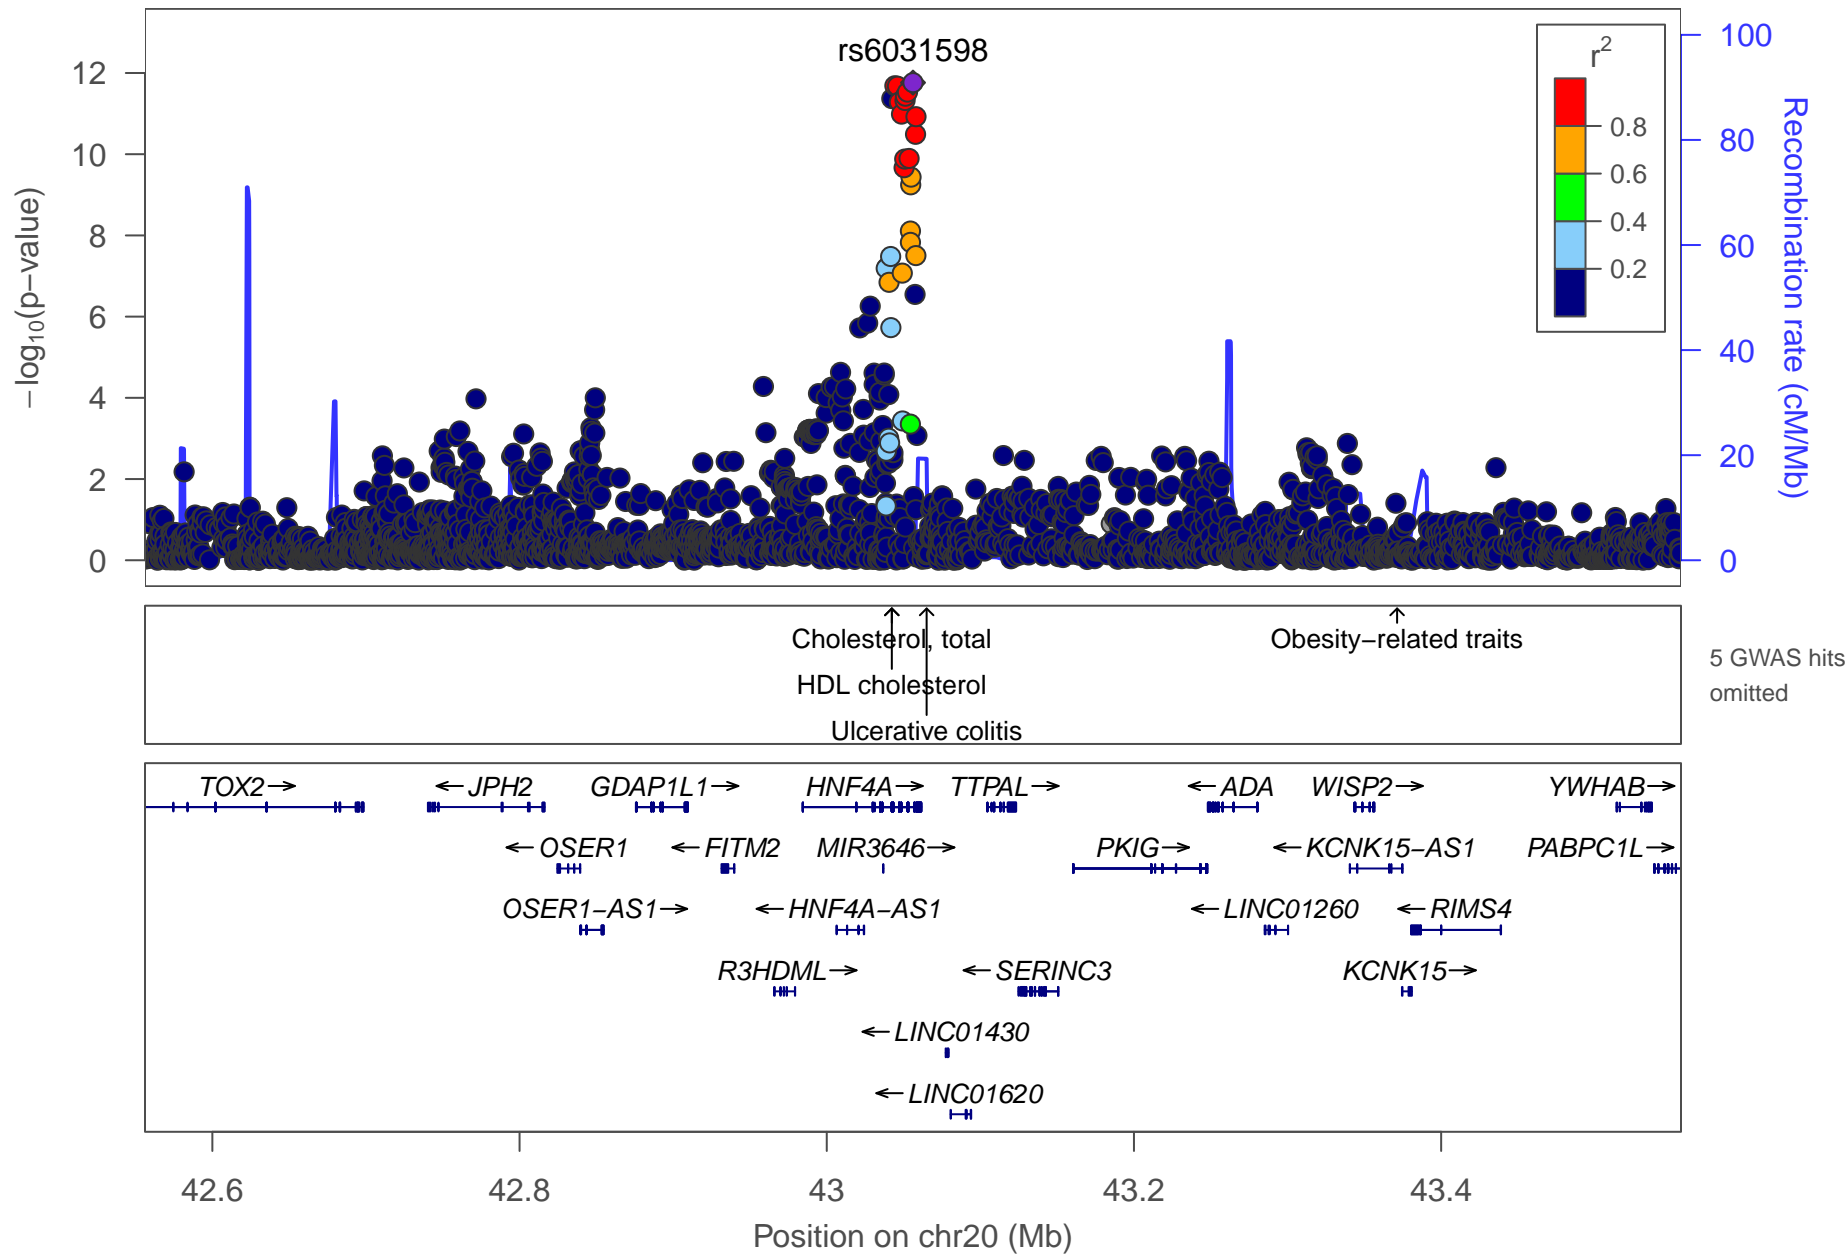

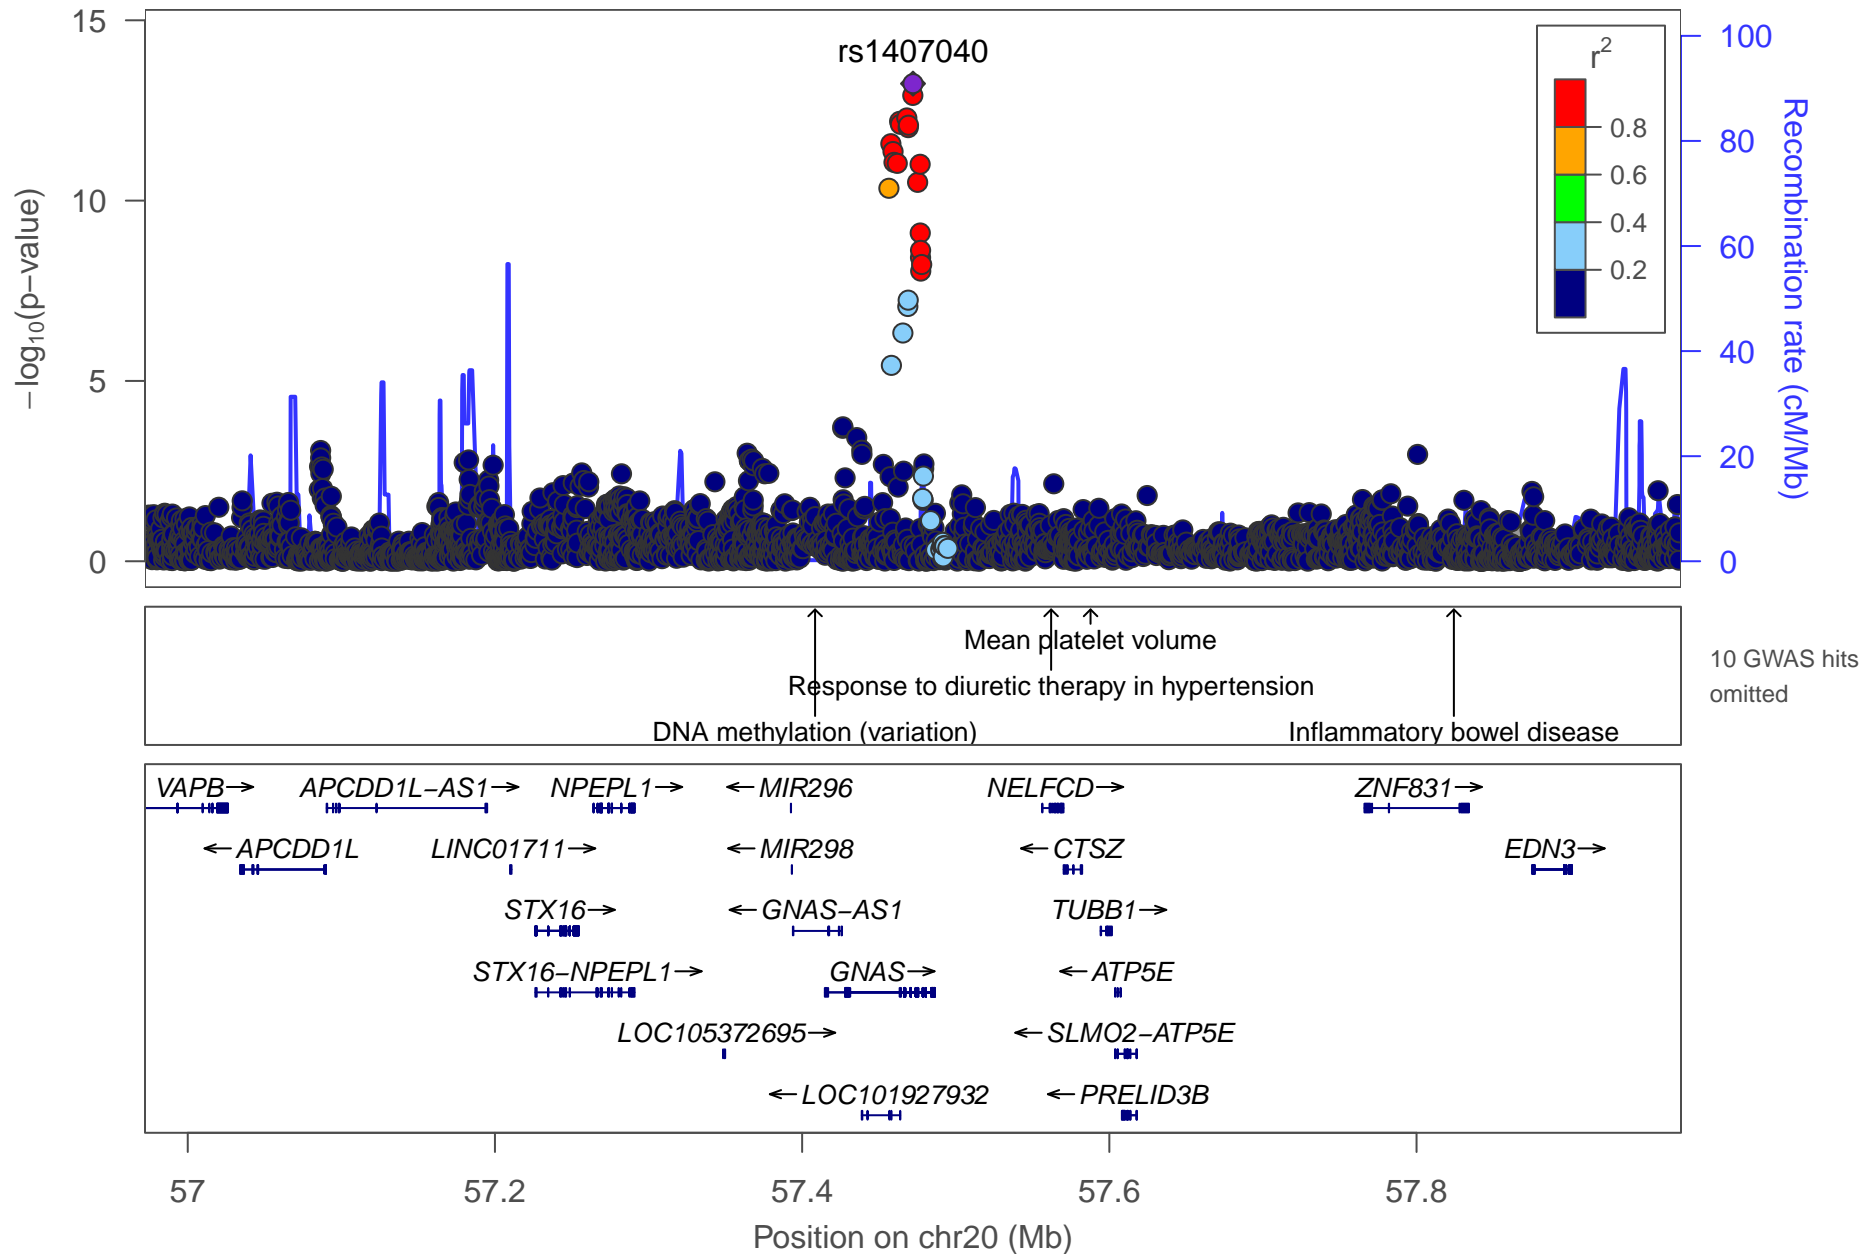

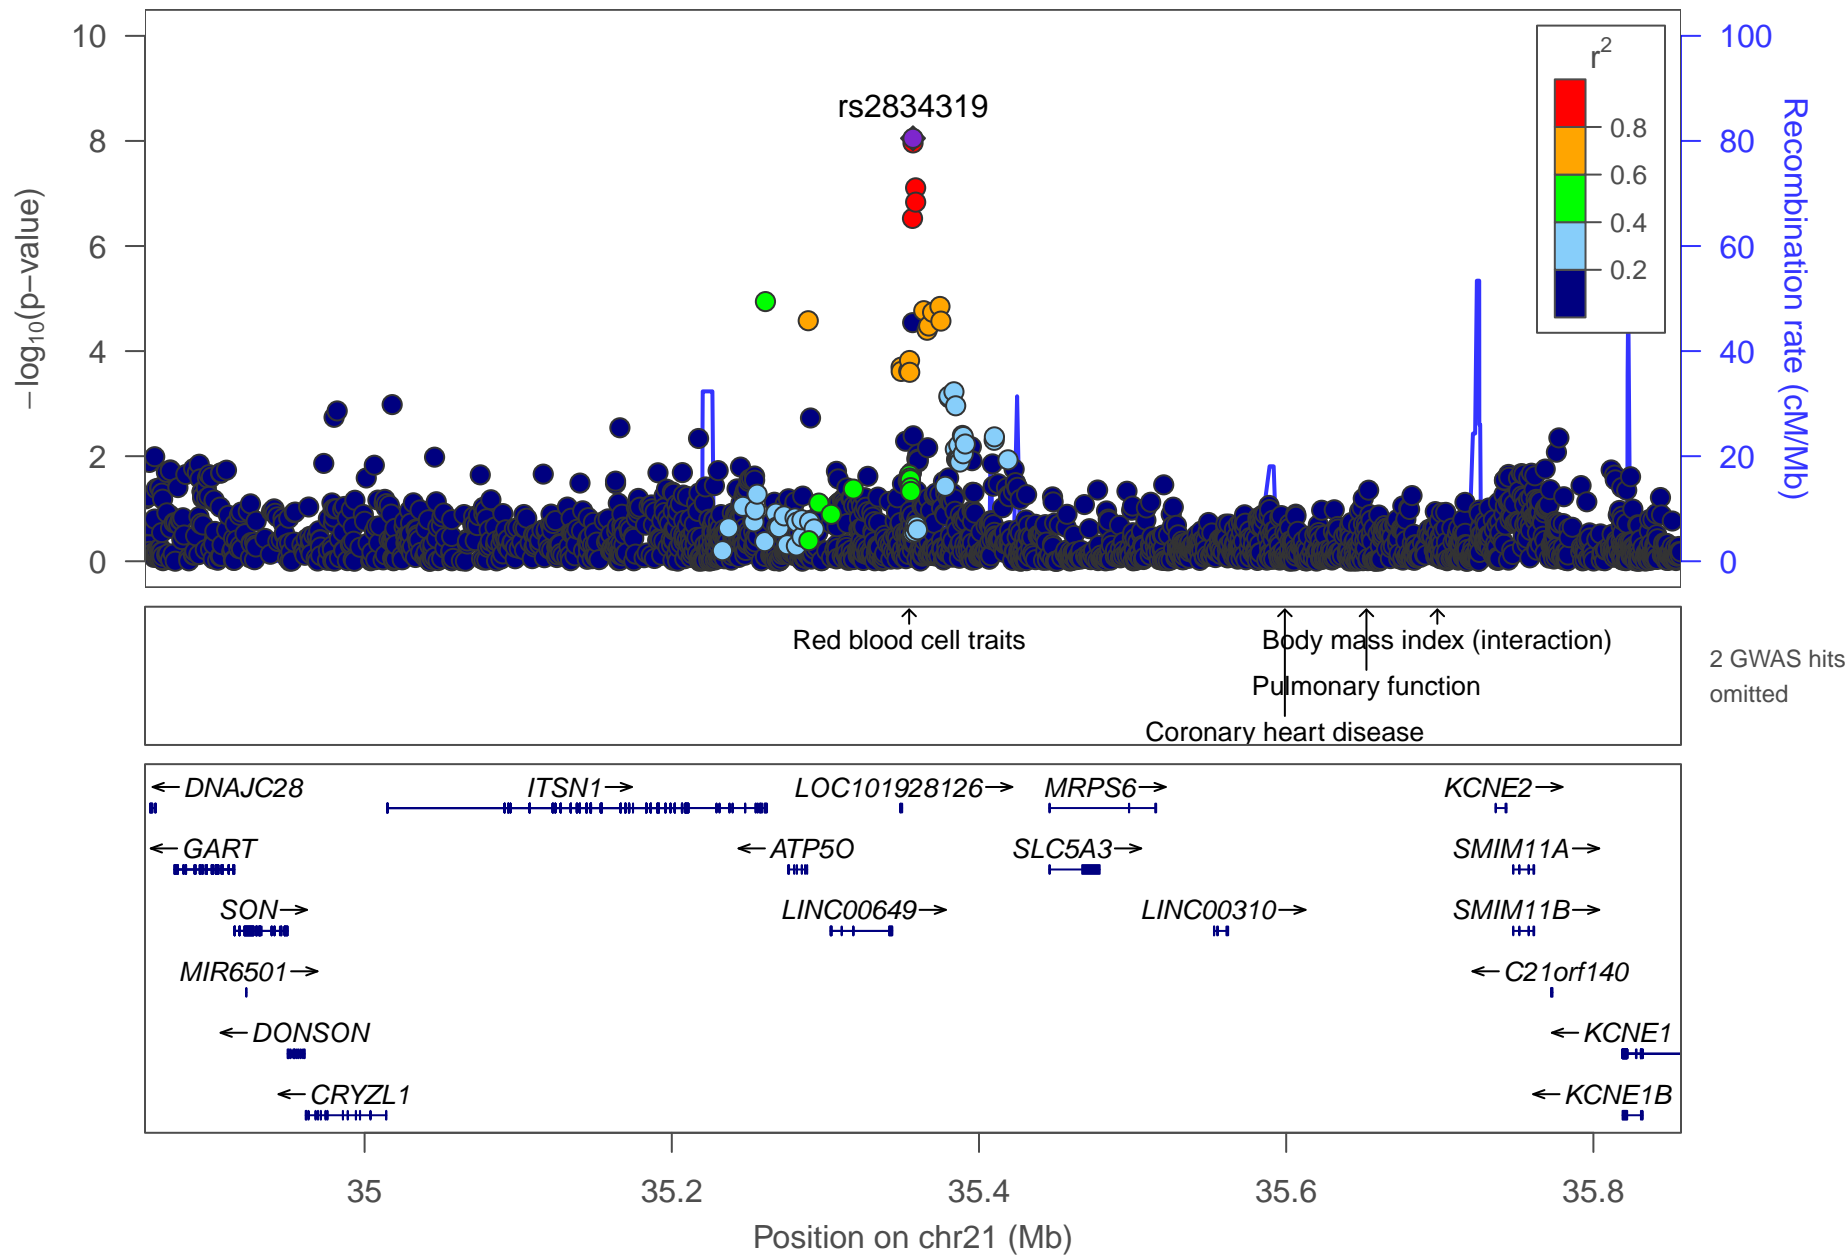

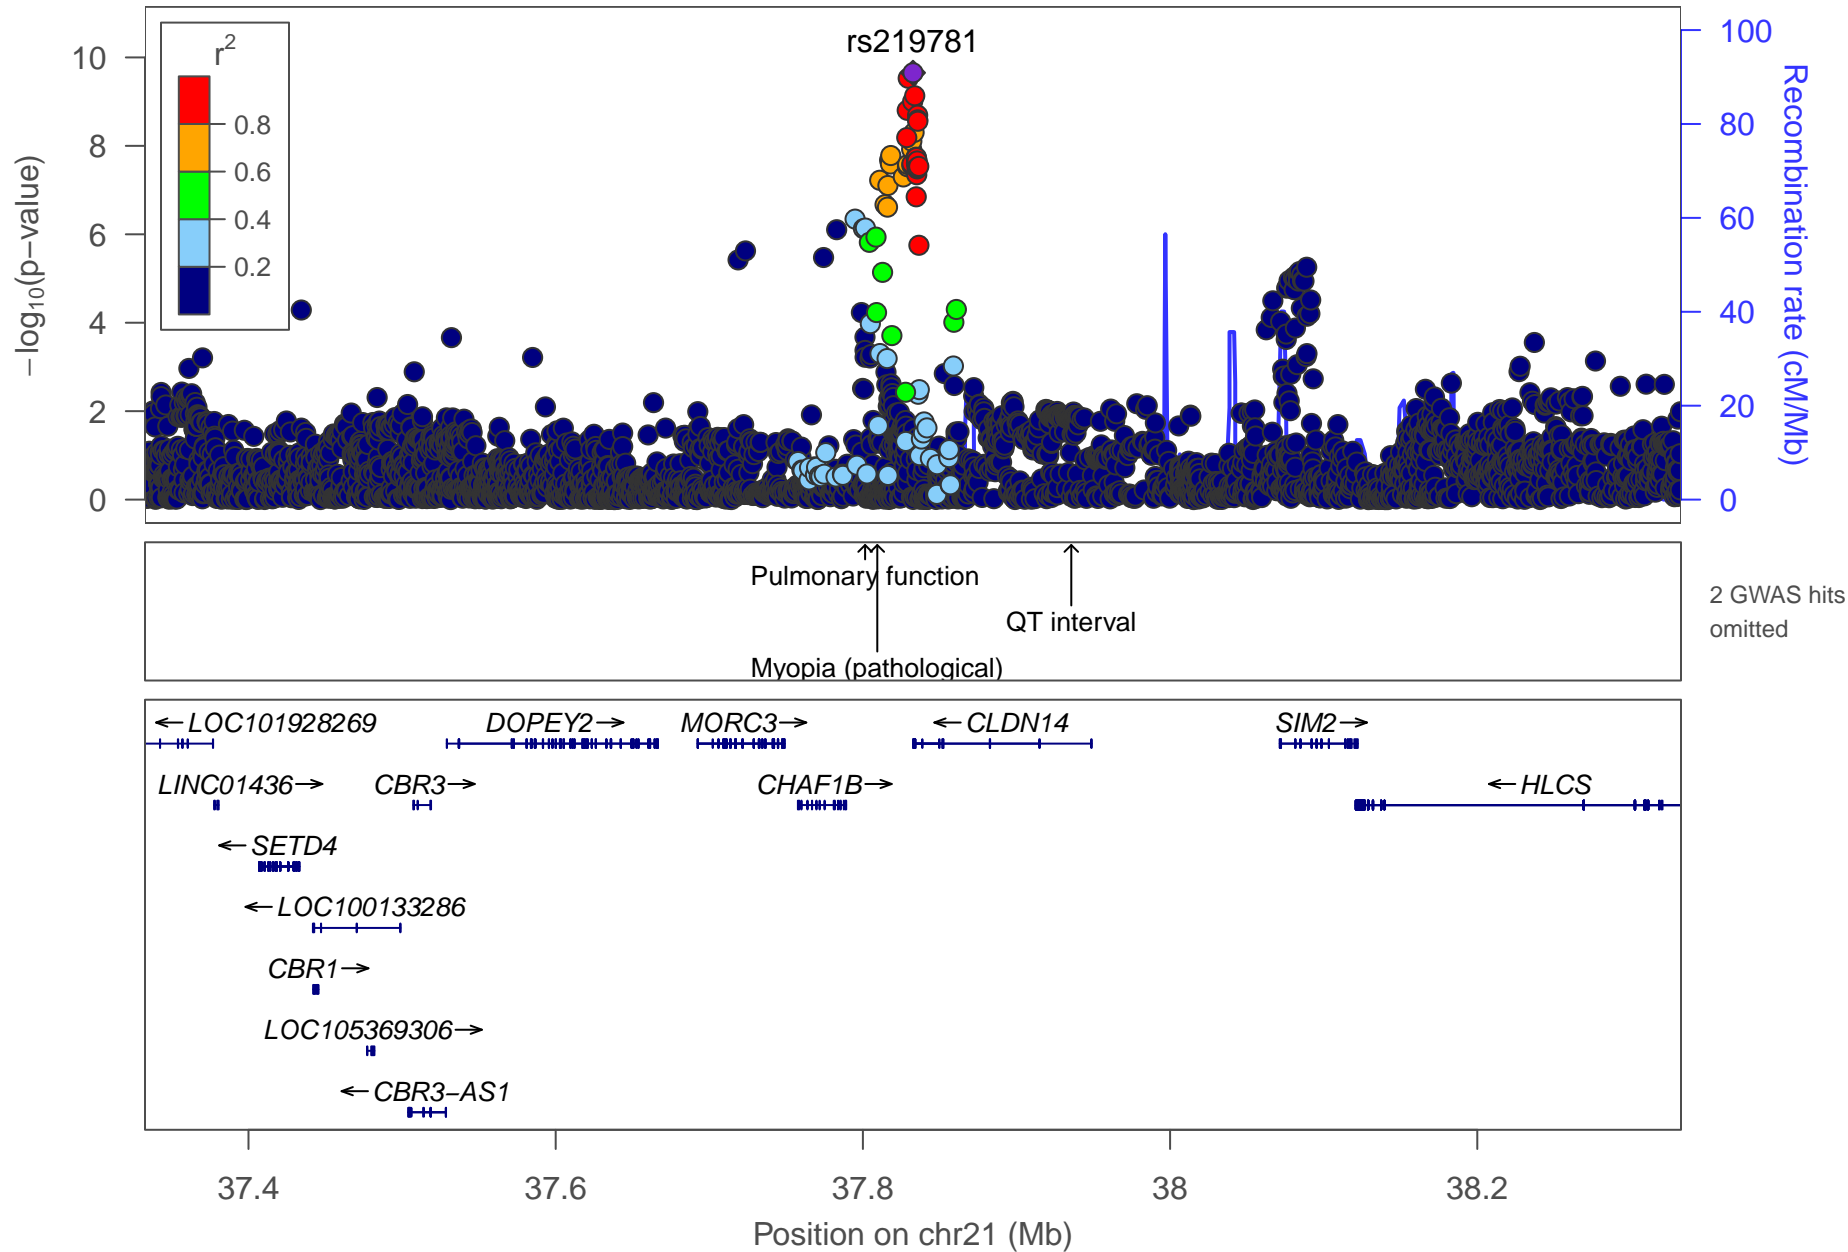

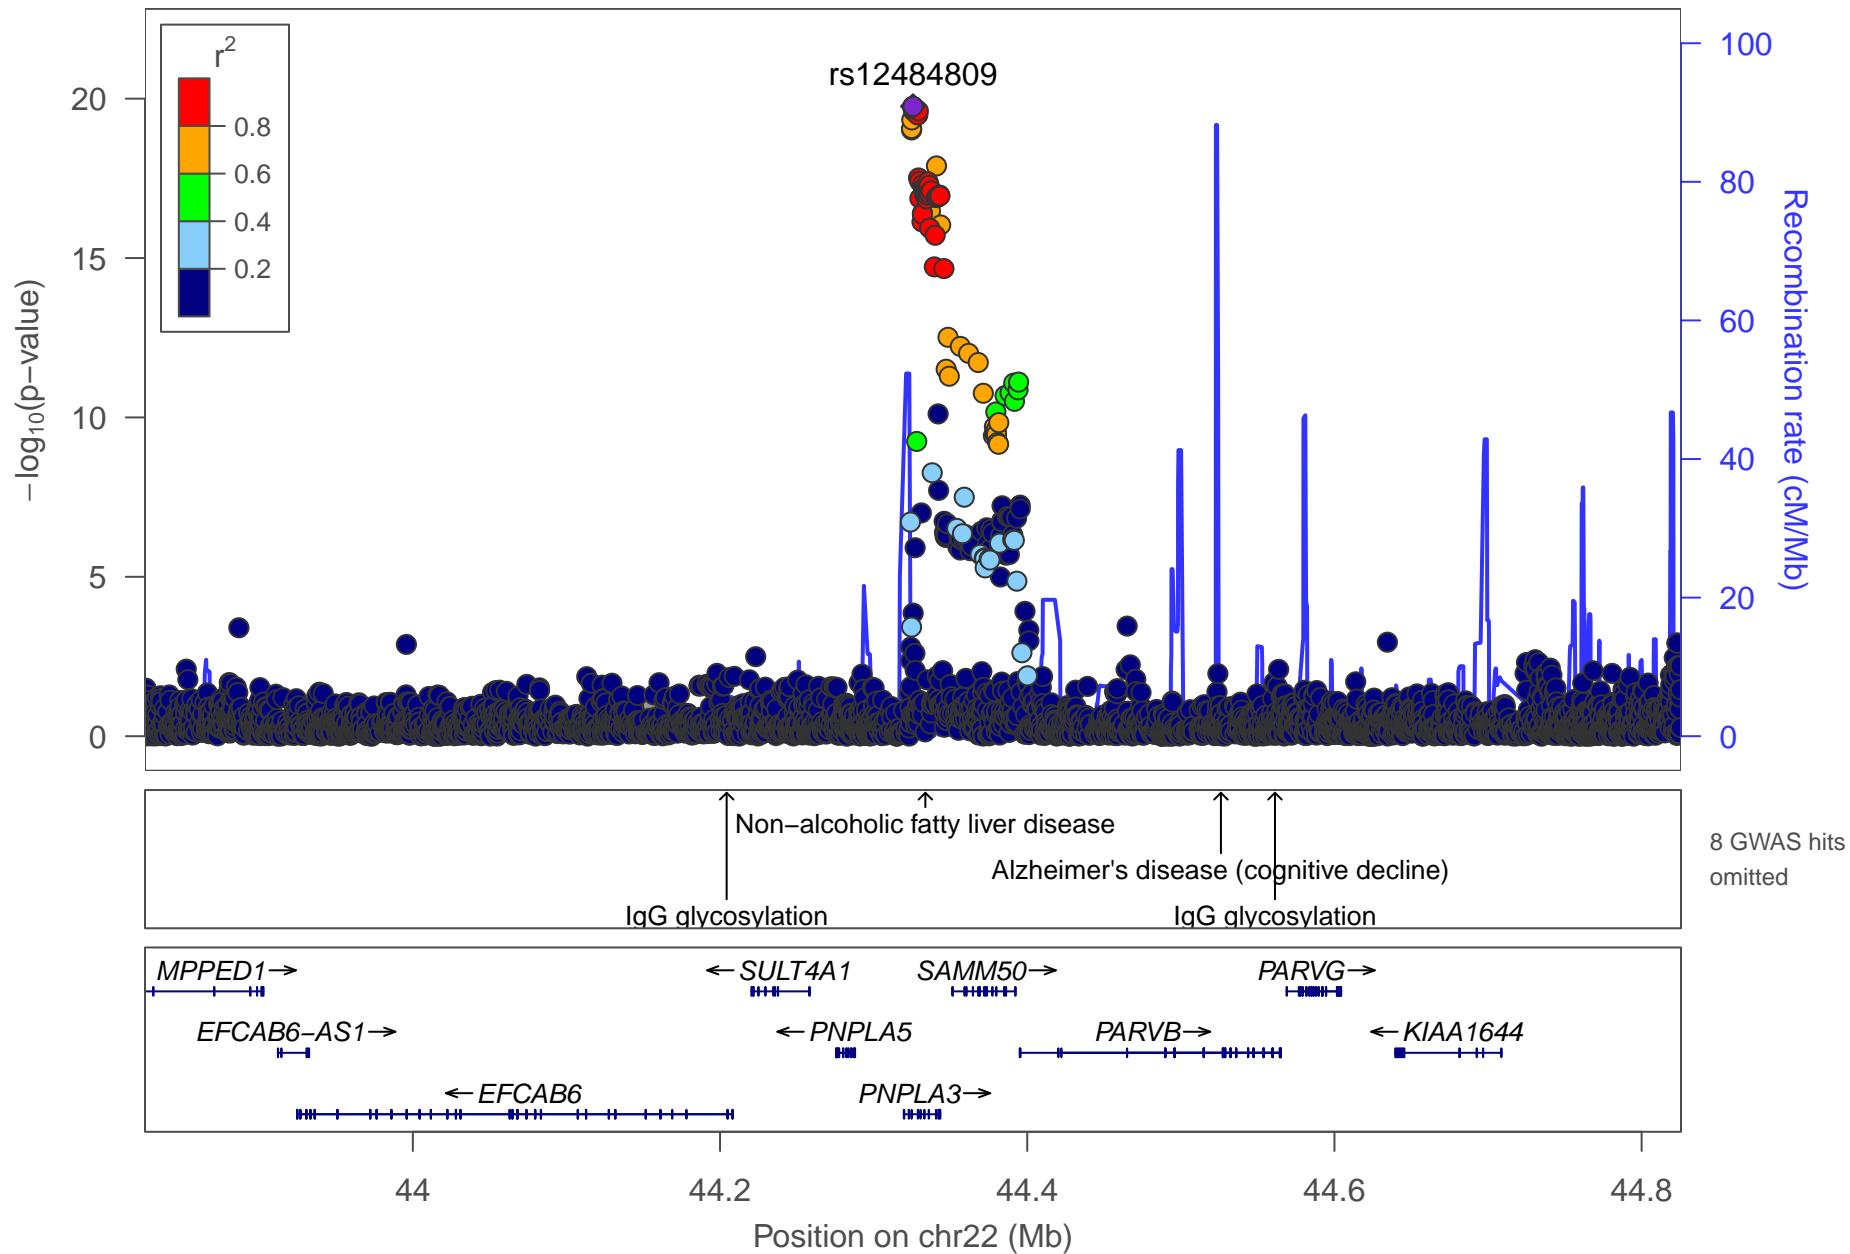



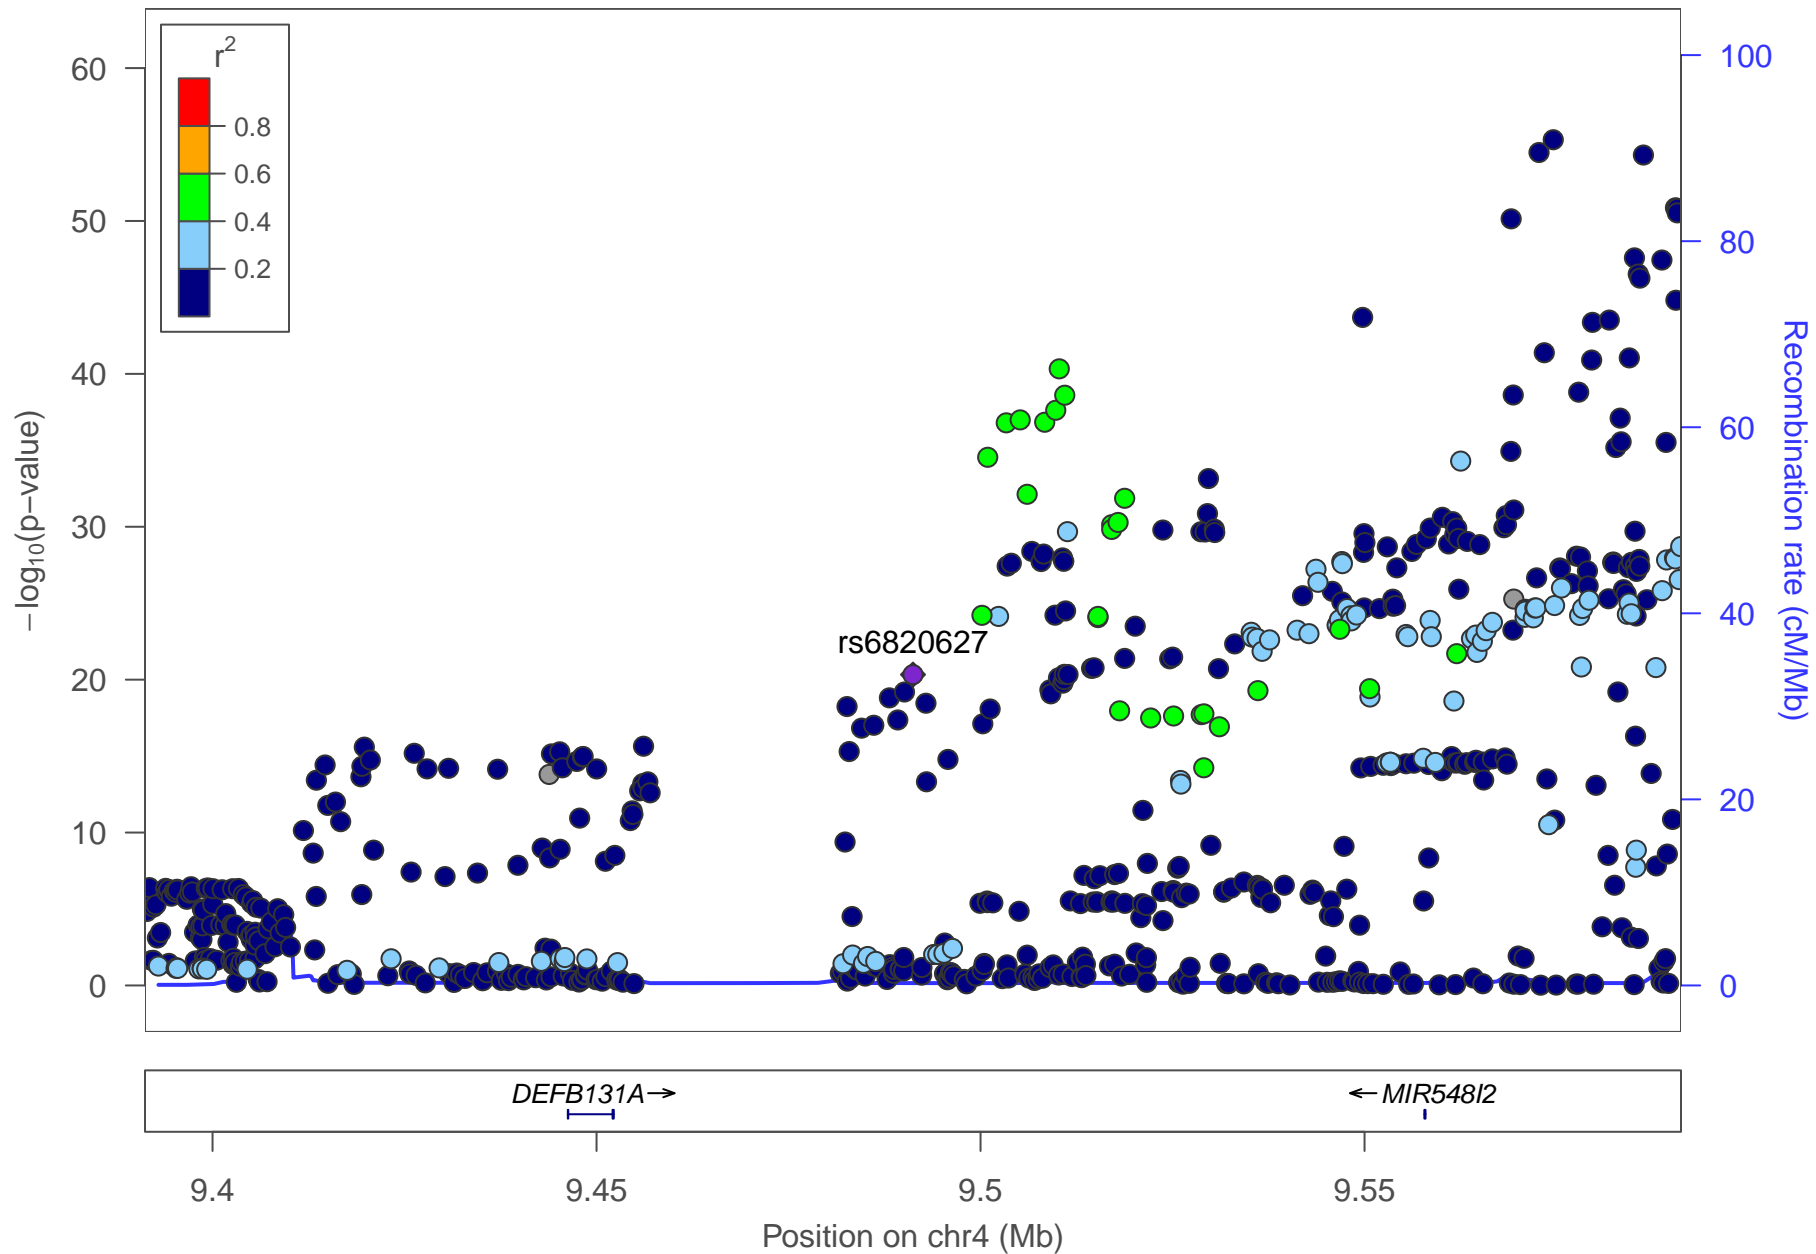

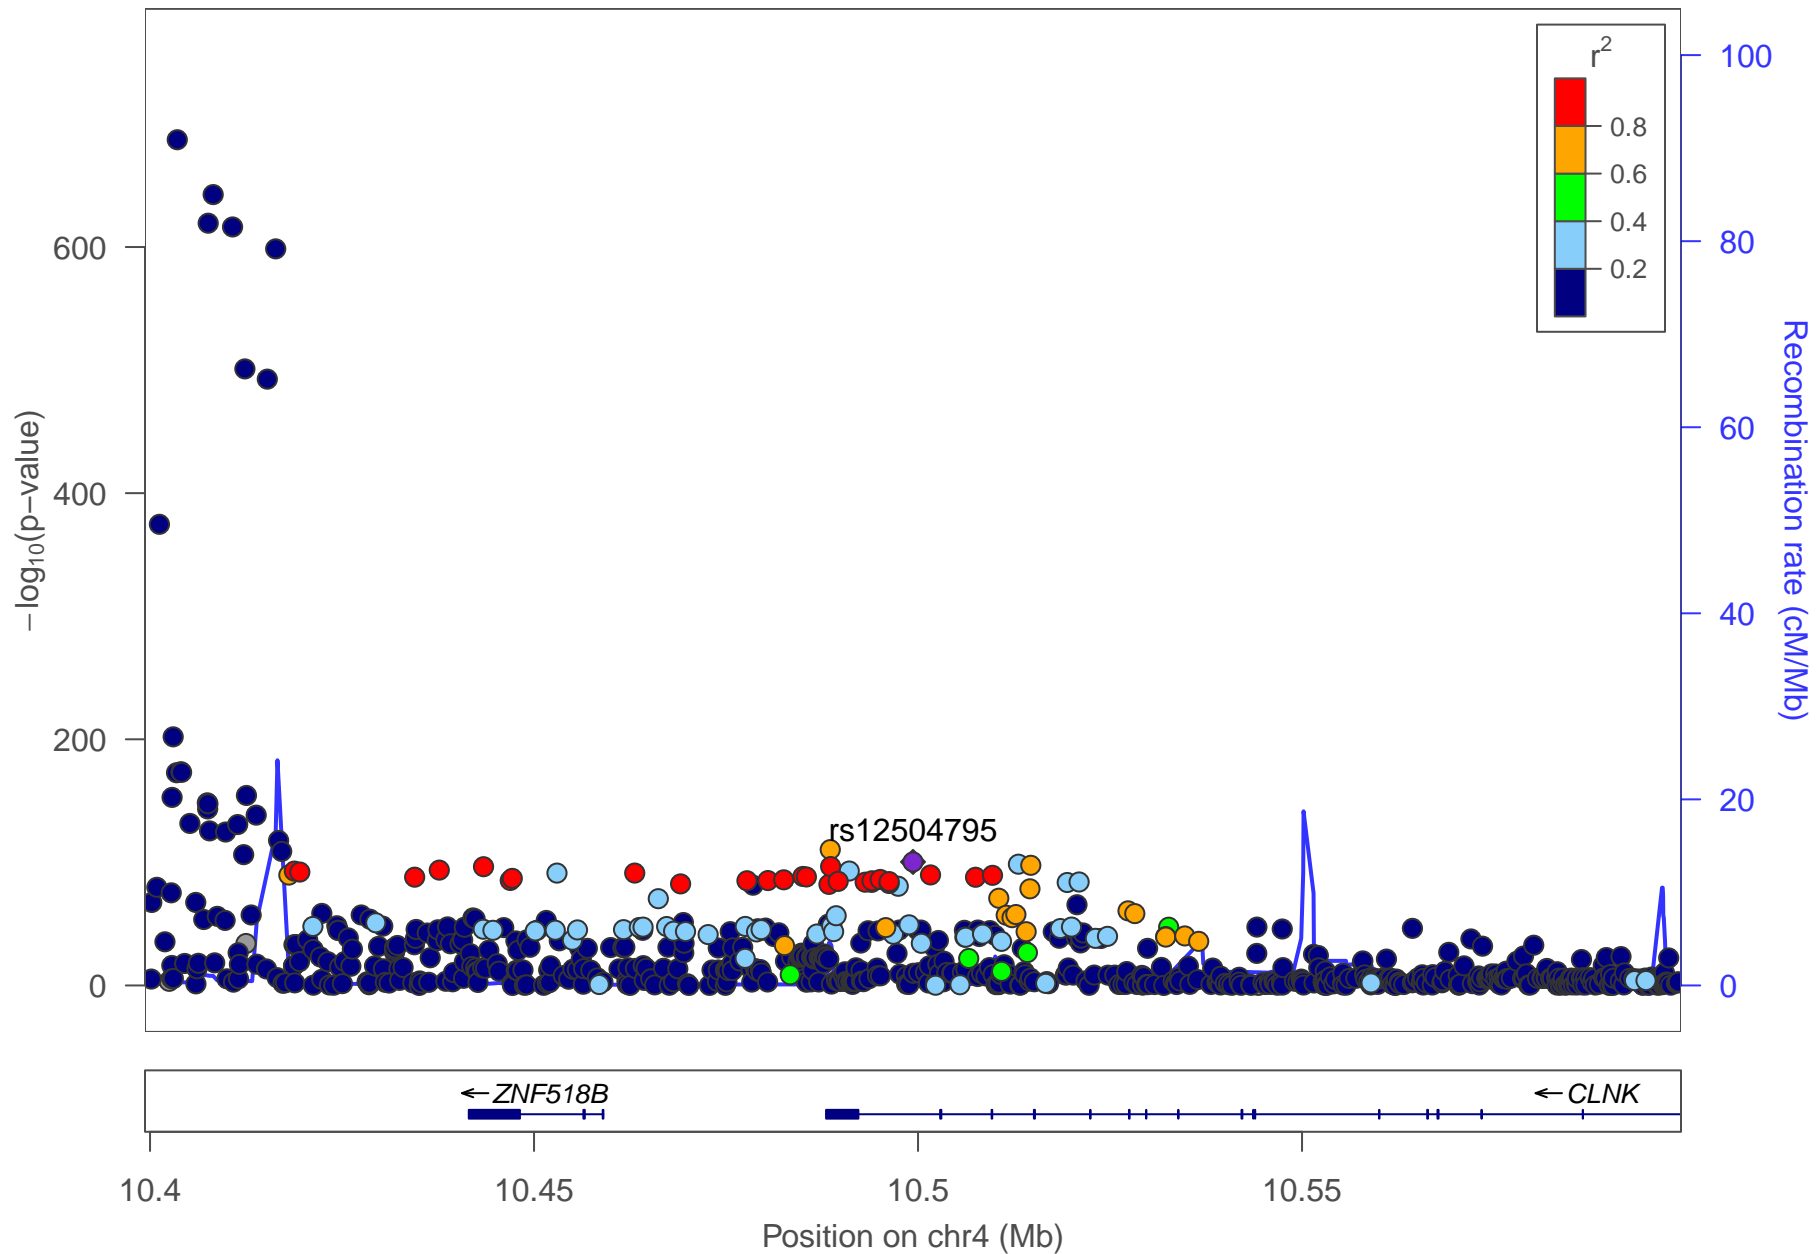

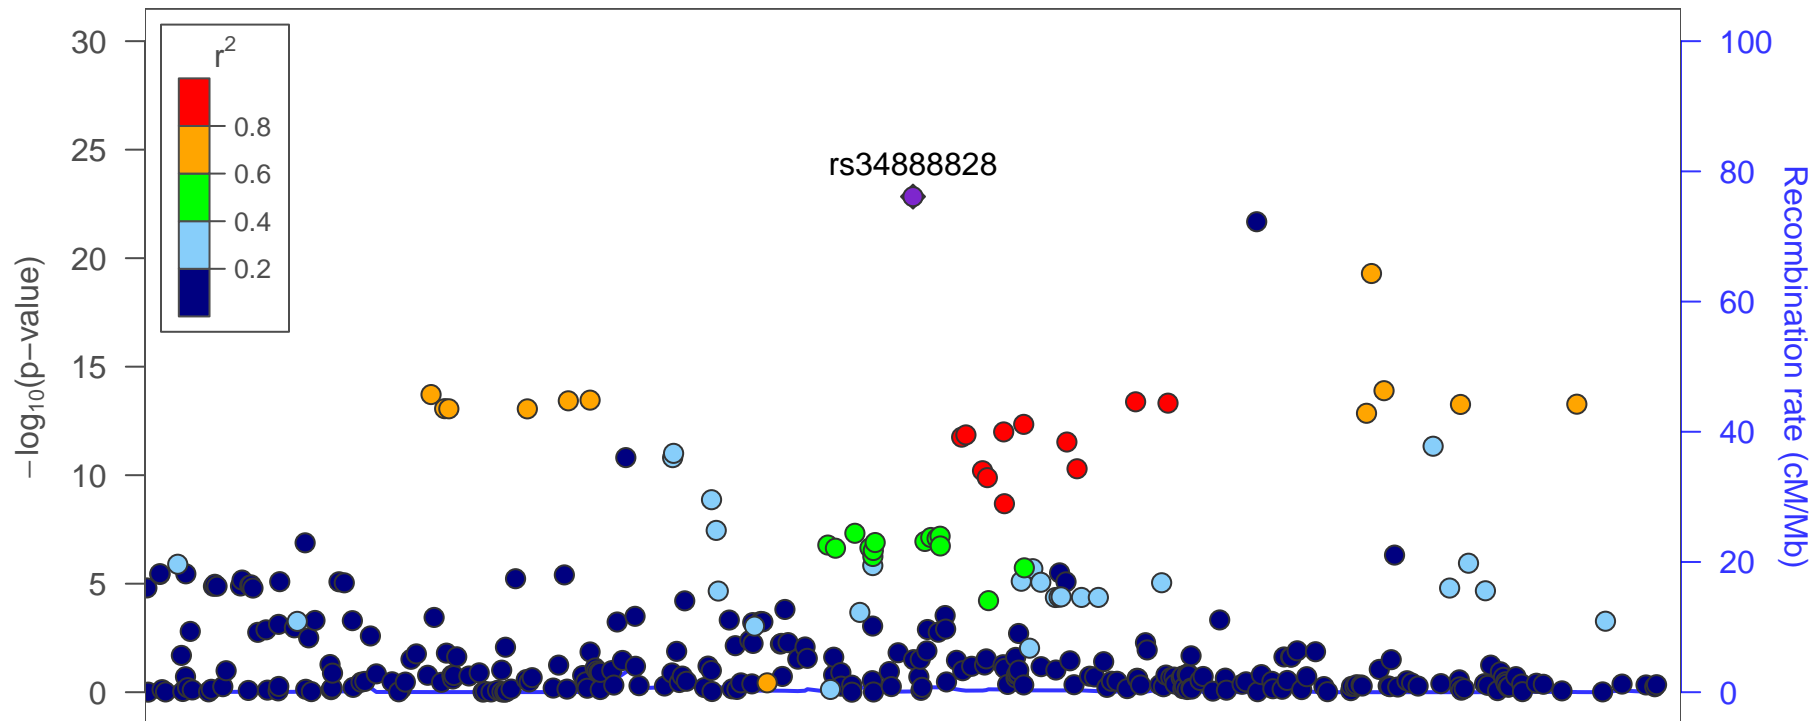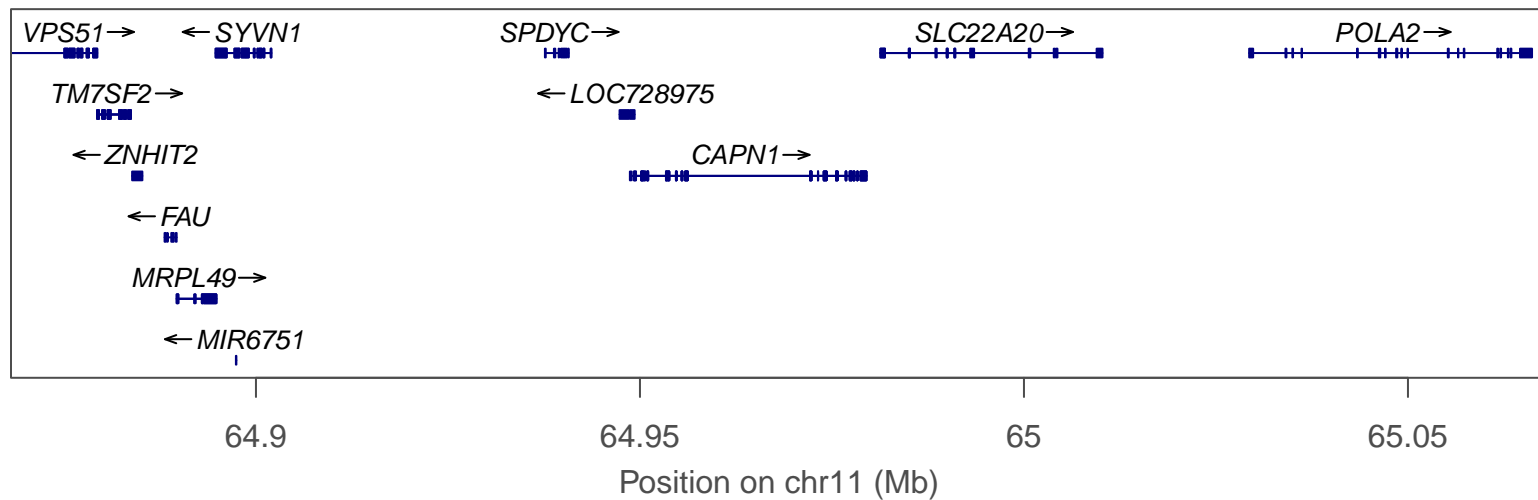

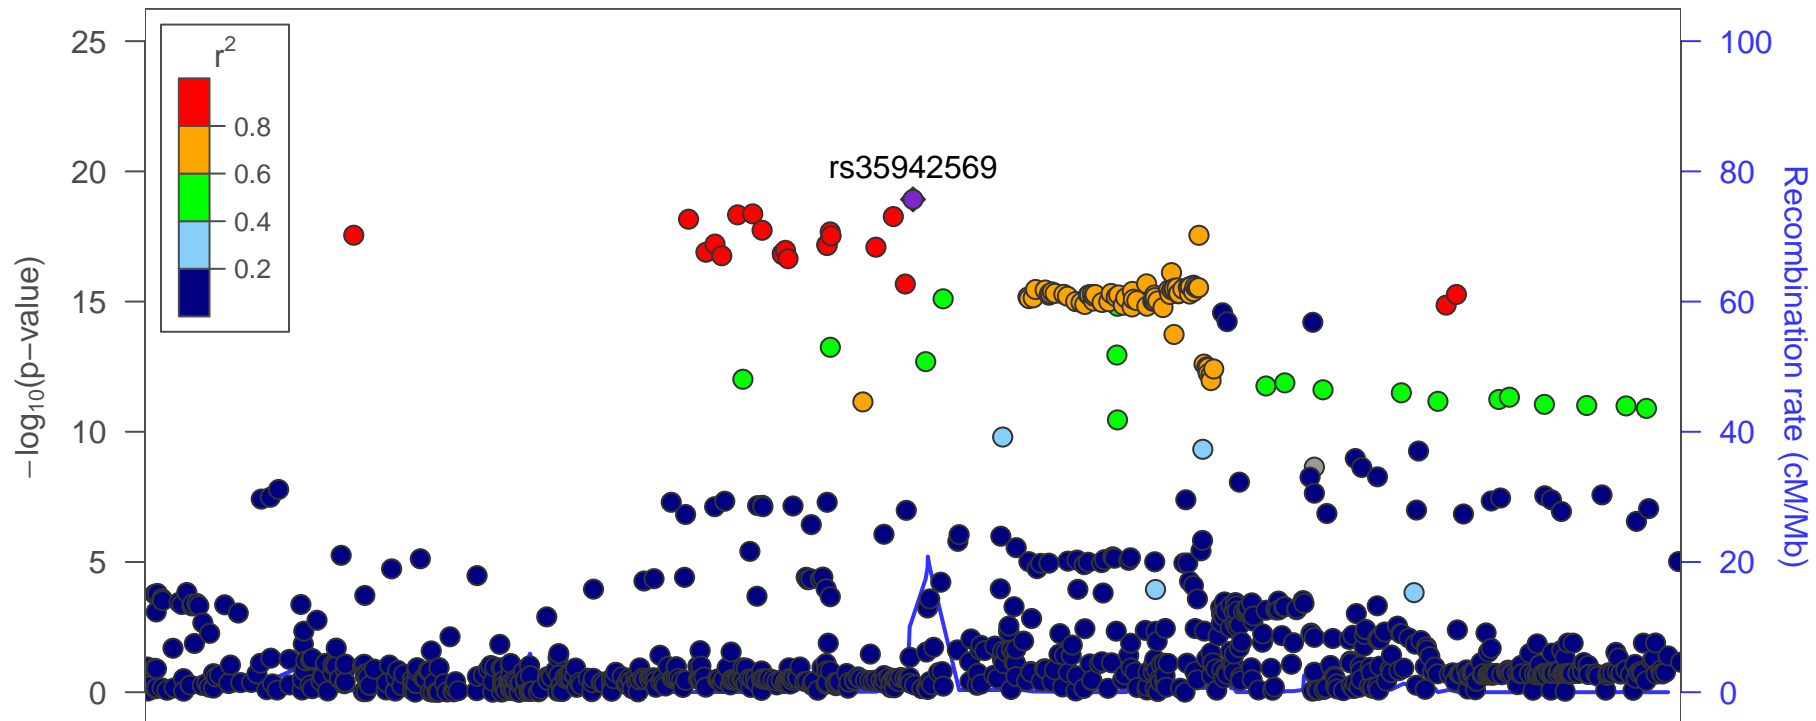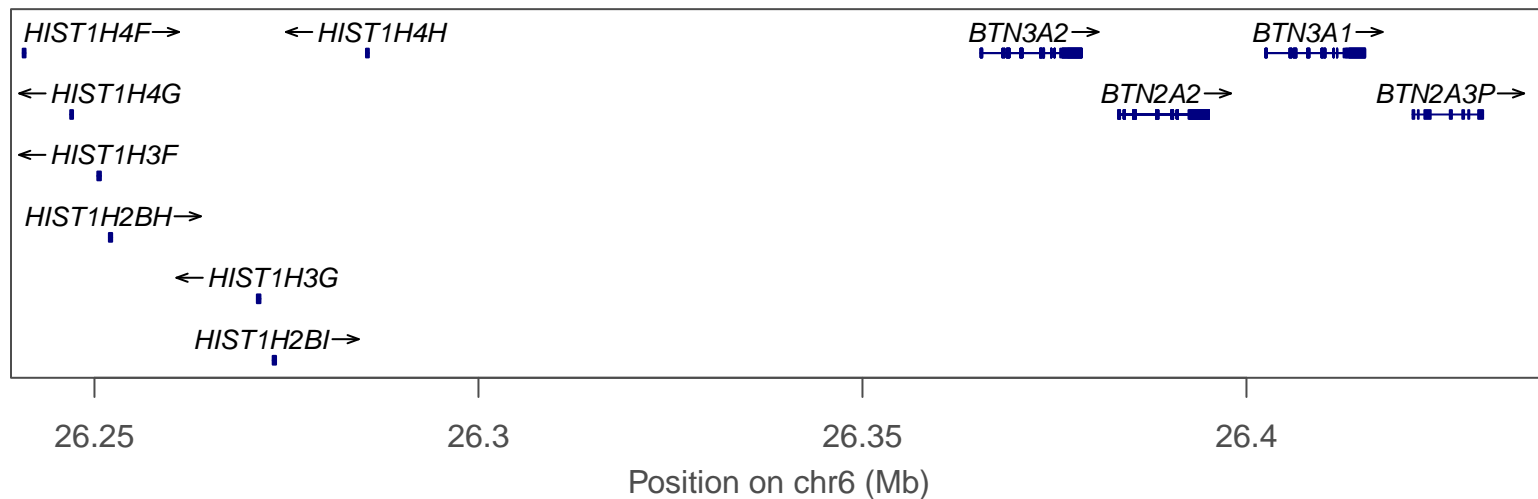

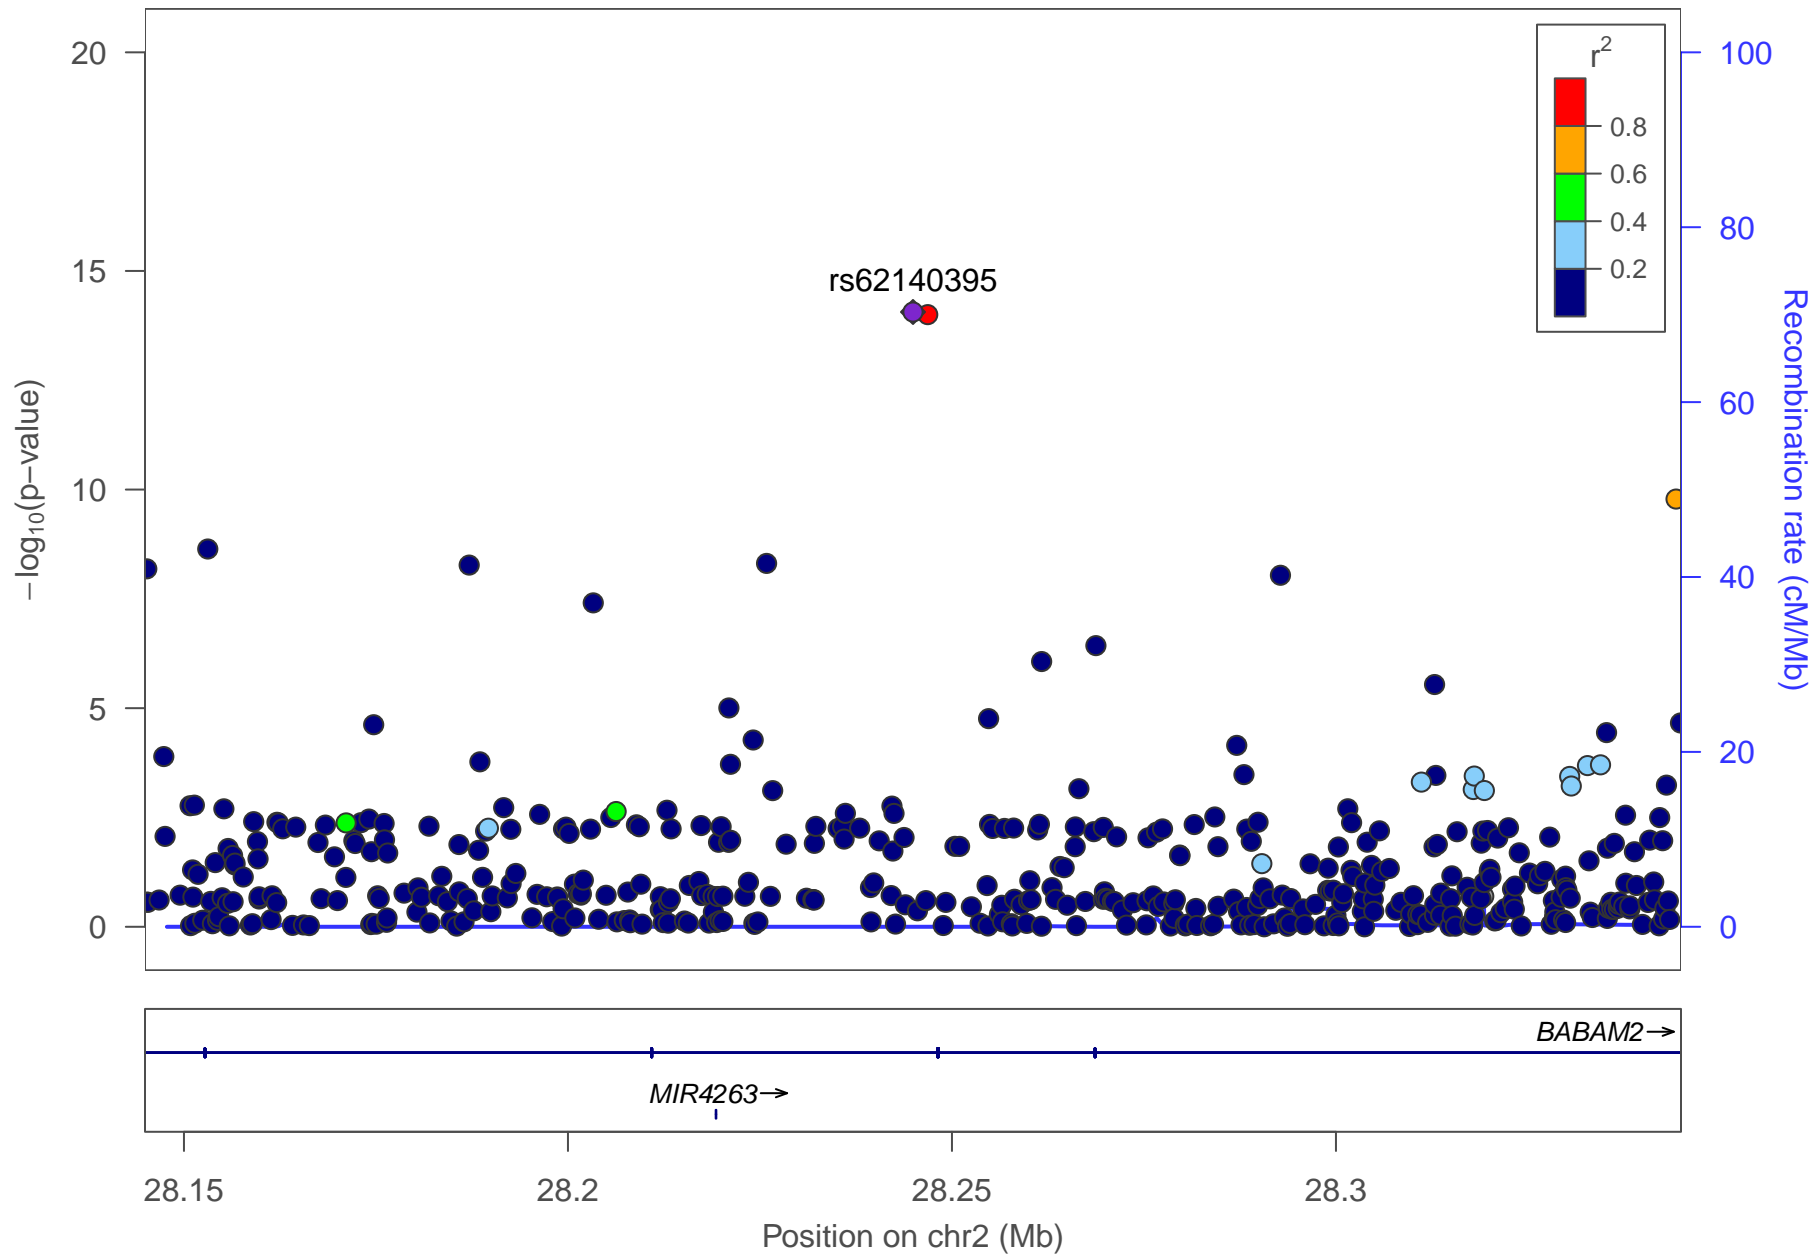

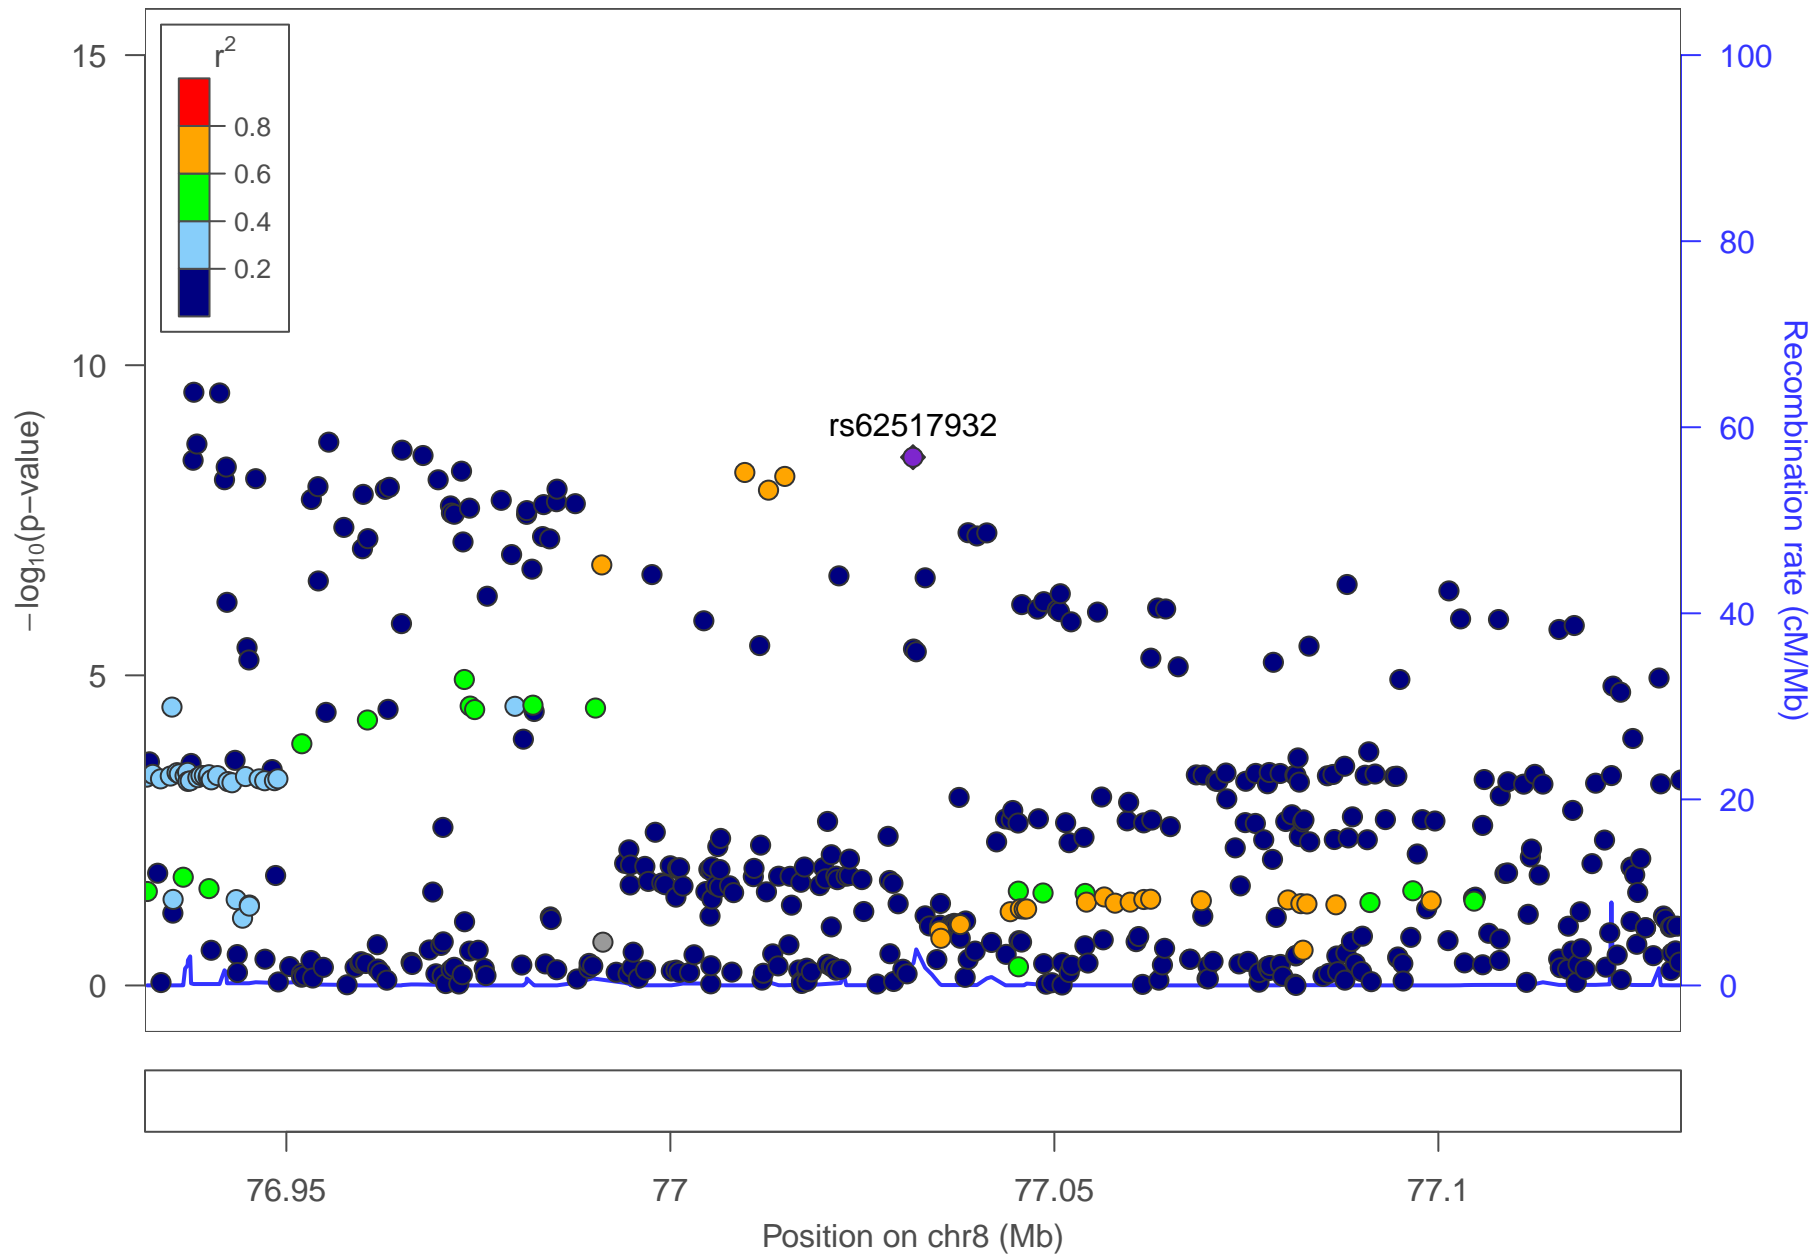

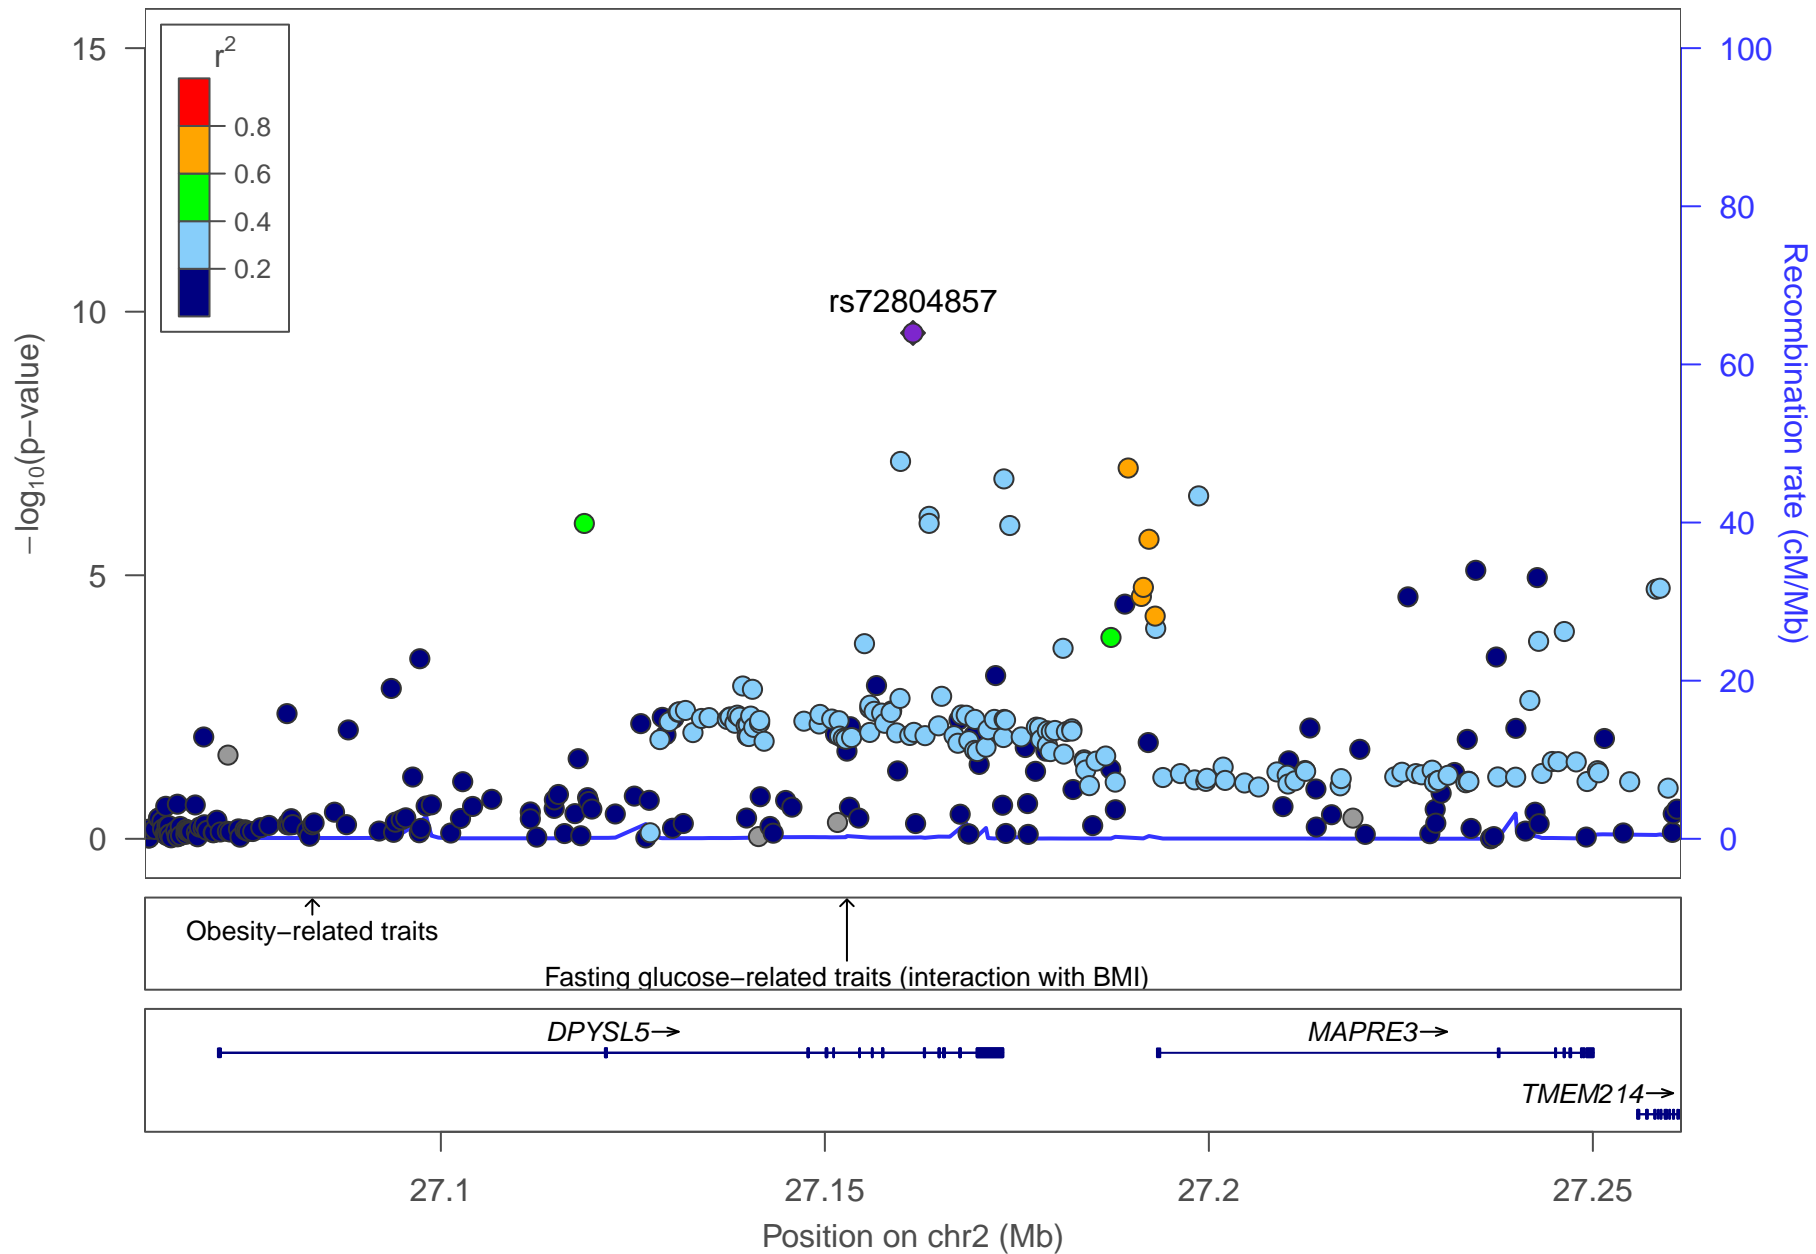

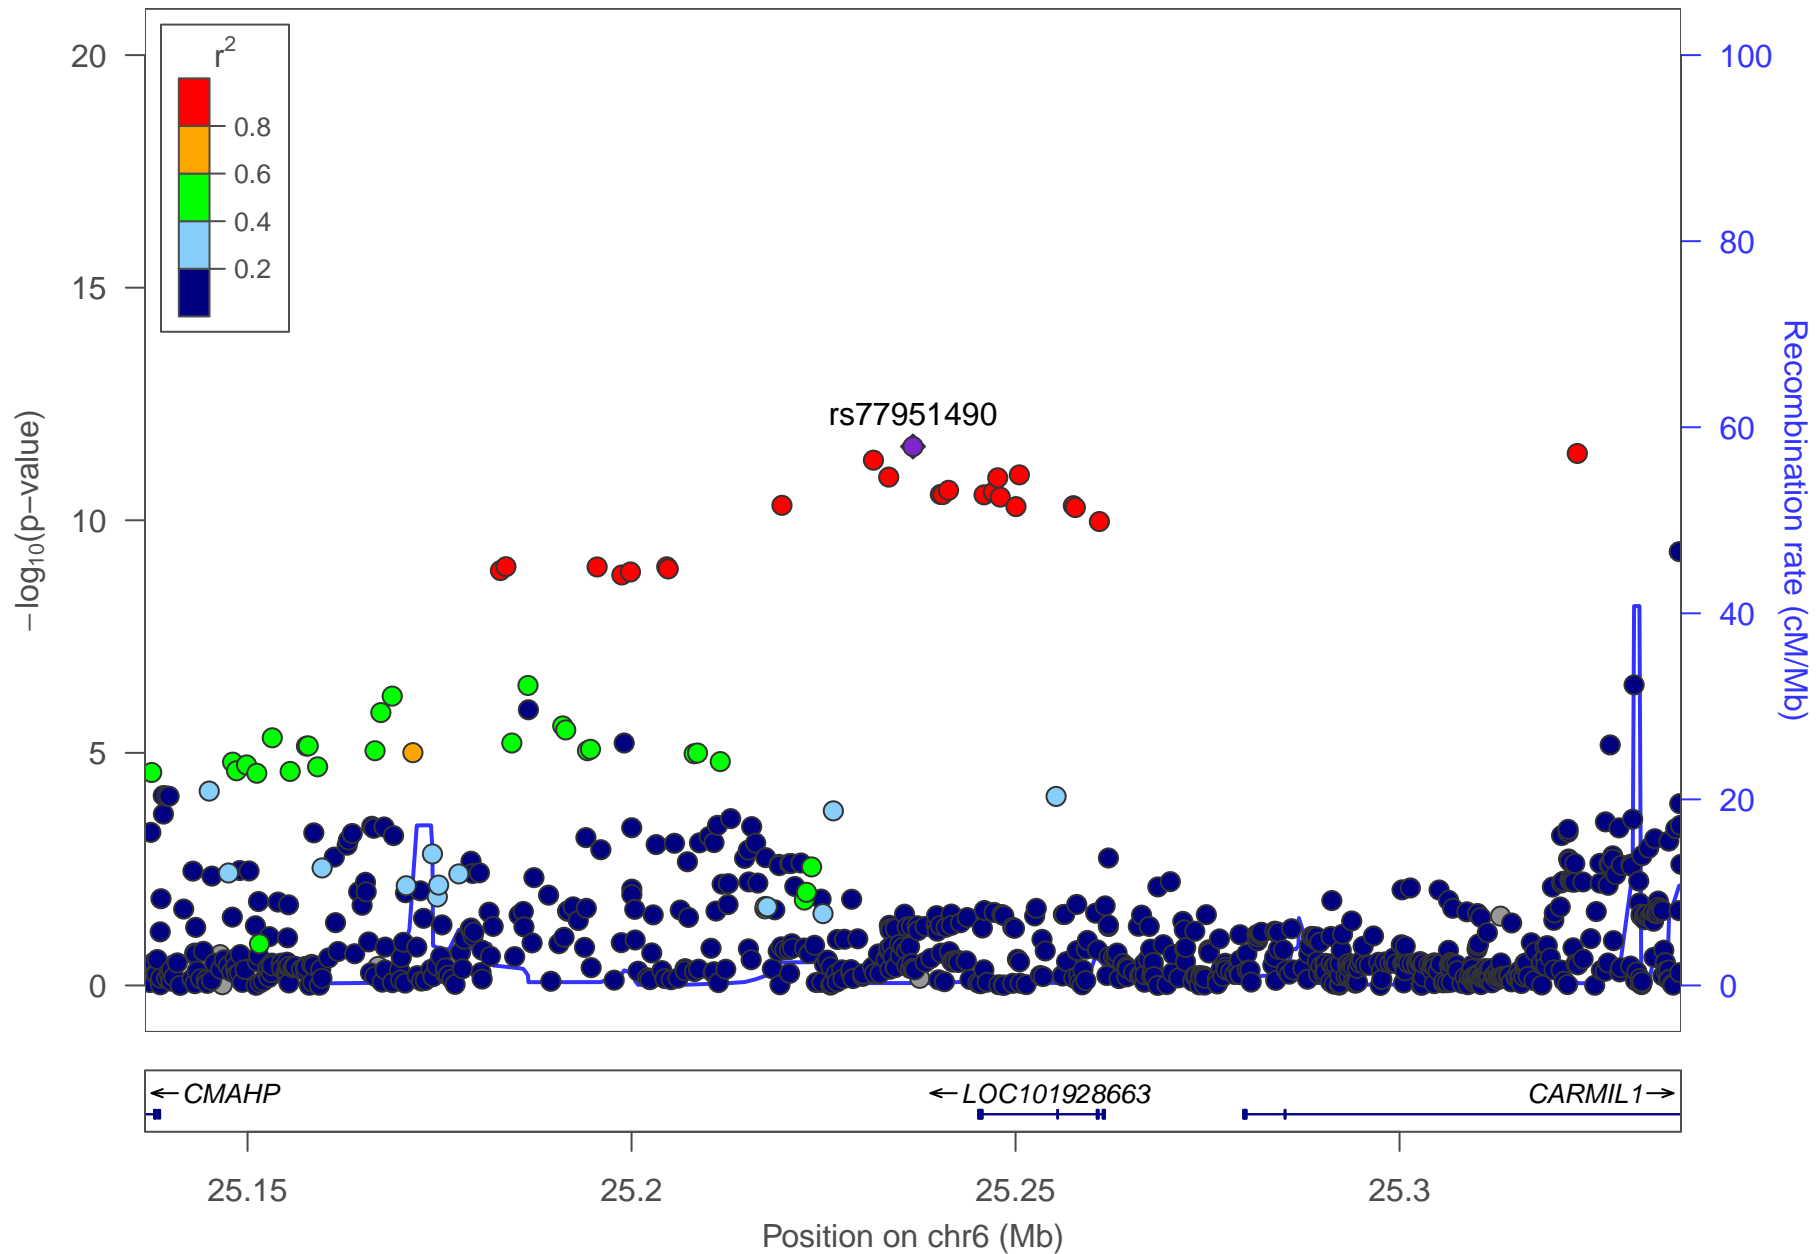



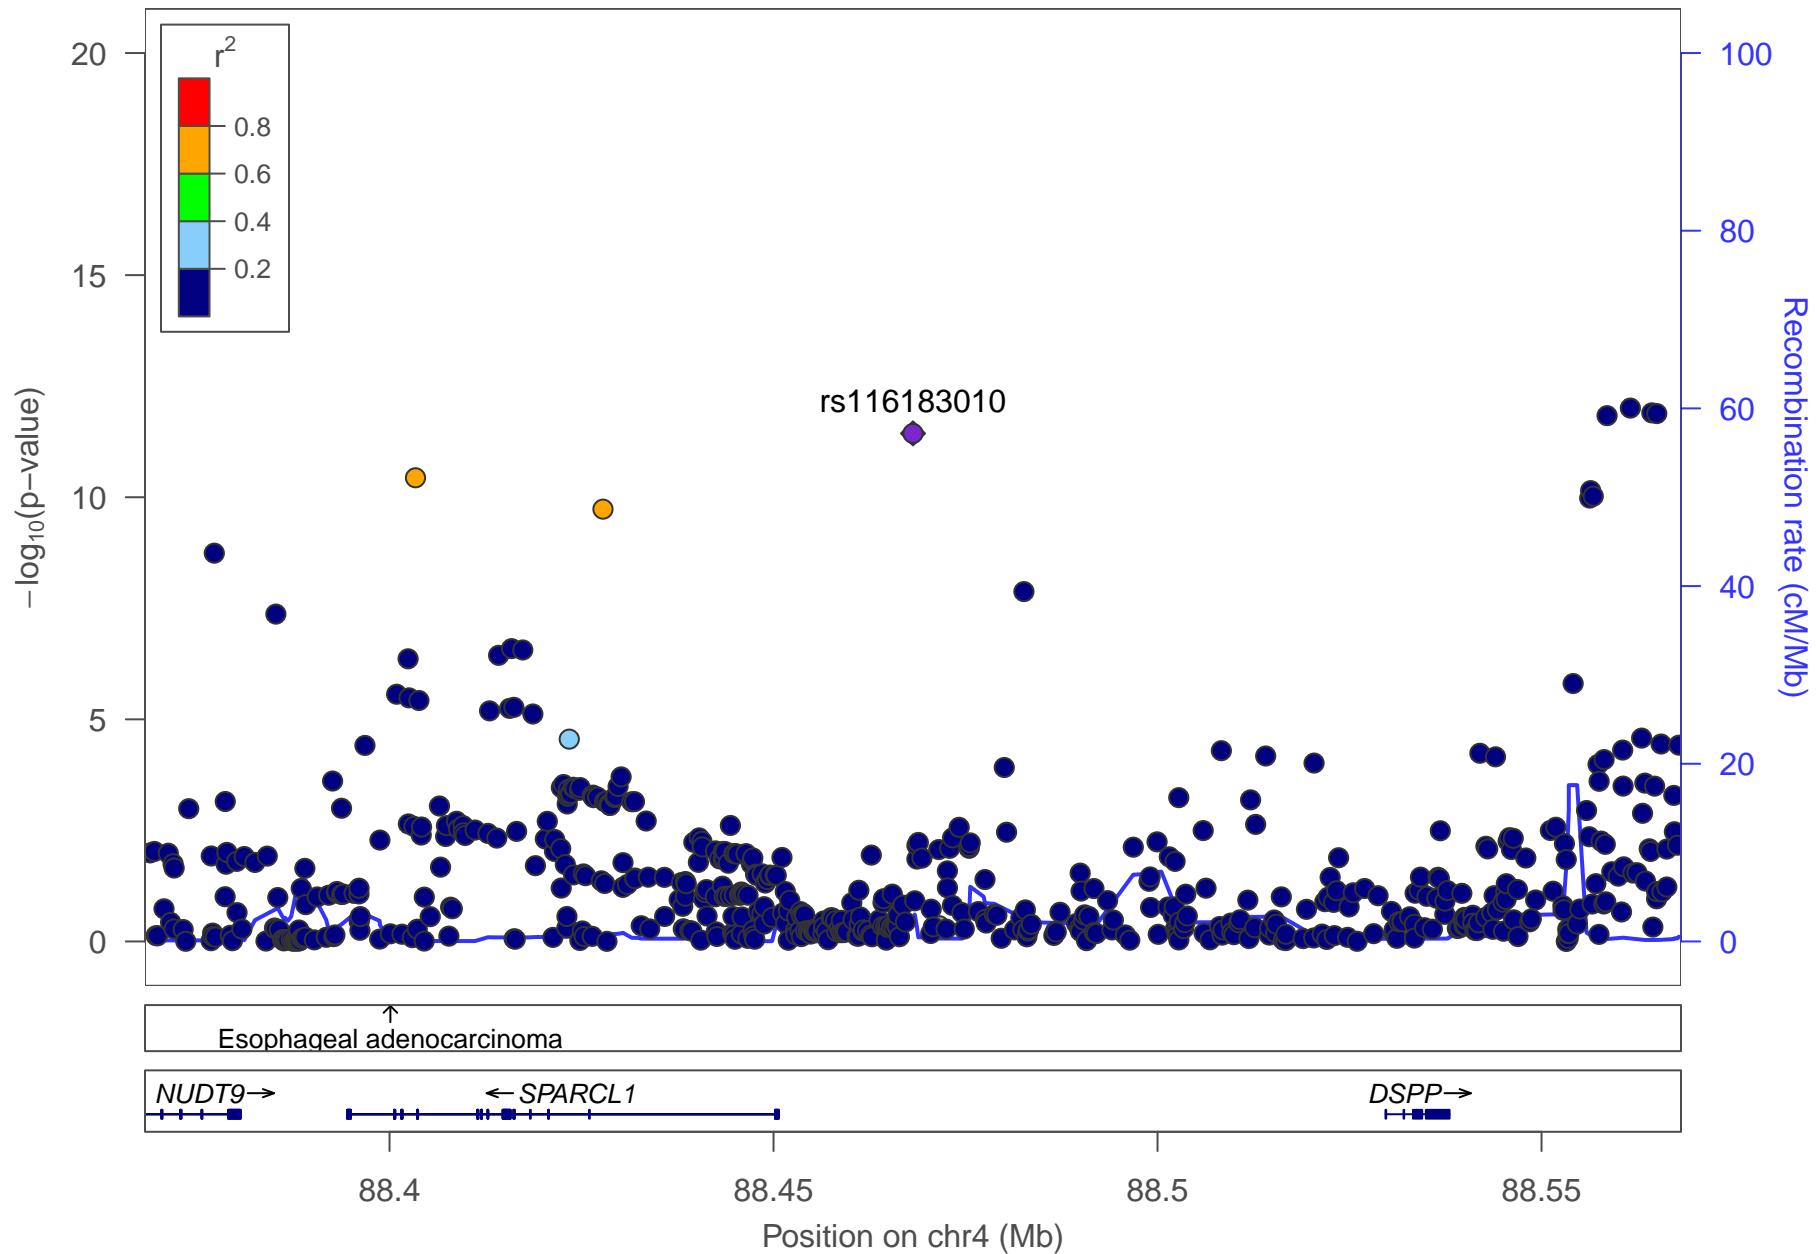

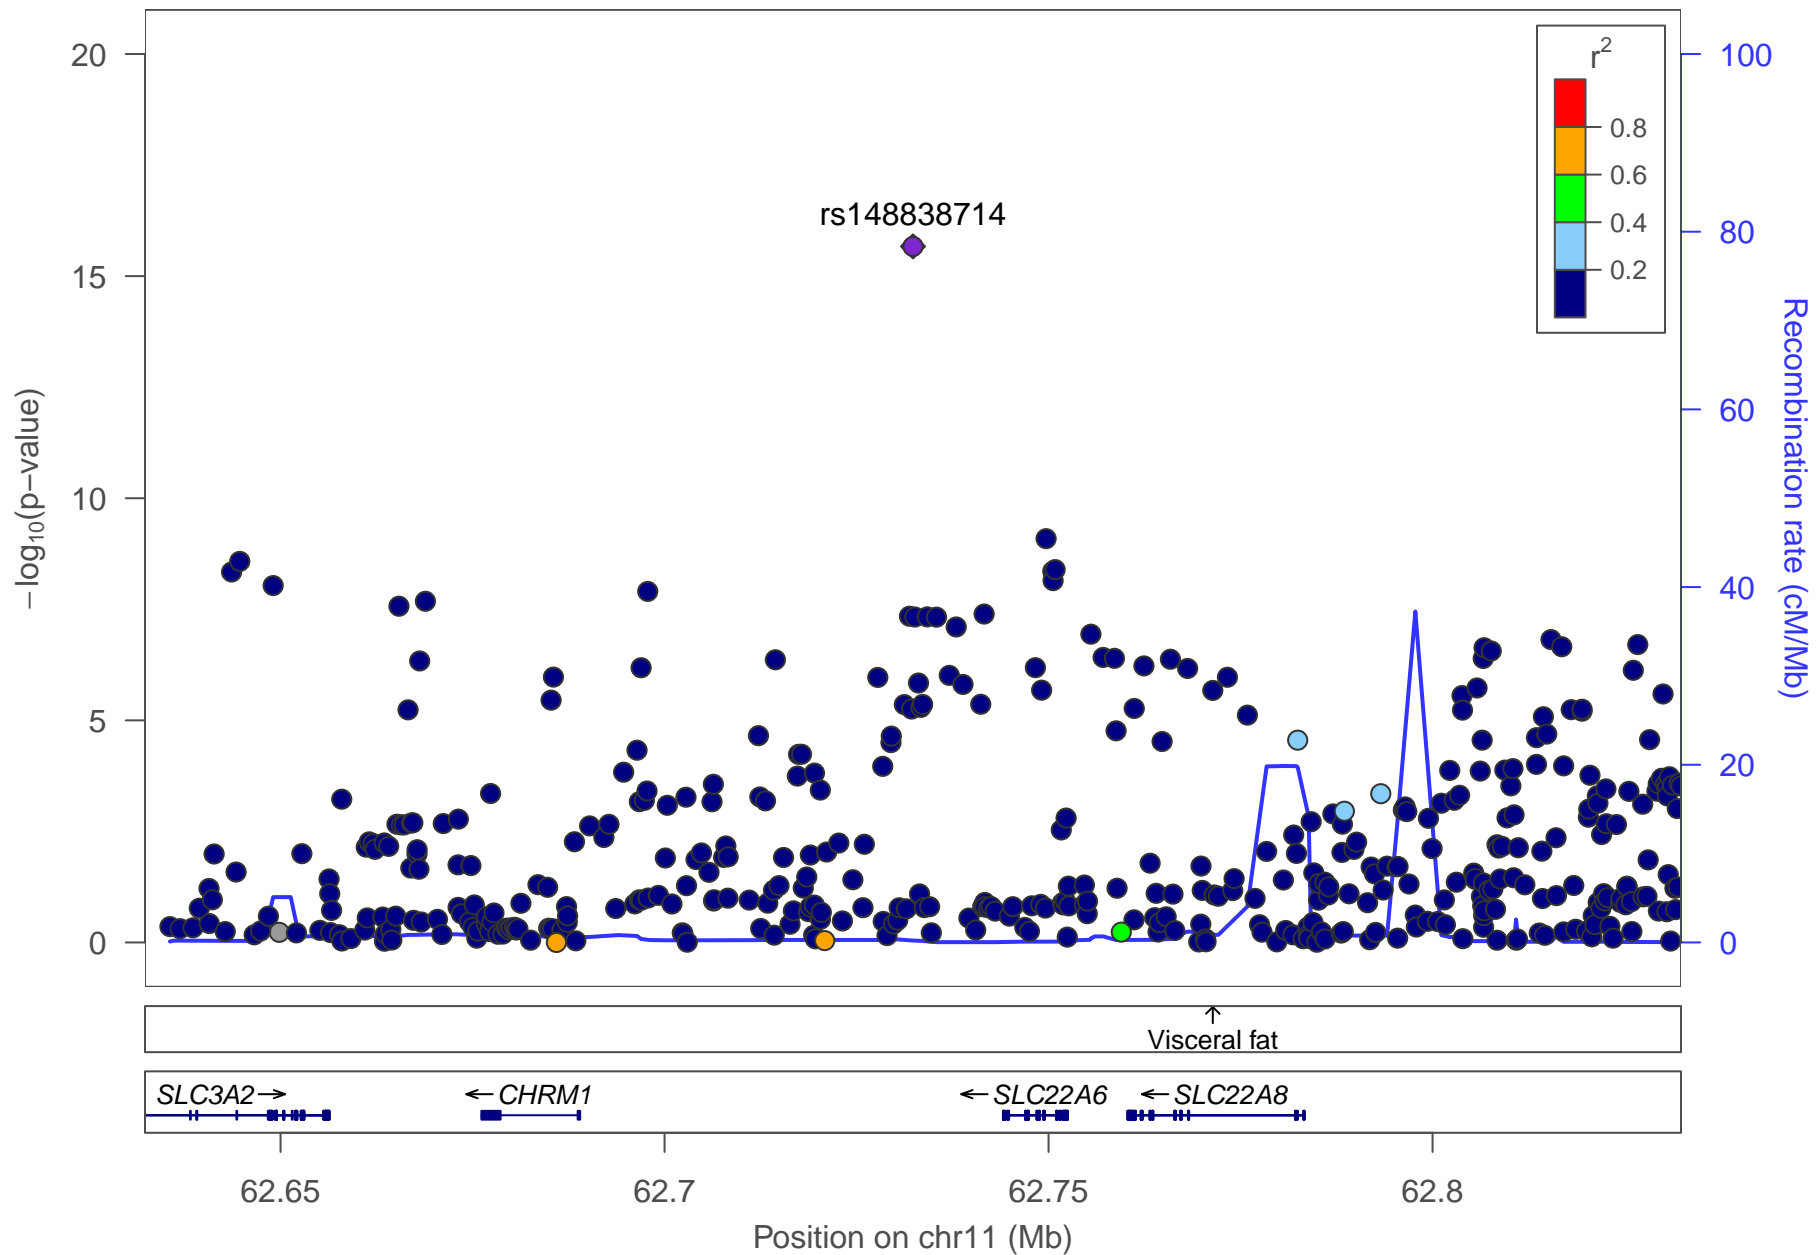

Supplement: NIHMS1538428-supplement-2.pdf [file NIHMS1538428-supplement-2.pdf]
